# Supplementary material for: Intrarenal activation of adaptive immune effectors is associated with tubular damage and impaired renal function in lupus nephritis
Source: PubMed Central journal article supplement (PMC6241616; doi:10.1136/annrheumdis-2018-213485), 2018-07-31
Supplement: annrheumdis-2018-213485supp002.pdf [file annrheumdis-2018-213485supp002.pdf]

**Supplementary Table 1 : Transcripts and pathways up-regulated in SLE compared to control renal biopsies**

Differences in (Log2-transformed, mean-centered) gene expression between lupus and control biopsies were analyzed using a moderated t test with Benjamini-Hochberg correction for multiple comparisons (*p* value threshold set to 0.05). Pathway analyses were performed using DAVID software. Enrichment scores are  $-\log_{10} p$  values, calculated by modified Fisher Exact test by comparing proportions of transcripts belonging to a given pathway in the tested gene list compared to the whole transcriptome.[14, 15]

**Transcripts**

| Identifier   | [Control]  | [SLE]      | Gene Symbol |
|--------------|------------|------------|-------------|
| ILMN_2054019 | -1.8367431 | 0.8733817  | ISG15       |
| ILMN_3240375 | -1.9034421 | 0.8672207  | abParts     |
| ILMN_1739508 | -1.7163734 | 0.8066571  | abParts     |
| ILMN_2103107 | -1.8484101 | 0.6729792  | ADAMDEC1    |
| ILMN_1778977 | -0.7100609 | 0.62325823 | TYROBP      |
| ILMN_1704286 | -0.7749682 | 0.619152   | FXD5        |
| ILMN_2170814 | -2.5021515 | 0.6106421  | LAMP3       |
| ILMN_1680274 | -1.6995718 | 0.5754184  | abParts     |
| ILMN_1652199 | -1.6970621 | 0.57067966 | abParts     |
| ILMN_2083066 | -2.5462198 | 0.5612969  | IGLL3P      |
| ILMN_1674228 | -0.9006702 | 0.55473113 | abParts     |
| ILMN_1659913 | -0.8059585 | 0.5446736  | ISG20       |
| ILMN_1672606 | -0.7296701 | 0.5338008  | OAS1        |
| ILMN_1695851 | -0.8407382 | 0.532421   | PARVG       |
| ILMN_2146766 | -0.7411417 | 0.5317069  | FABP5       |
| ILMN_1696302 | -0.8049086 | 0.5251267  | FABP5       |
| ILMN_1886655 | -1.267512  | 0.5189515  | TCRVB       |
| ILMN_1752899 | -0.6961275 | 0.518324   | BCL11A      |
| ILMN_2325837 | -0.9341917 | 0.5164521  | CD3D        |
| ILMN_1779852 | -0.8254615 | 0.5040414  | FABP5L3     |
| ILMN_1754507 | -2.2113416 | 0.4878948  | IRF4        |
| ILMN_1682993 | -0.8189868 | 0.48173356 | NKG7        |
| ILMN_1714602 | -1.0103395 | 0.46908656 | CD86        |
| ILMN_1710734 | -0.9052631 | 0.45434737 | GZMK        |
| ILMN_1791759 | -1.2359245 | 0.45214474 | CXCL10      |
| ILMN_1801246 | -1.8158823 | 0.44969594 | IFITM1      |
| ILMN_1677505 | -0.8335129 | 0.4461307  | CCL21       |
| ILMN_2231928 | -2.2008712 | 0.4434064  | MX2         |
| ILMN_2375825 | -0.4494968 | 0.44047216 | CD37        |
| ILMN_1719759 | -1.0855303 | 0.43799433 | TNC         |
| ILMN_1790761 | -1.575065  | 0.43785053 | POSTN       |
| ILMN_2232121 | -1.0042269 | 0.43288076 | GPR65       |
| ILMN_2135272 | -0.969066  | 0.43147218 | GIMAP2      |
| ILMN_1728106 | -1.2595581 | 0.4270727  | TNF         |
| ILMN_3249667 | -0.7323164 | 0.42657584 | HLA-DQA1    |
| ILMN_2254635 | -2.3059683 | 0.41904867 | ITGAX       |
| ILMN_3266606 | -1.1168858 | 0.4060247  | FABP5       |
| ILMN_2208903 | -0.7734711 | 0.38791603 | CD52        |
| ILMN_1769229 | -1.2805104 | 0.38425326 | BCL2A1      |
| ILMN_1787509 | -0.9047725 | 0.3832354  | PRIC285     |
| ILMN_2179083 | -0.9967498 | 0.3825167  | LOXL4       |
| ILMN_1749006 | -0.8976072 | 0.37745827 | RCS1        |
| ILMN_2061043 | -1.1870687 | 0.37040937 | CD48        |
| ILMN_1758067 | -1.4429107 | 0.367198   | RG54        |
| ILMN_1806908 | -1.0466263 | 0.36677915 | PRKCB       |
| ILMN_1662843 | -1.2426662 | 0.36529452 | CD53        |
| ILMN_1682312 | -0.6436449 | 0.3637218  | CYBB        |
| ILMN_1798181 | -1.2807904 | 0.35389298 | IRF7        |
| ILMN_1780368 | -1.1570473 | 0.35253793 | GPR18       |
| ILMN_1693452 | -1.0383923 | 0.35075316 | GAL3ST4     |

**Pathways**

| Annotation Cluster   | Enrichment Score                 | Count               | P_Value                                                                            | Benjamini             |
|----------------------|----------------------------------|---------------------|------------------------------------------------------------------------------------|-----------------------|
| Annotation Cluster 1 | Enrichment Score: 8.52           | GOTERM_BP_FAT       | <a href="#">defense response</a>                                                   | 42 2.20E-10 1.60E-07  |
|                      |                                  | GOTERM_BP_FAT       | <a href="#">response to wounding</a>                                               | 38 5.10E-10 2.70E-07  |
|                      |                                  | GOTERM_BP_FAT       | <a href="#">inflammatory response</a>                                              | 25 2.40E-07 6.40E-05  |
| Annotation Cluster 2 | Enrichment Score: 6.1            | SP_PIR_KEYWORDS     | <a href="#">signal</a>                                                             | 115 1.90E-10 6.90E-08 |
|                      |                                  | UP_SEQ_FEATURE      | signal peptide                                                                     | 115 2.80E-10 3.70E-07 |
|                      |                                  | SP_PIR_KEYWORDS     | <a href="#">disulfide bond</a>                                                     | 102 7.20E-09 8.90E-07 |
|                      |                                  | UP_SEQ_FEATURE      | disulfide bond                                                                     | 98 2.70E-08 1.80E-05  |
|                      |                                  | SP_PIR_KEYWORDS     | <a href="#">glycoprotein</a>                                                       | 131 1.20E-07 1.10E-05 |
|                      |                                  | UP_SEQ_FEATURE      | glycosylation site:N-linked (GlcNAc...)                                            | 119 1.20E-05 4.10E-03 |
|                      |                                  | GOTERM_CC_FAT       | <a href="#">extracellular region part</a>                                          | 41 6.90E-05 7.20E-03  |
|                      |                                  | GOTERM_CC_FAT       | <a href="#">extracellular space</a>                                                | 31 2.60E-04 1.20E-02  |
|                      |                                  | GOTERM_CC_FAT       | <a href="#">extracellular region</a>                                               | 67 4.30E-04 1.70E-02  |
|                      |                                  | SP_PIR_KEYWORDS     | <a href="#">Secreted</a>                                                           | 53 1.00E-03 1.50E-02  |
| Annotation Cluster 3 | Enrichment Score: 4.85           | GOTERM_BP_FAT       | <a href="#">cell activation</a>                                                    | 27 1.10E-09 4.50E-07  |
|                      |                                  | GOTERM_BP_FAT       | <a href="#">leukocyte activation</a>                                               | 22 9.60E-08 3.40E-05  |
|                      |                                  | GOTERM_BP_FAT       | <a href="#">T cell activation</a>                                                  | 16 1.20E-07 3.50E-05  |
|                      |                                  | GOTERM_BP_FAT       | <a href="#">lymphocyte activation</a>                                              | 19 4.40E-07 1.00E-04  |
|                      |                                  | GOTERM_BP_FAT       | <a href="#">immune system development</a>                                          | 20 1.20E-05 2.20E-03  |
|                      |                                  | GOTERM_BP_FAT       | <a href="#">hemopoietic or lymphoid organ development</a>                          | 19 1.90E-05 3.10E-03  |
|                      |                                  | GOTERM_BP_FAT       | <a href="#">hemopoiesis</a>                                                        | 18 2.00E-05 2.80E-03  |
|                      |                                  | GOTERM_BP_FAT       | <a href="#">T cell differentiation</a>                                             | 8 5.60E-04 4.40E-02   |
|                      |                                  | GOTERM_BP_FAT       | <a href="#">leukocyte differentiation</a>                                          | 11 6.50E-04 4.80E-02  |
|                      |                                  | GOTERM_BP_FAT       | <a href="#">lymphocyte differentiation</a>                                         | 8 7.80E-03 2.40E-01   |
| GOTERM_BP_FAT        | <a href="#">T cell selection</a> | 3 6.50E-02 5.70E-01 |                                                                                    |                       |
| Annotation Cluster 4 | Enrichment Score: 4.59           | SP_PIR_KEYWORDS     | <a href="#">lipoprotein</a>                                                        | 34 6.60E-07 4.10E-05  |
|                      |                                  | UP_SEQ_FEATURE      | lipid moiety-binding region:S-palmitoyl cysteine                                   | 14 7.40E-05 1.20E-02  |
|                      |                                  | SP_PIR_KEYWORDS     | <a href="#">palmitate</a>                                                          | 14 3.50E-04 6.20E-03  |
| Annotation Cluster 5 | Enrichment Score: 4.12           | GOTERM_CC_FAT       | <a href="#">plasma membrane part</a>                                               | 81 1.90E-06 2.90E-04  |
|                      |                                  | GOTERM_CC_FAT       | <a href="#">intrinsic to plasma membrane</a>                                       | 48 9.50E-05 7.40E-03  |
|                      |                                  | GOTERM_CC_FAT       | <a href="#">integral to plasma membrane</a>                                        | 46 2.20E-04 1.40E-02  |
|                      |                                  | UP_SEQ_FEATURE      | topological domain:Extracellular                                                   | 78 8.40E-04 9.70E-02  |
| Annotation Cluster 6 | Enrichment Score: 3.95           | UP_SEQ_FEATURE      | domain:SH3                                                                         | 15 1.30E-05 3.60E-03  |
|                      |                                  | SP_PIR_KEYWORDS     | <a href="#">sh3 domain</a>                                                         | 15 8.30E-05 1.80E-03  |
|                      |                                  | INTERPRO            | <a href="#">Src homology-3 domain</a>                                              | 15 1.10E-04 1.80E-02  |
|                      |                                  | SMART               | <a href="#">SH3</a>                                                                | 15 1.40E-03 2.10E-01  |
|                      |                                  | GOTERM_BP_FAT       | <a href="#">positive regulation of response to stimulus</a>                        | 20 1.20E-06 2.60E-04  |
| Annotation Cluster 7 | Enrichment Score: 3.64           | GOTERM_BP_FAT       | <a href="#">positive regulation of immune response</a>                             | 14 2.00E-05 3.00E-03  |
|                      |                                  | GOTERM_BP_FAT       | <a href="#">positive regulation of immune system process</a>                       | 18 2.20E-05 2.90E-03  |
|                      |                                  | GOTERM_BP_FAT       | <a href="#">immune effector process</a>                                            | 13 4.20E-05 5.10E-03  |
|                      |                                  | GOTERM_BP_FAT       | <a href="#">activation of immune response</a>                                      | 10 2.30E-04 2.10E-02  |
|                      |                                  | GOTERM_BP_FAT       | <a href="#">leukocyte mediated immunity</a>                                        | 9 6.20E-04 4.70E-02   |
|                      |                                  | GOTERM_BP_FAT       | <a href="#">immune response-activating signal transduction</a>                     | 7 9.60E-04 6.70E-02   |
|                      |                                  | GOTERM_BP_FAT       | <a href="#">immune response-regulating signal transduction</a>                     | 7 1.40E-03 8.50E-02   |
|                      |                                  | GOTERM_BP_FAT       | <a href="#">immune response-activating cell surface receptor signaling pathway</a> | 6 1.60E-03 9.10E-02   |

|              |            |            |            |
|--------------|------------|------------|------------|
| ILMN_2369018 | -1.3167466 | 0.34742686 | EV12A      |
| ILMN_1772964 | -1.1127529 | 0.33681542 | CCL8       |
| ILMN_2217574 | -0.6778461 | 0.33079284 | FABP5L3    |
| ILMN_1760509 | -1.4685779 | 0.33047506 | EOMES      |
| ILMN_1673357 | -0.7304227 | 0.32993287 | SLA2       |
| ILMN_1687301 | -1.5809488 | 0.32957417 | VCAN       |
| ILMN_1728923 | -0.9579498 | 0.32915558 | F2RL2      |
| ILMN_1656310 | -0.4940499 | 0.32283896 | IDO1       |
| ILMN_1801504 | -0.9557369 | 0.32217026 | RUNX1      |
| ILMN_1749362 | -1.1738353 | 0.31501293 | CD28       |
| ILMN_1677827 | -1.610075  | 0.31439185 | TLR7       |
| ILMN_1723480 | -1.4555889 | 0.31439024 | BST2       |
| ILMN_1674402 | -0.6813584 | 0.30988973 | TMEM71     |
| ILMN_1675640 | -0.99256   | 0.308559   | OAS1       |
| ILMN_2145670 | -1.3313366 | 0.30529922 | TNC        |
| ILMN_2085862 | -1.3194237 | 0.30307707 | SLC15A3    |
| ILMN_1802708 | -0.8654579 | 0.30057782 | BTN3A1     |
| ILMN_2058782 | -1.6705484 | 0.29868892 | IFI27      |
| ILMN_2412192 | -0.5491448 | 0.29791167 | CFH        |
| ILMN_1740633 | -1.1358054 | 0.29771525 | PRF1       |
| ILMN_2202894 | -1.643364  | 0.29721236 | F2RL2      |
| ILMN_3302919 | -0.7347454 | 0.29306167 | MYOF       |
| ILMN_1657871 | -2.23516   | 0.29136372 | RSAD2      |
| ILMN_1662358 | -2.3834696 | 0.2906471  | MX1        |
| ILMN_1780533 | -1.423368  | 0.29047525 | RNASE6     |
| ILMN_3237946 | -0.7705273 | 0.28753045 | PXDN       |
| ILMN_1691364 | -1.4878128 | 0.28612438 | STAT1      |
| ILMN_2042651 | -1.6108624 | 0.2831158  | EV12B      |
| ILMN_2066849 | -1.3265369 | 0.28190893 | FAM26F     |
| ILMN_1724533 | -0.9776902 | 0.28160933 | LY96       |
| ILMN_2105441 | -1.7997382 | 0.27848127 | IGJ        |
| ILMN_2413808 | -1.3141    | 0.27765673 | CD53       |
| ILMN_3234828 | -0.3738681 | 0.27627262 | TMEM229B   |
| ILMN_1684040 | -1.7639973 | 0.27530622 | THEMIS     |
| ILMN_1778723 | -1.2069848 | 0.2744472  | AMICA1     |
| ILMN_1685275 | -0.6273471 | 0.2738763  | MCAM       |
| ILMN_3306672 | -0.7661769 | 0.27119064 | PATL2      |
| ILMN_2326512 | -1.8256159 | 0.26943186 | CASP1      |
| ILMN_2353732 | -1.9275862 | 0.26927188 | CD8A       |
| ILMN_1734740 | -1.1187886 | 0.26920912 | GPR65      |
| ILMN_2307861 | -1.0338793 | 0.26916945 | COL6A3     |
| ILMN_1768595 | -0.8213046 | 0.26846257 | DLG4       |
| ILMN_2098126 | -0.7770375 | 0.2672991  | CCL5       |
| ILMN_3220934 | -0.5118439 | 0.26631477 | NCRNA00152 |
| ILMN_2146761 | -0.4733385 | 0.26463622 | FABP5      |
| ILMN_1723486 | -0.8193373 | 0.26113445 | HK2        |
| ILMN_1731644 | -0.4773678 | 0.2600093  | SETDB2     |
| ILMN_2184184 | -0.9364551 | 0.2593097  | ANXA1      |
| ILMN_1765446 | -0.651159  | 0.2588973  | EMP3       |
| ILMN_1736729 | -0.4527157 | 0.25189105 | OAS2       |
| ILMN_1695590 | -1.5135725 | 0.25181645 | ADRB2      |
| ILMN_1731418 | -1.4074057 | 0.25135908 | SP110      |
| ILMN_1737918 | -0.7864966 | 0.25117314 | C1QA       |
| ILMN_1706483 | -1.0443532 | 0.250543   | C1orf116   |
| ILMN_1808657 | -0.6577458 | 0.25034893 | FMO3       |
| ILMN_1677997 | -0.9073625 | 0.2456177  | MAZ        |

|                              |                               |                                                                                                           |
|------------------------------|-------------------------------|-----------------------------------------------------------------------------------------------------------|
|                              | GOTERM_BP_FAT                 | <a href="#">immune response-regulating cell surface receptor signaling pathway</a>                        |
|                              | GOTERM_BP_FAT                 | <a href="#">antigen receptor-mediated signaling pathway</a>                                               |
| <b>Annotation Cluster 8</b>  | <b>Enrichment Score: 3.39</b> |                                                                                                           |
|                              | GOTERM_BP_FAT                 | <a href="#">cell adhesion</a>                                                                             |
|                              | GOTERM_BP_FAT                 | <a href="#">biological adhesion</a>                                                                       |
|                              | SP_PIR_KEYWORDS               | <a href="#">cell adhesion</a>                                                                             |
| <b>Annotation Cluster 9</b>  | <b>Enrichment Score: 3.39</b> |                                                                                                           |
|                              | SP_PIR_KEYWORDS               | <a href="#">glycoprotein</a>                                                                              |
|                              | GOTERM_CC_FAT                 | <a href="#">plasma membrane</a>                                                                           |
|                              | UP_SEQ_FEATURE                | glycosylation site:N-linked (GlcNAc...)                                                                   |
|                              | SP_PIR_KEYWORDS               | <a href="#">membrane</a>                                                                                  |
|                              | UP_SEQ_FEATURE                | topological domain:Cytoplasmic                                                                            |
|                              | UP_SEQ_FEATURE                | topological domain:Extracellular                                                                          |
|                              | SP_PIR_KEYWORDS               | <a href="#">transmembrane</a>                                                                             |
|                              | UP_SEQ_FEATURE                | transmembrane region                                                                                      |
|                              | GOTERM_CC_FAT                 | <a href="#">intrinsic to membrane</a>                                                                     |
|                              | GOTERM_CC_FAT                 | <a href="#">integral to membrane</a>                                                                      |
| <b>Annotation Cluster 10</b> | <b>Enrichment Score: 3.32</b> |                                                                                                           |
|                              | SP_PIR_KEYWORDS               | <a href="#">chemotaxis</a>                                                                                |
|                              | KEGG_PATHWAY                  | <a href="#">Chemokine signaling pathway</a>                                                               |
|                              | GOTERM_BP_FAT                 | <a href="#">taxis</a>                                                                                     |
|                              | GOTERM_BP_FAT                 | <a href="#">chemotaxis</a>                                                                                |
|                              | GOTERM_BP_FAT                 | <a href="#">locomotory behavior</a>                                                                       |
|                              | GOTERM_MF_FAT                 | <a href="#">chemokine activity</a>                                                                        |
|                              | GOTERM_MF_FAT                 | <a href="#">chemokine receptor binding</a>                                                                |
|                              | SP_PIR_KEYWORDS               | <a href="#">inflammatory response</a>                                                                     |
|                              | SP_PIR_KEYWORDS               | <a href="#">cytokine</a>                                                                                  |
|                              | INTERPRO                      | <a href="#">Small chemokine, interleukin-8-like</a>                                                       |
|                              | GOTERM_BP_FAT                 | <a href="#">behavior</a>                                                                                  |
|                              | SMART                         | <a href="#">SCY</a>                                                                                       |
|                              | KEGG_PATHWAY                  | <a href="#">Cytokine-cytokine receptor interaction</a>                                                    |
|                              | GOTERM_MF_FAT                 | <a href="#">cytokine activity</a>                                                                         |
|                              | INTERPRO                      | <a href="#">Small chemokine, C-C group, conserved site</a>                                                |
|                              | PIR_SUPERFAMILY               | PIRSF001950:small inducible chemokine, C/CC types                                                         |
|                              | BBID                          | <a href="#">109.Chemokine families</a>                                                                    |
| <b>Annotation Cluster 11</b> | <b>Enrichment Score: 2.85</b> |                                                                                                           |
|                              | UP_SEQ_FEATURE                | domain:Ig-like V-type 2                                                                                   |
|                              | INTERPRO                      | <a href="#">Immunoglobulin V-set</a>                                                                      |
|                              | UP_SEQ_FEATURE                | domain:Ig-like V-type 1                                                                                   |
| <b>Annotation Cluster 12</b> | <b>Enrichment Score: 2.54</b> |                                                                                                           |
|                              | KEGG_PATHWAY                  | <a href="#">Allograft rejection</a>                                                                       |
|                              | KEGG_PATHWAY                  | <a href="#">Graft-versus-host disease</a>                                                                 |
|                              | UP_SEQ_FEATURE                | domain:Ig-like C1-type                                                                                    |
|                              | KEGG_PATHWAY                  | <a href="#">Type I diabetes mellitus</a>                                                                  |
|                              | KEGG_PATHWAY                  | <a href="#">Viral myocarditis</a>                                                                         |
|                              | INTERPRO                      | <a href="#">Immunoglobulin C1-set</a>                                                                     |
|                              | KEGG_PATHWAY                  | <a href="#">Intestinal immune network for IgA production</a>                                              |
|                              | KEGG_PATHWAY                  | <a href="#">Systemic lupus erythematosus</a>                                                              |
|                              | KEGG_PATHWAY                  | <a href="#">Asthma</a>                                                                                    |
|                              | INTERPRO                      | <a href="#">Immunoglobulin/major histocompatibility complex, conserved site</a>                           |
|                              | SMART                         | <a href="#">IGc1</a>                                                                                      |
|                              | GOTERM_BP_FAT                 | <a href="#">antigen processing and presentation</a>                                                       |
|                              | KEGG_PATHWAY                  | <a href="#">Autoimmune thyroid disease</a>                                                                |
|                              | KEGG_PATHWAY                  | <a href="#">Cell adhesion molecules (CAMs)</a>                                                            |
|                              | KEGG_PATHWAY                  | <a href="#">antigen processing and presentation of peptide or polysaccharide antigen via MHC class II</a> |
|                              | GOTERM_BP_FAT                 | <a href="#">class II</a>                                                                                  |
|                              | GOTERM_CC_FAT                 | <a href="#">MHC protein complex</a>                                                                       |

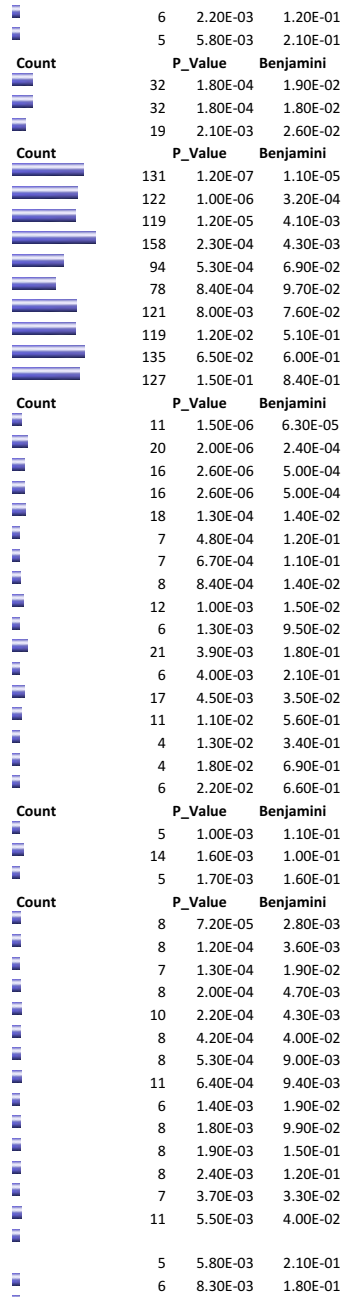

|              |            |            |          |                              |                                                                |              |                |                  |
|--------------|------------|------------|----------|------------------------------|----------------------------------------------------------------|--------------|----------------|------------------|
| ILMN_1753064 | -0.6260933 | 0.24519011 | TTC13    | SP_PIR_KEYWORDS              | <a href="#">mhc ii</a>                                         | 4            | 2.30E-02       | 1.60E-01         |
| ILMN_1655077 | -0.7821897 | 0.24446805 | PRDM1    | PIR_SUPERFAMILY              | PIRSF001991:class II histocompatibility antigen                | 4            | 2.40E-02       | 7.10E-01         |
| ILMN_2148785 | -0.5040276 | 0.24378406 | GBP1     | GOTERM_CC_FAT                | <a href="#">MHC class II protein complex</a>                   | 4            | 2.50E-02       | 4.00E-01         |
| ILMN_1682799 | -1.0445333 | 0.24377693 | STAMBPL1 | KEGG_PATHWAY                 | <a href="#">Antigen processing and presentation</a>            | 7            | 3.60E-02       | 1.80E-01         |
| ILMN_1750246 | -0.6299647 | 0.24340005 | ZBTB1    | GOTERM_MF_FAT                | <a href="#">MHC class II receptor activity</a>                 | 3            | 6.40E-02       | 5.90E-01         |
| ILMN_2203271 | -2.2243528 | 0.24243772 | FPR3     | INTERPRO                     | <a href="#">MHC class II, alpha/beta chain, N-terminal</a>     | 3            | 7.10E-02       | 7.00E-01         |
| ILMN_2131467 | -0.397852  | 0.24238987 | GNAI1    | UP_SEQ_FEATURE               | region of interest:Connecting peptide                          | 3            | 1.80E-01       | 9.90E-01         |
| ILMN_1701195 | -0.8428546 | 0.24176498 | PLA2G7   | <b>Annotation Cluster 13</b> | <b>Enrichment Score: 2.29</b>                                  | <b>Count</b> | <b>P_Value</b> | <b>Benjamini</b> |
| ILMN_2150196 | -0.8684133 | 0.24121656 | LRRC25   | INTERPRO                     | <a href="#">Immunoglobulin-like fold</a>                       | 31           | 8.10E-07       | 5.60E-04         |
| ILMN_1686623 | -1.1544287 | 0.24103889 | CSF1R    | INTERPRO                     | <a href="#">Immunoglobulin-like</a>                            | 29           | 1.10E-06       | 3.70E-04         |
| ILMN_1773079 | -1.0618627 | 0.24067923 | COL3A1   | SP_PIR_KEYWORDS              | <a href="#">Immunoglobulin domain</a>                          | 26           | 8.70E-06       | 2.90E-04         |
| ILMN_1738675 | -0.5899928 | 0.24046308 | PTPN6    | INTERPRO                     | <a href="#">Immunoglobulin subtype</a>                         | 18           | 3.80E-04       | 4.30E-02         |
| ILMN_2145033 | -1.5628619 | 0.23933251 | CCR5     | INTERPRO                     | <a href="#">Immunoglobulin V-set</a>                           | 14           | 1.60E-03       | 1.00E-01         |
| ILMN_2055156 | -0.7168464 | 0.23903461 | PAG1     | UP_SEQ_FEATURE               | domain:Ig-like C2-type 1                                       | 11           | 5.00E-03       | 3.60E-01         |
| ILMN_1668411 | -0.741487  | 0.23653066 | FHL2     | UP_SEQ_FEATURE               | domain:Ig-like C2-type 2                                       | 11           | 5.20E-03       | 3.40E-01         |
| ILMN_2390586 | -0.9880923 | 0.23087709 | SP100    | SMART                        | <a href="#">IG</a>                                             | 18           | 5.80E-03       | 2.20E-01         |
| ILMN_1795158 | -0.4236481 | 0.23035878 | FGR      | UP_SEQ_FEATURE               | domain:Ig-like C2-type 5                                       | 4            | 9.70E-02       | 9.50E-01         |
| ILMN_1781155 | -0.792679  | 0.22834751 | LYN      | UP_SEQ_FEATURE               | domain:Ig-like C2-type 3                                       | 6            | 9.80E-02       | 9.50E-01         |
| ILMN_2148944 | -0.5236613 | 0.22767676 | ADCY4    | INTERPRO                     | <a href="#">Immunoglobulin</a>                                 | 8            | 1.10E-01       | 8.20E-01         |
| ILMN_2355953 | -0.4987555 | 0.22675383 | LILRB4   | UP_SEQ_FEATURE               | domain:Ig-like C2-type 4                                       | 4            | 1.90E-01       | 9.90E-01         |
| ILMN_1769129 | -2.6877906 | 0.22659782 | CCL19    | INTERPRO                     | <a href="#">Immunoglobulin subtype 2</a>                       | 5            | 5.90E-01       | 1.00E+00         |
| ILMN_1654586 | -0.5864834 | 0.22578712 | RASA3    | INTERPRO                     | <a href="#">Immunoglobulin I-set</a>                           | 3            | 7.70E-01       | 1.00E+00         |
| ILMN_2393765 | -3.0009851 | 0.22573021 | IGLL1    | SMART                        | <a href="#">IGc2</a>                                           | 5            | 7.90E-01       | 1.00E+00         |
| ILMN_1800787 | -0.8008962 | 0.22567444 | RFTN1    | <b>Annotation Cluster 14</b> | <b>Enrichment Score: 2.29</b>                                  | <b>Count</b> | <b>P_Value</b> | <b>Benjamini</b> |
| ILMN_1716246 | -1.1581569 | 0.22510645 | FRZB     | INTERPRO                     | <a href="#">Guanylate-binding protein, C-terminal</a>          | 4            | 2.60E-04       | 3.60E-02         |
| ILMN_1803825 | -1.177887  | 0.22443794 | CXCL12   | PIR_SUPERFAMILY              | PIRSF005552:guanine nucleotide-binding protein 1               | 4            | 4.60E-04       | 8.90E-02         |
| ILMN_1748538 | -0.6969305 | 0.22319187 | ALDH1A2  | INTERPRO                     | <a href="#">Guanylate-binding protein, N-terminal</a>          | 4            | 1.20E-03       | 9.60E-02         |
| ILMN_1712505 | -0.6336315 | 0.22281049 | KDEL1C1  | GOTERM_MF_FAT                | <a href="#">GTPase activity</a>                                | 10           | 4.40E-02       | 4.90E-01         |
| ILMN_2262044 | -0.9458075 | 0.22100846 | PARP10   | SP_PIR_KEYWORDS              | <a href="#">prenylation</a>                                    | 4            | 6.00E-01       | 9.40E-01         |
| ILMN_1808405 | -1.3138167 | 0.22031488 | HLA-DQA1 | <b>Annotation Cluster 15</b> | <b>Enrichment Score: 2.26</b>                                  | <b>Count</b> | <b>P_Value</b> | <b>Benjamini</b> |
| ILMN_1672661 | -0.6772578 | 0.21959968 | SP110    | GOTERM_BP_FAT                | <a href="#">mast cell activation</a>                           | 4            | 5.50E-04       | 4.50E-02         |
| ILMN_1751079 | -0.8478336 | 0.21942043 | TAP1     | GOTERM_BP_FAT                | <a href="#">cell activation during immune response</a>         | 6            | 1.10E-03       | 7.20E-02         |
| ILMN_1669703 | -1.0861342 | 0.21830858 | TNK2     | GOTERM_BP_FAT                | <a href="#">leukocyte activation during immune response</a>    | 6            | 1.10E-03       | 7.20E-02         |
| ILMN_2331087 | -0.6249117 | 0.21772788 | MS4A7    | GOTERM_BP_FAT                | <a href="#">myeloid leukocyte activation</a>                   | 6            | 3.30E-03       | 1.60E-01         |
| ILMN_1842448 | -0.6529515 | 0.21661535 | AI866653 | GOTERM_BP_FAT                | <a href="#">mast cell degranulation</a>                        | 3            | 4.70E-03       | 1.90E-01         |
| ILMN_1661594 | -0.6992096 | 0.21564007 | C2orf42  | GOTERM_BP_FAT                | <a href="#">mast cell mediated immunity</a>                    | 3            | 4.70E-03       | 1.90E-01         |
| ILMN_1733579 | -0.8560787 | 0.21515703 | EVI2A    | GOTERM_BP_FAT                | <a href="#">myeloid cell activation during immune response</a> | 4            | 6.80E-03       | 2.20E-01         |
| ILMN_2105919 | -0.5137864 | 0.21502116 | FGF2     | GOTERM_BP_FAT                | <a href="#">leukocyte degranulation</a>                        | 3            | 2.80E-02       | 4.30E-01         |
| ILMN_2344283 | -1.2531308 | 0.21422459 | FMO3     | GOTERM_BP_FAT                | <a href="#">myeloid leukocyte mediated immunity</a>            | 3            | 4.20E-02       | 4.70E-01         |
| ILMN_1705247 | -0.4828205 | 0.21087095 | ACSL5    | GOTERM_BP_FAT                | <a href="#">regulated secretory pathway</a>                    | 3            | 5.90E-02       | 5.50E-01         |
| ILMN_1763452 | -1.3882258 | 0.2101784  | EVI2B    | <b>Annotation Cluster 16</b> | <b>Enrichment Score: 2.26</b>                                  | <b>Count</b> | <b>P_Value</b> | <b>Benjamini</b> |
| ILMN_2049766 | -0.819701  | 0.21005131 | NFE2L3   | UP_SEQ_FEATURE               | glycosylation site:O-linked (Gal...)                           | 5            | 1.80E-05       | 4.10E-03         |
| ILMN_1791447 | -0.6749299 | 0.20970264 | CXCL12   | SP_PIR_KEYWORDS              | <a href="#">triple helix</a>                                   | 7            | 2.90E-05       | 8.80E-04         |
| ILMN_1797001 | -1.04925   | 0.20879143 | DDX58    | SP_PIR_KEYWORDS              | <a href="#">hydroxylysine</a>                                  | 7            | 2.90E-05       | 8.80E-04         |
| ILMN_2066858 | -1.0778518 | 0.20609286 | TNFSF13B | SP_PIR_KEYWORDS              | <a href="#">pyroglutamic acid</a>                              | 8            | 3.20E-05       | 9.10E-04         |
| ILMN_3238525 | -0.840078  | 0.20518312 | CARD17   | GOTERM_MF_FAT                | <a href="#">platelet-derived growth factor binding</a>         | 5            | 6.60E-05       | 3.40E-02         |
| ILMN_1671404 | -0.3086096 | 0.20476213 | SVIL     | SP_PIR_KEYWORDS              | <a href="#">hydroxyproline</a>                                 | 7            | 8.10E-05       | 1.90E-03         |
| ILMN_1771385 | -0.9513072 | 0.2039975  | GBP4     | SP_PIR_KEYWORDS              | <a href="#">trimer</a>                                         | 6            | 1.40E-04       | 2.90E-03         |
| ILMN_2107068 | -0.4971687 | 0.20379758 | HOXA2    | GOTERM_CC_FAT                | <a href="#">collagen</a>                                       | 6            | 9.50E-04       | 3.30E-02         |
| ILMN_1710923 | -0.852091  | 0.20088993 | SLAMF7   | GOTERM_CC_FAT                | <a href="#">fibrillar collagen</a>                             | 4            | 2.00E-03       | 5.10E-02         |
| ILMN_1701877 | -0.7365986 | 0.19854017 | AXL      | SP_PIR_KEYWORDS              | <a href="#">hydroxylation</a>                                  | 7            | 2.90E-03       | 3.20E-02         |
| ILMN_1662026 | -2.3509529 | 0.19770975 | BTK      | SP_PIR_KEYWORDS              | <a href="#">collagen</a>                                       | 8            | 2.90E-03       | 3.10E-02         |
| ILMN_2081682 | -0.3063551 | 0.19752866 | SMAP2    | KEGG_PATHWAY                 | <a href="#">ECM-receptor interaction</a>                       | 9            | 3.20E-03       | 3.10E-02         |
| ILMN_1776723 | -0.6018739 | 0.19542946 | PHF11    | SP_PIR_KEYWORDS              | <a href="#">skin</a>                                           | 3            | 3.80E-03       | 3.80E-02         |
| ILMN_1811301 | -0.5809573 | 0.19494492 | INPP5E   | PIR_SUPERFAMILY              | PIRSF002255:collagen alpha 1(I) chain                          | 3            | 5.60E-03       | 4.30E-01         |
| ILMN_2162860 | -0.6841633 | 0.19357748 | SLFN11   | UP_SEQ_FEATURE               | propeptide:N-terminal propeptide                               | 3            | 5.70E-03       | 3.40E-01         |
| ILMN_1795762 | -1.6215433 | 0.19356228 | PLEK     | KEGG_PATHWAY                 | <a href="#">Focal adhesion</a>                                 | 14           | 6.40E-03       | 4.30E-02         |

| ILMN_ID      | Score      | Gene       | Condition |
|--------------|------------|------------|-----------|
| ILMN_1769118 | -0.6864126 | 0.19338933 | sept-09   |
| ILMN_1775486 | -0.9369748 | 0.19133283 | SSPN      |
| ILMN_2376205 | -1.2679341 | 0.19055454 | LTB       |
| ILMN_1802157 | -0.4378756 | 0.19053373 | THOC1     |
| ILMN_1761733 | -1.1943467 | 0.19034739 | HLA-DMB   |
| ILMN_1766411 | -0.4739769 | 0.19005528 | AP1S2     |
| ILMN_1702301 | -0.8188756 | 0.18990526 | DOCK10    |
| ILMN_2355831 | -0.7947089 | 0.18943101 | FHL2      |
| ILMN_1693009 | -0.6449313 | 0.18806794 | FGL2      |
| ILMN_2335072 | -0.6986206 | 0.18791698 | TAF1C     |
| ILMN_1682428 | -0.4835178 | 0.18789467 | HENMT1    |
| ILMN_1653438 | -0.5087999 | 0.18765485 | PHF14     |
| ILMN_1742307 | -0.6138526 | 0.18763377 | MEST      |
| ILMN_1803560 | -1.0579265 | 0.18705413 | LAT2      |
| ILMN_2196328 | -0.9337432 | 0.18687055 | POSTN     |
| ILMN_1674706 | -0.5913538 | 0.18563332 | MTHFD2    |
| ILMN_1699217 | -0.7707384 | 0.18500535 | C1orf96   |
| ILMN_1653856 | -1.3466251 | 0.18485016 | UBASH3B   |
| ILMN_1701789 | -2.004902  | 0.18479297 | IFIT3     |
| ILMN_1758315 | -1.0181562 | 0.18420744 | SLC9A9    |
| ILMN_1750961 | -0.8616837 | 0.18414715 | TM6SF1    |
| ILMN_1728639 | -0.5478027 | 0.18408255 | FCGR3B    |
| ILMN_1706779 | -0.5501093 | 0.18396571 | LIG1      |
| ILMN_1685680 | -0.7034726 | 0.18370552 | SPATA1    |
| ILMN_2175912 | -0.9459248 | 0.18345703 | ITGB2     |
| ILMN_1738027 | -0.4626849 | 0.18197875 | BRCA1     |
| ILMN_3236858 | -0.5093583 | 0.18181755 | NYNRIN    |
| ILMN_2114568 | -0.8746334 | 0.18175074 | GBP5      |
| ILMN_2373831 | -0.9518257 | 0.18167904 | BTN3A3    |
| ILMN_1674250 | -1.2010549 | 0.1805769  | NCKAP1L   |
| ILMN_1771057 | -0.7285394 | 0.18004651 | XAB2      |
| ILMN_2399523 | -0.495345  | 0.17881615 | JAG2      |
| ILMN_1768482 | -2.152835  | 0.17718779 | CD8A      |
| ILMN_2120273 | -0.5052606 | 0.17538813 | AP1S2     |
| ILMN_2112580 | -0.7201615 | 0.17467757 | FCGR3A    |
| ILMN_1797342 | -0.6990012 | 0.17328602 | FNBP1     |
| ILMN_1682761 | -0.5960339 | 0.17276324 | C17orf87  |
| ILMN_1684352 | -0.5583657 | 0.17271927 | TRIM45    |
| ILMN_3307841 | -1.1468112 | 0.17166331 | AGR2      |
| ILMN_2415144 | -1.261158  | 0.17139485 | SP110     |
| ILMN_1717261 | -0.5074661 | 0.17112969 | HLA-DRB1  |
| ILMN_2123743 | -0.851247  | 0.17013052 | FCER1G    |
| ILMN_2320513 | -0.6221451 | 0.1697949  | APBB3     |
| ILMN_1672611 | -1.1591105 | 0.16951554 | CDH11     |
| ILMN_1750400 | -0.8579902 | 0.16903764 | C19orf66  |
| ILMN_1677608 | -0.9510541 | 0.16882162 | NEUROD4   |
| ILMN_2109708 | -1.0622737 | 0.16779476 | TYMP      |
| ILMN_2053527 | -1.2896768 | 0.16774197 | PARP9     |
| ILMN_1854031 | -1.0422922 | 0.16767006 | CD729290  |
| ILMN_1716552 | -0.3899185 | 0.16749883 | ENAH      |
| ILMN_1751572 | -0.9353575 | 0.16673219 | TLE1      |
| ILMN_1790529 | -1.4788342 | 0.16615602 | LUM       |
| ILMN_2163873 | -0.9824466 | 0.16482532 | FNDC1     |
| ILMN_1693766 | -0.5237026 | 0.16480169 | CEP135    |
| ILMN_1781373 | -1.2364535 | 0.16454612 | IFIH1     |
| ILMN_1794594 | -0.4929295 | 0.16383012 | RASGRP2   |
| ILMN_1697377 | -0.733766  | 0.16293058 | ANKRD36B  |

| Annotation Cluster    | Enrichment Score       | Gene            | Condition                                    |
|-----------------------|------------------------|-----------------|----------------------------------------------|
| Annotation Cluster 17 | Enrichment Score: 2.14 | INTERPRO        | Collagen triple helix repeat                 |
|                       |                        | GOTERM_BP_FAT   | extracellular matrix organization            |
|                       |                        | SP_PIR_KEYWORDS | extracellular matrix                         |
|                       |                        | UP_SEQ_FEATURE  | propeptide:C-terminal propeptide             |
|                       |                        | UP_SEQ_FEATURE  | region of interest:Triple-helical region     |
|                       |                        | SP_PIR_KEYWORDS | Ehlers-Danlos syndrome                       |
|                       |                        | UP_SEQ_FEATURE  | domain:Fibrillar collagen NC1                |
|                       |                        | INTERPRO        | Fibrillar collagen, C-terminal               |
|                       |                        | GOTERM_BP_FAT   | collagen fibril organization                 |
|                       |                        | GOTERM_BP_FAT   | skin development                             |
|                       |                        | GOTERM_MF_FAT   | growth factor binding                        |
|                       |                        | GOTERM_BP_FAT   | extracellular structure organization         |
|                       |                        | SMART           | COLF1                                        |
|                       |                        | GOTERM_MF_FAT   | extracellular matrix structural constituent  |
|                       |                        | GOTERM_CC_FAT   | extracellular matrix                         |
|                       |                        | GOTERM_CC_FAT   | extracellular matrix part                    |
|                       |                        | GOTERM_CC_FAT   | proteinaceous extracellular matrix           |
|                       |                        | GOTERM_BP_FAT   | odontogenesis                                |
|                       |                        | GOTERM_BP_FAT   | epidermis development                        |
|                       |                        | GOTERM_BP_FAT   | ectoderm development                         |
|                       |                        | GOTERM_MF_FAT   | structural molecule activity                 |
| Annotation Cluster 18 | Enrichment Score: 2    | SP_PIR_KEYWORDS | trimer                                       |
|                       |                        | UP_SEQ_FEATURE  | domain:VWFC                                  |
|                       |                        | INTERPRO        | von Willebrand factor, type C                |
|                       |                        | SMART           | VWC                                          |
| Annotation Cluster 19 | Enrichment Score: 1.99 | GOTERM_MF_FAT   | identical protein binding                    |
|                       |                        | GOTERM_MF_FAT   | protein dimerization activity                |
|                       |                        | GOTERM_MF_FAT   | protein homodimerization activity            |
| Annotation Cluster 20 | Enrichment Score: 1.94 | INTERPRO        | Pleckstrin homology-type                     |
|                       |                        | INTERPRO        | Pleckstrin homology                          |
|                       |                        | GOTERM_MF_FAT   | GTPase regulator activity                    |
|                       |                        | GOTERM_MF_FAT   | nucleoside-triphosphatase regulator activity |
|                       |                        | UP_SEQ_FEATURE  | domain:PH                                    |
|                       |                        | GOTERM_MF_FAT   | GTPase activator activity                    |
|                       |                        | SMART           | PH                                           |
|                       |                        | GOTERM_MF_FAT   | enzyme activator activity                    |
|                       |                        | SP_PIR_KEYWORDS | GTPase activation                            |
| Annotation Cluster 21 | Enrichment Score: 1.93 | GOTERM_BP_FAT   | circulatory system process                   |
|                       |                        | GOTERM_BP_FAT   | blood circulation                            |
|                       |                        | GOTERM_BP_FAT   | regulation of blood pressure                 |
| Annotation Cluster 22 | Enrichment Score: 1.87 | SP_PIR_KEYWORDS | SH2 domain                                   |
|                       |                        | INTERPRO        | SH2 motif                                    |
|                       |                        | SMART           | SH2                                          |
|                       |                        | UP_SEQ_FEATURE  | domain:SH2                                   |
|                       |                        | KEGG_PATHWAY    | Jak-STAT signaling pathway                   |
| Annotation Cluster 23 | Enrichment Score: 1.82 | SP_PIR_KEYWORDS | myristylation                                |
|                       |                        | SP_PIR_KEYWORDS | blocked amino end                            |
|                       |                        | SP_PIR_KEYWORDS | thiolester bond                              |
|                       |                        | GOTERM_BP_FAT   | response to organic substance                |
|                       |                        | GOTERM_BP_FAT   | response to hormone stimulus                 |

| Count | P_Value  | Benjamini |
|-------|----------|-----------|
| 7     | 6.80E-03 | 2.40E-01  |
| 8     | 8.20E-03 | 2.50E-01  |
| 12    | 9.00E-03 | 8.10E-02  |
| 3     | 1.00E-02 | 4.80E-01  |
| 4     | 1.00E-02 | 4.70E-01  |
| 3     | 1.90E-02 | 1.40E-01  |
| 3     | 1.90E-02 | 5.60E-01  |
| 3     | 2.00E-02 | 4.20E-01  |
| 4     | 2.60E-02 | 4.30E-01  |
| 4     | 2.60E-02 | 4.30E-01  |
| 7     | 2.80E-02 | 4.60E-01  |
| 9     | 2.80E-02 | 4.30E-01  |
| 3     | 3.20E-02 | 4.30E-01  |
| 6     | 4.10E-02 | 4.90E-01  |
| 14    | 4.20E-02 | 5.30E-01  |
| 7     | 4.50E-02 | 5.30E-01  |
| 13    | 5.20E-02 | 5.50E-01  |
| 4     | 1.20E-01 | 7.10E-01  |
| 7     | 2.20E-01 | 8.60E-01  |
| 7     | 2.80E-01 | 9.00E-01  |
| 13    | 7.40E-01 | 1.00E+00  |
| 6     | 1.40E-04 | 2.90E-03  |
| 4     | 5.20E-03 | 3.50E-01  |
| 4     | 4.60E-02 | 5.70E-01  |
| 4     | 8.60E-02 | 6.70E-01  |
| 27    | 1.90E-03 | 1.80E-01  |
| 21    | 1.60E-02 | 5.10E-01  |
| 14    | 3.30E-02 | 4.70E-01  |
| 19    | 4.30E-05 | 9.70E-03  |
| 14    | 4.00E-03 | 1.60E-01  |
| 17    | 1.70E-02 | 4.90E-01  |
| 17    | 2.00E-02 | 4.60E-01  |
| 11    | 2.10E-02 | 5.80E-01  |
| 11    | 2.40E-02 | 4.50E-01  |
| 14    | 3.00E-02 | 4.40E-01  |
| 14    | 3.40E-02 | 4.60E-01  |
| 8     | 4.00E-02 | 2.40E-01  |
| 12    | 2.90E-03 | 1.40E-01  |
| 12    | 2.90E-03 | 1.40E-01  |
| 5     | 1.80E-01 | 8.10E-01  |
| 9     | 1.70E-03 | 2.40E-02  |
| 9     | 1.80E-03 | 1.00E-01  |
| 9     | 8.40E-03 | 2.50E-01  |
| 7     | 1.30E-02 | 5.10E-01  |
| 5     | 6.80E-01 | 9.30E-01  |
| 5     | 7.30E-03 | 7.10E-02  |
| 7     | 1.00E-02 | 8.60E-02  |
| 4     | 3.40E-02 | 2.10E-01  |
| 30    | 1.30E-03 | 8.20E-02  |
| 16    | 1.70E-02 | 3.70E-01  |

|              |            |            |          |                              |                                                                                             |              |                |                  |
|--------------|------------|------------|----------|------------------------------|---------------------------------------------------------------------------------------------|--------------|----------------|------------------|
| ILMN_2053345 | -1.0464411 | 0.16142471 | KCNT2    | GOTERM_BP_FAT                | <a href="#">response to endogenous stimulus</a>                                             | 16           | 3.60E-02       | 4.40E-01         |
| ILMN_2348788 | -0.8400175 | 0.16100022 | CD44     | GOTERM_BP_FAT                | <a href="#">response to steroid hormone stimulus</a>                                        | 9            | 6.30E-02       | 5.70E-01         |
| ILMN_2129927 | -0.4411718 | 0.16062467 | EXT1     | <b>Annotation Cluster 24</b> | <b>Enrichment Score: 1.82</b>                                                               | <b>Count</b> | <b>P_Value</b> | <b>Benjamini</b> |
| ILMN_1754894 | -0.6684889 | 0.16053428 | C1orf162 | GOTERM_BP_FAT                | <a href="#">immune effector process</a>                                                     | 13           | 4.20E-05       | 5.10E-03         |
| ILMN_1671565 | -0.8811511 | 0.15950754 | RNASET2  | GOTERM_BP_FAT                | <a href="#">leukocyte mediated immunity</a>                                                 | 9            | 6.20E-04       | 4.70E-02         |
| ILMN_1665738 | -0.5216289 | 0.15925722 | FLI1     | GOTERM_BP_FAT                | <a href="#">lymphocyte mediated immunity</a>                                                | 6            | 1.90E-02       | 4.00E-01         |
| ILMN_1777325 | -0.8521843 | 0.15826768 | STAT1    | GOTERM_BP_FAT                | <a href="#">adaptive immune response</a>                                                    | 5            | 9.10E-02       | 6.50E-01         |
| ILMN_1858599 | -0.3757296 | 0.15665687 | RBM43    | GOTERM_BP_FAT                | <a href="#">adaptive immune response based on somatic recombination of immune receptors</a> | 5            | 9.10E-02       | 6.50E-01         |
| ILMN_1803429 | -1.1652212 | 0.15593497 | CD44     | GOTERM_BP_FAT                | <a href="#">built from immunoglobulin superfamily domains</a>                               | 4            | 1.30E-01       | 7.30E-01         |
| ILMN_1690105 | -1.3125963 | 0.15538809 | STAT1    | GOTERM_BP_FAT                | <a href="#">B cell mediated immunity</a>                                                    | 3            | 3.40E-01       | 9.30E-01         |
| ILMN_1698551 | -0.4980893 | 0.1544606  | RCN1     | <b>Annotation Cluster 25</b> | <b>Enrichment Score: 1.8</b>                                                                | <b>Count</b> | <b>P_Value</b> | <b>Benjamini</b> |
| ILMN_1760027 | -0.6957563 | 0.15445444 | WAS      | GOTERM_BP_FAT                | <a href="#">response to defenses of other organism during symbiotic interaction</a>         | 3            | 1.60E-02       | 3.60E-01         |
| ILMN_1689518 | -0.6729684 | 0.15435107 | PECAM1   | GOTERM_BP_FAT                | <a href="#">response to host defenses</a>                                                   | 3            | 1.60E-02       | 3.60E-01         |
| ILMN_1752046 | -0.8322395 | 0.15407388 | SH2B3    | GOTERM_BP_FAT                | <a href="#">response to host</a>                                                            | 3            | 1.60E-02       | 3.60E-01         |
| ILMN_1808590 | -1.0341556 | 0.1538482  | GUCY1A3  | <b>Annotation Cluster 26</b> | <b>Enrichment Score: 1.78</b>                                                               | <b>Count</b> | <b>P_Value</b> | <b>Benjamini</b> |
| ILMN_1667947 | -0.5844314 | 0.15268582 | NPY1R    | GOTERM_BP_FAT                | <a href="#">exocytosis</a>                                                                  | 9            | 4.00E-03       | 1.80E-01         |
| ILMN_1797425 | -0.5200506 | 0.15247124 | DDX55    | GOTERM_BP_FAT                | <a href="#">secretion by cell</a>                                                           | 12           | 6.40E-03       | 2.20E-01         |
| ILMN_3252608 | -0.7166695 | 0.15206487 | HCRP1    | GOTERM_BP_FAT                | <a href="#">secretion</a>                                                                   | 13           | 3.50E-02       | 4.50E-01         |
| ILMN_1699496 | -0.3706721 | 0.15120575 | PHF21A   | GOTERM_BP_FAT                | <a href="#">vesicle-mediated transport</a>                                                  | 19           | 8.90E-02       | 6.50E-01         |
| ILMN_2309848 | -1.0085205 | 0.15017693 | FXYD5    | <b>Annotation Cluster 27</b> | <b>Enrichment Score: 1.76</b>                                                               | <b>Count</b> | <b>P_Value</b> | <b>Benjamini</b> |
| ILMN_1726565 | -0.4903091 | 0.15010406 | PIK3R2   | GOTERM_BP_FAT                | <a href="#">regulation of cytokine production</a>                                           | 12           | 2.30E-03       | 1.20E-01         |
| ILMN_2401770 | -0.6743532 | 0.14875394 | PHF14    | GOTERM_BP_FAT                | <a href="#">positive regulation of multicellular organismal process</a>                     | 11           | 4.50E-02       | 4.80E-01         |
| ILMN_1714523 | -0.6782292 | 0.14785935 | HEPH     | GOTERM_BP_FAT                | <a href="#">positive regulation of cytokine production</a>                                  | 6            | 4.90E-02       | 5.10E-01         |
| ILMN_2376723 | -1.4681809 | 0.14697123 | CDKN2B   | <b>Annotation Cluster 28</b> | <b>Enrichment Score: 1.65</b>                                                               | <b>Count</b> | <b>P_Value</b> | <b>Benjamini</b> |
| ILMN_1811313 | -0.6984525 | 0.1466987  | SLIT3    | GOTERM_BP_FAT                | <a href="#">antigen processing and presentation</a>                                         | 8            | 2.40E-03       | 1.20E-01         |
| ILMN_3259146 | -0.9624002 | 0.14500356 | BST2     | GOTERM_BP_FAT                | <a href="#">antigen processing and presentation of exogenous peptide antigen</a>            | 3            | 2.30E-02       | 4.20E-01         |
| ILMN_1713751 | -0.9840141 | 0.14473715 | ADAM19   | GOTERM_BP_FAT                | <a href="#">antigen processing and presentation of exogenous antigen</a>                    | 3            | 3.70E-02       | 4.50E-01         |
| ILMN_1699931 | -1.003425  | 0.14460169 | HCST     | GOTERM_BP_FAT                | <a href="#">antigen processing and presentation of peptide antigen</a>                      | 3            | 1.30E-01       | 7.30E-01         |
| ILMN_1725678 | -1.1343282 | 0.14421207 | GFRA1    | <b>Annotation Cluster 29</b> | <b>Enrichment Score: 1.63</b>                                                               | <b>Count</b> | <b>P_Value</b> | <b>Benjamini</b> |
| ILMN_1704665 | -0.68296   | 0.14387353 | GPM6B    | GOTERM_BP_FAT                | <a href="#">positive regulation of cytokine biosynthetic process</a>                        | 6            | 4.00E-03       | 1.80E-01         |
| ILMN_1742544 | -0.6991372 | 0.14363457 | MEF2C    | GOTERM_BP_FAT                | <a href="#">regulation of cytokine biosynthetic process</a>                                 | 7            | 5.80E-03       | 2.10E-01         |
| ILMN_1659075 | -0.8373866 | 0.14355    | HLA-DOA  | GOTERM_BP_FAT                | <a href="#">positive regulation of interleukin-2 biosynthetic process</a>                   | 3            | 3.20E-02       | 4.40E-01         |
| ILMN_1697409 | -0.5747517 | 0.14324132 | TNFRSF14 | GOTERM_BP_FAT                | <a href="#">regulation of interleukin-2 biosynthetic process</a>                            | 3            | 6.50E-02       | 5.70E-01         |
| ILMN_1810836 | -0.5323594 | 0.1430238  | PDE5A    | GOTERM_BP_FAT                | <a href="#">regulation of interleukin-2 production</a>                                      | 3            | 1.40E-01       | 7.60E-01         |
| ILMN_1897405 | -0.4541245 | 0.1429059  | CA420307 | <b>Annotation Cluster 30</b> | <b>Enrichment Score: 1.63</b>                                                               | <b>Count</b> | <b>P_Value</b> | <b>Benjamini</b> |
| ILMN_2103761 | -0.32567   | 0.14212725 | TLE4     | SP_PIR_KEYWORDS              | <a href="#">gtp-binding</a>                                                                 | 14           | 1.50E-02       | 1.20E-01         |
| ILMN_1805842 | -0.3127734 | 0.14195496 | FHL1     | UP_SEQ_FEATURE               | nucleotide phosphate-binding region:GTP                                                     | 13           | 1.60E-02       | 5.40E-01         |
| ILMN_1694325 | -0.6372663 | 0.14186426 | NFIX     | GOTERM_MF_FAT                | <a href="#">guanyl ribonucleotide binding</a>                                               | 16           | 2.20E-02       | 4.50E-01         |
| ILMN_1735764 | -0.6439887 | 0.14098056 | HTR2B    | GOTERM_MF_FAT                | <a href="#">guanyl nucleotide binding</a>                                                   | 16           | 2.20E-02       | 4.50E-01         |
| ILMN_1790149 | -0.9141578 | 0.14082532 | HGF      | GOTERM_MF_FAT                | <a href="#">GTP binding</a>                                                                 | 15           | 3.60E-02       | 4.60E-01         |
| ILMN_1779324 | -1.1017444 | 0.14040168 | GZMA     | GOTERM_MF_FAT                | <a href="#">GTPase activity</a>                                                             | 10           | 4.40E-02       | 4.90E-01         |
| ILMN_2115005 | -1.0511112 | 0.13994657 | FGD2     | <b>Annotation Cluster 31</b> | <b>Enrichment Score: 1.62</b>                                                               | <b>Count</b> | <b>P_Value</b> | <b>Benjamini</b> |
| ILMN_1764571 | -0.7244104 | 0.13976014 | ARHGAP23 | GOTERM_BP_FAT                | <a href="#">cell motion</a>                                                                 | 22           | 2.00E-03       | 1.10E-01         |
| ILMN_1754249 | -1.7247378 | 0.13942018 | TARP     | GOTERM_BP_FAT                | <a href="#">localization of cell</a>                                                        | 14           | 1.90E-02       | 3.90E-01         |
| ILMN_1796409 | -1.4578474 | 0.1390564  | C1QB     | GOTERM_BP_FAT                | <a href="#">cell motility</a>                                                               | 14           | 1.90E-02       | 3.90E-01         |
| ILMN_1768551 | -0.7304808 | 0.13891879 | PATL2    | GOTERM_BP_FAT                | <a href="#">cell migration</a>                                                              | 13           | 2.00E-02       | 4.00E-01         |
| ILMN_2061565 | -0.8066601 | 0.13852021 | PLCH2    | GOTERM_BP_FAT                | <a href="#">leukocyte migration</a>                                                         | 5            | 3.70E-02       | 4.50E-01         |
| ILMN_1653028 | -0.7519424 | 0.1373429  | COL4A1   | GOTERM_BP_FAT                | <a href="#">neuron development</a>                                                          | 10           | 3.40E-01       | 9.30E-01         |
| ILMN_2255133 | -2.1671016 | 0.13648851 | BCL11A   | <b>Annotation Cluster 32</b> | <b>Enrichment Score: 1.62</b>                                                               | <b>Count</b> | <b>P_Value</b> | <b>Benjamini</b> |
| ILMN_1796629 | -0.806825  | 0.13480131 | EDNRA    | GOTERM_BP_FAT                | <a href="#">skeletal system development</a>                                                 | 15           | 1.10E-02       | 3.10E-01         |
| ILMN_3252556 | -0.9037436 | 0.13330415 | CARD16   | GOTERM_BP_FAT                | <a href="#">osteoblast differentiation</a>                                                  | 5            | 1.40E-02       | 3.30E-01         |
| ILMN_1748473 | -0.7021659 | 0.13273199 | GIMAP4   | GOTERM_BP_FAT                | <a href="#">ossification</a>                                                                | 8            | 1.40E-02       | 3.40E-01         |
| ILMN_2388547 | -1.5174031 | 0.13248418 | EPST11   | GOTERM_BP_FAT                | <a href="#">bone development</a>                                                            | 8            | 1.90E-02       | 3.90E-01         |
| ILMN_1818617 | -0.9279863 | 0.13082033 | AL133627 | GOTERM_BP_FAT                | <a href="#">biomineral formation</a>                                                        | 3            | 2.00E-01       | 8.30E-01         |
| ILMN_1668374 | -0.4292723 | 0.12997523 | ITGB5    | <b>Annotation Cluster 33</b> | <b>Enrichment Score: 1.61</b>                                                               | <b>Count</b> | <b>P_Value</b> | <b>Benjamini</b> |
| ILMN_1804571 | -0.5105165 | 0.1295662  | ZKSCAN4  | UP_SEQ_FEATURE               | repeat:HAT 5                                                                                | 3            | 1.90E-02       | 5.60E-01         |

|              |            |            |           |
|--------------|------------|------------|-----------|
| ILMN_1848095 | -0.8107949 | 0.12893517 | NA        |
| ILMN_1695640 | -1.2297163 | 0.12878244 | PTPN22    |
| ILMN_1682165 | -0.5414724 | 0.12867746 | NT5C2     |
| ILMN_2222688 | -0.4617698 | 0.12545523 | TMSB4X    |
| ILMN_3222425 | -0.4439984 | 0.12462959 | LOC729852 |
| ILMN_1768394 | -0.2999259 | 0.12444508 | ARPC5     |
| ILMN_1814022 | -0.4016976 | 0.12436828 | NR1H3     |
| ILMN_3238116 | -0.571442  | 0.12429227 | NBPF11    |
| ILMN_1711383 | -0.4462715 | 0.12396342 | STK4      |
| ILMN_1812926 | -0.5183303 | 0.12353233 | ANTXR2    |
| ILMN_1805448 | -0.4803053 | 0.12333091 | EPB41L2   |
| ILMN_1656111 | -0.3010579 | 0.12267488 | MYLIP     |
| ILMN_1752520 | -0.6901116 | 0.12224111 | SLFN11    |
| ILMN_1791873 | -0.6042855 | 0.12214205 | COG1      |
| ILMN_1690921 | -0.475829  | 0.12163639 | STAT2     |
| ILMN_1737833 | -0.5696403 | 0.12110119 | ATN1      |
| ILMN_2326509 | -2.0144005 | 0.120608   | CASP1     |
| ILMN_2208413 | -1.40638   | 0.1202912  | ARHGAP15  |
| ILMN_1727402 | -0.9682615 | 0.11974773 | HCLS1     |
| ILMN_1711617 | -0.8764327 | 0.11954744 | GMFG      |
| ILMN_1777998 | -0.769028  | 0.11922558 | ARHGAP25  |
| ILMN_1662932 | -1.3524692 | 0.11833018 | LCP1      |
| ILMN_1815154 | -0.3131096 | 0.11772004 | MYH10     |
| ILMN_1739541 | -0.5683731 | 0.11725833 | NMI       |
| ILMN_1815673 | -0.8984177 | 0.11664414 | DKK3      |
| ILMN_1813753 | -0.8199365 | 0.11578794 | PTN       |
| ILMN_2364521 | -0.8218051 | 0.11534408 | AXL       |
| ILMN_1663080 | -1.0312574 | 0.11457998 | LFNG      |
| ILMN_1803423 | -0.8187965 | 0.11438009 | ARHGEP6   |
| ILMN_1738832 | -0.9569222 | 0.11290038 | SACS      |
| ILMN_1747968 | -0.5250922 | 0.11259931 | RBM33     |
| ILMN_1718063 | -0.3632585 | 0.11231238 | LIPA      |
| ILMN_1698419 | -0.3359468 | 0.1099484  | NCOR2     |
| ILMN_3300663 | -0.4206458 | 0.10986987 | SLC35E2B  |
| ILMN_2347805 | -0.4750857 | 0.10956416 | EXOC1     |
| ILMN_2229877 | -0.8076528 | 0.10956222 | PCDH18    |
| ILMN_1810910 | -0.8282412 | 0.10938713 | CFH       |
| ILMN_2077406 | -0.7479565 | 0.10932532 | CCDC18    |
| ILMN_3245625 | -0.3613911 | 0.10917917 | RFK7      |
| ILMN_1728478 | -0.4733229 | 0.10900313 | CXCL16    |
| ILMN_1806790 | -0.5863853 | 0.10892174 | ROBO1     |
| ILMN_2253732 | -0.8138144 | 0.10890111 | ST8SIA4   |
| ILMN_3240586 | -0.4137484 | 0.10812488 | PLD6      |
| ILMN_3242725 | -0.5643714 | 0.10779354 | KIF26A    |
| ILMN_2246328 | -1.1970055 | 0.10777731 | PTPN22    |
| ILMN_1705442 | -0.6908666 | 0.10772623 | CMTM3     |
| ILMN_1733538 | -0.8262795 | 0.10733758 | RGS10     |
| ILMN_3243185 | -0.5303395 | 0.10715491 | RERGL     |
| ILMN_1795930 | -0.8828546 | 0.10697748 | PTGER4    |
| ILMN_1802109 | -0.6104525 | 0.10639039 | KLHL29    |
| ILMN_1665686 | -0.5991011 | 0.10587843 | FAM38B    |
| ILMN_1761941 | -0.5115597 | 0.1056436  | FAM198B   |
| ILMN_1683494 | -0.6096175 | 0.10531268 | TMEM154   |
| ILMN_1655595 | -0.3709378 | 0.10528863 | SERPINE2  |
| ILMN_2317581 | -0.6959561 | 0.10484695 | SHANK3    |
| ILMN_1776213 | -0.681404  | 0.10361286 | RGMB      |

|                              |                               |                 |                                                              |
|------------------------------|-------------------------------|-----------------|--------------------------------------------------------------|
|                              |                               | UP_SEQ_FEATURE  | repeat:HAT 4                                                 |
|                              |                               | UP_SEQ_FEATURE  | repeat:HAT 3                                                 |
|                              |                               | UP_SEQ_FEATURE  | repeat:HAT 1                                                 |
|                              |                               | UP_SEQ_FEATURE  | repeat:HAT 2                                                 |
| <b>Annotation Cluster 34</b> | <b>Enrichment Score: 1.6</b>  |                 |                                                              |
|                              |                               | SP_PIR_KEYWORDS | <a href="#">LIM domain</a>                                   |
|                              |                               | INTERPRO        | <a href="#">Zinc finger, LIM-type</a>                        |
|                              |                               | UP_SEQ_FEATURE  | domain:LIM zinc-binding 2                                    |
|                              |                               | UP_SEQ_FEATURE  | domain:LIM zinc-binding 1                                    |
|                              |                               | SMART           | <a href="#">LIM</a>                                          |
|                              |                               | UP_SEQ_FEATURE  | domain:LIM zinc-binding 3                                    |
| <b>Annotation Cluster 35</b> | <b>Enrichment Score: 1.58</b> |                 |                                                              |
|                              |                               | SP_PIR_KEYWORDS | <a href="#">heparin-binding</a>                              |
|                              |                               | GOTERM_MF_FAT   | <a href="#">glycosaminoglycan binding</a>                    |
|                              |                               | GOTERM_MF_FAT   | <a href="#">polysaccharide binding</a>                       |
|                              |                               | GOTERM_MF_FAT   | <a href="#">pattern binding</a>                              |
|                              |                               | GOTERM_MF_FAT   | <a href="#">heparin binding</a>                              |
|                              |                               | GOTERM_MF_FAT   | <a href="#">carbohydrate binding</a>                         |
| <b>Annotation Cluster 36</b> | <b>Enrichment Score: 1.56</b> |                 |                                                              |
|                              |                               | GOTERM_BP_FAT   | <a href="#">regulation of programmed cell death</a>          |
|                              |                               | GOTERM_BP_FAT   | <a href="#">regulation of cell death</a>                     |
|                              |                               | GOTERM_BP_FAT   | <a href="#">induction of apoptosis</a>                       |
|                              |                               | GOTERM_BP_FAT   | <a href="#">induction of programmed cell death</a>           |
|                              |                               | GOTERM_BP_FAT   | <a href="#">positive regulation of apoptosis</a>             |
|                              |                               | GOTERM_BP_FAT   | <a href="#">positive regulation of programmed cell death</a> |
|                              |                               | GOTERM_BP_FAT   | <a href="#">positive regulation of cell death</a>            |
|                              |                               | GOTERM_BP_FAT   | <a href="#">regulation of apoptosis</a>                      |
| <b>Annotation Cluster 37</b> | <b>Enrichment Score: 1.55</b> |                 |                                                              |
|                              |                               | INTERPRO        | <a href="#">Zinc finger, PHD-type</a>                        |
|                              |                               | INTERPRO        | <a href="#">Zinc finger, PHD-type, conserved site</a>        |
|                              |                               | INTERPRO        | <a href="#">Zinc finger, PHD-finger</a>                      |
|                              |                               | SMART           | <a href="#">PHD</a>                                          |
|                              |                               | UP_SEQ_FEATURE  | zinc finger region:PHD-type                                  |
|                              |                               | INTERPRO        | <a href="#">Zinc finger, RING-type</a>                       |
|                              |                               | SMART           | <a href="#">RING</a>                                         |
| <b>Annotation Cluster 38</b> | <b>Enrichment Score: 1.53</b> |                 |                                                              |
|                              |                               | SP_PIR_KEYWORDS | <a href="#">cytoskeleton</a>                                 |
|                              |                               | GOTERM_MF_FAT   | <a href="#">cytoskeletal protein binding</a>                 |
|                              |                               | SP_PIR_KEYWORDS | <a href="#">actin-binding</a>                                |
|                              |                               | GOTERM_MF_FAT   | <a href="#">actin binding</a>                                |
|                              |                               | GOTERM_MF_FAT   | <a href="#">actin filament binding</a>                       |
|                              |                               | GOTERM_CC_FAT   | <a href="#">actin cytoskeleton</a>                           |
| <b>Annotation Cluster 39</b> | <b>Enrichment Score: 1.52</b> |                 |                                                              |
|                              |                               | INTERPRO        | <a href="#">Bromodomain</a>                                  |
|                              |                               | SMART           | <a href="#">BROMO</a>                                        |
|                              |                               | INTERPRO        | <a href="#">Bromodomain, conserved site</a>                  |
|                              |                               | SP_PIR_KEYWORDS | <a href="#">bromodomain</a>                                  |
|                              |                               | UP_SEQ_FEATURE  | domain:Bromo                                                 |
| <b>Annotation Cluster 40</b> | <b>Enrichment Score: 1.52</b> |                 |                                                              |
|                              |                               | GOTERM_BP_FAT   | <a href="#">integrin-mediated signaling pathway</a>          |
|                              |                               | INTERPRO        | <a href="#">von Willebrand factor, type A</a>                |
|                              |                               | GOTERM_CC_FAT   | <a href="#">integrin complex</a>                             |
|                              |                               | SP_PIR_KEYWORDS | <a href="#">integrin</a>                                     |
|                              |                               | SMART           | <a href="#">VWA</a>                                          |
|                              |                               | UP_SEQ_FEATURE  | domain:VWFA                                                  |
| <b>Annotation Cluster 41</b> | <b>Enrichment Score: 1.5</b>  |                 |                                                              |

| Count | P_Value  | Benjamini |
|-------|----------|-----------|
| 3     | 2.30E-02 | 5.90E-01  |
| 3     | 2.70E-02 | 6.40E-01  |
| 3     | 2.70E-02 | 6.40E-01  |
| 3     | 2.70E-02 | 6.40E-01  |
| 6     | 1.30E-02 | 1.10E-01  |
| 6     | 1.60E-02 | 3.60E-01  |
| 5     | 1.80E-02 | 5.30E-01  |
| 5     | 1.80E-02 | 5.30E-01  |
| 6     | 4.20E-02 | 4.90E-01  |
| 3     | 8.80E-02 | 9.50E-01  |
| 6     | 9.40E-03 | 8.20E-02  |
| 9     | 1.20E-02 | 5.00E-01  |
| 9     | 2.00E-02 | 4.50E-01  |
| 9     | 2.00E-02 | 4.50E-01  |
| 7     | 2.60E-02 | 4.60E-01  |
| 11    | 2.60E-01 | 9.10E-01  |
| 28    | 2.20E-02 | 4.10E-01  |
| 28    | 2.30E-02 | 4.20E-01  |
| 14    | 2.60E-02 | 4.30E-01  |
| 14    | 2.60E-02 | 4.20E-01  |
| 17    | 3.00E-02 | 4.40E-01  |
| 17    | 3.10E-02 | 4.40E-01  |
| 17    | 3.30E-02 | 4.40E-01  |
| 27    | 3.30E-02 | 4.40E-01  |
| 8     | 2.20E-03 | 1.00E-01  |
| 8     | 2.70E-03 | 1.10E-01  |
| 7     | 7.20E-03 | 2.40E-01  |
| 8     | 9.00E-03 | 2.30E-01  |
| 4     | 8.60E-02 | 9.50E-01  |
| 7     | 5.50E-01 | 1.00E+00  |
| 7     | 7.90E-01 | 1.00E+00  |
| 23    | 8.60E-03 | 7.90E-02  |
| 20    | 1.60E-02 | 5.20E-01  |
| 11    | 2.60E-02 | 1.80E-01  |
| 14    | 2.80E-02 | 4.70E-01  |
| 5     | 2.90E-02 | 4.50E-01  |
| 9     | 2.50E-01 | 9.10E-01  |
| 5     | 8.20E-03 | 2.50E-01  |
| 5     | 2.00E-02 | 3.90E-01  |
| 4     | 3.50E-02 | 5.60E-01  |
| 4     | 4.20E-02 | 2.40E-01  |
| 3     | 1.10E-01 | 9.50E-01  |
| 7     | 4.40E-03 | 1.80E-01  |
| 6     | 2.10E-02 | 4.30E-01  |
| 4     | 2.50E-02 | 4.00E-01  |
| 4     | 4.80E-02 | 2.60E-01  |
| 6     | 5.50E-02 | 5.60E-01  |
| 4     | 1.30E-01 | 9.70E-01  |
| Count | P_Value  | Benjamini |

| Gene ID      | Score 1    | Score 2    | Score 3   | Gene Name                                                  | Category                                                                                                                                                         | Count        | P_Value        | Benjamini        |
|--------------|------------|------------|-----------|------------------------------------------------------------|------------------------------------------------------------------------------------------------------------------------------------------------------------------|--------------|----------------|------------------|
| ILMN_1791702 | -0.2409067 | 0.10345653 | SMARCA2   | GOTERM_BP_FAT                                              | <a href="#">positive regulation of adaptive immune response based on somatic recombination of immune receptors built from immunoglobulin superfamily domains</a> | 4            | 2.80E-02       | 4.30E-01         |
| ILMN_2042595 | -0.5229749 | 0.10331385 | PCM1      | GOTERM_BP_FAT                                              | <a href="#">positive regulation of adaptive immune response</a>                                                                                                  | 4            | 3.00E-02       | 4.40E-01         |
| ILMN_1740430 | -0.310527  | 0.10329175 | SLC2A4RG  | GOTERM_BP_FAT                                              | <a href="#">regulation of adaptive immune response based on somatic recombination of immune receptors built from immunoglobulin superfamily domains</a>          | 5            | 3.30E-02       | 4.40E-01         |
| ILMN_1739428 | -1.0048952 | 0.10326946 | IFIT2     | GOTERM_BP_FAT                                              | <a href="#">regulation of adaptive immune response</a>                                                                                                           | 5            | 3.50E-02       | 4.40E-01         |
| ILMN_2408851 | -0.7082942 | 0.102796   | ARHGAP30  | <b>Annotation Cluster 42</b> <b>Enrichment Score: 1.5</b>  |                                                                                                                                                                  | <b>Count</b> | <b>P_Value</b> | <b>Benjamini</b> |
| ILMN_1677239 | -0.4022552 | 0.10207376 | CCDC14    | GOTERM_BP_FAT                                              | <a href="#">negative regulation of transcription, DNA-dependent</a>                                                                                              | 17           | 5.80E-03       | 2.10E-01         |
| ILMN_1670926 | -0.9411953 | 0.10141872 | CHST15    | GOTERM_BP_FAT                                              | <a href="#">negative regulation of transcription from RNA polymerase II promoter</a>                                                                             | 14           | 6.30E-03       | 2.20E-01         |
| ILMN_1652000 | -0.5560677 | 0.10119058 | FAM156B   | GOTERM_BP_FAT                                              | <a href="#">negative regulation of RNA metabolic process</a>                                                                                                     | 17           | 6.80E-03       | 2.30E-01         |
| ILMN_2230892 | -0.6070417 | 0.10088368 | IL10RB    | GOTERM_BP_FAT                                              | <a href="#">negative regulation of biosynthetic process</a>                                                                                                      | 23           | 8.50E-03       | 2.60E-01         |
| ILMN_2157951 | -0.4193257 | 0.10070315 | STX6      | GOTERM_BP_FAT                                              | <a href="#">negative regulation of cellular biosynthetic process</a>                                                                                             | 22           | 1.30E-02       | 3.30E-01         |
| ILMN_1691444 | -0.5584114 | 0.10005394 | UHRF2     | GOTERM_BP_FAT                                              | <a href="#">regulation of transcription from RNA polymerase II promoter</a>                                                                                      | 26           | 1.90E-02       | 3.90E-01         |
| ILMN_1697268 | -0.836865  | 0.09821321 | EMILIN2   | GOTERM_BP_FAT                                              | <a href="#">negative regulation of nitrogen compound metabolic process</a>                                                                                       | 20           | 2.20E-02       | 4.10E-01         |
| ILMN_1749915 | -0.5981271 | 0.09710187 | C1orf63   | GOTERM_BP_FAT                                              | <a href="#">negative regulation of transcription</a>                                                                                                             | 18           | 2.70E-02       | 4.20E-01         |
| ILMN_1703477 | -0.5192355 | 0.09669668 | ARHGEF2   | GOTERM_BP_FAT                                              | <a href="#">negative regulation of macromolecule biosynthetic process</a>                                                                                        | 20           | 3.50E-02       | 4.50E-01         |
| ILMN_2171289 | -1.8790541 | 0.09620509 | SAMSN1    | GOTERM_BP_FAT                                              | <a href="#">negative regulation of nucleobase, nucleoside, nucleotide and nucleic acid metabolic process</a>                                                     | 19           | 3.60E-02       | 4.40E-01         |
| ILMN_1684497 | -0.630926  | 0.09565401 | PYROXD2   | GOTERM_BP_FAT                                              | <a href="#">negative regulation of gene expression</a>                                                                                                           | 18           | 5.50E-02       | 5.50E-01         |
| ILMN_1734543 | -0.692723  | 0.09520887 | PTPRE     | GOTERM_BP_FAT                                              | <a href="#">negative regulation of macromolecule metabolic process</a>                                                                                           | 21           | 1.90E-01       | 8.20E-01         |
| ILMN_3307926 | -0.5134761 | 0.09490384 | ADRBK1    | GOTERM_BP_FAT                                              | <a href="#">regulation of transcription, DNA-dependent</a>                                                                                                       | 41           | 4.70E-01       | 9.70E-01         |
| ILMN_1709795 | -1.5240674 | 0.09409073 | RAC2      | GOTERM_BP_FAT                                              | <a href="#">regulation of RNA metabolic process</a>                                                                                                              | 41           | 5.30E-01       | 9.80E-01         |
| ILMN_1716264 | -1.9172883 | 0.09344087 | ANKRD1    | <b>Annotation Cluster 43</b> <b>Enrichment Score: 1.49</b> |                                                                                                                                                                  | <b>Count</b> | <b>P_Value</b> | <b>Benjamini</b> |
| ILMN_1898682 | -0.3377023 | 0.09318444 | PHIP      | INTERPRO                                                   | <a href="#">Interferon regulatory factor-3</a>                                                                                                                   | 3            | 7.90E-03       | 2.50E-01         |
| ILMN_2069128 | -0.5487559 | 0.09207791 | EPB41L2   | UP_SEQ_FEATURE                                             | <a href="#">DNA-binding region:Tryptophan pentad repeat</a>                                                                                                      | 3            | 1.30E-02       | 5.00E-01         |
| ILMN_1691539 | -0.5962633 | 0.0919627  | LAT       | INTERPRO                                                   | <a href="#">Interferon regulatory factor</a>                                                                                                                     | 3            | 1.30E-02       | 3.50E-01         |
| ILMN_2167805 | -0.7360011 | 0.09138069 | LUM       | INTERPRO                                                   | <a href="#">Interferon regulatory factor, conserved site</a>                                                                                                     | 3            | 1.30E-02       | 3.50E-01         |
| ILMN_3230435 | -0.5040896 | 0.09065887 | VOPP1     | SMART                                                      | <a href="#">IRF</a>                                                                                                                                              | 3            | 2.20E-02       | 3.80E-01         |
| ILMN_1893633 | -0.8568681 | 0.08968221 | LOC439949 | INTERPRO                                                   | <a href="#">SMAD domain-like</a>                                                                                                                                 | 3            | 3.50E-02       | 5.50E-01         |
| ILMN_1694840 | -0.8034787 | 0.0894372  | MATN2     | GOTERM_MF_FAT                                              | <a href="#">RNA polymerase II transcription factor activity</a>                                                                                                  | 8            | 2.90E-01       | 9.30E-01         |
| ILMN_1741942 | -0.398401  | 0.08924177 | STX16     | INTERPRO                                                   | <a href="#">Winged helix repressor DNA-binding</a>                                                                                                               | 6            | 3.20E-01       | 9.80E-01         |
| ILMN_1776157 | -0.7247066 | 0.08898276 | sept-04   | <b>Annotation Cluster 44</b> <b>Enrichment Score: 1.47</b> |                                                                                                                                                                  | <b>Count</b> | <b>P_Value</b> | <b>Benjamini</b> |
| ILMN_1666775 | -0.7897341 | 0.08870249 | CACNA1C   | GOTERM_BP_FAT                                              | <a href="#">actin cytoskeleton organization</a>                                                                                                                  | 11           | 2.90E-02       | 4.30E-01         |
| ILMN_1707695 | -2.0889034 | 0.08849268 | IFIT1     | GOTERM_BP_FAT                                              | <a href="#">cytoskeleton organization</a>                                                                                                                        | 17           | 3.30E-02       | 4.40E-01         |
| ILMN_1887174 | -0.5456803 | 0.08846726 | KIAA0146  | GOTERM_BP_FAT                                              | <a href="#">actin filament-based process</a>                                                                                                                     | 11           | 4.20E-02       | 4.70E-01         |
| ILMN_1742789 | -0.891553  | 0.0884307  | LPXN      | <b>Annotation Cluster 45</b> <b>Enrichment Score: 1.46</b> |                                                                                                                                                                  | <b>Count</b> | <b>P_Value</b> | <b>Benjamini</b> |
| ILMN_1767665 | -0.9345106 | 0.08790112 | GPX8      | GOTERM_BP_FAT                                              | <a href="#">regulation of cell activation</a>                                                                                                                    | 11           | 5.60E-03       | 2.10E-01         |
| ILMN_2082273 | -0.4205569 | 0.08783904 | RG55      | GOTERM_BP_FAT                                              | <a href="#">regulation of lymphocyte activation</a>                                                                                                              | 10           | 5.60E-03       | 2.10E-01         |
| ILMN_1799487 | -0.5319377 | 0.08777045 | N4BP2L1   | GOTERM_BP_FAT                                              | <a href="#">negative regulation of immune system process</a>                                                                                                     | 7            | 1.00E-02       | 2.90E-01         |
| ILMN_2398159 | -0.8470689 | 0.0872646  | DKK3      | GOTERM_BP_FAT                                              | <a href="#">regulation of leukocyte activation</a>                                                                                                               | 10           | 1.20E-02       | 3.10E-01         |
| ILMN_2098947 | -0.4422655 | 0.08719556 | AKO95700  | GOTERM_BP_FAT                                              | <a href="#">negative regulation of lymphocyte activation</a>                                                                                                     | 4            | 1.20E-01       | 7.10E-01         |
| ILMN_1794782 | -0.7457796 | 0.0850738  | ABCG1     | GOTERM_BP_FAT                                              | <a href="#">negative regulation of leukocyte activation</a>                                                                                                      | 4            | 1.30E-01       | 7.40E-01         |
| ILMN_1745607 | -0.7011312 | 0.08489525 | A2M       | GOTERM_BP_FAT                                              | <a href="#">negative regulation of cell activation</a>                                                                                                           | 4            | 1.50E-01       | 7.70E-01         |
| ILMN_1666785 | -0.3553518 | 0.08374754 | SYNE1     | GOTERM_BP_FAT                                              | <a href="#">negative regulation of T cell activation</a>                                                                                                         | 3            | 2.40E-01       | 8.70E-01         |
| ILMN_2148459 | -0.6083047 | 0.08253118 | B2M       | <b>Annotation Cluster 46</b> <b>Enrichment Score: 1.43</b> |                                                                                                                                                                  | <b>Count</b> | <b>P_Value</b> | <b>Benjamini</b> |
| ILMN_1791912 | -0.6120568 | 0.08252943 | SIDT2     | INTERPRO                                                   | <a href="#">Tumour necrosis factor-like</a>                                                                                                                      | 6            | 2.00E-03       | 1.00E-01         |
| ILMN_2086470 | -0.5840968 | 0.08087385 | PDGFRA    | INTERPRO                                                   | <a href="#">Tumor Necrosis Factor</a>                                                                                                                            | 3            | 4.50E-02       | 5.80E-01         |
| ILMN_1678841 | -0.740746  | 0.08058992 | UBD       | SMART                                                      | <a href="#">TNF</a>                                                                                                                                              | 3            | 7.10E-02       | 6.30E-01         |
| ILMN_2057981 | -0.6686943 | 0.07909441 | FAM164A   | GOTERM_MF_FAT                                              | <a href="#">tumor necrosis factor receptor binding</a>                                                                                                           | 3            | 7.70E-02       | 6.30E-01         |
| ILMN_1898518 | -0.7783019 | 0.07836554 | GFRA1     | GOTERM_MF_FAT                                              | <a href="#">tumor necrosis factor receptor superfamily binding</a>                                                                                               | 3            | 1.50E-01       | 7.80E-01         |
| ILMN_1911042 | -0.320335  | 0.07807413 | PIP4K2A   | <b>Annotation Cluster 47</b> <b>Enrichment Score: 1.42</b> |                                                                                                                                                                  | <b>Count</b> | <b>P_Value</b> | <b>Benjamini</b> |
| ILMN_1806752 | -0.5997548 | 0.07768083 | PLEKHH2   | GOTERM_BP_FAT                                              | <a href="#">response to nutrient</a>                                                                                                                             | 9            | 1.30E-02       | 3.20E-01         |
| ILMN_1795181 | -1.0102658 | 0.07754815 | DDX60     | GOTERM_BP_FAT                                              | <a href="#">response to vitamin A</a>                                                                                                                            | 5            | 1.40E-02       | 3.30E-01         |
| ILMN_1757552 | -0.418643  | 0.0775457  | PTRF      | GOTERM_BP_FAT                                              | <a href="#">response to extracellular stimulus</a>                                                                                                               | 11           | 2.50E-02       | 4.20E-01         |
| ILMN_1687501 | -1.0911491 | 0.07745464 | MOXD1     | GOTERM_BP_FAT                                              | <a href="#">response to vitamin</a>                                                                                                                              | 5            | 5.80E-02       | 5.50E-01         |
| ILMN_1706643 | -0.6055509 | 0.07680008 | COL6A3    | GOTERM_BP_FAT                                              | <a href="#">response to nutrient levels</a>                                                                                                                      | 9            | 7.10E-02       | 6.00E-01         |
| ILMN_1665909 | -0.297439  | 0.07678253 | LASP1     | GOTERM_BP_FAT                                              | <a href="#">response to retinoic acid</a>                                                                                                                        | 3            | 1.60E-01       | 8.00E-01         |

|              |            |            |             |
|--------------|------------|------------|-------------|
| ILMN_1703487 | -0.4389223 | 0.07673918 | LMO4        |
| ILMN_1799672 | -0.4509294 | 0.07661649 | CROCC       |
| ILMN_1731086 | -0.4449785 | 0.07578874 | ISL2        |
| ILMN_3241046 | -1.3381329 | 0.07547525 | MYBL1       |
| ILMN_1713449 | -0.8047564 | 0.07521348 | TBX3        |
| ILMN_2323944 | -0.4712394 | 0.07488582 | FAM110A     |
| ILMN_1657683 | -0.5632711 | 0.07470582 | C1orf198    |
| ILMN_1732799 | -0.6397462 | 0.07385269 | CD34        |
| ILMN_1651826 | -0.8626967 | 0.07272068 | BASP1       |
| ILMN_3245066 | -0.3758309 | 0.07259768 | DENND4B     |
| ILMN_1742618 | -3.0690904 | 0.071611   | XAF1        |
| ILMN_1715392 | -0.4913739 | 0.06900385 | PRPF3       |
| ILMN_1673933 | -0.4612814 | 0.06829594 | NPIP        |
| ILMN_1794470 | -0.4384409 | 0.06795633 | ANKFY1      |
| ILMN_1678842 | -0.9679654 | 0.06760374 | THBS2       |
| ILMN_1652512 | -0.5816504 | 0.06735905 | C2CD2       |
| ILMN_2122103 | -0.4310925 | 0.06677511 | ETS1        |
| ILMN_1663195 | -0.5292518 | 0.06537721 | MCM7        |
| ILMN_2407389 | -0.6593715 | 0.06515683 | GPNMB       |
| ILMN_2224143 | -0.3779939 | 0.06345493 | MCM3        |
| ILMN_1808634 | -0.3223416 | 0.06081992 | DRAM2       |
| ILMN_1829768 | -1.0059533 | 0.05623433 | BC047110    |
| ILMN_1693538 | -0.3450073 | 0.0555692  | STK36       |
| ILMN_1764709 | -0.5225451 | 0.05520299 | MAFB        |
| ILMN_1778691 | -0.5633244 | 0.05478557 | TIA1        |
| ILMN_1731224 | -1.1919034 | 0.05411996 | PARP9       |
| ILMN_3244110 | -0.426818  | 0.05406091 | FAM156B     |
| ILMN_1678961 | -0.4991477 | 0.05171973 | FRMD4A      |
| ILMN_1864685 | -0.7294178 | 0.04989669 | BC062365    |
| ILMN_1708006 | -0.8261792 | 0.0494976  | MICA        |
| ILMN_3207230 | -0.5748084 | 0.04940914 | LOC283588   |
| ILMN_2104356 | -1.2947727 | 0.04938726 | COL1A2      |
| ILMN_2131523 | -0.8579557 | 0.04890701 | SACS        |
| ILMN_1677038 | -1.0649506 | 0.04827893 | C7orf58     |
| ILMN_1660844 | -0.5447026 | 0.04755662 | INTS4       |
| ILMN_2277334 | -0.5340706 | 0.04749291 | KCNK2       |
| ILMN_3236156 | -0.3006278 | 0.04617408 | OSTC        |
| ILMN_1774077 | -0.7700593 | 0.0439755  | GBP2        |
| ILMN_1658926 | -0.5617282 | 0.04273477 | NOTCH3      |
| ILMN_1750075 | -0.4129226 | 0.04257144 | DMTF1       |
| ILMN_1651346 | -0.824809  | 0.04253814 | TICAM2      |
| ILMN_1668526 | -1.3196023 | 0.04111992 | GVIN1       |
| ILMN_1701308 | -1.2155994 | 0.03902149 | COL1A1      |
| ILMN_1773059 | -0.6809862 | 0.03829685 | GPR124      |
| ILMN_1662773 | -0.4721382 | 0.03742247 | SNURF-SNRPN |
| ILMN_2396991 | -1.237827  | 0.03555138 | HCST        |
| ILMN_1809094 | -0.8183383 | 0.03473254 | AX747733    |
| ILMN_2131177 | -0.6153819 | 0.03458107 | GUCY1A3     |
| ILMN_1782412 | -1.0307853 | 0.03383414 | IRX2        |
| ILMN_2223941 | -0.5435536 | 0.03249535 | FBLN5       |
| ILMN_1666594 | -1.4824603 | 0.03224498 | IRF8        |
| ILMN_2129234 | -0.3020076 | 0.03192231 | TMEM47      |
| ILMN_1760062 | -2.460666  | 0.03003611 | IFI44       |
| ILMN_3300358 | -0.7018808 | 0.02966945 | ZNF84       |
| ILMN_1721704 | -0.3054528 | 0.02947792 | FNTA        |
| ILMN_2383693 | -0.404843  | 0.02874064 | UPF2        |
| ILMN_2233366 | -0.453265  | 0.0280124  | ASAP1       |

**Annotation Cluster 48 Enrichment Score: 1.42**

|                 |                                             |
|-----------------|---------------------------------------------|
| INTERPRO        | <a href="#">Tumour necrosis factor-like</a> |
| SP_PIR_KEYWORDS | <a href="#">collagen</a>                    |
| UP_SEQ_FEATURE  | domain:C1q                                  |
| INTERPRO        | <a href="#">Complement C1q protein</a>      |
| UP_SEQ_FEATURE  | domain:Collagen-like                        |
| SMART           | <a href="#">C1Q</a>                         |

**Annotation Cluster 49 Enrichment Score: 1.41**

|               |                                                              |
|---------------|--------------------------------------------------------------|
| GOTERM_BP_FAT | <a href="#">regulation of T cell activation</a>              |
| GOTERM_BP_FAT | <a href="#">regulation of cell activation</a>                |
| GOTERM_BP_FAT | <a href="#">regulation of lymphocyte activation</a>          |
| GOTERM_BP_FAT | <a href="#">regulation of leukocyte activation</a>           |
| GOTERM_BP_FAT | <a href="#">regulation of T cell proliferation</a>           |
| GOTERM_BP_FAT | <a href="#">regulation of lymphocyte proliferation</a>       |
| GOTERM_BP_FAT | <a href="#">regulation of leukocyte proliferation</a>        |
| GOTERM_BP_FAT | <a href="#">regulation of mononuclear cell proliferation</a> |

**Annotation Cluster 50 Enrichment Score: 1.39**

|               |                                                                      |
|---------------|----------------------------------------------------------------------|
| GOTERM_BP_FAT | <a href="#">positive regulation of defense response</a>              |
| GOTERM_BP_FAT | <a href="#">regulation of inflammatory response</a>                  |
| GOTERM_BP_FAT | <a href="#">positive regulation of inflammatory response</a>         |
| GOTERM_BP_FAT | <a href="#">positive regulation of response to external stimulus</a> |
| GOTERM_BP_FAT | <a href="#">regulation of response to external stimulus</a>          |
| GOTERM_BP_FAT | <a href="#">regulation of acute inflammatory response</a>            |

**Annotation Cluster 51 Enrichment Score: 1.39**

|                 |                                                        |
|-----------------|--------------------------------------------------------|
| UP_SEQ_FEATURE  | propeptide:Removed in mature form                      |
| UP_SEQ_FEATURE  | lipid moiety-binding region:GPI-anchor amidated serine |
| SP_PIR_KEYWORDS | <a href="#">gpi-anchor</a>                             |
| GOTERM_CC_FAT   | <a href="#">anchored to membrane</a>                   |
| SP_PIR_KEYWORDS | <a href="#">phosphatidylinositol linkage</a>           |

**Annotation Cluster 52 Enrichment Score: 1.32**

|                 |                                       |
|-----------------|---------------------------------------|
| GOTERM_BP_FAT   | <a href="#">apoptosis</a>             |
| GOTERM_BP_FAT   | <a href="#">cell death</a>            |
| GOTERM_BP_FAT   | <a href="#">programmed cell death</a> |
| GOTERM_BP_FAT   | <a href="#">death</a>                 |
| SP_PIR_KEYWORDS | <a href="#">Apoptosis</a>             |

**Annotation Cluster 53 Enrichment Score: 1.29**

|                 |                                   |
|-----------------|-----------------------------------|
| SP_PIR_KEYWORDS | <a href="#">GTPase activation</a> |
| UP_SEQ_FEATURE  | domain:Rho-GAP                    |
| INTERPRO        | <a href="#">RhoGAP</a>            |
| SMART           | <a href="#">RhoGAP</a>            |

**Annotation Cluster 54 Enrichment Score: 1.26**

|               |                                                           |
|---------------|-----------------------------------------------------------|
| GOTERM_BP_FAT | <a href="#">regulation of immune effector process</a>     |
| GOTERM_BP_FAT | <a href="#">regulation of defense response to virus</a>   |
| GOTERM_BP_FAT | <a href="#">regulation of response to biotic stimulus</a> |
| GOTERM_BP_FAT | <a href="#">regulation of multi-organism process</a>      |

**Annotation Cluster 55 Enrichment Score: 1.26**

|                 |                                                 |
|-----------------|-------------------------------------------------|
| UP_SEQ_FEATURE  | domain:EGF-like 9                               |
| UP_SEQ_FEATURE  | domain:EGF-like 8                               |
| UP_SEQ_FEATURE  | domain:EGF-like 7                               |
| UP_SEQ_FEATURE  | domain:EGF-like 3                               |
| INTERPRO        | <a href="#">EGF-like region, conserved site</a> |
| SP_PIR_KEYWORDS | <a href="#">egf-like domain</a>                 |
| INTERPRO        | <a href="#">EGF-like, type 3</a>                |
| INTERPRO        | <a href="#">EGF</a>                             |
| INTERPRO        | <a href="#">EGF-like calcium-binding</a>        |
| UP_SEQ_FEATURE  | domain:EGF-like 5                               |
| UP_SEQ_FEATURE  | domain:EGF-like 6; calcium-binding              |

| Count | P_Value  | Benjamini |
|-------|----------|-----------|
| 6     | 2.00E-03 | 1.00E-01  |
| 8     | 2.90E-03 | 3.10E-02  |
| 3     | 1.30E-01 | 9.70E-01  |
| 3     | 1.30E-01 | 8.50E-01  |
| 3     | 1.60E-01 | 9.80E-01  |
| 3     | 2.00E-01 | 8.30E-01  |
| 9     | 4.40E-03 | 1.90E-01  |
| 11    | 5.60E-03 | 2.10E-01  |
| 10    | 5.60E-03 | 2.10E-01  |
| 10    | 1.20E-02 | 3.10E-01  |
| 4     | 1.60E-01 | 7.80E-01  |
| 4     | 2.80E-01 | 9.00E-01  |
| 4     | 2.80E-01 | 9.10E-01  |
| 4     | 2.80E-01 | 9.10E-01  |
| 6     | 2.30E-02 | 4.10E-01  |
| 6     | 2.60E-02 | 4.30E-01  |
| 4     | 2.80E-02 | 4.30E-01  |
| 5     | 5.30E-02 | 5.30E-01  |
| 8     | 6.30E-02 | 5.70E-01  |
| 3     | 7.80E-02 | 6.20E-01  |
| 11    | 1.70E-02 | 5.40E-01  |
| 5     | 2.30E-02 | 5.90E-01  |
| 7     | 4.00E-02 | 2.30E-01  |
| 10    | 5.60E-02 | 5.60E-01  |
| 3     | 1.30E-01 | 4.90E-01  |
| 22    | 2.60E-02 | 4.30E-01  |
| 25    | 2.90E-02 | 4.30E-01  |
| 22    | 3.00E-02 | 4.40E-01  |
| 25    | 3.00E-02 | 4.40E-01  |
| 10    | 3.50E-01 | 7.70E-01  |
| 8     | 4.00E-02 | 2.40E-01  |
| 5     | 4.10E-02 | 7.80E-01  |
| 5     | 4.50E-02 | 5.80E-01  |
| 5     | 9.70E-02 | 6.70E-01  |
| 8     | 7.00E-03 | 2.30E-01  |
| 3     | 6.50E-02 | 5.70E-01  |
| 3     | 1.30E-01 | 7.40E-01  |
| 3     | 1.50E-01 | 7.70E-01  |
| 5     | 1.00E-03 | 1.10E-01  |
| 4     | 1.30E-02 | 4.90E-01  |
| 4     | 1.60E-02 | 5.40E-01  |
| 6     | 1.70E-02 | 5.50E-01  |
| 12    | 3.50E-02 | 5.70E-01  |
| 10    | 4.10E-02 | 2.40E-01  |
| 9     | 4.20E-02 | 5.90E-01  |
| 7     | 4.30E-02 | 5.90E-01  |
| 6     | 4.40E-02 | 5.90E-01  |
| 4     | 4.80E-02 | 8.20E-01  |
| 3     | 8.80E-02 | 9.50E-01  |



|              |            |            |          |
|--------------|------------|------------|----------|
| ILMN_1666208 | -0.7825285 | 0.02779676 | MIS18BP1 |
| ILMN_2328094 | -0.7981768 | 0.02583879 | DACT1    |
| ILMN_1792506 | -0.616087  | 0.02408154 | PLA1A    |
| ILMN_1790136 | -0.4774218 | 0.02381867 | C20orf20 |
| ILMN_2402172 | -0.7193549 | 0.02330241 | sept-04  |
| ILMN_1807042 | -0.8996551 | 0.02306721 | MARCKS   |
| ILMN_1812473 | -0.5861107 | 0.02185519 | MLLT3    |
| ILMN_1717934 | -0.7884955 | 0.02136703 | SYT11    |
| ILMN_1767448 | -0.5449091 | 0.01176193 | LHFP     |
| ILMN_1701441 | -0.8963832 | 0.01134446 | LPAR1    |
| ILMN_1755727 | -0.4310157 | 0.01116782 | KDM5B    |
| ILMN_1836958 | -0.7591832 | 0.01066616 | BM703456 |
| ILMN_2395373 | -0.711017  | 0.00998119 | GABBR1   |
| ILMN_1678143 | -0.7815368 | 0.00972039 | ARHGDI1  |
| ILMN_1789007 | -1.7765667 | 0.0091216  | APOC1    |
| ILMN_1778238 | -0.4870963 | 0.00862525 | UTP6     |
| ILMN_1742230 | -0.6534504 | 0.0061385  | BAZ1A    |
| ILMN_3231881 | -0.358492  | 0.0047442  | PTMA     |
| ILMN_1711894 | -1.7565196 | 0.00328988 | MYB      |
| ILMN_1691731 | -1.3722534 | -0.04E-04  | PARP14   |
| ILMN_1753101 | -1.2060335 | -0.0021272 | VTCN1    |
| ILMN_2344650 | -0.5655251 | -0.003253  | N4BP2L1  |
| ILMN_1714809 | -0.4781135 | -0.0040298 | RPIA     |
| ILMN_3220952 | -0.9335808 | -0.0156769 | ANKRD36  |
| ILMN_2325028 | -0.8411629 | -0.0159033 | ODF2L    |
| ILMN_1700448 | -0.9654986 | -0.0248813 | SIM2     |
| ILMN_1830984 | -0.8059158 | -0.0326325 | BF509118 |
| ILMN_1736670 | -0.9749128 | -0.0442319 | PPP1R3C  |
| ILMN_2088437 | -1.4015719 | -0.0448213 | CX3CR1   |
| ILMN_1710937 | -1.2329658 | -0.0533357 | IFI16    |
| ILMN_1706502 | -0.7579128 | -0.0572491 | EIF2AK2  |
| ILMN_2351466 | -2.0834424 | -0.0743181 | NTM      |
| ILMN_1663866 | -1.4258738 | -0.081615  | TGFB1    |
| ILMN_1723912 | -3.1892138 | -0.1006719 | IFI44L   |
| ILMN_1835092 | -2.9079618 | -0.1650913 | IFI44L   |

|                              |                               |                                                                            |
|------------------------------|-------------------------------|----------------------------------------------------------------------------|
|                              | UP_SEQ_FEATURE                | domain:EGF-like 1                                                          |
|                              | UP_SEQ_FEATURE                | domain:EGF-like 2                                                          |
|                              | SMART                         | <a href="#">EGF_CA</a>                                                     |
|                              | UP_SEQ_FEATURE                | domain:EGF-like 4                                                          |
|                              | INTERPRO                      | <a href="#">EGF-like</a>                                                   |
|                              | INTERPRO                      | <a href="#">EGF-like calcium-binding conserved site</a>                    |
|                              | INTERPRO                      | <a href="#">EGF-type aspartate/asparagine hydroxylation conserved site</a> |
|                              | INTERPRO                      | <a href="#">EGF calcium-binding</a>                                        |
|                              | UP_SEQ_FEATURE                | domain:EGF-like 6                                                          |
|                              | SMART                         | <a href="#">EGF</a>                                                        |
| <b>Annotation Cluster 56</b> | <b>Enrichment Score: 1.26</b> |                                                                            |
|                              | BIOCARTA                      | <a href="#">Neutrophil and Its Surface Molecules</a>                       |
|                              | BIOCARTA                      | <a href="#">Adhesion Molecules on Lymphocyte</a>                           |
|                              | BIOCARTA                      | <a href="#">Monocyte and its Surface Molecules</a>                         |
| <b>Annotation Cluster 57</b> | <b>Enrichment Score: 1.22</b> |                                                                            |
|                              | GOTERM_CC_FAT                 | <a href="#">endosome membrane</a>                                          |
|                              | GOTERM_CC_FAT                 | <a href="#">endosomal part</a>                                             |
|                              | GOTERM_CC_FAT                 | <a href="#">endosome</a>                                                   |
| <b>Annotation Cluster 58</b> | <b>Enrichment Score: 1.21</b> |                                                                            |
|                              | GOTERM_BP_FAT                 | <a href="#">positive regulation of protein amino acid phosphorylation</a>  |
|                              | GOTERM_BP_FAT                 | <a href="#">positive regulation of phosphorylation</a>                     |
|                              | GOTERM_BP_FAT                 | <a href="#">positive regulation of phosphate metabolic process</a>         |
|                              | GOTERM_BP_FAT                 | <a href="#">positive regulation of phosphorus metabolic process</a>        |
|                              | GOTERM_BP_FAT                 | <a href="#">positive regulation of cellular protein metabolic process</a>  |
|                              | GOTERM_BP_FAT                 | <a href="#">positive regulation of protein metabolic process</a>           |
|                              | GOTERM_BP_FAT                 | <a href="#">positive regulation of protein modification process</a>        |
|                              | GOTERM_BP_FAT                 | <a href="#">regulation of peptidyl-tyrosine phosphorylation</a>            |
|                              | GOTERM_BP_FAT                 | <a href="#">positive regulation of peptidyl-tyrosine phosphorylation</a>   |
|                              | GOTERM_BP_FAT                 | <a href="#">regulation of protein amino acid phosphorylation</a>           |
|                              | GOTERM_BP_FAT                 | <a href="#">regulation of phosphorus metabolic process</a>                 |
|                              | GOTERM_BP_FAT                 | <a href="#">regulation of phosphate metabolic process</a>                  |
|                              | GOTERM_BP_FAT                 | <a href="#">regulation of phosphorylation</a>                              |
|                              | GOTERM_BP_FAT                 | <a href="#">regulation of protein modification process</a>                 |
|                              | GOTERM_BP_FAT                 | <a href="#">regulation of cellular protein metabolic process</a>           |
| <b>Annotation Cluster 59</b> | <b>Enrichment Score: 1.2</b>  |                                                                            |
|                              | KEGG_PATHWAY                  | <a href="#">Fc epsilon RI signaling pathway</a>                            |
|                              | KEGG_PATHWAY                  | <a href="#">B cell receptor signaling pathway</a>                          |
|                              | BIOCARTA                      | <a href="#">Fc Epsilon Receptor I Signaling in Mast Cells</a>              |
|                              | KEGG_PATHWAY                  | <a href="#">VEGF signaling pathway</a>                                     |
| <b>Annotation Cluster 60</b> | <b>Enrichment Score: 1.19</b> |                                                                            |
|                              | GOTERM_MF_FAT                 | <a href="#">phosphoinositide phospholipase C activity</a>                  |
|                              | GOTERM_MF_FAT                 | <a href="#">phospholipase C activity</a>                                   |
|                              | GOTERM_MF_FAT                 | <a href="#">lipase activity</a>                                            |
|                              | GOTERM_MF_FAT                 | <a href="#">peptide receptor activity</a>                                  |
|                              | GOTERM_MF_FAT                 | <a href="#">peptide receptor activity, G-protein coupled</a>               |
|                              | GOTERM_MF_FAT                 | <a href="#">phospholipase activity</a>                                     |
|                              | GOTERM_MF_FAT                 | <a href="#">phosphoric diester hydrolase activity</a>                      |
| <b>Annotation Cluster 61</b> | <b>Enrichment Score: 1.09</b> |                                                                            |
|                              | INTERPRO                      | <a href="#">FERM/acyl-CoA-binding protein, 3-helical bundle</a>            |
|                              | INTERPRO                      | <a href="#">FERM domain</a>                                                |
|                              | INTERPRO                      | <a href="#">FERM central domain</a>                                        |
|                              | UP_SEQ_FEATURE                | domain:FERM                                                                |
|                              | INTERPRO                      | <a href="#">Band 4.1 domain</a>                                            |
|                              | INTERPRO                      | <a href="#">FERM conserved site</a>                                        |
|                              | INTERPRO                      | <a href="#">Band 4.1 subgroup</a>                                          |
|                              | INTERPRO                      | <a href="#">FERM, N-terminal</a>                                           |
|                              | SMART                         | <a href="#">B41</a>                                                        |
| <b>Annotation Cluster 62</b> | <b>Enrichment Score: 1.08</b> |                                                                            |

|       |    |          |           |
|-------|----|----------|-----------|
| Count | 6  | 9.30E-02 | 9.50E-01  |
| Count | 5  | 1.00E-01 | 9.50E-01  |
| Count | 6  | 1.10E-01 | 6.80E-01  |
| Count | 4  | 1.10E-01 | 9.50E-01  |
| Count | 8  | 1.10E-01 | 8.20E-01  |
| Count | 5  | 1.30E-01 | 8.50E-01  |
| Count | 5  | 1.30E-01 | 8.50E-01  |
| Count | 4  | 1.80E-01 | 8.90E-01  |
| Count | 3  | 2.10E-01 | 9.90E-01  |
| Count | 8  | 2.70E-01 | 9.00E-01  |
| Count | 3  | 4.20E-02 | 8.40E-01  |
| Count | 3  | 5.30E-02 | 8.20E-01  |
| Count | 3  | 7.60E-02 | 8.70E-01  |
| Count | 5  | 3.70E-02 | 5.00E-01  |
| Count | 5  | 3.70E-02 | 5.00E-01  |
| Count | 11 | 1.60E-01 | 8.60E-01  |
| Count | 7  | 1.40E-02 | 3.30E-01  |
| Count | 7  | 2.10E-02 | 4.00E-01  |
| Count | 7  | 2.30E-02 | 4.20E-01  |
| Count | 7  | 2.30E-02 | 4.20E-01  |
| Count | 11 | 3.40E-02 | 4.50E-01  |
| Count | 11 | 4.40E-02 | 4.80E-01  |
| Count | 9  | 5.60E-02 | 5.40E-01  |
| Count | 5  | 6.30E-02 | 5.70E-01  |
| Count | 4  | 8.50E-02 | 6.40E-01  |
| Count | 8  | 8.90E-02 | 6.50E-01  |
| Count | 16 | 1.20E-01 | 7.20E-01  |
| Count | 16 | 1.20E-01 | 7.20E-01  |
| Count | 15 | 1.50E-01 | 7.70E-01  |
| Count | 10 | 2.10E-01 | 8.40E-01  |
| Count | 14 | 2.60E-01 | 8.80E-01  |
| Count | 8  | 8.00E-03 | 5.10E-02  |
| Count | 7  | 2.30E-02 | 1.20E-01  |
| Count | 4  | 1.30E-01 | 8.60E-01  |
| Count | 3  | 6.60E-01 | 9.20E-01  |
| Count | 4  | 1.70E-02 | 4.50E-01  |
| Count | 4  | 3.00E-02 | 4.60E-01  |
| Count | 6  | 6.90E-02 | 6.10E-01  |
| Count | 6  | 1.10E-01 | 7.00E-01  |
| Count | 6  | 1.10E-01 | 7.00E-01  |
| Count | 5  | 1.10E-01 | 7.00E-01  |
| Count | 5  | 1.10E-01 | 7.10E-01  |
| Count | 4  | 5.50E-02 | 6.30E-01  |
| Count | 4  | 6.80E-02 | 6.90E-01  |
| Count | 4  | 6.80E-02 | 6.90E-01  |
| Count | 4  | 7.10E-02 | 9.10E-01  |
| Count | 4  | 7.90E-02 | 7.10E-01  |
| Count | 4  | 7.90E-02 | 7.10E-01  |
| Count | 3  | 8.90E-02 | 7.50E-01  |
| Count | 3  | 1.20E-01 | 8.40E-01  |
| Count | 4  | 1.40E-01 | 7.30E-01  |
| Count |    | P_Value  | Benjamini |

|                              |                               |                                                                                                              |              |    |                |                  |
|------------------------------|-------------------------------|--------------------------------------------------------------------------------------------------------------|--------------|----|----------------|------------------|
|                              | GOTERM_BP_FAT                 | <a href="#">positive regulation of cell motion</a>                                                           |              | 7  | 2.10E-02       | 4.10E-01         |
|                              | GOTERM_BP_FAT                 | <a href="#">regulation of cell motion</a>                                                                    |              | 10 | 2.80E-02       | 4.30E-01         |
|                              | INTERPRO                      | <a href="#">Small chemokine, C-X-C, conserved site</a>                                                       |              | 3  | 4.50E-02       | 5.80E-01         |
|                              | GOTERM_BP_FAT                 | <a href="#">positive regulation of cell migration</a>                                                        |              | 5  | 1.30E-01       | 7.40E-01         |
|                              | GOTERM_BP_FAT                 | <a href="#">positive regulation of locomotion</a>                                                            |              | 5  | 1.70E-01       | 8.10E-01         |
|                              | GOTERM_BP_FAT                 | <a href="#">regulation of cell migration</a>                                                                 |              | 7  | 1.70E-01       | 8.10E-01         |
|                              | GOTERM_BP_FAT                 | <a href="#">regulation of locomotion</a>                                                                     |              | 7  | 2.50E-01       | 8.80E-01         |
| <b>Annotation Cluster 63</b> | <b>Enrichment Score: 1.06</b> |                                                                                                              | <b>Count</b> |    | <b>P_Value</b> | <b>Benjamini</b> |
|                              | GOTERM_BP_FAT                 | <a href="#">myeloid cell differentiation</a>                                                                 |              | 8  | 4.50E-03       | 1.80E-01         |
|                              | GOTERM_BP_FAT                 | <a href="#">homeostasis of number of cells</a>                                                               |              | 5  | 1.80E-01       | 8.10E-01         |
|                              | GOTERM_BP_FAT                 | <a href="#">erythrocyte differentiation</a>                                                                  |              | 3  | 2.50E-01       | 8.80E-01         |
|                              | GOTERM_BP_FAT                 | <a href="#">erythrocyte homeostasis</a>                                                                      |              | 3  | 3.00E-01       | 9.10E-01         |
| <b>Annotation Cluster 64</b> | <b>Enrichment Score: 1.02</b> |                                                                                                              | <b>Count</b> |    | <b>P_Value</b> | <b>Benjamini</b> |
|                              | UP_SEQ_FEATURE                | repeat:IV                                                                                                    |              | 3  | 9.50E-02       | 9.50E-01         |
|                              | UP_SEQ_FEATURE                | repeat:II                                                                                                    |              | 3  | 9.50E-02       | 9.50E-01         |
|                              | UP_SEQ_FEATURE                | repeat:III                                                                                                   |              | 3  | 9.50E-02       | 9.50E-01         |
|                              | UP_SEQ_FEATURE                | repeat:I                                                                                                     |              | 3  | 9.50E-02       | 9.50E-01         |
| <b>Annotation Cluster 65</b> | <b>Enrichment Score: 1.02</b> |                                                                                                              | <b>Count</b> |    | <b>P_Value</b> | <b>Benjamini</b> |
|                              | GOTERM_BP_FAT                 | <a href="#">regulation of transcription from RNA polymerase II promoter</a>                                  |              | 26 | 1.90E-02       | 3.90E-01         |
|                              | GOTERM_BP_FAT                 | <a href="#">positive regulation of macromolecule metabolic process</a>                                       |              | 29 | 2.50E-02       | 4.20E-01         |
|                              | GOTERM_BP_FAT                 | <a href="#">positive regulation of biosynthetic process</a>                                                  |              | 24 | 3.50E-02       | 4.40E-01         |
|                              | GOTERM_BP_FAT                 | <a href="#">positive regulation of specific transcription from RNA polymerase II promoter</a>                |              | 5  | 3.70E-02       | 4.50E-01         |
|                              | GOTERM_BP_FAT                 | <a href="#">positive regulation of gene-specific transcription</a>                                           |              | 6  | 4.30E-02       | 4.80E-01         |
|                              | GOTERM_BP_FAT                 | <a href="#">positive regulation of macromolecule biosynthetic process</a>                                    |              | 22 | 5.60E-02       | 5.40E-01         |
|                              | GOTERM_BP_FAT                 | <a href="#">regulation of specific transcription from RNA polymerase II promoter</a>                         |              | 6  | 5.70E-02       | 5.50E-01         |
|                              | GOTERM_BP_FAT                 | <a href="#">regulation of gene-specific transcription</a>                                                    |              | 7  | 7.70E-02       | 6.20E-01         |
|                              | GOTERM_BP_FAT                 | <a href="#">positive regulation of cellular biosynthetic process</a>                                         |              | 22 | 8.20E-02       | 6.30E-01         |
|                              | GOTERM_BP_FAT                 | <a href="#">positive regulation of gene expression</a>                                                       |              | 19 | 9.30E-02       | 6.60E-01         |
|                              | GOTERM_BP_FAT                 | <a href="#">positive regulation of nucleobase, nucleoside, nucleotide and nucleic acid metabolic process</a> |              | 19 | 1.50E-01       | 7.70E-01         |
|                              | GOTERM_BP_FAT                 | <a href="#">positive regulation of transcription, DNA-dependent</a>                                          |              | 15 | 1.70E-01       | 8.00E-01         |
|                              | GOTERM_BP_FAT                 | <a href="#">positive regulation of RNA metabolic process</a>                                                 |              | 15 | 1.80E-01       | 8.20E-01         |
|                              | GOTERM_BP_FAT                 | <a href="#">positive regulation of nitrogen compound metabolic process</a>                                   |              | 19 | 1.80E-01       | 8.20E-01         |
|                              | GOTERM_BP_FAT                 | <a href="#">positive regulation of transcription</a>                                                         |              | 17 | 1.90E-01       | 8.10E-01         |
|                              | GOTERM_BP_FAT                 | <a href="#">negative regulation of specific transcription from RNA polymerase II promoter</a>                |              | 3  | 2.30E-01       | 8.60E-01         |
|                              | GOTERM_BP_FAT                 | <a href="#">negative regulation of gene-specific transcription</a>                                           |              | 3  | 2.90E-01       | 9.10E-01         |
|                              | GOTERM_MF_FAT                 | <a href="#">transcription activator activity</a>                                                             |              | 12 | 2.90E-01       | 9.30E-01         |
|                              | GOTERM_BP_FAT                 | <a href="#">positive regulation of transcription from RNA polymerase II promoter</a>                         |              | 11 | 3.00E-01       | 9.20E-01         |
| <b>Annotation Cluster 66</b> | <b>Enrichment Score: 1.01</b> |                                                                                                              | <b>Count</b> |    | <b>P_Value</b> | <b>Benjamini</b> |
|                              | UP_SEQ_FEATURE                | domain:PARP catalytic                                                                                        |              | 3  | 4.40E-02       | 8.00E-01         |
|                              | INTERPRO                      | <a href="#">Poly(ADP-ribose) polymerase, catalytic region</a>                                                |              | 3  | 4.50E-02       | 5.80E-01         |
|                              | GOTERM_MF_FAT                 | <a href="#">transferase activity, transferring pentosyl groups</a>                                           |              | 4  | 8.00E-02       | 6.30E-01         |
|                              | GOTERM_MF_FAT                 | <a href="#">NAD+ ADP-ribosyltransferase activity</a>                                                         |              | 3  | 1.00E-01       | 7.00E-01         |
|                              | SP_PIR_KEYWORDS               | <a href="#">nad</a>                                                                                          |              | 5  | 5.20E-01       | 9.00E-01         |
| <b>Annotation Cluster 67</b> | <b>Enrichment Score: 1.01</b> |                                                                                                              | <b>Count</b> |    | <b>P_Value</b> | <b>Benjamini</b> |
|                              | GOTERM_MF_FAT                 | <a href="#">protein binding, bridging</a>                                                                    |              | 6  | 5.60E-02       | 5.50E-01         |
|                              | GOTERM_MF_FAT                 | <a href="#">SH3/SH2 adaptor activity</a>                                                                     |              | 4  | 9.20E-02       | 6.70E-01         |
|                              | GOTERM_MF_FAT                 | <a href="#">molecular adaptor activity</a>                                                                   |              | 4  | 1.80E-01       | 8.30E-01         |
