# Supplementary material for: Intrarenal activation of adaptive immune effectors is associated with tubular damage and impaired renal function in lupus nephritis
Source: PubMed Central journal article supplement (PMC6241616; doi:10.1136/annrheumdis-2018-213485), 2018-07-31
Supplement: annrheumdis-2018-213485supp003.pdf [file annrheumdis-2018-213485supp003.pdf]

**Supplementary Table 2 : Transcripts and pathways down-regulated in SLE compared to control renal biopsies**

Differences in (Log2-transformed, mean-centered) gene expression between lupus and control biopsies were analyzed using a moderated t test with Benjamini-Hochberg correction for multiple comparisons (*p* value threshold set to 0.05). Pathway analyses were performed using DAVID software. Enrichment scores are  $-\log_{10} p$  values, calculated by modified Fisher Exact test by comparing proportions of transcripts belonging to a given pathway in the tested gene list compared to the whole transcriptome.[14, 15]

**Transcripts**

| Identifier   | [Control] | [SLE]      | Gene Symbol |
|--------------|-----------|------------|-------------|
| ILMN_1751607 | 2.8195102 | 0.25910223 | FOSB        |
| ILMN_1682763 | 2.1716797 | -0.4070203 | ALB         |
| ILMN_1781285 | 1.7535293 | -0.0462692 | DUSP1       |
| ILMN_1723522 | 1.718832  | -0.2997489 | APOLD1      |
| ILMN_1765232 | 1.632873  | 0.14076953 | RNLS        |
| ILMN_1662880 | 1.6177534 | -0.1763568 | FIS         |
| ILMN_1813361 | 1.6158535 | 0.08449265 | ANGPTL7     |
| ILMN_2047618 | 1.6081884 | -0.0522185 | KCNE1       |
| ILMN_1711015 | 1.577714  | -0.2619377 | CRYAA       |
| ILMN_3241522 | 1.5764322 | 0.24194288 | ASS1        |
| ILMN_1655613 | 1.530049  | -0.5030355 | GSTA2       |
| ILMN_1881598 | 1.51809   | -0.475416  | AW451118    |
| ILMN_3247082 | 1.5137397 | -0.0834251 | FAM150B     |
| ILMN_2089752 | 1.5075352 | -0.1929424 | FAM150B     |
| ILMN_1696450 | 1.4678926 | 0.06374492 | KLK1        |
| ILMN_3275388 | 1.4390585 | 0.21589966 | ASS1        |
| ILMN_1782939 | 1.3710135 | -0.3634806 | ALB         |
| ILMN_2133205 | 1.3688912 | -0.1144226 | GPX2        |
| ILMN_1772894 | 1.3178729 | -0.2878681 | TMEM27      |
| ILMN_2339955 | 1.3147991 | 0.04464598 | NR4A2       |
| ILMN_1737096 | 1.3111312 | -0.2938448 | CLDN10      |
| ILMN_1705627 | 1.2944648 | -5.71E-04  | USP2        |
| ILMN_1739168 | 1.2869183 | -0.1076895 | OR2T10      |
| ILMN_2237474 | 1.2793396 | -0.1041819 | TBC1D8B     |
| ILMN_2188264 | 1.274447  | -0.1758597 | CYR61       |
| ILMN_1767113 | 1.260937  | -0.3245975 | AOX1        |
| ILMN_1810233 | 1.2288419 | -0.0995989 | UGT2B11     |
| ILMN_2304404 | 1.2267187 | -0.0876096 | PBLD        |
| ILMN_3235647 | 1.2152774 | 0.0331636  | SIK1        |
| ILMN_1714880 | 1.2068622 | -0.0267972 | LIMS3L      |
| ILMN_1718152 | 1.2048471 | 0.02960346 | DEPDC7      |
| ILMN_1781952 | 1.2007838 | -0.2865848 | MGST1       |
| ILMN_1811330 | 1.194678  | -0.115554  | FAM134B     |
| ILMN_3247998 | 1.1940734 | -0.0809081 | STAP1       |
| ILMN_1808114 | 1.182895  | -0.0124336 | LYVE1       |
| ILMN_2171396 | 1.1632164 | -0.1204032 | MT1H        |
| ILMN_2386973 | 1.1416459 | -0.2422134 | PKP2        |
| ILMN_3305273 | 1.1362882 | -0.3057672 | PSAT1       |
| ILMN_1769478 | 1.135193  | 0.02884816 | SPATA24     |
| ILMN_2269256 | 1.1302254 | -0.2344332 | DNAJC12     |
| ILMN_1680590 | 1.1216688 | -0.2095973 | LOC644662   |
| ILMN_1738268 | 1.1201845 | -0.2776719 | IP6K3       |
| ILMN_1687757 | 1.0949409 | -0.1497835 | AKR1C4      |
| ILMN_1740233 | 1.0700529 | -0.1506468 | UGT1A1      |
| ILMN_1668312 | 1.0680447 | -0.2967684 | SLC2A9      |
| ILMN_2189859 | 1.0647331 | -0.1103592 | TMEM192     |
| ILMN_1662049 | 1.0636001 | -0.150321  | AGPAT5      |
| ILMN_2312194 | 1.0485913 | -0.0375959 | CYB5A       |
| ILMN_1811820 | 1.0399048 | 0.00878903 | SRRM4       |

**Pathways**

| Annotation Cluster   | Enrichment Score                                                                                          | Database        | Pathway                                                              | Count    | P_Value  | Benjamini |
|----------------------|-----------------------------------------------------------------------------------------------------------|-----------------|----------------------------------------------------------------------|----------|----------|-----------|
| Annotation Cluster 1 | Enrichment Score: 7.43                                                                                    | SP_PIR_KEYWORDS | <a href="#">mitochondrion</a>                                        | 52       | 6.80E-20 | 2.30E-17  |
|                      |                                                                                                           | GOTERM_CC_FAT   | <a href="#">mitochondrion</a>                                        | 60       | 2.70E-19 | 7.50E-17  |
|                      |                                                                                                           | GOTERM_CC_FAT   | <a href="#">mitochondrial part</a>                                   | 42       | 7.40E-17 | 1.50E-14  |
|                      |                                                                                                           | GOTERM_CC_FAT   | <a href="#">mitochondrial envelope</a>                               | 34       | 3.00E-15 | 2.80E-13  |
|                      |                                                                                                           | GOTERM_CC_FAT   | <a href="#">mitochondrial inner membrane</a>                         | 28       | 8.40E-14 | 5.80E-12  |
|                      |                                                                                                           | GOTERM_CC_FAT   | <a href="#">mitochondrial membrane</a>                               | 31       | 1.50E-13 | 8.60E-12  |
|                      |                                                                                                           | UP_SEQ_FEATURE  | transit peptide:Mitochondrion                                        | 32       | 3.90E-13 | 2.80E-10  |
|                      |                                                                                                           | GOTERM_CC_FAT   | <a href="#">organelle inner membrane</a>                             | 28       | 4.80E-13 | 2.20E-11  |
|                      |                                                                                                           | SP_PIR_KEYWORDS | <a href="#">transit peptide</a>                                      | 32       | 5.50E-13 | 9.10E-11  |
|                      |                                                                                                           | GOTERM_CC_FAT   | <a href="#">organelle envelope</a>                                   | 37       | 1.60E-12 | 6.30E-11  |
|                      |                                                                                                           | GOTERM_CC_FAT   | <a href="#">envelope</a>                                             | 37       | 1.70E-12 | 6.00E-11  |
|                      |                                                                                                           | SP_PIR_KEYWORDS | <a href="#">mitochondrion inner membrane</a>                         | 21       | 2.20E-12 | 2.40E-10  |
|                      |                                                                                                           | GOTERM_BP_FAT   | <a href="#">generation of precursor metabolites and energy</a>       | 26       | 5.80E-12 | 8.30E-09  |
|                      |                                                                                                           | SP_PIR_KEYWORDS | <a href="#">electron transport</a>                                   | 13       | 1.20E-08 | 9.50E-07  |
|                      |                                                                                                           | GOTERM_BP_FAT   | <a href="#">electron transport chain</a>                             | 14       | 1.30E-08 | 6.10E-06  |
|                      |                                                                                                           | GOTERM_CC_FAT   | <a href="#">respiratory chain</a>                                    | 12       | 1.30E-08 | 4.10E-07  |
|                      |                                                                                                           | KEGG_PATHWAY    | <a href="#">Parkinson's disease</a>                                  | 15       | 8.30E-08 | 1.00E-05  |
|                      |                                                                                                           | GOTERM_CC_FAT   | <a href="#">organelle membrane</a>                                   | 41       | 8.50E-08 | 2.40E-06  |
|                      |                                                                                                           | KEGG_PATHWAY    | <a href="#">Oxidative phosphorylation</a>                            | 15       | 1.00E-07 | 6.40E-06  |
|                      |                                                                                                           | SP_PIR_KEYWORDS | <a href="#">respiratory chain</a>                                    | 10       | 5.00E-07 | 3.30E-05  |
|                      |                                                                                                           | GOTERM_CC_FAT   | <a href="#">mitochondrial membrane part</a>                          | 12       | 2.60E-06 | 6.60E-05  |
|                      |                                                                                                           | KEGG_PATHWAY    | <a href="#">Huntington's disease</a>                                 | 15       | 5.50E-06 | 2.30E-04  |
|                      |                                                                                                           | KEGG_PATHWAY    | <a href="#">Alzheimer's disease</a>                                  | 14       | 9.40E-06 | 2.90E-04  |
|                      |                                                                                                           | GOTERM_BP_FAT   | <a href="#">energy derivation by oxidation of organic compounds</a>  | 12       | 9.40E-06 | 3.40E-03  |
|                      |                                                                                                           | GOTERM_BP_FAT   | <a href="#">cellular respiration</a>                                 | 10       | 1.30E-05 | 3.80E-03  |
|                      |                                                                                                           | GOTERM_BP_FAT   | <a href="#">oxidative phosphorylation</a>                            | 10       | 1.40E-05 | 3.40E-03  |
|                      |                                                                                                           | GOTERM_BP_FAT   | <a href="#">mitochondrial electron transport, NADH to ubiquinone</a> | 7        | 3.30E-05 | 6.70E-03  |
|                      |                                                                                                           | GOTERM_CC_FAT   | <a href="#">mitochondrial respiratory chain complex I</a>            | 7        | 3.50E-05 | 8.00E-04  |
|                      |                                                                                                           | GOTERM_CC_FAT   | <a href="#">NADH dehydrogenase complex</a>                           | 7        | 3.50E-05 | 8.00E-04  |
|                      |                                                                                                           | GOTERM_CC_FAT   | <a href="#">respiratory chain complex I</a>                          | 7        | 3.50E-05 | 8.00E-04  |
|                      |                                                                                                           | GOTERM_CC_FAT   | <a href="#">mitochondrial respiratory chain</a>                      | 8        | 4.50E-05 | 9.60E-04  |
|                      |                                                                                                           | GOTERM_MF_FAT   | <a href="#">NADH dehydrogenase (quinone) activity</a>                | 7        | 4.80E-05 | 1.20E-02  |
|                      |                                                                                                           | GOTERM_MF_FAT   | <a href="#">NADH dehydrogenase activity</a>                          | 7        | 4.80E-05 | 1.20E-02  |
| GOTERM_MF_FAT        | <a href="#">NADH dehydrogenase (ubiquinone) activity</a>                                                  | 7               | 4.80E-05                                                             | 1.20E-02 |          |           |
| GOTERM_MF_FAT        | <a href="#">oxidoreductase activity, acting on NADH or NADPH, quinone or similar compound as acceptor</a> | 7               | 1.00E-04                                                             | 1.70E-02 |          |           |
| GOTERM_BP_FAT        | <a href="#">mitochondrial ATP synthesis coupled electron transport</a>                                    | 7               | 1.70E-04                                                             | 3.00E-02 |          |           |
| GOTERM_BP_FAT        | <a href="#">ATP synthesis coupled electron transport</a>                                                  | 7               | 1.70E-04                                                             | 3.00E-02 |          |           |
| GOTERM_MF_FAT        | <a href="#">oxidoreductase activity, acting on NADH or NADPH</a>                                          | 8               | 2.90E-04                                                             | 3.70E-02 |          |           |
| GOTERM_BP_FAT        | <a href="#">respiratory electron transport chain</a>                                                      | 7               | 3.60E-04                                                             | 3.90E-02 |          |           |
| SP_PIR_KEYWORDS      | <a href="#">ubiquinone</a>                                                                                | 5               | 7.00E-04                                                             | 2.30E-02 |          |           |
| GOTERM_BP_FAT        | <a href="#">phosphate metabolic process</a>                                                               | 22              | 5.20E-02                                                             | 7.60E-01 |          |           |
| GOTERM_BP_FAT        | <a href="#">phosphorus metabolic process</a>                                                              | 22              | 5.20E-02                                                             | 7.60E-01 |          |           |
| GOTERM_BP_FAT        | <a href="#">phosphorylation</a>                                                                           | 16              | 2.10E-01                                                             | 9.60E-01 |          |           |
| Annotation Cluster 2 | Enrichment Score: 6.54                                                                                    | GOTERM_BP_FAT   | <a href="#">oxidation reduction</a>                                  | 34       | 2.80E-10 | 2.00E-07  |
|                      |                                                                                                           | GOTERM_MF_FAT   | <a href="#">electron carrier activity</a>                            | 15       | 8.70E-06 | 4.40E-03  |
|                      |                                                                                                           | SP_PIR_KEYWORDS | <a href="#">oxidoreductase</a>                                       | 23       | 9.80E-06 | 4.60E-04  |
| Annotation Cluster 3 | Enrichment Score: 2.6                                                                                     | GOTERM_BP_FAT   | <a href="#">carboxylic acid transport</a>                            | 10       | 3.30E-04 | 4.70E-02  |



|              |            |            |              |                              |                                                                                                       |              |                |                  |
|--------------|------------|------------|--------------|------------------------------|-------------------------------------------------------------------------------------------------------|--------------|----------------|------------------|
| ILMN_2311020 | 0.7967522  | -0.231525  | DNAJC12      | GOTERM_MF_FAT                | <a href="#">glucuronosyltransferase activity</a>                                                      | 4            | 4.50E-03       | 2.50E-01         |
| ILMN_1760727 | 0.796078   | -0.1365215 | ANG          | KEGG_PATHWAY                 | <a href="#">Starch and sucrose metabolism</a>                                                         | 5            | 7.70E-03       | 1.10E-01         |
| ILMN_1672191 | 0.7951682  | -0.1318213 | ATP5F1       | KEGG_PATHWAY                 | <a href="#">Steroid hormone biosynthesis</a>                                                          | 5            | 1.10E-02       | 1.40E-01         |
| ILMN_1666280 | 0.793285   | -0.1056904 | COX11        | KEGG_PATHWAY                 | <a href="#">Porphyrin and chlorophyll metabolism</a>                                                  | 4            | 2.40E-02       | 2.20E-01         |
| ILMN_1778357 | 0.78927904 | -0.1400197 | DNMT3L       | KEGG_PATHWAY                 | <a href="#">Androgen and estrogen metabolism</a>                                                      | 4            | 3.20E-02       | 2.40E-01         |
| ILMN_2266334 | 0.7832703  | -0.1595441 | BCAP29       | KEGG_PATHWAY                 | <a href="#">Ascorbate and aldarate metabolism</a>                                                     | 3            | 4.00E-02       | 2.70E-01         |
| ILMN_1738491 | 0.7827796  | -0.1136861 | SNX30        | KEGG_PATHWAY                 | <a href="#">Drug metabolism</a>                                                                       | 3            | 1.90E-01       | 7.20E-01         |
| ILMN_1654385 | 0.78150266 | -0.1364169 | ASB13        | KEGG_PATHWAY                 | <a href="#">Retinol metabolism</a>                                                                    | 3            | 2.70E-01       | 8.20E-01         |
| ILMN_1756723 | 0.78099924 | -0.15574   | DPP7         | SP_PIR_KEYWORDS              | <a href="#">glycosyltransferase</a>                                                                   | 4            | 5.60E-01       | 9.90E-01         |
| ILMN_1729514 | 0.7792935  | -0.302168  | CMTM4        | <b>Annotation Cluster 11</b> | <b>Enrichment Score: 1.66</b>                                                                         | <b>Count</b> | <b>P_Value</b> | <b>Benjamini</b> |
| ILMN_1672443 | 0.77397776 | -0.0800685 | QDPR         | GOTERM_BP_FAT                | <a href="#">glucose transport</a>                                                                     | 4            | 8.80E-03       | 4.20E-01         |
| ILMN_2338038 | 0.7729864  | -0.4243262 | AK4          | GOTERM_BP_FAT                | <a href="#">hexose transport</a>                                                                      | 4            | 9.60E-03       | 4.30E-01         |
| ILMN_2231911 | 0.7704615  | 0.01107736 | AUH          | GOTERM_BP_FAT                | <a href="#">monosaccharide transport</a>                                                              | 4            | 1.10E-02       | 4.40E-01         |
| ILMN_1777521 | 0.7697696  | -0.0761192 | GLUD2        | SP_PIR_KEYWORDS              | <a href="#">sugar transport</a>                                                                       | 4            | 1.40E-02       | 3.00E-01         |
| ILMN_1665510 | 0.7655499  | -0.0504299 | ERRF1        | GOTERM_MF_FAT                | <a href="#">hexose transmembrane transporter activity</a>                                             | 3            | 3.10E-02       | 5.00E-01         |
| ILMN_1682935 | 0.7580247  | -0.0786566 | LYPLAL1      | GOTERM_MF_FAT                | <a href="#">monosaccharide transmembrane transporter activity</a>                                     | 3            | 3.40E-02       | 5.20E-01         |
| ILMN_1803073 | 0.7517055  | -0.1846666 | DNAJC12      | GOTERM_MF_FAT                | <a href="#">sugar transmembrane transporter activity</a>                                              | 3            | 6.10E-02       | 6.70E-01         |
| ILMN_1806754 | 0.74729544 | -0.0430816 | GLDC         | GOTERM_BP_FAT                | <a href="#">carbohydrate transport</a>                                                                | 4            | 6.10E-02       | 7.80E-01         |
| ILMN_1693210 | 0.7441589  | -0.0216614 | NSMCE2       | <b>Annotation Cluster 12</b> | <b>Enrichment Score: 1.64</b>                                                                         | <b>Count</b> | <b>P_Value</b> | <b>Benjamini</b> |
| ILMN_1781386 | 0.74344814 | -0.0522447 | WIPI1        | UP_SEQ_FEATURE               | nucleotide phosphate-binding region:NADP                                                              | 5            | 1.70E-02       | 7.90E-01         |
| ILMN_1762255 | 0.73785657 | -0.0403223 | GSTM1        | SP_PIR_KEYWORDS              | <a href="#">nadh</a>                                                                                  | 7            | 2.00E-02       | 3.40E-01         |
|              |            |            |              |                              | <a href="#">oxidoreductase activity, acting on the CH-CH group of donors, NAD or NADP as acceptor</a> | 3            | 3.40E-02       | 5.20E-01         |
| ILMN_1674049 | 0.73529196 | -0.27112   | TEAD1        | <b>Annotation Cluster 13</b> | <b>Enrichment Score: 1.59</b>                                                                         | <b>Count</b> | <b>P_Value</b> | <b>Benjamini</b> |
| ILMN_2274923 | 0.73353514 | -0.2149434 | MOCS2        | GOTERM_MF_FAT                | <a href="#">transferase activity, transferring alkyl or aryl (other than methyl) groups</a>           | 5            | 6.90E-03       | 2.50E-01         |
| ILMN_1753502 | 0.73177016 | -0.3400245 | IGSF11       | GOTERM_MF_FAT                | <a href="#">glutathione transferase activity</a>                                                      | 3            | 3.80E-02       | 5.40E-01         |
| ILMN_1713124 | 0.73093295 | -0.2341701 | AKR1C3       | KEGG_PATHWAY                 | <a href="#">Glutathione metabolism</a>                                                                | 4            | 6.80E-02       | 4.00E-01         |
| ILMN_1784661 | 0.7306732  | -0.099162  | TMEM2        | <b>Annotation Cluster 14</b> | <b>Enrichment Score: 1.5</b>                                                                          | <b>Count</b> | <b>P_Value</b> | <b>Benjamini</b> |
| ILMN_1692535 | 0.7300153  | -0.2228338 | DPP4         | GOTERM_MF_FAT                | <a href="#">amino acid binding</a>                                                                    | 5            | 1.40E-02       | 3.80E-01         |
| ILMN_2133038 | 0.7248892  | -0.1838501 | UGT3A1       | GOTERM_MF_FAT                | <a href="#">carboxylic acid binding</a>                                                               | 7            | 2.50E-02       | 4.50E-01         |
| ILMN_1685678 | 0.7192287  | -0.2980072 | EEF1B2       | GOTERM_MF_FAT                | <a href="#">amine binding</a>                                                                         | 5            | 9.10E-02       | 7.60E-01         |
| ILMN_2184556 | 0.71878004 | -0.4122432 | SLC4A4       | <b>Annotation Cluster 15</b> | <b>Enrichment Score: 1.48</b>                                                                         | <b>Count</b> | <b>P_Value</b> | <b>Benjamini</b> |
| ILMN_1704139 | 0.7152482  | -0.065184  | DHRX         | GOTERM_BP_FAT                | <a href="#">fatty acid metabolic process</a>                                                          | 8            | 2.80E-02       | 6.50E-01         |
| ILMN_1733956 | 0.7119044  | -0.0826878 | IAR5         | GOTERM_BP_FAT                | <a href="#">icosanoid metabolic process</a>                                                           | 4            | 3.20E-02       | 6.70E-01         |
| ILMN_1734897 | 0.71177924 | -0.3864933 | SLC4A4       | GOTERM_BP_FAT                | <a href="#">unsaturated fatty acid metabolic process</a>                                              | 4            | 3.90E-02       | 7.10E-01         |
| ILMN_2408572 | 0.7102041  | -0.0850099 | ANG          | <b>Annotation Cluster 16</b> | <b>Enrichment Score: 1.47</b>                                                                         | <b>Count</b> | <b>P_Value</b> | <b>Benjamini</b> |
| ILMN_1678678 | 0.7098415  | -0.0032822 | SLC37A4      | GOTERM_MF_FAT                | <a href="#">symporter activity</a>                                                                    | 8            | 5.40E-03       | 2.70E-01         |
| ILMN_1662331 | 0.70453346 | -0.0670416 | PDSS2        | GOTERM_MF_FAT                | <a href="#">solute:cation symporter activity</a>                                                      | 5            | 6.00E-02       | 6.80E-01         |
| ILMN_2098437 | 0.70245284 | -0.1573015 | ST13         | GOTERM_BP_FAT                | <a href="#">anion transport</a>                                                                       | 6            | 6.10E-02       | 7.80E-01         |
| ILMN_3248403 | 0.70005864 | -0.0514489 | SDHC         | SP_PIR_KEYWORDS              | <a href="#">Symport</a>                                                                               | 5            | 6.50E-02       | 5.50E-01         |
| ILMN_1750158 | 0.6932785  | -0.1909055 | ACOX1        | <b>Annotation Cluster 17</b> | <b>Enrichment Score: 1.43</b>                                                                         | <b>Count</b> | <b>P_Value</b> | <b>Benjamini</b> |
| ILMN_2367239 | 0.6911485  | -0.0624428 | RCAN1        | GOTERM_BP_FAT                | <a href="#">mitochondrion organization</a>                                                            | 8            | 4.40E-03       | 2.70E-01         |
| ILMN_1689869 | 0.68983126 | -0.1554704 | GPR89A       | GOTERM_BP_FAT                | <a href="#">NADH dehydrogenase complex assembly</a>                                                   | 3            | 9.10E-03       | 4.20E-01         |
| ILMN_1658917 | 0.6896757  | -0.249306  | SLC1A1       | GOTERM_BP_FAT                | <a href="#">mitochondrial respiratory chain complex I assembly</a>                                    | 3            | 9.10E-03       | 4.20E-01         |
| ILMN_1847793 | 0.6842585  | -0.0584133 | CA449405     | GOTERM_BP_FAT                | <a href="#">mitochondrial respiratory chain complex assembly</a>                                      | 3            | 1.30E-02       | 4.70E-01         |
| ILMN_1701269 | 0.68261766 | -0.010596  | ATP5C1       | GOTERM_BP_FAT                | <a href="#">cellular protein complex assembly</a>                                                     | 6            | 9.20E-02       | 8.60E-01         |
| ILMN_1652155 | 0.67902696 | -0.0658027 | DHX9         | GOTERM_BP_FAT                | <a href="#">cellular macromolecular complex subunit organization</a>                                  | 7            | 4.30E-01       | 9.90E-01         |
| ILMN_1703894 | 0.6754489  | -0.0718316 | SLX1A        | GOTERM_BP_FAT                | <a href="#">cellular macromolecular complex assembly</a>                                              | 6            | 5.10E-01       | 1.00E+00         |
| ILMN_2373791 | 0.67069197 | -0.0848189 | ENPP2        | <b>Annotation Cluster 18</b> | <b>Enrichment Score: 1.38</b>                                                                         | <b>Count</b> | <b>P_Value</b> | <b>Benjamini</b> |
| ILMN_1662795 | 0.66952646 | -0.1549185 | CA2          | KEGG_PATHWAY                 | <a href="#">Metabolism of xenobiotics by cytochrome P450</a>                                          | 9            | 1.40E-05       | 3.40E-04         |
| ILMN_2369924 | 0.6683334  | -0.0939546 | NDUFB6       | SP_PIR_KEYWORDS              | <a href="#">microsome</a>                                                                             | 5            | 5.70E-02       | 5.30E-01         |
| ILMN_2113957 | 0.6657509  | -0.1576956 | PEX13        | SP_PIR_KEYWORDS              | <a href="#">endoplasmic reticulum</a>                                                                 | 14           | 1.80E-01       | 8.40E-01         |
| ILMN_3211707 | 0.6648283  | -0.1255081 | LOC100306975 | GOTERM_CC_FAT                | <a href="#">microsome</a>                                                                             | 6            | 2.80E-01       | 8.50E-01         |
| ILMN_1749405 | 0.6613723  | -0.0259727 | KIAA1191     | GOTERM_CC_FAT                | <a href="#">vesicular fraction</a>                                                                    | 6            | 3.00E-01       | 8.60E-01         |
| ILMN_3300198 | 0.65759516 | -0.2543633 | MMP24        | GOTERM_CC_FAT                | <a href="#">endoplasmic reticulum</a>                                                                 | 16           | 4.70E-01       | 9.40E-01         |
| ILMN_3183789 | 0.65351874 | -0.0820105 | UQCRCF51     | <b>Annotation Cluster 19</b> | <b>Enrichment Score: 1.37</b>                                                                         | <b>Count</b> | <b>P_Value</b> | <b>Benjamini</b> |
| ILMN_2171295 | 0.65084594 | -0.1587324 | CDK14        | GOTERM_CC_FAT                | <a href="#">mitochondrial matrix</a>                                                                  | 13           | 1.60E-04       | 3.10E-03         |
| ILMN_1764090 | 0.6498643  | -0.1883149 | AK4          |                              |                                                                                                       |              |                |                  |

| Gene ID      | Score      | Gene       | Category       | Term                         | Count                                                   | P_Value      | Benjamini      |                  |
|--------------|------------|------------|----------------|------------------------------|---------------------------------------------------------|--------------|----------------|------------------|
| ILMN_1667670 | 0.6483701  | -0.1738529 | SLC25A15       | GOTERM_CC_FAT                | <a href="#">mitochondrial lumen</a>                     | 13           | 1.60E-04       | 3.10E-03         |
| ILMN_1659524 | 0.6456087  | -0.0406404 | NDUFAF4        | GOTERM_CC_FAT                | <a href="#">membrane-enclosed lumen</a>                 | 29           | 5.10E-01       | 9.60E-01         |
| ILMN_1717357 | 0.6431675  | -0.0651603 | AIFM1          | GOTERM_CC_FAT                | <a href="#">organelle lumen</a>                         | 26           | 7.10E-01       | 9.80E-01         |
| ILMN_1764629 | 0.6428138  | -0.089202  | SLC39A14       | GOTERM_CC_FAT                | <a href="#">intracellular organelle lumen</a>           | 25           | 7.40E-01       | 9.90E-01         |
| ILMN_1754421 | 0.637601   | -0.2653099 | NDUFAF1        | GOTERM_CC_FAT                | <a href="#">nuclear lumen</a>                           | 11           | 1.00E+00       | 1.00E+00         |
| ILMN_1692651 | 0.6365469  | -0.1482794 | PHB            | <b>Annotation Cluster 20</b> | <b>Enrichment Score: 1.33</b>                           | <b>Count</b> | <b>P_Value</b> | <b>Benjamini</b> |
| ILMN_1686985 | 0.6347615  | -0.0879968 | MTM1           | UP_SEQ_FEATURE               | repeat:Solcar 3                                         | 4            | 3.30E-02       | 9.30E-01         |
| ILMN_1761961 | 0.6305251  | -0.0809065 | CCDC90A        | UP_SEQ_FEATURE               | repeat:Solcar 2                                         | 4            | 3.80E-02       | 9.40E-01         |
| ILMN_1729216 | 0.630064   | -0.2543142 | CRYAB          | UP_SEQ_FEATURE               | repeat:Solcar 1                                         | 4            | 3.80E-02       | 9.40E-01         |
| ILMN_1680314 | 0.6282971  | -0.1115901 | TXN            | INTERPRO                     | <a href="#">Mitochondrial substrate carrier</a>         | 4            | 4.20E-02       | 9.80E-01         |
| ILMN_1797974 | 0.62468326 | -0.058843  | AIG1           | INTERPRO                     | <a href="#">Mitochondrial substrate/solute carrier</a>  | 4            | 5.10E-02       | 9.80E-01         |
| ILMN_1733374 | 0.62257844 | -0.1551499 | FAM82B         | INTERPRO                     | <a href="#">Adenine nucleotide translocator 1</a>       | 3            | 5.70E-02       | 9.80E-01         |
| ILMN_1682601 | 0.6207918  | -0.0724094 | HBXIP          | PIR_SUPERFAMILY              | PIRSF002458:ADP,ATP carrier protein                     | 3            | 8.30E-02       | 1.00E+00         |
| ILMN_3285959 | 0.6203924  | -0.1615806 | ST13           | <b>Annotation Cluster 21</b> | <b>Enrichment Score: 1.28</b>                           | <b>Count</b> | <b>P_Value</b> | <b>Benjamini</b> |
| ILMN_1689162 | 0.6197751  | -0.1552239 | ACTR8          | INTERPRO                     | <a href="#">Thioredoxin fold</a>                        | 7            | 4.00E-03       | 6.70E-01         |
| ILMN_1687359 | 0.6122366  | -0.129858  | MRPS23         | INTERPRO                     | <a href="#">Thioredoxin-like</a>                        | 4            | 1.60E-02       | 9.50E-01         |
| ILMN_1678323 | 0.6101367  | -0.0616936 | AASS           | INTERPRO                     | <a href="#">Thioredoxin, conserved site</a>             | 3            | 5.70E-02       | 9.80E-01         |
| ILMN_2389151 | 0.60771495 | -0.0218537 | UGP2           | GOTERM_BP_FAT                | <a href="#">cell redox homeostasis</a>                  | 4            | 6.60E-02       | 8.00E-01         |
| ILMN_3236481 | 0.606375   | -0.1919171 | HIGD1A         | UP_SEQ_FEATURE               | domain:Thioredoxin                                      | 3            | 7.50E-02       | 9.90E-01         |
| ILMN_1669633 | 0.60514337 | -0.1672284 | ACP1           | SP_PIR_KEYWORDS              | <a href="#">Redox-active center</a>                     | 3            | 1.10E-01       | 7.30E-01         |
| ILMN_1753026 | 0.6002035  | -0.3630205 | LPPR1          | GOTERM_BP_FAT                | <a href="#">cellular homeostasis</a>                    | 8            | 5.40E-01       | 1.00E+00         |
| ILMN_1758938 | 0.59658355 | -0.1210987 | SLC31A2        | <b>Annotation Cluster 22</b> | <b>Enrichment Score: 1.24</b>                           | <b>Count</b> | <b>P_Value</b> | <b>Benjamini</b> |
| ILMN_2314417 | 0.59574836 | -0.1271723 | HYAL1          | GOTERM_BP_FAT                | <a href="#">glucose metabolic process</a>               | 8            | 7.70E-03       | 4.00E-01         |
| ILMN_1663220 | 0.59540725 | -0.0697363 | MRPL22         | GOTERM_BP_FAT                | <a href="#">carbohydrate catabolic process</a>          | 6            | 2.30E-02       | 6.00E-01         |
| ILMN_2151281 | 0.59334505 | -0.0981981 | GABARAPL1      | GOTERM_BP_FAT                | <a href="#">pyruvate metabolic process</a>              | 4            | 2.40E-02       | 6.10E-01         |
| ILMN_3237721 | 0.5926957  | -0.1983706 | TMCO7          | GOTERM_BP_FAT                | <a href="#">hexose metabolic process</a>                | 8            | 2.40E-02       | 6.00E-01         |
| ILMN_1743361 | 0.58877814 | -0.0571174 | PTGER3         | GOTERM_BP_FAT                | <a href="#">alcohol catabolic process</a>               | 5            | 3.20E-02       | 6.80E-01         |
| ILMN_2390416 | 0.58876026 | -0.0907461 | BAG6           | GOTERM_BP_FAT                | <a href="#">monosaccharide metabolic process</a>        | 8            | 4.70E-02       | 7.40E-01         |
| ILMN_1746241 | 0.588495   | -0.1362032 | SDHC           | GOTERM_BP_FAT                | <a href="#">carbohydrate biosynthetic process</a>       | 5            | 7.40E-02       | 8.20E-01         |
| ILMN_2213297 | 0.5849724  | -0.3041122 | C11orf54       | GOTERM_BP_FAT                | <a href="#">cellular carbohydrate catabolic process</a> | 4            | 1.30E-01       | 9.20E-01         |
| ILMN_3254984 | 0.5827307  | -0.1347452 | MKKS           | GOTERM_BP_FAT                | <a href="#">glucose catabolic process</a>               | 3            | 2.10E-01       | 9.60E-01         |
| ILMN_1708341 | 0.58206224 | -0.097523  | PDZK1          | GOTERM_BP_FAT                | <a href="#">hexose catabolic process</a>                | 3            | 2.70E-01       | 9.80E-01         |
| ILMN_1912737 | 0.5772733  | -0.1418957 | HIPK2          | GOTERM_BP_FAT                | <a href="#">monosaccharide catabolic process</a>        | 3            | 2.80E-01       | 9.80E-01         |
| ILMN_1779616 | 0.5770341  | -0.1302274 | SUCLG1         | <b>Annotation Cluster 23</b> | <b>Enrichment Score: 1.2</b>                            | <b>Count</b> | <b>P_Value</b> | <b>Benjamini</b> |
| ILMN_1764795 | 0.57696605 | -0.2079817 | FMN2           | GOTERM_CC_FAT                | <a href="#">mitochondrial outer membrane</a>            | 5            | 4.60E-02       | 4.20E-01         |
| ILMN_1764087 | 0.5764295  | -0.1342754 | SYPL1          | GOTERM_CC_FAT                | <a href="#">organelle outer membrane</a>                | 5            | 7.00E-02       | 5.30E-01         |
| ILMN_3251155 | 0.5761449  | -0.1355765 | PCBP2          | GOTERM_CC_FAT                | <a href="#">outer membrane</a>                          | 5            | 7.80E-02       | 5.30E-01         |
| ILMN_1659885 | 0.57567596 | -0.1864566 | ACSS3          | <b>Annotation Cluster 24</b> | <b>Enrichment Score: 1.19</b>                           | <b>Count</b> | <b>P_Value</b> | <b>Benjamini</b> |
| ILMN_1813389 | 0.57451254 | -0.0281603 | MRPS7          | GOTERM_CC_FAT                | <a href="#">organelle ribosome</a>                      | 5            | 5.60E-03       | 8.80E-02         |
| ILMN_1681670 | 0.5726577  | -0.1242306 | SLC25A4        | GOTERM_CC_FAT                | <a href="#">mitochondrial ribosome</a>                  | 5            | 5.60E-03       | 8.80E-02         |
| ILMN_1748661 | 0.5707083  | -0.2201065 | AKT1           | SP_PIR_KEYWORDS              | <a href="#">ribosomal protein</a>                       | 8            | 1.50E-02       | 3.00E-01         |
| ILMN_2050790 | 0.5694572  | -0.1080938 | HSPB2-C11orf52 | SP_PIR_KEYWORDS              | <a href="#">ribonucleoprotein</a>                       | 9            | 3.80E-02       | 4.40E-01         |
| ILMN_2038776 | 0.5688461  | -0.0949912 | TXN            | GOTERM_CC_FAT                | <a href="#">ribosome</a>                                | 8            | 4.30E-02       | 4.40E-01         |
| ILMN_2108590 | 0.56566083 | -0.1029146 | THSD7B         | GOTERM_CC_FAT                | <a href="#">ribosomal subunit</a>                       | 6            | 4.30E-02       | 4.30E-01         |
| ILMN_1917290 | 0.5637789  | -0.2370254 | LAMP2          | GOTERM_BP_FAT                | <a href="#">translation</a>                             | 9            | 1.20E-01       | 9.00E-01         |
| ILMN_1659753 | 0.5637259  | -0.0775361 | LAMP2          | GOTERM_MF_FAT                | <a href="#">structural constituent of ribosome</a>      | 6            | 1.20E-01       | 8.00E-01         |
| ILMN_1708672 | 0.5602941  | -0.1115319 | ACAT2          | GOTERM_CC_FAT                | <a href="#">ribonucleoprotein complex</a>               | 11           | 2.40E-01       | 8.30E-01         |
| ILMN_3239568 | 0.55898    | -0.1504812 | MYLK4          | GOTERM_CC_FAT                | <a href="#">small ribosomal subunit</a>                 | 3            | 2.40E-01       | 8.20E-01         |
| ILMN_2395974 | 0.5571463  | -0.1129833 | PRDX3          | GOTERM_CC_FAT                | <a href="#">large ribosomal subunit</a>                 | 3            | 2.60E-01       | 8.40E-01         |
| ILMN_1668408 | 0.5559756  | -0.1807759 | AIFM1          | GOTERM_MF_FAT                | <a href="#">structural molecule activity</a>            | 10           | 6.50E-01       | 1.00E+00         |
| ILMN_1776104 | 0.5537595  | -0.1644785 | NDUF55         | <b>Annotation Cluster 25</b> | <b>Enrichment Score: 1.18</b>                           | <b>Count</b> | <b>P_Value</b> | <b>Benjamini</b> |
| ILMN_1672004 | 0.5492055  | -0.3571072 | TOB1           | GOTERM_CC_FAT                | <a href="#">vacuole</a>                                 | 10           | 1.40E-02       | 1.90E-01         |
| ILMN_1729930 | 0.54754436 | -0.1312527 | ALOX15         | GOTERM_CC_FAT                | <a href="#">lytic vacuole</a>                           | 7            | 9.70E-02       | 6.00E-01         |
| ILMN_1760575 | 0.5447637  | -0.1687263 | PTP4A1         | GOTERM_CC_FAT                | <a href="#">lysosome</a>                                | 7            | 9.70E-02       | 6.00E-01         |
| ILMN_1781374 | 0.54243946 | 0.00726491 | TUFT1          | SP_PIR_KEYWORDS              | <a href="#">lysosome</a>                                | 5            | 1.50E-01       | 8.10E-01         |
| ILMN_1716053 | 0.5413481  | -0.0155876 | AK2            | <b>Annotation Cluster 26</b> | <b>Enrichment Score: 1.13</b>                           | <b>Count</b> | <b>P_Value</b> | <b>Benjamini</b> |
| ILMN_2211263 | 0.54009885 | -0.1265631 | RFK            | GOTERM_BP_FAT                | <a href="#">lipid oxidation</a>                         | 4            | 2.00E-02       | 5.80E-01         |

|              |            |            |           |
|--------------|------------|------------|-----------|
| ILMN_3229324 | 0.53662777 | -0.1225109 | SGK1      |
| ILMN_3275696 | 0.53566384 | -0.1055134 | SNX5      |
| ILMN_1673026 | 0.53407526 | -0.1165511 | CHCHD3    |
| ILMN_1804656 | 0.5337118  | -0.1619804 | C12orf62  |
| ILMN_1730416 | 0.5325369  | -0.138679  | CYCS      |
| ILMN_1673535 | 0.5323554  | -0.1959483 | MYLK4     |
| ILMN_1789535 | 0.53226197 | -0.1648442 | DHDDS     |
| ILMN_1662316 | 0.5316055  | -0.2208822 | VPS33A    |
| ILMN_1662306 | 0.5277954  | -0.0726951 | RABL3     |
| ILMN_1681890 | 0.52750564 | -0.0092852 | DYNLT3    |
| ILMN_1812312 | 0.5266838  | -0.0266107 | NDUFS4    |
| ILMN_1786388 | 0.524405   | -0.0741832 | RNF113A   |
| ILMN_1800659 | 0.5241793  | -0.0158091 | PGM1      |
| ILMN_2233401 | 0.51928926 | -0.1372421 | FTHL3P    |
| ILMN_1780799 | 0.5191908  | -0.282548  | ENPP2     |
| ILMN_1669851 | 0.5184017  | -0.1055392 | STAG3L4   |
| ILMN_1779751 | 0.51746875 | -0.0576643 | C7orf55   |
| ILMN_2395969 | 0.51736766 | -0.0928268 | PRDX3     |
| ILMN_1838313 | 0.5166446  | -0.0301759 | LRRC8B    |
| ILMN_2187718 | 0.51658463 | -0.2029427 | COX17     |
| ILMN_2313821 | 0.51613426 | -0.1150754 | AIFM1     |
| ILMN_1674344 | 0.51510006 | -0.1477752 | PARD6G    |
| ILMN_1729775 | 0.5132178  | -0.0708344 | OPA1      |
| ILMN_1673282 | 0.51235974 | -0.2129595 | LAMP2     |
| ILMN_2405642 | 0.51151264 | -0.1576971 | DHDDS     |
| ILMN_1810604 | 0.50765324 | -0.2420962 | ELMOD1    |
| ILMN_1699728 | 0.5057842  | -0.1541611 | BTD       |
| ILMN_1804673 | 0.50361586 | -0.1682482 | SLC16A4   |
| ILMN_1749641 | 0.5027475  | -0.1186625 | FBXO3     |
| ILMN_1690386 | 0.5009279  | -0.1851168 | CSRP2BP   |
| ILMN_1742887 | 0.4983462  | -0.1662009 | HBXIP     |
| ILMN_1778523 | 0.4969263  | -0.188863  | KLF9      |
| ILMN_3303673 | 0.49638113 | -0.0317633 | LOC729852 |
| ILMN_1701749 | 0.4942459  | -0.214608  | UQCRCF51  |
| ILMN_2391231 | 0.49253243 | -0.1014882 | SORD      |
| ILMN_2366246 | 0.4909737  | -0.0665305 | SEC23B    |
| ILMN_1663840 | 0.4890622  | -0.1559719 | OR2T29    |
| ILMN_3244070 | 0.4888593  | -0.0898611 | URG7      |
| ILMN_1728132 | 0.4878155  | -0.1961908 | LDHB      |
| ILMN_1723846 | 0.4874211  | -0.1976832 | METTTL21B |
| ILMN_1714401 | 0.4864093  | -0.035512  | SNX27     |
| ILMN_2195665 | 0.48557532 | -0.0631011 | PANK3     |
| ILMN_1771805 | 0.48275137 | -0.0504277 | ELK4      |
| ILMN_2363273 | 0.47807437 | -0.0603694 | ZNF226    |
| ILMN_1666471 | 0.4752401  | -0.2127193 | UQCRCQ    |
| ILMN_1793474 | 0.47494924 | -0.1218603 | INSIG1    |
| ILMN_2189993 | 0.47404963 | -0.0843789 | MRPS35    |
| ILMN_1788738 | 0.4736591  | -0.1682116 | ZNRF3     |
| ILMN_1789283 | 0.47337997 | -0.0368182 | PPP2R5C   |
| ILMN_1722698 | 0.46818358 | -0.2791058 | RCHY1     |
| ILMN_2081335 | 0.46583247 | -0.0924524 | C7orf44   |
| ILMN_1782754 | 0.45977533 | -0.1490223 | PAGE4     |
| ILMN_1793966 | 0.4575815  | -0.1328245 | BOLA1     |
| ILMN_1744059 | 0.45672715 | -0.0715276 | DCTN6     |
| ILMN_2274180 | 0.4565025  | -0.1387646 | MKKS      |
| ILMN_1696911 | 0.45303917 | -0.1904686 | FTH1      |
| ILMN_1692707 | 0.44214332 | -0.1433443 | C2orf79   |

**Annotation Cluster 27 Enrichment Score: 1.07**

|               |                                                  |
|---------------|--------------------------------------------------|
| GOTERM_BP_FAT | <a href="#">fatty acid oxidation</a>             |
| GOTERM_BP_FAT | <a href="#">fatty acid metabolic process</a>     |
| GOTERM_BP_FAT | <a href="#">lipid modification</a>               |
| GOTERM_BP_FAT | <a href="#">fatty acid catabolic process</a>     |
| GOTERM_BP_FAT | <a href="#">cellular lipid catabolic process</a> |
| GOTERM_BP_FAT | <a href="#">lipid catabolic process</a>          |

**Annotation Cluster 28 Enrichment Score: 1.03**

|               |                                                      |
|---------------|------------------------------------------------------|
| GOTERM_BP_FAT | <a href="#">response to endogenous stimulus</a>      |
| GOTERM_BP_FAT | <a href="#">response to organic substance</a>        |
| GOTERM_BP_FAT | <a href="#">response to hormone stimulus</a>         |
| GOTERM_BP_FAT | <a href="#">response to steroid hormone stimulus</a> |
| GOTERM_BP_FAT | <a href="#">response to abiotic stimulus</a>         |
| GOTERM_BP_FAT | <a href="#">response to estrogen stimulus</a>        |

**Annotation Cluster 29 Enrichment Score: 1.02**

|               |                                                            |
|---------------|------------------------------------------------------------|
| GOTERM_BP_FAT | <a href="#">carbohydrate biosynthetic process</a>          |
| GOTERM_BP_FAT | <a href="#">cellular carbohydrate biosynthetic process</a> |
| GOTERM_BP_FAT | <a href="#">alcohol biosynthetic process</a>               |

**Annotation Cluster 30 Enrichment Score: 1**

|                 |                                                                              |
|-----------------|------------------------------------------------------------------------------|
| GOTERM_MF_FAT   | <a href="#">phosphoprotein phosphatase activity</a>                          |
| GOTERM_MF_FAT   | <a href="#">phosphatase activity</a>                                         |
| GOTERM_MF_FAT   | <a href="#">protein tyrosine phosphatase activity</a>                        |
| SP_PIR_KEYWORDS | <a href="#">protein phosphatase</a>                                          |
| GOTERM_BP_FAT   | <a href="#">protein amino acid dephosphorylation</a>                         |
| GOTERM_BP_FAT   | <a href="#">dephosphorylation</a>                                            |
| UP_SEQ_FEATURE  | active site:Phosphocysteine intermediate                                     |
| INTERPRO        | <a href="#">Protein-tyrosine phosphatase</a>                                 |
| INTERPRO        | <a href="#">Dual-specific/protein-tyrosine phosphatase, conserved region</a> |
| INTERPRO        | <a href="#">Protein-tyrosine phosphatase, active site</a>                    |

|               |                                    |
|---------------|------------------------------------|
| GOTERM_CC_FAT | <a href="#">cell fraction</a>      |
| GOTERM_CC_FAT | <a href="#">insoluble fraction</a> |
| GOTERM_CC_FAT | <a href="#">membrane fraction</a>  |

| Count | P_Value  | Benjamini |
|-------|----------|-----------|
| 4     | 2.00E-02 | 5.80E-01  |
| 8     | 2.80E-02 | 6.50E-01  |
| 4     | 8.20E-02 | 8.40E-01  |
| 3     | 9.90E-02 | 8.70E-01  |
| 3     | 3.10E-01 | 9.90E-01  |
| 4     | 4.70E-01 | 1.00E+00  |
| 13    | 1.70E-02 | 5.40E-01  |
| 18    | 3.90E-02 | 7.10E-01  |
| 10    | 9.50E-02 | 8.70E-01  |
| 6     | 1.60E-01 | 9.40E-01  |
| 9     | 1.80E-01 | 9.50E-01  |
| 4     | 2.00E-01 | 9.60E-01  |
| 8     | 1.40E-02 | 3.70E-01  |
| 10    | 1.60E-02 | 3.80E-01  |
| 6     | 2.30E-02 | 4.40E-01  |
| 6     | 3.30E-02 | 4.20E-01  |
| 5     | 1.30E-01 | 9.20E-01  |
| 5     | 1.90E-01 | 9.50E-01  |
| 3     | 3.20E-01 | 1.00E+00  |
| 3     | 3.40E-01 | 1.00E+00  |
| 3     | 3.50E-01 | 1.00E+00  |
| 3     | 3.80E-01 | 1.00E+00  |
| 24    | 5.40E-02 | 4.50E-01  |
| 18    | 1.20E-01 | 6.70E-01  |
| 17    | 1.50E-01 | 6.90E-01  |

|              |            |            |           |
|--------------|------------|------------|-----------|
| ILMN_2173835 | 0.4409039  | -0.1652497 | FTHL3P    |
| ILMN_1722662 | 0.43740088 | -0.2066791 | RAD23B    |
| ILMN_2380754 | 0.43717372 | -0.0433467 | CCNG1     |
| ILMN_1661945 | 0.4368875  | -0.0505693 | C14orf156 |
| ILMN_1811933 | 0.4361068  | -0.3302737 | SHMT1     |
| ILMN_2356031 | 0.43607378 | -0.1596443 | RNF121    |
| ILMN_1765644 | 0.4335481  | -0.1304037 | COMMD8    |
| ILMN_1761850 | 0.43353033 | -0.1006181 | ATRN      |
| ILMN_2083567 | 0.4328398  | -0.1518936 | PHLPP2    |
| ILMN_1665887 | 0.42973006 | -0.1064787 | WDR61     |
| ILMN_1778631 | 0.42883274 | -0.0766349 | DEFB136   |
| ILMN_1771620 | 0.42253804 | -0.0876486 | SNRPB2    |
| ILMN_1662263 | 0.42182165 | -0.1539048 | MDP1      |
| ILMN_2341952 | 0.41888434 | -0.0459762 | MRPL35    |
| ILMN_1742705 | 0.41700476 | -0.1381625 | SLC39A11  |
| ILMN_1726769 | 0.41590095 | -0.1434764 | CNDP2     |
| ILMN_1720838 | 0.4097488  | -0.063075  | DECR1     |
| ILMN_1815319 | 0.40853834 | -0.1554309 | CMTM4     |
| ILMN_1701331 | 0.40701497 | -0.0424514 | UBE2M     |
| ILMN_1744432 | 0.40570152 | -0.0886855 | COX8C     |
| ILMN_1737862 | 0.4046042  | -0.2743336 | PSMB4     |
| ILMN_1730391 | 0.40252173 | -0.2537092 | MRPS18A   |
| ILMN_1766762 | 0.40246844 | -0.128025  | DYNLRB1   |
| ILMN_3297880 | 0.3999284  | -0.0981417 | SEC13     |
| ILMN_2294976 | 0.39817518 | -0.0649271 | ANG       |
| ILMN_1799367 | 0.3968433  | -0.0441484 | TMX2      |
| ILMN_1777644 | 0.3948608  | -0.1542635 | INPP5J    |
| ILMN_2097421 | 0.39421952 | -0.0463418 | MRPL51    |
| ILMN_2225537 | 0.39069605 | -0.1320155 | PTGR1     |
| ILMN_2332713 | 0.3895538  | -0.1557675 | SLC25A3   |
| ILMN_2081863 | 0.3872285  | -0.114128  | NDUFB4    |
| ILMN_1756355 | 0.3868723  | -0.131216  | NDUFS3    |
| ILMN_1805536 | 0.3865556  | -0.1555171 | LOC649395 |
| ILMN_1741572 | 0.38331878 | -0.055803  | AKAP8     |
| ILMN_1669818 | 0.38285017 | -0.131959  | ESD       |
| ILMN_1759729 | 0.38075674 | -0.1003085 | NDUFA8    |
| ILMN_1891857 | 0.37954158 | -0.1100024 | RAB2A     |
| ILMN_1696974 | 0.37809336 | -0.1079748 | ANG       |
| ILMN_2157510 | 0.37748522 | -0.1191362 | RDHS      |
| ILMN_2096012 | 0.37461853 | -0.213255  | UHMK1     |
| ILMN_2133713 | 0.36997807 | -0.0800922 | FAM76A    |
| ILMN_1666004 | 0.36997592 | -0.0599306 | WASL      |
| ILMN_1742250 | 0.36988783 | -0.1800445 | CCNH      |
| ILMN_1721989 | 0.36958754 | -0.066355  | ATP5F1    |
| ILMN_1737738 | 0.363845   | -0.1494603 | NDUFA12   |
| ILMN_1770412 | 0.35878038 | -0.1046594 | AHCYL1    |
| ILMN_2096322 | 0.35643977 | -0.0885951 | ADIPOR1   |
| ILMN_1811327 | 0.32078636 | -0.1003164 | MRPL27    |
| ILMN_1796235 | 0.32004058 | -0.2009104 | CIRH1A    |
| ILMN_2044927 | 0.31497407 | -0.1327809 | RNF5      |
| ILMN_1790973 | 0.30834568 | -0.0419093 | CDS2      |
| ILMN_1764494 | 0.26841974 | -0.1058139 | ATP5A1    |
| ILMN_1656145 | 0.24360895 | -0.1872449 | GOT1      |
