# Supplementary material for: Intrarenal activation of adaptive immune effectors is associated with tubular damage and impaired renal function in lupus nephritis
Source: PubMed Central journal article supplement (PMC6241616; doi:10.1136/annrheumdis-2018-213485), 2018-07-31
Supplement: annrheumdis-2018-213485supp006.pdf [file annrheumdis-2018-213485supp006.pdf]

**Supplementary Table 3 : Transcriptomic profiling singles out a subgroup of SLE kidney biopsy samples with decreased eGFR**

A cluster of SLE kidney biopsy samples, identified by hierarchical clustering algorithm (Pearson-centered algorithm, Ward's linkage rule) is characterized by the overexpression of 271 transcripts (by moderated t test, with Bonferroni correction for multiple comparisons) compared to the other lupus samples, significantly enriched in the indicated pathways.

**Transcripts**

| Identifier   | [Control]  | [SLE]     | Gene Symbol    |
|--------------|------------|-----------|----------------|
| ILMN_1654319 | -0.3232504 | 1.9405183 | HAPLN3         |
| ILMN_1738116 | -0.2354067 | 1.9201676 | TMEM119        |
| ILMN_1804601 | -0.2589666 | 1.8242207 | DKFZp686O16217 |
| ILMN_1659800 | -0.2759814 | 1.7896557 | BCL11A         |
| ILMN_1718936 | -0.2632236 | 1.6821613 | LST1           |
| ILMN_1704286 | -0.3620017 | 1.6446545 | FXYD5          |
| ILMN_2178226 | -0.2631313 | 1.5874728 | KRT86          |
| ILMN_2316236 | -0.3898594 | 1.5715406 | HOPX           |
| ILMN_1685403 | -0.2286288 | 1.5471464 | MMP7           |
| ILMN_1701424 | -0.4379956 | 1.504757  | LAMC2          |
| ILMN_1778977 | -0.2593867 | 1.5005594 | TYROBP         |
| ILMN_3307693 | -0.9245362 | 1.479397  | WFDC2          |
| ILMN_2325837 | -0.4301998 | 1.4455804 | CD3D           |
| ILMN_1770673 | -0.2988024 | 1.427377  | AKNA           |
| ILMN_1886655 | -0.5120298 | 1.4127944 | TCRVB          |
| ILMN_1715760 | -0.2148992 | 1.4113554 | HUAT           |
| ILMN_1727284 | -0.1995767 | 1.3429725 | CD4            |
| ILMN_2280548 | -0.3113598 | 1.32024   | FYB            |
| ILMN_1769129 | -1.2588445 | 1.3199118 | CCL19          |
| ILMN_2254635 | -0.901885  | 1.3150588 | ITGAX          |
| ILMN_1659688 | -0.3078076 | 1.3150438 | LGALS3BP       |
| ILMN_1731233 | -0.3580598 | 1.314427  | GZMH           |
| ILMN_1772359 | -0.3015788 | 1.306691  | LAPTM5         |
| ILMN_1777190 | -0.212863  | 1.2945279 | CFD            |
| ILMN_2320888 | -0.2540839 | 1.2926085 | CXCR4          |
| ILMN_1740015 | -0.2876653 | 1.27568   | CD14           |
| ILMN_2232177 | -0.5919564 | 1.2677429 | ACTN1          |
| ILMN_1791726 | -0.1165403 | 1.2661247 | TUBB3          |
| ILMN_1677505 | -0.3786097 | 1.2465667 | CCL21          |
| ILMN_2393765 | -1.3157812 | 1.2446996 | IGLL1          |
| ILMN_2192072 | -0.4492103 | 1.2325146 | MMP7           |
| ILMN_2088124 | -0.6159105 | 1.2310873 | TMEM154        |
| ILMN_2400947 | -0.2970516 | 1.2233969 | CELF2          |
| ILMN_1682993 | -0.3171521 | 1.2221096 | NGK7           |
| ILMN_1773964 | -0.3415281 | 1.2133846 | H1FX           |
| ILMN_1656868 | -0.5244166 | 1.2129158 | NPIPL3         |
| ILMN_1659913 | -0.2276194 | 1.2071422 | ISG20          |
| ILMN_1700935 | -0.5817646 | 1.2067223 | HAS2           |
| ILMN_2109489 | -0.3629279 | 1.1954819 | GZMB           |
| ILMN_1719759 | -0.4349685 | 1.1886253 | TNC            |
| ILMN_1715508 | -0.4731118 | 1.1747693 | NNMT           |
| ILMN_1668039 | -0.3205495 | 1.1702818 | GYPC           |
| ILMN_2061043 | -0.5361143 | 1.1639661 | CD48           |
| ILMN_1801504 | -0.523013  | 1.1615633 | RUNX1          |
| ILMN_3246766 | -0.2767946 | 1.1546525 | NPIPL3         |
| ILMN_2366041 | -0.6716672 | 1.1506507 | ITM2C          |
| ILMN_1718558 | -0.4340115 | 1.1472871 | PARP12         |
| ILMN_2384544 | -0.2476885 | 1.1429716 | ADAM15         |

**Pathways**

| Annotation Cluster   | Enrichment Score       | Count           | P_Value  | Benjamini |          |
|----------------------|------------------------|-----------------|----------|-----------|----------|
| Annotation Cluster 1 | Enrichment Score: 7.58 | SP_PIR_KEYWORDS | 84       | 3.80E-13  | 1.20E-10 |
|                      |                        | UP_SEQ_FEATURE  | 84       | 5.40E-13  | 5.30E-10 |
|                      |                        | SP_PIR_KEYWORDS | 68       | 1.90E-08  | 3.00E-06 |
|                      |                        | UP_SEQ_FEATURE  | 66       | 3.40E-08  | 1.70E-05 |
|                      |                        | SP_PIR_KEYWORDS | 84       | 5.70E-07  | 3.10E-05 |
|                      |                        | SP_PIR_KEYWORDS | 43       | 2.20E-06  | 8.90E-05 |
|                      |                        | GOTERM_CC_FAT   | 51       | 2.50E-05  | 2.00E-03 |
| Annotation Cluster 2 | Enrichment Score: 4.94 | UP_SEQ_FEATURE  | 75       | 5.40E-05  | 1.70E-02 |
|                      |                        | GOTERM_BP_FAT   | 27       | 3.20E-06  | 1.90E-03 |
|                      |                        | GOTERM_BP_FAT   | 27       | 3.30E-06  | 1.40E-03 |
| Annotation Cluster 3 | Enrichment Score: 4.58 | SP_PIR_KEYWORDS | 16       | 1.40E-04  | 4.10E-03 |
|                      |                        | GOTERM_BP_FAT   | 27       | 2.80E-07  | 2.50E-04 |
|                      |                        | GOTERM_BP_FAT   | 20       | 1.20E-04  | 1.60E-02 |
| Annotation Cluster 4 | Enrichment Score: 3.74 | GOTERM_BP_FAT   | 14       | 5.30E-04  | 3.10E-02 |
|                      |                        | SP_PIR_KEYWORDS | 16       | 1.70E-07  | 1.80E-05 |
|                      |                        | SP_PIR_KEYWORDS | 43       | 2.20E-06  | 8.90E-05 |
|                      |                        | GOTERM_CC_FAT   | 33       | 3.90E-06  | 9.50E-04 |
|                      |                        | GOTERM_CC_FAT   | 17       | 1.20E-05  | 1.40E-03 |
|                      |                        | GOTERM_CC_FAT   | 51       | 2.50E-05  | 2.00E-03 |
|                      |                        | GOTERM_CC_FAT   | 17       | 3.00E-05  | 1.80E-03 |
|                      |                        | GOTERM_CC_FAT   | 22       | 6.50E-04  | 1.40E-02 |
|                      |                        | KEGG_PATHWAY    | 6        | 1.80E-02  | 1.10E-01 |
|                      |                        | GOTERM_CC_FAT   | 5        | 2.40E-02  | 2.80E-01 |
| Annotation Cluster 5 | Enrichment Score: 3.62 | GOTERM_CC_FAT   | 6        | 2.50E-02  | 2.80E-01 |
|                      |                        | SP_PIR_KEYWORDS | 3        | 7.60E-02  | 4.10E-01 |
|                      |                        | GOTERM_BP_FAT   | 15       | 5.50E-05  | 9.50E-03 |
|                      |                        | GOTERM_BP_FAT   | 13       | 1.60E-04  | 1.80E-02 |
|                      |                        | GOTERM_BP_FAT   | 15       | 1.70E-04  | 1.70E-02 |
|                      |                        | GOTERM_BP_FAT   | 8        | 3.60E-04  | 2.70E-02 |
|                      |                        | GOTERM_BP_FAT   | 10       | 4.80E-04  | 3.20E-02 |
| Annotation Cluster 6 | Enrichment Score: 3.27 | GOTERM_BP_FAT   | 8        | 6.60E-04  | 3.50E-02 |
|                      |                        | GOTERM_BP_FAT   | 14       | 2.20E-05  | 4.80E-03 |
|                      |                        | GOTERM_BP_FAT   | 13       | 1.10E-04  | 1.50E-02 |
|                      |                        | GOTERM_BP_FAT   | 10       | 1.70E-04  | 1.70E-02 |
|                      |                        | GOTERM_BP_FAT   | 8        | 3.00E-04  | 2.50E-02 |
|                      |                        | GOTERM_BP_FAT   | 7        | 3.80E-04  | 2.70E-02 |
|                      |                        | GOTERM_BP_FAT   | 9        | 5.10E-04  | 3.20E-02 |
|                      |                        | GOTERM_BP_FAT   | 7        | 6.40E-04  | 3.70E-02 |
|                      |                        | GOTERM_BP_FAT   | 7        | 6.40E-04  | 3.70E-02 |
|                      |                        | GOTERM_BP_FAT   | 7        | 9.50E-04  | 4.60E-02 |
| GOTERM_BP_FAT        | 6                      | 9.80E-04        | 4.50E-02 |           |          |
| GOTERM_BP_FAT        | 7                      | 1.10E-03        | 5.10E-02 |           |          |
| GOTERM_BP_FAT        | 5                      | 5.50E-03        | 1.50E-01 |           |          |

| ILMN_ID      | Score      | Gene                    | Annotation Cluster   | Enrichment Score                                                                                          | Term                 | Count                                                                           | P_Value         | Benjamini                                                   |          |          |          |
|--------------|------------|-------------------------|----------------------|-----------------------------------------------------------------------------------------------------------|----------------------|---------------------------------------------------------------------------------|-----------------|-------------------------------------------------------------|----------|----------|----------|
| ILMN_1805737 | -0.4868437 | 1.1419221 PFKP          | Annotation Cluster 7 | Enrichment Score: 2.61                                                                                    | GOTERM_BP_FAT        | <a href="#">immunoglobulin mediated immune response</a>                         | 5               | 6.30E-03                                                    | 1.50E-01 |          |          |
| ILMN_2114720 | -0.2910049 | 1.1358421 SLPI          |                      |                                                                                                           | SP_PIR_KEYWORDS      | <a href="#">immune response</a>                                                 | 15              | 4.20E-07                                                    | 3.30E-05 |          |          |
| ILMN_1695851 | -0.2123577 | 1.1309191 PARVG         |                      |                                                                                                           | KEGG_PATHWAY         | <a href="#">Cell adhesion molecules (CAMs)</a>                                  | 12              | 2.40E-05                                                    | 2.40E-03 |          |          |
| ILMN_1762594 | -0.2364039 | 1.1272446 NOD2          |                      |                                                                                                           | BIOCARTA             | <a href="#">B Lymphocyte Cell Surface Molecules</a>                             | 5               | 8.60E-05                                                    | 2.80E-03 |          |          |
| ILMN_1758895 | -0.5701722 | 1.1245126 CTSK          |                      |                                                                                                           | UP_SEQ_FEATURE       | domain:Ig-like C1-type                                                          | 6               | 1.00E-04                                                    | 2.40E-02 |          |          |
| ILMN_1687301 | -0.6841173 | 1.1204166 VCAN          |                      |                                                                                                           | SP_PIR_KEYWORDS      | <a href="#">heterodimer</a>                                                     | 8               | 2.10E-04                                                    | 5.50E-03 |          |          |
| ILMN_1678827 | -0.1769902 | 1.0991265 SPDYE7P       |                      |                                                                                                           | KEGG_PATHWAY         | <a href="#">Allograft rejection</a>                                             | 6               | 4.40E-04                                                    | 1.10E-02 |          |          |
| ILMN_1695404 | -0.2068565 | 1.0963432 LY6E          |                      |                                                                                                           | BIOCARTA             | <a href="#">Bystander B Cell Activation</a>                                     | 4               | 6.80E-04                                                    | 1.30E-02 |          |          |
| ILMN_1680453 | -0.6901841 | 1.0810174 ITM2C         |                      |                                                                                                           |                      | <a href="#">Immunoglobulin/major histocompatibility complex, conserved site</a> | 7               | 8.10E-04                                                    | 1.90E-01 |          |          |
| ILMN_1747593 | -0.5384941 | 1.079707 ISLR           |                      |                                                                                                           | GOTERM_BP_FAT        | <a href="#">antigen processing and presentation</a>                             | 7               | 9.50E-04                                                    | 4.60E-02 |          |          |
| ILMN_2387496 | -0.6742429 | 1.0743917 COAS3         |                      |                                                                                                           | UP_SEQ_FEATURE       | region of interest:Connecting peptide                                           | 5               | 1.00E-03                                                    | 1.50E-01 |          |          |
| ILMN_1749372 | -0.2665476 | 1.0736879 GGT5          |                      |                                                                                                           | UP_SEQ_FEATURE       | region of interest:Alpha-2                                                      | 4               | 1.60E-03                                                    | 2.00E-01 |          |          |
| ILMN_1767556 | -0.3998735 | 1.0715685 C10orf10      |                      |                                                                                                           | UP_SEQ_FEATURE       | region of interest:Alpha-1                                                      | 4               | 1.60E-03                                                    | 2.00E-01 |          |          |
| ILMN_1736178 | -0.4081671 | 1.068581 AEBP1          |                      |                                                                                                           | INTERPRO             | <a href="#">Immunoglobulin C1-set</a>                                           | 6               | 1.70E-03                                                    | 2.50E-01 |          |          |
| ILMN_1772218 | -0.4511487 | 1.0665296 HLA-DPA1      |                      |                                                                                                           | GOTERM_MF_FAT        | <a href="#">MHC class II receptor activity</a>                                  | 4               | 1.90E-03                                                    | 2.10E-01 |          |          |
| ILMN_2408987 | -1.0307062 | 1.0658907 SMARCD3       |                      |                                                                                                           | KEGG_PATHWAY         | <a href="#">Autoimmune thyroid disease</a>                                      | 6               | 2.20E-03                                                    | 4.40E-02 |          |          |
| ILMN_2376205 | -0.7288805 | 1.0646546 LTB           |                      |                                                                                                           | BIOCARTA             | <a href="#">Antigen Dependent B Cell Activation</a>                             | 4               | 2.50E-03                                                    | 4.10E-02 |          |          |
| ILMN_2376204 | -0.3408106 | 1.0642538 LTB           |                      |                                                                                                           | SMART                | <a href="#">IGc1</a>                                                            | 6               | 4.80E-03                                                    | 4.90E-01 |          |          |
| ILMN_1750805 | -0.318508  | 1.0515127 ARHGAP30      |                      |                                                                                                           | KEGG_PATHWAY         | <a href="#">Graft-versus-host disease</a>                                       | 5               | 5.30E-03                                                    | 7.40E-02 |          |          |
| ILMN_1752755 | -0.7749436 | 1.049824 VWF            |                      |                                                                                                           | SP_PIR_KEYWORDS      | <a href="#">mhc ii</a>                                                          | 4               | 5.60E-03                                                    | 8.10E-02 |          |          |
| ILMN_2400935 | -0.4563044 | 1.0462416 TAGLN         |                      |                                                                                                           | GOTERM_BP_FAT        | <a href="#">antigen processing and presentation of peptide antigen</a>          | 4               | 6.40E-03                                                    | 1.50E-01 |          |          |
| ILMN_1799062 | -0.4098382 | 1.0438011 NFKB2         |                      |                                                                                                           | KEGG_PATHWAY         | <a href="#">Type I diabetes mellitus</a>                                        | 5               | 6.90E-03                                                    | 8.50E-02 |          |          |
| ILMN_1769201 | -0.4936057 | 1.0263821 ELF3          |                      |                                                                                                           | GOTERM_CC_FAT        | <a href="#">MHC protein complex</a>                                             | 5               | 8.40E-03                                                    | 1.30E-01 |          |          |
| ILMN_1708858 | -0.7217799 | 1.0184444 CSNK1E        |                      |                                                                                                           | KEGG_PATHWAY         | <a href="#">Systemic lupus erythematosus</a>                                    | 7               | 9.10E-03                                                    | 9.90E-02 |          |          |
| ILMN_1798181 | -0.4995381 | 1.0047315 IRF7          |                      |                                                                                                           | KEGG_PATHWAY         | <a href="#">Viral myocarditis</a>                                               | 6               | 9.20E-03                                                    | 9.00E-02 |          |          |
| ILMN_2353202 | -0.5386101 | 1.0010649 PTK7          |                      | <a href="#">antigen processing and presentation of peptide or polysaccharide antigen via MHC class II</a> | 4                    | 1.00E-02                                                                        | 2.10E-01        |                                                             |          |          |          |
| ILMN_1803686 | -0.3430935 | 1.0008456 ADA           | KEGG_PATHWAY         | <a href="#">Intestinal immune network for IgA production</a>                                              | 5                    | 1.20E-02                                                                        | 8.90E-02        |                                                             |          |          |          |
| ILMN_1653652 | -0.3883707 | 1.0007647 PTPRC         | KEGG_PATHWAY         | <a href="#">Asthma</a>                                                                                    | 4                    | 1.50E-02                                                                        | 1.10E-01        |                                                             |          |          |          |
| ILMN_2413779 | -0.4982294 | 0.9999508 SEZ6L2        | KEGG_PATHWAY         | <a href="#">Antigen processing and presentation</a>                                                       | 6                    | 1.70E-02                                                                        | 1.10E-01        |                                                             |          |          |          |
| ILMN_1778668 | -0.3758617 | 0.99820423 TAGLN        | BIOCARTA             | <a href="#">Antigen Processing and Presentation</a>                                                       | 3                    | 2.30E-02                                                                        | 1.90E-01        |                                                             |          |          |          |
| ILMN_1744487 | -0.5831665 | 0.9951158 C1QTNF5       | INTERPRO             | <a href="#">MHC class II, alpha/beta chain, N-terminal</a>                                                | 3                    | 3.10E-02                                                                        | 6.40E-01        |                                                             |          |          |          |
| ILMN_2261416 | -0.3355521 | 0.99143887 CD3D         | GOTERM_CC_FAT        | <a href="#">MHC class II protein complex</a>                                                              | 3                    | 6.20E-02                                                                        | 5.10E-01        |                                                             |          |          |          |
| ILMN_1765649 | -0.2809076 | 0.9906851 IRF3          | PIR_SUPERFAMILY      | PIRSF001991:class II histocompatibility antigen                                                           | 3                    | 6.30E-02                                                                        | 8.20E-01        |                                                             |          |          |          |
| ILMN_1745148 | -0.4152842 | 0.9902657 ZNFX1         | BIOCARTA             | <a href="#">Th1/Th2 Differentiation</a>                                                                   | 3                    | 8.30E-02                                                                        | 4.80E-01        |                                                             |          |          |          |
| ILMN_2117508 | -0.4875161 | 0.9897423 CTHRC1        | Annotation Cluster 8 | Enrichment Score: 2.53                                                                                    | SP_PIR_KEYWORDS      | <a href="#">transmembrane protein</a>                                           | 25              | 5.70E-07                                                    | 3.60E-05 |          |          |
| ILMN_2125747 | -0.2444001 | 0.9888768 CORO1A        |                      |                                                                                                           | GOTERM_CC_FAT        | <a href="#">integral to plasma membrane</a>                                     | 35              | 4.70E-05                                                    | 2.30E-03 |          |          |
| ILMN_1785005 | -0.3391531 | 0.98682004 NCF4         |                      |                                                                                                           | GOTERM_CC_FAT        | <a href="#">plasma membrane part</a>                                            | 53              | 6.70E-05                                                    | 2.70E-03 |          |          |
| ILMN_1717793 | -0.4363792 | 0.9829914 C19orf33      |                      |                                                                                                           | GOTERM_CC_FAT        | <a href="#">intrinsic to plasma membrane</a>                                    | 35              | 7.40E-05                                                    | 2.60E-03 |          |          |
| ILMN_1676099 | -0.1844222 | 0.98020583 SPON2        |                      |                                                                                                           | GOTERM_CC_FAT        | <a href="#">plasma membrane</a>                                                 | 75              | 5.70E-04                                                    | 1.40E-02 |          |          |
| ILMN_1768311 | -0.2497203 | 0.97880334 NPIPL3       |                      |                                                                                                           | UP_SEQ_FEATURE       | topological domain:Extracellular                                                | 49              | 2.30E-03                                                    | 2.20E-01 |          |          |
| ILMN_1775762 | -0.2994535 | 0.975834 GNAI2          |                      |                                                                                                           | SP_PIR_KEYWORDS      | <a href="#">membrane</a>                                                        | 93              | 4.90E-03                                                    | 7.50E-02 |          |          |
| ILMN_1689968 | -0.412196  | 0.97220707 PLEKHO2      |                      |                                                                                                           | UP_SEQ_FEATURE       | topological domain:Cytoplasmic                                                  | 53              | 2.20E-02                                                    | 6.80E-01 |          |          |
| ILMN_1687358 | -0.2986337 | 0.9660672 Tmprss4       |                      |                                                                                                           | SP_PIR_KEYWORDS      | <a href="#">transmembrane</a>                                                   | 70              | 5.90E-02                                                    | 3.60E-01 |          |          |
| ILMN_1704294 | -0.2695893 | 0.96394974 CDH3         |                      |                                                                                                           | UP_SEQ_FEATURE       | transmembrane region                                                            | 69              | 7.00E-02                                                    | 9.10E-01 |          |          |
| ILMN_1778319 | -0.3999426 | 0.95954514 DMKN         |                      |                                                                                                           | SP_PIR_KEYWORDS      | <a href="#">receptor</a>                                                        | 26              | 7.70E-02                                                    | 4.00E-01 |          |          |
| ILMN_1662799 | -0.2291535 | 0.95948136 GPSM3        |                      |                                                                                                           | GOTERM_CC_FAT        | <a href="#">integral to membrane</a>                                            | 77              | 4.40E-01                                                    | 9.30E-01 |          |          |
| ILMN_1723978 | -0.5471423 | 0.9585848 LGALS1        |                      |                                                                                                           | GOTERM_CC_FAT        | <a href="#">intrinsic to membrane</a>                                           | 78              | 5.40E-01                                                    | 9.50E-01 |          |          |
| ILMN_1673357 | -0.334264  | 0.95752394 SLA2         |                      |                                                                                                           | Annotation Cluster 9 | Enrichment Score: 2.17                                                          | SP_PIR_KEYWORDS | <a href="#">protein complex assembly</a>                    | 17       | 1.60E-03 | 6.30E-02 |
| ILMN_1730670 | -0.4762125 | 0.95550716 FSTL3        |                      |                                                                                                           |                      |                                                                                 | GOTERM_BP_FAT   | <a href="#">protein complex biogenesis</a>                  | 17       | 1.60E-03 | 6.30E-02 |
| ILMN_1691662 | -0.2668986 | 0.95518255 LOC100101266 |                      |                                                                                                           |                      |                                                                                 | GOTERM_BP_FAT   | <a href="#">macromolecular complex assembly</a>             | 18       | 9.70E-03 | 2.00E-01 |
| ILMN_1778941 | -0.400535  | 0.95327836 HNF1B        |                      |                                                                                                           |                      |                                                                                 | GOTERM_BP_FAT   | <a href="#">macromolecular complex subunit organization</a> | 18       | 1.80E-02 | 2.70E-01 |
| ILMN_2309848 | -0.6369321 | 0.949838 FXYD5          |                      |                                                                                                           |                      |                                                                                 | GOTERM_BP_FAT   | <a href="#">protein oligomerization</a>                     | 7        | 3.20E-02 | 4.00E-01 |
| ILMN_2354334 | -0.4306184 | 0.9450449 ATXN2L        |                      |                                                                                                           |                      |                                                                                 |                 |                                                             |          |          |          |
| ILMN_1768595 | -0.4287379 | 0.9405392 DLG4          |                      |                                                                                                           |                      |                                                                                 |                 |                                                             |          |          |          |
| ILMN_2358652 | -0.3726217 | 0.9391262 NXF1          |                      |                                                                                                           |                      |                                                                                 |                 |                                                             |          |          |          |

| ILMN_ID      | Correlation | Gene               | Annotation Cluster 10 | Enrichment Score: 2.15                                                             | Count | P_Value  | Benjamini |
|--------------|-------------|--------------------|-----------------------|------------------------------------------------------------------------------------|-------|----------|-----------|
| ILMN_2206746 | -0.3115692  | 0.9350952 BGN      |                       |                                                                                    |       |          |           |
| ILMN_1751161 | -0.1818679  | 0.9343799 COL7A1   | BIOCARTA              | <a href="#">Lck and Fyn tyrosine kinases in initiation of TCR Activation</a>       | 6     | 2.70E-06 | 2.60E-04  |
| ILMN_2375319 | -0.2491265  | 0.9336667 RASGRP2  | GOTERM_BP_FAT         | <a href="#">T cell selection</a>                                                   | 6     | 4.50E-06 | 1.60E-03  |
| ILMN_2176063 | -0.3155814  | 0.93324673 FCGR1C  | GOTERM_BP_FAT         | <a href="#">T cell activation</a>                                                  | 11    | 8.80E-06 | 2.50E-03  |
| ILMN_2367384 | -0.5173004  | 0.93168837 EPHB2   | GOTERM_BP_FAT         | <a href="#">cell activation</a>                                                    | 16    | 9.40E-06 | 2.30E-03  |
|              |             |                    |                       | <a href="#">Activation of Csk by cAMP-dependent Protein Kinase Inhibits</a>        |       |          |           |
| ILMN_1727271 | -0.3755743  | 0.9295296 WARS     | BIOCARTA              | <a href="#">Signaling through the T Cell Receptor</a>                              | 6     | 3.20E-05 | 1.60E-03  |
| ILMN_1770454 | -0.4362049  | 0.9271239 AGRN     | KEGG_PATHWAY          | <a href="#">Primary immunodeficiency</a>                                           | 7     | 3.40E-05 | 1.70E-03  |
| ILMN_2208903 | -0.2595646  | 0.9267303 CD52     | GOTERM_BP_FAT         | <a href="#">regulation of peptidyl-tyrosine phosphorylation</a>                    | 8     | 3.80E-05 | 7.40E-03  |
| ILMN_1685625 | -0.5453749  | 0.92595446 UCP2    | GOTERM_BP_FAT         | <a href="#">lymphocyte activation</a>                                              | 12    | 9.20E-05 | 1.40E-02  |
| ILMN_1711994 | -0.4643634  | 0.9215085 TCIRG1   | GOTERM_BP_FAT         | <a href="#">positive regulation of immune system process</a>                       | 13    | 1.10E-04 | 1.50E-02  |
| ILMN_1791057 | -0.2764992  | 0.920075 IFNAR2    | GOTERM_BP_FAT         | <a href="#">leukocyte activation</a>                                               | 13    | 1.20E-04 | 1.50E-02  |
| ILMN_2085862 | -0.5261843  | 0.9159903 SLC15A3  | BIOCARTA              | <a href="#">T Helper Cell Surface Molecules</a>                                    | 5     | 1.30E-04 | 3.10E-03  |
| ILMN_2070052 | -0.3671393  | 0.9148916 NPIPL3   | GOTERM_BP_FAT         | <a href="#">regulation of calcium-mediated signaling</a>                           | 5     | 1.40E-04 | 1.60E-02  |
| ILMN_1679880 | -0.3090046  | 0.91471004 THOC6   | GOTERM_BP_FAT         | <a href="#">positive regulation of immune response</a>                             | 10    | 1.70E-04 | 1.70E-02  |
| ILMN_3243664 | -0.4874971  | 0.91295207 NPIPL3  | GOTERM_BP_FAT         | <a href="#">hemopoietic or lymphoid organ development</a>                          | 13    | 2.40E-04 | 2.20E-02  |
| ILMN_2163723 | -0.4142269  | 0.9102357 KRT7     | GOTERM_BP_FAT         | <a href="#">T cell differentiation</a>                                             | 7     | 2.60E-04 | 2.20E-02  |
| ILMN_3243238 | -0.2350038  | 0.90686095 TPSAB1  | GOTERM_BP_FAT         | <a href="#">activation of immune response</a>                                      | 8     | 3.00E-04 | 2.50E-02  |
| ILMN_1781626 | -0.6013486  | 0.90442723 C1S     | GOTERM_CC_FAT         | <a href="#">cell surface</a>                                                       | 15    | 4.10E-04 | 1.20E-02  |
| ILMN_1700541 | -0.3621139  | 0.903176 FBLN1     | GOTERM_BP_FAT         | <a href="#">immune system development</a>                                          | 13    | 4.20E-04 | 2.90E-02  |
| ILMN_2206098 | -0.3154438  | 0.9030856 ATG10    | GOTERM_BP_FAT         | <a href="#">lymphocyte differentiation</a>                                         | 8     | 5.20E-04 | 3.20E-02  |
| ILMN_2405009 | -0.6482333  | 0.9002332 C1orf151 | GOTERM_CC_FAT         | <a href="#">T cell receptor complex</a>                                            | 4     | 5.50E-04 | 1.50E-02  |
| ILMN_1675979 | -0.2072399  | 0.8990485 RBMS3    | GOTERM_BP_FAT         | <a href="#">thymic T cell selection</a>                                            | 4     | 6.50E-04 | 3.60E-02  |
| ILMN_2143685 | -0.5237997  | 0.89562464 CLDN7   | GOTERM_CC_FAT         | <a href="#">external side of plasma membrane</a>                                   | 10    | 6.70E-04 | 1.40E-02  |
| ILMN_3237946 | -0.36541    | 0.8955296 PXDN     | BIOCARTA              | <a href="#">Bystander B Cell Activation</a>                                        | 4     | 6.80E-04 | 1.30E-02  |
|              |             |                    |                       | <a href="#">Severe combined immunodeficiency, T cell-negative, B-</a>              |       |          |           |
|              |             |                    |                       | <a href="#">cell/natural killer-cell positive</a>                                  |       |          |           |
| ILMN_2059549 | -0.3507316  | 0.89245695 SYK     | OMIM_DISEASE          | <a href="#">regulation of cellular protein metabolic process</a>                   | 3     | 7.30E-04 | 1.10E-01  |
| ILMN_1780663 | -0.20952    | 0.890468 KLHL30    | GOTERM_BP_FAT         | <a href="#">negative regulation of immune system process</a>                       | 17    | 8.00E-04 | 4.00E-02  |
| ILMN_1786823 | -0.4492833  | 0.88830346 ICAM2   | GOTERM_BP_FAT         | <a href="#">regulation of lymphocyte activation</a>                                | 7     | 9.50E-04 | 4.60E-02  |
| ILMN_1688780 | -0.2806633  | 0.8874346 S100A4   | GOTERM_BP_FAT         | <a href="#">immune response-regulating signal transduction</a>                     | 9     | 9.70E-04 | 4.60E-02  |
| ILMN_1666819 | -0.2121657  | 0.88143635 PHLDB1  | GOTERM_BP_FAT         | <a href="#">receptor complex</a>                                                   | 6     | 9.80E-04 | 4.50E-02  |
| ILMN_1711566 | -0.6160435  | 0.87931806 TIMP1   | GOTERM_CC_FAT         | <a href="#">positive regulation of calcium-mediated signaling</a>                  | 8     | 1.30E-03 | 2.30E-02  |
| ILMN_1761788 | -0.318937   | 0.8782567 MOXD1    | GOTERM_BP_FAT         | <a href="#">hemopoiesis</a>                                                        | 4     | 1.50E-03 | 6.40E-02  |
| ILMN_1815895 | -0.3069491  | 0.8761135 HLA-DRB1 | GOTERM_BP_FAT         | <a href="#">regulation of leukocyte activation</a>                                 | 11    | 1.50E-03 | 6.50E-02  |
| ILMN_1782057 | -0.3002019  | 0.8751354 ATP8B2   | GOTERM_BP_FAT         | <a href="#">positive regulation of lymphocyte activation</a>                       | 9     | 2.00E-03 | 7.70E-02  |
| ILMN_1691290 | -0.3353199  | 0.87388796 CELSR3  | GOTERM_BP_FAT         | <a href="#">leukocyte differentiation</a>                                          | 7     | 2.10E-03 | 7.90E-02  |
| ILMN_2049536 | -0.3740616  | 0.8712451 TRPV2    | GOTERM_BP_FAT         | <a href="#">regulation of protein modification process</a>                         | 8     | 2.10E-03 | 7.80E-02  |
| ILMN_1807972 | -0.2756432  | 0.8699051 MICAL1   | GOTERM_BP_FAT         | <a href="#">Antigen Dependent B Cell Activation</a>                                | 12    | 2.50E-03 | 8.80E-02  |
| ILMN_1751034 | -0.3884175  | 0.8682534 ITPRIPL2 | BIOCARTA              | <a href="#">T Cytotoxic Cell Surface Molecules</a>                                 | 4     | 2.50E-03 | 4.10E-02  |
| ILMN_1659905 | -0.4851455  | 0.86781186 FKBP10  | BIOCARTA              | <a href="#">immune response-regulating cell surface receptor signaling pathway</a> | 4     | 2.50E-03 | 4.10E-02  |
|              |             |                    |                       | <a href="#">regulation of protein amino acid phosphorylation</a>                   |       |          |           |
| ILMN_1782538 | -0.4386903  | 0.8672385 VIM      | GOTERM_BP_FAT         | <a href="#">regulation of cell activation</a>                                      | 5     | 2.50E-03 | 8.80E-02  |
| ILMN_1705783 | -0.1545213  | 0.8622637 NXF1     | GOTERM_BP_FAT         | <a href="#">positive regulation of leukocyte activation</a>                        | 9     | 2.60E-03 | 8.90E-02  |
| ILMN_3203186 | -0.2641656  | 0.8597576 AL543610 | GOTERM_BP_FAT         | <a href="#">positive thymic T cell selection</a>                                   | 9     | 2.80E-03 | 9.30E-02  |
| ILMN_1765446 | -0.342277   | 0.8553318 EMP3     | GOTERM_BP_FAT         | <a href="#">positive regulation of peptidyl-tyrosine phosphorylation</a>           | 7     | 3.30E-03 | 1.10E-01  |
| ILMN_1800354 | -0.76649    | 0.854432 CST3      | GOTERM_BP_FAT         | <a href="#">positive regulation of T cell activation</a>                           | 3     | 3.70E-03 | 1.20E-01  |
| ILMN_1703692 | -0.318653   | 0.8499179 TUBB     | GOTERM_BP_FAT         | <a href="#">positive regulation of cell activation</a>                             | 5     | 3.80E-03 | 1.20E-01  |
| ILMN_1724994 | -0.3724864  | 0.8418111 COL4A2   | GOTERM_BP_FAT         | <a href="#">Hematopoietic cell lineage</a>                                         | 7     | 4.20E-03 | 1.20E-01  |
| ILMN_2366330 | -0.2997862  | 0.83980304 FERMT3  | GOTERM_BP_FAT         | <a href="#">CTL mediated immune response against target cells</a>                  | 7     | 4.60E-03 | 7.60E-02  |
| ILMN_2169801 | -0.2454689  | 0.83863986 TPSAB1  | KEGG_PATHWAY          | <a href="#">negative thymic T cell selection</a>                                   | 7     | 4.90E-03 | 6.80E-02  |
| ILMN_2390299 | -0.5079346  | 0.8307578 PSMB8    | BIOCARTA              | <a href="#">regulation of B cell activation</a>                                    | 4     | 4.90E-03 | 6.80E-02  |
| ILMN_1799120 | -0.2293101  | 0.83003724 WFDC2   | GOTERM_BP_FAT         | <a href="#">positive regulation of alpha-beta T cell activation</a>                | 3     | 4.90E-03 | 1.40E-01  |
| ILMN_1670305 | -1.0948417  | 0.8281291 SERPING1 | GOTERM_BP_FAT         | <a href="#">immune response-activating signal transduction</a>                     | 5     | 5.10E-03 | 1.40E-01  |
| ILMN_2226955 | -0.2938926  | 0.8268525 VOPIP1   | GOTERM_BP_FAT         | <a href="#">regulation of lymphocyte proliferation</a>                             | 4     | 5.20E-03 | 1.40E-01  |
| ILMN_1778401 | -0.4915565  | 0.82583493 HLA-B   | GOTERM_BP_FAT         | <a href="#">T cell differentiation in the thymus</a>                               | 5     | 5.50E-03 | 1.50E-01  |
| ILMN_3236021 | -0.3892692  | 0.824837 ANKRD36   | GOTERM_BP_FAT         |                                                                                    | 6     | 5.60E-03 | 1.50E-01  |
| ILMN_1716563 | -0.2985041  | 0.8247995 PRKCB    | GOTERM_BP_FAT         |                                                                                    | 4     | 5.80E-03 | 1.50E-01  |

|              |            |            |           |                 |                                                                                                                                                         |    |          |          |
|--------------|------------|------------|-----------|-----------------|---------------------------------------------------------------------------------------------------------------------------------------------------------|----|----------|----------|
| ILMN_1665943 | -0.2437771 | 0.8244704  | MAP4K1    | GOTERM_BP_FAT   | <a href="#">regulation of leukocyte proliferation</a>                                                                                                   | 6  | 5.90E-03 | 1.50E-01 |
| ILMN_1779257 | -0.3663034 | 0.8213204  | CD40      | GOTERM_BP_FAT   | <a href="#">regulation of mononuclear cell proliferation</a>                                                                                            | 6  | 5.90E-03 | 1.50E-01 |
| ILMN_1684306 | -0.4423175 | 0.8178873  | S100A4    | GOTERM_BP_FAT   | <a href="#">positive T cell selection</a>                                                                                                               | 3  | 6.30E-03 | 1.50E-01 |
| ILMN_1713901 | -0.2925592 | 0.81592023 | KDELR3    | GOTERM_BP_FAT   | <a href="#">negative T cell selection</a>                                                                                                               | 3  | 6.30E-03 | 1.50E-01 |
| ILMN_1785061 | -0.2745637 | 0.8151372  | EPH82     | GOTERM_BP_FAT   | <a href="#">positive regulation of alpha-beta T cell proliferation</a>                                                                                  | 3  | 6.30E-03 | 1.50E-01 |
| ILMN_2111739 | -0.4774336 | 0.8130309  | MAN2C1    | GOTERM_BP_FAT   | <a href="#">positive regulation of lymphocyte proliferation</a>                                                                                         | 5  | 6.70E-03 | 1.60E-01 |
| ILMN_2408400 | -0.2415248 | 0.81145334 | NSUN5     | GOTERM_BP_FAT   | <a href="#">positive regulation of mononuclear cell proliferation</a>                                                                                   | 5  | 7.10E-03 | 1.60E-01 |
| ILMN_1666078 | -0.2263312 | 0.80954427 | HLA-H     | GOTERM_BP_FAT   | <a href="#">positive regulation of leukocyte proliferation</a>                                                                                          | 5  | 7.10E-03 | 1.60E-01 |
| ILMN_2058251 | -0.3064233 | 0.80710375 | VIM       | GOTERM_BP_FAT   | <a href="#">positive regulation of T cell differentiation</a>                                                                                           | 4  | 9.30E-03 | 2.00E-01 |
| ILMN_2062468 | -0.5679551 | 0.8070511  | IGFBP7    | BIOCARTA        | <a href="#">The Co-Stimulatory Signal During T-cell Activation</a>                                                                                      | 4  | 9.80E-03 | 1.10E-01 |
| ILMN_1794707 | -0.354936  | 0.80371445 | ATHL1     | GOTERM_BP_FAT   | <a href="#">positive regulation of B cell activation</a>                                                                                                | 4  | 1.00E-02 | 2.10E-01 |
| ILMN_1805750 | -0.39717   | 0.79880387 | IFITM3    | GOTERM_BP_FAT   | <a href="#">antigen receptor-mediated signaling pathway</a>                                                                                             | 4  | 1.00E-02 | 2.10E-01 |
| ILMN_1735148 | -0.3728589 | 0.79594487 | SEC24B    | GOTERM_BP_FAT   | <a href="#">regulation of humoral immune response</a>                                                                                                   | 3  | 1.10E-02 | 2.20E-01 |
| ILMN_1808777 | -0.3808807 | 0.79474026 | EHD2      | GOTERM_BP_FAT   | <a href="#">positive regulation of cell proliferation</a>                                                                                               | 13 | 1.20E-02 | 2.20E-01 |
| ILMN_1689004 | -0.4236876 | 0.7932473  | TNFRSF12A | GOTERM_BP_FAT   | <a href="#">regulation of phosphorylation</a>                                                                                                           | 14 | 1.20E-02 | 2.20E-01 |
| ILMN_1785272 | -0.4044341 | 0.79318005 | COL1A2    | GOTERM_BP_FAT   | <a href="#">positive regulation of lymphocyte differentiation</a>                                                                                       | 4  | 1.20E-02 | 2.20E-01 |
| ILMN_1789599 | -0.6776331 | 0.7889098  | C1orf151  | GOTERM_BP_FAT   | <a href="#">regulation of cytokine production</a>                                                                                                       | 8  | 1.20E-02 | 2.20E-01 |
| ILMN_2098126 | -0.33206   | 0.7836308  | CCL5      | GOTERM_BP_FAT   | <a href="#">regulation of alpha-beta T cell activation</a>                                                                                              | 4  | 1.30E-02 | 2.30E-01 |
| ILMN_1713636 | -0.3276164 | 0.7820336  | S100A6    | GOTERM_BP_FAT   | <a href="#">regulation of alpha-beta T cell proliferation</a>                                                                                           | 3  | 1.30E-02 | 2.30E-01 |
| ILMN_1720287 | -0.2498446 | 0.7791793  | E4F1      | GOTERM_MF_FAT   | <a href="#">protein kinase binding</a>                                                                                                                  | 7  | 1.40E-02 | 3.50E-01 |
| ILMN_1690125 | -0.4682108 | 0.77619785 | PDLM7     | GOTERM_BP_FAT   | <a href="#">positive regulation of protein modification process</a>                                                                                     | 8  | 1.40E-02 | 2.50E-01 |
| ILMN_1747195 | -0.5296944 | 0.77611643 | PSMB8     | GOTERM_BP_FAT   | <a href="#">positive regulation of cellular protein metabolic process</a>                                                                               | 9  | 1.50E-02 | 2.50E-01 |
| ILMN_1712545 | -0.3020494 | 0.7758006  | S100A3    | GOTERM_BP_FAT   | <a href="#">regulation of phosphorus metabolic process</a>                                                                                              | 14 | 1.60E-02 | 2.60E-01 |
| ILMN_1730777 | -0.3567672 | 0.77183926 | KRT19     | GOTERM_BP_FAT   | <a href="#">regulation of phosphate metabolic process</a>                                                                                               | 14 | 1.60E-02 | 2.60E-01 |
|              |            |            |           |                 | <a href="#">immune response-activating cell surface receptor signaling pathway</a>                                                                      | 4  | 1.60E-02 | 2.60E-01 |
| ILMN_1671295 | -0.2948444 | 0.77169406 | MST151    | GOTERM_BP_FAT   | <a href="#">acid</a>                                                                                                                                    | 3  | 1.70E-02 | 1.60E-01 |
| ILMN_1653220 | -0.2644714 | 0.7711403  | PITPNM1   | SP_PIR_KEYWORDS | <a href="#">regulation of MAPKKK cascade</a>                                                                                                            | 6  | 1.70E-02 | 2.70E-01 |
| ILMN_1705750 | -0.4122929 | 0.7699518  | TGM2      | GOTERM_BP_FAT   | <a href="#">Antigen processing and presentation</a>                                                                                                     | 6  | 1.70E-02 | 1.10E-01 |
| ILMN_3248247 | -0.3075986 | 0.76758534 | LOC349114 | KEGG_PATHWAY    | <a href="#">HIV Induced T Cell Apoptosis</a>                                                                                                            | 3  | 1.90E-02 | 1.70E-01 |
| ILMN_1654246 | -0.6002158 | 0.7673532  | SIRT6     | BIOCARTA        | <a href="#">positive regulation of protein metabolic process</a>                                                                                        | 9  | 1.90E-02 | 2.80E-01 |
| ILMN_1815500 | -0.3069432 | 0.7641663  | ITPR3     | GOTERM_BP_FAT   | <a href="#">protein amino acid phosphorylation</a>                                                                                                      | 17 | 2.10E-02 | 3.10E-01 |
| ILMN_1787109 | -0.5007137 | 0.76132065 | CLK2      | GOTERM_BP_FAT   | <a href="#">regulation of T cell activation</a>                                                                                                         | 6  | 2.20E-02 | 3.20E-01 |
| ILMN_1719449 | -0.3440301 | 0.754508   | DCLK2     | GOTERM_BP_FAT   | <a href="#">IL 5 Signaling Pathway</a>                                                                                                                  | 3  | 2.30E-02 | 1.90E-01 |
| ILMN_1815057 | -0.3384102 | 0.75351226 | PDGFRB    | BIOCARTA        | <a href="#">activation of MAPK activity</a>                                                                                                             | 5  | 2.60E-02 | 3.50E-01 |
| ILMN_2155719 | -0.5270782 | 0.7532077  | NBPFL     | GOTERM_BP_FAT   | <a href="#">positive regulation of cytokine biosynthetic process</a>                                                                                    | 4  | 2.80E-02 | 3.60E-01 |
| ILMN_1777342 | -0.2784544 | 0.75301546 | PREX1     | GOTERM_BP_FAT   | <a href="#">positive regulation of B cell proliferation</a>                                                                                             | 3  | 3.00E-02 | 3.80E-01 |
| ILMN_1811702 | -0.4603844 | 0.7490145  | GRN       | GOTERM_BP_FAT   | <a href="#">protein kinase cascade</a>                                                                                                                  | 11 | 3.10E-02 | 3.90E-01 |
| ILMN_1705602 | -0.4110136 | 0.7484236  | KLHL17    | GOTERM_BP_FAT   | <a href="#">kinase binding</a>                                                                                                                          | 7  | 3.20E-02 | 4.80E-01 |
| ILMN_1651767 | -0.3164083 | 0.7468634  | MKL1      | GOTERM_MF_FAT   | <a href="#">regulation of T cell differentiation</a>                                                                                                    | 4  | 3.20E-02 | 4.00E-01 |
| ILMN_1895548 | -0.2717167 | 0.7460645  | AKO21726  | GOTERM_BP_FAT   | <a href="#">positive regulation of protein amino acid phosphorylation</a>                                                                               | 5  | 3.40E-02 | 4.10E-01 |
| ILMN_1780806 | -0.3624143 | 0.7455973  | ANKRD36B  | GOTERM_BP_FAT   | <a href="#">positive regulation of protein kinase activity</a>                                                                                          | 8  | 3.40E-02 | 4.00E-01 |
| ILMN_3228688 | -0.582792  | 0.74362123 | HLA-DRB1  | GOTERM_BP_FAT   | <a href="#">cell proliferation</a>                                                                                                                      | 12 | 3.70E-02 | 4.30E-01 |
| ILMN_1738675 | -0.2855184 | 0.7427395  | PTPN6     | GOTERM_BP_FAT   | <a href="#">regulation of adaptive immune response based on somatic recombination of immune receptors built from immunoglobulin superfamily domains</a> | 4  | 3.90E-02 | 4.40E-01 |
| ILMN_2090105 | -0.9173182 | 0.7417683  | TAGLN2    | GOTERM_BP_FAT   | <a href="#">positive regulation of kinase activity</a>                                                                                                  | 8  | 4.00E-02 | 4.40E-01 |
| ILMN_1752526 | -0.308724  | 0.73536175 | RNF144B   | GOTERM_BP_FAT   | <a href="#">MAPKKK cascade</a>                                                                                                                          | 7  | 4.10E-02 | 4.50E-01 |
| ILMN_2101885 | -0.3070515 | 0.73364246 | TUBB      | GOTERM_BP_FAT   | <a href="#">regulation of adaptive immune response</a>                                                                                                  | 4  | 4.10E-02 | 4.40E-01 |
| ILMN_1675709 | -0.2769983 | 0.7305087  | ARFGAP1   | GOTERM_BP_FAT   | <a href="#">regulation of B cell mediated immunity</a>                                                                                                  | 3  | 4.20E-02 | 4.50E-01 |
| ILMN_1803988 | -0.3516586 | 0.72845715 | MCL1      | GOTERM_BP_FAT   | <a href="#">regulation of immunoglobulin mediated immune response</a>                                                                                   | 3  | 4.20E-02 | 4.50E-01 |
| ILMN_1708025 | -0.3238424 | 0.7281853  | RBPMS     | GOTERM_BP_FAT   | <a href="#">positive regulation of phosphorylation</a>                                                                                                  | 5  | 4.40E-02 | 4.60E-01 |
| ILMN_3246005 | -0.3095196 | 0.72722805 | KDM5B     | GOTERM_BP_FAT   | <a href="#">positive regulation of transferase activity</a>                                                                                             | 8  | 4.70E-02 | 4.70E-01 |
| ILMN_1691717 | -0.3052667 | 0.72658294 | RHBDF2    | GOTERM_BP_FAT   | <a href="#">T cell receptor signaling pathway</a>                                                                                                       | 6  | 4.70E-02 | 2.10E-01 |
| ILMN_1807493 | -0.4520136 | 0.7222337  | ACVRL1    | KEGG_PATHWAY    | <a href="#">positive regulation of phosphate metabolic process</a>                                                                                      | 5  | 4.80E-02 | 4.80E-01 |
| ILMN_1727043 | -0.2914142 | 0.721914   | GLT25D1   | GOTERM_BP_FAT   | <a href="#">positive regulation of phosphorus metabolic process</a>                                                                                     | 5  | 4.80E-02 | 4.80E-01 |
| ILMN_1814917 | -0.3462726 | 0.72037286 | TLE2      | GOTERM_BP_FAT   | <a href="#">IL 17 Signaling Pathway</a>                                                                                                                 | 3  | 5.00E-02 | 3.40E-01 |
| ILMN_1652631 | -0.5696183 | 0.71945685 | GLIPR2    | BIOCARTA        |                                                                                                                                                         |    |          |          |

|              |            |            |               |                       |                                                                                                                                                                  |       |          |           |
|--------------|------------|------------|---------------|-----------------------|------------------------------------------------------------------------------------------------------------------------------------------------------------------|-------|----------|-----------|
| ILMN_1689655 | -0.352833  | 0.7193123  | HLA-DRA       | GOTERM_BP_FAT         | <a href="#">regulation of immune effector process</a>                                                                                                            | 5     | 5.00E-02 | 4.80E-01  |
| ILMN_2157441 | -0.3784043 | 0.7175189  | HLA-DRA       | GOTERM_BP_FAT         | <a href="#">regulation of leukocyte mediated immunity</a>                                                                                                        | 4     | 5.10E-02 | 4.90E-01  |
| ILMN_3229210 | -0.3558461 | 0.71513367 | FLJ45340      | GOTERM_BP_FAT         | <a href="#">positive regulation of MAP kinase activity</a>                                                                                                       | 5     | 5.10E-02 | 4.90E-01  |
| ILMN_1779010 | -0.3212784 | 0.71320313 | MAP3K3        | GOTERM_BP_FAT         | <a href="#">negative regulation of cell communication</a>                                                                                                        | 8     | 5.40E-02 | 5.00E-01  |
| ILMN_1765021 | -0.4371012 | 0.7113927  | TOP3B         | GOTERM_BP_FAT         | <a href="#">regulation of lymphocyte differentiation</a>                                                                                                         | 4     | 5.50E-02 | 5.00E-01  |
| ILMN_2380237 | -0.3958364 | 0.71032566 | C1QTNF1       | GOTERM_BP_FAT         | <a href="#">regulation of B cell proliferation</a>                                                                                                               | 3     | 5.60E-02 | 5.00E-01  |
|              |            |            |               |                       | <a href="#">positive regulation of adaptive immune response based on somatic recombination of immune receptors built from immunoglobulin superfamily domains</a> | 3     | 6.30E-02 | 5.40E-01  |
| ILMN_2278729 | -0.3459377 | 0.7091275  | EIF3B         | GOTERM_BP_FAT         | <a href="#">positive regulation of adaptive immune response</a>                                                                                                  | 3     | 6.70E-02 | 5.50E-01  |
| ILMN_2375992 | -0.344336  | 0.7083419  | SPINT1        | GOTERM_BP_FAT         | <a href="#">regulation of cytokine biosynthetic process</a>                                                                                                      | 4     | 8.10E-02 | 6.10E-01  |
| ILMN_3230608 | -0.4429316 | 0.7077526  | NBPF14        | GOTERM_BP_FAT         | <a href="#">negative regulation of signal transduction</a>                                                                                                       | 7     | 8.30E-02 | 6.10E-01  |
| ILMN_2371911 | -0.9583868 | 0.7015006  | MUC1          | GOTERM_BP_FAT         | <a href="#">B cell activation</a>                                                                                                                                | 4     | 8.60E-02 | 6.20E-01  |
| ILMN_1736567 | -0.5390354 | 0.7010446  | CD74          | GOTERM_BP_FAT         | <a href="#">enzyme binding</a>                                                                                                                                   | 12    | 8.80E-02 | 7.10E-01  |
| ILMN_1668748 | -0.3158949 | 0.70089024 | MED15         | GOTERM_MF_FAT         | <a href="#">positive regulation of T cell proliferation</a>                                                                                                      | 3     | 9.90E-02 | 6.50E-01  |
| ILMN_1811117 | -0.3808893 | 0.69952255 | DKFZp667P0924 | GOTERM_BP_FAT         | <a href="#">positive regulation of catalytic activity</a>                                                                                                        | 12    | 1.00E-01 | 6.50E-01  |
| ILMN_1703593 | -0.394547  | 0.6987069  | BAIAP2L1      | GOTERM_BP_FAT         | <a href="#">regulation of protein kinase activity</a>                                                                                                            | 9     | 1.00E-01 | 6.50E-01  |
| ILMN_1778111 | -0.3320264 | 0.69664574 | FLJ45340      | GOTERM_BP_FAT         | <a href="#">positive regulation of molecular function</a>                                                                                                        | 13    | 1.10E-01 | 6.70E-01  |
| ILMN_2366634 | -0.3590136 | 0.69484407 | PKM2          | GOTERM_BP_FAT         | <a href="#">regulation of production of molecular mediator of immune response</a>                                                                                | 3     | 1.10E-01 | 6.70E-01  |
| ILMN_2407434 | -0.3631673 | 0.6850699  | DCLK2         | GOTERM_BP_FAT         | <a href="#">regulation of kinase activity</a>                                                                                                                    | 9     | 1.20E-01 | 6.80E-01  |
| ILMN_2382431 | -0.8878012 | 0.6826305  | ANKRD36       | GOTERM_BP_FAT         | <a href="#">positive regulation of immune effector process</a>                                                                                                   | 3     | 1.20E-01 | 6.90E-01  |
| ILMN_1699931 | -0.4965842 | 0.6793603  | HCST          | GOTERM_BP_FAT         | <a href="#">regulation of MAP kinase activity</a>                                                                                                                | 5     | 1.30E-01 | 7.00E-01  |
| ILMN_2383489 | -0.3749546 | 0.6792119  | CDK5RAP3      | GOTERM_BP_FAT         | <a href="#">Cytokines and Inflammatory Response</a>                                                                                                              | 3     | 1.30E-01 | 6.30E-01  |
| ILMN_1752592 | -0.3833149 | 0.6780105  | HLA-DRB4      | BIOCARTA              | <a href="#">regulation of transferase activity</a>                                                                                                               | 9     | 1.40E-01 | 7.20E-01  |
| ILMN_2379644 | -0.5249819 | 0.67535543 | CD74          | GOTERM_BP_FAT         | <a href="#">negative regulation of response to stimulus</a>                                                                                                      | 4     | 1.60E-01 | 7.50E-01  |
| ILMN_1701643 | -0.3674708 | 0.6733213  | GDPD5         | GOTERM_BP_FAT         | <a href="#">regulation of lymphocyte mediated immunity</a>                                                                                                       | 3     | 1.70E-01 | 7.70E-01  |
| ILMN_1656920 | -0.499193  | 0.67319584 | CRIP1         | GOTERM_BP_FAT         | <a href="#">alternative initiation</a>                                                                                                                           | 3     | 1.70E-01 | 6.20E-01  |
| ILMN_1737157 | -0.6897214 | 0.6702828  | GRAMD1A       | SP_PIR_KEYWORDS       | <a href="#">regulation of T cell proliferation</a>                                                                                                               | 3     | 2.10E-01 | 8.20E-01  |
| ILMN_1739794 | -0.4857385 | 0.666808   | CD3E          | GOTERM_BP_FAT         | <a href="#">regulation of secretion</a>                                                                                                                          | 4     | 5.20E-01 | 9.80E-01  |
| ILMN_1758315 | -0.4451488 | 0.6659471  | SLC9A9        | GOTERM_BP_FAT         | <a href="#">regulation of cellular localization</a>                                                                                                              | 3     | 8.60E-01 | 1.00E+00  |
| ILMN_2175912 | -0.4234652 | 0.6652375  | ITGB2         | GOTERM_BP_FAT         |                                                                                                                                                                  |       |          |           |
| ILMN_1683026 | -0.388655  | 0.66396236 | PSMB10        | Annotation Cluster 11 | Enrichment Score: 1.9                                                                                                                                            | Count | P_Value  | Benjamini |
| ILMN_1753584 | -0.5324534 | 0.66179246 | KRT8          | GOTERM_BP_FAT         | <a href="#">response to virus</a>                                                                                                                                | 8     | 7.40E-04 | 3.80E-02  |
| ILMN_1727402 | -0.5068444 | 0.6616992  | HCLS1         | KEGG_PATHWAY          | <a href="#">Toll-like receptor signaling pathway</a>                                                                                                             | 7     | 1.00E-02 | 8.90E-02  |
| ILMN_2147133 | -0.4381964 | 0.65923274 | NBPF1         | KEGG_PATHWAY          | <a href="#">Cytosolic DNA-sensing pathway</a>                                                                                                                    | 3     | 2.70E-01 | 6.80E-01  |
| ILMN_1676256 | -0.3549909 | 0.658206   | TPSAB1        | Annotation Cluster 12 | Enrichment Score: 1.87                                                                                                                                           | Count | P_Value  | Benjamini |
| ILMN_1737205 | -0.4199736 | 0.65487623 | MCM4          | GOTERM_BP_FAT         | <a href="#">programmed cell death</a>                                                                                                                            | 19    | 1.80E-03 | 7.10E-02  |
| ILMN_1790637 | -0.375038  | 0.65421516 | C11orf80      | GOTERM_BP_FAT         | <a href="#">apoptosis</a>                                                                                                                                        | 17    | 8.50E-03 | 1.90E-01  |
| ILMN_2161746 | -0.4203926 | 0.6510027  | TRIP10        | GOTERM_BP_FAT         | <a href="#">cell death</a>                                                                                                                                       | 19    | 9.70E-03 | 2.00E-01  |
| ILMN_2410783 | -0.6115214 | 0.6435011  | GAA           | GOTERM_BP_FAT         | <a href="#">death</a>                                                                                                                                            | 19    | 1.00E-02 | 2.10E-01  |
| ILMN_2064606 | -0.4619445 | 0.64152145 | TBC1D2B       | SP_PIR_KEYWORDS       | <a href="#">Apoptosis</a>                                                                                                                                        | 7     | 2.90E-01 | 7.40E-01  |
| ILMN_1674874 | -0.3659361 | 0.64023876 | MFSD10        | Annotation Cluster 13 | Enrichment Score: 1.71                                                                                                                                           | Count | P_Value  | Benjamini |
| ILMN_1761138 | -0.4229533 | 0.6345543  | C9orf142      | SP_PIR_KEYWORDS       | <a href="#">collagen</a>                                                                                                                                         | 7     | 8.80E-04 | 1.70E-02  |
| ILMN_1742330 | -0.5733025 | 0.631179   | PLXNB1        | INTERPRO              | <a href="#">Collagen triple helix repeat</a>                                                                                                                     | 6     | 4.20E-03 | 3.10E-01  |
| ILMN_1754842 | -1.1469843 | 0.6292545  | DLGAP4        | SP_PIR_KEYWORDS       | <a href="#">hydroxyproline</a>                                                                                                                                   | 4     | 9.20E-03 | 1.20E-01  |
| ILMN_2395375 | -0.43235   | 0.62881    | GABBR1        | SP_PIR_KEYWORDS       | <a href="#">hydroxylation</a>                                                                                                                                    | 5     | 9.60E-03 | 1.20E-01  |
| ILMN_3200362 | -0.5219584 | 0.6270053  | NBPF1         | GOTERM_BP_FAT         | <a href="#">extracellular structure organization</a>                                                                                                             | 7     | 2.50E-02 | 3.40E-01  |
| ILMN_1761912 | -0.5853727 | 0.61685646 | MGAT1         | GOTERM_CC_FAT         | <a href="#">extracellular matrix part</a>                                                                                                                        | 6     | 2.50E-02 | 2.80E-01  |
| ILMN_2398847 | -0.4906956 | 0.6160503  | ARHGAP17      | SP_PIR_KEYWORDS       | <a href="#">hydroxylysine</a>                                                                                                                                    | 3     | 5.10E-02 | 3.30E-01  |
| ILMN_1773885 | -0.9395435 | 0.61211187 | DMAP1         | SP_PIR_KEYWORDS       | <a href="#">triple helix</a>                                                                                                                                     | 3     | 5.10E-02 | 3.30E-01  |
| ILMN_2066066 | -0.4463386 | 0.6036648  | HLA-DRB6      | GOTERM_BP_FAT         | <a href="#">extracellular matrix organization</a>                                                                                                                | 5     | 5.40E-02 | 4.90E-01  |
| ILMN_1683576 | -0.4752797 | 0.6011738  | MAGED2        | UP_SEQ_FEATURE        | domain:Collagen-like                                                                                                                                             | 3     | 6.70E-02 | 9.10E-01  |
| ILMN_2349658 | -0.976337  | 0.5986835  | TSPO          | GOTERM_CC_FAT         | <a href="#">collagen</a>                                                                                                                                         | 3     | 8.70E-02 | 6.00E-01  |
| ILMN_1778360 | -0.5825829 | 0.594741   | PYGB          | Annotation Cluster 14 | Enrichment Score: 1.68                                                                                                                                           | Count | P_Value  | Benjamini |
| ILMN_1653828 | -0.452502  | 0.5902511  | CHFR          | GOTERM_BP_FAT         | <a href="#">regulation of protein kinase cascade</a>                                                                                                             | 13    | 1.60E-04 | 1.80E-02  |
| ILMN_2410909 | -0.4180519 | 0.585066   | AKT1          | GOTERM_BP_FAT         | <a href="#">regulation of JNK cascade</a>                                                                                                                        | 5     | 1.20E-02 | 2.20E-01  |
| ILMN_2114422 | -0.4646005 | 0.5784965  | NOD1          | GOTERM_BP_FAT         | <a href="#">regulation of stress-activated protein kinase signaling pathway</a>                                                                                  | 5     | 1.50E-02 | 2.50E-01  |

|              |            |            |               |
|--------------|------------|------------|---------------|
| ILMN_1786197 | -0.4536233 | 0.56482023 | NR2F1         |
| ILMN_1752340 | -0.6061316 | 0.56157315 | ARF5          |
| ILMN_1761068 | -0.5335256 | 0.56072944 | DKFZp434K1323 |
| ILMN_1728049 | -0.517863  | 0.51490104 | S100A16       |
| ILMN_1772888 | -0.6104952 | 0.44741943 | AX746718      |
| ILMN_3281563 | -0.7814937 | 0.377732   | RPL12         |

| Annotation Cluster    | Enrichment Score                                              | Count                 | P_Value                                                                         | Benjamini      |                                          |          |          |          |
|-----------------------|---------------------------------------------------------------|-----------------------|---------------------------------------------------------------------------------|----------------|------------------------------------------|----------|----------|----------|
| Annotation Cluster 15 | Enrichment Score: 1.56                                        | GOTERM_BP_FAT         | <a href="#">regulation of MAPKKK cascade</a>                                    | 6              | 1.70E-02                                 | 2.70E-01 |          |          |
|                       |                                                               | GOTERM_BP_FAT         | <a href="#">regulation of cellular response to stress</a>                       | 5              | 5.30E-02                                 | 4.90E-01 |          |          |
|                       |                                                               | GOTERM_BP_FAT         | <a href="#">positive regulation of molecular function</a>                       | 13             | 1.10E-01                                 | 6.70E-01 |          |          |
|                       |                                                               | GOTERM_BP_FAT         | <a href="#">positive regulation of transport</a>                                | 4              | 5.90E-01                                 | 9.90E-01 |          |          |
|                       |                                                               | SP_PIR_KEYWORDS       | <a href="#">protease inhibitor</a>                                              | 6              | 8.50E-03                                 | 1.10E-01 |          |          |
|                       |                                                               | GOTERM_MF_FAT         | <a href="#">endopeptidase inhibitor activity</a>                                | 7              | 1.30E-02                                 | 3.60E-01 |          |          |
|                       |                                                               | SP_PIR_KEYWORDS       | <a href="#">Serine protease inhibitor</a>                                       | 5              | 1.40E-02                                 | 1.50E-01 |          |          |
|                       |                                                               | GOTERM_MF_FAT         | <a href="#">peptidase inhibitor activity</a>                                    | 7              | 1.60E-02                                 | 3.60E-01 |          |          |
|                       |                                                               | GOTERM_MF_FAT         | <a href="#">serine-type endopeptidase inhibitor activity</a>                    | 5              | 3.40E-02                                 | 4.80E-01 |          |          |
|                       |                                                               | UP_SEQ_FEATURE        | site:Reactive bond                                                              | 3              | 9.80E-02                                 | 9.30E-01 |          |          |
| GOTERM_MF_FAT         | <a href="#">enzyme inhibitor activity</a>                     | 7                     | 1.50E-01                                                                        | 7.50E-01       |                                          |          |          |          |
| Annotation Cluster 16 | Enrichment Score: 1.54                                        | SP_PIR_KEYWORDS       | <a href="#">zymogen</a>                                                         | 10             | 7.40E-04                                 | 1.60E-02 |          |          |
|                       |                                                               | UP_SEQ_FEATURE        | propeptide:Activation peptide                                                   | 6              | 1.70E-03                                 | 1.90E-01 |          |          |
|                       |                                                               | UP_SEQ_FEATURE        | domain:Peptidase S1                                                             | 6              | 8.40E-03                                 | 5.30E-01 |          |          |
|                       |                                                               | INTERPRO              | <a href="#">Peptidase S1A_chymotrypsin</a>                                      | 6              | 1.00E-02                                 | 4.50E-01 |          |          |
|                       |                                                               | INTERPRO              | <a href="#">Peptidase S1/S6_chymotrypsin/Hap_active site</a>                    | 6              | 1.10E-02                                 | 4.30E-01 |          |          |
|                       |                                                               | INTERPRO              | <a href="#">Peptidase S1 and S6_chymotrypsin/Hap</a>                            | 6              | 1.60E-02                                 | 4.50E-01 |          |          |
|                       |                                                               | PIR_SUPERFAMILY       | PIRSF001135:trypsin                                                             | 4              | 1.90E-02                                 | 7.10E-01 |          |          |
|                       |                                                               | SP_PIR_KEYWORDS       | <a href="#">Serine protease</a>                                                 | 6              | 2.20E-02                                 | 2.00E-01 |          |          |
|                       |                                                               | SP_PIR_KEYWORDS       | <a href="#">serine proteinase</a>                                               | 4              | 2.50E-02                                 | 2.20E-01 |          |          |
|                       |                                                               | GOTERM_MF_FAT         | <a href="#">endopeptidase activity</a>                                          | 11             | 2.80E-02                                 | 4.50E-01 |          |          |
|                       |                                                               | SP_PIR_KEYWORDS       | <a href="#">Protease</a>                                                        | 12             | 2.80E-02                                 | 2.30E-01 |          |          |
|                       |                                                               | SMART                 | <a href="#">Tryp_SPc</a>                                                        | 6              | 4.00E-02                                 | 8.50E-01 |          |          |
|                       |                                                               | GOTERM_MF_FAT         | <a href="#">serine-type endopeptidase activity</a>                              | 6              | 5.40E-02                                 | 6.00E-01 |          |          |
|                       |                                                               | GOTERM_MF_FAT         | <a href="#">peptidase activity</a>                                              | 13             | 7.90E-02                                 | 7.20E-01 |          |          |
|                       |                                                               | UP_SEQ_FEATURE        | active site:Charge relay system                                                 | 6              | 8.30E-02                                 | 9.30E-01 |          |          |
|                       |                                                               | GOTERM_MF_FAT         | <a href="#">serine-type peptidase activity</a>                                  | 6              | 8.80E-02                                 | 7.00E-01 |          |          |
|                       |                                                               | GOTERM_MF_FAT         | <a href="#">serine hydrolase activity</a>                                       | 6              | 9.10E-02                                 | 6.90E-01 |          |          |
|                       |                                                               | GOTERM_MF_FAT         | <a href="#">peptidase activity, acting on L-amino acid peptides</a>             | 12             | 1.10E-01                                 | 7.20E-01 |          |          |
|                       |                                                               | GOTERM_BP_FAT         | <a href="#">proteolysis</a>                                                     | 18             | 2.70E-01                                 | 8.80E-01 |          |          |
|                       |                                                               | SP_PIR_KEYWORDS       | <a href="#">hydrolase</a>                                                       | 22             | 2.80E-01                                 | 7.40E-01 |          |          |
|                       |                                                               | Annotation Cluster 17 | Enrichment Score: 1.51                                                          | UP_SEQ_FEATURE | region of interest:Coil 2                | 5        | 6.80E-03 | 4.90E-01 |
|                       |                                                               |                       |                                                                                 | UP_SEQ_FEATURE | region of interest:Linker 12             | 5        | 6.80E-03 | 4.90E-01 |
| UP_SEQ_FEATURE        | region of interest:Coil 1B                                    |                       |                                                                                 | 5              | 9.40E-03                                 | 5.30E-01 |          |          |
| UP_SEQ_FEATURE        | region of interest:Linker 1                                   |                       |                                                                                 | 5              | 9.40E-03                                 | 5.30E-01 |          |          |
| UP_SEQ_FEATURE        | region of interest:Coil 1A                                    |                       |                                                                                 | 5              | 9.40E-03                                 | 5.30E-01 |          |          |
| UP_SEQ_FEATURE        | region of interest:Rod                                        |                       |                                                                                 | 5              | 9.80E-03                                 | 5.20E-01 |          |          |
| UP_SEQ_FEATURE        | region of interest:Head                                       |                       |                                                                                 | 5              | 1.10E-02                                 | 5.30E-01 |          |          |
| INTERPRO              | <a href="#">Filament</a>                                      |                       |                                                                                 | 5              | 1.30E-02                                 | 4.30E-01 |          |          |
| INTERPRO              | <a href="#">Intermediate filament protein, conserved site</a> |                       |                                                                                 | 5              | 1.30E-02                                 | 4.30E-01 |          |          |
| SP_PIR_KEYWORDS       | <a href="#">Intermediate filament</a>                         |                       |                                                                                 | 5              | 1.30E-02                                 | 1.40E-01 |          |          |
| INTERPRO              | <a href="#">Intermediate filament protein</a>                 |                       |                                                                                 | 5              | 1.40E-02                                 | 4.20E-01 |          |          |
| PIR_SUPERFAMILY       | PIRSF002282:cytoskeletal keratin                              |                       |                                                                                 | 5              | 1.60E-02                                 | 8.70E-01 |          |          |
| INTERPRO              | <a href="#">Type II keratin</a>                               |                       |                                                                                 | 3              | 4.80E-02                                 | 7.10E-01 |          |          |
| UP_SEQ_FEATURE        | site:Stutter                                                  |                       |                                                                                 | 3              | 5.70E-02                                 | 8.90E-01 |          |          |
| UP_SEQ_FEATURE        | region of interest:Tail                                       |                       |                                                                                 | 4              | 5.90E-02                                 | 8.90E-01 |          |          |
| GOTERM_BP_FAT         | <a href="#">cytoskeleton organization</a>                     |                       |                                                                                 | 11             | 7.70E-02                                 | 6.00E-01 |          |          |
| GOTERM_CC_FAT         | <a href="#">intermediate filament</a>                         |                       |                                                                                 | 6              | 1.20E-01                                 | 6.90E-01 |          |          |
| GOTERM_CC_FAT         | <a href="#">intermediate filament cytoskeleton</a>            |                       |                                                                                 | 6              | 1.20E-01                                 | 7.00E-01 |          |          |
| SP_PIR_KEYWORDS       | <a href="#">keratin</a>                                       |                       |                                                                                 | 4              | 2.40E-01                                 | 7.00E-01 |          |          |
| GOTERM_CC_FAT         | <a href="#">keratin filament</a>                              |                       |                                                                                 | 3              | 3.50E-01                                 | 9.20E-01 |          |          |
| GOTERM_CC_FAT         | <a href="#">cytoskeletal part</a>                             |                       |                                                                                 | 14             | 5.90E-01                                 | 9.60E-01 |          |          |
| Annotation Cluster 18 | Enrichment Score: 1.46                                        |                       |                                                                                 | INTERPRO       | <a href="#">Immunoglobulin-like fold</a> | 20       | 7.70E-05 | 3.90E-02 |
|                       |                                                               | INTERPRO              | <a href="#">Immunoglobulin/major histocompatibility complex, conserved site</a> | 7              | 8.10E-04                                 | 1.90E-01 |          |          |
|                       |                                                               | INTERPRO              | <a href="#">Immunoglobulin-like</a>                                             | 16             | 1.70E-03                                 | 2.00E-01 |          |          |
|                       |                                                               |                       |                                                                                 |                |                                          |          |          |          |



|                              |                               |                                                                       |              |                |                  |
|------------------------------|-------------------------------|-----------------------------------------------------------------------|--------------|----------------|------------------|
|                              | SP_PIR_KEYWORDS               | <a href="#">Immunoglobulin domain</a>                                 | 13           | 9.60E-03       | 1.10E-01         |
|                              | INTERPRO                      | <a href="#">Immunoglobulin subtype</a>                                | 9            | 5.80E-02       | 7.30E-01         |
|                              | UP_SEQ_FEATURE                | domain:Ig-like C2-type 1                                              | 6            | 7.40E-02       | 9.20E-01         |
|                              | UP_SEQ_FEATURE                | domain:Ig-like C2-type 2                                              | 6            | 7.60E-02       | 9.20E-01         |
|                              | SMART                         | <a href="#">IG</a>                                                    | 9            | 1.70E-01       | 9.60E-01         |
|                              | UP_SEQ_FEATURE                | domain:Ig-like C2-type 3                                              | 4            | 1.70E-01       | 9.80E-01         |
|                              | UP_SEQ_FEATURE                | domain:Ig-like V-type                                                 | 4            | 1.80E-01       | 9.80E-01         |
|                              | INTERPRO                      | <a href="#">Immunoglobulin subtype 2</a>                              | 5            | 2.60E-01       | 9.60E-01         |
|                              | SMART                         | <a href="#">IGc2</a>                                                  | 5            | 4.30E-01       | 9.90E-01         |
|                              | INTERPRO                      | <a href="#">Immunoglobulin</a>                                        | 4            | 4.70E-01       | 1.00E+00         |
| <b>Annotation Cluster 19</b> | <b>Enrichment Score: 1.46</b> |                                                                       | <b>Count</b> | <b>P_Value</b> | <b>Benjamini</b> |
|                              | GOTERM_BP_FAT                 | <a href="#">in utero embryonic development</a>                        | 8            | 1.10E-02       | 2.10E-01         |
|                              | GOTERM_BP_FAT                 | <a href="#">blastocyst development</a>                                | 4            | 2.10E-02       | 3.00E-01         |
|                              | GOTERM_BP_FAT                 | <a href="#">blastocyst formation</a>                                  | 3            | 3.00E-02       | 3.80E-01         |
|                              | GOTERM_BP_FAT                 | <a href="#">chordate embryonic development</a>                        | 9            | 8.60E-02       | 6.20E-01         |
|                              | GOTERM_BP_FAT                 | <a href="#">embryonic development ending in birth or egg hatching</a> | 9            | 8.80E-02       | 6.20E-01         |
| <b>Annotation Cluster 20</b> | <b>Enrichment Score: 1.44</b> |                                                                       | <b>Count</b> | <b>P_Value</b> | <b>Benjamini</b> |
|                              | GOTERM_CC_FAT                 | <a href="#">lysosome</a>                                              | 8            | 3.00E-02       | 3.00E-01         |
|                              | GOTERM_CC_FAT                 | <a href="#">lytic vacuole</a>                                         | 8            | 3.00E-02       | 3.00E-01         |
|                              | SP_PIR_KEYWORDS               | <a href="#">lysosome</a>                                              | 6            | 3.10E-02       | 2.40E-01         |
|                              | GOTERM_CC_FAT                 | <a href="#">vacuole</a>                                               | 8            | 6.60E-02       | 5.20E-01         |
| <b>Annotation Cluster 21</b> | <b>Enrichment Score: 1.33</b> |                                                                       | <b>Count</b> | <b>P_Value</b> | <b>Benjamini</b> |
|                              | SP_PIR_KEYWORDS               | <a href="#">calcium binding</a>                                       | 7            | 1.30E-03       | 2.30E-02         |
|                              | INTERPRO                      | <a href="#">S100/CaBP-9k-type, calcium binding, subdomain</a>         | 4            | 4.60E-03       | 2.90E-01         |
|                              | INTERPRO                      | <a href="#">S100/CaBP-9k-type, calcium binding</a>                    | 4            | 5.10E-03       | 2.90E-01         |
|                              | UP_SEQ_FEATURE                | calcium-binding region:1; low affinity                                | 3            | 1.90E-02       | 6.60E-01         |
|                              | INTERPRO                      | <a href="#">EF-HAND 1</a>                                             | 8            | 2.00E-02       | 5.10E-01         |
|                              | UP_SEQ_FEATURE                | domain:EF-hand 1                                                      | 7            | 2.10E-02       | 6.80E-01         |
|                              | UP_SEQ_FEATURE                | domain:EF-hand 2                                                      | 7            | 2.10E-02       | 6.80E-01         |
|                              | UP_SEQ_FEATURE                | calcium-binding region:2; high affinity                               | 3            | 2.50E-02       | 7.10E-01         |
|                              | SP_PIR_KEYWORDS               | <a href="#">EF hand</a>                                               | 4            | 3.30E-02       | 2.40E-01         |
|                              | PIRS_SUPERFAMILY              | PIRSF002353:S-100 protein                                             | 3            | 3.60E-02       | 7.90E-01         |
|                              | INTERPRO                      | <a href="#">EF-HAND 2</a>                                             | 7            | 5.50E-02       | 7.30E-01         |
|                              | INTERPRO                      | <a href="#">EF-Hand type</a>                                          | 7            | 7.90E-02       | 7.60E-01         |
|                              | UP_SEQ_FEATURE                | calcium-binding region:2                                              | 3            | 3.90E-01       | 1.00E+00         |
|                              | UP_SEQ_FEATURE                | calcium-binding region:1                                              | 3            | 4.40E-01       | 1.00E+00         |
|                              | INTERPRO                      | <a href="#">EF hand</a>                                               | 3            | 4.90E-01       | 1.00E+00         |
|                              | INTERPRO                      | <a href="#">Calcium-binding EF-hand</a>                               | 3            | 5.40E-01       | 1.00E+00         |
|                              | SMART                         | <a href="#">EFh</a>                                                   | 3            | 6.80E-01       | 1.00E+00         |
| <b>Annotation Cluster 22</b> | <b>Enrichment Score: 1.31</b> |                                                                       | <b>Count</b> | <b>P_Value</b> | <b>Benjamini</b> |
|                              | GOTERM_BP_FAT                 | <a href="#">cell migration</a>                                        | 11           | 4.70E-03       | 1.40E-01         |
|                              | GOTERM_BP_FAT                 | <a href="#">cell motion</a>                                           | 15           | 5.70E-03       | 1.50E-01         |
|                              | GOTERM_BP_FAT                 | <a href="#">cell motility</a>                                         | 11           | 9.70E-03       | 2.10E-01         |
|                              | GOTERM_BP_FAT                 | <a href="#">localization of cell</a>                                  | 11           | 9.70E-03       | 2.10E-01         |
|                              | SP_PIR_KEYWORDS               | <a href="#">inflammatory response</a>                                 | 5            | 1.30E-02       | 1.40E-01         |
|                              | GOTERM_BP_FAT                 | <a href="#">cell chemotaxis</a>                                       | 4            | 1.60E-02       | 2.60E-01         |
|                              | KEGG_PATHWAY                  | <a href="#">Cytokine-cytokine receptor interaction</a>                | 11           | 2.10E-02       | 1.10E-01         |
|                              | GOTERM_BP_FAT                 | <a href="#">taxis</a>                                                 | 7            | 2.30E-02       | 3.20E-01         |
|                              | GOTERM_BP_FAT                 | <a href="#">chemotaxis</a>                                            | 7            | 2.30E-02       | 3.20E-01         |
|                              | INTERPRO                      | <a href="#">Small chemokine, C-C group, conserved site</a>            | 3            | 3.90E-02       | 6.70E-01         |
|                              | PIRS_SUPERFAMILY              | PIRSF001950:small inducible chemokine, C/CC types                     | 3            | 5.10E-02       | 8.10E-01         |
|                              | GOTERM_BP_FAT                 | <a href="#">locomotory behavior</a>                                   | 8            | 8.20E-02       | 6.10E-01         |
|                              | GOTERM_BP_FAT                 | <a href="#">leukocyte chemotaxis</a>                                  | 3            | 9.10E-02       | 6.30E-01         |
|                              | INTERPRO                      | <a href="#">Small chemokine, interleukin-8-like</a>                   | 3            | 9.40E-02       | 8.00E-01         |
|                              | GOTERM_BP_FAT                 | <a href="#">behavior</a>                                              | 11           | 1.10E-01       | 6.70E-01         |
|                              | GOTERM_MF_FAT                 | <a href="#">chemokine activity</a>                                    | 3            | 1.20E-01       | 7.30E-01         |
|                              | GOTERM_MF_FAT                 | <a href="#">chemokine receptor binding</a>                            | 3            | 1.40E-01       | 7.60E-01         |
|                              | SMART                         | <a href="#">SCY</a>                                                   | 3            | 1.40E-01       | 9.50E-01         |
|                              | SP_PIR_KEYWORDS               | <a href="#">cytokine</a>                                              | 5            | 1.60E-01       | 6.10E-01         |
|                              | GOTERM_BP_FAT                 | <a href="#">leukocyte migration</a>                                   | 3            | 1.80E-01       | 7.90E-01         |

|                              |                               |                                                                       |              |                |                  |
|------------------------------|-------------------------------|-----------------------------------------------------------------------|--------------|----------------|------------------|
|                              | BBID                          | <a href="#">109.Chemokine_families</a>                                | 3            | 2.00E-01       | 9.60E-01         |
|                              | SP_PIR_KEYWORDS               | <a href="#">chemotaxis</a>                                            | 3            | 2.10E-01       | 6.70E-01         |
|                              | GOTERM_MF_FAT                 | <a href="#">cytokine activity</a>                                     | 5            | 2.60E-01       | 8.70E-01         |
| <b>Annotation Cluster 23</b> | <b>Enrichment Score: 1.31</b> |                                                                       | <b>Count</b> | <b>P_Value</b> | <b>Benjamini</b> |
|                              | GOTERM_BP_FAT                 | <a href="#">virus-host interaction</a>                                | 3            | 3.00E-02       | 3.80E-01         |
|                              | GOTERM_BP_FAT                 | <a href="#">viral reproductive process</a>                            | 4            | 5.30E-02       | 4.90E-01         |
|                              | GOTERM_BP_FAT                 | <a href="#">viral reproduction</a>                                    | 4            | 7.30E-02       | 5.80E-01         |
| <b>Annotation Cluster 24</b> | <b>Enrichment Score: 1.31</b> |                                                                       | <b>Count</b> | <b>P_Value</b> | <b>Benjamini</b> |
|                              | GOTERM_BP_FAT                 | <a href="#">negative regulation of immune system process</a>          | 7            | 9.50E-04       | 4.60E-02         |
|                              | GOTERM_BP_FAT                 | <a href="#">negative regulation of lymphocyte activation</a>          | 3            | 1.70E-01       | 7.70E-01         |
|                              | GOTERM_BP_FAT                 | <a href="#">negative regulation of leukocyte activation</a>           | 3            | 1.80E-01       | 7.90E-01         |
|                              | GOTERM_BP_FAT                 | <a href="#">negative regulation of cell activation</a>                | 3            | 2.00E-01       | 8.10E-01         |
| <b>Annotation Cluster 25</b> | <b>Enrichment Score: 1.29</b> |                                                                       | <b>Count</b> | <b>P_Value</b> | <b>Benjamini</b> |
|                              | SP_PIR_KEYWORDS               | <a href="#">sushi</a>                                                 | 4            | 2.80E-02       | 2.30E-01         |
|                              | INTERPRO                      | <a href="#">Sushi/SCR/CCP</a>                                         | 4            | 3.40E-02       | 6.50E-01         |
|                              | INTERPRO                      | <a href="#">Complement control module</a>                             | 4            | 3.50E-02       | 6.50E-01         |
|                              | SMART                         | <a href="#">CCP</a>                                                   | 4            | 6.20E-02       | 8.90E-01         |
|                              | UP_SEQ_FEATURE                | domain:Sushi 2                                                        | 3            | 9.50E-02       | 9.30E-01         |
|                              | UP_SEQ_FEATURE                | domain:Sushi 1                                                        | 3            | 9.50E-02       | 9.30E-01         |
| <b>Annotation Cluster 26</b> | <b>Enrichment Score: 1.26</b> |                                                                       | <b>Count</b> | <b>P_Value</b> | <b>Benjamini</b> |
|                              | GOTERM_BP_FAT                 | <a href="#">cellular calcium ion homeostasis</a>                      | 8            | 1.30E-02       | 2.30E-01         |
|                              | GOTERM_BP_FAT                 | <a href="#">calcium ion homeostasis</a>                               | 8            | 1.50E-02       | 2.50E-01         |
|                              | GOTERM_BP_FAT                 | <a href="#">cellular metal ion homeostasis</a>                        | 8            | 1.80E-02       | 2.80E-01         |
|                              | GOTERM_BP_FAT                 | <a href="#">metal ion homeostasis</a>                                 | 8            | 2.30E-02       | 3.20E-01         |
|                              | GOTERM_BP_FAT                 | <a href="#">cellular di-, tri-valent inorganic cation homeostasis</a> | 8            | 3.70E-02       | 4.20E-01         |
|                              | GOTERM_BP_FAT                 | <a href="#">cation homeostasis</a>                                    | 9            | 4.30E-02       | 4.50E-01         |
|                              | GOTERM_BP_FAT                 | <a href="#">di-, tri-valent inorganic cation homeostasis</a>          | 8            | 4.60E-02       | 4.70E-01         |
|                              | GOTERM_BP_FAT                 | <a href="#">homeostatic process</a>                                   | 17           | 5.20E-02       | 4.90E-01         |
|                              | GOTERM_BP_FAT                 | <a href="#">cellular cation homeostasis</a>                           | 8            | 6.00E-02       | 5.20E-01         |
|                              | GOTERM_BP_FAT                 | <a href="#">elevation of cytosolic calcium ion concentration</a>      | 5            | 6.40E-02       | 5.40E-01         |
|                              | GOTERM_BP_FAT                 | <a href="#">cytosolic calcium ion homeostasis</a>                     | 5            | 7.90E-02       | 6.00E-01         |
|                              | GOTERM_BP_FAT                 | <a href="#">cellular homeostasis</a>                                  | 11           | 1.10E-01       | 6.70E-01         |
|                              | GOTERM_BP_FAT                 | <a href="#">ion homeostasis</a>                                       | 10           | 1.10E-01       | 6.70E-01         |
|                              | GOTERM_BP_FAT                 | <a href="#">cellular ion homeostasis</a>                              | 9            | 1.40E-01       | 7.20E-01         |
|                              | GOTERM_BP_FAT                 | <a href="#">cellular chemical homeostasis</a>                         | 9            | 1.50E-01       | 7.40E-01         |
|                              | GOTERM_BP_FAT                 | <a href="#">chemical homeostasis</a>                                  | 10           | 2.70E-01       | 8.80E-01         |
| <b>Annotation Cluster 27</b> | <b>Enrichment Score: 1.2</b>  |                                                                       | <b>Count</b> | <b>P_Value</b> | <b>Benjamini</b> |
|                              | UP_SEQ_FEATURE                | domain:SH3                                                            | 7            | 1.90E-02       | 6.80E-01         |
|                              | SP_PIR_KEYWORDS               | <a href="#">sh3 domain</a>                                            | 7            | 3.70E-02       | 2.60E-01         |
|                              | INTERPRO                      | <a href="#">Src homology-3 domain</a>                                 | 7            | 5.30E-02       | 7.30E-01         |
|                              | SMART                         | <a href="#">SH3</a>                                                   | 7            | 1.30E-01       | 9.80E-01         |
|                              | INTERPRO                      | <a href="#">Variant SH3</a>                                           | 3            | 2.00E-01       | 9.20E-01         |
| <b>Annotation Cluster 28</b> | <b>Enrichment Score: 1.16</b> |                                                                       | <b>Count</b> | <b>P_Value</b> | <b>Benjamini</b> |
|                              | INTERPRO                      | <a href="#">Calponin-like actin-binding</a>                           | 5            | 1.20E-02       | 4.30E-01         |
|                              | SMART                         | <a href="#">CH</a>                                                    | 5            | 2.70E-02       | 8.50E-01         |
|                              | UP_SEQ_FEATURE                | domain:CH                                                             | 3            | 8.70E-02       | 9.30E-01         |
|                              | SP_PIR_KEYWORDS               | <a href="#">cytoskeleton</a>                                          | 6            | 8.70E-01       | 1.00E+00         |
| <b>Annotation Cluster 29</b> | <b>Enrichment Score: 1.14</b> |                                                                       | <b>Count</b> | <b>P_Value</b> | <b>Benjamini</b> |
|                              | KEGG_PATHWAY                  | <a href="#">Toll-like receptor signaling pathway</a>                  | 7            | 1.00E-02       | 8.90E-02         |
|                              | GOTERM_BP_FAT                 | <a href="#">response to lipopolysaccharide</a>                        | 4            | 8.90E-02       | 6.20E-01         |
|                              | GOTERM_BP_FAT                 | <a href="#">response to molecule of bacterial origin</a>              | 4            | 1.10E-01       | 6.80E-01         |
|                              | GOTERM_BP_FAT                 | <a href="#">response to bacterium</a>                                 | 5            | 2.70E-01       | 8.80E-01         |
| <b>Annotation Cluster 30</b> | <b>Enrichment Score: 1.1</b>  |                                                                       | <b>Count</b> | <b>P_Value</b> | <b>Benjamini</b> |
|                              | SP_PIR_KEYWORDS               | <a href="#">phosphotransferase</a>                                    | 7            | 3.10E-02       | 2.40E-01         |
|                              | SP_PIR_KEYWORDS               | <a href="#">autophosphorylation</a>                                   | 3            | 1.10E-01       | 5.20E-01         |
|                              | SP_PIR_KEYWORDS               | <a href="#">ATP</a>                                                   | 6            | 1.40E-01       | 5.90E-01         |
| <b>Annotation Cluster 31</b> | <b>Enrichment Score: 1.09</b> |                                                                       | <b>Count</b> | <b>P_Value</b> | <b>Benjamini</b> |
|                              | GOTERM_BP_FAT                 | <a href="#">muscle organ development</a>                              | 8            | 2.60E-02       | 3.40E-01         |
|                              | GOTERM_BP_FAT                 | <a href="#">muscle tissue development</a>                             | 5            | 9.20E-02       | 6.30E-01         |
|                              | GOTERM_BP_FAT                 | <a href="#">striated muscle tissue development</a>                    | 4            | 2.20E-01       | 8.40E-01         |



| Annotation Cluster    | Enrichment Score       |                 | Count                                                                                 | P_Value  | Benjamini |          |
|-----------------------|------------------------|-----------------|---------------------------------------------------------------------------------------|----------|-----------|----------|
| Annotation Cluster 32 | Enrichment Score: 1.09 | GOTERM_CC_FAT   | <a href="#">platelet alpha granule</a>                                                | 5        | 7.90E-03  | 1.30E-01 |
|                       |                        | GOTERM_CC_FAT   | <a href="#">platelet alpha granule lumen</a>                                          | 4        | 2.00E-02  | 2.60E-01 |
|                       |                        | GOTERM_CC_FAT   | <a href="#">cytoplasmic membrane-bounded vesicle lumen</a>                            | 4        | 2.40E-02  | 2.90E-01 |
|                       |                        | GOTERM_CC_FAT   | <a href="#">vesicle lumen</a>                                                         | 4        | 2.70E-02  | 2.80E-01 |
|                       |                        | GOTERM_CC_FAT   | <a href="#">secretory granule</a>                                                     | 6        | 1.10E-01  | 6.80E-01 |
|                       |                        | GOTERM_CC_FAT   | <a href="#">cytoplasmic vesicle part</a>                                              | 6        | 1.20E-01  | 7.00E-01 |
|                       |                        | GOTERM_CC_FAT   | <a href="#">cytoplasmic membrane-bounded vesicle</a>                                  | 11       | 2.50E-01  | 8.70E-01 |
|                       |                        | GOTERM_CC_FAT   | <a href="#">membrane-bounded vesicle</a>                                              | 11       | 2.80E-01  | 8.90E-01 |
|                       |                        | GOTERM_CC_FAT   | <a href="#">vesicle</a>                                                               | 12       | 3.40E-01  | 9.20E-01 |
|                       |                        | GOTERM_CC_FAT   | <a href="#">cytoplasmic vesicle</a>                                                   | 11       | 4.20E-01  | 9.40E-01 |
| Annotation Cluster 33 | Enrichment Score: 1.06 | SP_PIR_KEYWORDS | <a href="#">laminin egf-like domain</a>                                               | 3        | 4.80E-02  | 3.20E-01 |
|                       |                        | INTERPRO        | <a href="#">EGF-like_laminin</a>                                                      | 3        | 9.40E-02  | 8.00E-01 |
|                       |                        | SMART           | <a href="#">EGF_Lam</a>                                                               | 3        | 1.40E-01  | 9.50E-01 |
| Annotation Cluster 34 | Enrichment Score: 1.06 | GOTERM_MF_FAT   | <a href="#">glycosaminoglycan binding</a>                                             | 8        | 2.60E-03  | 2.20E-01 |
|                       |                        | GOTERM_MF_FAT   | <a href="#">polysaccharide binding</a>                                                | 8        | 4.40E-03  | 2.90E-01 |
|                       |                        | GOTERM_MF_FAT   | <a href="#">pattern binding</a>                                                       | 8        | 4.40E-03  | 2.90E-01 |
|                       |                        | GOTERM_MF_FAT   | <a href="#">peptidoglycan binding</a>                                                 | 3        | 5.90E-03  | 2.80E-01 |
|                       |                        | GOTERM_MF_FAT   | <a href="#">carbohydrate binding</a>                                                  | 12       | 7.50E-03  | 3.00E-01 |
|                       |                        | GOTERM_BP_FAT   | <a href="#">positive regulation of tumor necrosis factor production</a>               | 3        | 1.70E-02  | 2.70E-01 |
|                       |                        | GOTERM_BP_FAT   | <a href="#">regulation of tumor necrosis factor production</a>                        | 3        | 6.70E-02  | 5.50E-01 |
|                       |                        | GOTERM_BP_FAT   | <a href="#">positive regulation of cytokine production</a>                            | 4        | 1.30E-01  | 7.00E-01 |
|                       |                        | GOTERM_BP_FAT   | <a href="#">positive regulation of MAPKKK cascade</a>                                 | 3        | 1.40E-01  | 7.20E-01 |
|                       |                        | UP_SEQ_FEATURE  | repeat:LRR 4                                                                          | 6        | 1.80E-01  | 9.80E-01 |
|                       |                        | UP_SEQ_FEATURE  | repeat:LRR 6                                                                          | 5        | 2.30E-01  | 9.90E-01 |
|                       |                        | GOTERM_BP_FAT   | <a href="#">response to bacterium</a>                                                 | 5        | 2.70E-01  | 8.80E-01 |
|                       |                        | UP_SEQ_FEATURE  | repeat:LRR 3                                                                          | 6        | 2.80E-01  | 1.00E+00 |
|                       |                        | INTERPRO        | <a href="#">Leucine-rich repeat</a>                                                   | 5        | 2.80E-01  | 9.70E-01 |
|                       |                        | UP_SEQ_FEATURE  | repeat:LRR 5                                                                          | 5        | 2.90E-01  | 1.00E+00 |
|                       |                        | UP_SEQ_FEATURE  | repeat:LRR 1                                                                          | 6        | 3.20E-01  | 1.00E+00 |
|                       |                        | SP_PIR_KEYWORDS | <a href="#">leucine-rich repeat</a>                                                   | 6        | 3.30E-01  | 7.80E-01 |
|                       |                        | UP_SEQ_FEATURE  | repeat:LRR 2                                                                          | 6        | 3.30E-01  | 1.00E+00 |
|                       |                        | UP_SEQ_FEATURE  | repeat:LRR 9                                                                          | 3        | 4.70E-01  | 1.00E+00 |
|                       |                        | UP_SEQ_FEATURE  | repeat:LRR 8                                                                          | 3        | 5.30E-01  | 1.00E+00 |
| UP_SEQ_FEATURE        | repeat:LRR 7           | 3               | 6.20E-01                                                                              | 1.00E+00 |           |          |
| Annotation Cluster 35 | Enrichment Score: 1.06 | INTERPRO        | <a href="#">EGF-like region, conserved site</a>                                       | 11       | 4.10E-03  | 3.50E-01 |
|                       |                        | SP_PIR_KEYWORDS | <a href="#">egf-like domain</a>                                                       | 7        | 5.40E-02  | 3.40E-01 |
|                       |                        | INTERPRO        | <a href="#">EGF</a>                                                                   | 5        | 7.70E-02  | 7.80E-01 |
|                       |                        | INTERPRO        | <a href="#">EGF-like, type 3</a>                                                      | 6        | 9.90E-02  | 8.10E-01 |
|                       |                        | INTERPRO        | <a href="#">EGF-like</a>                                                              | 6        | 1.10E-01  | 8.30E-01 |
|                       |                        | INTERPRO        | <a href="#">EGF-type aspartate/asparagine hydroxylation conserved site</a>            | 4        | 1.20E-01  | 8.50E-01 |
|                       |                        | UP_SEQ_FEATURE  | domain:EGF-like 2; calcium-binding                                                    | 3        | 1.40E-01  | 9.80E-01 |
|                       |                        | SMART           | <a href="#">EGF</a>                                                                   | 6        | 2.30E-01  | 9.50E-01 |
|                       |                        | UP_SEQ_FEATURE  | domain:EGF-like 1                                                                     | 3        | 4.10E-01  | 1.00E+00 |
| Annotation Cluster 36 | Enrichment Score: 1.04 | GOTERM_MF_FAT   | <a href="#">identical protein binding</a>                                             | 15       | 4.50E-02  | 5.50E-01 |
|                       |                        | GOTERM_MF_FAT   | <a href="#">protein dimerization activity</a>                                         | 12       | 1.10E-01  | 7.20E-01 |
|                       |                        | GOTERM_MF_FAT   | <a href="#">protein homodimerization activity</a>                                     | 8        | 1.60E-01  | 7.60E-01 |
| Annotation Cluster 37 | Enrichment Score: 1.04 | GOTERM_BP_FAT   | <a href="#">activation of immune response</a>                                         | 8        | 3.00E-04  | 2.50E-02 |
|                       |                        | GOTERM_BP_FAT   | <a href="#">innate immune response</a>                                                | 6        | 4.10E-02  | 4.50E-01 |
|                       |                        | SP_PIR_KEYWORDS | <a href="#">innate immunity</a>                                                       | 4        | 6.30E-02  | 3.70E-01 |
|                       |                        | GOTERM_BP_FAT   | <a href="#">humoral immune response</a>                                               | 4        | 9.40E-02  | 6.40E-01 |
|                       |                        | GOTERM_BP_FAT   | <a href="#">complement activation</a>                                                 | 3        | 1.10E-01  | 6.80E-01 |
|                       |                        | GOTERM_BP_FAT   | <a href="#">activation of plasma proteins involved in acute inflammatory response</a> | 3        | 1.20E-01  | 6.80E-01 |
|                       |                        | KEGG_PATHWAY    | <a href="#">Complement and coagulation cascades</a>                                   | 4        | 1.30E-01  | 4.40E-01 |

|                              |                               |                                                             |              |                |                  |
|------------------------------|-------------------------------|-------------------------------------------------------------|--------------|----------------|------------------|
|                              | GOTERM_BP_FAT                 | <a href="#">protein maturation by peptide bond cleavage</a> | 3            | 3.30E-01       | 9.20E-01         |
|                              | GOTERM_BP_FAT                 | <a href="#">acute inflammatory response</a>                 | 3            | 3.90E-01       | 9.50E-01         |
|                              | GOTERM_BP_FAT                 | <a href="#">protein processing</a>                          | 3            | 4.50E-01       | 9.70E-01         |
|                              | GOTERM_BP_FAT                 | <a href="#">protein maturation</a>                          | 3            | 5.00E-01       | 9.80E-01         |
| <b>Annotation Cluster 38</b> | <b>Enrichment Score: 1.01</b> |                                                             | <b>Count</b> | <b>P_Value</b> | <b>Benjamini</b> |
|                              | INTERPRO                      | <a href="#">von Willebrand factor, type A</a>               | 4            | 7.80E-02       | 7.70E-01         |
|                              | UP_SEQ_FEATURE                | short sequence motif:Cell attachment site                   | 4            | 8.60E-02       | 9.30E-01         |
|                              | SMART                         | <a href="#">VWA</a>                                         | 4            | 1.40E-01       | 9.70E-01         |
| <b>Annotation Cluster 39</b> | <b>Enrichment Score: 0.98</b> |                                                             | <b>Count</b> | <b>P_Value</b> | <b>Benjamini</b> |
|                              | UP_SEQ_FEATURE                | domain:CUB 1                                                | 3            | 6.70E-02       | 9.10E-01         |
|                              | UP_SEQ_FEATURE                | domain:CUB 2                                                | 3            | 6.70E-02       | 9.10E-01         |
|                              | INTERPRO                      | <a href="#">CUB</a>                                         | 3            | 1.40E-01       | 8.60E-01         |
|                              | SMART                         | <a href="#">CUB</a>                                         | 3            | 2.00E-01       | 9.40E-01         |
