# Supplementary material for: Intrarenal activation of adaptive immune effectors is associated with tubular damage and impaired renal function in lupus nephritis
Source: PubMed Central journal article supplement (PMC6241616; doi:10.1136/annrheumdis-2018-213485), 2018-07-31
Supplement: annrheumdis-2018-213485supp008.pdf [file annrheumdis-2018-213485supp008.pdf]

Supplementary Table 5 : Transcripts and DAVID pathways correlating with the expression of CD4 in lupus kidney biopsies

| Positive correlation |             |                                  |                         | Negative correlation |                     |                                  |                        |
|----------------------|-------------|----------------------------------|-------------------------|----------------------|---------------------|----------------------------------|------------------------|
| Transcripts          |             | Pathways                         |                         | Transcripts          |                     | Pathways                         |                        |
| Identifier           | Gene Symbol | Correlation coefficient with CD4 |                         | Identifier           | Gene Symbol         | Correlation coefficient with CD4 |                        |
| ILMN_177284          | CD4         | 1                                | Annotation Cluster 1    | ILMN_181839          | C2H2 zinc finger pr | -0.4001384                       | Enrichment Score: 3.16 |
| ILMN_177218          | HLA-DPA1    | 0.93423063                       | Enrichment Score: 26.47 | ILMN_176854          | RIBC1               | -0.400186083                     | INTERPRO               |
| ILMN_177897          | TYROBP      | 0.93302249                       | GOTERM_BP_FAT           | ILMN_1699190         | SORCS1              | -0.400223681                     | SMART                  |
| ILMN_168955          | HLA-DRA     | 0.915891173                      | SP_PIR_KEYWORDS         | ILMN_1249088         | CS93432             | -0.400282515                     | SP_PIR_KEYWORDS        |
| ILMN_322688          | HLA-DRB1    | 0.906190291                      | SP_PIR_KEYWORDS         | ILMN_1680836         | LSH2                | -0.400299744                     | GOTERM_MF_FAT          |
| ILMN_215744          | HLA-DRA     | 0.902995651                      | GOTERM_CC_FAT           | ILMN_1722755         | KITAP2-2            | -0.400334007                     | GOTERM_MF_FAT          |
| ILMN_206066          | HLA-DRB6    | 0.901513142                      | SP_PIR_KEYWORDS         | ILMN_331071          | MIR12D              | -0.400359894                     | INTERPRO               |
| ILMN_1736567         | CD74        | 0.900464276                      | GOTERM_CC_FAT           | ILMN_1799903         | GALNT11             | -0.400392176                     | GOTERM_MF_FAT          |
| ILMN_236630          | FERMT3      | 0.895532157                      | GOTERM_BP_FAT           | ILMN_1754727         | ARMCOS              | -0.40044397                      | GOTERM_MF_FAT          |
| ILMN_1815895         | HLA-DRB1    | 0.895853418                      | GOTERM_CC_FAT           | ILMN_1666020         | LOC644662           | -0.400562184                     | GOTERM_BP_FAT          |
| ILMN_237644          | CD74        | 0.890964861                      | GOTERM_MF_FAT           | ILMN_2369826         | C16orf13            | -0.400526661                     | GOTERM_BP_FAT          |
| ILMN_2049536         | TRPA2       | 0.889679914                      | GOTERM_CC_FAT           | ILMN_2366554         | SIC355              | -0.400563498                     | UP_SEQ_FEATURE         |
| ILMN_1718936         | LST1        | 0.886044814                      | GOTERM_CC_FAT           | ILMN_1830903         | BG32588             | -0.400578134                     | GOTERM_BP_FAT          |
| ILMN_171858          | PARP12      | 0.883825964                      | GOTERM_CC_FAT           | ILMN_233122          | TNFRSF68            | -0.400582848                     | KEGG_PATHWAY           |
| ILMN_3240316         | TMSB4X      | 0.881816413                      | GOTERM_CC_FAT           | ILMN_1700169         | C15orf44            | -0.400627977                     | GOTERM_CC_FAT          |
| ILMN_1683026         | PSMB10      | 0.881679636                      | GOTERM_CC_FAT           | ILMN_1771689         | EXO2                | -0.400641297                     | GOTERM_BP_FAT          |
| ILMN_217887          | BANF1       | 0.881663753                      | GOTERM_MF_FAT           | ILMN_1679134         | NSMCEA4             | -0.400646612                     | GOTERM_BP_FAT          |
| ILMN_1786512         | PSME2       | 0.881166528                      | GOTERM_CC_FAT           | ILMN_1838375         | BMT1348             | -0.400665624                     | INTERPRO               |
| ILMN_165328          | CHFR        | 0.879799743                      | Annotation Cluster 2    | ILMN_1653266         | DNAJB14             | -0.400749707                     | GOTERM_MF_FAT          |
| ILMN_175842          | DGLAP4      | 0.875737515                      | Enrichment Score: 10.95 | ILMN_1719316         | TMED3               | -0.400813303                     | GOTERM_MF_FAT          |
| ILMN_1668039         | GYPC        | 0.874017008                      | GOTERM_CC_FAT           | ILMN_2327233         | AK126616            | -0.400896267                     | GOTERM_MF_FAT          |
| ILMN_1752340         | ARFS        | 0.871364059                      | GOTERM_CC_FAT           | ILMN_1699276         | GOP51               | -0.400929288                     | SP_PIR_KEYWORDS        |
| ILMN_1654139         | HAPLN3      | 0.86967548                       | Annotation Cluster 3    | ILMN_1790595         | TPAP2E              | -0.401012982                     | UP_SEQ_FEATURE         |
| ILMN_2390299         | PSMB8       | 0.868740369                      | Enrichment Score: 10.64 | ILMN_1734559         | SORD                | -0.401032426                     | INTERPRO               |
| ILMN_1747195         | PSMB8       | 0.866391356                      | GOTERM_CC_FAT           | ILMN_1698731         | SEC1B               | -0.401253836                     | INTERPRO               |
| ILMN_2167063         | FCGR1C      | 0.866366101                      | GOTERM_CC_FAT           | ILMN_1652313         | FN3KRP              | -0.401355089                     | SMART                  |
| ILMN_2111739         | MAN2C1      | 0.866279082                      | GOTERM_CC_FAT           | ILMN_2052863         | RNF5                | -0.401425107                     | INTERPRO               |
| ILMN_1807277         | RIBD        | 0.86456805                       | GOTERM_CC_FAT           | ILMN_3311095         | MIR643              | -0.401427458                     | INTERPRO               |
| ILMN_1794473         | PHF17       | 0.861385852                      | GOTERM_CC_FAT           | ILMN_1663263         | EPHA10              | -0.401428905                     | UP_SEQ_FEATURE         |
| ILMN_1758250         | TFRF1D      | 0.862860569                      | Annotation Cluster 4    | ILMN_325211          | KIAA2015            | -0.401494305                     | GOTERM_MF_FAT          |
| ILMN_1772359         | LAPTMS      | 0.862504464                      | Enrichment Score: 6.84  | ILMN_1676548         | BZW2                | -0.401528449                     | SP_PIR_KEYWORDS        |
| ILMN_1678989         | GSTP1       | 0.861629683                      | GOTERM_BP_FAT           | ILMN_1709020         | MYBL2               | -0.401560655                     | SP_PIR_KEYWORDS        |
| ILMN_1651395         | MARCKL1     | 0.861514887                      | UP_SEQ_FEATURE          | ILMN_1650410         | LOC61010            | -0.401623441                     | SMART                  |
| ILMN_1778360         | PYGB        | 0.861254289                      | SP_PIR_KEYWORDS         | ILMN_1285238         | BXS3784             | -0.401625554                     | INTERPRO               |
| ILMN_2349658         | TSP0        | 0.860302388                      | GOTERM_BP_FAT           | ILMN_1701239         | SPRR2E              | -0.401646777                     | GOTERM_MF_FAT          |
| ILMN_1740015         | CD14        | 0.858388684                      | GOTERM_BP_FAT           | ILMN_2288290         | CDY1B               | -0.4017477                       | UP_SEQ_FEATURE         |
| ILMN_1760683         | SRSF9       | 0.857616844                      | GOTERM_BP_FAT           | ILMN_1674297         | HCFC2               | -0.401754371                     | UP_SEQ_FEATURE         |
| ILMN_2062468         | GIF897      | 0.857502495                      | GOTERM_BP_FAT           | ILMN_1769071         | XXRK                | -0.401801838                     | SMART                  |
| ILMN_1715824         | ISS         | 0.857390466                      | GOTERM_BP_FAT           | ILMN_222006          | SEB8P1              | -0.401804507                     | Annotation Cluster 3   |
| ILMN_1723706         | GRAMD4      | 0.856571802                      | GOTERM_BP_FAT           | ILMN_1772216         | HIST1H3B            | -0.401878556                     | Enrichment Score: 2.62 |
| ILMN_1782057         | ATP8B2      | 0.855792595                      | Annotation Cluster 6    | ILMN_1781672         | GAB1                | -0.401901556                     | SP_PIR_KEYWORDS        |
| ILMN_2366041         | ITM2C       | 0.855750662                      | Enrichment Score: 4.78  | ILMN_1668052         | ZCH6                | -0.401907906                     | GOTERM_BP_FAT          |
| ILMN_1761464         | CD74        | 0.854043623                      | SP_PIR_KEYWORDS         | ILMN_1736045         | CNN316              | -0.401981532                     | GOTERM_BP_FAT          |
| ILMN_1689768         | PLEKHO2     | 0.853912744                      | GOTERM_BP_FAT           | ILMN_2389528         | MFL5                | -0.401980891                     | GOTERM_BP_FAT          |
| ILMN_1680453         | ITM2C       | 0.853816711                      | GOTERM_BP_FAT           | ILMN_1805942         | FHL1                | -0.401998765                     | GOTERM_BP_FAT          |
| ILMN_1691892         | TAGLN2      | 0.853601352                      | GOTERM_BP_FAT           | ILMN_1791072         | SMARCA2             | -0.402008817                     | GOTERM_BP_FAT          |
| ILMN_1683271         | TMSB4X      | 0.853486495                      | GOTERM_BP_FAT           | ILMN_1806022         | RNF212              | -0.402016792                     | GOTERM_BP_FAT          |
| ILMN_1785005         | NCF4        | 0.852288271                      | SP_PIR_KEYWORDS         | ILMN_1760849         | NETO2               | -0.402029764                     | GOTERM_BP_FAT          |
| ILMN_1685005         | TNFRSF1A    | 0.852016046                      | KEGG_PATHWAY            | ILMN_3277402         | LOC441242           | -0.402055879                     | GOTERM_BP_FAT          |
| ILMN_1741371         | TMEM8A      | 0.851368336                      | GOTERM_BP_FAT           | ILMN_1732834         | SHISA6              | -0.40209057                      | Annotation Cluster 4   |
| ILMN_1752592         | HLA-DRB4    | 0.851187445                      | GOTERM_BP_FAT           | ILMN_1749020         | ACAD5B              | -0.402369663                     | Enrichment Score: 2.24 |
| ILMN_2400947         | CLF2        | 0.850982825                      | GOTERM_BP_FAT           | ILMN_1727252         | WNT8A               | -0.402361321                     | GOTERM_CC_FAT          |
| ILMN_2370772         | EIF4G1      | 0.850763294                      | GOTERM_CC_FAT           | ILMN_1791679         | DNER                | -0.402409976                     | SP_PIR_KEYWORDS        |
| ILMN_1712950         | PFN1        | 0.850509837                      | GOTERM_BP_FAT           | ILMN_1748113         | DPY19L2P2           | -0.402417622                     | UP_SEQ_FEATURE         |
| ILMN_1793950         | POTEM       | 0.849590981                      | GOTERM_BP_FAT           | ILMN_1751036         | SMAO2               | -0.402437469                     | GOTERM_CC_FAT          |
| ILMN_1669550         | MAD2L2      | 0.849558148                      | Annotation Cluster 7    | ILMN_1823229         | BKOR9472            | -0.4024611                       | GOTERM_CC_FAT          |
| ILMN_1717261         | HLA-DRB1    | 0.84901389                       | GOTERM_BP_FAT           | ILMN_1769704         | FLJ39632            | -0.402484676                     | GOTERM_CC_FAT          |
| ILMN_1659868         | IGALS3BP    | 0.8488939                        | GOTERM_BP_FAT           | ILMN_2101025         | ZNF750              | -0.402489395                     | GOTERM_CC_FAT          |
| ILMN_1656823         | RPL18A      | 0.848663905                      | GOTERM_BP_FAT           | ILMN_1724149         | OCIN                | -0.40249038                      | Annotation Cluster 5   |
| ILMN_1745148         | ZNFK1       | 0.848323215                      | GOTERM_BP_FAT           | ILMN_2377862         | RABGA               | -0.402512772                     | Enrichment Score: 2.15 |
| ILMN_3194911         | ATF6B       | 0.847634385                      | GOTERM_BP_FAT           | ILMN_231804          | LOCN0011908-1       | -0.402518555                     | GOTERM_BP_FAT          |
| ILMN_175762          | GNAO2       | 0.847561057                      | GOTERM_BP_FAT           | ILMN_3310336         | MIR450A1            | -0.402559411                     | GOTERM_BP_FAT          |
| ILMN_1730676         | PHF2        | 0.847273916                      | GOTERM_BP_FAT           | ILMN_2203147         | TNFRP512            | -0.402569462                     | GOTERM_BP_FAT          |
| ILMN_1723978         | IGALS1      | 0.846002437                      | GOTERM_BP_FAT           | ILMN_1726815         | HIST1H3C            | -0.402576019                     | Annotation Cluster 6   |
| ILMN_1738116         | TMEM119     | 0.845930944                      | GOTERM_BP_FAT           | ILMN_1745110         | LAPTMA4             | -0.402758881                     | Enrichment Score: 2.04 |
| ILMN_1782538         | VIM         | 0.845340049                      | GOTERM_BP_FAT           | ILMN_1781764         | RPL36A              | -0.402746902                     | GOTERM_BP_FAT          |
| ILMN_1733947         | KIF9B       | 0.844848911                      | GOTERM_BP_FAT           | ILMN_1790302         | PAPP2               | -0.402751808                     | GOTERM_BP_FAT          |
| ILMN_2376108         | PSMB9       | 0.84365798                       | GOTERM_BP_FAT           | ILMN_1688831         | SYT7                | -0.402789128                     | Annotation Cluster 7   |
| ILMN_1687533         | SEMA4D      | 0.843172109                      | GOTERM_BP_FAT           | ILMN_1723574         | TSG1                | -0.402856432                     | Enrichment Score: 1.94 |
| ILMN_2287829         | EIF3B       | 0.842759453                      | GOTERM_BP_FAT           | ILMN_1821279         | BM678326            | -0.402875666                     | UP_SEQ_FEATURE         |
| ILMN_3229210         | FLJ45340    | 0.842202302                      | GOTERM_BP_FAT           | ILMN_1877778         | DA086964            | -0.402971114                     | INTERPRO               |
| ILMN_1770673         | ANKA        | 0.842092                         | GOTERM_BP_FAT           | ILMN_1678936         | NA                  | -0.403013806                     | Annotation Cluster 8   |
| ILMN_1653209         | PTRFNM1     | 0.84193988                       | GOTERM_BP_FAT           | ILMN_1781818         | FURB1               | -0.403030925                     | Enrichment Score: 1.43 |
| ILMN_1749011         | NCEP2       | 0.840455038                      | GOTERM_BP_FAT           | ILMN_3243098         | SNHG7               | -0.403056774                     | GOTERM_BP_FAT          |
| ILMN_2397934         | CTBP1       | 0.83935087                       | GOTERM_BP_FAT           | ILMN_1669486         | IMDC                | -0.403074616                     | GOTERM_BP_FAT          |
| ILMN_1695311         | HLA-DMA     | 0.838589567                      | GOTERM_BP_FAT           | ILMN_1908258         | BFS10793            | -0.403134314                     | GOTERM_BP_FAT          |
| ILMN_1755733         | RPLP2       | 0.838180672                      | GOTERM_BP_FAT           | ILMN_2099594         | SRP9                | -0.403137412                     | Annotation Cluster 9   |
| ILMN_2387496         | CRS2        | 0.837846899                      | GOTERM_BP_FAT           | ILMN_2156267         | EIF2AK1             | -0.403168571                     | Enrichment Score: 1.38 |
| ILMN_1768709         | POLR3H      | 0.837657317                      | GOTERM_BP_FAT           | ILMN_3150612         | FURP1               | -0.403195196                     | GOTERM_BP_FAT          |
| ILMN_1772486         | EIF2        | 0.835726208                      | INTERPRO                | ILMN_2147427         | DBL2D               | -0.403197796                     | GOTERM_MF_FAT          |
| ILMN_2120965         | NPAT        | 0.835607122                      | SP_PIR_KEYWORDS         | ILMN_2306565         | XAGE5               | -0.403237314                     | Annotation Cluster 10  |
| ILMN_1716547         | NAGK        | 0.834757851                      | INTERPRO                | ILMN_1747854         | GOLGA8E             | -0.403251728                     | Enrichment Score: 1.33 |
| ILMN_1749662         | GPX1        | 0.834646595                      | GOTERM_CC_FAT           | ILMN_1838254         | NA                  | -0.403262529                     | SP_PIR_KEYWORDS        |
| ILMN_1778255         | FARSA       | 0.834189514                      | SP_PIR_KEYWORDS         | ILMN_1662158         | RPL26L1             | -0.403302701                     | SP_PIR_KEYWORDS        |

|              |           |             |                        |                                                        |       |          |           |              |              |              |                        |                                                                          |       |          |           |
|--------------|-----------|-------------|------------------------|--------------------------------------------------------|-------|----------|-----------|--------------|--------------|--------------|------------------------|--------------------------------------------------------------------------|-------|----------|-----------|
| ILMN_1728224 | OGFR      | 0.834143823 | INTERPRO               | Proteasome_subunit_alpha/beta                          | 9     | 1.30E-03 | 2.40E-01  | ILMN_2415267 | RREB1        | -0.403322364 | GOTERM_MF_FAT          | purine nucleotide binding                                                | 231   | 2.60E-02 | 8.30E-01  |
| ILMN_2400935 | TAGLN     | 0.834136449 | SP_PIR_KEYWORDS        | threonine protease                                     | 9     | 1.40E-03 | 2.10E-02  | ILMN_3301599 | ZNF285A      | -0.403344101 | GOTERM_MF_FAT          | ribonucleotide binding                                                   | 219   | 4.50E-02 | 8.40E-01  |
| ILMN_1697567 | TPM3      | 0.833912646 | GOTERM_MF_FAT          | threonine-type serpinidase activity                    | 9     | 2.20E-03 | 1.20E-01  | ILMN_2266595 | ULIRAS       | -0.403391731 | GOTERM_MF_FAT          | ribonucleotide binding                                                   | 219   | 4.50E-02 | 8.40E-01  |
| ILMN_2310948 | RUF1F1    | 0.833741884 | GOTERM_MF_FAT          | threonine-type autoantigenase activity                 | 9     | 2.20E-03 | 1.20E-01  | ILMN_1653110 | ZNF580       | -0.403313767 | GOTERM_MF_FAT          | purine nucleotide binding                                                | 192   | 4.80E-02 | 8.50E-01  |
| ILMN_1606016 | RALY      | 0.833051016 | GOTERM_CC_FAT          | proteasome core complex                                | 9     | 2.80E-03 | 4.80E-02  | ILMN_1608148 | CHD5         | -0.403504114 | GOTERM_MF_FAT          | adenine nucleotide binding                                               | 189   | 5.20E-02 | 8.60E-01  |
| ILMN_1799815 | XYL72     | 0.832847321 | GOTERM_BP_FAT          | mitotic cell cycle                                     | 67    | 6.00E-03 | 1.40E-01  | ILMN_3242443 | SNORD918     | -0.403676051 | GOTERM_MF_FAT          | nucleotide binding                                                       | 192   | 6.10E-02 | 8.80E-01  |
| ILMN_1708858 | CNK1E     | 0.832300175 | KEGG_PATHWAY           | PIR500712multicatalytic endopeptidase complex chain C  | 15    | 7.20E-03 | 1.50E-01  | ILMN_1665970 | KIA00786     | -0.403690552 | GOTERM_MF_FAT          | adenine ribonucleotide binding                                           | 177   | 8.40E-02 | 9.20E-01  |
| ILMN_3237826 | CNTNAP3B  | 0.831914342 | PIR_SUPERFAMILY        | PIR500712multicatalytic endopeptidase complex chain C  | 4     | 2.00E-02 | 9.90E-01  | ILMN_3247310 | SNORD328     | -0.403796598 | GOTERM_MF_FAT          | ATP binding                                                              | 175   | 8.50E-02 | 9.20E-01  |
| ILMN_1678980 | THOC9     | 0.831782621 | UP_SEQ_FEATURE         | site:cleavage by autocatalysis                         | 3     | 4.00E-02 | 9.90E-01  | ILMN_3309724 | MIR509-2     | -0.403835321 | INTERPRO               | Protein kinase, cAMP                                                     | 61    | 8.90E-02 | 1.00E+00  |
| ILMN_2319158 | MAP2K5    | 0.831672126 | INTERPRO               | Proteinase T1A, acetonease beta-subunit                | 4     | 4.70E-02 | 9.90E-01  | ILMN_1654744 | LOC547946    | -0.403897899 | SP_PIR_KEYWORDS        | lysine                                                                   | 10    | 4.40E-02 | 9.80E-01  |
| ILMN_3234828 | TMEM229B  | 0.83164614  | GOTERM_BP_FAT          | ubiquitin-dependent protein catabolic process          | 42    | 5.30E-02 | 5.10E-01  | ILMN_1753249 | DOXV1        | -0.403932092 | UP_SEQ_FEATURE         | binding site:ATP                                                         | 63    | 2.60E-01 | 1.00E+00  |
| ILMN_1742450 | TAPB      | 0.831521403 | PIR_SUPERFAMILY        | PIR500714multicatalytic endopeptidase complex chain C3 | 3     | 9.10E-02 | 1.00E+00  | ILMN_1715416 | NUP188       | -0.403964757 | UP_SEQ_FEATURE         | nucleotide phosphate-binding region:ATP                                  | 108   | 2.80E-01 | 1.00E+00  |
| ILMN_1695341 | KNK10     | 0.831545574 | Enrichment Score: 4.36 |                                                        | Count | P-Value  | Benjamini | ILMN_1608066 | KFBT80       | -0.403966664 | Enrichment Score: 1.28 |                                                                          | Count | P-Value  | Benjamini |
| ILMN_1815083 | WHSC2     | 0.831045368 | SP_PIR_KEYWORDS        | sh3 domain                                             | 50    | 3.40E-06 | 1.00E-04  | ILMN_1688871 | NOL11        | -0.4039802   | GOTERM_BP_FAT          | negative regulation of phosphate metabolic process                       | 11    | 2.70E-02 | 9.60E-01  |
| ILMN_1774733 | SCS1      | 0.830948173 | UP_SEQ_FEATURE         | domain:SH3                                             | 41    | 6.30E-05 | 6.50E-02  | ILMN_3239981 | C10orf40     | -0.404014265 | GOTERM_BP_FAT          | negative regulation of phosphorus metabolic process                      | 11    | 2.70E-02 | 9.60E-01  |
| ILMN_1681998 | AP2B1     | 0.830807069 | INTERPRO               | Src homology-3 domain                                  | 48    | 8.80E-05 | 4.90E-02  | ILMN_1654744 | LOC547946    | -0.404030321 | GOTERM_BP_FAT          | negative regulation of phosphorelation                                   | 10    | 4.40E-02 | 9.80E-01  |
| ILMN_2396571 | GRP108    | 0.829917167 | SMART                  | SH3                                                    | 48    | 2.10E-04 | 4.30E-02  | ILMN_3187429 | LOC100130071 | -0.404042737 | GOTERM_BP_FAT          | negative regulation of protein amino acid phosphorylation                | 6     | 2.50E-01 | 9.90E-01  |
| ILMN_1704286 | FXYD5     | 0.829720773 | Enrichment Score: 4.32 |                                                        | Count | P-Value  | Benjamini | ILMN_3267319 | NO1          | -0.404072718 | Enrichment Score: 1.2  |                                                                          | Count | P-Value  | Benjamini |
| ILMN_2222688 | TMS84X    | 0.829404615 | GOTERM_BP_FAT          | regulation of protein kinase cascade                   | 64    | 1.60E-07 | 9.30E-05  | ILMN_3308768 | MIR3028      | -0.404077099 | GOTERM_BP_FAT          | branched chain family amino acid metabolic process                       | 6     | 2.10E-02 | 9.50E-01  |
| ILMN_1727043 | GLT1SD1   | 0.829394787 | GOTERM_BP_FAT          | positive regulation of L-kappa8/NF-kappa8 cascade      | 29    | 3.50E-05 | 2.90E-03  | ILMN_1694007 | ADRB3        | -0.404129866 | GOTERM_BP_FAT          | branched chain family amino acid catabolic process                       | 4     | 1.00E-01 | 9.80E-01  |
| ILMN_1654246 | SIRT6     | 0.829264864 | GOTERM_BP_FAT          | positive regulation of protein kinase cascade          | 42    | 4.70E-05 | 3.50E-03  | ILMN_1796303 | ULIRAS       | -0.404129836 | PIR_SUPERFAMILY        | Valine, leucine and isoleucine degradation                               | 9     | 1.10E-01 | 9.40E-01  |
| ILMN_2070052 | NPR13     | 0.828694714 | GOTERM_BP_FAT          | regulation of I-kappa8/NF-kappa8 cascade               | 39    | 9.20E-05 | 6.10E-03  | ILMN_1872266 | BM96100      | -0.404154714 | Enrichment Score: 1.19 |                                                                          | Count | P-Value  | Benjamini |
| ILMN_1701643 | GDPO5     | 0.828367608 | GOTERM_BP_FAT          | positive regulation of cell communication              | 66    | 4.70E-04 | 2.40E-02  | ILMN_1834317 | AW294430     | -0.404193601 | GOTERM_CC_FAT          | autophagic vacuole                                                       | 6     | 1.70E-02 | 9.20E-01  |
| ILMN_1684306 | S100A4    | 0.828034127 | GOTERM_BP_FAT          | positive regulation of signal transduction             | 59    | 1.00E-03 | 4.30E-02  | ILMN_3249608 | ANKL2        | -0.404204387 | PIR_SUPERFAMILY        | PIRSF005455:microtubule-associated proteins 1 light chain 3A/B3          | 3     | 9.30E-02 | 1.00E+00  |
| ILMN_2090105 | TAGLN2    | 0.827793534 | Enrichment Score: 4.32 |                                                        | Count | P-Value  | Benjamini | ILMN_1688242 | C5C13        | -0.40423357  | INTERPRO               | light chain 3 (LC3)                                                      | 3     | 1.60E-01 | 1.00E+00  |
| ILMN_1748001 | TMEM162   | 0.827748143 | GOTERM_BP_FAT          | vesicle-mediated transport                             | 125   | 1.10E-05 | 3.80E-03  | ILMN_1732819 | OSBP13       | -0.404235813 | Enrichment Score: 1.19 |                                                                          | Count | P-Value  | Benjamini |
| ILMN_3241979 | TMEM179B  | 0.827418143 | GOTERM_BP_FAT          | membrane organization                                  | 78    | 6.90E-05 | 4.90E-03  | ILMN_1793894 | NCIP3        | -0.404287803 | INTERPRO               | Glutathione S-transferase, alpha class                                   | 5     | 5.80E-04 | 2.70E-01  |
| ILMN_2064606 | TBC1D28   | 0.827258435 | GOTERM_BP_FAT          | endocytosis                                            | 50    | 1.30E-04 | 8.50E-03  | ILMN_1779051 | CYP2A7       | -0.404336237 | GOTERM_MF_FAT          | transferase activity, transferring alkyl or any other than methyl groups | 12    | 1.30E-02 | 6.40E-01  |
| ILMN_1676930 | CASKN1    | 0.826970028 | GOTERM_BP_FAT          | membrane invagination                                  | 50    | 1.30E-04 | 8.50E-03  | ILMN_1776283 | LAGL12       | -0.404347986 | INTERPRO               | Glutathione S-transferase, C-terminal                                    | 7     | 1.90E-02 | 9.80E-01  |
| ILMN_2416133 | GOR3      | 0.826932863 | SP_PIR_KEYWORDS        | endocytosis                                            | 20    | 1.90E-04 | 1.60E-01  | ILMN_1680879 | HIST1H3ZB2B  | -0.404353208 | PIR_SUPERFAMILY        | glutathione transferase                                                  | 4     | 4.30E-02 | 1.00E+00  |
| ILMN_2409887 | AMARC03   | 0.826251666 | Enrichment Score: 4.23 |                                                        | Count | P-Value  | Benjamini | ILMN_3235711 | CCDC648      | -0.404377561 | GOTERM_MF_FAT          | glutathione transferase activity                                         | 6     | 5.50E-02 | 7.70E-01  |
| ILMN_1800354 | CT3       | 0.825786839 | GOTERM_MF_FAT          | transcription factor binding                           | 111   | 2.40E-08 | 7.80E-06  | ILMN_1695587 | SALL4        | -0.404364607 | UP_SEQ_FEATURE         | domain:GST N-terminal                                                    | 6     | 6.20E-02 | 1.00E+00  |
| ILMN_1787109 | CLK2      | 0.82575294  | GOTERM_MF_FAT          | transcription activator activity                       | 78    | 3.40E-04 | 3.70E-02  | ILMN_1796627 | PKG          | -0.40463093  | INTERPRO               | Glutathione S-transferase, N-terminal                                    | 6     | 6.20E-02 | 1.00E+00  |
| ILMN_2382431 | ANKRD36   | 0.824841327 | GOTERM_MF_FAT          | transcription coactivator activity                     | 70    | 4.80E-04 | 4.40E-02  | ILMN_1766830 | RELT         | -0.404642882 | INTERPRO               | Glutathione S-transferase, C-terminal-like                               | 7     | 8.00E-02 | 1.00E+00  |
| ILMN_1808310 | RBP1      | 0.824545261 | GOTERM_MF_FAT          | transcription coactivator activity                     | 43    | 3.10E-03 | 1.40E-01  | ILMN_1769912 | ORH414       | -0.404665497 | INTERPRO               | Glutathione S-transferase/chloride channel, C-terminal                   | 7     | 9.10E-02 | 1.00E+00  |
| ILMN_1812325 | RNF19A    | 0.824393364 | Enrichment Score: 4.18 |                                                        | Count | P-Value  | Benjamini | ILMN_1738456 | HSP901       | -0.404668926 | UP_SEQ_FEATURE         | domain:GST C-terminal                                                    | 7     | 1.30E-01 | 1.00E+00  |
| ILMN_2157579 | NBP1      | 0.824038549 | GOTERM_BP_FAT          | positive regulation of cell death                      | 91    | 6.60E-06 | 7.90E-04  | ILMN_1699767 | PDE8A        | -0.404714577 | KEGG_PATHWAY           | Glutathione metabolism                                                   | 9     | 9.90E-01 | 9.40E-01  |
| ILMN_1809750 | HTFM3     | 0.823656128 | GOTERM_BP_FAT          | positive regulation of apoptosis                       | 90    | 7.30E-06 | 8.40E-04  | ILMN_1674587 | TBC1D3C      | -0.404749011 | KEGG_PATHWAY           | Metabolism of xenobiotics by cytochrome P450                             | 9     | 3.50E-01 | 9.50E-01  |
| ILMN_2115663 | CD320     | 0.823505643 | GOTERM_BP_FAT          | regulation of apoptosis                                | 149   | 9.80E-06 | 1.00E-03  | ILMN_1762531 | FGF9         | -0.404889305 | KEGG_PATHWAY           | Drug metabolism                                                          | 9     | 3.90E-01 | 9.60E-01  |
| ILMN_1718769 | ITSN1     | 0.823342308 | GOTERM_BP_FAT          | positive regulation of programmed cell death           | 90    | 9.80E-06 | 1.00E-03  | ILMN_1900657 | BM678241     | -0.404905405 | INTERPRO               | Thioredoxin fold                                                         | 12    | 5.10E-01 | 1.00E+00  |
| ILMN_1685088 | RLP36     | 0.823301945 | GOTERM_BP_FAT          | regulation of cell death                               | 150   | 1.30E-05 | 1.30E-03  | ILMN_3263330 | KDS181928    | -0.405004409 | Enrichment Score: 1.19 |                                                                          | Count | P-Value  | Benjamini |
| ILMN_1693780 | PCB2      | 0.823261806 | GOTERM_BP_FAT          | regulation of programmed cell death                    | 149   | 1.30E-05 | 1.30E-03  | ILMN_1767101 | CD58         | -0.405014639 | GOTERM_BP_FAT          | carboxylic acid biosynthetic process                                     | 24    | 6.30E-02 | 9.00E-01  |
| ILMN_1732656 | CAR       | 0.823016189 | GOTERM_BP_FAT          | induction of apoptosis                                 | 69    | 6.00E-05 | 2.90E-03  | ILMN_2150187 | DCST18       | -0.405032765 | GOTERM_BP_FAT          | organic acid biosynthetic process                                        | 24    | 2.10E-02 | 9.80E-01  |
| ILMN_1765021 | TOP3B     | 0.822718182 | GOTERM_BP_FAT          | induction of programmed cell death                     | 69    | 4.00E-05 | 3.10E-03  | ILMN_1808674 | CPN1         | -0.405036699 | GOTERM_BP_FAT          | fatty acid biosynthetic process                                          | 14    | 7.10E-02 | 9.80E-01  |
| ILMN_1652825 | IL10RA    | 0.822561758 | GOTERM_BP_FAT          | induction of apoptosis by extracellular signals        | 31    | 8.80E-06 | 6.00E-03  | ILMN_1786936 | BM919382     | -0.405215564 | Enrichment Score: 1.17 |                                                                          | Count | P-Value  | Benjamini |
| ILMN_1768823 | ICAM2     | 0.822132806 | GOTERM_BP_FAT          | negative regulation of apoptosis                       | 71    | 2.80E-04 | 1.60E-02  | ILMN_3308661 | MIR525       | -0.405220568 | SP_PIR_KEYWORDS        | Tyrosine-protein kinase                                                  | 22    | 5.20E-03 | 2.40E-01  |
| ILMN_2200562 | LOC959101 | 0.821510358 | GOTERM_BP_FAT          | negative regulation of programmed cell death           | 71    | 4.90E-04 | 2.30E-02  | ILMN_1728816 | SYT9         | -0.405235374 | INTERPRO               | tyrosine-protein kinase, active-site                                     | 18    | 2.60E-02 | 9.90E-01  |
| ILMN_1680704 | SR4       | 0.821397144 | GOTERM_BP_FAT          | negative regulation of cell death                      | 71    | 4.90E-04 | 2.30E-02  | ILMN_2136607 | NUT          | -0.405236086 | GOTERM_MF_FAT          | tyrosine-protein kinase activity                                         | 27    | 3.00E-02 | 9.80E-01  |
| ILMN_1680953 | CD81      | 0.820970821 | GOTERM_BP_FAT          | anti-apoptosis                                         | 36    | 6.80E-02 | 5.80E-01  | ILMN_1712754 | NFKB1B       | -0.405253738 | SMART                  | Tyrosic                                                                  | 19    | 4.20E-02 | 9.80E-01  |
| ILMN_1761912 | MGA1      | 0.820751551 | Enrichment Score: 4.17 |                                                        | Count | P-Value  | Benjamini | ILMN_1797794 | AK126307     | -0.405264157 | GOTERM_MF_FAT          | non-membrane spanning protein tyrosine kinase activity                   | 9     | 6.60E-02 | 8.80E-01  |
| ILMN_1683576 | MAGED2    | 0.81984923  | GOTERM_BP_FAT          | protein localization                                   | 167   | 6.60E-07 | 2.50E-04  | ILMN_1706558 | TRMT61B      | -0.405281547 | INTERPRO               | Tyrosine-protein kinase                                                  | 19    | 7.20E-02 | 1.00E+00  |
| ILMN_2367707 | PKN1      | 0.818771419 | GOTERM_BP_FAT          | intracellular transport                                | 131   | 8.00E-07 | 2.40E-04  | ILMN_1665795 | CPA6         | -0.405305236 | INTERPRO               | Protein kinase, cAMP                                                     | 61    | 8.90E-02 | 1.00E+00  |
| ILMN_1727721 | WARS      | 0.8185949   | SP_PIR_KEYWORDS        | protein transport                                      | 95    | 1.30E-06 | 5.90E-05  | ILMN_1705637 | ACR          | -0.405319831 | SP_PIR_KEYWORDS        | tyrosine-specific protein kinase                                         | 9     | 1.20E-01 | 8.40E-01  |
| ILMN_1720124 | KCC2      | 0.817782509 | GOTERM_BP_FAT          | protein transport                                      | 145   | 3.00E-06 | 4.20E-04  | ILMN_1715507 | CHMP4A       | -0.405414093 | INTERPRO               | tyrosine kinase, ATP binding site                                        | 134   | 6.70E-02 | 1.00E+00  |
| ILMN_2368068 | TCF20     | 0.817516324 | GOTERM_BP_FAT          | establishment of protein localization                  | 146   | 3.10E-06 | 4.20E-04  | ILMN_1674341 | POTCE        | -0.405475228 | UP_SEQ_FEATURE         | domain:Protein kinase                                                    | 57    | 1.70E-01 | 1.00E+00  |
| ILMN_1760890 | SEPN1     | 0.817576064 | GOTERM_BP_FAT          | intracellular protein transport                        | 71    | 1.40E-03 | 4.90E-02  | ILMN_1749821 | MED28        | -0.405529566 | GOTERM_MF_FAT          | transmembrane receptor protein tyrosine kinase activity                  | 8     | 5.80E-01 | 1.00E+00  |
| ILMN_1712944 | AES       | 0.816642821 | GOTERM_BP_FAT          | cellular protein localization                          | 75    | 3.00E-03 | 8.40E-02  | ILMN_3242550 | CTS1P8       | -0.405576831 | Enrichment Score: 1.16 |                                                                          | Count | P-Value  | Benjamini |
| ILMN_1754121 | CSK       | 0.816591048 | GOTERM_BP_FAT          | cellular macromolecule localization                    | 75    | 3.60E-03 | 9.70E-02  | ILMN_1722533 | KATNAL1      | -0.405617811 | GOTERM_MF_FAT          | lipid acid binding                                                       | 4     | 3.10E-02 | 8.20E-01  |
| ILMN_2092756 | TWFRM1D9  | 0.816243364 | SP_PIR_KEYWORDS        | transport                                              | 212   | 2.30E-01 | 6.70E-01  | ILMN_1728798 | TERF42       | -0.405717756 | SP_PIR_KEYWORDS        | lipid acid                                                               | 3     | 8.80E-02 | 8.60E-01  |
| ILMN_2154953 | STX8P2    | 0.816163257 | Enrichment Score: 4.13 |                                                        | Count | P-Value  | Benjamini | ILMN_169310  |              |              |                        |                                                                          |       |          |           |

| Gene         | Enrichment Score | Count        | P-Value | Benjamini | Gene         | Enrichment Score | Count        | P-Value | Benjamini |
|--------------|------------------|--------------|---------|-----------|--------------|------------------|--------------|---------|-----------|
| ILMN_2350266 | FBXO46           | 0.809012563  |         |           | ILMN_1732468 | HSPA4L           | -0.407005857 |         |           |
| ILMN_1662799 | GPSM3            | 0.808974076  |         |           | ILMN_1725833 | IFITD1           | -0.407019599 |         |           |
| ILMN_1073357 | SLA2             | 0.808936701  |         |           | ILMN_2388585 | GOPC             | -0.407049292 |         |           |
| ILMN_1735180 | KCSTN            | 0.808884231  |         |           | ILMN_2371212 | NA               | -0.407053001 |         |           |
| ILMN_1814789 | UBAP2L           | 0.808865874  |         |           | ILMN_3381507 | FLJ39609         | -0.407059047 |         |           |
| ILMN_1759700 | NLGN3            | 0.808828349  |         |           | ILMN_1652963 | C1orf194         | -0.407111688 |         |           |
| ILMN_3236904 | LOC484740        | 0.807906427  |         |           | ILMN_3229447 | NA               | -0.407150295 |         |           |
| ILMN_2109994 | MLA-RAB48        | 0.807572263  |         |           | ILMN_1760088 | CKORR            | -0.407153725 |         |           |
| ILMN_1801043 | GSN              | 0.807523537  |         |           | ILMN_1078502 | BCI71856         | -0.407198651 |         |           |
| ILMN_2397894 | SPSP             | 0.807392021  |         |           | ILMN_1824133 | SEPRN1           | -0.407203191 |         |           |
| ILMN_1715760 | HUAT             | 0.807291519  |         |           | ILMN_1731878 | ENDPH1           | -0.407234313 |         |           |
| ILMN_2103362 | ARHGAP27         | 0.806776335  |         |           | ILMN_1690984 | FGF13            | -0.407327647 |         |           |
| ILMN_3238633 | SDHA5            | 0.806667048  |         |           | ILMN_2269136 | AGAP3            | -0.407347742 |         |           |
| ILMN_1705750 | TGM2             | 0.806331049  |         |           | ILMN_1805756 | POU6F1           | -0.407359125 |         |           |
| ILMN_2333107 | AIE2             | 0.806240321  |         |           | ILMN_2389590 | PKRARI1          | -0.407405283 |         |           |
| ILMN_1741148 | ALDOA            | 0.806239454  |         |           | ILMN_1787586 | AKO92424         | -0.407418691 |         |           |
| ILMN_2376204 | LTB              | 0.806235045  |         |           | ILMN_1652959 | ABCD2            | -0.407424713 |         |           |
| ILMN_3275345 | RPS27            | 0.805077537  |         |           | ILMN_1657959 | AV227114         | -0.407469618 |         |           |
| ILMN_2406039 | EF1D1            | 0.804486489  |         |           | ILMN_2179915 | ARHGFB3          | -0.407487438 |         |           |
| ILMN_2379592 | SPN11            | 0.804384209  |         |           | ILMN_1725031 | LHPF1            | -0.407498053 |         |           |
| ILMN_1666361 | SLC23A2          | 0.804202607  |         |           | ILMN_1912334 | HYDN             | -0.407511711 |         |           |
| ILMN_1770454 | AGRN             | 0.803885719  |         |           | ILMN_1888195 | BM975708         | -0.407521396 |         |           |
| ILMN_1699558 | AP2M1            | 0.803789511  |         |           | ILMN_1844068 | AAB13722         | -0.407569769 |         |           |
| ILMN_1709549 | PLEKHM1          | 0.803771165  |         |           | ILMN_1788349 | TMEM202          | -0.407577832 |         |           |
| ILMN_2125747 | CORO1A           | 0.803651999  |         |           | ILMN_2352609 | OGG1             | -0.407604957 |         |           |
| ILMN_2119648 | SPENC2           | 0.803629824  |         |           | ILMN_2186137 | CEKOR8090        | -0.407637960 |         |           |
| ILMN_1737885 | DMPA1            | 0.803425398  |         |           | ILMN_2285592 | CDK11X1          | -0.407729278 |         |           |
| ILMN_1792528 | RPS25            | 0.803403660  |         |           | ILMN_3257004 | AK124173         | -0.407766368 |         |           |
| ILMN_2103841 | AIP              | 0.803367166  |         |           | ILMN_2281830 | MSRA             | -0.407778609 |         |           |
| ILMN_2396444 | CD14             | 0.803001296  |         |           | ILMN_1808404 | RHDF1            | -0.407780808 |         |           |
| ILMN_2116366 | PLI2             | 0.802712608  |         |           | ILMN_3252969 | LOC100128300     | -0.407784387 |         |           |
| ILMN_1724052 | ECDC1            | 0.802294956  |         |           | ILMN_1895225 | AAT79998         | -0.407823822 |         |           |
| ILMN_3246310 | RPS18            | 0.801900001  |         |           | ILMN_1301511 | ARHG6162         | -0.407835417 |         |           |
| ILMN_2372974 | SIRPA            | 0.801909314  |         |           | ILMN_1815238 | MAP2K3           | -0.407841949 |         |           |
| ILMN_2272074 | TROVE2           | 0.801859722  |         |           | ILMN_1805826 | BIVM             | -0.407850446 |         |           |
| ILMN_2388507 | AKT1             | 0.80165812   |         |           | ILMN_1676625 | SS18L1           | -0.407899207 |         |           |
| ILMN_2400555 | CHK30            | 0.801562828  |         |           | ILMN_1631382 | PMS2L13          | -0.407937469 |         |           |
| ILMN_2400798 | CTCF9            | 0.801495862  |         |           | ILMN_3200482 | PCSK2            | -0.407963796 |         |           |
| ILMN_2402798 | AP2M1            | 0.801281577  |         |           | ILMN_1786982 | PAR2             | -0.407987923 |         |           |
| ILMN_3225761 | RPS14            | 0.800974772  |         |           | ILMN_1835451 | BX097896         | -0.408059017 |         |           |
| ILMN_1715926 | RP132            | 0.800938561  |         |           | ILMN_2358733 | TAZ              | -0.408073665 |         |           |
| ILMN_1731790 | PPP6B            | 0.800856118  |         |           | ILMN_3304977 | SP140A5          | -0.408087101 |         |           |
| ILMN_1791447 | CKX12            | 0.800532308  |         |           | ILMN_1803018 | KIFC2            | -0.408087412 |         |           |
| ILMN_1803988 | MCL1             | 0.800442675  |         |           | ILMN_2367743 | TURB1            | -0.408120759 |         |           |
| ILMN_1671291 | E1F3             | 0.800439881  |         |           | ILMN_2234605 | AGRN             | -0.408132158 |         |           |
| ILMN_1777342 | PRES1            | 0.800420607  |         |           | ILMN_1788400 | KIAA2022         | -0.408179235 |         |           |
| ILMN_1768595 | DLG4             | 0.800230691  |         |           | ILMN_2283245 | C9orf94          | -0.408231909 |         |           |
| ILMN_1809484 | TMO03            | 0.800285794  |         |           | ILMN_1665365 | MATR3            | -0.408239832 |         |           |
| ILMN_2053178 | ACTG1            | 0.799847542  |         |           | ILMN_1672582 | XAGE1A           | -0.408251276 |         |           |
| ILMN_1768505 | IL13RA1          | 0.799728713  |         |           | ILMN_2072568 | CLDN8            | -0.408302394 |         |           |
| ILMN_1746397 | DSB25289         | 0.799551618  |         |           | ILMN_3305554 | SP140L           | -0.408316213 |         |           |
| ILMN_1666385 | CALM3            | 0.799447958  |         |           | ILMN_2404516 | PCDH3C3          | -0.408330171 |         |           |
| ILMN_1695404 | LYVE1            | 0.799441874  |         |           | ILMN_1821915 | BM683706         | -0.408346941 |         |           |
| ILMN_3281563 | RP12             | 0.799040773  |         |           | ILMN_1668927 | Cxor42           | -0.408438586 |         |           |
| ILMN_1769702 | GPA1             | 0.798983762  |         |           | ILMN_1656949 | SFN1A            | -0.408458805 |         |           |
| ILMN_1701655 | SLC24A6          | 0.798848798  |         |           | ILMN_1730551 | TEX19            | -0.408577797 |         |           |
| ILMN_2411963 | RBM39            | 0.79851727   |         |           | ILMN_3346388 | MSD14            | -0.408576597 |         |           |
| ILMN_1669727 | WAC              | 0.797953256  |         |           | ILMN_1818451 | CD515724         | -0.408628143 |         |           |
| ILMN_2218277 | RPS2             | 0.797791526  |         |           | ILMN_1710619 | C17orf73         | -0.408628168 |         |           |
| ILMN_1719303 | PAH8             | 0.797743734  |         |           | ILMN_2085659 | OTOG1            | -0.408641693 |         |           |
| ILMN_1662166 | PI7K             | 0.797561568  |         |           | ILMN_1759979 | ZNF91            | -0.408650877 |         |           |
| ILMN_2247594 | RP191            | 0.797244996  |         |           | ILMN_2047240 | ARSA             | -0.408707673 |         |           |
| ILMN_1761959 | DPEL2            | 0.797214682  |         |           | ILMN_1710204 | TNFRSF4          | -0.408712908 |         |           |
| ILMN_2386530 | RLP1             | 0.796900533  |         |           | ILMN_1829919 | NA               | -0.408724929 |         |           |
| ILMN_1781276 | TMO04            | 0.796834571  |         |           | ILMN_1855566 | BRD7             | -0.408785939 |         |           |
| ILMN_1724994 | COL4A2           | 0.796809999  |         |           | ILMN_1662738 | ACSM3            | -0.408798282 |         |           |
| ILMN_2080342 | LGALS9C          | 0.796661258  |         |           | ILMN_2083137 | LOC284379        | -0.408802917 |         |           |
| ILMN_1754195 | RP131            | 0.796429946  |         |           | ILMN_1722127 | RAD5B            | -0.408840813 |         |           |
| ILMN_2062120 | RP110            | 0.796213020  |         |           | ILMN_1703131 | SPANK6           | -0.408902955 |         |           |
| ILMN_3176090 | RCC2             | 0.796147666  |         |           | ILMN_1885165 | AB072895         | -0.408911619 |         |           |
| ILMN_2352302 | PI7K             | 0.796076585  |         |           | ILMN_1807515 | CSTF2            | -0.408968392 |         |           |
| ILMN_1713086 | RP127A           | 0.795803754  |         |           | ILMN_1797893 | NAB2P12          | -0.409023885 |         |           |
| ILMN_2166819 | RPS27            | 0.795556894  |         |           | ILMN_1729645 | BB3              | -0.409061858 |         |           |
| ILMN_2398787 | ARHGAP17         | 0.795413615  |         |           | ILMN_1784604 | LOC283710        | -0.409078951 |         |           |
| ILMN_1813921 | CSPR1            | 0.794999755  |         |           | ILMN_1681402 | FL38379          | -0.409124333 |         |           |
| ILMN_1707336 | ARPC4            | 0.794946569  |         |           | ILMN_2371147 | BCL7C            | -0.409138884 |         |           |
| ILMN_3198900 | FAM2018          | 0.794946164  |         |           | ILMN_3182885 | LOC100130542     | -0.409153135 |         |           |
| ILMN_1783771 | UBE2Z            | 0.794821422  |         |           | ILMN_1777031 | PKLR             | -0.409188448 |         |           |
| ILMN_2412214 | HUAT             | 0.794776221  |         |           | ILMN_1703470 | TBX20            | -0.409194416 |         |           |
| ILMN_1737869 | SLX4             | 0.794413265  |         |           | ILMN_1708010 | HSP90A1          | -0.409213465 |         |           |
| ILMN_1696839 | RPS27            | 0.794203065  |         |           | ILMN_1730369 | GOGGAL1          | -0.409241863 |         |           |
| ILMN_1670305 | SERPING1         | 0.794188549  |         |           | ILMN_1705201 | FOXK2            | -0.409330505 |         |           |
| ILMN_1802106 | AP0BC3G          | 0.794033059  |         |           | ILMN_2313467 | GNAI1            | -0.409332907 |         |           |
| ILMN_3266186 | HDC47            | 0.793622899  |         |           | ILMN_2232561 | CRHP8            | -0.409357068 |         |           |
| ILMN_3296380 | XRC6C            | 0.793536046  |         |           | ILMN_1639327 | SNORD83A         | -0.409370719 |         |           |
| ILMN_1712396 | SOX6             | 0.793309919  |         |           | ILMN_1669034 | TNFRK2           | -0.409404802 |         |           |
| ILMN_1727117 | ASC3             | 0.793011011  |         |           | ILMN_2315665 | PANX3            | -0.409446077 |         |           |
| ILMN_1770742 | TMEM55B          | 0.792839673  |         |           | ILMN_1707649 | MPDZ             | -0.409503458 |         |           |
| ILMN_1746516 | RPS25            | 0.792595871  |         |           | ILMN_2359835 | SFTPB            | -0.409594714 |         |           |
| ILMN_2061043 | CD48             | 0.792338043  |         |           | ILMN_3310075 | MIR1297          | -0.409630151 |         |           |
| ILMN_1656868 | MHP13            | 0.792295858  |         |           | ILMN_1808873 | ChrO110          | -0.409667062 |         |           |
| ILMN_1789588 | CD9E63           | 0.792115614  |         |           | ILMN_1808234 | NCRN00887        | -0.409711066 |         |           |
| ILMN_1705464 | MKL41            | 0.792059856  |         |           | ILMN_1768202 | ANKRD24          | -0.409739022 |         |           |
| ILMN_1654289 | EK1              | 0.791938088  |         |           | ILMN_3245360 | FAM2018          | -0.409760466 |         |           |
| ILMN_1732468 | HSPA4L           | -0.407005857 |         |           | ILMN_2269136 | AGAP3            | -0.407347742 |         |           |
| ILMN_1725833 | IFITD1           | -0.407019599 |         |           | ILMN_1805756 | POU6F1           | -0.407359125 |         |           |
| ILMN_2388585 | GOPC             | -0.407049292 |         |           | ILMN_2389590 | PKRARI1          | -0.407405283 |         |           |
| ILMN_2371212 | NA               | -0.407053001 |         |           | ILMN_1787586 | AKO92424         | -0.407418691 |         |           |
| ILMN_3381507 | FLJ39609         | -0.407059047 |         |           | ILMN_1652959 | ABCD2            | -0.407424713 |         |           |
| ILMN_1652963 | C1orf194         | -0.407111688 |         |           | ILMN_1657959 | AV227114         | -0.407469618 |         |           |
| ILMN_3229447 | NA               | -0.407150295 |         |           | ILMN_2179915 | ARHGFB3          | -0.407487438 |         |           |
| ILMN_1760088 | CKORR            | -0.407153725 |         |           | ILMN_1725031 | LHPF1            | -0.407498053 |         |           |
| ILMN_1078502 | BCI71856         | -0.407198651 |         |           | ILMN_1912334 | HYDN             | -0.407511711 |         |           |
| ILMN_2397894 | SPSP             | -0.407203191 |         |           | ILMN_1888195 | BM975708         | -0.407521396 |         |           |
| ILMN_1731878 | ENDPH1           | -0.407234313 |         |           | ILMN_1844068 | AAB13722         | -0.407569769 |         |           |
| ILMN_1690984 | FGF13            | -0.407327647 |         |           | ILMN_1788349 | TMEM202          | -0.407577832 |         |           |
| ILMN_2269136 | AGAP3            | -0.407347742 |         |           | ILMN_2352609 | OGG1             | -0.407604957 |         |           |
| ILMN_1805756 | POU6F1           | -0.407359125 |         |           | ILMN_2186137 | CEKOR8090        | -0.407637960 |         |           |
| ILMN_2389590 | PKRARI1          | -0.407405283 |         |           | ILMN_2285592 | CDK11X1          | -0.40772     |         |           |

| Gene                   | Annotation                                                                                                        | Category     | Count    | P Value  | Benjamini |
|------------------------|-------------------------------------------------------------------------------------------------------------------|--------------|----------|----------|-----------|
| ILMN_2121417           | PGAM1                                                                                                             | 0.79189701   |          |          |           |
| ILMN_2338785           | RP514                                                                                                             | 0.791880494  |          |          |           |
| ILMN_1655935           | ADCY7                                                                                                             | 0.791767264  |          |          |           |
| ILMN_2064655           | Ctcf404                                                                                                           | 0.791709416  |          |          |           |
| ILMN_1764840           | VGLL4                                                                                                             | 0.79171577   |          |          |           |
| ILMN_2160005           | NUMA1                                                                                                             | 0.791697747  |          |          |           |
| ILMN_2389013           | ADRM1                                                                                                             | 0.791673178  |          |          |           |
| ILMN_1789599           | Ctcf151                                                                                                           | 0.79127954   |          |          |           |
| ILMN_1688780           | S100A4                                                                                                            | 0.791254338  |          |          |           |
| ILMN_2315206           | SMN1                                                                                                              | 0.791203241  |          |          |           |
| ILMN_1843949           | BKX648950                                                                                                         | 0.79101887   |          |          |           |
| ILMN_1749447           | RP59                                                                                                              | 0.791023843  |          |          |           |
| ILMN_1758315           | SLC9A9                                                                                                            | 0.790913175  |          |          |           |
| ILMN_1736481           | SEC5BP2                                                                                                           | 0.790882054  |          |          |           |
| ILMN_1664099           | GUS3                                                                                                              | 0.790834381  |          |          |           |
| ILMN_1773964           | HIF1                                                                                                              | 0.790453314  |          |          |           |
| ILMN_1691165           | CLSPN                                                                                                             | 0.790365162  |          |          |           |
| ILMN_1764721           | RPL8                                                                                                              | 0.790283503  |          |          |           |
| ILMN_1767256           | MBTPS1                                                                                                            | 0.790115347  |          |          |           |
| ILMN_2106331           | H3F3A                                                                                                             | 0.789967611  |          |          |           |
| ILMN_1749372           | GGT5                                                                                                              | 0.789946841  |          |          |           |
| ILMN_2210561           | B3GAT3                                                                                                            | 0.789941542  |          |          |           |
| ILMN_1776464           | PARP4                                                                                                             | 0.78953482   |          |          |           |
| ILMN_2133360           | RP52                                                                                                              | 0.789516596  |          |          |           |
| ILMN_1661917           | RPL10                                                                                                             | 0.789486302  |          |          |           |
| ILMN_1669424           | YX1C1                                                                                                             | 0.789406382  |          |          |           |
| ILMN_1786900           | TNRC25                                                                                                            | 0.789366477  |          |          |           |
| ILMN_1653469           | RPL12                                                                                                             | 0.789199249  |          |          |           |
| ILMN_2366634           | PKM2                                                                                                              | 0.789174473  |          |          |           |
| ILMN_1744604           | CYBA                                                                                                              | 0.788946337  |          |          |           |
| ILMN_2322972           | ZFYVE27                                                                                                           | 0.788844389  |          |          |           |
| ILMN_1779010           | MAP3K3                                                                                                            | 0.788813762  |          |          |           |
| ILMN_1760058           | TM6SF2                                                                                                            | 0.788809271  |          |          |           |
| ILMN_1663204           | PSMG4                                                                                                             | 0.787966723  |          |          |           |
| ILMN_1668748           | MDG5                                                                                                              | 0.787745868  |          |          |           |
| ILMN_2388701           | ST3GALS1                                                                                                          | 0.787653518  |          |          |           |
| ILMN_1746257           | DAZAP1                                                                                                            | 0.787453647  |          |          |           |
| ILMN_2323177           | ACTN1                                                                                                             | 0.787426614  |          |          |           |
| ILMN_1721649           | TNFRN1                                                                                                            | 0.787392971  |          |          |           |
| ILMN_2393254           | CAPN5                                                                                                             | 0.787318113  |          |          |           |
| ILMN_1781626           | C15                                                                                                               | 0.787303856  |          |          |           |
| ILMN_2393144           | ARL6IP4                                                                                                           | 0.787242066  |          |          |           |
| ILMN_23199798          | RPL10                                                                                                             | 0.78720251   |          |          |           |
| ILMN_2527771           | RPL18A                                                                                                            | 0.787103171  |          |          |           |
| ILMN_1784790           | RP510                                                                                                             | 0.787086861  |          |          |           |
| ILMN_1805448           | EPH4L2                                                                                                            | 0.787047333  |          |          |           |
| ILMN_1756146           | WDKAS                                                                                                             | 0.786862934  |          |          |           |
| ILMN_1725366           | SLC27A5                                                                                                           | 0.786836809  |          |          |           |
| ILMN_1768470           | EIF4G1                                                                                                            | 0.786670408  |          |          |           |
| ILMN_1658106           | HMM1568                                                                                                           | 0.786582591  |          |          |           |
| ILMN_2165590           | RRC5                                                                                                              | 0.786393211  |          |          |           |
| ILMN_2342970           | POLK2I2                                                                                                           | 0.786362849  |          |          |           |
| ILMN_1756204           | RP56KA4                                                                                                           | 0.78621872   |          |          |           |
| ILMN_1802089           | SYMPK                                                                                                             | 0.78581435   |          |          |           |
| ILMN_1695261           | RPL10                                                                                                             | 0.785808679  |          |          |           |
| ILMN_1701854           | GNG5                                                                                                              | 0.785772334  |          |          |           |
| ILMN_1734205           | RASSF1                                                                                                            | 0.785551359  |          |          |           |
| ILMN_2124769           | YX1C1                                                                                                             | 0.785561291  |          |          |           |
| ILMN_2241452           | RPL18A                                                                                                            | 0.785517593  |          |          |           |
| ILMN_2348247           | LOC349114                                                                                                         | 0.785437791  |          |          |           |
| ILMN_1770247           | HOKA10-HOKA9                                                                                                      | 0.78541072   |          |          |           |
| ILMN_2207163           | RABAC1                                                                                                            | 0.785279134  |          |          |           |
| ILMN_1779185           | SPECC1L                                                                                                           | 0.785021591  |          |          |           |
| ILMN_2337241           | RP515A                                                                                                            | 0.784954606  |          |          |           |
| ILMN_2144444           | RPL18A                                                                                                            | 0.784202608  |          |          |           |
| ILMN_1804476           | GMPA9                                                                                                             | 0.784199465  |          |          |           |
| ILMN_1682938           | ARF3                                                                                                              | 0.783963454  |          |          |           |
| ILMN_2410909           | ACT1                                                                                                              | 0.783637457  |          |          |           |
| ILMN_1774801           | HLA-B                                                                                                             | 0.7835488956 |          |          |           |
| ILMN_2402930           | H3F3A                                                                                                             | 0.783554548  |          |          |           |
| ILMN_3273641           | ATFB                                                                                                              | 0.783470309  |          |          |           |
| ILMN_1782543           | EEF1D                                                                                                             | 0.783396987  |          |          |           |
| ILMN_2364073           | RP527                                                                                                             | 0.783232659  |          |          |           |
| ILMN_3307849           | PRR14L                                                                                                            | 0.783229614  |          |          |           |
| ILMN_1806257           | MYBBP1A                                                                                                           | 0.783039361  |          |          |           |
| ILMN_1658472           | APH1A                                                                                                             | 0.782749522  |          |          |           |
| ILMN_1802456           | DOCTD                                                                                                             | 0.782597135  |          |          |           |
| ILMN_1715804           | PITPNP                                                                                                            | 0.782564606  |          |          |           |
| ILMN_2275803           | LRRCS4                                                                                                            | 0.782404421  |          |          |           |
| ILMN_1815682           | Ctcf97                                                                                                            | 0.782324286  |          |          |           |
| ILMN_3211712           | RP52                                                                                                              | 0.782242413  |          |          |           |
| ILMN_1691487           | TRAF2                                                                                                             | 0.78212567   |          |          |           |
| ILMN_1802627           | PSMG3                                                                                                             | 0.782060602  |          |          |           |
| ILMN_3220792           | RPL13AP5                                                                                                          | 0.781908832  |          |          |           |
| ILMN_1666981           | RP527                                                                                                             | 0.781894082  |          |          |           |
| ILMN_1775724           | SH2D3C                                                                                                            | 0.781858583  |          |          |           |
| ILMN_1671494           | USP5                                                                                                              | 0.781625672  |          |          |           |
| ILMN_1742330           | PKNB1                                                                                                             | 0.781413669  |          |          |           |
| ILMN_2402341           | MAPK3                                                                                                             | 0.781178848  |          |          |           |
| ILMN_1754033           | RPL30                                                                                                             | 0.780884172  |          |          |           |
| ILMN_1782621           | RP512                                                                                                             | 0.780762002  |          |          |           |
| ILMN_1758895           | CTSK                                                                                                              | 0.780723974  |          |          |           |
| ILMN_1751789           | RP59                                                                                                              | 0.780723974  |          |          |           |
| ILMN_1709444           | TGIF2                                                                                                             | 0.780626798  |          |          |           |
| ILMN_1786195           | PRKCA                                                                                                             | 0.780591669  |          |          |           |
| GOTERM_BP_FAT          | rRNA metabolic process                                                                                            | 21           | 2.40E-02 | 3.30E-01 |           |
| GOTERM_BP_FAT          | rDNA processing                                                                                                   | 34           | 4.80E-02 | 4.90E-01 |           |
| SP_PIR_KEYWORDS        | rna processing                                                                                                    | 7            | 7.60E-01 | 9.80E-01 |           |
| Enrichment Score: 2.2  |                                                                                                                   |              |          |          |           |
| Count                  |                                                                                                                   |              |          |          |           |
| SP_PIR_KEYWORDS        | aphosporus metabolic process                                                                                      | 50           | 8.90E-07 | 3.30E-05 |           |
| GOTERM_MF_FAT          | nucleotide binding                                                                                                | 346          | 7.60E-05 | 1.20E-02 |           |
| SP_PIR_KEYWORDS        | nucleotide binding                                                                                                | 253          | 1.10E-04 | 2.40E-03 |           |
| SP_PIR_KEYWORDS        | utp-binding                                                                                                       | 203          | 1.90E-04 | 3.60E-03 |           |
| SP_PIR_KEYWORDS        | ubiquitin                                                                                                         | 114          | 3.30E-04 | 5.90E-03 |           |
| GOTERM_MF_FAT          | uracil ribonucleotide binding                                                                                     | 279          | 1.10E-03 | 9.30E-02 |           |
| GOTERM_MF_FAT          | ATP binding                                                                                                       | 229          | 1.20E-03 | 9.10E-02 |           |
| GOTERM_MF_FAT          | adenyl ribonucleotide binding                                                                                     | 230          | 1.90E-03 | 1.20E-01 |           |
| GOTERM_MF_FAT          | uracil nucleotide binding                                                                                         | 286          | 2.80E-03 | 1.30E-01 |           |
| GOTERM_MF_FAT          | adenyl nucleotide binding                                                                                         | 237          | 4.80E-03 | 1.80E-01 |           |
| GOTERM_MF_FAT          | nucleotide binding                                                                                                | 240          | 5.30E-03 | 1.80E-01 |           |
| GOTERM_MF_FAT          | protein kinase activity                                                                                           | 101          | 5.90E-03 | 1.90E-01 |           |
| UP_SEQ_FEATURE         | binding site:ATP                                                                                                  | 86           | 7.70E-03 | 8.50E-01 |           |
| GOTERM_BP_FAT          | phosphorylation                                                                                                   | 130          | 7.00E-03 | 1.70E-01 |           |
| GOTERM_BP_FAT          | protein amino acid phosphorylation                                                                                | 109          | 1.30E-02 | 2.20E-01 |           |
| UP_SEQ_FEATURE         | domain:Protein kinase                                                                                             | 74           | 1.40E-02 | 9.40E-01 |           |
| GOTERM_MF_FAT          | protein serine/threonine kinase activity                                                                          | 72           | 1.50E-02 | 3.50E-01 |           |
| SP_PIR_KEYWORDS        | serine/threonine-binding region                                                                                   | 61           | 1.80E-02 | 1.50E-01 |           |
| UP_SEQ_FEATURE         | nucleotide phosphate-binding kinase:ATP                                                                           | 138          | 2.10E-02 | 9.70E-01 |           |
| SP_PIR_KEYWORDS        | transferase                                                                                                       | 191          | 3.40E-02 | 2.20E-01 |           |
| INTERPRO               | Protein kinase_core                                                                                               | 94           | 4.60E-02 | 3.10E-01 |           |
| GOTERM_BP_FAT          | aphosporus metabolic process                                                                                      | 146          | 5.90E-02 | 5.40E-01 |           |
| GOTERM_BP_FAT          | aphosporus metabolic process                                                                                      | 146          | 5.90E-02 | 5.40E-01 |           |
| INTERPRO               | Serine/threonine protein kinase, active site                                                                      | 55           | 8.00E-02 | 9.60E-01 |           |
| INTERPRO               | Protein kinase_ATP binding site                                                                                   | 68           | 9.90E-02 | 9.60E-01 |           |
| INTERPRO               | Serine/threonine protein kinase-related                                                                           | 54           | 1.30E-01 | 9.80E-01 |           |
| INTERPRO               | Serine/threonine protein kinase                                                                                   | 40           | 2.70E-01 | 5.00E-01 |           |
| UP_SEQ_FEATURE         | active site:Proton acceptor                                                                                       | 89           | 1.70E-01 | 1.00E+00 |           |
| SMART                  | S_Tc                                                                                                              | 40           | 2.10E-01 | 9.00E-01 |           |
| Enrichment Score: 2.15 |                                                                                                                   |              |          |          |           |
| Count                  |                                                                                                                   |              |          |          |           |
| GOTERM_BP_FAT          | DNA packaging                                                                                                     | 30           | 4.80E-04 | 2.40E-02 |           |
| SP_PIR_KEYWORDS        | chromatin                                                                                                         | 10           | 6.00E-04 | 1.00E-02 |           |
| REGulatory             | histone H2A                                                                                                       | 28           | 1.20E-03 | 4.10E-02 |           |
| GOTERM_BP_FAT          | chromatin assembly or disassembly                                                                                 | 30           | 1.90E-03 | 6.00E-02 |           |
| GOTERM_BP_FAT          | nucleosome assembly                                                                                               | 22           | 2.50E-03 | 7.20E-02 |           |
| GOTERM_BP_FAT          | chromatin assembly                                                                                                | 22           | 3.90E-03 | 1.00E-01 |           |
| GOTERM_CC_FAT          | histone H2A                                                                                                       | 41           | 5.30E-03 | 1.70E-02 |           |
| INTERPRO               | Histone core                                                                                                      | 8            | 6.40E-03 | 5.20E-01 |           |
| GOTERM_BP_FAT          | main:DNA complex assembly                                                                                         | 22           | 6.70E-03 | 2.50E-01 |           |
| SP_PIR_KEYWORDS        | chromosomal protein                                                                                               | 29           | 7.60E-03 | 7.90E-02 |           |
| SMART                  | H2A                                                                                                               | 8            | 8.10E-03 | 4.30E-01 |           |
| INTERPRO               | Histone core                                                                                                      | 13           | 8.30E-03 | 5.60E-01 |           |
| GOTERM_BP_FAT          | nucleosome organization                                                                                           | 22           | 8.70E-03 | 1.80E-01 |           |
| SP_PIR_KEYWORDS        | nucleosome core                                                                                                   | 13           | 9.40E-03 | 9.60E-02 |           |
| GOTERM_CC_FAT          | nucleosome                                                                                                        | 15           | 3.60E-02 | 2.80E-01 |           |
| PIR_SUPERFAMILY        | PIR002048-histone H2A                                                                                             | 6            | 4.20E-02 | 1.00E+00 |           |
| GOTERM_CC_FAT          | protein:DNA complex                                                                                               | 17           | 1.00E-01 | 5.00E-01 |           |
| INTERPRO               | Histone-fold                                                                                                      | 10           | 2.40E-01 | 1.00E+00 |           |
| Enrichment Score: 2.11 |                                                                                                                   |              |          |          |           |
| Count                  |                                                                                                                   |              |          |          |           |
| SP_PIR_KEYWORDS        | nucleosome core                                                                                                   | 36           | 2.70E-04 | 5.00E-03 |           |
| UP_SEQ_FEATURE         | domain:Rho-GAP                                                                                                    | 16           | 9.60E-03 | 9.10E-01 |           |
| INTERPRO               | RhoGAP2                                                                                                           | 16           | 1.80E-02 | 7.90E-01 |           |
| GOTERM_MF_FAT          | GTPase activator activity                                                                                         | 40           | 2.20E-02 | 4.10E-01 |           |
| SMART                  | RhoGAP                                                                                                            | 16           | 2.60E-02 | 5.90E-01 |           |
| Enrichment Score: 2.1  |                                                                                                                   |              |          |          |           |
| Count                  |                                                                                                                   |              |          |          |           |
| GOTERM_CC_FAT          | histone H2A                                                                                                       | 8            | 6.10E-04 | 1.40E-02 |           |
| GOTERM_CC_FAT          | chromatin remodeling complex                                                                                      | 19           | 4.70E-03 | 7.10E-02 |           |
| GOTERM_CC_FAT          | transcriptional repressor complex                                                                                 | 12           | 1.60E-02 | 1.70E-01 |           |
| GOTERM_CC_FAT          | histone deacetylase complex                                                                                       | 10           | 8.80E-02 | 4.70E-01 |           |
| Enrichment Score: 2.08 |                                                                                                                   |              |          |          |           |
| Count                  |                                                                                                                   |              |          |          |           |
| INTERPRO               | Zinc finger_PHD-type                                                                                              | 23           | 1.50E-03 | 2.60E-01 |           |
| INTERPRO               | Zinc finger_PHD-finger                                                                                            | 23           | 2.60E-03 | 1.90E-01 |           |
| SMART                  | Zinc finger_PHD-type                                                                                              | 23           | 2.60E-03 | 1.90E-01 |           |
| INTERPRO               | Zinc finger_PHD-type, conserved site                                                                              | 21           | 1.10E-02 | 6.40E-01 |           |
| UP_SEQ_FEATURE         | zinc finger region:PHD-type 1                                                                                     | 12           | 4.40E-02 | 1.00E+00 |           |
| UP_SEQ_FEATURE         | zinc finger region:PHD-type 1                                                                                     | 8            | 9.60E-02 | 1.00E+00 |           |
| Enrichment Score: 2.07 |                                                                                                                   |              |          |          |           |
| Count                  |                                                                                                                   |              |          |          |           |
| GOTERM_MF_FAT          | transcription factor activity, nucleic acid binding                                                               | 25           | 1.20E-02 | 1.30E-02 |           |
| SP_PIR_KEYWORDS        | initiation factor                                                                                                 | 15           | 2.70E-03 | 3.50E-02 |           |
| GOTERM_BP_FAT          | translational initiation                                                                                          | 14           | 4.30E-03 | 1.10E-01 |           |
| GOTERM_MF_FAT          | translation initiation factor activity                                                                            | 16           | 9.00E-03 | 2.50E-01 |           |
| GOTERM_CC_FAT          | eukaryotic translation initiation factor 3 complex                                                                | 6            | 4.00E-02 | 2.90E-01 |           |
| GOTERM_BP_FAT          | regulation of translational initiation                                                                            | 10           | 8.30E-02 | 6.30E-01 |           |
| Enrichment Score: 2.06 |                                                                                                                   |              |          |          |           |
| Count                  |                                                                                                                   |              |          |          |           |
| GOTERM_BP_FAT          | transcription, DNA-dependent                                                                                      | 55           | 5.90E-03 | 1.40E-01 |           |
| GOTERM_BP_FAT          | RNA biosynthetic process                                                                                          | 55           | 7.80E-03 | 1.70E-01 |           |
| GOTERM_BP_FAT          | transcription from RNA polymerase II promoter                                                                     | 44           | 1.40E-02 | 2.50E-01 |           |
| Enrichment Score: 2.05 |                                                                                                                   |              |          |          |           |
| Count                  |                                                                                                                   |              |          |          |           |
| GOTERM_BP_FAT          | lysine-mediated immunity                                                                                          | 24           | 5.80E-04 | 2.80E-02 |           |
| GOTERM_BP_FAT          | immune effector process                                                                                           | 22           | 1.10E-03 | 3.00E-02 |           |
| GOTERM_BP_FAT          | lymphocyte mediated immunity                                                                                      | 20           | 1.40E-03 | 4.90E-02 |           |
| GOTERM_BP_FAT          | B cell mediated immunity                                                                                          | 15           | 1.20E-02 | 2.20E-01 |           |
| GOTERM_BP_FAT          | immunoglobulin mediated immune response                                                                           | 14           | 2.10E-02 | 3.10E-01 |           |
| GOTERM_BP_FAT          | adaptive immune response based on somatic recombination of immune receptors built from immunoglobulin superfamily | 18           | 2.10E-02 | 3.10E-01 |           |
| GOTERM_BP_FAT          | adaptive immune response                                                                                          | 18           | 2.10E-02 | 3.10E-01 |           |
| GOTERM_BP_FAT          | humoral immune response mediated by circulating immunoglobulin                                                    | 6            | 3.90E-01 | 9.70E-01 |           |
| Enrichment Score: 2.02 |                                                                                                                   |              |          |          |           |
| Count                  |                                                                                                                   |              |          |          |           |
| GOTERM_BP_FAT          | positive regulation of immune system process                                                                      | 47           | 4.60E-03 | 1.20E-01 |           |
| GOTERM_BP_FAT          | positive regulation of immune response                                                                            | 46           | 6.40E-03 | 1.50E-01 |           |
| ILMN_249425            | NA                                                                                                                | -0.4097      |          |          |           |





| Gene         | Accession     | Score       | Annotation                                                                                                                                                       | Count        | P_Value        | Benjamini        | Gene         | Accession | Score         | Annotation                                                                                                | Count        | P_Value  | Benjamini |
|--------------|---------------|-------------|------------------------------------------------------------------------------------------------------------------------------------------------------------------|--------------|----------------|------------------|--------------|-----------|---------------|-----------------------------------------------------------------------------------------------------------|--------------|----------|-----------|
| ILMN_1761068 | DKFZp434k1323 | 0.759113489 | GOTERM_BP_FAT <a href="#">angiogenesis</a>                                                                                                                       | 31           | 1.00E-02       | 2.00E-01         | ILMN_1859744 | A939525   | -0.42086686   | GOTERM_BP_FAT <a href="#">purine nucleotide metabolic process</a>                                         | 26           | 1.30E-01 | 9.70E-01  |
| ILMN_1798224 | KDMC5         | 0.758982766 | GOTERM_BP_FAT <a href="#">blood vessel morphogenesis</a>                                                                                                         | 39           | 2.70E-02       | 3.60E-01         | ILMN_1768992 | ZN790     | -0.420930585  | GOTERM_BP_FAT <a href="#">nucleotide biosynthetic process</a>                                             | 26           | 1.30E-01 | 9.70E-01  |
| ILMN_1787509 | PRC85         | 0.758851532 | GOTERM_BP_FAT <a href="#">blood vessel development</a>                                                                                                           | 44           | 3.00E-02       | 3.00E-01         | ILMN_1848955 | NA        | -0.420965069  | GOTERM_BP_FAT <a href="#">calcium ion transmembrane transporter activity</a>                              | 4            | 1.30E-01 | 9.70E-01  |
| ILMN_2058549 | SYK           | 0.758671164 | GOTERM_BP_FAT <a href="#">vasculature development</a>                                                                                                            | 44           | 4.20E-02       | 4.50E-01         | ILMN_1663118 | RAGEF1C   | -0.421011499  | GOTERM_BP_FAT <a href="#">hydrolytic activity, acting on acid anhydrides, catalysis</a>                   | 17           | 1.50E-01 | 9.80E-01  |
| ILMN_3248649 | MYO15B        | 0.758428679 | <b>Annotation Cluster 52</b> <a href="#">Enrichment Score: 1.61</a>                                                                                              | <b>Count</b> | <b>P_Value</b> | <b>Benjamini</b> | ILMN_1695108 | RSPO2     | -0.421060597  | GOTERM_BP_FAT <a href="#">transmembrane movement of substances</a>                                        | 17           | 1.50E-01 | 9.60E-01  |
| ILMN_1787844 | C19orf10      | 0.758341435 | GOTERM_BP_FAT <a href="#">SH3 domain binding</a>                                                                                                                 | 24           | 2.00E-03       | 1.20E-01         | ILMN_1720274 | C2orf65   | -0.421112694  | GOTERM_BP_FAT <a href="#">ribonucleotide metabolic process</a>                                            | 21           | 1.50E-01 | 9.80E-01  |
| ILMN_1756992 | MUC1          | 0.758303089 | GOTERM_BP_FAT <a href="#">SH3-binding</a>                                                                                                                        | 13           | 5.80E-02       | 3.20E-01         | ILMN_1672332 | LOC646862 | -0.421116657  | GOTERM_BP_FAT <a href="#">purine nucleotide biosynthetic process</a>                                      | 21           | 1.50E-01 | 9.80E-01  |
| ILMN_2349696 | CNH2          | 0.758228412 | UP_SEQ_FEATURE <a href="#">short sequence motif/SH3-binding</a>                                                                                                  | 11           | 1.20E-01       | 1.00E+00         | ILMN_3877558 | SELK      | -0.421219375  | GOTERM_BP_FAT <a href="#">P-3-kinase/tyrosine-driven transmembrane transporter activity</a>               | 18           | 1.50E-01 | 9.70E-01  |
| ILMN_1737379 | FAM195B       | 0.758241702 | <b>Annotation Cluster 53</b> <a href="#">Enrichment Score: 1.61</a>                                                                                              | <b>Count</b> | <b>P_Value</b> | <b>Benjamini</b> | ILMN_1681598 | PCDHG3    | -0.421302283  | GOTERM_BP_FAT <a href="#">purine nucleotide biosynthetic process</a>                                      | 18           | 1.50E-01 | 9.70E-01  |
| ILMN_3241446 | ODFB8         | 0.758165545 | UP_SEQ_FEATURE <a href="#">domain:BAR</a>                                                                                                                        | 7            | 1.20E-02       | 9.10E-01         | ILMN_1757281 | GRIN1     | -0.421305186  | GOTERM_BP_FAT <a href="#">proton-transporting V-type ATPase complex</a>                                   | 5            | 1.60E-01 | 9.30E-01  |
| ILMN_2306189 | MAGED1        | 0.757975406 | INTERPRO <a href="#">BAR</a>                                                                                                                                     | 6            | 3.20E-02       | 9.10E-01         | ILMN_1684730 | POM121L2  | -0.421363856  | GOTERM_BP_FAT <a href="#">nucleobase, nucleoside, nucleotide and nucleic acid, biosynthetic process</a>   | 26           | 1.70E-01 | 9.80E-01  |
| ILMN_1713909 | EDEM2         | 0.757937036 | SMART <a href="#">BAR</a>                                                                                                                                        | 6            | 3.80E-02       | 6.80E-01         | ILMN_3284078 | KRTAP16-1 | -0.421364059  | GOTERM_BP_FAT <a href="#">nucleobase, nucleoside, nucleotide and nucleic acid, biosynthetic process</a>   | 26           | 1.70E-01 | 9.80E-01  |
| ILMN_1804530 | ARPC1B        | 0.757887861 | <b>Annotation Cluster 54</b> <a href="#">Enrichment Score: 1.61</a>                                                                                              | <b>Count</b> | <b>P_Value</b> | <b>Benjamini</b> | ILMN_2073969 | ARHD13    | -0.421375678  | GOTERM_BP_FAT <a href="#">purine ribonucleotide biosynthetic process</a>                                  | 17           | 1.70E-01 | 9.80E-01  |
| ILMN_1796755 | ITGB5         | 0.757816349 | INTERPRO <a href="#">Ets</a>                                                                                                                                     | 10           | 7.50E-03       | 5.50E-01         | ILMN_1655117 | WDR19     | -0.421396867  | GOTERM_BP_FAT <a href="#">purine ribonucleotide triphosphate metabolic process</a>                        | 17           | 1.70E-01 | 9.80E-01  |
| ILMN_1815023 | PIM1          | 0.757678386 | SMART <a href="#">Ets</a>                                                                                                                                        | 10           | 1.00E-02       | 4.00E-01         | ILMN_2298275 | EFTUD1    | -0.421516702  | GOTERM_BP_FAT <a href="#">nitrogen compound biosynthetic process</a>                                      | 41           | 1.80E-01 | 9.80E-01  |
| ILMN_2340131 | MMPK10        | 0.757009895 | UP_SEQ_FEATURE <a href="#">DNA-binding region:ETS</a>                                                                                                            | 9            | 1.20E-02       | 9.10E-01         | ILMN_2351272 | DZP1      | -0.421518591  | INTERPRO <a href="#">ATPase, P-type, phospholipid-translocating, diggase</a>                              | 4            | 1.80E-01 | 1.00E+00  |
| ILMN_1768973 | HIST2H2AC     | 0.757009777 | INTERPRO <a href="#">Winged-helix repressor DNA-binding</a>                                                                                                      | 26           | 4.10E-01       | 1.00E+00         | ILMN_1669208 | TSPD2     | -0.421558258  | GOTERM_BP_FAT <a href="#">ATPase activity, coupled to transmembrane movement of substances</a>            | 17           | 1.80E-01 | 9.80E-01  |
| ILMN_1712755 | LRRc41        | 0.757003905 | <b>Annotation Cluster 55</b> <a href="#">Enrichment Score: 1.57</a>                                                                                              | <b>Count</b> | <b>P_Value</b> | <b>Benjamini</b> | ILMN_3186439 | NA        | -0.421562546  | GOTERM_BP_FAT <a href="#">phospholipid transporter activity</a>                                           | 16           | 1.90E-01 | 9.80E-01  |
| ILMN_1800317 | WNT5A         | 0.756873715 | GOTERM_BP_FAT <a href="#">intramolecular oxidoreductase activity</a>                                                                                             | 13           | 2.10E-03       | 1.20E-01         | ILMN_1696467 | SRSF2     | -0.421579849  | GOTERM_BP_FAT <a href="#">phospholipid transporter activity</a>                                           | 6            | 1.90E-01 | 9.80E-01  |
| ILMN_3246766 | NHP13         | 0.75638424  | UP_SEQ_FEATURE <a href="#">domain:Thioredoxin 1</a>                                                                                                              | 6            | 2.10E-03       | 5.60E-01         | ILMN_1750295 | ACN5      | -0.421635283  | GOTERM_BP_FAT <a href="#">ATPase activity, coupled to movement of substances</a>                          | 16           | 1.90E-01 | 9.80E-01  |
| ILMN_1653178 | AUP1          | 0.756316929 | UP_SEQ_FEATURE <a href="#">domain:Thioredoxin 2</a>                                                                                                              | 6            | 2.10E-03       | 5.60E-01         | ILMN_1713755 | SLC7A5P1  | -0.421637868  | GOTERM_BP_FAT <a href="#">ATPase activity, coupled to transmembrane movement of substances</a>            | 9            | 2.00E-01 | 9.80E-01  |
| ILMN_1812403 | BCAP31        | 0.755498888 | INTERPRO <a href="#">Disulphide isomerase</a>                                                                                                                    | 5            | 3.10E-03       | 3.70E-01         | ILMN_1705377 | DNAH14    | -0.421685041  | GOTERM_BP_FAT <a href="#">purine ribonucleotide metabolic process</a>                                     | 19           | 2.10E-01 | 9.90E-01  |
| ILMN_1724990 | C3orf75       | 0.755437233 | INTERPRO <a href="#">Thioredoxin-like intramolecular oxidoreductase activity, interconverting keto- and enol-groups</a>                                          | 12           | 3.70E-03       | 4.10E-01         | ILMN_1900154 | BUS36494  | -0.421703168  | GOTERM_BP_FAT <a href="#">phospholipid-translocating ATPase activity</a>                                  | 4            | 2.10E-01 | 9.80E-01  |
| ILMN_1810467 | PPP2R1A       | 0.755279821 | GOTERM_BP_FAT <a href="#">intramolecular oxidoreductase activity, transposing S-S bonds</a>                                                                      | 5            | 2.00E-02       | 3.80E-01         | ILMN_1832920 | LOC115110 | -0.421741186  | GOTERM_BP_FAT <a href="#">ATPase activity, coupled to proton transport, down electrochemical gradient</a> | 4            | 2.10E-01 | 9.80E-01  |
| ILMN_2347234 | PRMT1         | 0.755278681 | GOTERM_BP_FAT <a href="#">protein disulfide isomerase activity</a>                                                                                               | 5            | 2.00E-02       | 3.80E-01         | ILMN_3305933 | LOC730668 | -0.421755043  | GOTERM_BP_FAT <a href="#">hydrogen ion transmembrane transporter activity</a>                             | 15           | 2.20E-01 | 9.80E-01  |
| ILMN_1802706 | DH3G          | 0.755274672 | GOTERM_BP_FAT <a href="#">Thioredoxin-like disulfide isomerase activity</a>                                                                                      | 5            | 2.00E-02       | 3.80E-01         | ILMN_3274006 | BC153822  | -0.421773219  | GOTERM_BP_FAT <a href="#">hydrogen transport</a>                                                          | 10           | 2.20E-01 | 9.90E-01  |
| ILMN_1766222 | LARF4B        | 0.75493525  | INTERPRO <a href="#">Thioredoxin-like subdomain</a>                                                                                                              | 5            | 2.80E-02       | 8.80E-01         | ILMN_1713892 | C4orf34   | -0.421782949  | GOTERM_BP_FAT <a href="#">ligand transporter activity</a>                                                 | 10           | 2.30E-01 | 9.80E-01  |
| ILMN_1721977 | NAA10         | 0.754893092 | INTERPRO <a href="#">Thioredoxin fold</a>                                                                                                                        | 20           | 4.70E-02       | 9.20E-01         | ILMN_1839367 | BXOR9716  | -0.421802516  | SP_PIR_KEYWORDS <a href="#">Hydrogen ion transport</a>                                                    | 8            | 2.30E-01 | 9.80E-01  |
| ILMN_1776678 | GIMAP7        | 0.754823661 | PIR_SUPERFAMILY <a href="#">PIRSF001487:protein disulfide-isomerase</a>                                                                                          | 4            | 5.70E-02       | 1.00E+00         | ILMN_3308210 | MIR195    | -0.421824979  | GOTERM_BP_FAT <a href="#">ATP synthesis coupled proton transport</a>                                      | 7            | 2.50E-01 | 9.90E-01  |
| ILMN_1782292 | LAMP1         | 0.754713332 | SP_PIR_KEYWORDS <a href="#">Redox-active center</a>                                                                                                              | 10           | 5.90E-02       | 3.20E-01         | ILMN_1691976 | TEX11     | -0.421833839  | GOTERM_BP_FAT <a href="#">ATP synthesis coupled proton transport, down electrochemical gradient</a>       | 7            | 2.50E-01 | 9.90E-01  |
| ILMN_1804444 | PDIA2         | 0.754706688 | GOTERM_BP_FAT <a href="#">cell redox homeostasis</a>                                                                                                             | 14           | 6.90E-02       | 5.70E-01         | ILMN_1739045 | RWD04     | -0.421861943  | GOTERM_BP_FAT <a href="#">calcium-transporting ATPase activity</a>                                        | 3            | 2.50E-01 | 9.90E-01  |
| ILMN_2198893 | MAMP2K2       | 0.754674051 | UP_SEQ_FEATURE <a href="#">site:lowers pKa of C-terminal Cys of first active site</a>                                                                            | 3            | 7.40E-02       | 1.00E+00         | ILMN_1726603 | ATP5I     | -0.421882992  | GOTERM_BP_FAT <a href="#">proton-transporting V-type ATPase, V1 domain</a>                                | 3            | 2.50E-01 | 9.50E-01  |
| ILMN_2114422 | NOD1          | 0.754510983 | UP_SEQ_FEATURE <a href="#">site:lowers pKa of C-terminal Cys of second active site</a>                                                                           | 3            | 7.40E-02       | 1.00E+00         | ILMN_1743319 | FAFH1B2   | -0.421915585  | GOTERM_BP_FAT <a href="#">hydrogen ion transmembrane transporter activity</a>                             | 13           | 2.50E-01 | 9.90E-01  |
| ILMN_1672650 | PKM2          | 0.754493707 | INTERPRO <a href="#">Protein disulfide isomerase</a>                                                                                                             | 3            | 9.20E-03       | 9.50E-01         | ILMN_1725559 | NEURD6    | -0.421924066  | GOTERM_BP_FAT <a href="#">ion transmembrane transport</a>                                                 | 8            | 2.60E-01 | 9.80E-01  |
| ILMN_1808017 | FSM1E1        | 0.754242628 | INTERPRO <a href="#">Thioredoxin domain</a>                                                                                                                      | 7            | 1.20E-01       | 9.70E-01         | ILMN_1664400 | FAM108B1  | -0.422033607  | GOTERM_BP_FAT <a href="#">phospholipid transport</a>                                                      | 6            | 2.70E-01 | 9.90E-01  |
| ILMN_1681679 | TSPD          | 0.754116091 | UP_SEQ_FEATURE <a href="#">site:Contributes to redox potential value</a>                                                                                         | 3            | 2.00E-01       | 1.00E+00         | ILMN_3289764 | SP9       | -0.422021701  | KEGG_PATHWAY <a href="#">Vibrio cholerae infection</a>                                                    | 9            | 2.80E-01 | 9.40E-01  |
| ILMN_1689004 | TNFRSF12A     | 0.75410636  | INTERPRO <a href="#">Thioredoxin conserved site</a>                                                                                                              | 6            | 2.20E-01       | 1.00E+00         | ILMN_2186482 | C12AM2    | -0.422054381  | GOTERM_BP_FAT <a href="#">vacuolar proton-transporting V-type ATPase complex</a>                          | 3            | 2.90E-01 | 6.60E-01  |
| ILMN_2399352 | MIG1          | 0.75399574  | SP_PIR_KEYWORDS <a href="#">redox-active disulfide</a>                                                                                                           | 3            | 2.50E-01       | 6.90E-01         | ILMN_1703894 | SXL1A     | -0.422156804  | GOTERM_BP_FAT <a href="#">ATPase activity</a>                                                             | 40           | 3.10E-01 | 9.90E-01  |
| ILMN_1775522 | SAGE1         | 0.753702943 | <b>Annotation Cluster 56</b> <a href="#">Enrichment Score: 1.53</a>                                                                                              | <b>Count</b> | <b>P_Value</b> | <b>Benjamini</b> | ILMN_1679318 | AR5J      | -0.422202321  | GOTERM_BP_FAT <a href="#">proton transport</a>                                                            | 9            | 3.20E-01 | 9.90E-01  |
| ILMN_1663980 | LRNG          | 0.753684849 | INTERPRO <a href="#">Ribosomal protein L7Aa/L30a/S12a/GadGds</a>                                                                                                 | 6            | 7.80E-03       | 5.40E-01         | ILMN_1850340 | AVR262671 | -0.422249302  | GOTERM_BP_FAT <a href="#">mitochondrial proton-transporting ATP synthase complex</a>                      | 4            | 3.40E-01 | 9.50E-01  |
| ILMN_2206746 | SGN           | 0.753434943 | INTERPRO <a href="#">Ribosomal protein L7Ae conserved site</a>                                                                                                   | 3            | 4.40E-02       | 9.10E-01         | ILMN_1793578 | ZFP37     | -0.422293901  | GOTERM_BP_FAT <a href="#">ATPase activity, coupled</a>                                                    | 32           | 3.80E-01 | 9.90E-01  |
| ILMN_1677484 | SNAPC4        | 0.753429177 | INTERPRO <a href="#">Ribosomal protein L7A/RS6 family PIRSF002165:ribosomal protein, L7Ab/L7Aa/L7Ae/L8e types/H/ACA ribonucleoprotein complex, NHP2 subunit</a>  | 3            | 4.40E-02       | 9.10E-01         | ILMN_1774432 | DTD1      | -0.422310182  | GOTERM_BP_FAT <a href="#">proton-transporting ATP synthase complex</a>                                    | 4            | 4.00E-01 | 9.60E-01  |
| ILMN_1708881 | RAB20         | 0.753419869 | PIR_SUPERFAMILY <a href="#">PIRSF002165:ribosomal protein, L7Ab/L7Aa/L7Ae/L8e types/H/ACA ribonucleoprotein complex, NHP2 subunit</a>                            | 3            | 5.00E-02       | 1.00E+00         | ILMN_1731181 | TEX2      | -0.422384271  | SP_PIR_KEYWORDS <a href="#">cfl1</a>                                                                      | 3            | 4.00E-01 | 9.40E-01  |
| ILMN_1761844 | ZCCHC17       | 0.753381459 | <b>Annotation Cluster 57</b> <a href="#">Enrichment Score: 1.5</a>                                                                                               | <b>Count</b> | <b>P_Value</b> | <b>Benjamini</b> | ILMN_1749375 | TNFAIP8   | -0.422386726  | GOTERM_BP_FAT <a href="#">proton-transporting ATP synthase, rotational mechanism</a>                      | 4            | 4.50E-01 | 1.00E+00  |
| ILMN_1711862 | TNOC11        | 0.75318273  | UP_SEQ_FEATURE <a href="#">zinc finger region:C4-type</a>                                                                                                        | 18           | 2.50E-03       | 5.70E-01         | ILMN_1752094 | EIF3M     | -0.422423994  | INTERPRO <a href="#">ATPase, P-type, cation-transporter, c-terminal</a>                                   | 3            | 4.80E-01 | 1.00E+00  |
| ILMN_1659771 | RPL13A3P      | 0.75313201  | GOTERM_BP_FAT <a href="#">regulation of ARE protein signal transduction</a>                                                                                      | 13           | 9.70E-03       | 1.90E-01         | ILMN_1702889 | OR2AK2    | -0.422448739  | GOTERM_BP_FAT <a href="#">proton-transporting two-sector ATPase complex, proton-transporting domain</a>   | 4            | 4.80E-01 | 9.70E-01  |
| ILMN_2410772 | KACP1         | 0.753004726 | UP_SEQ_FEATURE <a href="#">domain:Arf-GAP</a>                                                                                                                    | 9            | 1.50E-02       | 9.40E-01         | ILMN_2103133 | PDD211    | -0.422459642  | GOTERM_BP_FAT <a href="#">proton-transporting ATP synthase complex, coupling factor</a>                   | 3            | 4.90E-01 | 9.70E-01  |
| ILMN_2358914 | SLC35C2       | 0.752972127 | INTERPRO <a href="#">Arf GTPase activating protein</a>                                                                                                           | 9            | 1.90E-02       | 8.00E-01         | ILMN_2412564 | NCBP2     | -0.422476376  | PIR_SUPERFAMILY <a href="#">PIRSF01297:Na(+)/K(+)-transporting ATPase alpha chain</a>                     | 3            | 4.90E-01 | 1.00E+00  |
| ILMN_1730670 | FSTL3         | 0.752941615 | GOTERM_BP_FAT <a href="#">regulation of ARE GTPase activity</a>                                                                                                  | 9            | 2.40E-02       | 3.30E-01         | ILMN_1762629 | AN09      | -0.422531645  | GOTERM_BP_FAT <a href="#">hydrogen ion transmembrane transporter activity, rotational mechanism</a>       | 3            | 5.20E-01 | 1.00E+00  |
| ILMN_1688959 | CDD2          | 0.752626113 | SMART <a href="#">ArfGAP</a>                                                                                                                                     | 9            | 2.50E-02       | 6.00E-01         | ILMN_1773650 | LRRN3     | -0.422551983  | GOTERM_BP_FAT <a href="#">ATPase, P-type cation-transporter, N-terminal</a>                               | 3            | 5.50E-01 | 1.00E+00  |
| ILMN_1773487 | SUGP2         | 0.752475521 | GOTERM_BP_FAT <a href="#">ARE GTPase activator activity</a>                                                                                                      | 9            | 2.60E-02       | 4.50E-01         | ILMN_3334513 | CDC72     | -0.422560887  | GOTERM_BP_FAT <a href="#">proton-transporting two-sector ATPase complex, catalytic domain</a>             | 3            | 5.90E-01 | 9.70E-01  |
| ILMN_1731811 | JUP           | 0.752348672 | GOTERM_BP_FAT <a href="#">regulation of GTPase activity</a>                                                                                                      | 22           | 1.30E-01       | 7.50E-01         | ILMN_1650803 | AR11      | -0.422598472  | GOTERM_BP_FAT <a href="#">ligand transport</a>                                                            | 15           | 6.80E-01 | 1.00E+00  |
| ILMN_3209220 | NA            | 0.752230086 | GOTERM_BP_FAT <a href="#">regulation of Ras GTPase activity</a>                                                                                                  | 19           | 1.40E-01       | 7.70E-01         | ILMN_1777476 | SPDYC     | -0.422601802  | GOTERM_BP_FAT <a href="#">ligand localization</a>                                                         | 16           | 7.00E-01 | 1.00E+00  |
| ILMN_3242900 | HIST2H2AA4    | 0.7521808   | GOTERM_BP_FAT <a href="#">regulation of hydrolase activity</a>                                                                                                   | 46           | 4.90E-01       | 9.90E-01         | ILMN_1685104 | C5orf6    | -0.422604869  | KEGG_PATHWAY <a href="#">Epithelial cell signaling in Helicobacter pylori infection</a>                   | 7            | 7.90E-01 | 9.70E-01  |
| ILMN_1778144 | SLC8A1        | 0.752087304 | <b>Annotation Cluster 58</b> <a href="#">Enrichment Score: 1.48</a>                                                                                              | <b>Count</b> | <b>P_Value</b> | <b>Benjamini</b> | ILMN_1685413 | ALG8      | -0.4226215704 | KEGG_PATHWAY <a href="#">Oxidative phosphorylation</a>                                                    | 13           | 8.00E-01 | 9.70E-01  |
| ILMN_1886655 | TCRFB         | 0.75191266  | GOTERM_BP_FAT <a href="#">positive regulation of adaptive immune response</a>                                                                                    | 12           | 1.40E-03       | 4.90E-02         | ILMN_2210219 | PRM1      | -0.422629432  | GOTERM_BP_FAT <a href="#">oxidative phosphorylation</a>                                                   | 8            | 9.10E-01 | 1.00E+00  |
| ILMN_1724059 | GAS2L1        | 0.751852332 | <a href="#">positive regulation of adaptive immune response based on somatic recombination of immune receptors built from immunoglobulin superfamily domains</a> | 11           | 3.80E-03       | 1.00E-01         | ILMN_3262321 | PATE4     | -0.422634123  | <b>Annotation Cluster 74</b> <a href="#">Enrichment Score: 0.7</a>                                        | <b>Count</b> |          |           |

| Gene         | Enrichment Score | Count        | P-Value | Benjamini | Gene         | Enrichment Score | Count        | P-Value | Benjamini |
|--------------|------------------|--------------|---------|-----------|--------------|------------------|--------------|---------|-----------|
| ILMN_1738523 | MY088            | 0.749143118  |         |           | ILMN_1787886 | ADAMTS13         | -0.424117354 |         |           |
| ILMN_3188110 | C19orf60         | 0.749113677  |         |           | ILMN_1675584 | HTRA4            | -0.42413881  |         |           |
| ILMN_2219134 | PP151            | 0.749081538  |         |           | ILMN_2355463 | CYIP11           | -0.424024293 |         |           |
| ILMN_1659976 | BF31             | 0.748996668  |         |           | ILMN_1802105 | STW1             | -0.424025734 |         |           |
| ILMN_1674137 | KMR2             | 0.748912493  |         |           | ILMN_1770023 | TURBG6P          | -0.424026620 |         |           |
| ILMN_1811624 | THADA            | 0.748883475  |         |           | ILMN_1736223 | IQCH             | -0.424272159 |         |           |
| ILMN_1676765 | RPL18A           | 0.748863715  |         |           | ILMN_1655348 | GPR1             | -0.424277053 |         |           |
| ILMN_2336902 | TRIM6            | 0.748798674  |         |           | ILMN_2079059 | KRTAP4-11        | -0.424288365 |         |           |
| ILMN_1754145 | CAPRIN1          | 0.748648943  |         |           | ILMN_1785574 | HTRA2            | -0.424344666 |         |           |
| ILMN_1792584 | TK2              | 0.748482342  |         |           | ILMN_1749942 | SARPD10          | -0.424300916 |         |           |
| ILMN_1695958 | RPL18            | 0.7484241343 |         |           | ILMN_1693303 | TAS2R41          | -0.424410513 |         |           |
| ILMN_2402272 | TCEAL8           | 0.748072525  |         |           | ILMN_1712999 | MGM4             | -0.424427509 |         |           |
| ILMN_1732328 | RPL22            | 0.747994322  |         |           | ILMN_1859160 | BX110173         | -0.424454343 |         |           |
| ILMN_1742167 | TUBA1C           | 0.747898086  |         |           | ILMN_1878007 | FUT9             | -0.424469342 |         |           |
| ILMN_1676750 | ADPMT1           | 0.747821968  |         |           | ILMN_2148193 | MPPED2           | -0.42458187  |         |           |
| ILMN_1789136 | SER2             | 0.747787471  |         |           | ILMN_1801053 | C15orf2          | -0.424637832 |         |           |
| ILMN_1690085 | STK11P           | 0.747659546  |         |           | ILMN_2253805 | GFR1A1           | -0.424607489 |         |           |
| ILMN_1699015 | H3F3A            | 0.747575539  |         |           | ILMN_1801646 | BX109627         | -0.424648169 |         |           |
| ILMN_3202432 | RPSA             | 0.747469134  |         |           | ILMN_2076658 | MRLP1            | -0.424946744 |         |           |
| ILMN_1805161 | LTR1             | 0.747419021  |         |           | ILMN_1803673 | LOC113230        | -0.424988471 |         |           |
| ILMN_2179212 | ITGB2            | 0.747379246  |         |           | ILMN_1658109 | LOC21442         | -0.425011137 |         |           |
| ILMN_1752197 | PDDC1            | 0.747305129  |         |           | ILMN_1771223 | CHMP4B           | -0.425019744 |         |           |
| ILMN_1755658 | AB13             | 0.747162783  |         |           | ILMN_1688634 | NA               | -0.425068716 |         |           |
| ILMN_1725534 | ACTN4            | 0.747091663  |         |           | ILMN_1688346 | ZNF800           | -0.425144867 |         |           |
| ILMN_3247781 | AKO97701         | 0.746990724  |         |           | ILMN_1664216 | NKRA51           | -0.425154091 |         |           |
| ILMN_2051876 | CTDSP2           | 0.746916267  |         |           | ILMN_1714185 | CELSR3           | -0.425170725 |         |           |
| ILMN_1700244 | CNTN8B           | 0.746822693  |         |           | ILMN_2043306 | EPBA115          | -0.425228015 |         |           |
| ILMN_1732296 | ID3              | 0.746592473  |         |           | ILMN_1672076 | WFDCL0B          | -0.425299372 |         |           |
| ILMN_1689855 | C20orf194        | 0.746450291  |         |           | ILMN_1874710 | DA691010         | -0.425337705 |         |           |
| ILMN_2148819 | TUBA1A           | 0.746400147  |         |           | ILMN_2195060 | OR8K5            | -0.425405996 |         |           |
| ILMN_1737344 | DDX41            | 0.745781333  |         |           | ILMN_1871136 | DR731427         | -0.425454713 |         |           |
| ILMN_1796941 | CD4R1            | 0.745745249  |         |           | ILMN_1737926 | AT5G151          | -0.425494141 |         |           |
| ILMN_1803813 | A5TE1            | 0.745701066  |         |           | ILMN_1834233 | AW131812         | -0.425588005 |         |           |
| ILMN_3241657 | TMEM204          | 0.745431323  |         |           | ILMN_1699852 | CE5A4            | -0.425595728 |         |           |
| ILMN_1807535 | YWHAE            | 0.745411392  |         |           | ILMN_2081863 | NDFB4            | -0.425625577 |         |           |
| ILMN_1765371 | LCU7L            | 0.745317437  |         |           | ILMN_1760414 | AADC4            | -0.425643518 |         |           |
| ILMN_1607796 | PTMA             | 0.745313514  |         |           | ILMN_1736510 | FONZ2            | -0.42564788  |         |           |
| ILMN_1681924 | RHBD01           | 0.745280215  |         |           | ILMN_1745851 | IRFAP2           | -0.425638976 |         |           |
| ILMN_1756955 | SH3TC1           | 0.745104216  |         |           | ILMN_2328823 | Cxorf49          | -0.42571376  |         |           |
| ILMN_3243297 | RPL6             | 0.745100352  |         |           | ILMN_2229884 | NTS1B            | -0.425742622 |         |           |
| ILMN_1689898 | CDC42BP8         | 0.745035512  |         |           | ILMN_2286800 | DMN1L            | -0.425744372 |         |           |
| ILMN_1730940 | KHOC2            | 0.744992527  |         |           | ILMN_2089902 | NU51             | -0.425745231 |         |           |
| ILMN_1678827 | SPY7P7           | 0.744941915  |         |           | ILMN_1717571 | HADHA            | -0.425747776 |         |           |
| ILMN_1687021 | GMEB2            | 0.744792521  |         |           | ILMN_2044638 | D09Z9            | -0.425759026 |         |           |
| ILMN_2261416 | CD3D             | 0.744578995  |         |           | ILMN_1891885 | AI219815         | -0.425866906 |         |           |
| ILMN_2411076 | MATR3            | 0.744547337  |         |           | ILMN_2065635 | MTX2             | -0.425912992 |         |           |
| ILMN_2384591 | HN1              | 0.744528533  |         |           | ILMN_1849267 | BD026495         | -0.425920313 |         |           |
| ILMN_2335398 | CECR5            | 0.744517035  |         |           | ILMN_1760955 | C1orf100         | -0.425923315 |         |           |
| ILMN_1684297 | PRKCA2           | 0.744482876  |         |           | ILMN_1735401 | C1orf67          | -0.425923315 |         |           |
| ILMN_1738347 | RNP1P            | 0.744425205  |         |           | ILMN_1737372 | BCO35647         | -0.425927153 |         |           |
| ILMN_2306264 | RPL8             | 0.744246643  |         |           | ILMN_1921285 | GPC5             | -0.426032637 |         |           |
| ILMN_2622288 | EEF1G            | 0.744154237  |         |           | ILMN_2178994 | TUBB8            | -0.42619813  |         |           |
| ILMN_1703288 | C19orf6          | 0.744096924  |         |           | ILMN_2153547 | OR4C15           | -0.426243844 |         |           |
| ILMN_1666050 | TMB1             | 0.743525168  |         |           | ILMN_1700048 | BX107512         | -0.426253652 |         |           |
| ILMN_1664961 | CD1              | 0.743523495  |         |           | ILMN_1894862 | AW130728         | -0.426269146 |         |           |
| ILMN_1688561 | TM18             | 0.743354483  |         |           | ILMN_1806294 | RPS6A3           | -0.426313921 |         |           |
| ILMN_1814998 | POTEXP           | 0.743325444  |         |           | ILMN_2376258 | SMARCA1          | -0.4264026   |         |           |
| ILMN_2343775 | RPL38            | 0.743226412  |         |           | ILMN_2326671 | CLRN2            | -0.426436531 |         |           |
| ILMN_1698940 | RPL15            | 0.743092523  |         |           | ILMN_1760798 | RYR2             | -0.426460324 |         |           |
| ILMN_1742521 | GRL2             | 0.743086828  |         |           | ILMN_1769810 | ARL6P5           | -0.426698823 |         |           |
| ILMN_1776910 | LMNA2            | 0.74308332   |         |           | ILMN_1703826 | UNC5D            | -0.426706936 |         |           |
| ILMN_2356284 | PF0N5            | 0.743081719  |         |           | ILMN_1824498 | BQ889978         | -0.426773639 |         |           |
| ILMN_3248069 | RPL3             | 0.742726182  |         |           | ILMN_1782881 | DLU7             | -0.426873294 |         |           |
| ILMN_1724422 | SELL             | 0.742701863  |         |           | ILMN_1789868 | MTIE             | -0.426940247 |         |           |
| ILMN_1678235 | KIAA1267         | 0.742578781  |         |           | ILMN_2309965 | MIRLET7F2        | -0.427010655 |         |           |
| ILMN_2334440 | TMR5F1           | 0.742544842  |         |           | ILMN_2405023 | PPP1C8           | -0.427108504 |         |           |
| ILMN_1758100 | CALR3            | 0.742414912  |         |           | ILMN_1723237 | LECT1            | -0.427112326 |         |           |
| ILMN_1659744 | PRMT1            | 0.74238718   |         |           | ILMN_1903159 | PPM1A            | -0.427159427 |         |           |
| ILMN_1694778 | KRT18            | 0.742292768  |         |           | ILMN_1885762 | AI140602         | -0.427257499 |         |           |
| ILMN_1699931 | HCT5             | 0.742242456  |         |           | ILMN_2309799 | MIR569           | -0.427263382 |         |           |
| ILMN_1751530 | GAD65GIP1        | 0.742126611  |         |           | ILMN_1788701 | SSP3             | -0.427268444 |         |           |
| ILMN_1812392 | TMS6B10          | 0.741990104  |         |           | ILMN_1809071 | SNA3             | -0.427355744 |         |           |
| ILMN_2054919 | RSGL1            | 0.741895968  |         |           | ILMN_1879797 | MSEB             | -0.427383884 |         |           |
| ILMN_2095597 | DDH16            | 0.741683981  |         |           | ILMN_1809035 | SYT7             | -0.427498519 |         |           |
| ILMN_1809013 | MYL6             | 0.741657101  |         |           | ILMN_1686688 | AAT76245         | -0.427506992 |         |           |
| ILMN_2154671 | CXCR8            | 0.74161683   |         |           | ILMN_2234454 | TYT7             | -0.427510999 |         |           |
| ILMN_1659905 | RPL7A            | 0.741455594  |         |           | ILMN_1741176 | CHMP2B           | -0.427548572 |         |           |
| ILMN_1669281 | CLN3             | 0.741446253  |         |           | ILMN_1803072 | F798827          | -0.427599688 |         |           |
| ILMN_3248497 | RPL7A            | 0.741443371  |         |           | ILMN_1813881 | CNR1             | -0.427593645 |         |           |
| ILMN_1760808 | RPS2             | 0.741379833  |         |           | ILMN_1755611 | USP2             | -0.427619797 |         |           |
| ILMN_1728626 | WRDS5            | 0.741376304  |         |           | ILMN_1852040 | AW263556         | -0.427624859 |         |           |
| ILMN_2415011 | DCTD             | 0.741303668  |         |           | ILMN_1657191 | KRTAP10-5        | -0.427635264 |         |           |
| ILMN_1728049 | S100A16          | 0.741253522  |         |           | ILMN_1874577 | LOC440117        | -0.427692003 |         |           |
| ILMN_2316582 | HRP111           | 0.74122796   |         |           | ILMN_2058205 | FAT2FC1          | -0.427703933 |         |           |
| ILMN_1738684 | NKX02            | 0.741212652  |         |           | ILMN_2128741 | RDH11            | -0.427813753 |         |           |
| ILMN_1724907 | NUD3T            | 0.740878563  |         |           | ILMN_1785379 | ZNF8             | -0.427831674 |         |           |
| ILMN_2096654 | COMM4D           | 0.740786308  |         |           | ILMN_2227790 | GRIN2C           | -0.427835691 |         |           |
| ILMN_2280548 | FYB              | 0.740748247  |         |           | ILMN_2341451 | MRAP2            | -0.427847201 |         |           |
| ILMN_1651899 | RPL19            | 0.740625479  |         |           | ILMN_1787196 | LYL1             | -0.427889431 |         |           |
| ILMN_2057829 | RSGL1            | 0.740627932  |         |           | ILMN_2055215 | FAM79C           | -0.427890616 |         |           |
| ILMN_1653797 | C6orf67          | 0.740581918  |         |           | ILMN_1812461 | WSP2             | -0.427907155 |         |           |
| ILMN_3241136 | RNA5KE           | 0.740543971  |         |           | ILMN_1769546 | RIN2             | -0.427931358 |         |           |
| ILMN_1757327 | PKM2             | 0.740474168  |         |           | ILMN_1891857 | RAB2A            | -0.428033007 |         |           |
| ILMN_1786176 | CDS7             | 0.740269633  |         |           | ILMN_1688723 | MSX2P1           | -0.428064247 |         |           |
| ILMN_1734184 | PLD82            | 0.740195157  |         |           | ILMN_1887705 | BX48850          | -0.428068483 |         |           |
| ILMN_2207579 | RPS1             | 0.740161632  |         |           | ILMN_2176646 | IPK2P            | -0.428089081 |         |           |
| ILMN_2321416 | DIAPH1           | 0.740019288  |         |           | ILMN_1888130 | CXN21113         | -0.42809942  |         |           |
| ILMN_1787886 | ADAMTS13         | -0.424117354 |         |           | ILMN_1675584 | HTRA4            | -0.42413881  |         |           |
| ILMN_2355463 | CYIP11           | -0.424024293 |         |           | ILMN_1802105 | STW1             | -0.424025734 |         |           |
| ILMN_1770023 | TURBG6P          | -0.424026620 |         |           | ILMN_1736223 | IQCH             | -0.424272159 |         |           |
| ILMN_1655348 | GPR1             | -0.424277053 |         |           | ILMN_2079059 | KRTAP4-11        | -0.424288365 |         |           |
| ILMN_1785574 | HTRA2            | -0.424344666 |         |           | ILMN_1749942 | SARPD10          | -0.424300916 |         |           |
| ILMN_1693303 | TAS2R41          | -0.424410513 |         |           | ILMN_1712999 | MGM4             | -0.424427509 |         |           |
| ILMN_1859160 | BX110173         | -0.424454343 |         |           | ILMN_1878007 | FUT9             | -0.424469342 |         |           |
| ILMN_2148193 | MPPED2           | -0.42458187  |         |           | ILMN_1801053 | C15orf2          | -0.424637832 |         |           |
| ILMN_2253805 | GFR1A1           | -0.424607489 |         |           | ILMN_1801646 | BX109627         | -0.424648169 |         |           |
| ILMN_2076658 | MRLP1            | -0.424946744 |         |           | ILMN_1803673 | LOC113230        | -0.424988471 |         |           |
| ILMN_1658109 | LOC21442         | -0.425011137 |         |           | ILMN_1771223 | CHMP4B           | -0.425019744 |         |           |
| ILMN_1771223 | CHMP4B           | -0.425019744 |         |           | ILMN_1688634 | NA               | -0.425068716 |         |           |
| ILMN_1688634 | NA               | -0.425068716 |         |           | ILMN_1688346 | ZNF800           | -0.425144867 |         |           |
| ILMN_1664216 | NKRA51           | -0.425154091 |         |           | ILMN_1664216 | NKRA51           | -0.425154091 |         |           |
| ILMN_1714185 | CELSR3           | -0.425170725 |         |           | ILMN_2043306 | EPBA115          | -0.425228015 |         |           |
| ILMN_2043306 | EPBA115          | -0.425228015 |         |           | ILMN_1672076 | WFDCL0B          | -0.425299372 |         |           |
| ILMN_1672076 | WFDCL0B          | -0.425299372 |         |           | ILMN_1874710 | DA691010         | -0.425337705 |         |           |
| ILMN_1874710 | DA691010         | -0.425337705 |         |           | ILMN_2195060 | OR8K5            | -0.425405996 |         |           |
| ILMN_2195060 | OR8K5            | -0.425405996 |         |           | ILMN_1871136 | DR731427         | -0.425454713 |         |           |
| ILMN_1871136 | DR731427         | -0.425454713 |         |           | ILMN_1737926 | AT5G151          | -0.425494141 |         |           |
| ILMN_1834233 | AW131812         | -0.425588005 |         |           | ILMN_1699852 | CE5A4            | -0.425595728 |         |           |
| ILMN_1699852 | CE5A4            | -            |         |           |              |                  |              |         |           |









| Gene         | Count | P_Value     | Benjamini | Annotation      | Count | P_Value     | Benjamini | Annotation |
|--------------|-------|-------------|-----------|-----------------|-------|-------------|-----------|------------|
| ILMN_2369580 | 1     | 0.12439732  |           | BIOCARTA        | 1     | 0.12439732  |           |            |
| ILMN_1789510 | 1     | 0.12271416  |           | GOTERM_CC_FAT   | 1     | 0.12271416  |           |            |
| ILMN_1692168 | 1     | 0.12159695  |           | KEGG_PATHWAY    | 1     | 0.12159695  |           |            |
| ILMN_1813669 | 1     | 0.12056439  |           | GOTERM_BP_FAT   | 1     | 0.12056439  |           |            |
| ILMN_1795227 | 1     | 0.11828081  |           | SP_PIR_KEYWORDS | 1     | 0.11828081  |           |            |
| ILMN_1728163 | 1     | 0.11755555  |           | BIOCARTA        | 1     | 0.11755555  |           |            |
| ILMN_1699703 | 1     | 0.11612524  |           | BIOCARTA        | 1     | 0.11612524  |           |            |
| ILMN_3243700 | 1     | 0.11544341  |           | BIOCARTA        | 1     | 0.11544341  |           |            |
| ILMN_1678229 | 1     | 0.11449205  |           | BIOCARTA        | 1     | 0.11449205  |           |            |
| ILMN_2121207 | 1     | 0.11333192  |           | FAM125A         | 1     | 0.11333192  |           |            |
| ILMN_1739622 | 1     | 0.11317422  |           | ILMN_1739622    | 1     | 0.11317422  |           |            |
| ILMN_1803036 | 1     | 0.11254556  |           | TARBP1          | 1     | 0.11254556  |           |            |
| ILMN_1720799 | 1     | 0.110984938 |           | TECR            | 1     | 0.110984938 |           |            |
| ILMN_1721225 | 1     | 0.10812604  |           | G2orf4          | 1     | 0.10812604  |           |            |
| ILMN_3289171 | 1     | 0.10729327  |           | HPS27           | 1     | 0.10729327  |           |            |
| ILMN_1675156 | 1     | 0.10657034  |           | SMART           | 1     | 0.10657034  |           |            |
| ILMN_1681269 | 1     | 0.10472999  |           |                 | 1     | 0.10472999  |           |            |
| ILMN_1739199 | 1     | 0.10470181  |           | WASH2P          | 1     | 0.10470181  |           |            |
| ILMN_3251100 | 1     | 0.10338722  |           | MEF2A           | 1     | 0.10338722  |           |            |
| ILMN_1766682 | 1     | 0.10229459  |           | STAG3L2         | 1     | 0.10229459  |           |            |
| ILMN_1651262 | 1     | 0.10229282  |           | HNRNPAB         | 1     | 0.10229282  |           |            |
| ILMN_1686901 | 1     | 0.10209788  |           | OSK1            | 1     | 0.10209788  |           |            |
| ILMN_1752354 | 1     | 0.1009978   |           | SCL2L2          | 1     | 0.1009978   |           |            |
| ILMN_2262198 | 1     | 0.09993164  |           | PMS1CD7         | 1     | 0.09993164  |           |            |
| ILMN_1671054 | 1     | 0.09883058  |           | HLA-A           | 1     | 0.09883058  |           |            |
| ILMN_1664028 | 1     | 0.09789272  |           | CENPB           | 1     | 0.09789272  |           |            |
| ILMN_2299620 | 1     | 0.09611469  |           | KRCB            | 1     | 0.09611469  |           |            |
| ILMN_1780394 | 1     | 0.09574684  |           | FAM68A          | 1     | 0.09574684  |           |            |
| ILMN_2181598 | 1     | 0.09550485  |           | ILMN_2181598    | 1     | 0.09550485  |           |            |
| ILMN_1663313 | 1     | 0.09360339  |           | MYA1            | 1     | 0.09360339  |           |            |
| ILMN_3238375 | 1     | 0.09230526  |           | CENPT           | 1     | 0.09230526  |           |            |
| ILMN_2380163 | 1     | 0.0909466   |           | PIPRF           | 1     | 0.0909466   |           |            |
| ILMN_3085050 | 1     | 0.08842898  |           | CLP48           | 1     | 0.08842898  |           |            |
| ILMN_3241698 | 1     | 0.08749681  |           | DNF1B1          | 1     | 0.08749681  |           |            |
| ILMN_1803277 | 1     | 0.08256704  |           | MVP             | 1     | 0.08256704  |           |            |
| ILMN_1774074 | 1     | 0.07998818  |           | RXR8            | 1     | 0.07998818  |           |            |
| ILMN_2378952 | 1     | 0.07983345  |           | GPX4            | 1     | 0.07983345  |           |            |
| ILMN_1675460 | 1     | 0.07909625  |           | RLP29           | 1     | 0.07909625  |           |            |
| ILMN_1760778 | 1     | 0.07778025  |           | ENG             | 1     | 0.07778025  |           |            |
| ILMN_2382195 | 1     | 0.07733316  |           | PRKD2           | 1     | 0.07733316  |           |            |
| ILMN_1802251 | 1     | 0.07573612  |           | PTPIP1          | 1     | 0.07573612  |           |            |
| ILMN_1778684 | 1     | 0.07548634  |           | BRE             | 1     | 0.07548634  |           |            |
| ILMN_3297317 | 1     | 0.07479084  |           | RPL13AP5        | 1     | 0.07479084  |           |            |
| ILMN_1723895 | 1     | 0.07438165  |           | GTFC3C          | 1     | 0.07438165  |           |            |
| ILMN_1726782 | 1     | 0.07382066  |           | IFB2B1          | 1     | 0.07382066  |           |            |
| ILMN_1703593 | 1     | 0.07323559  |           | BAIAP2L1        | 1     | 0.07323559  |           |            |
| ILMN_3204734 | 1     | 0.070771166 |           | PLR8            | 1     | 0.070771166 |           |            |
| ILMN_1800425 | 1     | 0.06943557  |           | SLC9A1          | 1     | 0.06943557  |           |            |
| ILMN_1815057 | 1     | 0.06933548  |           | PGCPRB          | 1     | 0.06933548  |           |            |
| ILMN_1688441 | 1     | 0.06821779  |           | NCAPD3          | 1     | 0.06821779  |           |            |
| ILMN_1781281 | 1     | 0.06792355  |           | SRD1            | 1     | 0.06792355  |           |            |
| ILMN_2173712 | 1     | 0.06759502  |           | NDF1FA11        | 1     | 0.06759502  |           |            |
| ILMN_1740429 | 1     | 0.06652256  |           | FTL             | 1     | 0.06652256  |           |            |
| ILMN_2112673 | 1     | 0.0662358   |           | POTEK           | 1     | 0.0662358   |           |            |
| ILMN_2109489 | 1     | 0.06494782  |           | GZMB            | 1     | 0.06494782  |           |            |
| ILMN_3195401 | 1     | 0.06453998  |           | GABP1           | 1     | 0.06453998  |           |            |
| ILMN_1789195 | 1     | 0.06382066  |           | RFB1            | 1     | 0.06382066  |           |            |
| ILMN_3195263 | 1     | 0.06353693  |           | RLP17           | 1     | 0.06353693  |           |            |
| ILMN_1674608 | 1     | 0.0616988   |           | FAM1698         | 1     | 0.0616988   |           |            |
| ILMN_1726990 | 1     | 0.06139976  |           | DOM3Z           | 1     | 0.06139976  |           |            |
| ILMN_1760858 | 1     | 0.05252433  |           | RAB8A           | 1     | 0.05252433  |           |            |
| ILMN_1811104 | 1     | 0.05224441  |           | MDSR            | 1     | 0.05224441  |           |            |
| ILMN_1655987 | 1     | 0.05203827  |           | STAB1           | 1     | 0.05203827  |           |            |
| ILMN_1719986 | 1     | 0.04946162  |           | PKIP1           | 1     | 0.04946162  |           |            |
| ILMN_1805999 | 1     | 0.04863137  |           | MYO1D           | 1     | 0.04863137  |           |            |
| ILMN_2348989 | 1     | 0.04826705  |           | CCT3            | 1     | 0.04826705  |           |            |
| ILMN_2151817 | 1     | 0.04805406  |           | PFN1            | 1     | 0.04805406  |           |            |
| ILMN_1779399 | 1     | 0.04760345  |           | SNRPA           | 1     | 0.04760345  |           |            |
| ILMN_1752929 | 1     | 0.04749523  |           | CTCFP1          | 1     | 0.04749523  |           |            |
| ILMN_3195203 | 1     | 0.04711346  |           | CLT1orf101      | 1     | 0.04711346  |           |            |
| ILMN_1655563 | 1     | 0.04629425  |           | CTF             | 1     | 0.04629425  |           |            |
| ILMN_1679482 | 1     | 0.04415773  |           | TUBA3C          | 1     | 0.04415773  |           |            |
| ILMN_1808777 | 1     | 0.04360272  |           | EH2D            | 1     | 0.04360272  |           |            |
| ILMN_1674768 | 1     | 0.04121978  |           | LOC751333       | 1     | 0.04121978  |           |            |
| ILMN_1665117 | 1     | 0.04021297  |           | CFP1B9          | 1     | 0.04021297  |           |            |
| ILMN_3200362 | 1     | 0.03898553  |           | NRP1            | 1     | 0.03898553  |           |            |
| ILMN_1795495 | 1     | 0.03843462  |           | ERC5C           | 1     | 0.03843462  |           |            |
| ILMN_1716056 | 1     | 0.03729544  |           | LMF2            | 1     | 0.03729544  |           |            |
| ILMN_1760185 | 1     | 0.03584876  |           | FRS1            | 1     | 0.03584876  |           |            |
| ILMN_1686664 | 1     | 0.03502977  |           | MT2A            | 1     | 0.03502977  |           |            |
| ILMN_1783909 | 1     | 0.0340899   |           | COL6A2          | 1     | 0.0340899   |           |            |
| ILMN_1776047 | 1     | 0.03397603  |           | HSP90ABP        | 1     | 0.03397603  |           |            |
| ILMN_1781623 | 1     | 0.03188699  |           | TEX264          | 1     | 0.03188699  |           |            |
| ILMN_1774466 | 1     | 0.03049068  |           | PCY2            | 1     | 0.03049068  |           |            |
| ILMN_1651703 | 1     | 0.02943929  |           | CTCFB           | 1     | 0.02943929  |           |            |
| ILMN_1712241 | 1     | 0.02882524  |           | CH2H            | 1     | 0.02882524  |           |            |
| ILMN_1680437 | 1     | 0.02822882  |           | FEF1G           | 1     | 0.02822882  |           |            |
| ILMN_3242330 | 1     | 0.02798498  |           | FAM65C          | 1     | 0.02798498  |           |            |
| ILMN_1741491 | 1     | 0.02625337  |           | ZNH1T1          | 1     | 0.02625337  |           |            |
| ILMN_2338448 | 1     | 0.02585529  |           | UBASH3A         | 1     | 0.02585529  |           |            |
| ILMN_1731293 | 1     | 0.02493061  |           | CTCFB           | 1     | 0.02493061  |           |            |
| ILMN_1722872 | 1     | 0.02359545  |           | MYH9            | 1     | 0.02359545  |           |            |
| ILMN_1670638 | 1     | 0.02351978  |           | PTPNC1          | 1     | 0.02351978  |           |            |
| ILMN_1809437 | 1     | 0.02329845  |           | RHBDD2          | 1     | 0.02329845  |           |            |
| ILMN_2232066 | 1     | 0.4006-02   | 9.10E-01  | BIOCARTA        | 1     | 0.4006-02   | 9.10E-01  |            |
| ILMN_1733746 | 1     | 0.4006-02   | 9.10E-01  | GOTERM_BP_FAT   | 1     | 0.4006-02   | 9.10E-01  |            |
| ILMN_1690793 | 1     | 0.4006-02   | 9.10E-01  | GOTERM_BP_FAT   | 1     | 0.4006-02   | 9.10E-01  |            |
| ILMN_3111800 | 1     | 0.4006-02   | 9.10E-01  | GOTERM_BP_FAT   | 1     | 0.4006-02   | 9.10E-01  |            |
| ILMN_2054271 | 1     | 0.4006-02   | 9.10E-01  | GOTERM_BP_FAT   | 1     | 0.4006-02   | 9.10E-01  |            |
| ILMN_1651535 | 1     | 0.4006-02   | 9.10E-01  | GOTERM_BP_FAT   | 1     | 0.4006-02   | 9.10E-01  |            |
| ILMN_1762095 | 1     | 0.4006-02   | 9.10E-01  | GOTERM_BP_FAT   | 1     | 0.4006-02   | 9.10E-01  |            |
| ILMN_1742901 | 1     | 0.4006-02   | 9.10E-01  | GOTERM_BP_FAT   | 1     | 0.4006-02   | 9.10E-01  |            |
| ILMN_1738867 | 1     | 0.4006-02   | 9.10E-01  | GOTERM_BP_FAT   | 1     | 0.4006-02   | 9.10E-01  |            |
| ILMN_308632  | 1     | 0.4006-02   | 9.10E-01  | GOTERM_BP_FAT   | 1     | 0.4006-02   | 9.10E-01  |            |
| ILMN_1777665 | 1     | 0.4006-02   | 9.10E-01  | GOTERM_BP_FAT   | 1     | 0.4006-02   | 9.10E-01  |            |
| ILMN_1730085 | 1     | 0.4006-02   | 9.10E-01  | GOTERM_BP_FAT   | 1     | 0.4006-02   | 9.10E-01  |            |
| ILMN_2128048 | 1     | 0.4006-02   | 9.10E-01  | GOTERM_BP_FAT   | 1     | 0.4006-02   | 9.10E-01  |            |
| ILMN_2426014 | 1     | 0.4006-02   | 9.10E-01  | GOTERM_BP_FAT   | 1     | 0.4006-02   | 9.10E-01  |            |
| ILMN_1903802 | 1     | 0.4006-02   | 9.10E-01  | GOTERM_BP_FAT   | 1     | 0.4006-02   | 9.10E-01  |            |
| ILMN_1685952 | 1     | 0.4006-02   | 9.10E-01  | GOTERM_BP_FAT   | 1     | 0.4006-02   | 9.10E-01  |            |
| ILMN_1874613 | 1     | 0.4006-02   | 9.10E-01  | GOTERM_BP_FAT   | 1     | 0.4006-02   | 9.10E-01  |            |
| ILMN_1801943 | 1     | 0.4006-02   | 9.10E-01  | GOTERM_BP_FAT   | 1     | 0.4006-02   | 9.10E-01  |            |
| ILMN_3240715 | 1     | 0.4006-02   | 9.10E-01  | GOTERM_BP_FAT   | 1     | 0.4006-02   | 9.10E-01  |            |
| ILMN_3246713 | 1     | 0.4006-02   | 9.10E-01  | GOTERM_BP_FAT   | 1     | 0.4006-02   | 9.10E-01  |            |
| ILMN_1969035 | 1     | 0.4006-02   | 9.10E-01  | GOTERM_BP_FAT   | 1     | 0.4006-02   | 9.10E-01  |            |
| ILMN_1700763 | 1     | 0.4006-02   | 9.10E-01  | GOTERM_BP_FAT   | 1     | 0.4006-02   | 9.10E-01  |            |
| ILMN_3255871 | 1     | 0.4006-02   | 9.10E-01  | GOTERM_BP_FAT   | 1     | 0.4006-02   | 9.10E-01  |            |
| ILMN_1790384 | 1     | 0.4006-02   | 9.10E-01  | GOTERM_BP_FAT   | 1     | 0.4006-02   | 9.10E-01  |            |
| ILMN_3221072 | 1     | 0.4006-02   | 9.10E-01  | GOTERM_BP_FAT   | 1     | 0.4006-02   | 9.10E-01  |            |
| ILMN_325891  | 1     | 0.4006-02   | 9.10E-01  | GOTERM_BP_FAT   | 1     | 0.4006-02   | 9.10E-01  |            |
| ILMN_3207615 | 1     | 0.4006-02   | 9.10E-01  | GOTERM_BP_FAT   | 1     | 0.4006-02   | 9.10E-01  |            |
| ILMN_3240646 | 1     | 0.4006-02   | 9.10E-01  | GOTERM_BP_FAT   | 1     | 0.4006-02   | 9.10E-01  |            |
| ILMN_1742352 | 1     | 0.4006-02   | 9.10E-01  | GOTERM_BP_FAT   | 1     | 0.4006-02   | 9.10E-01  |            |
| ILMN_1749996 | 1     | 0.4006-02   | 9.10E-01  | GOTERM_BP_FAT   | 1     | 0.4006-02   | 9.10E-01  |            |
| ILMN_1728746 | 1     | 0.4006-02   | 9.10E-01  | GOTERM_BP_FAT   | 1     | 0.4006-02   | 9.10E-01  |            |
| ILMN_3212146 | 1     | 0.4006-02   | 9.10E-01  |                 |       |             |           |            |

| Gene                        | Enrichment Score: 1 | Count | P-Value     | Benjamini |
|-----------------------------|---------------------|-------|-------------|-----------|
| ILMN_1778561 WEE1           | 0.702204115         | 5     | 1.00E-01    | 7.90E-01  |
| ILMN_1767556 C10orf10       | 0.702001648         | 5     | 1.00E-01    | 7.90E-01  |
| ILMN_2329396 UQCRRH         | 0.702003915         | 5     | 1.00E-01    | 7.90E-01  |
| ILMN_1732971 HA             | 0.701961841         | 5     | 1.00E-01    | 7.90E-01  |
| ILMN_1736500 GNR2L3         | 0.701788952         | 5     | 1.00E-01    | 7.90E-01  |
| ILMN_1668090 SKZL5          | 0.701760846         | 5     | 1.00E-01    | 7.90E-01  |
| ILMN_3302356 RPS14          | 0.701685109         | 5     | 1.00E-01    | 7.90E-01  |
| ILMN_1793936 MED12          | 0.701490529         | 5     | 1.00E-01    | 7.90E-01  |
| ILMN_2359393 ULR8A          | 0.701410093         | 5     | 1.00E-01    | 7.90E-01  |
| ILMN_1668107 CND3           | 0.701203237         | 5     | 1.00E-01    | 7.90E-01  |
| ILMN_1687358 TMPRSS4        | 0.701282818         | 5     | 1.00E-01    | 7.90E-01  |
| ILMN_1707901 DHR87B         | 0.701250343         | 5     | 1.00E-01    | 7.90E-01  |
| ILMN_2149566 VPS25          | 0.701213327         | 5     | 1.00E-01    | 7.90E-01  |
| ILMN_1766110 PHF6           | 0.701128861         | 5     | 1.00E-01    | 7.90E-01  |
| ILMN_1775008 NCARD2         | 0.701063554         | 5     | 1.00E-01    | 7.90E-01  |
| ILMN_1844602 FOXO3          | 0.701030719         | 5     | 1.00E-01    | 7.90E-01  |
| ILMN_1787511 NED08          | 0.700991872         | 5     | 1.00E-01    | 7.90E-01  |
| ILMN_2111229 BZRAP1         | 0.700964056         | 5     | 1.30E-01    | 7.50E-01  |
| ILMN_2408576 FAM129B        | 0.700926326         | 5     | 1.30E-01    | 7.60E-01  |
| ILMN_1796900 NUDCD3         | 0.700843556         | 5     | 1.60E-01    | 8.20E-01  |
| ILMN_1704385 H3F3A          | 0.700745281         | 5     | 1.80E-01    | 8.40E-01  |
| ILMN_1746604 IL6ST          | 0.700734475         | 5     | 1.80E-01    | 8.40E-01  |
| ILMN_1653165 AAMP           | 0.700502268         | 5     | 2.30E-01    | 8.90E-01  |
| ILMN_1739640 DCH51          | 0.700418729         | 5     | 2.50E-01    | 9.10E-01  |
| ILMN_1813314 HIST1H2BK      | 0.700388564         | 5     | 3.90E-01    | 9.70E-01  |
| ILMN_2258816 SAMD3          | 0.700323247         | 5     | 7.10E-01    | 1.00E+00  |
| ILMN_3245236 FBRS           | 0.70027578          | 5     | 7.10E-01    | 1.00E+00  |
| ILMN_1695827 PIPICA         | 0.700221237         | 5     | 8.150E-02   | 2.50E-01  |
| ILMN_1804705 DKFZ680G016217 | 0.700190915         | 5     | 7.30E-02    | 3.80E-01  |
| ILMN_2119535 RPK1           | 0.700166642         | 5     | 7.310E-02   | 3.80E-01  |
| ILMN_1685122 COL9A2         | 0.699841767         | 5     | 8.310E-02   | 3.90E-01  |
| ILMN_2375599 RHN11          | 0.699728564         | 5     | 6.500E-02   | 4.90E-01  |
| ILMN_1769191 GNAS           | 0.699673301         | 5     | 7.700E-02   | 6.00E-01  |
| ILMN_1739283 UPF2           | 0.699590078         | 5     | 7.100E-02   | 6.90E-01  |
| ILMN_1740749 RPL7A          | 0.699579158         | 5     | 7.100E-02   | 7.00E-01  |
| ILMN_1740345 SKTS           | 0.699281098         | 5     | 14.210E-01  | 8.70E-01  |
| ILMN_1653599 ATP5D          | 0.699201793         | 5     | 10.350E-01  | 9.60E-01  |
| ILMN_1696485 HNRNPAB        | 0.699164936         | 5     | 10.350E-01  | 9.60E-01  |
| ILMN_1797556 SNAP47         | 0.698941458         | 5     | 9.360E-01   | 9.60E-01  |
| ILMN_1745994 GAS7           | 0.698884156         | 5     | 11.390E-01  | 9.70E-01  |
| ILMN_2332990 DIABLO         | 0.698787669         | 5     | 4.450E-01   | 9.90E-01  |
| ILMN_1778941 HNF1B          | 0.698762754         | 5     | 4.450E-01   | 9.90E-01  |
| ILMN_1669772 LRP1           | 0.698634053         | 5     | 27.110E-02  | 1.20E-01  |
| ILMN_2377025 TCF01          | 0.698620488         | 5     | 29.290E-02  | 2.50E-01  |
| ILMN_2154287 ACC5           | 0.698553776         | 5     | 11.880E-02  | 4.70E-01  |
| ILMN_2098126 ACCL5          | 0.698199295         | 5     | 10.110E-01  | 5.10E-01  |
| ILMN_1734546 AC29972        | 0.698035655         | 5     | 10.110E-01  | 5.10E-01  |
| ILMN_1682818 RPK1           | 0.697980044         | 5     | 5.100E-01   | 5.00E-01  |
| ILMN_1656720 PTPN11         | 0.69796538          | 5     | 7.220E-01   | 8.80E-01  |
| ILMN_1807734 ZNF700         | 0.697893954         | 5     | 12.230E-01  | 7.10E-01  |
| ILMN_1735467 NRP1L2         | 0.697891101         | 5     | 5.240E-01   | 1.00E+00  |
| ILMN_1718303 PVR12          | 0.697817979         | 5     | 5.250E-01   | 9.40E-01  |
| ILMN_1658674 UBXN6          | 0.697734632         | 5     | 5.250E-01   | 9.40E-01  |
| ILMN_1692742 DENND3         | 0.697137203         | 5     | 8.000E-02   | 9.50E-01  |
| ILMN_1663416 RPL17          | 0.696919711         | 5     | 3.120E-01   | 9.80E-01  |
| ILMN_2330213 CUX1           | 0.696826757         | 5     | 3.140E-01   | 1.00E+00  |
| ILMN_1700249 ADC8A          | 0.696805558         | 5     | 1.00E-01    | 5.00E-01  |
| ILMN_2329387 CSD3           | 0.696712503         | 5     | 42.530E-02  | 3.00E-01  |
| ILMN_1678547 CPN9           | 0.696617386         | 5     | 29.360E-02  | 2.00E-01  |
| ILMN_1806242 PSD            | 0.696603884         | 5     | 8.630E-02   | 1.00E+00  |
| ILMN_1719449 DLX2           | 0.69646375          | 5     | 26.640E-02  | 1.00E+00  |
| ILMN_1779735 C7orf59        | 0.696429547         | 5     | 26.640E-02  | 1.00E+00  |
| ILMN_1798831 HNF31          | 0.696393903         | 5     | 24.630E-02  | 1.00E+00  |
| ILMN_1658486 MRP54          | 0.696359015         | 5     | 18.740E-02  | 1.00E+00  |
| ILMN_1718900 KCTD2          | 0.696252633         | 5     | 21.960E-02  | 9.60E-01  |
| ILMN_1764383 MCOLN1         | 0.69619835          | 5     | 21.120E-01  | 9.80E-01  |
| ILMN_1714159 LUZP1          | 0.696176582         | 5     | 21.130E-01  | 8.10E-01  |
| ILMN_1738132 HXK1           | 0.696158559         | 5     | 17.190E-01  | 9.90E-01  |
| ILMN_1658487 ABP4           | 0.69615627          | 5     | 10.230E-01  | 1.00E+00  |
| ILMN_1800901 RARBES1        | 0.696141806         | 5     | 11.310E-01  | 1.00E+00  |
| ILMN_2331501 UBC            | 0.696126166         | 5     | 8.360E-01   | 1.00E+00  |
| ILMN_2197128 OSR1           | 0.695965019         | 5     | 11.440E-01  | 1.00E+00  |
| ILMN_1674780 SF3B1          | 0.695839994         | 5     | 11.440E-01  | 1.00E+00  |
| ILMN_2347768 MNX2           | 0.695789016         | 5     | 122.300E-02 | 3.80E-01  |
| ILMN_2326786 HNRP14         | 0.695755647         | 5     | 113.340E-02 | 3.00E-01  |
| ILMN_1804789 ALX1967        | 0.695735962         | 5     | 47.530E-02  | 5.10E-01  |
| ILMN_1708093 ARHGFS         | 0.69559438          | 5     | 96.680E-02  | 5.70E-01  |
| ILMN_3241051 RPL32          | 0.695439706         | 5     | 91.100E-01  | 6.90E-01  |
| ILMN_1683609 UBA1           | 0.69538271          | 5     | 91.110E-01  | 7.10E-01  |
| ILMN_1729894 PA2G4          | 0.695330849         | 5     | 85.160E-01  | 8.10E-01  |
| ILMN_1653165 RHO2           | 0.695278567         | 5     | 85.160E-01  | 8.10E-01  |
| ILMN_2315560 NTA1           | 0.695197857         | 5     | 144.370E-01 | 9.60E-01  |
| ILMN_2348090 MRP155         | 0.695190001         | 5     | 60.650E-01  | 9.50E-01  |
| ILMN_1734353 GPX4           | 0.695187585         | 5     | 60.650E-01  | 9.50E-01  |
| ILMN_1682792 BVS1           | 0.695098912         | 5     | 32.120E-02  | 2.20E-01  |
| ILMN_1795218 DHX30          | 0.694982487         | 5     | 32.140E-02  | 2.40E-01  |
| ILMN_1704799 RRM3           | 0.694978262         | 5     | 41.150E-02  | 3.00E-01  |
| ILMN_1699980 TSPAN1         | 0.694722499         | 5     | 25.150E-01  | 7.90E-01  |
| ILMN_1726410 APTT           | 0.694656504         | 5     | 15.270E-01  | 9.20E-01  |
| ILMN_2232368 PCF1           | 0.694554088         | 5     | 14.340E-01  | 9.50E-01  |
| ILMN_1796409 C10B           | 0.694507802         | 5     | 20.360E-01  | 9.60E-01  |

| Gene                      | Enrichment Score: 1 | Count | P-Value    | Benjamini |
|---------------------------|---------------------|-------|------------|-----------|
| ILMN_1656170 JAKMIP1      | -0.443505301        | 5     | 1.00E-01   | 7.90E-01  |
| ILMN_1704790 FAD5G        | -0.443508534        | 5     | 1.00E-01   | 7.90E-01  |
| ILMN_2248955 XCL1         | -0.443523663        | 5     | 6.80E-03   | 1.50E-01  |
| ILMN_2051663 HIGD3B       | -0.443528473        | 5     | 9.90E-03   | 2.00E-01  |
| ILMN_2310703 RPS26        | -0.443519728        | 5     | 24.370E-02 | 4.20E-01  |
| ILMN_1686557 TIMM13       | -0.443509721        | 5     | 19.500E-02 | 4.20E-01  |
| ILMN_1792088 C1orf101     | -0.443596714        | 5     | 28.120E-01 | 8.30E-01  |
| ILMN_1679232 KIDINS220    | -0.443638681        | 5     | 24.180E-01 | 8.90E-01  |
| ILMN_2399673 POW121C      | -0.443648152        | 5     | 30.280E-01 | 9.60E-01  |
| ILMN_1677203 C6orf42      | -0.443629516        | 5     | 23.450E-01 | 7.20E-01  |
| ILMN_1731639 CASP3        | -0.443927045        | 5     | 31.510E-01 | 9.00E-01  |
| ILMN_2347979 LOC100132024 | -0.44402494         | 5     | 60.650E-01 | 9.50E-01  |
| ILMN_3307252 STMN1        | -0.444058039        | 5     | 7.900E-03  | 1.90E-01  |
| ILMN_2134147 CRYG         | -0.444089503        | 5     | 13.970E-03 | 1.90E-01  |
| ILMN_1736340 ANGL2        | -0.444100488        | 5     | 9.360E-02  | 4.20E-01  |
| ILMN_1699858 FBP1         | -0.444029621        | 5     | 9.360E-02  | 4.20E-01  |
| ILMN_1771212 LOC100127910 | -0.444032694        | 5     | 7.490E-02  | 4.90E-01  |
| ILMN_1804005 FBP2         | -0.444370216        | 5     | 1.30E-01   | 7.50E-01  |
| ILMN_2112942 KRTPA6-1     | -0.444499187        | 5     | 3.130E-01  | 7.60E-01  |
| ILMN_1719089 EXO1         | -0.444520538        | 5     | 9.160E-01  | 8.20E-01  |
| ILMN_1658563 KR740        | -0.444536418        | 5     | 3.180E-01  | 8.40E-01  |
| ILMN_2349059 TRG11        | -0.444563112        | 5     | 3.180E-01  | 8.40E-01  |
| ILMN_3309159 MIR1998      | -0.444574744        | 5     | 3.280E-01  | 8.90E-01  |
| ILMN_2243487 CDO1         | -0.444585051        | 5     | 6.250E-01  | 9.10E-01  |
| ILMN_1672843 FBX08        | -0.444601413        | 5     | 3.390E-01  | 9.70E-01  |
| ILMN_3309754 DNM3OS       | -0.444611257        | 5     | 3.710E-01  | 1.00E+00  |
| ILMN_1688160 WOR27        | -0.444630754        | 5     | 1.800E-02  | 2.50E-01  |
| ILMN_1681203 TW1F1        | -0.444658451        | 5     | 7.300E-02  | 3.80E-01  |
| ILMN_1657305 LOC283780    | -0.444681556        | 5     | 7.310E-02  | 3.80E-01  |
| ILMN_1657603 AGLB1        | -0.444687196        | 5     | 7.310E-02  | 3.80E-01  |
| ILMN_1703091 C2orf278     | -0.444772714        | 5     | 7.310E-02  | 3.80E-01  |
| ILMN_1747696 TPM3         | -0.444770424        | 5     | 6.500E-02  | 4.90E-01  |
| ILMN_1658548 LOC401180    | -0.444803037        | 5     | 7.100E-02  | 6.00E-01  |
| ILMN_1690423 SC2CR44      | -0.444876832        | 5     | 7.100E-02  | 6.00E-01  |
| ILMN_1690758 BATF1202     | -0.444902895        | 5     | 7.300E-02  | 7.00E-01  |
| ILMN_1813325 PDE11A       | -0.444921785        | 5     | 14.210E-01 | 8.70E-01  |
| ILMN_1899048 AW295241     | -0.44492497         | 5     | 10.350E-01 | 9.60E-01  |
| ILMN_1800164 PPIA1        | -0.444938026        | 5     | 10.350E-01 | 9.60E-01  |
| ILMN_1729179 SPATSL1      | -0.4450094          | 5     | 9.360E-01  | 9.60E-01  |
| ILMN_1715376 LRR1Q3       | -0.44511096         | 5     | 11.390E-01 | 9.70E-01  |
| ILMN_1805180 CDAN1        | -0.445112719        | 5     | 4.450E-01  | 9.90E-01  |
| ILMN_1796926 PABPC5       | -0.445300428        | 5     | 4.450E-01  | 9.90E-01  |
| ILMN_1701831 GSTA1        | -0.445338498        | 5     | 27.110E-02 | 1.20E-01  |
| ILMN_3214579 LOC100131733 | -0.445371657        | 5     | 29.290E-02 | 2.50E-01  |
| ILMN_1750818 LAT          | -0.445436292        | 5     | 11.880E-02 | 4.70E-01  |
| ILMN_1748281 MAPK10       | -0.445464811        | 5     | 10.110E-01 | 5.10E-01  |
| ILMN_1716600 SBRP3        | -0.445554573        | 5     | 10.110E-01 | 5.10E-01  |
| ILMN_1710312 TMEM31       | -0.445696649        | 5     | 5.100E-01  | 5.00E-01  |
| ILMN_1877939 BX10906      | -0.445879268        | 5     | 7.220E-01  | 8.80E-01  |
| ILMN_1657870 AB12         | -0.445957138        | 5     | 12.230E-01 | 7.10E-01  |
| ILMN_2304975 LOC201651    | -0.446074298        | 5     | 5.240E-01  | 1.00E+00  |
| ILMN_1803676 ENOSF1       | -0.446170381        | 5     | 5.250E-01  | 9.40E-01  |
| ILMN_3270641 HNNPH3       | -0.446179172        | 5     | 5.250E-01  | 9.40E-01  |
| ILMN_1757183 LOC100192378 | -0.446223234        | 5     | 8.000E-02  | 9.50E-01  |
| ILMN_1814353 ARGF2P2      | -0.446301019        | 5     | 3.120E-01  | 9.80E-01  |
| ILMN_1692674 NKD1         | -0.446349667        | 5     | 3.140E-01  | 1.00E+00  |
| ILMN_2083595 BC132841     | -0.446391702        | 5     | 1.00E-01   | 5.00E-01  |
| ILMN_1693766 CEP135       | -0.446438724        | 5     | 42.530E-02 | 3.00E-01  |
| ILMN_2253286 PRKXC        | -0.446477273        | 5     | 29.360E-02 | 2.00E-01  |
| ILMN_2191541 PTPRK        | -0.446495565        | 5     | 8.630E-02  | 1.00E+00  |
| ILMN_1748141 AMOTL1       | -0.446496285        | 5     | 26.640E-02 | 1.00E+00  |



| Gene         | Accession       | Score       | Category               | Description                                                                              | Count | P-Value  | Benjamini |
|--------------|-----------------|-------------|------------------------|------------------------------------------------------------------------------------------|-------|----------|-----------|
| ILMN_1775111 | SN01            | 0.686717255 | INTERPRO               | <a href="#">Galactin, carbohydrate recognition domain</a>                                | 4     | 2.90E-01 | 1.00E+00  |
| ILMN_2113333 | LGAL598         | 0.686662288 | SMART                  | <a href="#">GLCT</a>                                                                     | 4     | 3.20E-01 | 9.50E-01  |
| ILMN_1773747 | CARD14          | 0.686631498 | Annotation Cluster 129 | Enrichment Score: 0.9                                                                    | Count | P-Value  | Benjamini |
| ILMN_2411723 | RP5A            | 0.686630857 | SP_PIR_KEYWORDS        | <a href="#">Aminocycl-1RNA synthetase</a>                                                | 10    | 3.00E-02 | 2.50E-01  |
| ILMN_1671977 | URE2L3          | 0.686490093 | GOTERM_MF_FAT          | <a href="#">ligase activity, forming carbon-oxygen bonds</a>                             | 11    | 7.20E-02 | 7.00E-01  |
| ILMN_1745242 | PLSCR1          | 0.686490004 | GOTERM_MF_FAT          | <a href="#">ligase activity, forming aminocycl-1RNA and related compounds</a>            | 11    | 7.20E-02 | 7.00E-01  |
| ILMN_1785636 | COX6A1          | 0.686461705 | GOTERM_BP_FAT          | <a href="#">aminocycl-1RNA ligase activity</a>                                           | 11    | 7.20E-02 | 7.00E-01  |
| ILMN_1742060 | CTD10           | 0.686439965 | GOTERM_BP_FAT          | <a href="#">RNA-acid sulfate endoribonuclease activity</a>                               | 11    | 7.30E-02 | 6.00E-01  |
| ILMN_1663379 | FXR1L5          | 0.686314752 | GOTERM_BP_FAT          | <a href="#">RNA-acylation for protein translation</a>                                    | 11    | 7.30E-02 | 6.00E-01  |
| ILMN_1771447 | ZNF833P         | 0.686283476 | GOTERM_BP_FAT          | <a href="#">RNA-acylation</a>                                                            | 11    | 7.30E-02 | 6.00E-01  |
| ILMN_2340027 | TSPAN4          | 0.686245124 | UP_SEQ_FEATURE         | short sequence motif "KMSIK" region                                                      | 5     | 1.20E-01 | 1.00E+00  |
| ILMN_1670037 | POLR2L          | 0.686214165 | KEGG_PATHWAY           | <a href="#">Aminoacyl-tRNA biosynthesis</a>                                              | 10    | 1.50E-01 | 5.00E-01  |
| ILMN_1679401 | TRPM4           | 0.686131347 | UP_SEQ_FEATURE         | short sequence motif "HIGH" region                                                       | 5     | 1.70E-01 | 1.00E+00  |
| ILMN_1683447 | RPL35           | 0.685977161 | INTERPRO               | <a href="#">Rossmann-like alpha-beta/alpha sandwich fold</a>                             | 8     | 2.30E-01 | 1.00E+00  |
| ILMN_1652464 | TUBA3E          | 0.685911112 | GOTERM_BP_FAT          | <a href="#">tRNA metabolic process</a>                                                   | 19    | 2.90E-01 | 9.30E-01  |
| ILMN_2412024 | MDM6            | 0.685735586 | INTERPRO               | <a href="#">Aminocycl-1RNA synthetase, class II, conserved region</a>                    | 5     | 6.40E-01 | 1.00E+00  |
| ILMN_1656265 | GPATCH1         | 0.685722948 | INTERPRO               | <a href="#">Aminocycl-1RNA synthetase, class I, conserved site</a>                       | 5     | 6.40E-01 | 1.00E+00  |
| ILMN_2391765 | G6orf48         | 0.685655911 | Annotation Cluster 130 | Enrichment Score: 0.89                                                                   | Count | P-Value  | Benjamini |
| ILMN_2334193 | SLC22A2         | 0.685628417 | INTERPRO               | <a href="#">Protein kinase C-like, phorbol ester/diacylglycerol binding</a>              | 15    | 3.80E-02 | 9.10E-01  |
| ILMN_1795286 | G6orf47         | 0.685560508 | SMART                  | <a href="#">C1</a>                                                                       | 15    | 5.20E-02 | 7.40E-01  |
| ILMN_1708534 | PAM8            | 0.685397814 | INTERPRO               | <a href="#">Protein kinase C-phorbol ester/diacylglycerol binding</a>                    | 11    | 9.20E-02 | 9.60E-01  |
| ILMN_2221830 | PL14340         | 0.685318058 | GOTERM_MF_FAT          | <a href="#">divalent metal binding</a>                                                   | 11    | 9.30E-02 | 2.50E-01  |
| ILMN_1815734 | FCHD2           | 0.685305967 | UP_SEQ_FEATURE         | zinc finger region-Phorbol-ester/DAG-type 2                                              | 8     | 2.60E-01 | 1.00E+00  |
| ILMN_1813604 | NUDF8F          | 0.685281181 | UP_SEQ_FEATURE         | zinc finger region-Phorbol-ester/DAG-type 2                                              | 5     | 2.70E-01 | 1.00E+00  |
| ILMN_1749579 | PKH01           | 0.685128982 | UP_SEQ_FEATURE         | zinc finger region-Phorbol-ester/DAG-type 1                                              | 5     | 2.70E-01 | 1.00E+00  |
| ILMN_2370872 | GRIN4           | 0.685109859 | Annotation Cluster 131 | Enrichment Score: 0.89                                                                   | Count | P-Value  | Benjamini |
| ILMN_1763000 | ADP4            | 0.685053322 | UP_SEQ_FEATURE         | glycosylation site-O-linked (Xyl...)(glycosaminoglycan)                                  | 5     | 7.90E-02 | 1.00E+00  |
| ILMN_1751302 | SP_PIR_KEYWORDS | 0.685029058 | UP_SEQ_FEATURE         | <a href="#">Armadillo-like helical</a>                                                   | 5     | 7.90E-02 | 1.00E+00  |
| ILMN_1759014 | KLF6            | 0.684850944 | SP_PIR_KEYWORDS        | <a href="#">Armadillo-like helical</a>                                                   | 10    | 2.00E-01 | 6.30E-01  |
| ILMN_1810577 | RP5AX           | 0.684811427 | Annotation Cluster 132 | Enrichment Score: 0.89                                                                   | Count | P-Value  | Benjamini |
| ILMN_1791067 | TESK1           | 0.684715357 | GOTERM_BP_FAT          | <a href="#">positive regulation of MAPKKK cascade</a>                                    | 11    | 9.30E-02 | 6.60E-01  |
| ILMN_1803686 | ADA             | 0.684715039 | GOTERM_BP_FAT          | <a href="#">positive regulation of stress-activated protein kinase signaling pathway</a> | 6     | 1.30E-01 | 7.60E-01  |
| ILMN_1702592 | WDK73           | 0.684679673 | GOTERM_BP_FAT          | <a href="#">positive regulation of JNK cascade</a>                                       | 5     | 1.80E-01 | 8.30E-01  |
| ILMN_2317923 | TMEM132A        | 0.684677645 | Annotation Cluster 133 | Enrichment Score: 0.88                                                                   | Count | P-Value  | Benjamini |
| ILMN_1746588 | TALD01          | 0.684628684 | INTERPRO               | <a href="#">Histone H3</a>                                                               | 3     | 1.20E-01 | 9.80E-01  |
| ILMN_1705733 | RPN202          | 0.684532078 | SMART                  | <a href="#">H3</a>                                                                       | 3     | 1.30E-01 | 1.0E+01   |
| ILMN_2050112 | RP5A            | 0.684482304 | PIR_SUPERFAMILY        | <a href="#">PIR5FOF0205:histone H3</a>                                                   | 3     | 1.40E-01 | 1.00E+00  |
| ILMN_1770936 | HAD10Y1         | 0.684452056 | Annotation Cluster 134 | Enrichment Score: 0.88                                                                   | Count | P-Value  | Benjamini |
| ILMN_3191596 | STAGL2          | 0.684346439 | UP_SEQ_FEATURE         | repeat:HEAT 3                                                                            | 12    | 3.40E-02 | 9.90E-01  |
| ILMN_1651958 | MGP             | 0.684329929 | INTERPRO               | <a href="#">Armadillo-like helical</a>                                                   | 24    | 5.00E-02 | 9.20E-01  |
| ILMN_1785161 | CHCHD6          | 0.684313981 | UP_SEQ_FEATURE         | repeat:HEAT 7                                                                            | 7     | 6.20E-02 | 1.00E+00  |
| ILMN_1770719 | XIAO664         | 0.684275455 | UP_SEQ_FEATURE         | repeat:HEAT 8                                                                            | 6     | 7.10E-02 | 1.00E+00  |
| ILMN_2116734 | SLC39A1         | 0.684062935 | INTERPRO               | <a href="#">HEAT</a>                                                                     | 12    | 8.00E-02 | 9.60E-01  |
| ILMN_1737081 | PCPN1           | 0.683931871 | UP_SEQ_FEATURE         | repeat:HEAT 2                                                                            | 12    | 8.00E-02 | 1.00E+00  |
| ILMN_1820760 | PLP4            | 0.683759877 | UP_SEQ_FEATURE         | repeat:HEAT 1                                                                            | 12    | 8.00E-02 | 1.00E+00  |
| ILMN_1666670 | RBX1            | 0.683743884 | UP_SEQ_FEATURE         | repeat:HEAT 5                                                                            | 8     | 1.20E-01 | 1.00E+00  |
| ILMN_2359453 | ERGIC3          | 0.683666081 | UP_SEQ_FEATURE         | repeat:HEAT 4                                                                            | 9     | 1.40E-01 | 1.00E+00  |
| ILMN_1664922 | FLNB            | 0.683633582 | UP_SEQ_FEATURE         | repeat:HEAT 5                                                                            | 7     | 1.50E-01 | 1.00E+00  |
| ILMN_1755850 | ZNF550          | 0.683521295 | UP_SEQ_FEATURE         | domain:importin N-terminal                                                               | 4     | 2.40E-01 | 1.00E+00  |
| ILMN_2121975 | VF1A            | 0.683513172 | UP_SEQ_FEATURE         | repeat:HEAT 9                                                                            | 4     | 2.40E-01 | 1.00E+00  |
| ILMN_1795918 | AGAP3           | 0.683504337 | UP_SEQ_FEATURE         | repeat:HEAT 10                                                                           | 4     | 2.70E-01 | 1.00E+00  |
| ILMN_1811063 | RPL29           | 0.683283692 | INTERPRO               | <a href="#">importin-beta, N-terminal</a>                                                | 4     | 2.90E-01 | 1.00E+00  |
| ILMN_1750100 | TUBB8           | 0.683042307 | UP_SEQ_FEATURE         | repeat:HEAT 11                                                                           | 3     | 3.90E-01 | 1.00E+00  |
| ILMN_1683700 | TNFSF13         | 0.683012708 | GOTERM_BP_FAT          | <a href="#">protein import into nucleus, docking</a>                                     | 4     | 3.90E-01 | 9.70E-01  |
| ILMN_1706960 | VAT1            | 0.682955044 | Annotation Cluster 135 | Enrichment Score: 0.88                                                                   | Count | P-Value  | Benjamini |
| ILMN_2306265 | CS54F44         | 0.682931494 | GOTERM_CC_FAT          | <a href="#">organelle membrane</a>                                                       | 183   | 7.40E-04 | 1.70E-02  |
| ILMN_1671971 | KRT8            | 0.6829208   | GOTERM_CC_FAT          | <a href="#">organelle envelope</a>                                                       | 103   | 1.30E-02 | 1.60E-01  |
| ILMN_1733861 | ARHGFE11        | 0.682879575 | GOTERM_CC_FAT          | <a href="#">envelopes</a>                                                                | 103   | 1.50E-02 | 1.60E-01  |
| ILMN_1814823 | FTL             | 0.682873452 | GOTERM_CC_FAT          | <a href="#">organelle inner membrane</a>                                                 | 50    | 2.20E-01 | 7.00E-01  |
| ILMN_1796912 | ARHGFE7         | 0.682848631 | SP_PIR_KEYWORDS        | <a href="#">mitochondrion inner membrane</a>                                             | 27    | 3.00E-01 | 7.50E-01  |
| ILMN_1737576 | KASA1           | 0.682799539 | GOTERM_CC_FAT          | <a href="#">mitochondrial envelope</a>                                                   | 58    | 4.00E-01 | 9.00E-01  |
| ILMN_1710985 | RP5A            | 0.682731828 | SP_PIR_KEYWORDS        | <a href="#">mitochondrion</a>                                                            | 102   | 4.90E-01 | 8.90E-01  |
| ILMN_3238001 | LOC349114       | 0.682626267 | GOTERM_CC_FAT          | <a href="#">mitochondrial part</a>                                                       | 81    | 5.00E-01 | 9.20E-01  |
| ILMN_1775939 | SF3B2           | 0.682631349 | GOTERM_CC_FAT          | <a href="#">mitochondrial membrane</a>                                                   | 53    | 5.60E-01 | 9.40E-01  |
| ILMN_1751301 | FXYD2           | 0.682449405 | GOTERM_CC_FAT          | <a href="#">mitochondrial inner membrane</a>                                             | 41    | 5.80E-01 | 9.40E-01  |
| ILMN_1704294 | CDH3            | 0.682098062 | GOTERM_CC_FAT          | <a href="#">mitochondrion</a>                                                            | 144   | 5.90E-01 | 9.40E-01  |
| ILMN_1708029 | TMEM88          | 0.682072756 | Annotation Cluster 136 | Enrichment Score: 0.88                                                                   | Count | P-Value  | Benjamini |
| ILMN_232993  | IRIAD3          | 0.681931826 | GOTERM_BP_FAT          | <a href="#">natural killer cell mediated cytotoxicity</a>                                | 4     | 7.70E-02 | 1.10E-01  |
| ILMN_2288870 | CNSK1D          | 0.681829554 | GOTERM_BP_FAT          | <a href="#">natural killer cell mediated cytotoxicity</a>                                | 4     | 7.70E-02 | 6.10E-01  |
| ILMN_1716488 | PACS1           | 0.681747234 | GOTERM_BP_FAT          | <a href="#">leukocyte mediated cytotoxicity</a>                                          | 4     | 1.40E-01 | 7.70E-01  |
| ILMN_2405031 | TRIM24          | 0.681644452 | GOTERM_BP_FAT          | <a href="#">cell killing</a>                                                             | 5     | 3.90E-01 | 9.70E-01  |
| ILMN_1662409 | PRR13           | 0.681468652 | Annotation Cluster 137 | Enrichment Score: 0.85                                                                   | Count | P-Value  | Benjamini |
| ILMN_2165793 | NKA1A           | 0.681366286 | GOTERM_BP_FAT          | <a href="#">pentose phosphate pathway</a>                                                | 8     | 6.50E-02 | 3.40E-01  |
| ILMN_1664440 | PFS3BP1         | 0.681357576 | GOTERM_MF_FAT          | <a href="#">monooxygenase binding</a>                                                    | 9     | 1.30E-01 | 8.50E-01  |
| ILMN_1782403 | PRR11           | 0.681324401 | GOTERM_BP_FAT          | <a href="#">fructose metabolic process</a>                                               | 5     | 1.80E-01 | 8.30E-01  |
| ILMN_1676600 | SEC24C          | 0.681277727 | GOTERM_BP_FAT          | <a href="#">fructose 6-phosphate metabolic process</a>                                   | 3     | 2.30E-01 | 8.90E-01  |
| ILMN_1728197 | LMNS            | 0.68126484  | Annotation Cluster 138 | Enrichment Score: 0.84                                                                   | Count | P-Value  | Benjamini |
| ILMN_1696434 | LAMA1           | 0.681250869 | UP_SEQ_FEATURE         | <a href="#">domain:HEP</a>                                                               | 3     | 1.10E-01 | 1.00E+00  |
| ILMN_1720893 | CFR4            | 0.681179654 | INTERPRO               | <a href="#">EGF13-homology (Ftr)</a>                                                     | 4     | 1.90E-01 | 9.00E-01  |
| ILMN_1707631 | MED10           | 0.68102544  | SMART                  | <a href="#">Etr</a>                                                                      | 4     | 1.70E-01 | 8.70E-01  |
| ILMN_1701477 | CDC101          | 0.680989793 | Annotation Cluster 139 | Enrichment Score: 0.84                                                                   | Count | P-Value  | Benjamini |
| ILMN_1669215 | SRK2            | 0.680880702 | INTERPRO               | <a href="#">Calponin-like actin-binding</a>                                              | 18    | 5.30E-03 | 4.90E-01  |
| ILMN_1743755 | G6orf226        | 0.680831211 | SMART                  | <a href="#">CtH</a>                                                                      | 18    | 8.20E-03 | 3.80E-01  |
| ILMN_1720944 | YFC             | 0.680770855 | UP_SEQ_FEATURE         | <a href="#">domain:Actin-binding</a>                                                     | 7     | 2.70E-02 | 9.90E-01  |
| ILMN_1721500 | CTD             | 0.680729214 | UP_SEQ_FEATURE         | <a href="#">domain:CH 1</a>                                                              | 8     | 3.10E-02 | 9.00E-01  |
| ILMN_2388876 | TRF111          | 0.680518629 | UP_SEQ_FEATURE         | <a href="#">domain:CH 2</a>                                                              | 8     | 3.80E-02 | 9.90E-01  |
| ILMN_1704672 | ORF28           | 0.680479917 | UP_SEQ_FEATURE         | <a href="#">domain:CH 3</a>                                                              | 10    | 6.10E-02 | 1.00E+00  |
| ILMN_2399174 | TRAK1           | 0.680359331 | INTERPRO               | <a href="#">Actin-type, actin-binding, conserved site</a>                                | 7     | 6.10E-02 | 1.00E+00  |
| ILMN_1675124 | DDX17           | 0.68020088  | UP_SEQ_FEATURE         | repeat:Spectrin 4                                                                        | 6     | 1.00E-01 | 1.00E+00  |
| ILMN_1677532 | TARDBP          | 0.680100503 | INTERPRO               | <a href="#">Spectrin repeat</a>                                                          | 6     | 1.20E-01 | 9.70E-01  |
| ILMN_2102781 | ADRC2           | 0.680074013 | UP_SEQ_FEATURE         | repeat:Spectrin 3                                                                        | 5     | 1.70E-01 | 1.00E+00  |
| ILMN_1663145 | NOMO3           | 0.680036137 | UP_SEQ_FEATURE         | repeat:Spectrin 2                                                                        | 6     | 2.00E-01 | 1.00E+00  |
| ILMN_2234758 | SRP14           | 0.679989891 | UP_SEQ_FEATURE         | repeat:Spectrin 1                                                                        | 6     | 2.00E-01 | 1.00E+00  |
| ILMN_2092693 | LSM12           | 0.679857254 | UP_SEQ_FEATURE         | repeat:Spectrin 8                                                                        | 4     | 2.00E-01 | 1.00E+00  |

| Gene         | Accession      | Score        | Category               | Description                                                                                                                                                                          | Count | P-Value  | Benjamini |
|--------------|----------------|--------------|------------------------|--------------------------------------------------------------------------------------------------------------------------------------------------------------------------------------|-------|----------|-----------|
| ILMN_1858868 | BX09310        | -0.451331075 | GOTERM_MF_FAT          | <a href="#">protein kinase inhibitor activity</a>                                                                                                                                    | 6     | 3.40E-01 | 9.90E-01  |
| ILMN_1721277 | USP6           | -0.451404358 | GOTERM_MF_FAT          | <a href="#">kinase inhibitor activity</a>                                                                                                                                            | 6     | 3.60E-01 | 9.90E-01  |
| ILMN_2152828 | KIF18B         | -0.451493441 | GOTERM_MF_FAT          | <a href="#">kinase regulator activity</a>                                                                                                                                            | 11    | 3.60E-01 | 9.90E-01  |
| ILMN_2321851 | HSR1A1         | -0.451513311 | GOTERM_MF_FAT          | <a href="#">protein serine/threonine kinase inhibitor activity</a>                                                                                                                   | 3     | 3.40E-01 | 1.00E+00  |
| ILMN_2346451 | ACR3B          | -0.45152437  | Annotation Cluster 166 | Enrichment Score: 0.42                                                                                                                                                               | Count | P-Value  | Benjamini |
| ILMN_1664698 | UNC119         | -0.451559593 | GOTERM_BP_FAT          | <a href="#">telencephalon development</a>                                                                                                                                            | 10    | 2.50E-01 | 9.90E-01  |
| ILMN_1796813 | EED            | -0.451559871 | GOTERM_BP_FAT          | <a href="#">tubulin development</a>                                                                                                                                                  | 7     | 3.60E-01 | 1.00E+00  |
| ILMN_2339779 | ATP9B1E1       | -0.451558462 | GOTERM_BP_FAT          | <a href="#">tubulin development</a>                                                                                                                                                  | 4     | 4.20E-01 | 1.00E+00  |
| ILMN_1770245 | EPB41L5        | -0.451558555 | GOTERM_BP_FAT          | <a href="#">tubulin development</a>                                                                                                                                                  | 5     | 4.40E-01 | 1.00E+00  |
| ILMN_1804470 | C17orf109      | -0.451601199 | GOTERM_BP_FAT          | <a href="#">cerebellar cortex development</a>                                                                                                                                        | 5     | 4.70E-01 | 1.00E+00  |
| ILMN_2179533 | CA4            | -0.451608326 | Annotation Cluster 167 | Enrichment Score: 0.42                                                                                                                                                               | Count | P-Value  | Benjamini |
| ILMN_1839138 | BUG32831       | -0.451610381 | SP_PIR_KEYWORDS        | <a href="#">dioxigenase</a>                                                                                                                                                          | 10    | 2.50E-01 | 9.00E-01  |
| ILMN_1799423 | MPS14          | -0.451646238 | UP_SEQ_FEATURE         | <a href="#">metal ion-binding site:iron; catalytic oxidoreductase activity, acting on single donors with incorporation of molecular oxygen, incorporation of two atoms of oxygen</a> | 5     | 2.70E-01 | 1.00E+00  |
| ILMN_1663156 | DDX31          | -0.451662968 | GOTERM_MF_FAT          | <a href="#">oxidoreductase activity, acting on single donors with incorporation of molecular oxygen</a>                                                                              | 9     | 4.10E-01 | 1.00E+00  |
| ILMN_1718236 | LINC001-1908.1 | -0.451680163 | GOTERM_MF_FAT          | <a href="#">incorporation of molecular oxygen</a>                                                                                                                                    | 9     | 4.30E-01 | 1.00E+00  |
| ILMN_1902112 | AA72558        | -0.451820475 | Annotation Cluster 168 | Enrichment Score: 0.42                                                                                                                                                               | Count | P-Value  | Benjamini |
|              |                |              |                        |                                                                                                                                                                                      |       |          |           |

| Gene                                                                                                                                                                                                                                                                                                                                                                                                                                                                                                                                                                                                                                                                                                                                                                                                                                                                                                                                                                                                                                                                                                                                                                                                                                                                                                                                                                                                                                                                                                                                                                                                                                                                                                                                                                                                                                                                                                                                                                                                                                                                                                                                                                                                                                                                                                           | Transcript                                                                                                                                                                                        | Enrichment Score       | Count    | P-Value  | Benjamini | Biological Process |
|----------------------------------------------------------------------------------------------------------------------------------------------------------------------------------------------------------------------------------------------------------------------------------------------------------------------------------------------------------------------------------------------------------------------------------------------------------------------------------------------------------------------------------------------------------------------------------------------------------------------------------------------------------------------------------------------------------------------------------------------------------------------------------------------------------------------------------------------------------------------------------------------------------------------------------------------------------------------------------------------------------------------------------------------------------------------------------------------------------------------------------------------------------------------------------------------------------------------------------------------------------------------------------------------------------------------------------------------------------------------------------------------------------------------------------------------------------------------------------------------------------------------------------------------------------------------------------------------------------------------------------------------------------------------------------------------------------------------------------------------------------------------------------------------------------------------------------------------------------------------------------------------------------------------------------------------------------------------------------------------------------------------------------------------------------------------------------------------------------------------------------------------------------------------------------------------------------------------------------------------------------------------------------------------------------------|---------------------------------------------------------------------------------------------------------------------------------------------------------------------------------------------------|------------------------|----------|----------|-----------|--------------------|
| ILMN_1737298<br>MAT2A<br>ILMN_1665943<br>MAP4K1                                                                                                                                                                                                                                                                                                                                                                                                                                                                                                                                                                                                                                                                                                                                                                                                                                                                                                                                                                                                                                                                                                                                                                                                                                                                                                                                                                                                                                                                                                                                                                                                                                                                                                                                                                                                                                                                                                                                                                                                                                                                                                                                                                                                                                                                | UP_SEQ_FEATURE                                                                                                                                                                                    | repeat:Spectrin 9      | 4        | 2.00E-01 | 1.00E+00  |                    |
|                                                                                                                                                                                                                                                                                                                                                                                                                                                                                                                                                                                                                                                                                                                                                                                                                                                                                                                                                                                                                                                                                                                                                                                                                                                                                                                                                                                                                                                                                                                                                                                                                                                                                                                                                                                                                                                                                                                                                                                                                                                                                                                                                                                                                                                                                                                | UP_SEQ_FEATURE                                                                                                                                                                                    | repeat:Spectrin 7      | 4        | 2.00E-01 | 1.00E+00  |                    |
|                                                                                                                                                                                                                                                                                                                                                                                                                                                                                                                                                                                                                                                                                                                                                                                                                                                                                                                                                                                                                                                                                                                                                                                                                                                                                                                                                                                                                                                                                                                                                                                                                                                                                                                                                                                                                                                                                                                                                                                                                                                                                                                                                                                                                                                                                                                | UP_SEQ_FEATURE                                                                                                                                                                                    | repeat:Spectrin 7      | 4        | 2.00E-01 | 1.00E+00  |                    |
|                                                                                                                                                                                                                                                                                                                                                                                                                                                                                                                                                                                                                                                                                                                                                                                                                                                                                                                                                                                                                                                                                                                                                                                                                                                                                                                                                                                                                                                                                                                                                                                                                                                                                                                                                                                                                                                                                                                                                                                                                                                                                                                                                                                                                                                                                                                | UP_SEQ_FEATURE                                                                                                                                                                                    | repeat:Spectrin 7      | 4        | 2.00E-01 | 1.00E+00  |                    |
|                                                                                                                                                                                                                                                                                                                                                                                                                                                                                                                                                                                                                                                                                                                                                                                                                                                                                                                                                                                                                                                                                                                                                                                                                                                                                                                                                                                                                                                                                                                                                                                                                                                                                                                                                                                                                                                                                                                                                                                                                                                                                                                                                                                                                                                                                                                | INTERPRO                                                                                                                                                                                          | Spectrin/alpha-actinin | 6        | 3.50E-01 | 1.00E+00  |                    |
|                                                                                                                                                                                                                                                                                                                                                                                                                                                                                                                                                                                                                                                                                                                                                                                                                                                                                                                                                                                                                                                                                                                                                                                                                                                                                                                                                                                                                                                                                                                                                                                                                                                                                                                                                                                                                                                                                                                                                                                                                                                                                                                                                                                                                                                                                                                | SMART                                                                                                                                                                                             | SPEC                   | 6        | 3.90E-01 | 9.70E-01  |                    |
|                                                                                                                                                                                                                                                                                                                                                                                                                                                                                                                                                                                                                                                                                                                                                                                                                                                                                                                                                                                                                                                                                                                                                                                                                                                                                                                                                                                                                                                                                                                                                                                                                                                                                                                                                                                                                                                                                                                                                                                                                                                                                                                                                                                                                                                                                                                | UP_SEQ_FEATURE                                                                                                                                                                                    | repeat:Spectrin 16     | 3        | 4.40E-01 | 1.00E+00  |                    |
|                                                                                                                                                                                                                                                                                                                                                                                                                                                                                                                                                                                                                                                                                                                                                                                                                                                                                                                                                                                                                                                                                                                                                                                                                                                                                                                                                                                                                                                                                                                                                                                                                                                                                                                                                                                                                                                                                                                                                                                                                                                                                                                                                                                                                                                                                                                | UP_SEQ_FEATURE                                                                                                                                                                                    | repeat:Spectrin 17     | 3        | 4.40E-01 | 1.00E+00  |                    |
|                                                                                                                                                                                                                                                                                                                                                                                                                                                                                                                                                                                                                                                                                                                                                                                                                                                                                                                                                                                                                                                                                                                                                                                                                                                                                                                                                                                                                                                                                                                                                                                                                                                                                                                                                                                                                                                                                                                                                                                                                                                                                                                                                                                                                                                                                                                | UP_SEQ_FEATURE                                                                                                                                                                                    | repeat:Spectrin 14     | 3        | 4.40E-01 | 1.00E+00  |                    |
|                                                                                                                                                                                                                                                                                                                                                                                                                                                                                                                                                                                                                                                                                                                                                                                                                                                                                                                                                                                                                                                                                                                                                                                                                                                                                                                                                                                                                                                                                                                                                                                                                                                                                                                                                                                                                                                                                                                                                                                                                                                                                                                                                                                                                                                                                                                | UP_SEQ_FEATURE                                                                                                                                                                                    | repeat:Spectrin 15     | 3        | 4.40E-01 | 1.00E+00  |                    |
| ILMN_1709114<br>TAB1<br>ILMN_1768284<br>PZR9<br>ILMN_1666449<br>LOC162427<br>ILMN_1706434<br>CSDA1P<br>ILMN_3248008<br>TUBB<br>ILMN_1700109<br>PTPVI1<br>ILMN_1807493<br>ACVRL1<br>ILMN_1689446<br>EIF3E<br>ILMN_2391912<br>SIC14L1<br>ILMN_1687857<br>SETGALNCA4<br>ILMN_1697544<br>SLC25A29<br>ILMN_1801130<br>STOML1<br>ILMN_1740788<br>PFC1<br>ILMN_1801307<br>TNFSF10<br>ILMN_2147133<br>NRP1<br>ILMN_1738369<br>TUFM<br>ILMN_1693650<br>FES<br>ILMN_1769705<br>H3FC3<br>ILMN_1661306<br>RPL29<br>ILMN_1786852<br>ZCCHC3<br>ILMN_1693986<br>WHAMM1L2<br>ILMN_1807169<br>TINAGL1<br>ILMN_1783226<br>SRR2<br>ILMN_1651395<br>MFR2<br>ILMN_3249419<br>FLJ14186<br>ILMN_1732615<br>ASMTL<br>ILMN_2406169<br>PKIG<br>ILMN_1686981<br>SULF2<br>ILMN_2181411<br>ATL1<br>ILMN_1725193<br>IGFBP2<br>ILMN_1654032<br>ZER1<br>ILMN_1675266<br>NAGPA<br>ILMN_3295847<br>RPL6<br>ILMN_1815519<br>FWD2<br>ILMN_1688534<br>EIF2B5<br>ILMN_1696757<br>TTC14<br>ILMN_3251728<br>MTMR10<br>ILMN_3283573<br>RPL4<br>ILMN_1675992<br>DST<br>ILMN_2183510<br>MANF<br>ILMN_1682929<br>SYTL2<br>ILMN_1665390<br>SPDYE7P<br>ILMN_2348503<br>PPIE<br>ILMN_1715832<br>PKX8A<br>ILMN_1669433<br>KIAA0913<br>ILMN_1754746<br>CNCB3<br>ILMN_1812557<br>CDKSRAP3<br>ILMN_1737964<br>HATL1<br>ILMN_2383419<br>GMEB1<br>ILMN_1768812<br>FXD6<br>ILMN_1715305<br>TRIM6<br>ILMN_2397721<br>GLI1<br>ILMN_1792135<br>SLC35A2<br>ILMN_1666376<br>TRIM56<br>ILMN_1809495<br>COXA8<br>ILMN_2257015<br>AGER<br>ILMN_1751515<br>F15<br>ILMN_2124836<br>RGL2<br>ILMN_1734742<br>ARHGDA1<br>ILMN_1727041<br>EWSR1<br>ILMN_3238221<br>FLJ42627<br>ILMN_1797298<br>MYL11<br>ILMN_2160388<br>RPL24<br>ILMN_1688011<br>UPF1<br>ILMN_1785272<br>COLL2A<br>ILMN_1759915<br>ARPC1A<br>ILMN_2316806<br>RWD01<br>ILMN_1660554<br>VWA1<br>ILMN_1806299<br>SNO8<br>ILMN_2058782<br>PI27<br>ILMN_1804384<br>ASMTL<br>ILMN_3282436<br>EIF3F                                                                                                                                                                                                                                                                                                                                                                                                                       | UP_SEQ_FEATURE                                                                                                                                                                                    | repeat:Spectrin 9      | 4        | 2.00E-01 | 1.00E+00  |                    |
|                                                                                                                                                                                                                                                                                                                                                                                                                                                                                                                                                                                                                                                                                                                                                                                                                                                                                                                                                                                                                                                                                                                                                                                                                                                                                                                                                                                                                                                                                                                                                                                                                                                                                                                                                                                                                                                                                                                                                                                                                                                                                                                                                                                                                                                                                                                | UP_SEQ_FEATURE                                                                                                                                                                                    | repeat:Spectrin 7      | 4        | 2.00E-01 | 1.00E+00  |                    |
|                                                                                                                                                                                                                                                                                                                                                                                                                                                                                                                                                                                                                                                                                                                                                                                                                                                                                                                                                                                                                                                                                                                                                                                                                                                                                                                                                                                                                                                                                                                                                                                                                                                                                                                                                                                                                                                                                                                                                                                                                                                                                                                                                                                                                                                                                                                | UP_SEQ_FEATURE                                                                                                                                                                                    | repeat:Spectrin 7      | 4        | 2.00E-01 | 1.00E+00  |                    |
|                                                                                                                                                                                                                                                                                                                                                                                                                                                                                                                                                                                                                                                                                                                                                                                                                                                                                                                                                                                                                                                                                                                                                                                                                                                                                                                                                                                                                                                                                                                                                                                                                                                                                                                                                                                                                                                                                                                                                                                                                                                                                                                                                                                                                                                                                                                | UP_SEQ_FEATURE                                                                                                                                                                                    | repeat:Spectrin 7      | 4        | 2.00E-01 | 1.00E+00  |                    |
|                                                                                                                                                                                                                                                                                                                                                                                                                                                                                                                                                                                                                                                                                                                                                                                                                                                                                                                                                                                                                                                                                                                                                                                                                                                                                                                                                                                                                                                                                                                                                                                                                                                                                                                                                                                                                                                                                                                                                                                                                                                                                                                                                                                                                                                                                                                | INTERPRO                                                                                                                                                                                          | Spectrin/alpha-actinin | 6        | 3.50E-01 | 1.00E+00  |                    |
|                                                                                                                                                                                                                                                                                                                                                                                                                                                                                                                                                                                                                                                                                                                                                                                                                                                                                                                                                                                                                                                                                                                                                                                                                                                                                                                                                                                                                                                                                                                                                                                                                                                                                                                                                                                                                                                                                                                                                                                                                                                                                                                                                                                                                                                                                                                | SMART                                                                                                                                                                                             | SPEC                   | 6        | 3.90E-01 | 9.70E-01  |                    |
|                                                                                                                                                                                                                                                                                                                                                                                                                                                                                                                                                                                                                                                                                                                                                                                                                                                                                                                                                                                                                                                                                                                                                                                                                                                                                                                                                                                                                                                                                                                                                                                                                                                                                                                                                                                                                                                                                                                                                                                                                                                                                                                                                                                                                                                                                                                | UP_SEQ_FEATURE                                                                                                                                                                                    | repeat:Spectrin 16     | 3        | 4.40E-01 | 1.00E+00  |                    |
|                                                                                                                                                                                                                                                                                                                                                                                                                                                                                                                                                                                                                                                                                                                                                                                                                                                                                                                                                                                                                                                                                                                                                                                                                                                                                                                                                                                                                                                                                                                                                                                                                                                                                                                                                                                                                                                                                                                                                                                                                                                                                                                                                                                                                                                                                                                | UP_SEQ_FEATURE                                                                                                                                                                                    | repeat:Spectrin 17     | 3        | 4.40E-01 | 1.00E+00  |                    |
|                                                                                                                                                                                                                                                                                                                                                                                                                                                                                                                                                                                                                                                                                                                                                                                                                                                                                                                                                                                                                                                                                                                                                                                                                                                                                                                                                                                                                                                                                                                                                                                                                                                                                                                                                                                                                                                                                                                                                                                                                                                                                                                                                                                                                                                                                                                | UP_SEQ_FEATURE                                                                                                                                                                                    | repeat:Spectrin 14     | 3        | 4.40E-01 | 1.00E+00  |                    |
|                                                                                                                                                                                                                                                                                                                                                                                                                                                                                                                                                                                                                                                                                                                                                                                                                                                                                                                                                                                                                                                                                                                                                                                                                                                                                                                                                                                                                                                                                                                                                                                                                                                                                                                                                                                                                                                                                                                                                                                                                                                                                                                                                                                                                                                                                                                | UP_SEQ_FEATURE                                                                                                                                                                                    | repeat:Spectrin 15     | 3        | 4.40E-01 | 1.00E+00  |                    |
| UP_SEQ_FEATURE                                                                                                                                                                                                                                                                                                                                                                                                                                                                                                                                                                                                                                                                                                                                                                                                                                                                                                                                                                                                                                                                                                                                                                                                                                                                                                                                                                                                                                                                                                                                                                                                                                                                                                                                                                                                                                                                                                                                                                                                                                                                                                                                                                                                                                                                                                 | repeat:Spectrin 12                                                                                                                                                                                | 3                      | 4.40E-01 | 1.00E+00 |           |                    |
| UP_SEQ_FEATURE                                                                                                                                                                                                                                                                                                                                                                                                                                                                                                                                                                                                                                                                                                                                                                                                                                                                                                                                                                                                                                                                                                                                                                                                                                                                                                                                                                                                                                                                                                                                                                                                                                                                                                                                                                                                                                                                                                                                                                                                                                                                                                                                                                                                                                                                                                 | repeat:Spectrin 13                                                                                                                                                                                | 3                      | 4.40E-01 | 1.00E+00 |           |                    |
| UP_SEQ_FEATURE                                                                                                                                                                                                                                                                                                                                                                                                                                                                                                                                                                                                                                                                                                                                                                                                                                                                                                                                                                                                                                                                                                                                                                                                                                                                                                                                                                                                                                                                                                                                                                                                                                                                                                                                                                                                                                                                                                                                                                                                                                                                                                                                                                                                                                                                                                 | repeat:Spectrin 11                                                                                                                                                                                | 3                      | 4.40E-01 | 1.00E+00 |           |                    |
| UP_SEQ_FEATURE                                                                                                                                                                                                                                                                                                                                                                                                                                                                                                                                                                                                                                                                                                                                                                                                                                                                                                                                                                                                                                                                                                                                                                                                                                                                                                                                                                                                                                                                                                                                                                                                                                                                                                                                                                                                                                                                                                                                                                                                                                                                                                                                                                                                                                                                                                 | repeat:Spectrin 10                                                                                                                                                                                | 3                      | 4.40E-01 | 1.00E+00 |           |                    |
| <b>Annotation Cluster 140</b> Enrichment Score: 0.84                                                                                                                                                                                                                                                                                                                                                                                                                                                                                                                                                                                                                                                                                                                                                                                                                                                                                                                                                                                                                                                                                                                                                                                                                                                                                                                                                                                                                                                                                                                                                                                                                                                                                                                                                                                                                                                                                                                                                                                                                                                                                                                                                                                                                                                           |                                                                                                                                                                                                   |                        |          |          |           |                    |
| GOTERM_BP_FAT                                                                                                                                                                                                                                                                                                                                                                                                                                                                                                                                                                                                                                                                                                                                                                                                                                                                                                                                                                                                                                                                                                                                                                                                                                                                                                                                                                                                                                                                                                                                                                                                                                                                                                                                                                                                                                                                                                                                                                                                                                                                                                                                                                                                                                                                                                  | response to organic substance                                                                                                                                                                     | 123                    | 1.90E-03 | 6.00E-02 |           |                    |
| GOTERM_BP_FAT                                                                                                                                                                                                                                                                                                                                                                                                                                                                                                                                                                                                                                                                                                                                                                                                                                                                                                                                                                                                                                                                                                                                                                                                                                                                                                                                                                                                                                                                                                                                                                                                                                                                                                                                                                                                                                                                                                                                                                                                                                                                                                                                                                                                                                                                                                  | cellular response to hormone stimulus                                                                                                                                                             | 24                     | 1.00E-01 | 6.90E-01 |           |                    |
| GOTERM_BP_FAT                                                                                                                                                                                                                                                                                                                                                                                                                                                                                                                                                                                                                                                                                                                                                                                                                                                                                                                                                                                                                                                                                                                                                                                                                                                                                                                                                                                                                                                                                                                                                                                                                                                                                                                                                                                                                                                                                                                                                                                                                                                                                                                                                                                                                                                                                                  | response to hormone stimulus                                                                                                                                                                      | 56                     | 1.70E-01 | 2.0E-01  |           |                    |
| GOTERM_BP_FAT                                                                                                                                                                                                                                                                                                                                                                                                                                                                                                                                                                                                                                                                                                                                                                                                                                                                                                                                                                                                                                                                                                                                                                                                                                                                                                                                                                                                                                                                                                                                                                                                                                                                                                                                                                                                                                                                                                                                                                                                                                                                                                                                                                                                                                                                                                  | insulin receptor signaling pathway                                                                                                                                                                | 8                      | 2.10E-01 | 8.70E-01 |           |                    |
| GOTERM_BP_FAT                                                                                                                                                                                                                                                                                                                                                                                                                                                                                                                                                                                                                                                                                                                                                                                                                                                                                                                                                                                                                                                                                                                                                                                                                                                                                                                                                                                                                                                                                                                                                                                                                                                                                                                                                                                                                                                                                                                                                                                                                                                                                                                                                                                                                                                                                                  | response to peptide hormone stimulus                                                                                                                                                              | 25                     | 2.20E-01 | 8.80E-01 |           |                    |
| GOTERM_BP_FAT                                                                                                                                                                                                                                                                                                                                                                                                                                                                                                                                                                                                                                                                                                                                                                                                                                                                                                                                                                                                                                                                                                                                                                                                                                                                                                                                                                                                                                                                                                                                                                                                                                                                                                                                                                                                                                                                                                                                                                                                                                                                                                                                                                                                                                                                                                  | response to endogenous stimulus                                                                                                                                                                   | 59                     | 2.70E-01 | 9.20E-01 |           |                    |
| GOTERM_BP_FAT                                                                                                                                                                                                                                                                                                                                                                                                                                                                                                                                                                                                                                                                                                                                                                                                                                                                                                                                                                                                                                                                                                                                                                                                                                                                                                                                                                                                                                                                                                                                                                                                                                                                                                                                                                                                                                                                                                                                                                                                                                                                                                                                                                                                                                                                                                  | cellular response to insulin stimulus                                                                                                                                                             | 12                     | 2.80E-01 | 9.20E-01 |           |                    |
| GOTERM_BP_FAT                                                                                                                                                                                                                                                                                                                                                                                                                                                                                                                                                                                                                                                                                                                                                                                                                                                                                                                                                                                                                                                                                                                                                                                                                                                                                                                                                                                                                                                                                                                                                                                                                                                                                                                                                                                                                                                                                                                                                                                                                                                                                                                                                                                                                                                                                                  | response to insulin stimulus                                                                                                                                                                      | 16                     | 3.40E-01 | 1.00E+00 |           |                    |
| GOTERM_BP_FAT                                                                                                                                                                                                                                                                                                                                                                                                                                                                                                                                                                                                                                                                                                                                                                                                                                                                                                                                                                                                                                                                                                                                                                                                                                                                                                                                                                                                                                                                                                                                                                                                                                                                                                                                                                                                                                                                                                                                                                                                                                                                                                                                                                                                                                                                                                  | response to steroid hormone stimulus                                                                                                                                                              | 23                     | 7.90E-01 | 1.00E+00 |           |                    |
| <b>Annotation Cluster 141</b> Enrichment Score: 0.83                                                                                                                                                                                                                                                                                                                                                                                                                                                                                                                                                                                                                                                                                                                                                                                                                                                                                                                                                                                                                                                                                                                                                                                                                                                                                                                                                                                                                                                                                                                                                                                                                                                                                                                                                                                                                                                                                                                                                                                                                                                                                                                                                                                                                                                           |                                                                                                                                                                                                   |                        |          |          |           |                    |
| INTERPRO                                                                                                                                                                                                                                                                                                                                                                                                                                                                                                                                                                                                                                                                                                                                                                                                                                                                                                                                                                                                                                                                                                                                                                                                                                                                                                                                                                                                                                                                                                                                                                                                                                                                                                                                                                                                                                                                                                                                                                                                                                                                                                                                                                                                                                                                                                       | Cell surface receptor (PT/PTG)                                                                                                                                                                    | 10                     | 2.20E-02 | 8.20E-01 |           |                    |
| SMART                                                                                                                                                                                                                                                                                                                                                                                                                                                                                                                                                                                                                                                                                                                                                                                                                                                                                                                                                                                                                                                                                                                                                                                                                                                                                                                                                                                                                                                                                                                                                                                                                                                                                                                                                                                                                                                                                                                                                                                                                                                                                                                                                                                                                                                                                                          | PT                                                                                                                                                                                                | 10                     | 2.90E-02 | 6.00E-01 |           |                    |
| INTERPRO                                                                                                                                                                                                                                                                                                                                                                                                                                                                                                                                                                                                                                                                                                                                                                                                                                                                                                                                                                                                                                                                                                                                                                                                                                                                                                                                                                                                                                                                                                                                                                                                                                                                                                                                                                                                                                                                                                                                                                                                                                                                                                                                                                                                                                                                                                       | Plexin/semaphorin/retrovir                                                                                                                                                                        | 11                     | 5.10E-02 | 9.20E-01 |           |                    |
| UP_SEQ_FEATURE                                                                                                                                                                                                                                                                                                                                                                                                                                                                                                                                                                                                                                                                                                                                                                                                                                                                                                                                                                                                                                                                                                                                                                                                                                                                                                                                                                                                                                                                                                                                                                                                                                                                                                                                                                                                                                                                                                                                                                                                                                                                                                                                                                                                                                                                                                 | domain:PT/PTG 3                                                                                                                                                                                   | 5                      | 6.20E-02 | 1.00E+00 |           |                    |
| UP_SEQ_FEATURE                                                                                                                                                                                                                                                                                                                                                                                                                                                                                                                                                                                                                                                                                                                                                                                                                                                                                                                                                                                                                                                                                                                                                                                                                                                                                                                                                                                                                                                                                                                                                                                                                                                                                                                                                                                                                                                                                                                                                                                                                                                                                                                                                                                                                                                                                                 | domain:PT/PTG 2                                                                                                                                                                                   | 5                      | 6.20E-02 | 1.00E+00 |           |                    |
| SMART                                                                                                                                                                                                                                                                                                                                                                                                                                                                                                                                                                                                                                                                                                                                                                                                                                                                                                                                                                                                                                                                                                                                                                                                                                                                                                                                                                                                                                                                                                                                                                                                                                                                                                                                                                                                                                                                                                                                                                                                                                                                                                                                                                                                                                                                                                          | PSI                                                                                                                                                                                               | 11                     | 6.50E-02 | 7.50E-01 |           |                    |
| UP_SEQ_FEATURE                                                                                                                                                                                                                                                                                                                                                                                                                                                                                                                                                                                                                                                                                                                                                                                                                                                                                                                                                                                                                                                                                                                                                                                                                                                                                                                                                                                                                                                                                                                                                                                                                                                                                                                                                                                                                                                                                                                                                                                                                                                                                                                                                                                                                                                                                                 | domain:PT/PTG 4                                                                                                                                                                                   | 3                      | 2.50E-01 | 1.00E+00 |           |                    |
| INTERPRO                                                                                                                                                                                                                                                                                                                                                                                                                                                                                                                                                                                                                                                                                                                                                                                                                                                                                                                                                                                                                                                                                                                                                                                                                                                                                                                                                                                                                                                                                                                                                                                                                                                                                                                                                                                                                                                                                                                                                                                                                                                                                                                                                                                                                                                                                                       | Plexin cytosolic region                                                                                                                                                                           | 3                      | 3.20E-01 | 1.00E+00 |           |                    |
| INTERPRO                                                                                                                                                                                                                                                                                                                                                                                                                                                                                                                                                                                                                                                                                                                                                                                                                                                                                                                                                                                                                                                                                                                                                                                                                                                                                                                                                                                                                                                                                                                                                                                                                                                                                                                                                                                                                                                                                                                                                                                                                                                                                                                                                                                                                                                                                                       | Plexin                                                                                                                                                                                            | 6                      | 3.80E-01 | 1.00E+00 |           |                    |
| UP_SEQ_FEATURE                                                                                                                                                                                                                                                                                                                                                                                                                                                                                                                                                                                                                                                                                                                                                                                                                                                                                                                                                                                                                                                                                                                                                                                                                                                                                                                                                                                                                                                                                                                                                                                                                                                                                                                                                                                                                                                                                                                                                                                                                                                                                                                                                                                                                                                                                                 | domain:PT/PTG 1                                                                                                                                                                                   | 3                      | 3.90E-01 | 1.00E+00 |           |                    |
| UP_SEQ_FEATURE                                                                                                                                                                                                                                                                                                                                                                                                                                                                                                                                                                                                                                                                                                                                                                                                                                                                                                                                                                                                                                                                                                                                                                                                                                                                                                                                                                                                                                                                                                                                                                                                                                                                                                                                                                                                                                                                                                                                                                                                                                                                                                                                                                                                                                                                                                 | domain:Sema                                                                                                                                                                                       | 5                      | 5.30E-01 | 1.00E+00 |           |                    |
| INTERPRO                                                                                                                                                                                                                                                                                                                                                                                                                                                                                                                                                                                                                                                                                                                                                                                                                                                                                                                                                                                                                                                                                                                                                                                                                                                                                                                                                                                                                                                                                                                                                                                                                                                                                                                                                                                                                                                                                                                                                                                                                                                                                                                                                                                                                                                                                                       | Semaphorin/CD100 antigen                                                                                                                                                                          | 5                      | 5.60E-01 | 1.00E+00 |           |                    |
| SMART                                                                                                                                                                                                                                                                                                                                                                                                                                                                                                                                                                                                                                                                                                                                                                                                                                                                                                                                                                                                                                                                                                                                                                                                                                                                                                                                                                                                                                                                                                                                                                                                                                                                                                                                                                                                                                                                                                                                                                                                                                                                                                                                                                                                                                                                                                          | Sema                                                                                                                                                                                              | 5                      | 6.00E-01 | 9.90E-01 |           |                    |
| <b>Annotation Cluster 142</b> Enrichment Score: 0.83                                                                                                                                                                                                                                                                                                                                                                                                                                                                                                                                                                                                                                                                                                                                                                                                                                                                                                                                                                                                                                                                                                                                                                                                                                                                                                                                                                                                                                                                                                                                                                                                                                                                                                                                                                                                                                                                                                                                                                                                                                                                                                                                                                                                                                                           |                                                                                                                                                                                                   |                        |          |          |           |                    |
| GOTERM_CC_FAT                                                                                                                                                                                                                                                                                                                                                                                                                                                                                                                                                                                                                                                                                                                                                                                                                                                                                                                                                                                                                                                                                                                                                                                                                                                                                                                                                                                                                                                                                                                                                                                                                                                                                                                                                                                                                                                                                                                                                                                                                                                                                                                                                                                                                                                                                                  | endoplasmic reticulum part                                                                                                                                                                        | 62                     | 1.40E-02 | 1.60E-01 |           |                    |
| GOTERM_CC_FAT                                                                                                                                                                                                                                                                                                                                                                                                                                                                                                                                                                                                                                                                                                                                                                                                                                                                                                                                                                                                                                                                                                                                                                                                                                                                                                                                                                                                                                                                                                                                                                                                                                                                                                                                                                                                                                                                                                                                                                                                                                                                                                                                                                                                                                                                                                  | nuclear envelope-endoplasmic reticulum network                                                                                                                                                    | 40                     | 4.50E-01 | 9.00E-01 |           |                    |
| GOTERM_CC_FAT                                                                                                                                                                                                                                                                                                                                                                                                                                                                                                                                                                                                                                                                                                                                                                                                                                                                                                                                                                                                                                                                                                                                                                                                                                                                                                                                                                                                                                                                                                                                                                                                                                                                                                                                                                                                                                                                                                                                                                                                                                                                                                                                                                                                                                                                                                  | endoplasmic reticulum membrane                                                                                                                                                                    | 37                     | 5.20E-01 | 9.20E-01 |           |                    |
| <b>Annotation Cluster 143</b> Enrichment Score: 0.83                                                                                                                                                                                                                                                                                                                                                                                                                                                                                                                                                                                                                                                                                                                                                                                                                                                                                                                                                                                                                                                                                                                                                                                                                                                                                                                                                                                                                                                                                                                                                                                                                                                                                                                                                                                                                                                                                                                                                                                                                                                                                                                                                                                                                                                           |                                                                                                                                                                                                   |                        |          |          |           |                    |
| GOTERM_BP_FAT                                                                                                                                                                                                                                                                                                                                                                                                                                                                                                                                                                                                                                                                                                                                                                                                                                                                                                                                                                                                                                                                                                                                                                                                                                                                                                                                                                                                                                                                                                                                                                                                                                                                                                                                                                                                                                                                                                                                                                                                                                                                                                                                                                                                                                                                                                  | regulation of cellular catabolic process                                                                                                                                                          | 6                      | 1.80E-02 | 2.80E-01 |           |                    |
| GOTERM_BP_FAT                                                                                                                                                                                                                                                                                                                                                                                                                                                                                                                                                                                                                                                                                                                                                                                                                                                                                                                                                                                                                                                                                                                                                                                                                                                                                                                                                                                                                                                                                                                                                                                                                                                                                                                                                                                                                                                                                                                                                                                                                                                                                                                                                                                                                                                                                                  | regulation of proteolysis                                                                                                                                                                         | 14                     | 1.80E-02 | 2.80E-01 |           |                    |
| GOTERM_BP_FAT                                                                                                                                                                                                                                                                                                                                                                                                                                                                                                                                                                                                                                                                                                                                                                                                                                                                                                                                                                                                                                                                                                                                                                                                                                                                                                                                                                                                                                                                                                                                                                                                                                                                                                                                                                                                                                                                                                                                                                                                                                                                                                                                                                                                                                                                                                  | regulation of cellular catabolic process                                                                                                                                                          | 13                     | 9.90E-02 | 6.80E-01 |           |                    |
| GOTERM_BP_FAT                                                                                                                                                                                                                                                                                                                                                                                                                                                                                                                                                                                                                                                                                                                                                                                                                                                                                                                                                                                                                                                                                                                                                                                                                                                                                                                                                                                                                                                                                                                                                                                                                                                                                                                                                                                                                                                                                                                                                                                                                                                                                                                                                                                                                                                                                                  | positive regulation of proteolysis                                                                                                                                                                | 7                      | 1.00E-01 | 6.90E-01 |           |                    |
| GOTERM_BP_FAT                                                                                                                                                                                                                                                                                                                                                                                                                                                                                                                                                                                                                                                                                                                                                                                                                                                                                                                                                                                                                                                                                                                                                                                                                                                                                                                                                                                                                                                                                                                                                                                                                                                                                                                                                                                                                                                                                                                                                                                                                                                                                                                                                                                                                                                                                                  | negative regulation of catabolic process                                                                                                                                                          | 9                      | 1.10E-01 | 7.00E-01 |           |                    |
| GOTERM_BP_FAT                                                                                                                                                                                                                                                                                                                                                                                                                                                                                                                                                                                                                                                                                                                                                                                                                                                                                                                                                                                                                                                                                                                                                                                                                                                                                                                                                                                                                                                                                                                                                                                                                                                                                                                                                                                                                                                                                                                                                                                                                                                                                                                                                                                                                                                                                                  | positive regulation of protein catabolic process                                                                                                                                                  | 7                      | 1.40E-01 | 7.70E-01 |           |                    |
| GOTERM_BP_FAT                                                                                                                                                                                                                                                                                                                                                                                                                                                                                                                                                                                                                                                                                                                                                                                                                                                                                                                                                                                                                                                                                                                                                                                                                                                                                                                                                                                                                                                                                                                                                                                                                                                                                                                                                                                                                                                                                                                                                                                                                                                                                                                                                                                                                                                                                                  | negative regulation of proteolysis                                                                                                                                                                | 6                      | 1.50E-01 | 8.00E-01 |           |                    |
| GOTERM_BP_FAT                                                                                                                                                                                                                                                                                                                                                                                                                                                                                                                                                                                                                                                                                                                                                                                                                                                                                                                                                                                                                                                                                                                                                                                                                                                                                                                                                                                                                                                                                                                                                                                                                                                                                                                                                                                                                                                                                                                                                                                                                                                                                                                                                                                                                                                                                                  | regulation of proteasomal ubiquitin-dependent protein catabolic process                                                                                                                           | 4                      | 1.70E-01 | 8.20E-01 |           |                    |
| GOTERM_BP_FAT                                                                                                                                                                                                                                                                                                                                                                                                                                                                                                                                                                                                                                                                                                                                                                                                                                                                                                                                                                                                                                                                                                                                                                                                                                                                                                                                                                                                                                                                                                                                                                                                                                                                                                                                                                                                                                                                                                                                                                                                                                                                                                                                                                                                                                                                                                  | regulation of membrane protein ectodomain proteolysis                                                                                                                                             | 4                      | 2.40E-01 | 9.00E-01 |           |                    |
| GOTERM_BP_FAT                                                                                                                                                                                                                                                                                                                                                                                                                                                                                                                                                                                                                                                                                                                                                                                                                                                                                                                                                                                                                                                                                                                                                                                                                                                                                                                                                                                                                                                                                                                                                                                                                                                                                                                                                                                                                                                                                                                                                                                                                                                                                                                                                                                                                                                                                                  | regulation of protein catabolic process                                                                                                                                                           | 10                     | 2.40E-01 | 9.00E-01 |           |                    |
| GOTERM_BP_FAT                                                                                                                                                                                                                                                                                                                                                                                                                                                                                                                                                                                                                                                                                                                                                                                                                                                                                                                                                                                                                                                                                                                                                                                                                                                                                                                                                                                                                                                                                                                                                                                                                                                                                                                                                                                                                                                                                                                                                                                                                                                                                                                                                                                                                                                                                                  | regulation of catabolic process                                                                                                                                                                   | 16                     | 2.80E-01 | 9.20E-01 |           |                    |
| GOTERM_BP_FAT                                                                                                                                                                                                                                                                                                                                                                                                                                                                                                                                                                                                                                                                                                                                                                                                                                                                                                                                                                                                                                                                                                                                                                                                                                                                                                                                                                                                                                                                                                                                                                                                                                                                                                                                                                                                                                                                                                                                                                                                                                                                                                                                                                                                                                                                                                  | positive regulation of membrane protein ectodomain proteolysis                                                                                                                                    | 3                      | 3.40E-01 | 9.50E-01 |           |                    |
| GOTERM_BP_FAT                                                                                                                                                                                                                                                                                                                                                                                                                                                                                                                                                                                                                                                                                                                                                                                                                                                                                                                                                                                                                                                                                                                                                                                                                                                                                                                                                                                                                                                                                                                                                                                                                                                                                                                                                                                                                                                                                                                                                                                                                                                                                                                                                                                                                                                                                                  | negative regulation of protein catabolic process                                                                                                                                                  | 4                      | 3.90E-01 | 9.70E-01 |           |                    |
| GOTERM_BP_FAT                                                                                                                                                                                                                                                                                                                                                                                                                                                                                                                                                                                                                                                                                                                                                                                                                                                                                                                                                                                                                                                                                                                                                                                                                                                                                                                                                                                                                                                                                                                                                                                                                                                                                                                                                                                                                                                                                                                                                                                                                                                                                                                                                                                                                                                                                                  | positive regulation of catabolic process                                                                                                                                                          | 8                      | 4.70E-01 | 9.80E-01 |           |                    |
| GOTERM_BP_FAT                                                                                                                                                                                                                                                                                                                                                                                                                                                                                                                                                                                                                                                                                                                                                                                                                                                                                                                                                                                                                                                                                                                                                                                                                                                                                                                                                                                                                                                                                                                                                                                                                                                                                                                                                                                                                                                                                                                                                                                                                                                                                                                                                                                                                                                                                                  | positive regulation of cellular catabolic process                                                                                                                                                 | 6                      | 5.20E-01 | 9.90E-01 |           |                    |
| <b>Annotation Cluster 144</b> Enrichment Score: 0.81                                                                                                                                                                                                                                                                                                                                                                                                                                                                                                                                                                                                                                                                                                                                                                                                                                                                                                                                                                                                                                                                                                                                                                                                                                                                                                                                                                                                                                                                                                                                                                                                                                                                                                                                                                                                                                                                                                                                                                                                                                                                                                                                                                                                                                                           |                                                                                                                                                                                                   |                        |          |          |           |                    |
| GOTERM_MF_FAT                                                                                                                                                                                                                                                                                                                                                                                                                                                                                                                                                                                                                                                                                                                                                                                                                                                                                                                                                                                                                                                                                                                                                                                                                                                                                                                                                                                                                                                                                                                                                                                                                                                                                                                                                                                                                                                                                                                                                                                                                                                                                                                                                                                                                                                                                                  | oxidoreductase activity, acting on paired donors, with incorporation or reduction of molecular oxygen, 2-oxoglutarate as one donor, and incorporation of one atom each of oxygen into both donors | 8                      | 5.90E-02 | 6.50E-01 |           |                    |
| GOTERM_MF_FAT                                                                                                                                                                                                                                                                                                                                                                                                                                                                                                                                                                                                                                                                                                                                                                                                                                                                                                                                                                                                                                                                                                                                                                                                                                                                                                                                                                                                                                                                                                                                                                                                                                                                                                                                                                                                                                                                                                                                                                                                                                                                                                                                                                                                                                                                                                  | oxoglutarate-proline dihydrogenase activity                                                                                                                                                       | 3                      | 2.20E-01 | 9.30E-01 |           |                    |
| GOTERM_MF_FAT                                                                                                                                                                                                                                                                                                                                                                                                                                                                                                                                                                                                                                                                                                                                                                                                                                                                                                                                                                                                                                                                                                                                                                                                                                                                                                                                                                                                                                                                                                                                                                                                                                                                                                                                                                                                                                                                                                                                                                                                                                                                                                                                                                                                                                                                                                  | peptidyl-proline dihydrogenase activity                                                                                                                                                           | 3                      | 2.70E-01 | 9.60E-01 |           |                    |
| <b>Annotation Cluster 145</b> Enrichment Score: 0.81                                                                                                                                                                                                                                                                                                                                                                                                                                                                                                                                                                                                                                                                                                                                                                                                                                                                                                                                                                                                                                                                                                                                                                                                                                                                                                                                                                                                                                                                                                                                                                                                                                                                                                                                                                                                                                                                                                                                                                                                                                                                                                                                                                                                                                                           |                                                                                                                                                                                                   |                        |          |          |           |                    |
| GOTERM_BP_FAT                                                                                                                                                                                                                                                                                                                                                                                                                                                                                                                                                                                                                                                                                                                                                                                                                                                                                                                                                                                                                                                                                                                                                                                                                                                                                                                                                                                                                                                                                                                                                                                                                                                                                                                                                                                                                                                                                                                                                                                                                                                                                                                                                                                                                                                                                                  | small GTPase-mediated signal transduction                                                                                                                                                         | 56                     | 9.20E-03 | 1.90E-01 |           |                    |
| GOTERM_MF_FAT                                                                                                                                                                                                                                                                                                                                                                                                                                                                                                                                                                                                                                                                                                                                                                                                                                                                                                                                                                                                                                                                                                                                                                                                                                                                                                                                                                                                                                                                                                                                                                                                                                                                                                                                                                                                                                                                                                                                                                                                                                                                                                                                                                                                                                                                                                  | GTPase activity                                                                                                                                                                                   | 40                     | 1.20E-02 | 3.00E-01 |           |                    |
| UP_SEQ_FEATURE                                                                                                                                                                                                                                                                                                                                                                                                                                                                                                                                                                                                                                                                                                                                                                                                                                                                                                                                                                                                                                                                                                                                                                                                                                                                                                                                                                                                                                                                                                                                                                                                                                                                                                                                                                                                                                                                                                                                                                                                                                                                                                                                                                                                                                                                                                 | nucleotide phosphate-binding region:GTP                                                                                                                                                           | 48                     | 3.00E-02 | 9.90E-01 |           |                    |
| UP_SEQ_FEATURE                                                                                                                                                                                                                                                                                                                                                                                                                                                                                                                                                                                                                                                                                                                                                                                                                                                                                                                                                                                                                                                                                                                                                                                                                                                                                                                                                                                                                                                                                                                                                                                                                                                                                                                                                                                                                                                                                                                                                                                                                                                                                                                                                                                                                                                                                                 | short sequence motif/Effector region                                                                                                                                                              | 18                     | 6.30E-02 | 1.60E+00 |           |                    |
| SP_PIR_KEYWORDS                                                                                                                                                                                                                                                                                                                                                                                                                                                                                                                                                                                                                                                                                                                                                                                                                                                                                                                                                                                                                                                                                                                                                                                                                                                                                                                                                                                                                                                                                                                                                                                                                                                                                                                                                                                                                                                                                                                                                                                                                                                                                                                                                                                                                                                                                                | preylation                                                                                                                                                                                        | 26                     | 8.30E-02 | 3.90E-01 |           |                    |
| SP_PIR_KEYWORDS                                                                                                                                                                                                                                                                                                                                                                                                                                                                                                                                                                                                                                                                                                                                                                                                                                                                                                                                                                                                                                                                                                                                                                                                                                                                                                                                                                                                                                                                                                                                                                                                                                                                                                                                                                                                                                                                                                                                                                                                                                                                                                                                                                                                                                                                                                | gtp-binding                                                                                                                                                                                       | 49                     | 9.20E-02 | 4.10E-01 |           |                    |
| UP_SEQ_FEATURE                                                                                                                                                                                                                                                                                                                                                                                                                                                                                                                                                                                                                                                                                                                                                                                                                                                                                                                                                                                                                                                                                                                                                                                                                                                                                                                                                                                                                                                                                                                                                                                                                                                                                                                                                                                                                                                                                                                                                                                                                                                                                                                                                                                                                                                                                                 | lipid mobility-binding region:Seranyl/geranyl cysteine GTP binding                                                                                                                                | 18                     | 1.10E-01 | 1.00E+00 |           |                    |
| GOTERM_MF_FAT                                                                                                                                                                                                                                                                                                                                                                                                                                                                                                                                                                                                                                                                                                                                                                                                                                                                                                                                                                                                                                                                                                                                                                                                                                                                                                                                                                                                                                                                                                                                                                                                                                                                                                                                                                                                                                                                                                                                                                                                                                                                                                                                                                                                                                                                                                  | GTP binding                                                                                                                                                                                       | 55                     | 1.90E-01 | 9.00E-01 |           |                    |
| GOTERM_MF_FAT                                                                                                                                                                                                                                                                                                                                                                                                                                                                                                                                                                                                                                                                                                                                                                                                                                                                                                                                                                                                                                                                                                                                                                                                                                                                                                                                                                                                                                                                                                                                                                                                                                                                                                                                                                                                                                                                                                                                                                                                                                                                                                                                                                                                                                                                                                  | guanyl nucleotide binding                                                                                                                                                                         | 55                     | 2.00E-01 | 9.40E-01 |           |                    |
| GOTERM_MF_FAT                                                                                                                                                                                                                                                                                                                                                                                                                                                                                                                                                                                                                                                                                                                                                                                                                                                                                                                                                                                                                                                                                                                                                                                                                                                                                                                                                                                                                                                                                                                                                                                                                                                                                                                                                                                                                                                                                                                                                                                                                                                                                                                                                                                                                                                                                                  | axonal cytoskeletal binding                                                                                                                                                                       | 55                     | 2.50E-01 | 9.00E-01 |           |                    |
| INTERPRO                                                                                                                                                                                                                                                                                                                                                                                                                                                                                                                                                                                                                                                                                                                                                                                                                                                                                                                                                                                                                                                                                                                                                                                                                                                                                                                                                                                                                                                                                                                                                                                                                                                                                                                                                                                                                                                                                                                                                                                                                                                                                                                                                                                                                                                                                                       | BNA polymerase-sigma factor 54 interaction                                                                                                                                                        | 3                      | 4.10E-01 | 1.00E+00 |           |                    |
| INTERPRO                                                                                                                                                                                                                                                                                                                                                                                                                                                                                                                                                                                                                                                                                                                                                                                                                                                                                                                                                                                                                                                                                                                                                                                                                                                                                                                                                                                                                                                                                                                                                                                                                                                                                                                                                                                                                                                                                                                                                                                                                                                                                                                                                                                                                                                                                                       | Ras GTPase                                                                                                                                                                                        | 19                     | 4.40E-01 | 1.00E+00 |           |                    |
| INTERPRO                                                                                                                                                                                                                                                                                                                                                                                                                                                                                                                                                                                                                                                                                                                                                                                                                                                                                                                                                                                                                                                                                                                                                                                                                                                                                                                                                                                                                                                                                                                                                                                                                                                                                                                                                                                                                                                                                                                                                                                                                                                                                                                                                                                                                                                                                                       | Small GTP-binding protein                                                                                                                                                                         | 23                     | 4.50E-01 | 1.00E+00 |           |                    |
| INTERPRO                                                                                                                                                                                                                                                                                                                                                                                                                                                                                                                                                                                                                                                                                                                                                                                                                                                                                                                                                                                                                                                                                                                                                                                                                                                                                                                                                                                                                                                                                                                                                                                                                                                                                                                                                                                                                                                                                                                                                                                                                                                                                                                                                                                                                                                                                                       | Ras small GTPase, Ras type                                                                                                                                                                        | 9                      | 5.10E-01 | 1.00E+00 |           |                    |
| INTERPRO                                                                                                                                                                                                                                                                                                                                                                                                                                                                                                                                                                                                                                                                                                                                                                                                                                                                                                                                                                                                                                                                                                                                                                                                                                                                                                                                                                                                                                                                                                                                                                                                                                                                                                                                                                                                                                                                                                                                                                                                                                                                                                                                                                                                                                                                                                       | Ras                                                                                                                                                                                               | 17                     | 5.20E-01 | 1.00E+00 |           |                    |
| SMART                                                                                                                                                                                                                                                                                                                                                                                                                                                                                                                                                                                                                                                                                                                                                                                                                                                                                                                                                                                                                                                                                                                                                                                                                                                                                                                                                                                                                                                                                                                                                                                                                                                                                                                                                                                                                                                                                                                                                                                                                                                                                                                                                                                                                                                                                                          | RAS                                                                                                                                                                                               | 9                      | 5.60E-01 | 9.90E-01 |           |                    |
| PIR_SUPERFAMILY                                                                                                                                                                                                                                                                                                                                                                                                                                                                                                                                                                                                                                                                                                                                                                                                                                                                                                                                                                                                                                                                                                                                                                                                                                                                                                                                                                                                                                                                                                                                                                                                                                                                                                                                                                                                                                                                                                                                                                                                                                                                                                                                                                                                                                                                                                | PIRSF007130:Ras-related protein Rab                                                                                                                                                               | 3                      | 8.60E-01 | 1.00E+00 |           |                    |
| <b>Annotation Cluster 146</b> Enrichment Score: 0.81                                                                                                                                                                                                                                                                                                                                                                                                                                                                                                                                                                                                                                                                                                                                                                                                                                                                                                                                                                                                                                                                                                                                                                                                                                                                                                                                                                                                                                                                                                                                                                                                                                                                                                                                                                                                                                                                                                                                                                                                                                                                                                                                                                                                                                                           |                                                                                                                                                                                                   |                        |          |          |           |                    |
| INTERPRO                                                                                                                                                                                                                                                                                                                                                                                                                                                                                                                                                                                                                                                                                                                                                                                                                                                                                                                                                                                                                                                                                                                                                                                                                                                                                                                                                                                                                                                                                                                                                                                                                                                                                                                                                                                                                                                                                                                                                                                                                                                                                                                                                                                                                                                                                                       | MIF4-like_type 3                                                                                                                                                                                  | 4                      | 1.20E-01 | 9.80E-01 |           |                    |
| INTERPRO                                                                                                                                                                                                                                                                                                                                                                                                                                                                                                                                                                                                                                                                                                                                                                                                                                                                                                                                                                                                                                                                                                                                                                                                                                                                                                                                                                                                                                                                                                                                                                                                                                                                                                                                                                                                                                                                                                                                                                                                                                                                                                                                                                                                                                                                                                       | MIF4-like_type 1/2/3                                                                                                                                                                              | 4                      | 1.20E-01 | 9.80E-01 |           |                    |
| SMART                                                                                                                                                                                                                                                                                                                                                                                                                                                                                                                                                                                                                                                                                                                                                                                                                                                                                                                                                                                                                                                                                                                                                                                                                                                                                                                                                                                                                                                                                                                                                                                                                                                                                                                                                                                                                                                                                                                                                                                                                                                                                                                                                                                                                                                                                                          | MIF4                                                                                                                                                                                              | 4                      | 1.40E-01 | 8.10E-01 |           |                    |
| UP_SEQ_FEATURE                                                                                                                                                                                                                                                                                                                                                                                                                                                                                                                                                                                                                                                                                                                                                                                                                                                                                                                                                                                                                                                                                                                                                                                                                                                                                                                                                                                                                                                                                                                                                                                                                                                                                                                                                                                                                                                                                                                                                                                                                                                                                                                                                                                                                                                                                                 | domain:MIF4G                                                                                                                                                                                      | 3                      | 3.00E-01 | 1.00E+00 |           |                    |
| <b>Annotation Cluster 147</b> Enrichment Score: 0.77                                                                                                                                                                                                                                                                                                                                                                                                                                                                                                                                                                                                                                                                                                                                                                                                                                                                                                                                                                                                                                                                                                                                                                                                                                                                                                                                                                                                                                                                                                                                                                                                                                                                                                                                                                                                                                                                                                                                                                                                                                                                                                                                                                                                                                                           |                                                                                                                                                                                                   |                        |          |          |           |                    |
| SP_PIR_KEYWORDS                                                                                                                                                                                                                                                                                                                                                                                                                                                                                                                                                                                                                                                                                                                                                                                                                                                                                                                                                                                                                                                                                                                                                                                                                                                                                                                                                                                                                                                                                                                                                                                                                                                                                                                                                                                                                                                                                                                                                                                                                                                                                                                                                                                                                                                                                                | ascorbic acid                                                                                                                                                                                     | 5                      | 2.60E-03 | 3.40E-02 |           |                    |
| ILMN_1866314<br>BX118075<br>ILMN_2247126<br>KIA0889<br>ILMN_1690330<br>RPL3B<br>ILMN_1690530<br>FER1L5<br>ILMN_3287849<br>LOC440419<br>ILMN_3241154<br>POM121LLP<br>ILMN_1713024<br>PCDHA4<br>ILMN_1681278<br>BM655414<br>ILMN_1659484<br>MAGEC3<br>ILMN_2364819<br>USP44<br>ILMN_1798206<br>KRTAP11-1<br>ILMN_2175520<br>RPL3293<br>ILMN_1724211<br>GPRC5C<br>ILMN_1769358<br>NPBWR2<br>ILMN_2173909<br>ZNF14<br>ILMN_1888633<br>CLN2<br>ILMN_1709346<br>CLTB<br>ILMN_1796772<br>ARHGAP28<br>ILMN_1731966<br>LEPR<br>ILMN_1765132<br>LACTB<br>ILMN_264646<br>FAM54B<br>ILMN_1900782<br>BE466650<br>ILMN_1805389<br>PCGFB<br>ILMN_1890421<br>DBS1101<br>ILMN_1783847<br>FOCS1D<br>ILMN_1768049<br>FOXP3<br>ILMN_1789096<br>OSTalpha<br>ILMN_1781031<br>CTBR2<br>ILMN_2166706<br>FBXO22O5<br>ILMN_1662865<br>CPED1<br>ILMN_1794528<br>KIA1751<br>ILMN_1805449<br>TBPBL<br>ILMN_1662880<br>FAPB<br>ILMN_1803654<br>PCGCF<br>ILMN_1897911<br>BFL12455<br>ILMN_1701497<br>CD5L<br>ILMN_1693992<br>SYNPO2<br>ILMN_1765355<br>NOX1<br>ILMN_1846022<br>BCD42566<br>ILMN_2059606<br>CCDC117<br>ILMN_2097052<br>CDY2B<br>ILMN_1818538<br>DARSS529<br>ILMN_1893487<br>ORZV1<br>ILMN_1687976<br>UNC5C<br>ILMN_1825242<br>A0919474<br>ILMN_1708393<br>C1orf185<br>ILMN_1699278<br>BTD<br>ILMN_1814769<br>UGT2B15<br>ILMN_1697289<br>ZNF713<br>ILMN_1683664<br>FAM60A<br>ILMN_1672325<br>PYDC2<br>ILMN_1777156<br>GTPBP3<br>ILMN_1708989<br>TRK1<br>ILMN_1876039<br>A0812958<br>ILMN_1827966<br>AKO23961<br>ILMN_2103720<br>RMLP15<br>ILMN_1683097<br>RPS6KA5<br>ILMN_1869063<br>BM715829<br>ILMN_1693771<br>ASPH<br>ILMN_1699591<br>COLQ<br>ILMN_2325221<br>LOC544936<br>ILMN_1770692<br>WOR12<br>ILMN_1806492<br>TNR<br>ILMN_1699508<br>SLC3A5<br>ILMN_1818935<br>BOS75873<br>ILMN_1818935<br>S4C4L1<br>ILMN_1728975<br>SCD1<br>ILMN_1655521<br>DMRTA1<br>ILMN_1694078<br>AY538310<br>ILMN_1693878<br>GMPPA<br>ILMN_1704949<br>KRT25<br>ILMN_2066320<br>UGT1A1<br>ILMN_1800612<br>VBP1<br>ILMN_1843425<br>AF520419<br>ILMN_1738113<br>ER13<br>ILMN_1900457<br>N4<br>ILMN_2162326<br>P7B<br>ILMN_2103087<br>ORAN3P<br>ILMN_1673716<br>KIF6<br>ILMN_1763092<br>MCCD1<br>ILMN_1756721<br>F5CB<br>ILMN_1688935<br>N4<br>ILMN_1806703<br>ORAN3P<br>ILMN_1680673<br>NTSDC1<br>ILMN_1786658<br>BOLA3<br>ILMN_1903568<br>CR625988 | GOTERM_BP_FAT                                                                                                                                                                                     | gut development        | 4        | 7.50E-01 | 1.00E+00  |                    |
| <b>Annotation Cluster 177</b> Enrichment Score: 0.4                                                                                                                                                                                                                                                                                                                                                                                                                                                                                                                                                                                                                                                                                                                                                                                                                                                                                                                                                                                                                                                                                                                                                                                                                                                                                                                                                                                                                                                                                                                                                                                                                                                                                                                                                                                                                                                                                                                                                                                                                                                                                                                                                                                                                                                            |                                                                                                                                                                                                   |                        |          |          |           |                    |
| GOTERM_BP_FAT                                                                                                                                                                                                                                                                                                                                                                                                                                                                                                                                                                                                                                                                                                                                                                                                                                                                                                                                                                                                                                                                                                                                                                                                                                                                                                                                                                                                                                                                                                                                                                                                                                                                                                                                                                                                                                                                                                                                                                                                                                                                                                                                                                                                                                                                                                  | negative regulation of specific transcription from RNA polymerase II promoter                                                                                                                     | 7                      | 2.60E-01 | 9.90E-01 |           |                    |
| GOTERM_BP_FAT                                                                                                                                                                                                                                                                                                                                                                                                                                                                                                                                                                                                                                                                                                                                                                                                                                                                                                                                                                                                                                                                                                                                                                                                                                                                                                                                                                                                                                                                                                                                                                                                                                                                                                                                                                                                                                                                                                                                                                                                                                                                                                                                                                                                                                                                                                  | Control of Gene Expression by Vitamin D Receptor                                                                                                                                                  | 5                      | 3.30E-01 | 9.90E-01 |           |                    |
| GOTERM_BP_FAT                                                                                                                                                                                                                                                                                                                                                                                                                                                                                                                                                                                                                                                                                                                                                                                                                                                                                                                                                                                                                                                                                                                                                                                                                                                                                                                                                                                                                                                                                                                                                                                                                                                                                                                                                                                                                                                                                                                                                                                                                                                                                                                                                                                                                                                                                                  | regulation of gene-specific transcription                                                                                                                                                         | 17                     | 3.50E-01 | 1.00E+00 |           |                    |
| GOTERM_BP_FAT                                                                                                                                                                                                                                                                                                                                                                                                                                                                                                                                                                                                                                                                                                                                                                                                                                                                                                                                                                                                                                                                                                                                                                                                                                                                                                                                                                                                                                                                                                                                                                                                                                                                                                                                                                                                                                                                                                                                                                                                                                                                                                                                                                                                                                                                                                  | negative regulation of gene-specific transcription                                                                                                                                                | 7                      | 4.00E-01 | 1.00E+00 |           |                    |
| GOTERM_BP_FAT                                                                                                                                                                                                                                                                                                                                                                                                                                                                                                                                                                                                                                                                                                                                                                                                                                                                                                                                                                                                                                                                                                                                                                                                                                                                                                                                                                                                                                                                                                                                                                                                                                                                                                                                                                                                                                                                                                                                                                                                                                                                                                                                                                                                                                                                                                  | regulation of specific transcription from RNA polymerase II promoter                                                                                                                              | 12                     | 4.10E-01 | 1.00E+00 |           |                    |
| GOTERM_BP_FAT                                                                                                                                                                                                                                                                                                                                                                                                                                                                                                                                                                                                                                                                                                                                                                                                                                                                                                                                                                                                                                                                                                                                                                                                                                                                                                                                                                                                                                                                                                                                                                                                                                                                                                                                                                                                                                                                                                                                                                                                                                                                                                                                                                                                                                                                                                  | positive regulation of specific transcription from RNA polymerase II promoter                                                                                                                     | 7                      | 5.70E-01 | 1.00E+00 |           |                    |
| GOTERM_BP_FAT                                                                                                                                                                                                                                                                                                                                                                                                                                                                                                                                                                                                                                                                                                                                                                                                                                                                                                                                                                                                                                                                                                                                                                                                                                                                                                                                                                                                                                                                                                                                                                                                                                                                                                                                                                                                                                                                                                                                                                                                                                                                                                                                                                                                                                                                                                  | positive regulation of gene-specific transcription                                                                                                                                                | 10                     | 5.80E-01 | 1.00E+00 |           |                    |
| <b>Annotation Cluster 178</b> Enrichment Score: 0.4                                                                                                                                                                                                                                                                                                                                                                                                                                                                                                                                                                                                                                                                                                                                                                                                                                                                                                                                                                                                                                                                                                                                                                                                                                                                                                                                                                                                                                                                                                                                                                                                                                                                                                                                                                                                                                                                                                                                                                                                                                                                                                                                                                                                                                                            |                                                                                                                                                                                                   |                        |          |          |           |                    |
| INTERPRO                                                                                                                                                                                                                                                                                                                                                                                                                                                                                                                                                                                                                                                                                                                                                                                                                                                                                                                                                                                                                                                                                                                                                                                                                                                                                                                                                                                                                                                                                                                                                                                                                                                                                                                                                                                                                                                                                                                                                                                                                                                                                                                                                                                                                                                                                                       | Carbonic anhydrase, alpha-class, catalytic domain                                                                                                                                                 | 4                      | 3.00E-01 | 1.00E+00 |           |                    |
| PIR_SUPERFAMILY                                                                                                                                                                                                                                                                                                                                                                                                                                                                                                                                                                                                                                                                                                                                                                                                                                                                                                                                                                                                                                                                                                                                                                                                                                                                                                                                                                                                                                                                                                                                                                                                                                                                                                                                                                                                                                                                                                                                                                                                                                                                                                                                                                                                                                                                                                | PIRSF01392:carbonate dehydratase                                                                                                                                                                  | 3                      | 4.50E-01 | 1.00E+00 |           |                    |
| INTERPRO                                                                                                                                                                                                                                                                                                                                                                                                                                                                                                                                                                                                                                                                                                                                                                                                                                                                                                                                                                                                                                                                                                                                                                                                                                                                                                                                                                                                                                                                                                                                                                                                                                                                                                                                                                                                                                                                                                                                                                                                                                                                                                                                                                                                                                                                                                       | Carbonic anhydrase, alpha-class, conserved site                                                                                                                                                   | 3                      | 4.80E-01 | 1.00E+00 |           |                    |
| <b>Annotation Cluster 179</b> Enrichment Score: 0.4                                                                                                                                                                                                                                                                                                                                                                                                                                                                                                                                                                                                                                                                                                                                                                                                                                                                                                                                                                                                                                                                                                                                                                                                                                                                                                                                                                                                                                                                                                                                                                                                                                                                                                                                                                                                                                                                                                                                                                                                                                                                                                                                                                                                                                                            |                                                                                                                                                                                                   |                        |          |          |           |                    |
| GOTERM_BP_FAT                                                                                                                                                                                                                                                                                                                                                                                                                                                                                                                                                                                                                                                                                                                                                                                                                                                                                                                                                                                                                                                                                                                                                                                                                                                                                                                                                                                                                                                                                                                                                                                                                                                                                                                                                                                                                                                                                                                                                                                                                                                                                                                                                                                                                                                                                                  | regulation of binding                                                                                                                                                                             | 21                     | 1.90E-01 | 9.90E-01 |           |                    |
| GOTERM_BP_FAT                                                                                                                                                                                                                                                                                                                                                                                                                                                                                                                                                                                                                                                                                                                                                                                                                                                                                                                                                                                                                                                                                                                                                                                                                                                                                                                                                                                                                                                                                                                                                                                                                                                                                                                                                                                                                                                                                                                                                                                                                                                                                                                                                                                                                                                                                                  | positive regulation of DNA binding                                                                                                                                                                | 11                     | 2.00E-01 | 9.90E-01 |           |                    |
| GOTERM_BP_FAT                                                                                                                                                                                                                                                                                                                                                                                                                                                                                                                                                                                                                                                                                                                                                                                                                                                                                                                                                                                                                                                                                                                                                                                                                                                                                                                                                                                                                                                                                                                                                                                                                                                                                                                                                                                                                                                                                                                                                                                                                                                                                                                                                                                                                                                                                                  | positive regulation of binding                                                                                                                                                                    | 11                     | 3.10E-01 | 9.90E-01 |           |                    |
| GOTERM_BP_FAT                                                                                                                                                                                                                                                                                                                                                                                                                                                                                                                                                                                                                                                                                                                                                                                                                                                                                                                                                                                                                                                                                                                                                                                                                                                                                                                                                                                                                                                                                                                                                                                                                                                                                                                                                                                                                                                                                                                                                                                                                                                                                                                                                                                                                                                                                                  | positive regulation of transcription factor activity                                                                                                                                              | 8                      | 4.50E-01 | 1.00E+00 |           |                    |
| GOTERM_BP_FAT                                                                                                                                                                                                                                                                                                                                                                                                                                                                                                                                                                                                                                                                                                                                                                                                                                                                                                                                                                                                                                                                                                                                                                                                                                                                                                                                                                                                                                                                                                                                                                                                                                                                                                                                                                                                                                                                                                                                                                                                                                                                                                                                                                                                                                                                                                  | regulation of transcription factor activity                                                                                                                                                       | 12                     | 5.40E-01 | 1.00E+00 |           |                    |
| GOTERM_BP_FAT                                                                                                                                                                                                                                                                                                                                                                                                                                                                                                                                                                                                                                                                                                                                                                                                                                                                                                                                                                                                                                                                                                                                                                                                                                                                                                                                                                                                                                                                                                                                                                                                                                                                                                                                                                                                                                                                                                                                                                                                                                                                                                                                                                                                                                                                                                  | negative regulation of binding                                                                                                                                                                    | 7                      | 6.10E-01 | 1.00E+00 |           |                    |
| GOTERM_BP_FAT                                                                                                                                                                                                                                                                                                                                                                                                                                                                                                                                                                                                                                                                                                                                                                                                                                                                                                                                                                                                                                                                                                                                                                                                                                                                                                                                                                                                                                                                                                                                                                                                                                                                                                                                                                                                                                                                                                                                                                                                                                                                                                                                                                                                                                                                                                  | negative regulation of DNA binding                                                                                                                                                                | 6                      | 6.40E-01 | 1.00E+00 |           |                    |
| GOTERM_BP_FAT                                                                                                                                                                                                                                                                                                                                                                                                                                                                                                                                                                                                                                                                                                                                                                                                                                                                                                                                                                                                                                                                                                                                                                                                                                                                                                                                                                                                                                                                                                                                                                                                                                                                                                                                                                                                                                                                                                                                                                                                                                                                                                                                                                                                                                                                                                  | positive regulation of NF-kappaB transcription factor activity                                                                                                                                    | 5                      | 6.90E-01 | 1.00E+00 |           |                    |
| GOTERM_BP_FAT                                                                                                                                                                                                                                                                                                                                                                                                                                                                                                                                                                                                                                                                                                                                                                                                                                                                                                                                                                                                                                                                                                                                                                                                                                                                                                                                                                                                                                                                                                                                                                                                                                                                                                                                                                                                                                                                                                                                                                                                                                                                                                                                                                                                                                                                                                  | negative regulation of transcription factor activity                                                                                                                                              | 5                      | 7.20E-01 | 1.00E+00 |           |                    |
| <b>Annotation Cluster 180</b> Enrichment Score: 0.39                                                                                                                                                                                                                                                                                                                                                                                                                                                                                                                                                                                                                                                                                                                                                                                                                                                                                                                                                                                                                                                                                                                                                                                                                                                                                                                                                                                                                                                                                                                                                                                                                                                                                                                                                                                                                                                                                                                                                                                                                                                                                                                                                                                                                                                           |                                                                                                                                                                                                   |                        |          |          |           |                    |
| SP_PIR_KEYWORDS                                                                                                                                                                                                                                                                                                                                                                                                                                                                                                                                                                                                                                                                                                                                                                                                                                                                                                                                                                                                                                                                                                                                                                                                                                                                                                                                                                                                                                                                                                                                                                                                                                                                                                                                                                                                                                                                                                                                                                                                                                                                                                                                                                                                                                                                                                | GTP binding                                                                                                                                                                                       | 10                     | 2.60E-01 | 9.00E-01 |           |                    |
| SP_PIR_KEYWORDS                                                                                                                                                                                                                                                                                                                                                                                                                                                                                                                                                                                                                                                                                                                                                                                                                                                                                                                                                                                                                                                                                                                                                                                                                                                                                                                                                                                                                                                                                                                                                                                                                                                                                                                                                                                                                                                                                                                                                                                                                                                                                                                                                                                                                                                                                                | P-loop                                                                                                                                                                                            | 14                     | 4.40E-01 | 9.50E-01 |           |                    |
| SP_PIR_KEYWORDS                                                                                                                                                                                                                                                                                                                                                                                                                                                                                                                                                                                                                                                                                                                                                                                                                                                                                                                                                                                                                                                                                                                                                                                                                                                                                                                                                                                                                                                                                                                                                                                                                                                                                                                                                                                                                                                                                                                                                                                                                                                                                                                                                                                                                                                                                                | nucleotide binding                                                                                                                                                                                | 12                     | 5.70E-01 | 9.70E-01 |           |                    |
| <b>Annotation Cluster 181</b> Enrichment Score: 0.39                                                                                                                                                                                                                                                                                                                                                                                                                                                                                                                                                                                                                                                                                                                                                                                                                                                                                                                                                                                                                                                                                                                                                                                                                                                                                                                                                                                                                                                                                                                                                                                                                                                                                                                                                                                                                                                                                                                                                                                                                                                                                                                                                                                                                                                           |                                                                                                                                                                                                   |                        |          |          |           |                    |
| GOTERM_BP_FAT                                                                                                                                                                                                                                                                                                                                                                                                                                                                                                                                                                                                                                                                                                                                                                                                                                                                                                                                                                                                                                                                                                                                                                                                                                                                                                                                                                                                                                                                                                                                                                                                                                                                                                                                                                                                                                                                                                                                                                                                                                                                                                                                                                                                                                                                                                  | DNA damage response, signal transduction by p53 class mediator resulting in cell cycle arrest                                                                                                     | 3                      | 1.30E-01 | 9.80E-01 |           |                    |
| GOTERM_BP_FAT                                                                                                                                                                                                                                                                                                                                                                                                                                                                                                                                                                                                                                                                                                                                                                                                                                                                                                                                                                                                                                                                                                                                                                                                                                                                                                                                                                                                                                                                                                                                                                                                                                                                                                                                                                                                                                                                                                                                                                                                                                                                                                                                                                                                                                                                                                  | G1/S transition checkpoint                                                                                                                                                                        | 4                      | 2.70E-01 | 9.90E-01 |           |                    |
| GOTERM_BP_FAT                                                                                                                                                                                                                                                                                                                                                                                                                                                                                                                                                                                                                                                                                                                                                                                                                                                                                                                                                                                                                                                                                                                                                                                                                                                                                                                                                                                                                                                                                                                                                                                                                                                                                                                                                                                                                                                                                                                                                                                                                                                                                                                                                                                                                                                                                                  | G1 DNA damage checkpoint                                                                                                                                                                          | 3                      | 3.30E-01 | 9.90E-01 |           |                    |
| GOTERM_BP_FAT                                                                                                                                                                                                                                                                                                                                                                                                                                                                                                                                                                                                                                                                                                                                                                                                                                                                                                                                                                                                                                                                                                                                                                                                                                                                                                                                                                                                                                                                                                                                                                                                                                                                                                                                                                                                                                                                                                                                                                                                                                                                                                                                                                                                                                                                                                  | DNA damage checkpoint                                                                                                                                                                             | 7                      | 4.00E-01 | 1.00E+00 |           |                    |
| GOTERM_BP_FAT                                                                                                                                                                                                                                                                                                                                                                                                                                                                                                                                                                                                                                                                                                                                                                                                                                                                                                                                                                                                                                                                                                                                                                                                                                                                                                                                                                                                                                                                                                                                                                                                                                                                                                                                                                                                                                                                                                                                                                                                                                                                                                                                                                                                                                                                                                  | DNA integrity checkpoint                                                                                                                                                                          | 7                      | 4.80E-01 | 1.00E+00 |           |                    |
| GOTERM_BP_FAT                                                                                                                                                                                                                                                                                                                                                                                                                                                                                                                                                                                                                                                                                                                                                                                                                                                                                                                                                                                                                                                                                                                                                                                                                                                                                                                                                                                                                                                                                                                                                                                                                                                                                                                                                                                                                                                                                                                                                                                                                                                                                                                                                                                                                                                                                                  | mitotic cell cycle checkpoint                                                                                                                                                                     | 6                      | 4.80E-01 | 1.00E+00 |           |                    |
| GOTERM_BP_FAT                                                                                                                                                                                                                                                                                                                                                                                                                                                                                                                                                                                                                                                                                                                                                                                                                                                                                                                                                                                                                                                                                                                                                                                                                                                                                                                                                                                                                                                                                                                                                                                                                                                                                                                                                                                                                                                                                                                                                                                                                                                                                                                                                                                                                                                                                                  | cell cycle checkpoint                                                                                                                                                                             | 11                     | 5.00E-01 | 1.00E+00 |           |                    |
| GOTERM_BP_FAT                                                                                                                                                                                                                                                                                                                                                                                                                                                                                                                                                                                                                                                                                                                                                                                                                                                                                                                                                                                                                                                                                                                                                                                                                                                                                                                                                                                                                                                                                                                                                                                                                                                                                                                                                                                                                                                                                                                                                                                                                                                                                                                                                                                                                                                                                                  | DNA damage response, signal transduction                                                                                                                                                          | 8                      | 7.60E-01 | 1.00E+00 |           |                    |
| GOTERM_BP_FAT                                                                                                                                                                                                                                                                                                                                                                                                                                                                                                                                                                                                                                                                                                                                                                                                                                                                                                                                                                                                                                                                                                                                                                                                                                                                                                                                                                                                                                                                                                                                                                                                                                                                                                                                                                                                                                                                                                                                                                                                                                                                                                                                                                                                                                                                                                  | DNA damage response, signal transduction by p53 class mediator                                                                                                                                    | 3                      | 7.80E-01 | 1.00E+00 |           |                    |
| <b>Annotation Cluster 182</b> Enrichment Score: 0.39                                                                                                                                                                                                                                                                                                                                                                                                                                                                                                                                                                                                                                                                                                                                                                                                                                                                                                                                                                                                                                                                                                                                                                                                                                                                                                                                                                                                                                                                                                                                                                                                                                                                                                                                                                                                                                                                                                                                                                                                                                                                                                                                                                                                                                                           |                                                                                                                                                                                                   |                        |          |          |           |                    |
| SMART                                                                                                                                                                                                                                                                                                                                                                                                                                                                                                                                                                                                                                                                                                                                                                                                                                                                                                                                                                                                                                                                                                                                                                                                                                                                                                                                                                                                                                                                                                                                                                                                                                                                                                                                                                                                                                                                                                                                                                                                                                                                                                                                                                                                                                                                                                          | BDY                                                                                                                                                                                               | 12                     | 9.70E-02 | 9.70E-01 |           |                    |
| INTERPRO                                                                                                                                                                                                                                                                                                                                                                                                                                                                                                                                                                                                                                                                                                                                                                                                                                                                                                                                                                                                                                                                                                                                                                                                                                                                                                                                                                                                                                                                                                                                                                                                                                                                                                                                                                                                                                                                                                                                                                                                                                                                                                                                                                                                                                                                                                       | Zinc finger, B-box                                                                                                                                                                                | 12                     | 1.40E-01 | 1.00E+00 |           |                    |
| UP_SEQ_FEATURE                                                                                                                                                                                                                                                                                                                                                                                                                                                                                                                                                                                                                                                                                                                                                                                                                                                                                                                                                                                                                                                                                                                                                                                                                                                                                                                                                                                                                                                                                                                                                                                                                                                                                                                                                                                                                                                                                                                                                                                                                                                                                                                                                                                                                                                                                                 | zinc finger region:B box-type 2                                                                                                                                                                   | 4                      | 2.30E-01 | 1.00E+00 |           |                    |
| UP_SEQ_FEATURE                                                                                                                                                                                                                                                                                                                                                                                                                                                                                                                                                                                                                                                                                                                                                                                                                                                                                                                                                                                                                                                                                                                                                                                                                                                                                                                                                                                                                                                                                                                                                                                                                                                                                                                                                                                                                                                                                                                                                                                                                                                                                                                                                                                                                                                                                                 | zinc finger region:B box-type 1                                                                                                                                                                   | 8                      | 3.60E-01 | 1.00E+00 |           |                    |
| UP_SEQ                                                                                                                                                                                                                                                                                                                                                                                                                                                                                                                                                                                                                                                                                                                                                                                                                                                                                                                                                                                                                                                                                                                                                                                                                                                                                                                                                                                                                                                                                                                                                                                                                                                                                                                                                                                                                                                                                                                                                                                                                                                                                                                                                                                                                                                                                                         |                                                                                                                                                                                                   |                        |          |          |           |                    |





|              |            |             |                        |                                                                          |       |          |           |              |              |              |
|--------------|------------|-------------|------------------------|--------------------------------------------------------------------------|-------|----------|-----------|--------------|--------------|--------------|
| ILMN_1781572 | CLEC16A    | 0.664237109 | GOTERM_CC_FAT          | microtubule cytoskeleton                                                 | 87    | 6.10E-02 | 3.80E-01  | ILMN_1767230 | AXDND1       | -0.462985533 |
| ILMN_1721116 | USP10      | 0.664217881 | SP_PIR_KEYWORDS        | microtubule                                                              | 37    | 6.30E-02 | 3.30E-01  | ILMN_1817255 | LOC144438    | -0.463031801 |
| ILMN_2108709 | ANKRD11    | 0.664214754 | GOTERM_CC_FAT          | microtubule                                                              | 41    | 3.00E-01 | 7.80E-01  | ILMN_1768930 | UZAF2        | -0.463062918 |
| ILMN_1792344 | LOC653075  | 0.664161723 | GOTERM_BP_FAT          | microtubule-based process                                                | 28    | 9.00E-01 | 1.00E+00  | ILMN_1860288 | MBP92        | -0.463085596 |
| ILMN_2391458 | ACSL4      | 0.664146908 | Annotation Cluster 159 | Enrichment Score: 0.74                                                   | Count | P_Value  | Benjamini | ILMN_3242077 | FLJ33630     | -0.463121596 |
| ILMN_2206098 | ATG10      | 0.66410867  | GOTERM_BP_FAT          | regulation of binding                                                    | 31    | 1.60E-02 | 2.60E-01  | ILMN_1734229 | SPPL2A       | -0.463267776 |
| ILMN_1674036 | BIRC7      | 0.664008883 | GOTERM_BP_FAT          | positive regulation of binding                                           | 16    | 8.30E-02 | 6.30E-01  | ILMN_3292114 | LOC100131510 | -0.4632744   |
| ILMN_2282641 | TBXAS1     | 0.663984355 | GOTERM_BP_FAT          | regulation of DNA binding                                                | 22    | 1.10E-01 | 7.10E-01  | ILMN_1799583 | CLRN2        | -0.463348463 |
| ILMN_1741327 | SETD1A     | 0.663932846 | GOTERM_BP_FAT          | negative regulation of binding                                           | 12    | 1.50E-01 | 7.90E-01  | ILMN_1718042 | ZNF549       | -0.46335229  |
| ILMN_1680134 | CARM1      | 0.663893163 | GOTERM_BP_FAT          | negative regulation of DNA binding                                       | 10    | 2.30E-01 | 1.30E+01  | ILMN_1748819 | MBP92        | -0.463393752 |
| ILMN_1753584 | KRT8       | 0.6637219   | GOTERM_BP_FAT          | negative regulation of transcription factor activity                     | 9     | 2.40E-01 | 8.90E-01  | ILMN_1683390 | FLCN         | -0.463378395 |
| ILMN_1674421 | TM9SF4     | 0.66368151  | GOTERM_BP_FAT          | regulation of transcription factor activity                              | 17    | 2.80E-01 | 9.20E-01  | ILMN_1790603 | ATPAF1       | -0.463427045 |
| ILMN_1801845 | DNAI4      | 0.663586189 | GOTERM_BP_FAT          | positive regulation of DNA binding                                       | 12    | 3.10E-01 | 9.40E-01  | ILMN_1795000 | ORH3         | -0.463438428 |
| ILMN_1741997 | SNRPC      | 0.663274815 | GOTERM_BP_FAT          | positive regulation of transcription factor activity                     | 9     | 5.40E-01 | 9.90E-01  | ILMN_2413259 | SCY54        | -0.463474005 |
| ILMN_2157435 | DTN1B1     | 0.663217101 | GOTERM_BP_FAT          | positive regulation of NF-kappaB transcription factor activity           | 6     | 6.40E-01 | 1.00E+00  | ILMN_2089484 | CYH43        | -0.463475885 |
| ILMN_1653342 | DUS1L      | 0.66309881  | Annotation Cluster 160 | Enrichment Score: 0.74                                                   | Count | P_Value  | Benjamini | ILMN_1651966 | UCGL1        | -0.463507271 |
| ILMN_1809928 | COL6A2     | 0.662983404 | GOTERM_CC_FAT          | leading edge membrane                                                    | 8     | 2.60E-02 | 2.30E-01  | ILMN_1736630 | LOC100132024 | -0.46356997  |
| ILMN_2366864 | JUP        | 0.662950866 | GOTERM_CC_FAT          | axolemma                                                                 | 3     | 1.90E-01 | 6.50E-01  | ILMN_1895518 | AW68861      | -0.463575816 |
| ILMN_1651429 | SELM       | 0.662832499 | GOTERM_CC_FAT          | neuron projection membrane                                               | 3     | 2.90E-01 | 7.80E-01  | ILMN_1810330 | LOC440131    | -0.463577729 |
| ILMN_1769779 | PTP4A3     | 0.662799159 | GOTERM_CC_FAT          | axon part                                                                | 7     | 7.50E-01 | 9.80E-01  | ILMN_1804361 | SUFU         | -0.4636211   |
| ILMN_1782829 | GLTSCR1    | 0.662699983 | Annotation Cluster 161 | Enrichment Score: 0.74                                                   | Count | P_Value  | Benjamini | ILMN_1672957 | RP33293      | -0.463641722 |
| ILMN_1765403 | PL38       | 0.662686337 | UP_SEQ_FEATURE         | domain:WV                                                                | 7     | 4.20E-02 | 9.90E-01  | ILMN_1744059 | DC7N6        | -0.463671021 |
| ILMN_2211065 | TMEM91     | 0.662447488 | INTERPRO               | WV/RS/S/WVF                                                              | 9     | 3.50E-01 | 1.00E+00  | ILMN_1695036 | TPP3         | -0.463706361 |
| ILMN_2377496 | ERCC1      | 0.662353905 | SMART                  | WV                                                                       | 9     | 4.00E-01 | 9.60E-01  | ILMN_1733696 | IMP3         | -0.463724496 |
| ILMN_1757631 | DNBD1      | 0.662336505 | Annotation Cluster 162 | Enrichment Score: 0.74                                                   | Count | P_Value  | Benjamini | ILMN_2069821 | Ctorf32      | -0.463785453 |
| ILMN_1770085 | BTG2       | 0.662251178 | GOTERM_BP_FAT          | icosanoid biosynthetic process                                           | 10    | 1.60E-02 | 2.60E-01  | ILMN_1660727 | ENP55        | -0.463798942 |
| ILMN_2356099 | ADPGP3     | 0.662164961 | GOTERM_BP_FAT          | unsaturated fatty acid biosynthetic process                              | 10    | 2.35E-02 | 7.50E-01  | ILMN_2355978 | MBP92        | -0.463835049 |
| ILMN_1663577 | S100P8P    | 0.66209212  | GOTERM_BP_FAT          | icosanoid metabolic process                                              | 12    | 3.90E-02 | 4.40E-01  | ILMN_2221336 | ORP8R        | -0.463852421 |
| ILMN_1746012 | MDM6       | 0.662054439 | GOTERM_BP_FAT          | unsaturated fatty acid metabolic process                                 | 12    | 6.50E-02 | 5.70E-01  | ILMN_2382717 | OPN3         | -0.463866346 |
| ILMN_1783798 | GAS8       | 0.66192612  | INTERPRO               | terminal                                                                 | 3     | 8.00E-02 | 9.50E-01  | ILMN_1724367 | NDUF81       | -0.463939172 |
| ILMN_1659564 | SEC1A1     | 0.66185139  | GOTERM_MF_FAT          | aminopeptidase activity                                                  | 8     | 8.20E-02 | 7.40E-01  | ILMN_1760625 | DWZp434A171  | -0.463962596 |
| ILMN_2344323 | KCQ3_20425 | 0.66182132  | SP_PIR_KEYWORDS        | aminopeptidase                                                           | 7     | 8.40E-01 | 9.50E-01  | ILMN_1774930 | FLJ2641      | -0.463984441 |
| ILMN_2386389 | LOC653075  | 0.661501243 | GOTERM_BP_FAT          | prostaglandin metabolic process                                          | 6     | 9.50E-02 | 6.70E-01  | ILMN_3236382 | GNCT4        | -0.464006634 |
| ILMN_1757439 | RBM14      | 0.6612937   | GOTERM_BP_FAT          | prostaglandin metabolic process                                          | 6     | 9.50E-02 | 6.70E-01  | ILMN_1742203 | DYDC1        | -0.464010982 |
| ILMN_1795025 | NFX1       | 0.661171438 | GOTERM_BP_FAT          | prostaglandin biosynthetic process                                       | 4     | 1.70E-01 | 8.20E-01  | ILMN_1656218 | AK131040     | -0.464012025 |
| ILMN_1731135 | RAB118     | 0.661149939 | GOTERM_BP_FAT          | prostaglandin biosynthetic process                                       | 4     | 1.70E-01 | 8.20E-01  | ILMN_1657436 | FGFR1OP2     | -0.464128654 |
| ILMN_1787567 | TSC2D1     | 0.660853624 | INTERPRO               | Peptidase M1, membrane alanine aminopeptidase                            | 4     | 1.90E-01 | 9.90E-01  | ILMN_1750447 | GOLGA6A      | -0.464145869 |
| ILMN_1775677 | TYSD1      | 0.660845479 | INTERPRO               | Peptidase M1, membrane alanine aminopeptidase, N-terminal                | 4     | 2.20E-01 | 1.00E+00  | ILMN_1808537 | LRR656       | -0.464304091 |
| ILMN_1757467 | HLF0       | 0.660696733 | GOTERM_BP_FAT          | alkene biosynthetic process                                              | 5     | 2.40E-01 | 8.90E-01  | ILMN_1774589 | IQCC         | -0.464308049 |
| ILMN_3210917 | SET        | 0.660677071 | GOTERM_BP_FAT          | leukotriene biosynthetic process                                         | 5     | 2.40E-01 | 8.90E-01  | ILMN_1704255 | FAM159B      | -0.464316652 |
| ILMN_1672908 | TWIST1     | 0.660586019 | GOTERM_MF_FAT          | exopeptidase activity                                                    | 13    | 2.80E-01 | 9.60E-01  | ILMN_2138745 | C1orf93      | -0.464334062 |
| ILMN_2189396 | PL38L6A2   | 0.660584582 | GOTERM_BP_FAT          | leukotriene metabolic process                                            | 5     | 3.30E-01 | 9.50E-01  | ILMN_2305779 | NA           | -0.464402266 |
| ILMN_1722634 | NULB1      | 0.660555595 | GOTERM_BP_FAT          | cellular alkene metabolic process                                        | 5     | 3.60E-01 | 9.60E-01  | ILMN_1707694 | FAM22A       | -0.464442571 |
| ILMN_1757134 | MPV17L2    | 0.660542967 | GOTERM_BP_FAT          | fatty acid biosynthetic process                                          | 12    | 4.70E-01 | 9.80E-01  | ILMN_3235931 | LOC100132287 | -0.464488957 |
| ILMN_1792951 | ZHX2       | 0.660517834 | GOTERM_BP_FAT          | carboxylic acid biosynthetic process                                     | 20    | 6.70E-01 | 1.00E+00  | ILMN_1744701 | RGLS1        | -0.464522327 |
| ILMN_1654118 | BCL2L1     | 0.660482004 | GOTERM_BP_FAT          | organic acid biosynthetic process                                        | 20    | 6.70E-01 | 1.00E+00  | ILMN_1715742 | SLC22A1      | -0.464539519 |
| ILMN_2134538 | FTH1       | 0.660389058 | BIOCARTA               | Eicosanoid Metabolism                                                    | 4     | 8.00E-01 | 1.00E+00  | ILMN_2343232 | MIR1         | -0.464542661 |
| ILMN_1672399 | NDUFA7     | 0.660384357 | GOTERM_BP_FAT          | fatty acid metabolic process                                             | 22    | 8.50E-01 | 1.00E+00  | ILMN_2365765 | PRK20        | -0.464550224 |
| ILMN_1798181 | HEF7       | 0.659434799 | UP_SEQ_FEATURE         | metal-ion-binding site:Zinc; catalytic                                   | 12    | 8.90E-01 | 1.00E+00  | ILMN_3243986 | FAM72B       | -0.464568865 |
| ILMN_3208973 | LAMR1P15   | 0.659254689 | Annotation Cluster 163 | Enrichment Score: 0.74                                                   | Count | P_Value  | Benjamini | ILMN_2211189 | IKBKAP       | -0.464616851 |
| ILMN_1685837 | PIGR       | 0.660135579 | GOTERM_BP_FAT          | positive regulation of stress-activated protein kinase signaling pathway | 6     | 1.30E-01 | 7.60E-01  | ILMN_1694952 | SSX4B        | -0.464773608 |
| ILMN_1800634 | NME4       | 0.659963146 | GOTERM_BP_FAT          | regulation of stress-activated MAPK cascade                              | 4     | 1.40E-01 | 7.70E-01  | ILMN_1694734 | RUNX1T1      | -0.464779476 |
| ILMN_1786396 | ZFP1       | 0.659882909 | GOTERM_BP_FAT          | positive regulation of stress-activated MAPK cascade                     | 4     | 1.40E-01 | 7.70E-01  | ILMN_1732860 | FLJ26850     | -0.464843623 |
| ILMN_1808047 | PKCZ       | 0.659819214 | Annotation Cluster 164 | Enrichment Score: 0.74                                                   | Count | P_Value  | Benjamini | ILMN_1758116 | MCT51        | -0.464859519 |
| ILMN_1794072 | B3GAT1     | 0.659796348 | GOTERM_BP_FAT          | positive regulation of myeloid leukocyte differentiation                 | 6     | 7.80E-02 | 6.10E-01  | ILMN_1705085 | Cbrf77       | -0.464880181 |
| ILMN_2181089 | VPRB8      | 0.659730007 | GOTERM_BP_FAT          | positive regulation of myeloid cell differentiation                      | 8     | 1.40E-01 | 7.70E-01  | ILMN_1687439 | SNX20        | -0.464892833 |
| ILMN_1784218 | DDX23      | 0.659720074 | GOTERM_BP_FAT          | regulation of myeloid leukocyte differentiation                          | 9     | 1.60E-01 | 8.20E-01  | ILMN_1685057 | SLC22A4      | -0.464940871 |
| ILMN_1768181 | TOR3A      | 0.659512821 | GOTERM_BP_FAT          | positive regulation of osteoclast differentiation                        | 3     | 1.80E-01 | 8.40E-01  | ILMN_2060578 | IKSL5        | -0.464970899 |
| ILMN_1679239 | NDUFA7     | 0.659483457 | GOTERM_BP_FAT          | regulation of myeloid cell differentiation                               | 13    | 2.10E-01 | 8.70E-01  | ILMN_1684746 | IP011        | -0.465074254 |
| ILMN_1798181 | HEF7       | 0.659434799 | GOTERM_BP_FAT          | regulation of osteoclast differentiation                                 | 4     | 5.70E-01 | 9.90E-01  | ILMN_1760431 | GABRR1       | -0.465116271 |
| ILMN_3208973 | LAMR1P15   | 0.659254689 | Annotation Cluster 165 | Enrichment Score: 0.73                                                   | Count | P_Value  | Benjamini | ILMN_1660323 | PDXC1        | -0.465180109 |
| ILMN_1682928 | CPVL       | 0.659195443 | GOTERM_BP_FAT          | heme metabolic process                                                   | 7     | 6.00E-02 | 5.50E-01  | ILMN_1678246 | SLC25A32     | -0.465208692 |
| ILMN_1651354 | SPP1       | 0.659191842 | GOTERM_BP_FAT          | heme biosynthetic process                                                | 6     | 6.30E-02 | 5.60E-01  | ILMN_1752213 | TMEM60       | -0.465233708 |
| ILMN_1801833 | ARHGAP24   | 0.65907067  | GOTERM_BP_FAT          | leukotriene biosynthetic process                                         | 13    | 8.10E-02 | 6.20E-01  | ILMN_2189668 | NUOT11       | -0.465230638 |
| ILMN_1676128 | DNMT3A     | 0.65900758  | GOTERM_BP_FAT          | tetrapyrrole biosynthetic process                                        | 6     | 1.10E-01 | 7.20E-01  | ILMN_1807304 | MBNL1        | -0.465256516 |
| ILMN_1747903 | DNAI1      | 0.658741051 | GOTERM_BP_FAT          | porphyrin biosynthetic process                                           | 6     | 1.10E-01 | 7.20E-01  | ILMN_3282561 | LOC100132272 | -0.465334651 |
| ILMN_1774584 | C2orf28    | 0.658729134 | GOTERM_BP_FAT          | pigment metabolic process                                                | 10    | 1.30E-01 | 7.60E-01  | ILMN_1888015 | AIS25756     | -0.465352327 |
| ILMN_1653042 | HSDB87     | 0.658560962 | GOTERM_BP_FAT          | pigment biosynthetic process                                             | 9     | 1.30E-01 | 7.60E-01  | ILMN_1785615 | SUMO1P1      | -0.465386407 |
| ILMN_2143314 | SPB        | 0.658543569 | GOTERM_BP_FAT          | tetrapyrrole metabolic process                                           | 7     | 1.70E-01 | 8.30E-01  | ILMN_1729662 | LOC645485    | -0.465402467 |
| ILMN_2078389 | SLC4A2     | 0.658516728 | GOTERM_BP_FAT          | heme biosynthetic process                                                | 7     | 1.70E-01 | 8.30E-01  | ILMN_1657865 | PRK20        | -0.465453449 |
| ILMN_1761584 | NDUO2      | 0.658491422 | SP_PIR_KEYWORDS        | heme biosynthesis                                                        | 4     | 2.00E-01 | 6.30E-01  | ILMN_1717485 | AI832378     | -0.465565336 |
| ILMN_1754646 | CD63       | 0.658360794 | SP_PIR_KEYWORDS        | porphyrin biosynthesis                                                   | 3     | 3.40E-01 | 7.90E-01  | ILMN_3243414 | LOC100133161 | -0.465574713 |
| ILMN_1677104 | TRAF5      | 0.658153809 | GOTERM_BP_FAT          | cofactor biosynthetic process                                            | 13    | 6.40E-01 | 1.00E+00  | ILMN_2410371 | CD79A        | -0.465609942 |
| ILMN_2374159 | HERPUD1    | 0.658092516 | BIOCARTA               | Hemoglobin's Chaperone                                                   | 3     | 7.10E-01 | 1.00E+00  | ILMN_1715638 | GAGE8        | -0.465625119 |
| ILMN_1674160 | BIN1       | 0.65795398  | GOTERM_BP_FAT          | Porphyrin and chlorophyll metabolism                                     | 4     | 8.90E-01 | 9.70E-01  | ILMN_1853210 | AW117187     | -0.465626213 |
| ILMN_1777314 | CNPY4      | 0.657906899 | KEGG_PATHWAY           | heme biosynthesis                                                        | 6     | 1.56E-01 | 8.23E-01  | ILMN_1765310 | TGCL3        | -0.465712059 |
| ILMN_2234016 | FTH1       | 0.657648212 | Annotation Cluster 166 | Enrichment Score: 0.73                                                   | Count | P_Value  | Benjamini | ILMN_1752728 | FUC1A        | -0.465825871 |
| ILMN_1668185 | ZNF282     | 0.657619621 | UP_SEQ_FEATURE         | domain:MATH                                                              | 4     | 1.70E-01 | 1.00E+00  | ILMN_1706615 | SLC22A7      | -0.465833951 |
| ILMN_2358760 | HPN        | 0.657599453 | INTERPRO               | MATH                                                                     | 4     | 1.90E-01 | 9.90E-01  | ILMN_1741518 | LOC100128035 | -0.465848794 |
| ILMN_2289593 | FXYD2      | 0.65750512  | SMART                  | MATH                                                                     | 4     | 2.00E-01 | 9.00E-01  | ILMN_3248228 | PROX2        | -0.465880704 |
| ILMN_2129161 | LRR32      | 0.657495506 | Annotation Cluster 167 | Enrichment Score: 0.72                                                   | Count | P_Value  | Benjamini | ILMN_1849859 | BUS16091     | -0.465893234 |
| ILMN_1748767 | H3F3A      | 0.65747503  | GOTERM_MF_FAT          | phosphatidylinositol transporter activity                                | 3     | 1.30E-01 | 8.40E-01  | ILMN_1793088 | C7orf86      | -0.465904572 |
| ILMN_2399407 | PS         |             |                        |                                                                          |       |          |           |              |              |              |



|              |           |             |                        |                                                                                                     |       |          |           |
|--------------|-----------|-------------|------------------------|-----------------------------------------------------------------------------------------------------|-------|----------|-----------|
| ILMN_1740587 | RPS11     | 0.648719151 | INTERPRO               | <a href="#">PAK-box/P21-Rho-binding</a>                                                             | 5     | 1.80E-01 | 9.90E-01  |
| ILMN_2383306 | GPATCH4   | 0.648604602 | UP_SEQ_FEATURE         | domain:CRIB                                                                                         | 5     | 1.90E-01 | 1.00E+00  |
| ILMN_1697554 | SASH3     | 0.648502748 | SMART                  | <a href="#">PBC</a>                                                                                 | 5     | 2.10E-01 | 9.00E-01  |
| ILMN_1680824 | CREG1     | 0.648359421 | SP_PIR_KEYWORDS        | <a href="#">cell/adhase</a>                                                                         | 5     | 3.30E-01 | 7.80E-01  |
| ILMN_1600566 | RASSF4    | 0.648221133 | Annotation Cluster 183 | Enrichment Score: 0.65                                                                              | Count | P_Value  | Benjamini |
| ILMN_1651850 | RPS16     | 0.648245488 | UP_SEQ_FEATURE         | repeat:HA7 5                                                                                        | 4     | 1.40E-01 | 1.00E+00  |
| ILMN_2364022 | SLC16A3   | 0.648036352 | UP_SEQ_FEATURE         | repeat:HA7 4                                                                                        | 4     | 1.70E-01 | 1.00E+00  |
| ILMN_1790472 | SLC25A28  | 0.647999833 | UP_SEQ_FEATURE         | repeat:HA7 1                                                                                        | 4     | 2.00E-01 | 1.00E+00  |
| ILMN_1670561 | TCEAL8    | 0.647988804 | UP_SEQ_FEATURE         | repeat:HA7 3                                                                                        | 4     | 2.00E-01 | 1.00E+00  |
| ILMN_2364384 | PPARG     | 0.647935434 | UP_SEQ_FEATURE         | repeat:HA7 2                                                                                        | 4     | 2.00E-01 | 1.00E+00  |
| ILMN_1758798 | NPIPL2    | 0.647913515 | UP_SEQ_FEATURE         | repeat:HA7 7                                                                                        | 4     | 2.00E-01 | 1.00E+00  |
| ILMN_1657708 | MIGLL     | 0.647911016 | UP_SEQ_FEATURE         | repeat:HA7 6                                                                                        | 3     | 3.00E-01 | 1.00E+00  |
| ILMN_1674519 | ZP2       | 0.647888247 | INTERPRO               | <a href="#">RNA_processing_protein_HAT_hells</a>                                                    | 3     | 3.20E-01 | 1.00E+00  |
| ILMN_1767475 | CERK      | 0.647765033 | SMART                  | <a href="#">HAT</a>                                                                                 | 3     | 3.40E-01 | 9.60E-01  |
| ILMN_1763207 | BATF3     | 0.647678972 | Annotation Cluster 184 | Enrichment Score: 0.65                                                                              | Count | P_Value  | Benjamini |
| ILMN_1691127 | DNTT1P1   | 0.647501964 | GOTERM_BP_FAT          | <a href="#">branching_morphogenesis_of_a_tube</a>                                                   | 13    | 1.40E-01 | 7.80E-01  |
| ILMN_1780806 | ANKRD38B  | 0.647232295 | GOTERM_BP_FAT          | <a href="#">morphogenesis_of_a_branching_structure</a>                                              | 14    | 1.70E-01 | 8.20E-01  |
| ILMN_2325168 | ARRB1     | 0.64723057  | GOTERM_BP_FAT          | <a href="#">tube_development</a>                                                                    | 35    | 1.80E-01 | 8.40E-01  |
| ILMN_1659058 | PPP1R10   | 0.647122928 | GOTERM_BP_FAT          | <a href="#">patterning_of_blood_vessels</a>                                                         | 5     | 3.00E-01 | 9.30E-01  |
| ILMN_1690105 | STAT1     | 0.646980823 | GOTERM_BP_FAT          | <a href="#">tube_morphogenesis</a>                                                                  | 19    | 4.10E-01 | 9.70E-01  |
| ILMN_1656482 | OSBP-2    | 0.646980808 | Annotation Cluster 185 | Enrichment Score: 0.65                                                                              | Count | P_Value  | Benjamini |
| ILMN_1774202 | ANGPT2    | 0.646982108 | GOTERM_BP_FAT          | <a href="#">regulation_of_flied_kinase_activity</a>                                                 | 4     | 1.40E-01 | 7.70E-01  |
| ILMN_1811195 | ZNF211    | 0.646900036 | GOTERM_BP_FAT          | <a href="#">regulation_of_phosphoinositide_3-kinase_activity</a>                                    | 3     | 1.80E-01 | 8.40E-01  |
| ILMN_1666269 | CS2Z      | 0.646876047 | GOTERM_BP_FAT          | <a href="#">positive_regulation_of_phosphoinositide_3-kinase_activity</a>                           | 3     | 1.80E-01 | 8.40E-01  |
| ILMN_1766803 | TUBGCP6   | 0.646779075 | GOTERM_BP_FAT          | <a href="#">positive_regulation_of_flied_metabolic_process</a>                                      | 7     | 5.80E-01 | 9.90E-01  |
| ILMN_1689932 | WDRO8     | 0.646778371 | Annotation Cluster 186 | Enrichment Score: 0.64                                                                              | Count | P_Value  | Benjamini |
| ILMN_1749722 | NFIB13    | 0.64675413  | GOTERM_MF_FAT          | <a href="#">protein_binding</a>                                                                     | 19    | 5.30E-01 | 9.20E-01  |
| ILMN_1660341 | LRBP41    | 0.646660936 | GOTERM_MF_FAT          | <a href="#">SH3/SH2_adaptor_activity</a>                                                            | 8     | 4.40E-01 | 9.90E-01  |
| ILMN_1751328 | FAM83H    | 0.646649313 | GOTERM_MF_FAT          | <a href="#">molecular_adaptor_activity</a>                                                          | 10    | 5.00E-01 | 9.90E-01  |
| ILMN_3285819 | NA        | 0.64642578  | Annotation Cluster 187 | Enrichment Score: 0.64                                                                              | Count | P_Value  | Benjamini |
| ILMN_1743097 | XRCG5     | 0.646388804 | INTERPRO               | <a href="#">Troponomyosin</a>                                                                       | 3     | 8.00E-02 | 9.50E-01  |
| ILMN_1766185 | AXIN1     | 0.646235652 | GOTERM_CC_FAT          | <a href="#">muscle_thin_filament_troponomyosin</a>                                                  | 3     | 8.90E-02 | 4.70E-01  |
| ILMN_1728024 | TUBG2     | 0.646192909 | PIR_SUPERFAMILY        | <a href="#">PKR/002327_troponomyosin</a>                                                            | 3     | 9.00E-01 | 9.00E-01  |
| ILMN_1800261 | TUBA1B    | 0.646190746 | SP_PIR_KEYWORDS        | <a href="#">muscle_protein</a>                                                                      | 9     | 4.40E-01 | 8.60E-01  |
| ILMN_1730048 | C7orf26   | 0.646100155 | GOTERM_CC_FAT          | <a href="#">striated_muscle_thin_filament</a>                                                       | 3     | 6.10E-01 | 9.50E-01  |
| ILMN_1667551 | SMA4      | 0.646085609 | SP_PIR_KEYWORDS        | <a href="#">skeletal_muscle</a>                                                                     | 3     | 8.00E-01 | 9.90E-01  |
| ILMN_1652749 | ERF       | 0.646050754 | Annotation Cluster 188 | Enrichment Score: 0.64                                                                              | Count | P_Value  | Benjamini |
| ILMN_2361165 | TACC2     | 0.646049908 | GOTERM_BP_FAT          | <a href="#">phosphoinositide_phosphorylation</a>                                                    | 5     | 1.30E-01 | 7.50E-01  |
| ILMN_1803560 | LAT2      | 0.645981039 | GOTERM_BP_FAT          | <a href="#">local_phosphorylation</a>                                                               | 7     | 1.50E-01 | 8.00E-01  |
| ILMN_1703412 | LATS2     | 0.645927271 | UP_SEQ_FEATURE         | domain:FATC                                                                                         | 3     | 1.60E-01 | 1.00E+00  |
| ILMN_1691449 | CHCHD2    | 0.645829087 | UP_SEQ_FEATURE         | domain:PI3K/PIAK                                                                                    | 5     | 1.70E-01 | 1.00E+00  |
| ILMN_1666169 | NBR2      | 0.64571977  | INTERPRO               | <a href="#">PIK-related_kinase_FATC</a>                                                             | 3     | 1.70E-01 | 9.90E-01  |
| ILMN_1722820 | KDEL3B    | 0.645574177 | INTERPRO               | <a href="#">PIK-related_kinase</a>                                                                  | 3     | 1.70E-01 | 9.90E-01  |
| ILMN_1665554 | BRF2      | 0.645567397 | INTERPRO               | <a href="#">Phosphatidylinositol_3- and 4-kinase_conserved_site</a>                                 | 5     | 1.80E-01 | 9.00E-01  |
| ILMN_1731666 | ZNF441    | 0.645527447 | INTERPRO               | <a href="#">Phosphatidylinositol_3- and 4-kinase_catalytic</a>                                      | 5     | 1.80E-01 | 9.00E-01  |
| ILMN_2056551 | BRM02     | 0.645395367 | SMART                  | <a href="#">PI3K</a>                                                                                | 5     | 2.10E-01 | 9.00E-01  |
| ILMN_1689725 | RPLP1     | 0.645324939 | GOTERM_CC_FAT          | <a href="#">phosphoinositide_3-kinase_complex</a>                                                   | 3     | 4.90E-01 | 9.10E-01  |
| ILMN_2311166 | ITGB5     | 0.645162054 | KEGG_PATHWAY           | <a href="#">Type II diabetes mellitus</a>                                                           | 7     | 7.30E-01 | 9.10E-01  |
| ILMN_2298378 | NSUN5     | 0.645125427 | KEGG_PATHWAY           | <a href="#">mTOR signaling pathway</a>                                                              | 7     | 8.10E-01 | 9.30E-01  |
| ILMN_2369537 | RPS2      | 0.645118614 | Annotation Cluster 189 | Enrichment Score: 0.64                                                                              | Count | P_Value  | Benjamini |
| ILMN_1839341 | ING4      | 0.645115556 | GOTERM_BP_FAT          | <a href="#">response_to_vitamin_D</a>                                                               | 9     | 1.80E-01 | 8.40E-01  |
| ILMN_2194828 | CLIC6IF53 | 0.645004757 | GOTERM_BP_FAT          | <a href="#">response_to_vitamin_D</a>                                                               | 12    | 2.50E-01 | 9.00E-01  |
| ILMN_1727761 | GMEB1     | 0.644906018 | GOTERM_BP_FAT          | <a href="#">response_to_retinoic_acid</a>                                                           | 7     | 2.60E-01 | 9.20E-01  |
| ILMN_1778013 | PPDR      | 0.644781906 | Annotation Cluster 190 | Enrichment Score: 0.64                                                                              | Count | P_Value  | Benjamini |
| ILMN_2226763 | H2AFB2    | 0.644766692 | GOTERM_MF_FAT          | <a href="#">transforming_growth_factor_beta_binding</a>                                             | 4     | 1.30E-01 | 8.40E-01  |
| ILMN_2305721 | PMO1      | 0.644421239 | GOTERM_MF_FAT          | <a href="#">actin_binding</a>                                                                       | 4     | 1.60E-01 | 8.70E-01  |
| ILMN_1715332 | TTC21A    | 0.644098518 | GOTERM_MF_FAT          | <a href="#">transmembrane_receptor_protein_serine/threonine_kinase_activity</a>                     | 5     | 1.90E-01 | 9.00E-01  |
| ILMN_1734608 | ZNF77     | 0.644020008 | GOTERM_MF_FAT          | <a href="#">transforming_growth_factor_beta_receptor_activity</a>                                   | 5     | 1.90E-01 | 9.00E-01  |
| ILMN_1684663 | ZDHHC13   | 0.644014898 | GOTERM_MF_FAT          | <a href="#">type II transforming growth factor beta receptor binding</a>                            | 3     | 2.20E-01 | 9.30E-01  |
| ILMN_2370144 | CHD3      | 0.643992057 | GOTERM_MF_FAT          | <a href="#">transforming_growth_factor_beta_receptor_binding</a>                                    | 4     | 3.80E-01 | 9.80E-01  |
| ILMN_2300012 | NA        | 0.643770383 | GOTERM_MF_FAT          | <a href="#">SMAD_binding</a>                                                                        | 7     | 5.50E-01 | 9.90E-01  |
| ILMN_1722059 | SAFB      | 0.643514246 | Annotation Cluster 191 | Enrichment Score: 0.64                                                                              | Count | P_Value  | Benjamini |
| ILMN_1812769 | UBXN1     | 0.643509069 | GOTERM_CC_FAT          | <a href="#">basolateral_plasma_membrane</a>                                                         | 35    | 9.50E-02 | 4.80E-01  |
| ILMN_1769665 | RABS3     | 0.64348971  | GOTERM_CC_FAT          | <a href="#">cell-substrate_junction</a>                                                             | 20    | 1.60E-01 | 6.20E-01  |
| ILMN_1719237 | SPDYER8   | 0.64337813  | GOTERM_CC_FAT          | <a href="#">adherens_junction</a>                                                                   | 26    | 1.80E-01 | 6.50E-01  |
| ILMN_3307799 | PSMD4     | 0.643136118 | GOTERM_CC_FAT          | <a href="#">focal_adhesion</a>                                                                      | 18    | 2.00E-01 | 6.70E-01  |
| ILMN_1703053 | ZFP91     | 0.643070727 | GOTERM_CC_FAT          | <a href="#">cell-substrate_adherens_junction</a>                                                    | 18    | 2.40E-01 | 7.30E-01  |
| ILMN_1815874 | NANS      | 0.64306804  | GOTERM_CC_FAT          | <a href="#">anchoring_junction</a>                                                                  | 27    | 2.80E-01 | 7.60E-01  |
| ILMN_1652223 | WDR91     | 0.642961922 | GOTERM_CC_FAT          | <a href="#">cell_junction</a>                                                                       | 58    | 9.60E-01 | 1.00E+00  |
| ILMN_2328835 | IP6K2     | 0.642952858 | Annotation Cluster 192 | Enrichment Score: 0.63                                                                              | Count | P_Value  | Benjamini |
| ILMN_2320964 | ADAR      | 0.642809995 | GOTERM_MF_FAT          | <a href="#">histone_deacetylase_activity</a>                                                        | 5     | 1.20E-01 | 8.20E-01  |
| ILMN_2103930 | PDLG      | 0.642740054 | GOTERM_MF_FAT          | <a href="#">protein_deacetylase_activity</a>                                                        | 5     | 1.20E-01 | 8.20E-01  |
| ILMN_1676286 | R9PFB3A   | 0.642713365 | GOTERM_BP_FAT          | <a href="#">protein_amino_acid_deacetylation</a>                                                    | 6     | 1.50E-01 | 8.00E-01  |
| ILMN_2349129 | PPP3      | 0.642640033 | GOTERM_BP_FAT          | <a href="#">histone_deacetylation</a>                                                               | 5     | 1.80E-01 | 8.30E-01  |
| ILMN_1809889 | CDC117    | 0.642577425 | GOTERM_MF_FAT          | <a href="#">histone_deacetylation</a>                                                               | 5     | 1.90E-01 | 9.00E-01  |
| ILMN_2357976 | CDX398    | 0.642577256 | GOTERM_BP_FAT          | <a href="#">chromatin_silencing</a>                                                                 | 5     | 2.10E-01 | 8.70E-01  |
| ILMN_1788377 | COL27A1   | 0.642557904 | Annotation Cluster 193 | Enrichment Score: 0.63                                                                              | Count | P_Value  | Benjamini |
| ILMN_2047112 | DPCC      | 0.642517811 | COG_ONTOLOGY           | <a href="#">Chromatin structure and dynamics / Secondary metabolites</a>                            | 3     | 2.10E-01 | 9.50E-01  |
| ILMN_2134062 | ALKB3     | 0.641789203 | GOTERM_BP_FAT          | <a href="#">biosynthesis_transport_and_catabolism</a>                                               | 5     | 3.00E-01 | 9.30E-01  |
| ILMN_1691131 | LSMD1     | 0.641742692 | UP_SEQ_FEATURE         | <a href="#">negative_regulation_of_gene_expression_eigenetic</a>                                    | 3     | 3.50E-01 | 1.00E+00  |
| ILMN_1813025 | AK125786  | 0.641719946 | INTERPRO               | <a href="#">region_of_interest:histone_deacetylase</a>                                              | 3     | 4.10E-01 | 1.00E+00  |
| ILMN_1779071 | FEZ1      | 0.641513956 | GOTERM_MF_FAT          | <a href="#">hydrolase_activity_acting_on_carbon-nitrogen_bond_not_oxides_bonds_in_linear_amides</a> | 7     | 7.70E-01 | 1.00E+00  |
| ILMN_2151277 | LPGAT1    | 0.641485064 | Annotation Cluster 193 | Enrichment Score: 0.63                                                                              | Count | P_Value  | Benjamini |
| ILMN_2056032 | CD99      | 0.641476689 | GOTERM_CC_FAT          | <a href="#">vacuolar_pant</a>                                                                       | 13    | 1.40E-01 | 5.70E-01  |
| ILMN_1812067 | REK1      | 0.641472642 | GOTERM_CC_FAT          | <a href="#">lysosomal_membrane</a>                                                                  | 6     | 2.90E-01 | 7.80E-01  |
| ILMN_1690802 | TRMT112   | 0.641450614 | GOTERM_CC_FAT          | <a href="#">vacuolar_membrane</a>                                                                   | 10    | 3.30E-01 | 8.10E-01  |
| ILMN_1702065 | MMS05     | 0.641366445 | Annotation Cluster 194 | Enrichment Score: 0.62                                                                              | Count | P_Value  | Benjamini |
| ILMN_1716800 | CLB       | 0.641237401 | BIOCARTA               | <a href="#">Activation_of_Cdk_by_GAMP-dependent_Protein_Kinase_inhibitor</a>                        | 8     | 3.10E-02 | 9.40E-01  |
| ILMN_1713301 | DGCR2     | 0.641171187 | BIOCARTA               | <a href="#">Signaling_through_the_T_Cell_Receptor</a>                                               | 6     | 4.40E-02 | 9.10E-01  |
| ILMN_2325506 | BCAS4     | 0.641168308 | KEGG_PATHWAY           | <a href="#">Lck_and_Fyn_tyrosine_kinases_in_Induction_of_TCR_Activation</a>                         | 8     | 1.30E-01 | 4.90E-01  |
| ILMN_1687037 | IFT140    | 0.640999966 | BIOCARTA               | <a href="#">Asthma</a>                                                                              | 5     | 1.50E-01 | 9.30E-01  |
| ILMN_2367964 | IFP2      | 0.640923742 | BIOCARTA               | <a href="#">E_Lymphocyte_Cell_Surface_Molecules</a>                                                 | 4     | 1.90E-01 | 9.30E-01  |
| ILMN_2383772 | GAPDH     | 0.640852421 | BIOCARTA               | <a href="#">Bystander_Cell_Activation</a>                                                           | 4     | 4.20E-01 | 9.70E-01  |
| ILMN_1699440 | ZBT847    | 0.640730326 | BIOCARTA               | <a href="#">Antigen_Dependent_B_Cell_Activation</a>                                                 | 5     | 5.20E-01 | 9.80E-01  |
|              |           |             |                        | <a href="#">The_Co-Stimulatory_Signal_During_T-cell_Activation</a>                                  | 5     | 5.20E-01 | 9.80E-01  |

|              |           |              |              |           |              |
|--------------|-----------|--------------|--------------|-----------|--------------|
| ILMN_1726967 | TWSG1     | -0.47004142  | ILMN_1726967 | TWSG1     | -0.47004142  |
| ILMN_1810107 | C17orf74  | -0.468054119 | ILMN_1810107 | C17orf74  | -0.468054119 |
| ILMN_1691181 | TM1X      | -0.470125971 | ILMN_1691181 | TM1X      | -0.470125971 |
| ILMN_1809543 | SCD11     | -0.470107777 | ILMN_1809543 | SCD11     | -0.470107777 |
| ILMN_1688240 | PHOSPHO1  | -0.470177798 | ILMN_1688240 | PHOSPHO1  | -0.470177798 |
| ILMN_1692762 | NA        | -0.470233624 | ILMN_1692762 | NA        | -0.470233624 |
| ILMN_1670245 | KLF3      | -0.470269252 | ILMN_1670245 | KLF3      | -0.470269252 |
| ILMN_3269956 | NA        | -0.470305978 | ILMN_3269956 | NA        | -0.470305978 |
| ILMN_1726701 | BC038536  | -0.470319984 | ILMN_1726701 | BC038536  | -0.470319984 |
| ILMN_1707845 | SAC6A2    | -0.470326618 | ILMN_1707845 | SAC6A2    | -0.470326618 |
| ILMN_1881598 | AW451138  | -0.47039514  | ILMN_1881598 | AW451138  | -0.47039514  |
| ILMN_1837271 | CA449813  | -0.470425997 | ILMN_1837271 | CA449813  | -0.470425997 |
| ILMN_1746428 | RGPD1     | -0.470431857 | ILMN_1746428 | RGPD1     | -0.470431857 |
| ILMN_1745949 | CEACAM21  | -0.470562241 | ILMN_1745949 | CEACAM21  | -0.470562241 |
| ILMN_1671890 | UBTF1     | -0.470572197 | ILMN_1671890 | UBTF1     | -0.470572197 |
| ILMN_1787974 | BNF       | -0.470589425 | ILMN_1787974 | BNF       | -0.470589425 |
| ILMN_1885728 | KIAA1147  | -0.470634556 | ILMN_1885728 | KIAA1147  | -0.470634556 |
| ILMN_1870923 | AI125404  | -0.470648949 | ILMN_1870923 | AI125404  | -0.470648949 |
| ILMN_3304072 | PRG4      | -0.470650171 | ILMN_3304072 | PRG4      | -0.470650171 |
| ILMN_1833175 | CD242195  | -0.470660412 | ILMN_1833175 | CD242195  | -0.470660412 |
| ILMN_1514674 | KRTAP25-3 | -0.470678994 | ILMN_1514674 | KRTAP25-3 | -0.470678994 |
| ILMN_1808163 | C11orf24  | -0.47071481  | ILMN_1808163 | C11orf24  | -0.47071481  |
| ILMN_1662413 | HGSNAT    | -0.470745829 | ILMN_1662413 | HGSNAT    | -0.470745829 |
| ILMN_1696183 | HBO1      | -0.470804271 | ILMN_1696183 | HBO1      | -0.470804271 |
| ILMN_1671547 | HMG2A     | -0.470814597 | ILMN_1671547 | HMG2A     | -0.470814597 |
| ILMN_1736546 | SLC16A14  | -0.470840134 | ILMN_1736546 | SLC16A14  | -0.470840134 |
| ILMN_1714219 | FOLB1     | -0.470888854 | ILMN_1714219 | FOLB1     | -0.470888854 |
| ILMN_1695181 | SCRIB     | -0.47089567  | ILMN_1695181 | SCRIB     | -0.47089567  |
| ILMN_1772214 | CRYBA1    | -0.470958407 | ILMN_1772214 | CRYBA1    | -0.470958407 |
| ILMN_1861915 | CA392115  | -0.470972771 | ILMN_1861915 | CA392115  | -0.470972771 |
| ILMN_2145781 | RBMY2FP   | -0.471052682 | ILMN_2145781 | RBMY2FP   | -0.471052682 |
| ILMN_1734552 | LRRCD2    | -0.471073155 | ILMN_1734552 | LRRCD2    | -0.471073155 |
| ILMN_1704374 | BC04335   |              |              |           |              |

|              |           |             |                        |                                                                                                                                                                  |       |          |           |
|--------------|-----------|-------------|------------------------|------------------------------------------------------------------------------------------------------------------------------------------------------------------|-------|----------|-----------|
| ILMN_1675038 | PRMT2     | 0.640461759 | BIOCARTA               | <a href="#">IL5 Signaling Pathway</a>                                                                                                                            | 3     | 6.00E-01 | 9.90E-01  |
| ILMN_2311989 | CUTA      | 0.640418616 | BIOCARTA               | <a href="#">Th1/Th2 Differentiation</a>                                                                                                                          | 3     | 9.20E-01 | 1.00E+00  |
| ILMN_1812721 | HIP1R     | 0.640279458 | BIOCARTA               | <a href="#">Cytokines and Inflammatory Response</a>                                                                                                              | 3     | 9.70E-01 | 1.00E+00  |
| ILMN_1789775 | WDR74     | 0.640277022 | Annotation Cluster 195 | <b>Enrichment Score: 0.62</b><br><a href="#">DNA damage response, signal transduction by p53 class mediator resulting in transcription of p21 class mediator</a> | Count | P_Value  | Benjamini |
| ILMN_1680104 | SLC35C1   | 0.640264772 | GOTERM_BP_FAT          | <a href="#">DNA damage response, signal transduction by p53 class mediator resulting in transcription</a>                                                        | 3     | 2.30E-01 | 8.90E-01  |
| ILMN_1810560 | NUPR1     | 0.640214158 | GOTERM_BP_FAT          | <a href="#">DNA damage response, signal transduction by p53 class mediator</a>                                                                                   | 3     | 2.30E-01 | 8.90E-01  |
| ILMN_1739946 | WDR1      | 0.640204728 | GOTERM_BP_FAT          | <a href="#">DNA damage response, signal transduction by p53 class mediator</a>                                                                                   | 6     | 2.50E-01 | 9.10E-01  |
| ILMN_1701621 | TYMP      | 0.640118228 | Annotation Cluster 196 | <b>Enrichment Score: 0.62</b><br><a href="#">fructose binding</a>                                                                                                | Count | P_Value  | Benjamini |
| ILMN_1689160 | DPEP2     | 0.640066393 | GOTERM_MF_FAT          | <a href="#">fructose metabolic process</a>                                                                                                                       | 3     | 1.70E-01 | 8.90E-01  |
| ILMN_3297945 | UBA1      | 0.640064819 | GOTERM_BP_FAT          | <a href="#">alcohol/alcohol dehydrogenase activity</a>                                                                                                           | 5     | 1.80E-01 | 8.30E-01  |
| ILMN_3309398 | SKK1      | 0.640042001 | GOTERM_MF_FAT          | <a href="#">fructose and mannose metabolism</a>                                                                                                                  | 3     | 2.20E-01 | 9.30E-01  |
| ILMN_1801383 | SMG1      | 0.639976237 | KEGG_PATHWAY           | <a href="#">carbohydrate kinase activity</a>                                                                                                                     | 8     | 2.40E-01 | 5.90E-01  |
| ILMN_1715169 | HLA-DRA1  | 0.639780211 | GOTERM_MF_FAT          |                                                                                                                                                                  | 4     | 4.80E-01 | 9.90E-01  |
| ILMN_2399264 | sept-06   | 0.639688081 | Annotation Cluster 197 | <b>Enrichment Score: 0.61</b><br><a href="#">response to lipopolydisaccharide</a>                                                                                | Count | P_Value  | Benjamini |
| ILMN_1676036 | TUBBP5    | 0.639590345 | GOTERM_BP_FAT          | <a href="#">response to molecule of bacterial origin</a>                                                                                                         | 15    | 1.30E-01 | 7.60E-01  |
| ILMN_3234841 | RPL23AP7  | 0.639342661 | GOTERM_BP_FAT          | <a href="#">response to bacterium</a>                                                                                                                            | 16    | 1.60E-01 | 8.00E-01  |
| ILMN_1669722 | MTX1      | 0.639324629 | GOTERM_BP_FAT          |                                                                                                                                                                  | 24    | 7.30E-01 | 1.00E+00  |
| ILMN_1669911 | FTH1      | 0.639234777 | Annotation Cluster 198 | <b>Enrichment Score: 0.6</b><br><a href="#">stress fiber</a>                                                                                                     | Count | P_Value  | Benjamini |
| ILMN_1660292 | MRF21     | 0.63924818  | GOTERM_CC_FAT          | <a href="#">actin filament bundle</a>                                                                                                                            | 6     | 2.10E-01 | 6.80E-01  |
| ILMN_1747204 | HTRA2     | 0.639062979 | GOTERM_CC_FAT          | <a href="#">actomyosin</a>                                                                                                                                       | 6     | 2.60E-01 | 7.50E-01  |
| ILMN_1761566 | Csrf32    | 0.639011137 | GOTERM_CC_FAT          |                                                                                                                                                                  | 6     | 2.90E-01 | 7.80E-01  |
| ILMN_1651819 | GALNT11   | 0.638855253 | Annotation Cluster 199 | <b>Enrichment Score: 0.6</b><br><a href="#">insulin-like growth factor binding protein</a>                                                                       | Count | P_Value  | Benjamini |
| ILMN_1807283 | MDR1      | 0.638844663 | GOTERM_MF_FAT          | <a href="#">Growth factor binding</a>                                                                                                                            | 5     | 9.20E-01 | 7.60E-01  |
| ILMN_1794522 | EIF5A     | 0.638839659 | SP_PIR_KEYWORDS        | <a href="#">Insulin-like growth factor binding protein</a>                                                                                                       | 5     | 1.20E-01 | 4.80E-01  |
| ILMN_1681356 | PDE2A     | 0.638809858 | INTERPRO               | <a href="#">domain:Thyroglobulin type-1</a>                                                                                                                      | 3     | 1.70E-01 | 9.90E-01  |
| ILMN_1745533 | FAM117A   | 0.638766839 | UP_SEQ_FEATURE         | <a href="#">UP_SEQ_FEATURE</a>                                                                                                                                   | 4     | 2.00E-01 | 1.00E+00  |
| ILMN_1763842 | PRFH1     | 0.638661536 | UP_SEQ_FEATURE         | <a href="#">UP_SEQ_FEATURE</a>                                                                                                                                   | 5     | 2.20E-01 | 1.00E+00  |
| ILMN_3237636 | CL6orf67  | 0.638605602 | INTERPRO               | <a href="#">UP_SEQ_FEATURE</a>                                                                                                                                   | 5     | 2.40E-01 | 1.00E+00  |
| ILMN_1800420 | RNF214    | 0.638613084 | SMART                  | <a href="#">UP_SEQ_FEATURE</a>                                                                                                                                   | 5     | 2.70E-01 | 9.30E-01  |
| ILMN_1667716 | TMEM101   | 0.63860242  | INTERPRO               | <a href="#">UP_SEQ_FEATURE</a>                                                                                                                                   | 4     | 3.60E-01 | 1.00E+00  |
| ILMN_2302358 | ABCC5     | 0.638320677 | SMART                  | <a href="#">UP_SEQ_FEATURE</a>                                                                                                                                   | 4     | 3.90E-01 | 9.60E-01  |
| ILMN_1659024 | TMCC2     | 0.638141021 | INTERPRO               | <a href="#">UP_SEQ_FEATURE</a>                                                                                                                                   | 3     | 4.60E-01 | 1.00E+00  |
| ILMN_2386354 | C5NK2A1   | 0.638134384 | BIOCARTA               | <a href="#">UP_SEQ_FEATURE</a>                                                                                                                                   | 3     | 7.50E-01 | 1.00E+00  |
| ILMN_1685928 | WDR34     | 0.638101024 | Annotation Cluster 200 | <b>Enrichment Score: 0.6</b><br><a href="#">cell motion</a>                                                                                                      | Count | P_Value  | Benjamini |
| ILMN_1718129 | MAP2K5    | 0.638005281 | GOTERM_BP_FAT          | <a href="#">cell migration</a>                                                                                                                                   | 73    | 1.10E+00 | 7.10E+01  |
| ILMN_3214532 | RPL21     | 0.637949219 | GOTERM_BP_FAT          | <a href="#">localization of cell</a>                                                                                                                             | 41    | 2.80E-01 | 9.30E-01  |
| ILMN_1713749 | CORO1A    | 0.637824404 | GOTERM_BP_FAT          | <a href="#">cell motility</a>                                                                                                                                    | 44    | 3.60E-01 | 9.60E-01  |
| ILMN_1738420 | TMEM201   | 0.637698654 | GOTERM_BP_FAT          |                                                                                                                                                                  | 44    | 3.60E-01 | 9.60E-01  |
| ILMN_1725414 | ABCC6     | 0.637550532 | Annotation Cluster 201 | <b>Enrichment Score: 0.6</b><br><a href="#">antiport</a>                                                                                                         | Count | P_Value  | Benjamini |
| ILMN_1710344 | TRCD1D10C | 0.63752807  | SP_PIR_KEYWORDS        | <a href="#">solute/hydrogen antiporter activity</a>                                                                                                              | 8     | 1.40E-01 | 5.20E-01  |
| ILMN_1767066 | SMAD3     | 0.637468623 | GOTERM_MF_FAT          | <a href="#">solute/cation antiporter activity</a>                                                                                                                | 7     | 1.60E-01 | 9.80E-01  |
| ILMN_2331205 | CHXB      | 0.637166824 | GOTERM_MF_FAT          | <a href="#">antipporter activity</a>                                                                                                                             | 7     | 1.80E-01 | 8.90E-01  |
| ILMN_1717078 | DNAIC16   | 0.637107692 | GOTERM_MF_FAT          | <a href="#">Cation/Na+ exchanger</a>                                                                                                                             | 12    | 2.50E-01 | 9.50E-01  |
| ILMN_2161746 | TRIP10    | 0.637068321 | INTERPRO               | <a href="#">solute/solute antiporter activity</a>                                                                                                                | 4     | 2.60E-01 | 1.00E+00  |
| ILMN_1671295 | MST15     | 0.63697052  | GOTERM_MF_FAT          | <a href="#">cation/solute antiporter activity</a>                                                                                                                | 9     | 3.90E-01 | 9.80E-01  |
| ILMN_2342630 | LPHN1     | 0.636968514 | GOTERM_MF_FAT          |                                                                                                                                                                  | 3     | 6.60E-01 | 1.00E+00  |
| ILMN_1790244 | C22orf2   | 0.636915292 | Annotation Cluster 202 | <b>Enrichment Score: 0.59</b><br><a href="#">I-gg-binding protein</a>                                                                                            | Count | P_Value  | Benjamini |
| ILMN_1683802 | RPL5D1    | 0.63682451  | SP_PIR_KEYWORDS        | <a href="#">I-gg binding</a>                                                                                                                                     | 3     | 2.00E-01 | 6.30E-01  |
| ILMN_1710571 | PAP05     | 0.636868402 | GOTERM_MF_FAT          | <a href="#">immunoglobulin binding</a>                                                                                                                           | 3     | 2.70E-01 | 9.60E-01  |
| ILMN_2395285 | SNRNP35   | 0.636796035 | GOTERM_MF_FAT          |                                                                                                                                                                  | 4     | 3.00E-01 | 9.60E-01  |
| ILMN_1736575 | TRIM28    | 0.63665085  | Annotation Cluster 203 | <b>Enrichment Score: 0.59</b><br><a href="#">zinc finger region:C3H1-type 2</a>                                                                                  | Count | P_Value  | Benjamini |
| ILMN_1796762 | CCDC102A  | 0.636502033 | UP_SEQ_FEATURE         | <a href="#">zinc finger region:C3H1-type 1</a>                                                                                                                   | 7     | 1.50E-01 | 1.00E+00  |
| ILMN_1680991 | RNF7      | 0.636494984 | UP_SEQ_FEATURE         | <a href="#">zinc finger region:C3H1-type 3</a>                                                                                                                   | 5     | 2.20E-01 | 1.00E+00  |
| ILMN_2178775 | ZNF5858   | 0.636432    | UP_SEQ_FEATURE         | <a href="#">Zinc finger, CCHC-type</a>                                                                                                                           | 9     | 3.30E-01 | 1.00E+00  |
| ILMN_1677237 | CHCHD2    | 0.636380577 | INTERPRO               | <a href="#">Znf_C3H1</a>                                                                                                                                         | 9     | 3.80E-01 | 9.70E-01  |
| ILMN_1707783 | CCDC72    | 0.636344863 | SMART                  | <a href="#">zinc finger region:C3H1-type 4</a>                                                                                                                   | 3     | 4.80E-01 | 1.00E+00  |
| ILMN_2354649 | SRF1D     | 0.636288732 | Annotation Cluster 204 | <b>Enrichment Score: 0.59</b><br><a href="#">Endometrial cancer</a>                                                                                              | Count | P_Value  | Benjamini |
| ILMN_1701538 | AF1       | 0.636267556 | KEGG_PATHWAY           | <a href="#">Acute myeloid leukemia</a>                                                                                                                           | 13    | 8.00E-02 | 3.70E-01  |
| ILMN_1751958 | NSLNS     | 0.636238946 | KEGG_PATHWAY           | <a href="#">Non-small cell lung cancer</a>                                                                                                                       | 14    | 8.50E-02 | 3.80E-01  |
| ILMN_1876778 | AH181986  | 0.636125063 | KEGG_PATHWAY           | <a href="#">ErbB signaling pathway</a>                                                                                                                           | 12    | 1.80E-01 | 5.50E-01  |
| ILMN_1670096 | NRPB1     | 0.636123175 | KEGG_PATHWAY           | <a href="#">Chronic myeloid leukemia</a>                                                                                                                         | 17    | 2.20E-01 | 5.90E-01  |
| ILMN_1661888 | MEF2A     | 0.635826579 | KEGG_PATHWAY           | <a href="#">Glycans</a>                                                                                                                                          | 15    | 2.30E-01 | 5.80E-01  |
| ILMN_2354617 | TYRKB18   | 0.635806682 | KEGG_PATHWAY           | <a href="#">Prostate cancer</a>                                                                                                                                  | 13    | 2.30E-01 | 5.80E-01  |
| ILMN_1756598 | CDCD      | 0.635770368 | KEGG_PATHWAY           | <a href="#">Trefoll Factors Initiate Mucosal Healing</a>                                                                                                         | 14    | 5.90E-01 | 8.40E-01  |
| ILMN_1736863 | TMEM140   | 0.635741966 | KEGG_PATHWAY           | <a href="#">Melanoma</a>                                                                                                                                         | 5     | 6.40E-01 | 9.90E-01  |
| ILMN_1729433 | LPH       | 0.635610849 | BIOCARTA               |                                                                                                                                                                  | 7     | 9.70E-01 | 9.90E-01  |
| ILMN_1664541 | POLR2J4   | 0.635376507 | KEGG_PATHWAY           | Annotation Cluster 205                                                                                                                                           | Count | P_Value  | Benjamini |
| ILMN_2211800 | HMG1      | 0.635340699 | GOTERM_MF_FAT          | <b>Enrichment Score: 0.58</b><br><a href="#">tumor necrosis factor receptor superfamily binding</a>                                                              | 9     | 3.80E-02 | 5.30E-01  |
| ILMN_1709795 | RAC1      | 0.635233284 | GOTERM_MF_FAT          | <a href="#">tumor necrosis factor receptor binding</a>                                                                                                           | 9     | 9.00E-02 | 4.10E-01  |
| ILMN_2328221 | ANKRD36   | 0.635198669 | GOTERM_MF_FAT          | <a href="#">Tumor Necrosis Factor</a>                                                                                                                            | 3     | 6.50E-01 | 1.00E+00  |
| ILMN_2386016 | C2orf28   | 0.635089333 | INTERPRO               | <a href="#">TNE</a>                                                                                                                                              | 3     | 6.80E-01 | 9.90E-01  |
| ILMN_2336752 | COA53     | 0.635076305 | SMART                  | Annotation Cluster 206                                                                                                                                           | Count | P_Value  | Benjamini |
| ILMN_2396991 | HCT       | 0.635041369 | Annotation Cluster 206 | <b>Enrichment Score: 0.58</b><br><a href="#">heterotrimer</a>                                                                                                    | Count | P_Value  | Benjamini |
| ILMN_1651776 | FHD01     | 0.634911931 | SP_PIR_KEYWORDS        | <a href="#">basement membrane</a>                                                                                                                                | 9     | 1.50E-02 | 1.30E-01  |
| ILMN_1813682 | MRP153    | 0.634909454 | SP_PIR_KEYWORDS        | <a href="#">domain:Laminin G-like 2</a>                                                                                                                          | 9     | 9.00E-02 | 4.10E-01  |
| ILMN_1767373 | SMN4      | 0.634905945 | UP_SEQ_FEATURE         | <a href="#">domain:Laminin G-like 1</a>                                                                                                                          | 7     | 1.30E-01 | 1.00E+00  |
| ILMN_1666409 | PSMB6     | 0.634878959 | UP_SEQ_FEATURE         | <a href="#">Laminin egf-like domain</a>                                                                                                                          | 7     | 1.30E-01 | 1.00E+00  |
| ILMN_1718771 | CDC2C4    | 0.634843087 | SP_PIR_KEYWORDS        | <a href="#">Concanavalin A-like lectin/glycanase, subroup</a>                                                                                                    | 7     | 1.40E-01 | 5.40E-01  |
| ILMN_1777725 | LSM14B    | 0.634811991 | INTERPRO               | <a href="#">domain:Laminin EGF-like 1</a>                                                                                                                        | 14    | 1.70E-01 | 9.90E-01  |
| ILMN_1682960 | DTNBP1    | 0.634762046 | UP_SEQ_FEATURE         | <a href="#">domain:Laminin EGF-like 12</a>                                                                                                                       | 6     | 2.00E-01 | 1.00E+00  |
| ILMN_2361807 | OS9       | 0.634706209 | UP_SEQ_FEATURE         | <a href="#">domain:Laminin EGF-like 13</a>                                                                                                                       | 3     | 2.00E-01 | 1.00E+00  |
| ILMN_1712708 | TRIM47    | 0.634684848 | UP_SEQ_FEATURE         | <a href="#">domain:Laminin G-like 3</a>                                                                                                                          | 3     | 2.00E-01 | 1.00E+00  |
| ILMN_1769473 | SETD2     | 0.634566993 | UP_SEQ_FEATURE         | <a href="#">Laminin G, subdomain 1</a>                                                                                                                           | 5     | 2.20E-01 | 1.00E+00  |
| ILMN_2099487 | CL1orf108 | 0.634399624 | INTERPRO               | <a href="#">domain:Laminin EGF-like 2</a>                                                                                                                        | 3     | 2.20E-01 | 1.00E+00  |
| ILMN_2410713 | IFGR4     | 0.634056766 | UP_SEQ_FEATURE         | <a href="#">domain:Laminin EGF-like 2</a>                                                                                                                        | 6     | 2.20E-01 | 1.00E+00  |
| ILMN_3301749 | SPNS2     | 0.633923257 | UP_SEQ_FEATURE         | <a href="#">domain:Laminin G-like 4</a>                                                                                                                          | 4     | 2.70E-01 | 1.00E+00  |
| ILMN_1695356 | RNF166    | 0.633745788 | UP_SEQ_FEATURE         | <a href="#">domain:Laminin G-like 5</a>                                                                                                                          | 3     | 3.00E-01 | 1.00E+00  |
| ILMN_1792312 | FOXED1    | 0.633738443 | UP_SEQ_FEATURE         | <a href="#">domain:Laminin EGF-like 11</a>                                                                                                                       | 3     | 3.00E-01 | 1.00E+00  |
| ILMN_1790625 | CBX3      | 0.633642355 | UP_SEQ_FEATURE         | <a href="#">domain:Laminin N-terminal</a>                                                                                                                        | 4     | 3.00E-01 | 1.00E+00  |
| ILMN_3176040 | RPS27A    | 0.63363912  | INTERPRO               | <a href="#">Laminin, N-terminal</a>                                                                                                                              | 4     | 3.30E-01 | 1.00E+00  |
| ILMN_3273456 | PABPC4    | 0.633604509 | INTERPRO               | <a href="#">Laminin G</a>                                                                                                                                        | 8     | 3.40E-01 | 1.00E+00  |
| ILMN_1722491 | ARPT      | 0.633582626 | GOTERM_CC_FAT          | <a href="#">Laminin complex</a>                                                                                                                                  | 3     | 3.40E-01 | 8.20E-01  |
| ILMN_1761962 | SRF5      | 0.633472161 | UP_SEQ_FEATURE         | <a href="#">domain:Laminin EGF-like 9</a>                                                                                                                        | 3     | 3.60E-01 | 1.00E+00  |
| ILMN_1740298 | SGILECS   | 0.633368091 | SMART                  | <a href="#">Lamin</a>                                                                                                                                            | 4     | 3.60E-01 | 9.60E-01  |
| ILMN_2413779 | SEZL2     | 0.633328612 | SMART                  | <a href="#">LaminG</a>                                                                                                                                           | 8     | 3.80E-01 | 9.70E-01  |

|              |              |              |              |              |              |
|--------------|--------------|--------------|--------------|--------------|--------------|
| ILMN_1735792 | RHBD2        | -0.47393291  | ILMN_1805720 | SDHAF1       | -0.474196797 |
| ILMN_1680276 | ZNF354C      | -0.474207661 | ILMN_1718107 | MAGEA12      | -0.474373924 |
| ILMN_1671997 | LOC388428    | -0.474382216 | ILMN_1851906 | AW665857     | -0.474389706 |
| ILMN_220421  | GCSH         | -0.474403659 | ILMN_1719083 | OR56A3       | -0.474481903 |
| ILMN_1801491 | SLC26A2      | -0.474556968 | ILMN_1882355 | AAK70148     | -0.474668734 |
| ILMN_1797204 | WDR64        | -0.474652961 | ILMN_1813620 | PARRP        | -0.474684817 |
| ILMN_1813620 | PARRP        | -0.474684817 | ILMN_1804277 | SPRED1       | -0.474880007 |
| ILMN_1810945 | CYP2F1       | -0.474711759 | ILMN_2399431 | PRPS2        | -0.474736164 |
| ILMN_1683817 | UBE2Q2       | -0.474750651 | ILMN_1683717 | OGC1         | -0.474783317 |
| ILMN_2263718 | SPAG9        | -0.474783317 | ILMN_1804277 | SPRED1       | -0.474880007 |
| ILMN_1683717 | OGC1         | -0.474880007 | ILMN_1663518 | FAM153A      | -0.47494422  |
| ILMN_1804277 | SPRED1       | -0.474880007 | ILMN_1701933 | SNCA         | -0.474954669 |
| ILMN_1663518 | FAM153A      | -0.47494422  | ILMN_1709768 | LOC100128818 | -0.47502575  |
| ILMN_1709768 | LOC100128818 | -0.47502575  | ILMN_1709937 | KN4N4        | -0.475037004 |
| ILMN_1709937 | KN4N4        | -0.475037004 | ILMN_1767413 | TBC1D1       | -0.475071976 |
| ILMN_1816395 | CR736179     | -0.475104769 | ILMN_1681395 | CR736179     | -0.475104769 |
| ILMN_1675221 | DGKZ         | -0.47511494  | ILMN_1687315 | RXRA         | -0.475209409 |
| ILMN_1687315 | RXRA         | -0.475209409 | ILMN_1735195 | PRAMEF10     | -0.475231117 |
| ILMN_1735195 | PRAMEF10     | -0.475231117 | ILMN_1681053 | LOC100124692 | -0.475258856 |
| ILMN_1681053 | LOC100124692 | -0.475258856 | ILMN_2330011 | CHN1         | -0.475271491 |
| ILMN_2330011 | CHN1         | -0.475271491 | ILMN_2242901 | RUFY3        | -0.475300143 |
| ILMN_194755  | BE780475     | -0.475309642 | ILMN_1666617 | C6orf155     | -0.475310114 |
| ILMN_1666617 | C6orf155     | -0.475310114 | ILMN_1785795 | METAP1       | -0.475392807 |
| ILMN_1785795 | METAP1       | -0.475392807 | ILMN_1793201 | HARGH        | -0.475488259 |
| ILMN_1793201 | HARGH        | -0.475488259 | ILMN_1761646 | CPROB        | -0.475513349 |
| ILMN_1761646 | CPROB        | -0.475513349 | ILMN_1720113 | PTPRO        | -0.47554397  |
| ILMN_1720113 | PTPRO        | -0.47554397  | ILMN_2295511 | LUC7L        | -0.475560967 |
| ILMN_2295511 | LUC7L        | -0.475560967 | ILMN_1710873 | ZNF330       | -0.475584244 |
| ILMN_1710873 | ZNF330       | -0.475584244 | ILMN_1653504 | SIFP1        | -0.475612704 |
| ILMN_1653504 | SIFP1        | -0.475612704 | ILMN_2306537 | UBTF1L       | -0.475718774 |
| ILMN_2306537 | UBTF1L       | -0.475718774 | ILMN_1656799 | FAM75D3      | -0.475792148 |
| ILMN_1656799 |              |              |              |              |              |

|              |          |             |                        |                                                                                |       |          |           |
|--------------|----------|-------------|------------------------|--------------------------------------------------------------------------------|-------|----------|-----------|
| ILMN_1757604 | TPM2     | 0.633319315 | UP_SEQ_FEATURE         | domainLaminin EGF-like 8                                                       | 3     | 3.90E-01 | 1.00E+00  |
| ILMN_1711566 | TIMP1    | 0.633212006 | UP_SEQ_FEATURE         | domainLaminin EGF-like 1D                                                      | 3     | 3.90E-01 | 1.00E+00  |
| ILMN_2408645 | SPC2     | 0.633097681 | GOTERM_CC_FAT          | basal lamina                                                                   | 4     | 4.00E-01 | 8.00E-01  |
| ILMN_2360313 | CRYBA2   | 0.632745288 | INTERPRO               | EGF-like domain                                                                | 7     | 4.20E-01 | 1.00E+00  |
| ILMN_1670948 | TSR2     | 0.632711628 | UP_SEQ_FEATURE         | domainLaminin EGF-like 7                                                       | 3     | 3.40E-01 | 1.00E+00  |
| ILMN_1732717 | FAM71E1  | 0.632684355 | INTERPRO               | Laminin G subdomain 2                                                          | 7     | 4.40E-01 | 1.00E+00  |
| ILMN_3307950 | CKSRAP3  | 0.632539428 | SMART                  | EGF_Lam                                                                        | 7     | 4.60E-01 | 9.70E-01  |
| ILMN_1805737 | PKPK     | 0.632511352 | GOTERM_CC_FAT          | basement membrane                                                              | 12    | 4.70E-01 | 9.00E-01  |
| ILMN_1782741 | CD300LB  | 0.632347788 | UP_SEQ_FEATURE         | domainLaminin EGF-like 4                                                       | 3     | 3.40E-01 | 1.00E+00  |
| ILMN_1802574 | NLL2     | 0.632327022 | UP_SEQ_FEATURE         | domainLaminin EGF-like 6                                                       | 3     | 4.80E-01 | 1.00E+00  |
| ILMN_1745573 | TTC13    | 0.632198832 | UP_SEQ_FEATURE         | domainLaminin EGF-like 3                                                       | 4     | 5.10E-01 | 1.00E+00  |
| ILMN_1745787 | POLL     | 0.632127813 | Annotation Cluster 207 | Enrichment Score: 0.58                                                         | Count | P_Value  | Benjamini |
| ILMN_2059211 | KIAA0195 | 0.632066416 | BIOCARTA               | Role of ERKs in Neuronal Survival                                              | 7     | 2.50E-02 | 9.70E-01  |
| ILMN_1670844 | OPN3     | 0.632029846 | BIOCARTA               | TPO Signaling Pathway                                                          | 8     | 7.30E-02 | 9.40E-01  |
| ILMN_1794533 | POU2F1   | 0.632022883 | BIOCARTA               | FGF/FGF2 Mapk Signaling pathway                                                | 10    | 9.00E-02 | 9.50E-01  |
| ILMN_2088124 | TMEM154  | 0.632022516 | BIOCARTA               | Nerve growth factor pathway (NGF)                                              | 7     | 9.20E-02 | 9.20E-01  |
| ILMN_1747622 | CD33     | 0.631911285 | BIOCARTA               | PDGF Signaling Pathway                                                         | 9     | 9.20E-02 | 9.00E-01  |
| ILMN_1717737 | FKBP7    | 0.631692684 | BIOCARTA               | ERBB2 in Signal Transduction and Oncology                                      | 8     | 9.30E-02 | 8.80E-01  |
| ILMN_1780825 | NRAS     | 0.631667707 | BIOCARTA               | T Cell Receptor Signaling Pathway                                              | 11    | 1.00E-01 | 8.90E-01  |
| ILMN_1657283 | ALKRH5   | 0.631644826 | BIOCARTA               | IGF-1 Signaling Pathway                                                        | 7     | 1.40E-01 | 9.30E-01  |
| ILMN_1667408 | EPB41    | 0.631512362 | BIOCARTA               | EGF Signaling pathway                                                          | 7     | 1.40E-01 | 9.30E-01  |
| ILMN_1797384 | URO5     | 0.631518903 | BIOCARTA               | Eg Epiloin Receptor 1 Signaling in Mast Cells                                  | 9     | 2.10E-01 | 9.30E-01  |
| ILMN_1805665 | FLRT3    | 0.631500397 | BIOCARTA               | EGF Signaling Pathway                                                          | 8     | 2.20E-01 | 9.40E-01  |
| ILMN_1716651 | RUNX2    | 0.631329228 | BIOCARTA               | BCR Signaling Pathway                                                          | 8     | 2.20E-01 | 9.40E-01  |
| ILMN_1775999 | ATAT1    | 0.631328563 | BIOCARTA               | EPO Signaling Pathway                                                          | 6     | 2.60E-01 | 9.40E-01  |
| ILMN_2205050 | PRRX     | 0.631309903 | BIOCARTA               | Inhibition of Cellular Proliferation by Glioxen                                | 6     | 3.00E-01 | 9.60E-01  |
| ILMN_1696035 | PRP29    | 0.631292897 | BIOCARTA               | Insulin Signaling Pathway                                                      | 6     | 3.00E-01 | 9.60E-01  |
| ILMN_2342485 | TUK2     | 0.631292722 | BIOCARTA               | Role of MAL in Rho-Mediated Activation of SRE                                  | 6     | 3.00E-01 | 9.60E-01  |
| ILMN_2318811 | RANBP3   | 0.631218311 | BIOCARTA               | Signaling of Hepatocyte Growth Factor Receptor                                 | 9     | 3.30E-01 | 9.50E-01  |
| ILMN_3209399 | KRT18    | 0.631169044 | BIOCARTA               | Trka Receptor Signaling Pathway                                                | 4     | 3.60E-01 | 9.60E-01  |
| ILMN_1690682 | B3GALT4  | 0.631008398 | BIOCARTA               | Growth Hormone Signaling Pathway                                               | 6     | 4.30E-01 | 9.70E-01  |
| ILMN_1665583 | TUBB     | 0.630842464 | BIOCARTA               | Serpinolytic regulation of tyrosine kinase signals                             | 4     | 5.80E-01 | 9.90E-01  |
| ILMN_1789642 | DNAJC5   | 0.630812919 | BIOCARTA               | IL-3 signaling pathway                                                         | 5     | 6.00E-01 | 9.90E-01  |
| ILMN_1748093 | PAFAH1B3 | 0.630735107 | BIOCARTA               | Angiotensin II mediated activation of JNK Pathway via Pyk2 dependent signaling | 6     | 6.20E-01 | 9.90E-01  |
| ILMN_1656826 | SH3RF1   | 0.630601495 | BIOCARTA               | Links between Pyk2 and Map Kinases                                             | 5     | 7.70E-01 | 1.00E+00  |
| ILMN_1679655 | WDR82    | 0.63057194  | BIOCARTA               | IL-3 signaling pathway                                                         | 3     | 7.90E-01 | 1.00E+00  |
| ILMN_1808435 | OGT      | 0.630433502 | BIOCARTA               | Signaling Pathway from G-Protein Families                                      | 4     | 8.00E-01 | 1.00E+00  |
| ILMN_1775224 | NDS3     | 0.630409413 | BIOCARTA               | Insulin Signaling Pathway                                                      | 6     | 8.20E-01 | 1.00E+00  |
| ILMN_1805512 | WDR13    | 0.630297603 | BIOCARTA               | Bioactive Peptide Induced Signaling Pathway                                    | 5     | 8.60E-01 | 1.00E+00  |
| ILMN_1799387 | INO80    | 0.630285592 | BIOCARTA               | Mitf induced chemokine gene expression in HMC-1 cells                          | 4     | 8.90E-01 | 1.00E+00  |
| ILMN_1810559 | RHOQ     | 0.63016679  | Annotation Cluster 208 | Enrichment Score: 0.58                                                         | Count | P_Value  | Benjamini |
| ILMN_3225784 | LAMRIP15 | 0.630147187 | GOTERM_BP_FAT          | actin filament-based movement                                                  | 6     | 1.80E-01 | 8.30E-01  |
| ILMN_2160476 | CLC2     | 0.630108488 | GOTERM_MF_FAT          | actin-dependent ATPase activity                                                | 3     | 2.70E-01 | 9.80E-01  |
| ILMN_1784651 | NAG4     | 0.630097984 | GOTERM_BP_FAT          | cytoskeleton-dependent intracellular transport                                 | 9     | 3.80E-01 | 9.60E-01  |
| ILMN_1686254 | FAM127B  | 0.629889324 | Annotation Cluster 209 | Enrichment Score: 0.58                                                         | Count | P_Value  | Benjamini |
| ILMN_1708375 | IRF1     | 0.629661595 | GOTERM_BP_FAT          | negative regulation of phosphatase activity                                    | 3     | 8.70E-02 | 6.40E-01  |
| ILMN_1700031 | PRAME    | 0.629475057 | GOTERM_BP_FAT          | regulation of dephosphorylation                                                | 6     | 2.50E-01 | 9.10E-01  |
| ILMN_1796316 | MMF9     | 0.629456365 | GOTERM_BP_FAT          | regulation of phosphatase activity                                             | 4     | 4.30E-01 | 9.80E-01  |
| ILMN_2366066 | MS4      | 0.629429647 | GOTERM_BP_FAT          | regulation of phosphoprotein phosphatase activity                              | 3     | 5.30E-01 | 9.40E+00  |
| ILMN_1735254 | HST1D2AB | 0.629366542 | Annotation Cluster 210 | Enrichment Score: 0.58                                                         | Count | P_Value  | Benjamini |
| ILMN_3240793 | OR2A4    | 0.629280973 | GOTERM_BP_FAT          | regulation of interleukin-2 production                                         | 9     | 3.60E-02 | 4.20E-01  |
| ILMN_1770388 | VP539    | 0.629272951 | GOTERM_BP_FAT          | regulation of interleukin-2 biosynthetic process                               | 5     | 2.40E-01 | 8.90E-01  |
| ILMN_1760779 | ENSA     | 0.629116444 | GOTERM_BP_FAT          | positive regulation of cytokine biosynthetic process                           | 8     | 4.50E-01 | 9.80E-01  |
| ILMN_1778199 | POLL     | 0.629092078 | GOTERM_BP_FAT          | positive regulation of interleukin-2 biosynthetic process                      | 3     | 5.30E-01 | 9.90E-01  |
| ILMN_1664644 | ATG16L2  | 0.628866171 | GOTERM_BP_FAT          | regulation of cytokine biosynthetic process                                    | 10    | 6.50E-01 | 1.00E+00  |
| ILMN_1713605 | RP491    | 0.628861016 | Annotation Cluster 211 | Enrichment Score: 0.57                                                         | Count | P_Value  | Benjamini |
| ILMN_2046856 | RP515    | 0.628699157 | GOTERM_BP_FAT          | UV protection                                                                  | 5     | 4.60E-02 | 4.80E-01  |
| ILMN_1765459 | S100A13  | 0.628694702 | GOTERM_BP_FAT          | nucleotide-excision repair, DNA incision                                       | 3     | 1.80E-01 | 8.40E-01  |
| ILMN_2141398 | VEZT     | 0.628692364 | SP_PIR_KEYWORDS        | verodermis pigmentosum                                                         | 3     | 2.50E-01 | 6.90E-01  |
| ILMN_1802203 | ARF1     | 0.628646144 | GOTERM_BP_FAT          | response to UV                                                                 | 10    | 3.70E-01 | 9.60E-01  |
| ILMN_1674036 | IC24Y    | 0.628565156 | GOTERM_BP_FAT          | nucleotide-excision repair                                                     | 9     | 4.00E-01 | 9.80E-01  |
| ILMN_3273198 | NA       | 0.628544975 | KEGG_PATHWAY           | Nucleotide excision repair                                                     | 8     | 5.00E-01 | 8.10E-01  |
| ILMN_2404049 | RBM38    | 0.628471469 | GOTERM_BP_FAT          | nucleotide-excision repair, DNA damage removal                                 | 4     | 5.70E-01 | 9.90E-01  |
| ILMN_1748438 | POLR2G   | 0.628450546 | Annotation Cluster 212 | Enrichment Score: 0.57                                                         | Count | P_Value  | Benjamini |
| ILMN_1692539 | SH3BP1   | 0.628403344 | UP_SEQ_FEATURE         | domainFCP1 homology                                                            | 3     | 2.50E-01 | 1.00E+00  |
| ILMN_2286568 | ANKRD36  | 0.628341658 | INTERPRO               | NLI interacting factor                                                         | 3     | 2.70E-01 | 1.00E+00  |
| ILMN_1783606 | NLL5     | 0.628214752 | SMART                  | OPS                                                                            | 3     | 2.90E-01 | 9.40E-01  |
| ILMN_1762316 | CP5F3L   | 0.628092066 | Annotation Cluster 213 | Enrichment Score: 0.57                                                         | Count | P_Value  | Benjamini |
| ILMN_3228585 | SLC35E2B | 0.628075528 | KEGG_PATHWAY           | Dilated cardiomyopathy                                                         | 19    | 1.40E-01 | 4.90E-01  |
| ILMN_1659845 | KIAA0355 | 0.627971069 | KEGG_PATHWAY           | Arrhythmogenic right ventricular cardiomyopathy (ARVC)                         | 14    | 3.50E-01 | 7.00E-01  |
| ILMN_3262031 | BRD7     | 0.627886224 | KEGG_PATHWAY           | Hypertrophic cardiomyopathy (HCM)                                              | 15    | 4.00E-01 | 7.40E-01  |
| ILMN_2138435 | MRF5Z7   | 0.627859046 | Annotation Cluster 214 | Enrichment Score: 0.57                                                         | Count | P_Value  | Benjamini |
| ILMN_1694731 | CLCN7    | 0.62756474  | GOTERM_BP_FAT          | regulation of specific transcription from RNA polymerase II promoter           | 17    | 1.70E-01 | 8.20E-01  |
| ILMN_1732151 | COL6A1   | 0.627479873 | GOTERM_BP_FAT          | positive regulation of specific transcription from RNA polymerase II promoter  | 11    | 2.10E-01 | 8.70E-01  |
| ILMN_1676302 | FAM113A  | 0.627434723 | GOTERM_BP_FAT          | positive regulation of gene-specific transcription                             | 15    | 2.50E-01 | 9.10E-01  |
| ILMN_2373062 | RHBDP2   | 0.627426734 | GOTERM_BP_FAT          | negative regulation of specific transcription from RNA polymerase II promoter  | 8     | 2.90E-01 | 9.30E-01  |
| ILMN_2352190 | CLIP2    | 0.627369784 | GOTERM_BP_FAT          | regulation of gene-specific transcription                                      | 21    | 3.10E-01 | 9.40E-01  |
| ILMN_1719835 | OSCP1    | 0.627332289 | GOTERM_BP_FAT          | negative regulation of gene-specific transcription                             | 8     | 4.50E-01 | 9.80E-01  |
| ILMN_1787312 | C6orf88  | 0.627149775 | Annotation Cluster 215 | Enrichment Score: 0.57                                                         | Count | P_Value  | Benjamini |
| ILMN_1698015 | TRX1     | 0.627112489 | GOTERM_BP_FAT          | regulation of axonogenesis                                                     | 14    | 3.20E-01 | 8.20E-01  |
| ILMN_3211302 | RPL17    | 0.627052608 | GOTERM_BP_FAT          | negative regulation of cell projection organization                            | 6     | 3.10E-01 | 9.40E-01  |
| ILMN_2347693 | NCOA3    | 0.627025326 | GOTERM_BP_FAT          | negative regulation of axonogenesis                                            | 5     | 4.20E-01 | 9.80E-01  |
| ILMN_1709486 | SRPX     | 0.626789186 | GOTERM_BP_FAT          | negative regulation of neurogenesis                                            | 7     | 5.90E-01 | 9.90E-01  |
| ILMN_1659792 | HXX09    | 0.626687339 | GOTERM_BP_FAT          | negative regulation of cell development                                        | 7     | 6.20E-01 | 1.00E+00  |
| ILMN_1661138 | GON4L    | 0.626296389 | Annotation Cluster 216 | Enrichment Score: 0.56                                                         | Count | P_Value  | Benjamini |
| ILMN_1673469 | IKO5J1   | 0.626265491 | GOTERM_MF_FAT          | Rho GTPase binding                                                             | 9     | 1.10E-01 | 8.10E-01  |
| ILMN_1663618 | STAT3    | 0.626227495 | GOTERM_MF_FAT          | GTPase binding                                                                 | 17    | 3.20E-01 | 9.70E-01  |
| ILMN_1710524 | PARO3    | 0.62626597  | GOTERM_MF_FAT          | Bas GTPase binding                                                             | 14    | 3.90E-01 | 9.80E-01  |
| ILMN_2075334 | HST1H4C  | 0.6261659   | GOTERM_MF_FAT          | small GTPase binding                                                           | 15    | 4.20E-01 | 9.90E-01  |
| ILMN_3237733 | CASP8    | 0.626149099 | Annotation Cluster 217 | Enrichment Score: 0.56                                                         | Count | P_Value  | Benjamini |
| ILMN_2334210 | ITGB4    | 0.626020906 | UP_SEQ_FEATURE         | domainLIM zinc-binding 3                                                       | 6     | 1.80E-01 | 1.00E+00  |
| ILMN_1811754 | ITGB2    | 0.626009762 | SP_PIR_KEYWORDS        | LIM domain                                                                     | 12    | 2.30E-01 | 6.70E-01  |
| ILMN_2154840 | RAB43    | 0.62598587  | UP_SEQ_FEATURE         | domainLIM zinc-binding 1                                                       | 9     | 2.50E-01 | 1.00E+00  |
| ILMN_1740170 | CHCHD10  | 0.625863693 | UP_SEQ_FEATURE         | domainLIM zinc-binding 2                                                       | 9     | 2.50E-01 | 1.00E+00  |

|              |           |              |              |           |              |
|--------------|-----------|--------------|--------------|-----------|--------------|
| ILMN_2202967 | ARL15     | -0.478566998 | ILMN_1656940 | ALBUM3    | -0.47858447  |
| ILMN_2304577 | KCNK7     | -0.478553948 | ILMN_1752646 | NA        | -0.478534718 |
| ILMN_1840483 | C12orf71  | -0.478683397 | ILMN_1765645 | C17orf50  | -0.478697378 |
| ILMN_2058141 | HMG2C     | -0.478765255 | ILMN_1787531 | MAPKBIP2  | -0.478767575 |
| ILMN_3222574 | PKRCE     | -0.478776715 | ILMN_1752646 | NA        | -0.478765478 |
| ILMN_1752646 | NA        | -0.478765478 | ILMN_1777797 | AFM       | -0.478925253 |
| ILMN_1786631 | SIX6      | -0.478970804 | ILMN_2290089 | UBN1      | -0.479183682 |
| ILMN_2044645 | CGBI      | -0.478994848 | ILMN_1737283 | TMSB15B   | -0.47924153  |
| ILMN_1752646 | NA        | -0.478994848 | ILMN_1679295 | ARL5C     | -0.479202097 |
| ILMN_2290089 | UBN1      | -0.479183682 | ILMN_2415949 | MRRF      | -0.479390461 |
| ILMN_1737283 | TMSB15B   | -0.47924153  | ILMN_1690703 | C21orf34  | -0.479474718 |
| ILMN_1679295 | ARL5C     | -0.479202097 | ILMN_1657455 | CEACAM4   | -0.479481595 |
| ILMN_2415949 | MRRF      | -0.479390461 | ILMN_1657455 | CEACAM4   | -0.479481595 |
| ILMN_1690703 | C21orf34  | -0.479474718 | ILMN_1651347 | SERTAD2   | -0.479554431 |
| ILMN_1657455 | CEACAM4   | -0.479481595 | ILMN_1679535 | ESR1      | -0.479562232 |
| ILMN_1651347 | SERTAD2   | -0.479554431 | ILMN_1788267 | PPP1R14D  | -0.47956753  |
| ILMN_1679535 | ESR1      | -0.479562232 | ILMN_2093027 | MYO1B     | -0.479590758 |
| ILMN_1788267 | PPP1R14D  | -0.47956753  | ILMN_1720496 | GUCY1A2   | -0.479632385 |
| ILMN_2093027 | MYO1B     | -0.479590758 | ILMN_1734762 | OPA3      | -0.479646497 |
| ILMN_1720496 | GUCY1A2   | -0.479632385 | ILMN_1732151 | EBF6      | -0.479923407 |
| ILMN_1734762 | OPA3      | -0.479646497 | ILMN_1833478 | AV700714  | -0.479679436 |
| ILMN_1732151 | EBF6      | -0.479923407 | ILMN_2181992 | MTRF1     | -0.479758204 |
| ILMN_1833478 | AV700714  | -0.479679436 | ILMN_2052487 | GPR45     | -0.479839027 |
| ILMN_2181992 | MTRF1     | -0.479758204 | ILMN_1699384 | PPP2R5D   | -0.47985094  |
| ILMN_2052487 | GPR45     | -0.479839027 | ILMN_1660865 | AIDA      | -0.479860684 |
| ILMN_1699384 | PPP2R5D   | -0.47985094  | ILMN_1667374 | C14orf149 | -0.479993939 |
| ILMN_1660865 | AIDA      | -0.479860684 | ILMN_1685696 | C3orf55   | -0.480089797 |
| ILMN_1667374 | C14orf149 | -0.479993939 | ILMN_1900604 | BX108309  | -0.480116146 |
| ILMN_1685696 | C3orf55   | -0.480089797 | ILMN_2195721 | KRTAP21-1 | -0.480139906 |
| ILMN_1900604 | BX108309  | -0.480116146 | ILMN_2239408 | ANG       | -0.480202203 |
| ILMN_2195721 | KRTAP21-1 | -0.480139906 | ILMN_1779961 | TGGA1NAH3 | -0.480211648 |
| ILMN_2239408 | ANG       | -0.480202203 | ILMN_1755882 | RNF219    | -0.480264477 |
| ILMN_1779961 | TGGA1NAH3 | -0.480211648 | ILMN_2233552 | POLD3     | -0.480310962 |
| ILMN_1755882 | RNF219    | -0.480264477 | ILMN_2156971 | PRY       | -0.480356111 |
| ILMN_2233552 | POLD3     | -0.480310962 | ILMN_1722532 | KDM3A     | -0.480375155 |
| ILMN_2156971 | PRY       | -0.480356111 | ILMN_1729632 | PGL2      | -0.48039032  |
| ILMN_1722532 | KDM3A     | -0.480375155 | ILMN_2075174 | SGO5      | -0.480430264 |
| ILMN_1729632 | PGL2      | -0.48039032  | ILMN_1704135 | LOC828242 | -0.48043877  |

|              |                |             |                        |                                                                         |       |           |           |              |               |              |
|--------------|----------------|-------------|------------------------|-------------------------------------------------------------------------|-------|-----------|-----------|--------------|---------------|--------------|
| ILMN_2345837 | CLTA           | 0.625797514 | INTERPRO               | <a href="#">Zinc finger, LIM-type</a>                                   | 12    | 3.10E-01  | 1.00E+00  | ILMN_1687046 | OR10A2        | -0.482291791 |
| ILMN_1792473 | AF1            | 0.625785042 | SMART                  | <a href="#">LIM</a>                                                     | 12    | 3.70E-01  | 9.60E-01  | ILMN_2154603 | ZNF830        | -0.48234456  |
| ILMN_1708167 | CDCP1          | 0.625774857 | UP_SEQ_FEATURE         | <a href="#">domain:Lim zinc-binding 4</a>                               | 3     | 3.90E-01  | 1.00E+00  | ILMN_2163835 | PRDM14        | -0.482390407 |
| ILMN_1763877 | ANP3P          | 0.625719521 | Enrichment Score: 0.55 |                                                                         | Count | P_Value   | Benjamini | ILMN_2366355 | LOC1011       | -0.48241216  |
| ILMN_1677226 | ARVCF          | 0.625349346 | GOTERM_BP_FAT          | <a href="#">virus-host interaction</a>                                  | 5     | 2.70E-01  | 9.20E-01  | ILMN_1798914 | C1orf65       | -0.482470499 |
| ILMN_1804117 | FAM99B         | 0.625106039 | GOTERM_BP_FAT          | <a href="#">intracellular viral mRNA export from host nucleus</a>       | 3     | 2.90E-01  | 9.30E-01  | ILMN_1893915 | AW195332      | -0.482482882 |
| ILMN_1716400 | FOXM1          | 0.62490057  | GOTERM_CC_FAT          | <a href="#">transcription export complex</a>                            | 3     | 2.90E-01  | 7.80E-01  | ILMN_2204726 | UBR5          | -0.482624114 |
| ILMN_1809323 | C9orf125       | 0.62481904  | Enrichment Score: 0.55 |                                                                         | Count | P_Value   | Benjamini | ILMN_1760246 | BSN           | -0.482688544 |
| ILMN_1737755 | C22orf136      | 0.624774209 | GOTERM_BP_FAT          | <a href="#">positive regulation of tumor necrosis factor production</a> | 5     | 1.30E-01  | 7.50E-01  | ILMN_2494844 | POM121-like 1 | -0.482715865 |
| ILMN_2347661 | FLJ45301       | 0.624768496 | GOTERM_MF_FAT          | <a href="#">antibody gene binding</a>                                   | 3     | 3.30E-01  | 9.70E-01  | ILMN_1767639 | C22orf1       | -0.482732776 |
| ILMN_1750429 | DKFZp686E14208 | 0.624763973 | GOTERM_BP_FAT          | <a href="#">regulation of tumor necrosis factor production</a>          | 6     | 3.90E-01  | 9.70E-01  | ILMN_2540466 | BI999339      | -0.482827776 |
| ILMN_3224856 | LOC101133161   | 0.624760764 | GOTERM_BP_FAT          | <a href="#">positive regulation of cytokine production</a>              | 14    | 4.10E-01  | 9.70E-01  | ILMN_1656495 | NOTO          | -0.482918493 |
| ILMN_3272768 | HSPC157        | 0.624693038 | Enrichment Score: 0.55 |                                                                         | Count | P_Value   | Benjamini | ILMN_2073263 | C11orf61      | -0.482928147 |
| ILMN_2402972 | GGAG           | 0.624672294 | INTERPRO               | <a href="#">Phosphorylated immunoreceptor signaling ITAM</a>            | 3     | 2.70E-01  | 1.00E+00  | ILMN_1897107 | A056628       | -0.483026736 |
| ILMN_1715508 | NM11           | 0.624649278 | SMART                  | <a href="#">ITAM</a>                                                    | 3     | 2.90E-01  | 9.40E-01  | ILMN_1676239 | LOC35550      | -0.48307145  |
| ILMN_2311779 | TMB2           | 0.624490175 | UP_SEQ_FEATURE         | <a href="#">domain:ITAM</a>                                             | 3     | 3.00E-01  | 1.00E+00  | ILMN_1892906 | BQ11293       | -0.483130494 |
| ILMN_1689389 | SF385          | 0.624402482 | Enrichment Score: 0.55 |                                                                         | Count | P_Value   | Benjamini | ILMN_1789112 | TMEM145       | -0.483306092 |
| ILMN_1740620 | LOC1615127     | 0.624360526 | UP_SEQ_FEATURE         | <a href="#">DNA-binding region:AT hook</a>                              | 5     | 4.80E-02  | 1.00E+00  | ILMN_2114185 | C1orf104      | -0.483338188 |
| ILMN_2358457 | ATF4           | 0.624244953 | INTERPRO               | <a href="#">AT hook, DNA-binding, conserved site</a>                    | 4     | 6.80E-01  | 1.00E+00  | ILMN_1800935 | ARV1          | -0.483354924 |
| ILMN_3198464 | BCO33580       | 0.624215975 | SMART                  | <a href="#">AT hook</a>                                                 | 4     | 7.10E-01  | 9.90E-01  | ILMN_1663129 | MAMLD1        | -0.483388175 |
| ILMN_2109416 | NAP5B          | 0.624179514 | Enrichment Score: 0.54 |                                                                         | Count | P_Value   | Benjamini | ILMN_1798166 | POM121C       | -0.483419832 |
| ILMN_1803997 | SODCAG3        | 0.62414951  | INTERPRO               | <a href="#">Low density lipoprotein receptor class A, cysteine-rich</a> | 12    | 4.40E-02  | 9.10E-01  | ILMN_1686405 | KDR           | -0.483474217 |
| ILMN_3214945 | SMN1           | 0.623998723 | SMART                  | <a href="#">LDL</a>                                                     | 12    | 5.80E-02  | 7.20E-01  | ILMN_1736300 | KIAA1445      | -0.483485054 |
| ILMN_3229324 | SGK1           | 0.623964063 | UP_SEQ_FEATURE         | <a href="#">domain:LDL-receptor class A 1</a>                           | 6     | 2.20E-01  | 1.00E+00  | ILMN_1738009 | PRRT4         | -0.483507903 |
| ILMN_1659843 | DNAIC3         | 0.62396074  | UP_SEQ_FEATURE         | <a href="#">domain:LDL-receptor class A 2</a>                           | 6     | 2.20E-01  | 1.00E+00  | ILMN_1736162 | GC            | -0.483562334 |
| ILMN_1676963 | TMEM87B        | 0.623884029 | UP_SEQ_FEATURE         | <a href="#">domain:LDL-receptor class A 4</a>                           | 4     | 3.00E-01  | 1.00E+00  | ILMN_1770658 | NEB           | -0.483591972 |
| ILMN_1769578 | CLCA4          | 0.62355159  | UP_SEQ_FEATURE         | <a href="#">domain:LDL-receptor class A</a>                             | 4     | 4.799E-01 | 1.00E+00  | ILMN_1798023 | MPH1          | -0.483616367 |
| ILMN_1781959 | ABC72          | 0.623505721 | UP_SEQ_FEATURE         | <a href="#">domain:CUB 1</a>                                            | 6     | 4.50E-01  | 1.00E+00  | ILMN_1804907 | OR1F2         | -0.483646653 |
| ILMN_1766593 | PHRF1          | 0.623462305 | UP_SEQ_FEATURE         | <a href="#">domain:CUB 2</a>                                            | 6     | 4.50E-01  | 1.00E+00  | ILMN_1798690 | ADAMTSL3      | -0.483650903 |
| ILMN_1685125 | CR626459       | 0.623278424 | UP_SEQ_FEATURE         | <a href="#">domain:LDL-receptor class A 3</a>                           | 4     | 4.80E-01  | 1.00E+00  | ILMN_1685043 | CYP3A7        | -0.48381583  |
| ILMN_1714352 | DMWD           | 0.623214998 | INTERPRO               | <a href="#">CUB</a>                                                     | 6     | 7.90E-01  | 1.00E+00  | ILMN_1747205 | JDP2          | -0.483875267 |
| ILMN_1793959 | ADPKC          | 0.623188836 | SMART                  | <a href="#">CUB</a>                                                     | 6     | 8.20E-01  | 1.00E+00  | ILMN_1655892 | BE26556       | -0.483911115 |
| ILMN_1703743 | ATF7           | 0.62318371  | Enrichment Score: 0.54 |                                                                         | Count | P_Value   | Benjamini | ILMN_1654636 | CYP2A13       | -0.48395752  |
| ILMN_2049303 | EC11           | 0.623176948 | GOTERM_BP_FAT          | <a href="#">cell activation during immune response</a>                  | 8     | 1.90E-01  | 8.50E-01  | ILMN_1840934 | A1420430      | -0.484005614 |
| ILMN_1746408 | MIDN           | 0.622996925 | GOTERM_BP_FAT          | <a href="#">leukocyte activation during immune response</a>             | 8     | 1.90E-01  | 8.50E-01  | ILMN_2287543 | SH3A3         | -0.484009161 |
| ILMN_2383097 | RPL17          | 0.622989389 | GOTERM_BP_FAT          | <a href="#">leukocyte degranulation</a>                                 | 4     | 2.00E-01  | 8.70E-01  | ILMN_1797878 | OR7G3         | -0.48406013  |
| ILMN_1794213 | ABHD14A        | 0.622606644 | GOTERM_BP_FAT          | <a href="#">leukocyte activation during immune response</a>             | 5     | 2.10E-01  | 8.70E-01  | ILMN_1701386 | STRADB        | -0.484131496 |
| ILMN_1691090 | MPF17          | 0.622507077 | GOTERM_BP_FAT          | <a href="#">cell activation during immune response</a>                  | 4     | 2.40E-01  | 9.00E-01  | ILMN_1739925 | SICRBA1       | -0.484175517 |
| ILMN_1769578 | CLCA4          | 0.62235159  | GOTERM_BP_FAT          | <a href="#">myeloid leukocyte mediated immunity</a>                     | 6     | 2.076E-01 | 9.00E-01  | ILMN_2076723 | OR45A2        | -0.484203627 |
| ILMN_1671005 | HFE2P2         | 0.622301276 | GOTERM_BP_FAT          | <a href="#">myeloid leukocyte activation</a>                            | 8     | 4.00E-01  | 9.70E-01  | ILMN_1762582 | ARNT          | -0.48421571  |
| ILMN_1705991 | SMA4           | 0.62218908  | GOTERM_BP_FAT          | <a href="#">regulated secretory pathway</a>                             | 4     | 4.30E-01  | 9.80E-01  | ILMN_1723414 | HACL1         | -0.484254684 |
| ILMN_1677534 | SCAP           | 0.622158998 | GOTERM_BP_FAT          | <a href="#">myeloid cell activation during immune response</a>          | 3     | 7.10E-01  | 1.00E+00  | ILMN_1747151 | ANKRD23       | -0.484305847 |
| ILMN_1723480 | BST2           | 0.621860309 | Enrichment Score: 0.54 |                                                                         | Count | P_Value   | Benjamini | ILMN_1713550 | IGR6          | -0.484320001 |
| ILMN_2364131 | TTPAL          | 0.621797408 | GOTERM_MF_FAT          | <a href="#">ubiquitin binding</a>                                       | 6     | 2.60E-01  | 9.50E-01  | ILMN_1737515 | HSP90AA1      | -0.484335026 |
| ILMN_3305194 | LOC102         | 0.621683804 | GOTERM_MF_FAT          | <a href="#">small cytoplasmic protein binding</a>                       | 6     | 2.60E-01  | 9.50E-01  | ILMN_1680434 | COC104        | -0.48433129  |
| ILMN_2415936 | THOC3          | 0.621612402 | GOTERM_MF_FAT          | <a href="#">polyubiquitin binding</a>                                   | 3     | 3.30E-01  | 9.70E-01  | ILMN_1662010 | DNX2          | -0.484441682 |
| ILMN_3235044 | LOC10288615    | 0.621563462 | Enrichment Score: 0.53 |                                                                         | Count | P_Value   | Benjamini | ILMN_1806473 | BEX5          | -0.484443842 |
| ILMN_1705737 | IMPDH2         | 0.621411295 | GOTERM_BP_FAT          | <a href="#">apoptotic mitochondrial changes</a>                         | 8     | 1.00E-01  | 7.00E-01  | ILMN_1729529 | BA1           | -0.484451211 |
| ILMN_1695414 | ASF1B          | 0.621357769 | BBID                   | <a href="#">127.Mito-stress</a>                                         | 4     | 1.50E-01  | 9.60E-01  | ILMN_2164173 | DYDC1         | -0.484452988 |
| ILMN_1797594 | NFAT5          | 0.621331236 | GOTERM_BP_FAT          | <a href="#">induction of apoptosis by intracellular signals</a>         | 11    | 1.60E-01  | 8.20E-01  | ILMN_1737515 | HSP90AA1      | -0.484456996 |
| ILMN_2329378 | CLC12A         | 0.621270542 | GOTERM_BP_FAT          | <a href="#">negative regulation of survival gene product expression</a> | 3     | 2.30E-01  | 8.90E-01  | ILMN_1676289 | NCAM1         | -0.484526772 |
| ILMN_1715715 | CEBPA          | 0.621197987 | GOTERM_BP_FAT          | <a href="#">release of cytochrome c from mitochondria</a>               | 5     | 3.00E-01  | 9.30E-01  | ILMN_1735108 | ANKSF6        | -0.484632481 |
| ILMN_1781099 | ISY1           | 0.621160077 | GOTERM_BP_FAT          | <a href="#">lymphocyte apoptosis</a>                                    | 3     | 3.90E-01  | 9.70E-01  | ILMN_1676997 | TREX1         | -0.484653136 |
| ILMN_2402674 | DPM3           | 0.621115971 | BIOCARTA               | <a href="#">Role of Mitochondria in Apoptotic Signaling</a>             | 6     | 4.30E-01  | 9.70E-01  | ILMN_1753415 | LYGH          | -0.484671046 |
| ILMN_1693137 | TC15           | 0.620977594 | BIOCARTA               | <a href="#">Apoptotic Signaling in Response to DNA Damage</a>           | 6     | 4.30E-01  | 9.70E-01  | ILMN_1660261 | TDRD6         | -0.484747081 |
| ILMN_1771057 | NAB2           | 0.620968652 | GOTERM_BP_FAT          | <a href="#">regulation of survival gene product expression</a>          | 4     | 6.50E-01  | 9.90E-01  | ILMN_1654637 | SEDF5         | -0.484757961 |
| ILMN_1674626 | C9orf3         | 0.620953797 | KEGG_PATHWAY           | <a href="#">Apoptotic lateral sclerosis (ALS)</a>                       | 8     | 7.00E-01  | 8.90E-01  | ILMN_1817115 | CKO1807       | -0.485010512 |
| ILMN_1737580 | PPFD2          | 0.620775065 | Enrichment Score: 0.53 |                                                                         | Count | P_Value   | Benjamini | ILMN_1659773 | PCDHA@        | -0.485020768 |
| ILMN_2110271 | OLFML2         | 0.620749721 | SP_PIR_KEYWORDS        | <a href="#">myelination</a>                                             | 11    | 1.50E-02  | 1.30E-01  | ILMN_3235833 | NA            | -0.485034538 |
| ILMN_1741617 | SCR11          | 0.620644807 | INTERPRO               | <a href="#">ADP-ribosylation factor</a>                                 | 4     | 5.40E-01  | 1.00E+00  | ILMN_1736533 | RND2          | -0.48504642  |
| ILMN_1715161 | C22orf103      | 0.620590608 | SMART                  | <a href="#">ADP-ribosylation factor</a>                                 | 4     | 5.70E-01  | 9.90E-01  | ILMN_1787988 | UBE2D1        | -0.485069562 |
| ILMN_1712419 | CDC2C          | 0.620437464 | PIR_SUPERFAMILY        | <a href="#">PIR5F00171LAD-P-ribosylation factor</a>                     | 4     | 6.50E-01  | 1.00E+00  | ILMN_1887349 | BU37309       | -0.485105633 |
| ILMN_1698803 | ZAK            | 0.620419111 | INTERPRO               | <a href="#">ARF/SAR superfamily</a>                                     | 4     | 7.50E-01  | 1.00E+00  | ILMN_1890976 | BX10693       | -0.485121211 |
| ILMN_1697218 | MED22          | 0.620356201 | Enrichment Score: 0.53 |                                                                         | Count | P_Value   | Benjamini | ILMN_1658299 | CCR2          | -0.485137193 |
| ILMN_2391750 | SFM8T1         | 0.620244592 | GOTERM_BP_FAT          | <a href="#">epithelial to mesenchymal transition</a>                    | 7     | 2.40E-02  | 3.30E-01  | ILMN_1664016 | ARHGFB18      | -0.485320747 |
| ILMN_1672446 | RPL11          | 0.620215588 | GOTERM_BP_FAT          | <a href="#">mesenchymal cell differentiation</a>                        | 10    | 2.20E-01  | 8.90E-01  | ILMN_1722640 | LOC284801     | -0.485351539 |
| ILMN_1728802 | SODCAG8        | 0.620192568 | GOTERM_BP_FAT          | <a href="#">mesenchymal cell development</a>                            | 10    | 2.20E-01  | 8.90E-01  | ILMN_1755419 | EP1AX         | -0.485387193 |
| ILMN_1740938 | APOR           | 0.620173322 | GOTERM_BP_FAT          | <a href="#">mesenchyme development</a>                                  | 10    | 2.40E-01  | 9.00E-01  | ILMN_1804137 | ATP11C        | -0.485415747 |
| ILMN_1755749 | PKG1           | 0.620161189 | GOTERM_BP_FAT          | <a href="#">embryonal cell migration</a>                                | 7     | 3.60E-01  | 9.60E-01  | ILMN_1710326 | CLDN11        | -0.485587847 |
| ILMN_1802096 | ARTB1          | 0.619776798 | GOTERM_BP_FAT          | <a href="#">neural crest cell migration</a>                             | 3     | 8.30E-01  | 1.00E+00  | ILMN_1667804 | FAM182B       | -0.485651718 |
| ILMN_2308689 | AGBL5          | 0.619765569 | GOTERM_BP_FAT          | <a href="#">neural crest cell differentiation</a>                       | 4     | 8.30E-01  | 1.00E+00  | ILMN_1803261 | OPRM1         | -0.48571115  |
| ILMN_1716563 | PRKCB          | 0.619755632 | GOTERM_BP_FAT          | <a href="#">neural crest cell development</a>                           | 4     | 8.30E-01  | 1.00E+00  | ILMN_1679546 | IGS20L2       | -0.485805273 |
| ILMN_2073235 | FTH1           | 0.619707741 | Enrichment Score: 0.53 |                                                                         | Count | P_Value   | Benjamini | ILMN_1616256 | TCRA          | -0.485927899 |
| ILMN_1809400 | CDKN1P1        | 0.619664089 | UP_SEQ_FEATURE         | <a href="#">domain:SAND</a>                                             | 3     | 2.50E-01  | 1.00E+00  | ILMN_3206854 | TYW18         | -0.485939555 |
| ILMN_1688103 | CTNBP1         | 0.619639588 | INTERPRO               | <a href="#">SAND</a>                                                    | 3     | 2.70E-01  | 1.00E+00  | ILMN_1661853 | TRIM49L2      | -0.485946961 |
| ILMN_1797522 | DUSP3          | 0.619567878 | SMART                  | <a href="#">SAND</a>                                                    | 3     | 2.90E-01  | 9.40E-01  | ILMN_1778236 | PTPN11        | -0.485985263 |
| ILMN_1809010 | PSMC3          | 0.619544418 | INTERPRO               | <a href="#">SAND-like</a>                                               | 3     | 4.10E-01  | 1.00E+00  | ILMN_1791283 | AK126240      | -0.486021395 |
| ILMN_1811823 | MED25          | 0.619513844 | Enrichment Score: 0.52 |                                                                         | Count | P_Value   | Benjamini | ILMN_1755369 | RAB3A         | -0.486053789 |
| ILMN_1696704 | TLE4           | 0.619392467 | BIOCARTA               | <a href="#">TNF3 Signaling Pathway</a>                                  | 11    | 4.80E-02  | 8.90E-01  | ILMN_1737514 | KYNU          | -0.486098831 |
| ILMN_1662895 | NME1           | 0.619324939 | GOTERM_BP_FAT          | <a href="#">activation of pro-apoptotic gene products</a>               | 7     | 6.00E-02  | 5.50E-01  | ILMN_1769931 | SFRP          | -0.486100916 |
| ILMN_2370208 | CMTM3          | 0.619107841 | BIOCARTA               | <a href="#">Ceramide Signaling Pathway</a>                              | 7     | 2.10E-01  | 9.40E-01  | ILMN_2101526 | GGCT          | -0.486212118 |
| ILMN_1815668 | GTF2I          | 0.619037669 | GOTERM_BP_FAT          |                                                                         |       |           |           |              |               |              |







|              |          |             |
|--------------|----------|-------------|
| ILMN_3237368 | MAFG     | 0.60368571  |
| ILMN_1659727 | CDAN1    | 0.60368155  |
| ILMN_1708041 | PLEKHF1  | 0.603557258 |
| ILMN_1739558 | GREL1    | 0.60349045  |
| ILMN_1690806 | CR13L20  | 0.60345394  |
| ILMN_1811049 | POU2F1   | 0.60345057  |
| ILMN_1767337 | SFXN5    | 0.603394433 |
| ILMN_1801101 | ZBTB48   | 0.603312134 |
| ILMN_2114876 | IFPL1    | 0.603318644 |
| ILMN_1664243 | ISE1     | 0.60329064  |
| ILMN_1782788 | CSDA     | 0.603185596 |
| ILMN_1781580 | BR13     | 0.60314657  |
| ILMN_1673944 | MANBAL   | 0.603115857 |
| ILMN_2346555 | AT2PC1   | 0.60311099  |
| ILMN_1736623 | NCKP5D   | 0.602768278 |
| ILMN_1788972 | SARS     | 0.602647655 |
| ILMN_1753312 | PLXDC2   | 0.602566315 |
| ILMN_1670456 | IRBM42   | 0.602512248 |
| ILMN_2361163 | S5BP3    | 0.602453977 |
| ILMN_1812995 | CTSL1    | 0.602318078 |
| ILMN_1689886 | TMEM80   | 0.602247033 |
| ILMN_2387505 | AP1B1    | 0.602218145 |
| ILMN_1670398 | BCR      | 0.602190015 |
| ILMN_1691930 | CBX6     | 0.602051977 |
| ILMN_1790619 | MEMO1    | 0.60194508  |
| ILMN_2081269 | OR2ADP   | 0.60192587  |
| ILMN_2398903 | HAX1     | 0.60173596  |
| ILMN_1744822 | BECN1    | 0.601725771 |
| ILMN_1811682 | CLIP2    | 0.601633363 |
| ILMN_3247424 | ADAP1    | 0.601546688 |
| ILMN_1735333 | NBR1     | 0.601467656 |
| ILMN_2343281 | IALEC    | 0.601423953 |
| ILMN_1780153 | OTRT1    | 0.601366167 |
| ILMN_1688295 | ZNF219   | 0.601348002 |
| ILMN_2333167 | FIBP1A   | 0.601345885 |
| ILMN_1795183 | RNASE1   | 0.601313435 |
| ILMN_1655572 | C6orf39  | 0.601226528 |
| ILMN_1651435 | MTF1A    | 0.601129714 |
| ILMN_1657884 | NME1     | 0.601015529 |
| ILMN_2394381 | CLN3     | 0.600953166 |
| ILMN_1691290 | CLESR3   | 0.600932254 |
| ILMN_1697864 | C6orf38  | 0.600909598 |
| ILMN_1747442 | PHN1A    | 0.600846601 |
| ILMN_1707748 | PIM3     | 0.600732006 |
| ILMN_2114568 | GBP5     | 0.60068567  |
| ILMN_2054392 | PHL1     | 0.600685305 |
| ILMN_1740216 | ERCC3    | 0.600643528 |
| ILMN_1705783 | NXF1     | 0.600628355 |
| ILMN_1724194 | AFER1    | 0.60052816  |
| ILMN_1739335 | OST4     | 0.600505463 |
| ILMN_1711810 | PNKD     | 0.600532356 |
| ILMN_1774132 | MAP6     | 0.600441334 |
| ILMN_2339627 | COPE     | 0.600410738 |
| ILMN_1694950 | MRP28    | 0.600359062 |
| ILMN_1715181 | IRMS1    | 0.600343973 |
| ILMN_1762527 | CNP      | 0.600309571 |
| ILMN_1750761 | NCR1     | 0.600163747 |
| ILMN_1726659 | THOP1    | 0.60015062  |
| ILMN_1652929 | POGZ     | 0.59986472  |
| ILMN_2394250 | PLEKHA1  | 0.599834206 |
| ILMN_1751482 | FAM83C   | 0.59980756  |
| ILMN_1785831 | ZDHHC13  | 0.599781555 |
| ILMN_1778991 | NF18     | 0.599686543 |
| ILMN_1782098 | SMO      | 0.599485382 |
| ILMN_2141482 | SERPINF1 | 0.599363814 |
| ILMN_1656998 | CHMP4B   | 0.599265175 |
| ILMN_1778023 | SURF6    | 0.599230428 |
| ILMN_1706664 | RIMK1A   | 0.59918758  |
| ILMN_1753353 | SLBP     | 0.599167167 |
| ILMN_2372639 | TRAPPC5  | 0.599159135 |
| ILMN_3185709 | IPK2     | 0.59891642  |
| ILMN_2400759 | CVPL     | 0.59882385  |
| ILMN_1658639 | APC1     | 0.598776047 |
| ILMN_1718023 | APEH     | 0.59870448  |
| ILMN_1751431 | WIBG     | 0.598693554 |
| ILMN_2345353 | LTI1     | 0.59862278  |
| ILMN_2075440 | PDAD3P   | 0.598604353 |
| ILMN_2242483 | CTSC     | 0.598562706 |
| ILMN_1787718 | SLC17A1  | 0.598508898 |
| ILMN_1786310 | MVK      | 0.598455581 |
| ILMN_1724407 | TACC3    | 0.598432535 |
| ILMN_1757692 | E1F6G3   | 0.598287317 |
| ILMN_1706541 | FBLN1    | 0.59823139  |
| ILMN_1745583 | CDCA1    | 0.59818834  |
| ILMN_1784005 | RAB13    | 0.597832028 |
| ILMN_1784141 | JAKMIP1  | 0.597786862 |
| ILMN_1789196 | TPM2     | 0.597686251 |
| ILMN_1677968 | KIAA0649 | 0.597619344 |
| ILMN_1652139 | abPp4ts  | 0.59756277  |
| ILMN_2155261 | KTCL8    | 0.59737522  |
| ILMN_1690686 | CARS     | 0.597364002 |
| ILMN_2208413 | ARHGAP15 | 0.59728746  |
| ILMN_1811765 | ADAMT52  | 0.597227504 |
| ILMN_1869109 | NUCKS1   | 0.597162893 |
| ILMN_1668960 | MID1P1   | 0.597094812 |
| ILMN_1668685 | GFBR4    | 0.597056285 |
| ILMN_2097546 | NLDC     | 0.597029011 |

| Annotation Cluster     | Enrichment Score: 0.47                                                                            | Count | P_Value  | Benjamini |
|------------------------|---------------------------------------------------------------------------------------------------|-------|----------|-----------|
| Annotation Cluster 248 | domain:SEC7                                                                                       | 4     | 3.00E-01 | 1.00E+00  |
|                        | UP_SEQ_FEATURE                                                                                    | 4     | 3.00E-01 | 1.00E+00  |
|                        | INTERPRO                                                                                          | 4     | 3.00E-01 | 1.00E+00  |
|                        | SMART                                                                                             | 4     | 3.00E-01 | 1.00E+00  |
|                        | GOTERM_MF_FAT                                                                                     | 4     | 3.80E-01 | 9.80E-01  |
|                        | <a href="#">ARF guanyl-nucleotide exchange factor activity</a>                                    | 4     | 3.80E-01 | 9.80E-01  |
| Annotation Cluster 249 | Enrichment Score: 0.47                                                                            | Count | P_Value  | Benjamini |
|                        | BIOCARTA                                                                                          | 7     | 2.50E-02 | 9.70E-01  |
|                        | <a href="#">Role of ERKs in Neuronal Survival</a>                                                 | 7     | 2.50E-02 | 9.70E-01  |
|                        | BIOCARTA                                                                                          | 8     | 7.30E-02 | 9.40E-01  |
|                        | <a href="#">Ras Signaling Pathway</a>                                                             | 8     | 7.30E-02 | 9.40E-01  |
|                        | BIOCARTA                                                                                          | 6     | 3.00E-01 | 9.60E-01  |
|                        | <a href="#">Inhibition of Cellular Proliferation by Glioxen</a>                                   | 6     | 3.00E-01 | 9.60E-01  |
|                        | BIOCARTA                                                                                          | 4     | 6.00E-01 | 9.80E-01  |
|                        | <a href="#">Transcription factor CREB and its extracellular signals</a>                           | 4     | 6.00E-01 | 9.80E-01  |
|                        | BIOCARTA                                                                                          | 5     | 6.40E-01 | 9.90E-01  |
|                        | <a href="#">PTEN dependent cell cycle arrest and apoptosis</a>                                    | 5     | 6.40E-01 | 9.90E-01  |
|                        | BIOCARTA                                                                                          | 5     | 6.40E-01 | 9.90E-01  |
|                        | <a href="#">TGFbeta Factors Initiate Mucosal Healing</a>                                          | 5     | 6.40E-01 | 9.90E-01  |
|                        | BIOCARTA                                                                                          | 4     | 7.10E-01 | 1.00E+00  |
|                        | <a href="#">Multiple antiapoptotic pathways from IGF-1R signaling lead to IAD phosphorylation</a> | 4     | 7.10E-01 | 1.00E+00  |
|                        | BIOCARTA                                                                                          | 3     | 9.60E-01 | 1.00E+00  |
|                        | <a href="#">Phosphoproteins as signaling intermediaries</a>                                       | 3     | 9.60E-01 | 1.00E+00  |
|                        | BIOCARTA                                                                                          | 3     | 9.60E-01 | 1.00E+00  |
|                        | <a href="#">Influence of Ras and Rho proteins on G1 to S Transition</a>                           | 3     | 9.60E-01 | 1.00E+00  |
| Annotation Cluster 250 | Enrichment Score: 0.47                                                                            | Count | P_Value  | Benjamini |
|                        | GOTERM_MF_FAT                                                                                     | 7     | 1.40E-01 | 8.60E-01  |
|                        | UP_SEQ_FEATURE                                                                                    | 3     | 4.40E-01 | 1.00E+00  |
|                        | INTERPRO                                                                                          | 3     | 4.60E-01 | 1.00E+00  |
|                        | SMART                                                                                             | 3     | 4.80E-01 | 9.70E-01  |
|                        | GOTERM_MF_FAT                                                                                     | 7     | 2.20E-01 | 9.30E-01  |
|                        | SP_PIR_KEYWORDS                                                                                   | 5     | 2.40E-01 | 8.60E-01  |
|                        | SP_PIR_KEYWORDS                                                                                   | 11    | 4.30E-01 | 8.60E-01  |
|                        | GOTERM_MF_FAT                                                                                     | 18    | 4.40E-01 | 9.90E-01  |
|                        | GOTERM_MF_FAT                                                                                     | 7     | 4.60E-01 | 9.90E-01  |
| Annotation Cluster 251 | Enrichment Score: 0.47                                                                            | Count | P_Value  | Benjamini |
|                        | DNA-directed DNA polymerase activity                                                              | 7     | 2.20E-01 | 9.30E-01  |
|                        | dnadirectd dna polymerase                                                                         | 5     | 2.40E-01 | 8.60E-01  |
|                        | nucleotidyltransferase                                                                            | 11    | 4.30E-01 | 8.60E-01  |
|                        | nucleotidyltransferase activity                                                                   | 18    | 4.40E-01 | 9.90E-01  |
|                        | DNA polymerase activity                                                                           | 7     | 4.60E-01 | 9.90E-01  |
| Annotation Cluster 252 | Enrichment Score: 0.46                                                                            | Count | P_Value  | Benjamini |
|                        | SP_PIR_KEYWORDS                                                                                   | 41    | 2.20E-02 | 1.70E-01  |
|                        | GOTERM_CC_FAT                                                                                     | 43    | 5.70E-01 | 9.40E-01  |
|                        | GOTERM_CC_FAT                                                                                     | 16    | 6.10E-01 | 9.50E-01  |
|                        | GOTERM_CC_FAT                                                                                     | 45    | 6.50E-01 | 9.60E-01  |
|                        | GOTERM_CC_FAT                                                                                     | 108   | 1.60E-00 | 1.00E+00  |
| Annotation Cluster 253 | Enrichment Score: 0.46                                                                            | Count | P_Value  | Benjamini |
|                        | domain:ABC transporter 2                                                                          | 8     | 8.40E-02 | 1.00E+00  |
|                        | UP_SEQ_FEATURE                                                                                    | 8     | 8.40E-02 | 1.00E+00  |
|                        | UP_SEQ_FEATURE                                                                                    | 7     | 2.40E-01 | 1.00E+00  |
|                        | UP_SEQ_FEATURE                                                                                    | 7     | 2.40E-01 | 1.00E+00  |
|                        | UP_SEQ_FEATURE                                                                                    | 7     | 2.40E-01 | 1.00E+00  |
|                        | INTERPRO                                                                                          | 9     | 3.50E-01 | 1.00E+00  |
|                        | PIR_SUPERFAMILY                                                                                   | 21    | 3.60E-01 | 1.00E+00  |
|                        | INTERPRO                                                                                          | 9     | 4.30E-01 | 1.00E+00  |
|                        | SMART                                                                                             | 21    | 4.40E-01 | 9.70E-01  |
|                        | ABC transporter, integral membrane type-1                                                         | 3     | 5.60E-01 | 1.00E+00  |
|                        | UP_SEQ_FEATURE                                                                                    | 3     | 5.60E-01 | 1.00E+00  |
|                        | UP_SEQ_FEATURE                                                                                    | 3     | 5.60E-01 | 1.00E+00  |
|                        | UP_SEQ_FEATURE                                                                                    | 4     | 6.00E-01 | 1.00E+00  |
|                        | INTERPRO                                                                                          | 3     | 6.90E-01 | 9.80E-01  |
|                        | COG_ONTOLOGY                                                                                      | 6     | 8.10E-01 | 9.40E-01  |
|                        | KEGG_PATHWAY                                                                                      | 6     | 8.10E-01 | 9.40E-01  |
| Annotation Cluster 254 | Enrichment Score: 0.46                                                                            | Count | P_Value  | Benjamini |
|                        | cell fate specification                                                                           | 11    | 1.30E-01 | 7.50E-01  |
|                        | GOTERM_BP_FAT                                                                                     | 4     | 4.70E-01 | 9.80E-01  |
|                        | GOTERM_BP_FAT                                                                                     | 4     | 4.70E-01 | 9.80E-01  |
|                        | GOTERM_BP_FAT                                                                                     | 3     | 5.30E-01 | 9.90E-01  |
| Annotation Cluster 255 | Enrichment Score: 0.46                                                                            | Count | P_Value  | Benjamini |
|                        | regulation of interleukin-10 production                                                           | 3     | 4.40E-01 | 9.80E-01  |
|                        | GOTERM_BP_FAT                                                                                     | 3     | 4.40E-01 | 9.80E-01  |
|                        | GOTERM_BP_FAT                                                                                     | 5     | 5.70E-01 | 9.90E-01  |
| Annotation Cluster 256 | Enrichment Score: 0.46                                                                            | Count | P_Value  | Benjamini |
|                        | UP_SEQ_FEATURE                                                                                    | 3     | 3.00E-01 | 1.00E+00  |
|                        | INTERPRO                                                                                          | 3     | 3.70E-01 | 1.00E+00  |
|                        | SMART                                                                                             | 3     | 3.90E-01 | 9.70E-01  |
| Annotation Cluster 257 | Enrichment Score: 0.46                                                                            | Count | P_Value  | Benjamini |
|                        | pentose-phosphate shunt                                                                           | 4     | 1.00E-01 | 7.00E-01  |
|                        | GOTERM_BP_FAT                                                                                     | 10    | 2.40E-01 | 9.00E-01  |
|                        | GOTERM_BP_FAT                                                                                     | 8     | 2.70E-01 | 9.20E-01  |
|                        | GOTERM_BP_FAT                                                                                     | 8     | 2.70E-01 | 9.20E-01  |
|                        | GOTERM_BP_FAT                                                                                     | 8     | 2.90E-01 | 9.30E-01  |
|                        | GOTERM_BP_FAT                                                                                     | 8     | 3.10E-01 | 9.40E-01  |
|                        | GOTERM_BP_FAT                                                                                     | 29    | 3.40E-01 | 9.50E-01  |
|                        | GOTERM_BP_FAT                                                                                     | 4     | 3.50E-01 | 9.60E-01  |
|                        | GOTERM_BP_FAT                                                                                     | 9     | 4.60E-01 | 9.80E-01  |
|                        | GOTERM_BP_FAT                                                                                     | 20    | 6.50E-01 | 1.00E+00  |
|                        | GOTERM_BP_FAT                                                                                     | 4     | 6.60E-01 | 1.00E+00  |
|                        | GOTERM_BP_FAT                                                                                     | 9     | 8.30E-01 | 1.00E+00  |
| Annotation Cluster 258 | Enrichment Score: 0.45                                                                            | Count | P_Value  | Benjamini |
|                        | cell cycle checkpoint                                                                             | 16    | 2.10E-01 | 8.80E-01  |
|                        | GOTERM_BP_FAT                                                                                     | 14    | 2.50E-01 | 9.10E-01  |
|                        | GOTERM_BP_FAT                                                                                     | 9     | 3.00E-01 | 9.30E-01  |
|                        | GOTERM_BP_FAT                                                                                     | 9     | 3.00E-01 | 9.30E-01  |
|                        | GOTERM_BP_FAT                                                                                     | 3     | 5.30E-01 | 9.90E-01  |
|                        | GOTERM_BP_FAT                                                                                     | 3     | 6.10E-01 | 1.00E+00  |
| Annotation Cluster 259 | Enrichment Score: 0.45                                                                            | Count | P_Value  | Benjamini |
|                        | calmodulin-binding                                                                                | 19    | 1.90E-01 | 6.30E-01  |
|                        | GOTERM_MF_FAT                                                                                     | 21    | 3.68E-01 | 9.70E-01  |
|                        | UP_SEQ_FEATURE                                                                                    | 7     | 6.70E-01 | 1.00E+00  |
| Annotation Cluster 260 | Enrichment Score: 0.45                                                                            | Count | P_Value  | Benjamini |
|                        | endothelial cell development                                                                      | 3     | 2.30E-01 | 8.90E-01  |
|                        | GOTERM_BP_FAT                                                                                     | 4     | 3.50E-01 | 9.60E-01  |
|                        | GOTERM_BP_FAT                                                                                     | 4     | 5.40E-01 | 9.90E-01  |
| Annotation Cluster 261 | Enrichment Score: 0.45                                                                            | Count | P_Value  | Benjamini |
|                        | ceramide metabolic process                                                                        | 9     | 1.80E-01 | 8.40E-01  |
|                        | GOTERM_BP_FAT                                                                                     | 7     | 2.20E-01 | 8.80E-01  |
|                        | GOTERM_BP_FAT                                                                                     | 9     | 2.40E-01 | 8.90E-01  |
|                        | GOTERM_BP_FAT                                                                                     | 6     | 2.50E-01 | 9.10E-01  |
|                        | GOTERM_BP_FAT                                                                                     | 14    | 2.70E-01 | 9.20E-01  |
|                        | GOTERM_BP_FAT                                                                                     | 13    | 2.80E-01 | 9.20E-01  |
|                        | GOTERM_BP_FAT                                                                                     | 6     | 3.90E-01 | 9.70E-01  |

|               |          |              |
|---------------|----------|--------------|
| ILMN_1678968  | GEM      | -0.49583411  |
| ILMN_2128489  | UQC8B    | -0.495862925 |
| ILMN_1779951  | ANKRD7   | -0.495895963 |
| ILMN_1801143  | LOVDH1   | -0.495905648 |
| ILMN_1792931  | LVSMD1   | -0.496070999 |
| ILMN_1882560  | NA       | -0.496119898 |
| ILMN_1652439  | KRTAP3-1 | -0.496200121 |
| ILMN_1777657  | SLC22A9  | -0.496237243 |
| ILMN_1811096  | FXR1     | -0.496299776 |
| ILMN_2351352  | MAP4BP2  | -0.496299966 |
| ILMN_3305273  | PSA1     | -0.496465607 |
| ILMN_3309664  | MIR300   | -0.496497568 |
| ILMN_1775646  | L3MBTL4  | -0.496570073 |
| ILMN_1306655  | ARHGAP6  | -0.496658217 |
| ILMN_1767649  | PCDHGC3  | -0.496692056 |
| ILMN_1768205  | SLEFN12L | -0.496734832 |
| ILMN_2275060  | GHRHR    | -0.496769983 |
| ILMN_1771888  | NBP3F    | -0.49683929  |
| ILMN_1654063  | HYDIN    | -0.496866963 |
| ILMN_1874172  | KOBT939  | -0.496884903 |
| ILMN_3306208  | BM932296 | -0.497038992 |
| ILMN_1651752  | Cxor2f1  | -0.497043976 |
| ILMN_1779997  | MEI53    | -0.497058848 |
| ILMN_1712461  | CBLN1    | -0.497083712 |
| ILMN_1669015  | XPPEP1   | -0.497095622 |
| ILMN_11730117 | TAC1C5   | -0.497099952 |
| ILMN_1802146  | ZNF74    | -0.497124265 |
| ILMN_2200331  | H2AFX    | -0.497161211 |
| ILMN_1810115  | KCTD2    | -0.497168956 |
| ILMN_1701881  | ZNF365   | -0.497180095 |
| ILMN_1793231  | BF056888 | -0.497267285 |
| ILMN_1669194  | TMEM88B  | -0.497297967 |
| ILMN_1769752  | FER1L5   | -0.49731926  |
| ILMN_1847029  | CX78763  | -0.497337425 |
| ILMN_3307818  | C9orf106 | -0.497353678 |
| ILMN_3240524  | MFSD6    | -0.497381559 |
| ILMN_1789500  | KMA1875  | -0.497394456 |
| ILMN_1750529  | MTORC1   | -0.49744893  |
| ILMN_1815051  | AP15     | -0.497524899 |
| ILMN_1652023  | AGFG2    | -0.49752636  |
| ILMN_1769647  | CHIA     | -0.497549809 |
| ILMN_1766320  | IL3      | -0.497600278 |
| ILMN_1796595  | CS2H72   | -0.497626242 |
| ILMN_1671880  | MYO4ML2  | -0.497632715 |
| ILMN_2292863  | RASA1    | -0.497691613 |
| ILMN_1837935  | TNPO1    | -0.497698456 |
| ILMN_1799259  | RASSF2   | -0.497736154 |
|               |          |              |

|              |          |             |                               |                                                                                             |     |          |          |              |              |              |
|--------------|----------|-------------|-------------------------------|---------------------------------------------------------------------------------------------|-----|----------|----------|--------------|--------------|--------------|
| ILMN_3182762 | RPL21    | 0.596797538 | GOTERM_BP_FAT                 | <a href="#">sphingomyelin metabolic process</a>                                             | 3   | 4.40E-01 | 9.80E-01 | ILMN_1740305 | DLEC1        | -0.500020439 |
| ILMN_1658231 | NACC1    | 0.596748414 | GOTERM_BP_FAT                 | <a href="#">membrane lipid biosynthetic process</a>                                         | 6   | 4.70E-01 | 9.80E-01 | ILMN_1731326 | PRR23C       | -0.500174805 |
| ILMN_1703263 | SP140    | 0.596763889 | GOTERM_BP_FAT                 | <a href="#">ceramide biosynthetic process</a>                                               | 3   | 6.10E-01 | 1.00E+00 | ILMN_2390318 | CIDEA        | -0.500190252 |
| ILMN_1720953 | ZFAND3   | 0.59671506  | GOTERM_BP_FAT                 | <a href="#">sphingolipid biosynthetic process</a>                                           | 3   | 6.40E-01 | 1.00E+00 | ILMN_1653937 | UPP2         | -0.50026267  |
| ILMN_1698491 | MMD3     | 0.596636286 | KEGG_PATHWAY                  | <a href="#">Sphingolipid metabolism</a>                                                     | 6   | 7.20E-01 | 9.00E-01 | ILMN_1709112 | CHM          | -0.500334664 |
| ILMN_1664464 | PTGDS    | 0.596546765 | <b>Annotation Cluster 264</b> | <b>Enrichment Score: 0.45</b>                                                               |     |          |          | ILMN_1656939 | LOC40099     | -0.50050912  |
| ILMN_1653861 | SCMH1    | 0.596542778 | GOTERM_CC_FAT                 | <a href="#">ribonucleo-protein complex</a>                                                  | 7   | 1.80E-01 | 6.50E-01 | ILMN_1793433 | RAB10        | -0.500374101 |
| ILMN_2384113 | DFBF     | 0.596467807 | GOTERM_MF_FAT                 | <a href="#">RNA polymerase II transcription mediator activity</a>                           | 6   | 3.10E-01 | 9.70E-01 | ILMN_3235340 | ACER2        | -0.500429574 |
| ILMN_1785618 | SMTN     | 0.596417042 | GOTERM_BP_FAT                 | <a href="#">general RNA polymerase II transcription factor activity</a>                     | 6   | 7.90E-01 | 1.00E+00 | ILMN_1725910 | CNTRF        | -0.500400777 |
| ILMN_1733932 | SNURF    | 0.59638252  | <b>Annotation Cluster 263</b> | <b>Enrichment Score: 0.44</b>                                                               |     |          |          | ILMN_2389960 | ILA          | -0.500476975 |
| ILMN_2211122 | TRAPP2C  | 0.596268973 | BIOCARTA                      | <a href="#">Synaptic Proteins at the Synaptic Junction</a>                                  | 7   | 1.20E-01 | 9.00E-01 | ILMN_1707965 | LOC100192378 | -0.500476814 |
| ILMN_1724341 | ALG13    | 0.596268318 | UP_SEQ_FEATURE                | domain:Guanylate kinase-like                                                                | 5   | 3.00E-01 | 1.00E+00 | ILMN_1728803 | HMP19        | -0.500600508 |
| ILMN_1659240 | MTMR14   | 0.596196159 | INTERPRO                      | <a href="#">Guanylate kinase</a>                                                            | 5   | 3.30E-01 | 1.00E+00 | ILMN_1744102 | AKI28005     | -0.50076465  |
| ILMN_3238803 | RASL3    | 0.596116657 | INTERPRO                      | <a href="#">Guanylate kinase/L-type calcium channel region</a>                              | 5   | 4.20E-01 | 1.00E+00 | ILMN_1750092 | SEPFCS       | -0.500796234 |
| ILMN_2229922 | C2Jorf55 | 0.595954254 | UP_SEQ_FEATURE                | domain:PDZ 3                                                                                | 5   | 4.40E-01 | 1.00E+00 | ILMN_2249677 | LSR          | -0.500794866 |
| ILMN_1675106 | WIP2     | 0.595753486 | SMART                         | <a href="#">Gukc</a>                                                                        | 5   | 4.50E-01 | 9.70E-01 | ILMN_2388285 | CX18         | -0.500815179 |
| ILMN_1691436 | BLVRA    | 0.595665716 | UP_SEQ_FEATURE                | domain:PDZ 1                                                                                | 6   | 5.40E-01 | 1.00E+00 | ILMN_1757807 | AGXT2L1      | -0.500946964 |
| ILMN_2392635 | ABC1     | 0.595633076 | UP_SEQ_FEATURE                | domain:PDZ 2                                                                                | 6   | 5.40E-01 | 1.00E+00 | ILMN_1910948 | AKO91312     | -0.500962313 |
| ILMN_1659769 | MRAP     | 0.595605399 | <b>Annotation Cluster 264</b> | <b>Enrichment Score: 0.44</b>                                                               |     |          |          | ILMN_1716524 | RAB7A        | -0.500969516 |
| ILMN_1732921 | ITGB8    | 0.595455735 | BIOCARTA                      | <a href="#">Role of Erk5 in Neuronal Survival</a>                                           | 7   | 2.50E-02 | 9.70E-01 | ILMN_1677311 | AV665104     | -0.501079047 |
| ILMN_1655195 | SMAD4    | 0.595214509 | BIOCARTA                      | <a href="#">The IGF-1 Receptor and Longevity</a>                                            | 5   | 1.50E-01 | 9.30E-01 | ILMN_1904256 | CR33608      | -0.501175829 |
| ILMN_1794912 | ATP5B    | 0.595189682 | BIOCARTA                      | <a href="#">IL-2 Receptor Beta Chain in T Cell Activation</a>                               | 10  | 1.70E-01 | 9.30E-01 | ILMN_1862687 | DA19703      | -0.50120668  |
| ILMN_1669966 | NDU5F7   | 0.595163172 | BIOCARTA                      | <a href="#">Regulation of BAD phosphorylation</a>                                           | 6   | 2.60E-01 | 9.40E-01 | ILMN_1703092 | RECQ4        | -0.501289048 |
| ILMN_1750321 | TRANK1   | 0.595124349 | BIOCARTA                      | <a href="#">Inhibition of Cellular Proliferation by Glioxen</a>                             | 6   | 3.00E-01 | 9.60E-01 | ILMN_1658675 | CDH23        | -0.501301003 |
|              |          |             |                               | <a href="#">Control of skeletal myogenesis by HDAC 8</a>                                    |     |          |          |              |              |              |
|              |          |             |                               | <a href="#">calcium/calmodulin-dependent kinase (CaMK)</a>                                  |     |          |          | ILMN_3237044 | SNORD368     | -0.501308836 |
| ILMN_1697417 | CEP170   | 0.595078471 | BIOCARTA                      | <a href="#">Growth Hormone Signaling Pathway</a>                                            | 4   | 4.89E-01 | 9.70E-01 | ILMN_1681178 | DMBT1        | -0.501355145 |
| ILMN_1776119 | ABC1021  | 0.59508996  | BIOCARTA                      | <a href="#">Human Cytochrome b5 and Map Kinase Pathways</a>                                 | 4   | 5.30E-01 | 9.80E-01 | ILMN_2362293 | FBOX38       | -0.501368591 |
| ILMN_1755710 | EFNA4    | 0.594975865 | BIOCARTA                      | <a href="#">TGFbeta Factors Initiate Mucosal Healing</a>                                    | 5   | 6.40E-01 | 9.90E-01 | ILMN_1720838 | DEC1         | -0.501409463 |
| ILMN_2399190 | TNFSF13  | 0.594930027 | BIOCARTA                      | <a href="#">mTOR signaling pathway</a>                                                      | 7   | 8.10E-01 | 9.30E-01 | ILMN_1751636 | ANKK3        | -0.501414166 |
| ILMN_1654893 | SCAMP2   | 0.594883003 | KEGG_PATHWAY                  | <a href="#">Phospholipids as signalling intermediaries</a>                                  | 4   | 8.50E-01 | 1.00E+00 |              |              |              |
| ILMN_1769671 | RVK      | 0.594821577 | BIOCARTA                      | <a href="#">NF-kappaB and hyper trophy of the heart (Transcription in the broken heart)</a> | 5   | 9.50E-01 | 1.00E+00 | ILMN_1733736 | DNFZ4340171  | -0.501418873 |
| ILMN_1783843 | MHP      | 0.594771603 | BIOCARTA                      | <a href="#">Melanoma</a>                                                                    | 7   | 9.70E-01 | 9.90E-01 | ILMN_2361382 | TMEM421      | -0.501427898 |
| ILMN_1725612 | NUP50    | 0.594726005 | <b>Annotation Cluster 265</b> | <b>Enrichment Score: 0.44</b>                                                               |     |          |          | ILMN_1722753 | GIA5         | -0.501446578 |
| ILMN_2359456 | ERGC3    | 0.594530774 | UP_SEQ_FEATURE                | zinc finger region:RanBP2-type                                                              | 4   | 3.40E-01 | 1.00E+00 | ILMN_3301607 | C13orf18     | -0.50145178  |
| ILMN_1656310 | IDO1     | 0.594441505 | INTERPRO                      | <a href="#">zinc finger, RanBP2-type</a>                                                    | 5   | 3.60E-01 | 1.00E+00 | ILMN_1763808 | CCBL2        | -0.501464134 |
| ILMN_1657983 | TERF2IP  | 0.594340348 | SMART                         | <a href="#">TnfR-RelB</a>                                                                   | 5   | 3.90E-01 | 9.60E-01 | ILMN_1809156 | CNTRF        | -0.501481918 |
| ILMN_3226487 | EBP1     | 0.594381302 | <b>Annotation Cluster 266</b> | <b>Enrichment Score: 0.44</b>                                                               |     |          |          | ILMN_2178116 | MMF20        | -0.501491544 |
| ILMN_1693762 | LRRC48   | 0.594349265 | UP_SEQ_FEATURE                | active site:palmitoyl cysteine intermediate                                                 | 3   | 3.00E-01 | 1.00E+00 | ILMN_1733675 | MPP1         | -0.501546967 |
| ILMN_1808707 | FSCN1    | 0.594316489 | UP_SEQ_FEATURE                | zinc finger region:DHHC-type                                                                | 5   | 3.90E-01 | 1.00E+00 | ILMN_3238854 | RGPD8        | -0.50156417  |
| ILMN_1720373 | SCLT5A   | 0.594297279 | INTERPRO                      | <a href="#">Zinc finger, DHHC-type</a>                                                      | 5   | 4.20E-01 | 1.00E+00 | ILMN_1811178 | SCAPER       | -0.50162557  |
| ILMN_1748651 | PSMB3    | 0.594245679 | <b>Annotation Cluster 267</b> | <b>Enrichment Score: 0.44</b>                                                               |     |          |          | ILMN_1677734 | WFDCC9       | -0.501635867 |
| ILMN_1738263 | PIGU     | 0.593881209 | INTERPRO                      | <a href="#">S100/CaBP-9k-type, calcium binding, subdomain</a>                               | 6   | 2.50E-01 | 1.00E+00 | ILMN_2167947 | FR           | -0.501706067 |
| ILMN_3236373 | PKOXC    | 0.593834248 | PIR_SUPERFAMILY               | <a href="#">PIRSF002353:5-100 protein</a>                                                   | 5   | 2.50E-01 | 1.00E+00 | ILMN_2126205 | ASB5         | -0.50179096  |
| ILMN_1675848 | MYL12A   | 0.593763397 | INTERPRO                      | <a href="#">S100/CaBP-9k-type, calcium binding</a>                                          | 6   | 2.70E-01 | 1.00E+00 | ILMN_1720998 | CA12         | -0.501938692 |
| ILMN_1681798 | sept-06  | 0.593757192 | SP_PIR_KEYWORDS               | <a href="#">EF hand</a>                                                                     | 10  | 2.90E-01 | 7.50E-01 | ILMN_1800253 | ZNF711       | -0.502077217 |
| ILMN_3247679 | SNORA52  | 0.593637355 | UP_SEQ_FEATURE                | calcium-binding region:1; low affinity                                                      | 3   | 6.60E-01 | 1.00E+00 | ILMN_2372316 | PKD1L2       | -0.502252429 |
| ILMN_3274666 | CR601848 | 0.593615661 | UP_SEQ_FEATURE                | calcium-binding region:2; high affinity                                                     | 3   | 7.40E-01 | 1.00E+00 | ILMN_1651966 | FKBP3        | -0.502280151 |
| ILMN_1703228 | AGFG2    | 0.593588092 | <b>Annotation Cluster 268</b> | <b>Enrichment Score: 0.43</b>                                                               |     |          |          | ILMN_2187830 | CCHN         | -0.502367249 |
| ILMN_2094178 | TPST1    | 0.59357182  | BIOCARTA                      | <a href="#">Roles of 7-arrestin-dependent Recruitment of Src Kinases in GPCR Signaling</a>  | 6   | 2.60E-01 | 9.40E-01 | ILMN_1780894 | ANTXR1       | -0.502368544 |
| ILMN_1660817 | DOB2     | 0.593493035 | BIOCARTA                      | <a href="#">Role of 7-arrestins in the activation and targeting of MAP2 kinases</a>         | 5   | 2.80E-01 | 9.50E-01 | ILMN_1767503 | GABRB3       | -0.502384548 |
| ILMN_1782352 | VENTX    | 0.593444383 | BIOCARTA                      | <a href="#">7-arrestins in GPCR Desensitization</a>                                         | 3   | 7.10E-01 | 1.00E+00 | ILMN_1793167 | LOC729966    | -0.502403667 |
| ILMN_1900123 | IKZF5B59 | 0.593336623 | <b>Annotation Cluster 269</b> | <b>Enrichment Score: 0.43</b>                                                               |     |          |          | ILMN_1704334 | NA           | -0.502465852 |
| ILMN_2202739 | TMO23    | 0.593337565 | GOTERM_MF_FAT                 | <a href="#">CARD domain binding</a>                                                         | 4   | 5.00E-02 | 6.10E-01 | ILMN_1737152 | DAO          | -0.502471485 |
| ILMN_2328433 | NOP2     | 0.593329782 | UP_SEQ_FEATURE                | domain:CARD                                                                                 | 4   | 7.00E-01 | 1.00E+00 | ILMN_1796240 | TRAPP8C      | -0.502484582 |
| ILMN_1707503 | C1orf144 | 0.593307181 | INTERPRO                      | <a href="#">Casinase Recruitment</a>                                                        | 4   | 7.30E-01 | 1.00E+00 | ILMN_1788005 | PLEC         | -0.502554764 |
| ILMN_1733603 | NDUFC1   | 0.593216444 | SMART                         | <a href="#">CARD</a>                                                                        | 4   | 7.60E-01 | 1.00E+00 | ILMN_1681367 | ZNF642       | -0.502606215 |
| ILMN_1676256 | TPSAB1   | 0.593164649 | <b>Annotation Cluster 270</b> | <b>Enrichment Score: 0.43</b>                                                               |     |          |          | ILMN_1731644 | SETDB2       | -0.502618714 |
| ILMN_1725241 | CEST1    | 0.593043552 | UP_SEQ_FEATURE                | <a href="#">zymogen</a>                                                                     | 35  | 3.50E-02 | 2.30E-01 | ILMN_1849206 | DA24733      | -0.50262743  |
| ILMN_1746578 | SIC23A2  | 0.592968599 | SP_PIR_KEYWORDS               | <a href="#">proteolysis</a>                                                                 | 144 | 3.70E-01 | 9.60E-01 | ILMN_1808715 | LOC389300    | -0.502884306 |
| ILMN_1739345 | C11orf48 | 0.592918181 | GOTERM_BP_FAT                 | <a href="#">Protease</a>                                                                    | 60  | 4.80E-01 | 8.80E-01 | ILMN_2153029 | CG85         | -0.502896108 |
| ILMN_1813491 | SPTLC1   | 0.592915828 | GOTERM_MF_FAT                 | <a href="#">endopeptidase activity</a>                                                      | 50  | 4.80E-01 | 9.90E-01 | ILMN_1687589 | CTP1A        | -0.502979028 |
| ILMN_2109536 | GOLGA8F  | 0.592861775 | GOTERM_MF_FAT                 | <a href="#">serine-type peptidase activity</a>                                              | 24  | 5.20E-01 | 9.90E-01 | ILMN_1678493 | CHN1         | -0.502990482 |
| ILMN_1789733 | GLIP3    | 0.592800721 | GOTERM_MF_FAT                 | <a href="#">serine hydrolyase activity</a>                                                  | 24  | 5.50E-01 | 1.00E+00 | ILMN_1794890 | SLC38A4      | -0.503004028 |
| ILMN_1711023 | CNSRBP1  | 0.592663156 | GOTERM_MF_FAT                 | <a href="#">peptidase activity, acting on L-amino acid peptides</a>                         | 69  | 6.50E-01 | 1.00E+00 | ILMN_1743311 | TOX4         | -0.503004080 |
| ILMN_1771815 | C2orf43  | 0.592601965 | GOTERM_MF_FAT                 | <a href="#">peptidase activity</a>                                                          | 72  | 6.60E-01 | 1.00E+00 | ILMN_1704354 | NCDN         | -0.503166276 |
| ILMN_1778319 | DMKN     | 0.592557893 | <b>Annotation Cluster 271</b> | <b>Enrichment Score: 0.43</b>                                                               |     |          |          | ILMN_1865078 | ILB32552     | -0.503187368 |
| ILMN_1753805 | PRKD2    | 0.592528237 | GOTERM_BP_FAT                 | <a href="#">endochondral bone morphogenesis</a>                                             | 5   | 1.50E-01 | 7.90E-01 | ILMN_3292840 | NA           | -0.503234567 |
| ILMN_2330806 | MYO18A   | 0.592502312 | GOTERM_BP_FAT                 | <a href="#">bone morphogenesis</a>                                                          | 5   | 2.70E-01 | 9.20E-01 | ILMN_1849134 | BDOL12728    | -0.503244928 |
| ILMN_1678966 | SNRPF    | 0.592392402 | GOTERM_BP_FAT                 | <a href="#">regulation of chondrocyte differentiation</a>                                   | 2   | 8.80E-01 | 9.20E-01 | ILMN_1799303 | OPK1         | -0.503260618 |
| ILMN_1681103 | ADP1     | 0.592354006 | GOTERM_BP_FAT                 | <a href="#">endochondral ossification</a>                                                   | 3   | 4.80E-01 | 9.90E-01 | ILMN_1799985 | C13orf40     | -0.50328404  |
| ILMN_1810680 | BOLA2B   | 0.592345175 | GOTERM_BP_FAT                 | <a href="#">cartilage development</a>                                                       | 10  | 6.50E-01 | 1.00E+00 | ILMN_1778617 | TA9F         | -0.503302636 |
| ILMN_1700081 | FST      | 0.592324328 | GOTERM_BP_FAT                 | <a href="#">bone development</a>                                                            | 15  | 7.60E-01 | 1.00E+00 | ILMN_1684114 | LOC286016    | -0.50334899  |
| ILMN_3247064 | SNRNP40  | 0.592299215 | <b>Annotation Cluster 272</b> | <b>Enrichment Score: 0.43</b>                                                               |     |          |          | ILMN_3250879 | ANGPT2       | -0.503421517 |
| ILMN_1659610 | TPP3     | 0.591983311 | PIR_SUPERFAMILY               | <a href="#">PIRSF00583:heat shock protein, HSP90/HTPG types</a>                             | 3   | 2.40E-01 | 9.50E-01 | ILMN_1771019 | MTM6A        | -0.503459974 |
| ILMN_181402  | MEPE     | 0.591883276 | INTERPRO                      | <a href="#">ATP-binding region, ATPase-like</a>                                             | 6   | 3.30E-01 | 1.00E+00 | ILMN_1732127 | RHS          | -0.503542201 |
| ILMN_1802338 | HLHA3    | 0.591831182 | SMART                         | <a href="#">HATPass_c</a>                                                                   | 6   | 3.60E-01 | 9.60E-01 | ILMN_1715476 | CKMT1B       | -0.503558061 |
| ILMN_1815366 | ENGASE   | 0.591751019 | INTERPRO                      | <a href="#">Heat shock protein Hsp90</a>                                                    | 3   | 4.60E-01 | 1.00E+00 | ILMN_1717689 | BF355127     | -0.503581393 |
| ILMN_1678766 | DYNN1    | 0.591737109 | SP_PIR_KEYWORDS               | <a href="#">stress response</a>                                                             | 9   | 5.50E-01 | 9.20E-01 | ILMN_1695378 | SREBF1       | -0.503588982 |
| ILMN_2339266 | LAMA2    | 0.591735944 | <b>Annotation Cluster 273</b> | <b>Enrichment Score: 0.43</b>                                                               |     |          |          | ILMN_3236815 | SNORD116-13  | -0.503604646 |
| ILMN_2366391 | PRDX1    | 0.591712015 | GOTERM_BP_FAT                 | <a href="#">negative regulation of protein kinase cascade</a>                               | 7   | 3.40E-01 | 9.70E-01 | ILMN_1726327 | MYN1A        | -0.503719381 |
| ILMN_3179371 | HNRNKA   | 0.591661785 | GOTERM_BP_FAT                 | <a href="#">negative regulation of JNK cascade</a>                                          | 3   | 3.90E-01 | 9.70E-01 |              |              |              |

|                        |                        |                                     |       |          |           |              |               |              |  |  |  |
|------------------------|------------------------|-------------------------------------|-------|----------|-----------|--------------|---------------|--------------|--|--|--|
| ILMN_1753345           | SCAMP5                 | 0.590758952                         |       |          |           | ILMN_3283869 | FRG18         | -0.504418056 |  |  |  |
| ILMN_1741674           | PPP1R9A                | 0.590629022                         |       |          |           | ILMN_1689380 | FBXO4         | -0.504626222 |  |  |  |
| ILMN_1652445           | KAC1                   | 0.590518176                         |       |          |           | ILMN_1749822 | TS61          | -0.504471861 |  |  |  |
| ILMN_1719395           | MAR1                   | 0.590351914                         |       |          |           | ILMN_1774617 | MAR1          | -0.504599169 |  |  |  |
| ILMN_2304272           | TTCL4                  | 0.590257967                         |       |          |           | ILMN_2071405 | FBX13         | -0.504582384 |  |  |  |
| ILMN_1751028           | SERPINH1               | 0.590117785                         |       |          |           | ILMN_2272746 | SDCBP2        | -0.50468522  |  |  |  |
| ILMN_1703564           | DYH481                 | 0.590117538                         |       |          |           | ILMN_2155816 | DIRA52        | -0.504725846 |  |  |  |
| ILMN_1669286           | YWHAZ                  | 0.59004677                          |       |          |           | ILMN_1692790 | ITGB3BP       | -0.504731483 |  |  |  |
| ILMN_1806408           | ACADVL                 | 0.590043161                         |       |          |           | ILMN_1891311 | AA744242      | -0.504731716 |  |  |  |
| ILMN_2395644           | TMEM4214               | 0.590043971                         |       |          |           | ILMN_1794932 | TMEM49        | -0.50470052  |  |  |  |
| ILMN_1757577           | TM6SF2                 | 0.590019788                         |       |          |           | ILMN_1678312 | DG577523      | -0.50470052  |  |  |  |
| ILMN_1805796           | FLYWCH2                | 0.589967161                         |       |          |           | ILMN_1839750 | NA            | -0.504847741 |  |  |  |
| ILMN_2355549           | GSTT2B                 | 0.589948059                         |       |          |           | ILMN_3241149 | TMEM236       | -0.504931745 |  |  |  |
| ILMN_1794726           | RNF167                 | 0.589934921                         |       |          |           | ILMN_1665647 | CD180         | -0.504976282 |  |  |  |
| ILMN_2326121           | LCC4H114               | 0.5898961                           |       |          |           | ILMN_2052903 | CDorf141      | -0.505017183 |  |  |  |
| ILMN_2221808           | KIAA1647               | 0.589872258                         |       |          |           | ILMN_1750246 | ZBTB1         | -0.505081211 |  |  |  |
| ILMN_1679178           | ATP5D                  | 0.589758801                         |       |          |           | ILMN_1717168 | PCDHGC3       | -0.505165696 |  |  |  |
| ILMN_1682099           | TNFRIBL3               | 0.589710944                         |       |          |           | ILMN_2338849 | BIRC7         | -0.505173292 |  |  |  |
| ILMN_2379718           | RAB24                  | 0.589480592                         |       |          |           | ILMN_1651495 | BGG20193      | -0.505197916 |  |  |  |
| ILMN_1739618           | ZNF408                 | 0.589416408                         |       |          |           | ILMN_1758093 | C14orf101     | -0.505256042 |  |  |  |
| ILMN_1690834           | SOD3                   | 0.589393070                         |       |          |           | ILMN_1666711 | LOC548893     | -0.505252078 |  |  |  |
| ILMN_1752285           | RPL4                   | 0.589352595                         |       |          |           | ILMN_1837692 | BFS14654      | -0.505393678 |  |  |  |
| ILMN_2352574           | ZNF274                 | 0.589152035                         |       |          |           | ILMN_1691339 | CLEC1A        | -0.50541832  |  |  |  |
| ILMN_1793672           | SIX5                   | 0.588962627                         |       |          |           | ILMN_1788122 | GSTAS         | -0.505440943 |  |  |  |
| ILMN_1795400           | TBCD                   | 0.58875539                          |       |          |           | ILMN_3239925 | LOC25845      | -0.505470946 |  |  |  |
| ILMN_1796712           | S100A10                | 0.588572803                         |       |          |           | ILMN_2192316 | TOP1          | -0.505474113 |  |  |  |
| ILMN_1754579           | TNRC2                  | 0.588513868                         |       |          |           | ILMN_1675733 | HEPCE3        | -0.50544985  |  |  |  |
| ILMN_1790317           | DGKQ                   | 0.588422207                         |       |          |           | ILMN_1882519 | DA375049      | -0.505603568 |  |  |  |
| ILMN_1687538           | ETS1                   | 0.588272491                         |       |          |           | ILMN_1720710 | HSPB3         | -0.505614628 |  |  |  |
| ILMN_2403889           | PRMT5                  | 0.588156371                         |       |          |           | ILMN_1789407 | CDRT4         | -0.505637331 |  |  |  |
| ILMN_3226467           | AKO23375               | 0.588112626                         |       |          |           | ILMN_1701058 | TATDN1        | -0.505692451 |  |  |  |
| ILMN_1669842           | CHAF1A                 | 0.588112356                         |       |          |           | ILMN_1699912 | SPOVE7P       | -0.5056936   |  |  |  |
| ILMN_3225634           | RPL21                  | 0.588077769                         |       |          |           | ILMN_1686803 | MAGEA11       | -0.505733544 |  |  |  |
| ILMN_2087080           | RPL5                   | 0.588005479                         |       |          |           | ILMN_1800697 | LDB2          | -0.505750611 |  |  |  |
| ILMN_1771697           | VRK3                   | 0.587932698                         |       |          |           | ILMN_1812473 | MLL3          | -0.505792322 |  |  |  |
| ILMN_1757914           | CTBP4                  | 0.587768615                         |       |          |           | ILMN_1824265 | CACNB2        | -0.505859285 |  |  |  |
| ILMN_1757370           | SMPD1                  | 0.587634508                         |       |          |           | ILMN_3292519 | MIR940        | -0.50591876  |  |  |  |
| ILMN_1692849           | ANKRD58                | 0.587599521                         |       |          |           | ILMN_1687291 | CNDF          | -0.505970514 |  |  |  |
| ILMN_1774259           | FAM63B                 | 0.587582795                         |       |          |           | ILMN_3201202 | LOC283028     | -0.505989615 |  |  |  |
| ILMN_1653718           | ZFAND2B                | 0.58757834                          |       |          |           | ILMN_1784607 | UGT1A1        | -0.506011614 |  |  |  |
| ILMN_1679512           | BLCAF                  | 0.587577099                         |       |          |           | ILMN_1780537 | PRRT1         | -0.506035317 |  |  |  |
| ILMN_1699711           | SDCBP                  | 0.587576088                         |       |          |           | ILMN_1699886 | CDP3          | -0.506115613 |  |  |  |
| ILMN_2268713           | LRV21                  | 0.587546277                         |       |          |           | ILMN_3250049 | SLX1B-SLX11A4 | -0.506115881 |  |  |  |
| ILMN_3238018           | NA                     | 0.587534546                         |       |          |           | ILMN_1660307 | BC073927      | -0.506118462 |  |  |  |
| ILMN_1663390           | CDC20                  | 0.58741237                          |       |          |           | ILMN_1736078 | THBS4         | -0.506187408 |  |  |  |
| ILMN_1751803           | LXMO10                 | 0.587321385                         |       |          |           | ILMN_1655613 | GSTA2         | -0.506250387 |  |  |  |
| ILMN_1656042           | XIAO319L               | 0.587309336                         |       |          |           | ILMN_1812473 | KHL24         | -0.506256116 |  |  |  |
| ILMN_1735584           | DCDC32E2               | 0.587213994                         |       |          |           | ILMN_2195638 | CEP71         | -0.506402248 |  |  |  |
| ILMN_3237946           | PXD4                   | 0.587071132                         |       |          |           | ILMN_1667201 | POC1B         | -0.50641454  |  |  |  |
| ILMN_1701875           | ZYX                    | 0.587077588                         |       |          |           | ILMN_1750724 | ZNF879        | -0.506491948 |  |  |  |
| ILMN_1757019           | NTNA                   | 0.586987923                         |       |          |           | ILMN_3310371 | MIR939        | -0.506650607 |  |  |  |
| ILMN_1700674           | RPL23AP53              | 0.586936042                         |       |          |           | ILMN_2323385 | TRIM4         | -0.506815613 |  |  |  |
| ILMN_2339655           | MARF1                  | 0.586880573                         |       |          |           | ILMN_1810210 | DACH2         | -0.506844006 |  |  |  |
| ILMN_1700942           | RBM4                   | 0.586826088                         |       |          |           | ILMN_1615599 | FOXK3         | -0.50683389  |  |  |  |
| ILMN_1806733           | COL18A1                | 0.586231118                         |       |          |           | ILMN_1656915 | PSD3          | -0.506892145 |  |  |  |
| ILMN_2399208           | SCAMP3                 | 0.586092806                         |       |          |           | ILMN_2246311 | STAP1         | -0.507213222 |  |  |  |
| ILMN_2333594           | SUMO2                  | 0.586066717                         |       |          |           | ILMN_1668779 | GRP17         | -0.507265127 |  |  |  |
| ILMN_1805200           | DNM1                   | 0.585722076                         |       |          |           | ILMN_3309059 | MIR93         | -0.507271921 |  |  |  |
| ILMN_1756126           | STUB1                  | 0.585718818                         |       |          |           | ILMN_3246236 | ACNFP         | -0.507319789 |  |  |  |
| ILMN_1747499           | EHM1                   | 0.585677957                         |       |          |           | ILMN_1811854 | NRG1          | -0.507434765 |  |  |  |
| ILMN_1705602           | KHLH17                 | 0.585496213                         |       |          |           | ILMN_2149053 | RIF1          | -0.507451582 |  |  |  |
| ILMN_2261600           | FCGR1B                 | 0.585489826                         |       |          |           | ILMN_3308190 | MIR641        | -0.507556841 |  |  |  |
| ILMN_3232824           | BDP1                   | 0.585467467                         |       |          |           | ILMN_1767142 | ZNF280D       | -0.507647473 |  |  |  |
| ILMN_1679408           | IGF1R                  | 0.585431802                         |       |          |           | ILMN_1700762 | PBX4          | -0.507694577 |  |  |  |
| ILMN_1740505           | SOM3                   | 0.585396633                         |       |          |           | ILMN_1857867 | BX113978      | -0.507721714 |  |  |  |
| ILMN_1696420           | BDP2                   | 0.585315196                         |       |          |           | ILMN_1855107 | AV592785      | -0.507733326 |  |  |  |
| ILMN_1779015           | ZNF467                 | 0.585022866                         |       |          |           | ILMN_1721011 | LCN1          | -0.507737077 |  |  |  |
| ILMN_1762608           | EPG5                   | 0.584995895                         |       |          |           | ILMN_3250032 | XPR1          | -0.507754556 |  |  |  |
| ILMN_2369018           | EV12A                  | 0.584911703                         |       |          |           | ILMN_1732981 | ZBTB32        | -0.507790524 |  |  |  |
| ILMN_1683132           | CBY8                   | 0.584863609                         |       |          |           | ILMN_2379560 | CD14B         | -0.507796608 |  |  |  |
| ILMN_1755304           | DNAAF1                 | 0.58484301                          |       |          |           | ILMN_3193283 | PRF1          | -0.50783216  |  |  |  |
| ILMN_1754197           | APIG2                  | 0.58444575                          |       |          |           | ILMN_1812678 | AGMO          | -0.507891165 |  |  |  |
| ILMN_1652331           | LOC652276              | 0.58430705                          |       |          |           | ILMN_1720606 | LRCH2         | -0.507917489 |  |  |  |
| ILMN_1657771           | CRCC2                  | 0.584320811                         |       |          |           | ILMN_1848086 | BX105881      | -0.507935421 |  |  |  |
| ILMN_1700047           | ALAS1                  | 0.584320176                         |       |          |           | ILMN_1690733 | EGF           | -0.507992945 |  |  |  |
| ILMN_3306742           | SIGMAR1                | 0.584257475                         |       |          |           | ILMN_3310176 | MIR593        | -0.508058914 |  |  |  |
| ILMN_3237966           | KIAA1941               | 0.584178941                         |       |          |           | ILMN_3192567 | RYR2          | -0.508065683 |  |  |  |
| ILMN_1728009           | TMEM171                | 0.584157147                         |       |          |           | ILMN_2231436 | FAM26D        | -0.508192929 |  |  |  |
| ILMN_1712639           | AFM2                   | 0.584127333                         |       |          |           | ILMN_1705153 | NEFH          | -0.508137843 |  |  |  |
| ILMN_1765883           | SICR3A3R2              | 0.584054185                         |       |          |           | ILMN_3253599 | FIS           | -0.508190104 |  |  |  |
| ILMN_1722622           | CD163                  | 0.584036946                         |       |          |           | ILMN_1894388 | NA            | -0.508186395 |  |  |  |
| ILMN_1808712           | RNF40                  | 0.584013114                         |       |          |           | ILMN_1699576 | CDON          | -0.508212446 |  |  |  |
| ILMN_1747504           | AKCTF1                 | 0.583885626                         |       |          |           | ILMN_2342407 | AK2B7T1       | -0.508210021 |  |  |  |
| ILMN_1695821           | ACTR1B                 | 0.583828644                         |       |          |           | ILMN_1728512 | WYHAH         | -0.508269254 |  |  |  |
| ILMN_1709953           | DONSON                 | 0.583715903                         |       |          |           | ILMN_1653031 | ZNF580        | -0.508273812 |  |  |  |
| ILMN_2336728           | DIG3                   | 0.58366225                          |       |          |           | ILMN_1681032 | C16orf54      | -0.508332082 |  |  |  |
| ILMN_3241756           | FAM136A                | 0.583661301                         |       |          |           | ILMN_1651599 | ENTPD2        | -0.508369318 |  |  |  |
| ILMN_1741404           | MSC                    | 0.583638945                         |       |          |           | ILMN_1784870 | CESSA         | -0.508402391 |  |  |  |
| ILMN_3250147           | ZNF626                 | 0.583619525                         |       |          |           | ILMN_1757741 | DACH1         | -0.508424037 |  |  |  |
| ILMN_2049417           | TMEM86B                | 0.583571334                         |       |          |           | ILMN_1806633 | LOC348926     | -0.508486526 |  |  |  |
| ILMN_2391931           | SICL3A2                | 0.583469731                         |       |          |           | ILMN_2206507 | EFC4E         | -0.508658524 |  |  |  |
| ILMN_1691736           | STGALNAC6              | 0.583441936                         |       |          |           | ILMN_1666007 | CCDC155       | -0.508674308 |  |  |  |
| ILMN_2408373           | ARFGAP1                | 0.583440044                         |       |          |           | ILMN_1696450 | KLH1          | -0.508823651 |  |  |  |
| ILMN_1684183           | RAD9A                  | 0.583268412                         |       |          |           | ILMN_2072401 | ORF11H1       | -0.508837063 |  |  |  |
| ILMN_1774596           | B5CL2                  | 0.583261012                         |       |          |           | ILMN_1672545 | GIPC2         | -0.508837445 |  |  |  |
| Annotation Cluster 276 | Enrichment Score: 0.42 |                                     | Count | P_Value  | Benjamini |              |               |              |  |  |  |
|                        | GOTERM_BP_FAT          | positive regulation of endocytosis  | 7     | 1.70E-01 | 8.30E-01  |              |               |              |  |  |  |
|                        | GOTERM_BP_FAT          | positive regulation of phagocytosis | 3     | 4.80E-01 | 9.90E-01  |              |               |              |  |  |  |
|                        | GOTERM_BP_FAT          | regulation of phagocytosis          | 3     | 6.60E-01 | 1.00E+00  |              |               |              |  |  |  |
| Annotation Cluster 277 | Enrichment Score: 0.42 |                                     | Count | P_Value  | Benjamini |              |               |              |  |  |  |
|                        | SP_PIR_KEYWORDS        | selenium                            | 6     | 3.20E-01 | 7.70E-01  |              |               |              |  |  |  |
|                        | GOTERM_MF_FAT          | selenium binding                    | 6     | 3.90E-01 | 9.80E-01  |              |               |              |  |  |  |
|                        | SP_PIR_KEYWORDS        | selenocysteine                      | 5     | 4.40E-01 |           |              |               |              |  |  |  |

|              |          |             |                               |                                                                        |              |                |                  |              |           |              |
|--------------|----------|-------------|-------------------------------|------------------------------------------------------------------------|--------------|----------------|------------------|--------------|-----------|--------------|
| ILMN_2199284 | ANAPC7   | 0.583244201 | UP_SEQ_FEATURE                | domain:GST C-terminal                                                  | 7            | 2.00E-01       | 1.00E+00         | ILMN_1673793 | SUN3      | -0.508853843 |
| ILMN_1812526 | TGFB2    | 0.583193342 | INTERPRO                      | <a href="#">Gluathione S-transferase, N-terminal</a>                   | 5            | 3.00E-01       | 1.00E+00         | ILMN_1818856 | BE549596  | -0.508867708 |
| ILMN_1054195 | GCC2     | 0.583186063 | UP_SEQ_FEATURE                | domain:GST N-terminal                                                  | 4            | 4.80E-01       | 1.00E+00         | ILMN_1871488 | BC027500  | -0.508918321 |
| ILMN_2342859 | NDUFB9   | 0.583163978 | INTERPRO                      | <a href="#">Gluathione S-transferase, C-terminal</a>                   | 4            | 5.00E-01       | 1.00E+00         | ILMN_1812334 | C11w018   | -0.508924118 |
| ILMN_1824052 | AA909514 | 0.583128652 | INTERPRO                      | <a href="#">Gluathione S-transferase, C-terminal-like</a>              | 5            | 5.10E-01       | 1.00E+00         | ILMN_1806434 | PAOR5     | -0.508946491 |
| ILMN_1708900 | TMEM161A | 0.583087238 | INTERPRO                      | <a href="#">Gluathione S-transferase/citrobile channel, C-terminal</a> | 5            | 5.30E-01       | 1.00E+00         | ILMN_1670420 | METAF2    | -0.508972445 |
| ILMN_1699737 | TRAP1    | 0.582973777 | <b>Annotation Cluster 290</b> | <b>Enrichment Score: 0.44</b>                                          | <b>Count</b> | <b>P_Value</b> | <b>Benjamini</b> | ILMN_1701434 | RAP1B     | -0.508975713 |
| ILMN_2103388 | ZBTB49   | 0.582972897 | GOTERM_BP_FAT                 | <a href="#">cell fate specification</a>                                | 11           | 1.30E-01       | 7.50E-01         | ILMN_1796075 | VP5A1     | -0.508979302 |
| ILMN_1708451 | PIGF     | 0.582964946 | GOTERM_BP_FAT                 | <a href="#">dorsal/ventral neural tube patterning</a>                  | 4            | 2.80E-01       | 9.20E-01         | ILMN_1727789 | FAM82A2   | -0.509023802 |
| ILMN_2371051 | ETNA1    | 0.582845007 | GOTERM_BP_FAT                 | <a href="#">neural tube patterning</a>                                 | 4            | 5.00E-01       | 9.80E-01         | ILMN_1724911 | USP7A1    | -0.509057863 |
| ILMN_3200332 | TOMM20   | 0.582835134 | GOTERM_BP_FAT                 | <a href="#">neural tube development</a>                                | 10           | 5.50E-01       | 9.90E-01         | ILMN_2126244 | SC16A     | -0.509287181 |
| ILMN_1657194 | TSNAXIP1 | 0.582601218 | GOTERM_BP_FAT                 | <a href="#">dorsal/ventral pattern formation</a>                       | 5            | 9.60E-01       | 1.00E+00         | ILMN_1673843 | CST2      | -0.509333744 |
| ILMN_2390114 | AP3D1    | 0.582578054 | <b>Annotation Cluster 291</b> | <b>Enrichment Score: 0.39</b>                                          | <b>Count</b> | <b>P_Value</b> | <b>Benjamini</b> | ILMN_2398378 | PML       | -0.509375361 |
| ILMN_1748290 | FAM175A  | 0.582386104 | GOTERM_BP_FAT                 | <a href="#">mitochondrial transport</a>                                | 12           | 3.00E-01       | 9.30E-01         | ILMN_2381855 | SBPB3     | -0.509377631 |
| ILMN_1695983 | DDX42    | 0.582262468 | GOTERM_BP_FAT                 | <a href="#">protein localization in mitochondrion</a>                  | 6            | 4.70E-01       | 9.80E-01         | ILMN_1779034 | MELG1     | -0.509427359 |
| ILMN_1668535 | JOSD1    | 0.5822163   | GOTERM_BP_FAT                 | <a href="#">protein targeting to mitochondrion</a>                     | 6            | 4.70E-01       | 9.80E-01         | ILMN_2345834 | USP17L2   | -0.509441486 |
| ILMN_1806956 | ATAD5    | 0.58211571  | <b>Annotation Cluster 292</b> | <b>Enrichment Score: 0.39</b>                                          | <b>Count</b> | <b>P_Value</b> | <b>Benjamini</b> | ILMN_1696397 | HYDIN     | -0.509452498 |
| ILMN_1696807 | NBP1     | 0.582064201 | INTERPRO                      | <a href="#">Chromo domain</a>                                          | 6            | 3.80E-01       | 1.00E+00         | ILMN_1773333 | TMCO2     | -0.509461002 |
| ILMN_3240721 | TDG      | 0.582058646 | SMART                         | <a href="#">CHROMO</a>                                                 | 6            | 4.20E-01       | 9.70E-01         | ILMN_1855386 | CR622974  | -0.509491676 |
| ILMN_1792681 | CDC6B    | 0.581826461 | UP_SEQ_FEATURE                | domain:Chromo 1                                                        | 3            | 4.40E-01       | 1.00E+00         | ILMN_1761049 | EP2C3     | -0.509498393 |
| ILMN_2147078 | PWWL4    | 0.581793283 | <b>Annotation Cluster 293</b> | <b>Enrichment Score: 0.39</b>                                          | <b>Count</b> | <b>P_Value</b> | <b>Benjamini</b> | ILMN_1792959 | KCNMB2    | -0.509514211 |
| ILMN_1669032 | PRC      | 0.581734773 | UP_SEQ_FEATURE                | domain:CB5 1                                                           | 4            | 3.70E-01       | 1.00E+00         | ILMN_1781256 | LEYF2     | -0.509571813 |
| ILMN_1659158 | SAMD03   | 0.581671553 | UP_SEQ_FEATURE                | domain:CB5 2                                                           | 4            | 3.70E-01       | 1.00E+00         | ILMN_1743594 | UBXN7     | -0.509578889 |
| ILMN_1666910 | GAB1     | 0.581634872 | SP_PIR_KEYWORDS               | <a href="#">CB5 domain</a>                                             | 4            | 4.10E-01       | 8.40E-01         | ILMN_2390416 | BAG6      | -0.509618643 |
| ILMN_1698766 | PYCARD   | 0.581578172 | INTERPRO                      | <a href="#">Cystathionine beta-synthase_core</a>                       | 4            | 4.40E-01       | 1.00E+00         | ILMN_2375386 | RNP51     | -0.509717163 |
| ILMN_1652198 | CGM2     | 0.581393921 | SMART                         | <a href="#">CBS</a>                                                    | 4            | 4.70E-01       | 9.70E-01         | ILMN_1803348 | EHPB1     | -0.509729837 |
| ILMN_2402556 | ZWIL     | 0.581380367 | <b>Annotation Cluster 294</b> | <b>Enrichment Score: 0.39</b>                                          | <b>Count</b> | <b>P_Value</b> | <b>Benjamini</b> | ILMN_1669366 | FTL8      | -0.509772356 |
| ILMN_1797451 | SRGA2P2  | 0.581380395 | GOTERM_BP_FAT                 | <a href="#">chromosome condensation</a>                                | 7            | 1.00E-01       | 6.90E-01         | ILMN_1764043 | TTI       | -0.509792598 |
| ILMN_1738326 | EIF4E2   | 0.58134671  | GOTERM_BP_FAT                 | <a href="#">mitotic chromosome condensation</a>                        | 3            | 5.30E-01       | 9.90E-01         | ILMN_1721549 | PLA2G1B   | -0.50981434  |
| ILMN_1744109 | OR2A42   | 0.581282412 | GOTERM_BP_FAT                 | <a href="#">mitotic sister chromatid segregation</a>                   | 5            | 7.20E-01       | 1.00E+00         | ILMN_1655748 | ZNF323    | -0.509826446 |
| ILMN_2345908 | DDX11    | 0.581238322 | GOTERM_BP_FAT                 | <a href="#">sister chromatid segregation</a>                           | 5            | 7.40E-01       | 1.00E+00         | ILMN_1712530 | AKAP1     | -0.509903957 |
| ILMN_1684699 | ELF5     | 0.581168634 | <b>Annotation Cluster 295</b> | <b>Enrichment Score: 0.39</b>                                          | <b>Count</b> | <b>P_Value</b> | <b>Benjamini</b> | ILMN_3305942 | LOC729970 | -0.510008881 |
| ILMN_1754839 | CHW15    | 0.581105154 | GOTERM_BP_FAT                 | <a href="#">cell morphogenesis involved in differentiation</a>         | 37           | 2.60E-01       | 9.10E-01         | ILMN_2183180 | NA        | -0.510158445 |
| ILMN_1807662 | IGF2R    | 0.581018055 | GOTERM_BP_FAT                 | <a href="#">cellular component morphogenesis</a>                       | 58           | 2.70E-01       | 9.20E-01         | ILMN_2186678 | C6orf211  | -0.510222567 |
| ILMN_1761788 | MOXD1    | 0.581016538 | GOTERM_BP_FAT                 | <a href="#">cell morphogenesis</a>                                     | 52           | 2.80E-01       | 9.30E-01         | ILMN_1716999 | ZSCAN1    | -0.510266089 |
| ILMN_1690494 | RPL6     | 0.58095219  | GOTERM_BP_FAT                 | <a href="#">neuron projection morphogenesis</a>                        | 32           | 3.00E-01       | 9.40E-01         | ILMN_2218104 | PAH       | -0.51026801  |
| ILMN_2243912 | RAB37    | 0.580898438 | GOTERM_BP_FAT                 | <a href="#">cell part morphogenesis</a>                                | 37           | 3.70E-01       | 9.60E-01         | ILMN_1685012 | EAF1      | -0.510330591 |
| ILMN_1764456 | TCEP1    | 0.580762009 | GOTERM_BP_FAT                 | <a href="#">cell projection organization</a>                           | 52           | 3.80E-01       | 9.60E-01         | ILMN_2207726 | FAM46D    | -0.510350389 |
| ILMN_3208881 | SETD8    | 0.580535173 | GOTERM_BP_FAT                 | <a href="#">neuron projection development</a>                          | 36           | 4.00E-01       | 9.80E-01         | ILMN_1764166 | RC3HCB    | -0.510468048 |
| ILMN_1656807 | PLP2     | 0.580406793 | GOTERM_BP_FAT                 | <a href="#">axon guidance</a>                                          | 16           | 4.40E-01       | 9.80E-01         | ILMN_2108590 | THSD7B    | -0.510526583 |
| ILMN_1656017 | NRF1     | 0.580485281 | GOTERM_BP_FAT                 | <a href="#">cell projection morphogenesis</a>                          | 34           | 4.80E-01       | 9.80E-01         | ILMN_1877421 | BXOR92644 | -0.510531852 |
| ILMN_1742824 | SPATA13  | 0.580205101 | GOTERM_BP_FAT                 | <a href="#">axogenesis</a>                                             | 27           | 4.90E-01       | 9.90E-01         | ILMN_1725105 | EEF1E1    | -0.510564276 |
| ILMN_2087646 | HLX      | 0.580169992 | GOTERM_BP_FAT                 | <a href="#">neuron development</a>                                     | 45           | 5.70E-01       | 9.90E-01         | ILMN_1886646 | AIB10925  | -0.510568877 |
| ILMN_1717063 | FKBP9    | 0.580124518 | GOTERM_BP_FAT                 | <a href="#">cell morphogenesis involved in neuron differentiation</a>  | 27           | 6.00E-01       | 1.00E+00         | ILMN_1851912 | BC037850  | -0.510603265 |
| ILMN_1673638 | POSD3    | 0.580076447 | GOTERM_BP_FAT                 | <a href="#">neuron differentiation</a>                                 | 56           | 6.80E-01       | 1.00E+00         | ILMN_1757754 | SUN3B     | -0.510623797 |
| ILMN_3243890 | NDUFA2   | 0.580005055 | <b>Annotation Cluster 296</b> | <b>Enrichment Score: 0.38</b>                                          | <b>Count</b> | <b>P_Value</b> | <b>Benjamini</b> | ILMN_2374791 | FNTA      | -0.510670548 |
| ILMN_1816342 | MTRNR2L1 | 0.579994594 | INTERPRO                      | <a href="#">Phosphoinositide 3-kinase accessory region P1</a>          | 3            | 3.70E-01       | 1.00E+00         | ILMN_1657077 | SOC56     | -0.510679853 |
| ILMN_1675979 | RBM53    | 0.579910556 | SMART                         | <a href="#">P13K</a>                                                   | 3            | 3.90E-01       | 9.70E-01         | ILMN_1705659 | FAM71C    | -0.510721725 |
| ILMN_1789664 | FIGD     | 0.57990717  | GOTERM_MF_FAT                 | <a href="#">inositol or phosphatidylinositol kinase activity</a>       | 6            | 5.30E-01       | 9.90E-01         | ILMN_1726435 | NA        | -0.510877993 |
| ILMN_1740900 | SNAP4    | 0.579884036 | <b>Annotation Cluster 297</b> | <b>Enrichment Score: 0.37</b>                                          | <b>Count</b> | <b>P_Value</b> | <b>Benjamini</b> | ILMN_1748538 | ALDH1A2   | -0.510893713 |
| ILMN_2093443 | PLA8     | 0.579854265 | GOTERM_BP_FAT                 | <a href="#">cell chemotaxis</a>                                        | 8            | 2.50E-01       | 9.10E-01         | ILMN_2101793 | AIB2589   | -0.510991912 |
| ILMN_2317658 | SLC3A2   | 0.579838798 | GOTERM_BP_FAT                 | <a href="#">leukocyte migration</a>                                    | 10           | 3.40E-01       | 9.50E-01         | ILMN_1660778 | ANKH      | -0.511016345 |
| ILMN_1696814 | SEPECS   | 0.579541657 | GOTERM_BP_FAT                 | <a href="#">leukocyte chemotaxis</a>                                   | 6            | 5.90E-01       | 9.90E-01         | ILMN_1724699 | ACAD8     | -0.511065076 |
| ILMN_2327947 | SLC25A25 | 0.579425099 | GOTERM_BP_FAT                 | <a href="#">neurotrophil chemotaxis</a>                                | 3            | 7.10E-01       | 1.00E+00         | ILMN_1669773 | ANGPT11   | -0.511075038 |
| ILMN_1795356 | DCTN1    | 0.579402523 |                               |                                                                        |              |                |                  | ILMN_2200210 | GIA10     | -0.511143405 |
| ILMN_2308582 | CY5B3    | 0.579314741 |                               |                                                                        |              |                |                  | ILMN_2174834 | ORAC3     | -0.511197128 |
| ILMN_3183573 | NA       | 0.579366133 |                               |                                                                        |              |                |                  | ILMN_1744832 | LOC399715 | -0.511236675 |
| ILMN_1794374 | PER2     | 0.579321184 |                               |                                                                        |              |                |                  | ILMN_3211472 | LOC221442 | -0.511288591 |
| ILMN_1669674 | CNP3     | 0.579200192 |                               |                                                                        |              |                |                  | ILMN_1688380 | AA213559  | -0.511302205 |
| ILMN_1666894 | CSPG4    | 0.57918953  |                               |                                                                        |              |                |                  | ILMN_3247552 | KNCN      | -0.511430193 |
| ILMN_2398711 | SIRT2    | 0.579189159 |                               |                                                                        |              |                |                  | ILMN_1748352 | CTL2      | -0.511568058 |
| ILMN_1676213 | SRP2     | 0.579180757 |                               |                                                                        |              |                |                  | ILMN_1745817 | NELL1     | -0.511657934 |
| ILMN_2300695 | KCF3     | 0.579132176 |                               |                                                                        |              |                |                  | ILMN_3241944 | Nblu00301 | -0.511663456 |
| ILMN_1698323 | PLEKH82  | 0.579119712 |                               |                                                                        |              |                |                  | ILMN_1681994 | AJ005282  | -0.511710008 |
| ILMN_1711368 | TRAPPC9  | 0.579019574 |                               |                                                                        |              |                |                  | ILMN_1716377 | HMGCLL1   | -0.511839757 |
| ILMN_1749752 | GAR1     | 0.578980616 |                               |                                                                        |              |                |                  | ILMN_1680727 | GLRX2     | -0.511840971 |
| ILMN_1666280 | COX11    | 0.578877596 |                               |                                                                        |              |                |                  | ILMN_1699674 | ZNF703    | -0.511859723 |
| ILMN_1731609 | CHMP9    | 0.578875738 |                               |                                                                        |              |                |                  | ILMN_1879041 | BAG37950  | -0.511876616 |
| ILMN_1695792 | CUL4A    | 0.578854416 |                               |                                                                        |              |                |                  | ILMN_1701630 | FAM74A4   | -0.511911006 |
| ILMN_1715674 | ITPK1    | 0.578848896 |                               |                                                                        |              |                |                  | ILMN_2151488 | RM1       | -0.511917017 |
| ILMN_1664294 | LEPRE1   | 0.578521179 |                               |                                                                        |              |                |                  | ILMN_3256789 | NA        | -0.51195306  |
| ILMN_1704383 | TRIM37   | 0.578495202 |                               |                                                                        |              |                |                  | ILMN_2173500 | FAM69C    | -0.511991276 |
| ILMN_1762260 | C3       | 0.578448725 |                               |                                                                        |              |                |                  | ILMN_1811544 | LPAL2     | -0.512004982 |
| ILMN_1703153 | GLYR1    | 0.578371372 |                               |                                                                        |              |                |                  | ILMN_1674349 | HRASL65   | -0.512084715 |
| ILMN_1791754 | CPT1B    | 0.578284859 |                               |                                                                        |              |                |                  | ILMN_2311020 | DNAIC12   | -0.512166627 |
| ILMN_1759952 | PSMA5    | 0.578211504 |                               |                                                                        |              |                |                  | ILMN_1707652 | KRTAP1-5  | -0.512270831 |
| ILMN_1685202 | KRBA2    | 0.57816883  |                               |                                                                        |              |                |                  | ILMN_2340643 | INSC      | -0.512309445 |
| ILMN_1743130 | PTGFRN   | 0.57808104  |                               |                                                                        |              |                |                  | ILMN_1727626 | KRT39     | -0.512322541 |
| ILMN_1717565 | CLEC18A  | 0.577776739 |                               |                                                                        |              |                |                  | ILMN_3243863 | DB462629  | -0.512340386 |
| ILMN_1768969 | LRB      | 0.577752589 |                               |                                                                        |              |                |                  | ILMN_1815158 | MBO2      | -0.512341812 |
| ILMN_1734895 | SFT2D1   | 0.577550675 |                               |                                                                        |              |                |                  | ILMN_1779412 | OR2AT4    | -0.512374948 |
| ILMN_1798006 | ANKRD35  | 0.577532433 |                               |                                                                        |              |                |                  | ILMN_2319952 | VDR       | -0.512431905 |
| ILMN_1759789 | KATS     | 0.577526783 |                               |                                                                        |              |                |                  | ILMN_1806306 | SV2B      | -0.512520894 |
| ILMN_1763640 | NCKAIP5L | 0.577469662 |                               |                                                                        |              |                |                  | ILMN_1688702 | PIA2      | -0.512599588 |
| ILMN_2173919 | HRP95A   | 0.577469554 |                               |                                                                        |              |                |                  | ILMN_1776383 | LOC642426 | -0.512626312 |
| ILMN_1756927 | TBS1A4   | 0.577436823 |                               |                                                                        |              |                |                  | ILMN_1759277 | OIP5      | -0.512657494 |
| ILMN_3235984 | FLJ45340 | 0.577394705 |                               |                                                                        |              |                |                  | ILMN_1762134 | EOHDC1    | -0.512674063 |
| ILMN_1803624 | TMEM147  | 0.577355314 |                               |                                                                        |              |                |                  | ILMN_2372698 | RGN       | -0.512710403 |
| ILMN_1673604 | YIPF3    | 0.577327078 |                               |                                                                        |              |                |                  | ILMN_1672389 | CRY2      | -0.512736857 |
| ILMN_2411897 | KLF10    | 0.577230304 |                               |                                                                        |              |                |                  | ILMN_1680578 | RRM45     | -0.512791437 |
| ILMN_2311674 | ADCY6    | 0.577174644 |                               |                                                                        |              |                |                  | ILMN_1738418 | SPF1      | -0.512827695 |
| ILMN_1689786 | ASMTL    | 0.576994755 |                               |                                                                        |              |                |                  | ILMN_1675329 | TBC1D3    | -0.512977987 |
| ILMN_1813840 | KDM1A    | 0.57678552  |                               |                                                                        |              |                |                  | ILMN_1390106 | PLP1      | -0.51298346  |
| ILMN_1651229 | IPO13    | 0.576587199 |                               |                                                                        |              |                |                  | ILMN_3244402 | RIMBP3    | -0.513026692 |
| ILMN_2333638 | CTDNEP1  | 0.576556523 |                               |                                                                        |              |                |                  | ILMN_1652017 | PEPF1     | -0.513039306 |
| ILMN_1668249 | LMF1     | 0.576254858 |                               |                                                                        |              |                |                  | ILMN_3386401 | FAM71E2   | -0.513041442 |
| ILMN_1682864 | SPB3     | 0.576477684 |                               |                                                                        |              |                |                  | ILMN_1751943 | MRME      | -0.513054003 |
| ILMN_2124951 | BRMX     | 0.576463745 |                               |                                                                        |              |                |                  | ILMN_1732300 | POLR2C    | -0.513061191 |

|              |           |             |
|--------------|-----------|-------------|
| ILMN_1789186 | OBF1      | 0.576307591 |
| ILMN_1726108 | LASS2     | 0.576265733 |
| ILMN_1758129 | ORGF1     | 0.576170467 |
| ILMN_2343782 | ANKRD36   | 0.576163744 |
| ILMN_1727402 | HCL51     | 0.576072548 |
| ILMN_1815130 | MICALL1   | 0.576060197 |
| ILMN_1683065 | C2orf64   | 0.576007736 |
| ILMN_2405254 | GRB7      | 0.576004985 |
| ILMN_1807492 | PSMC1     | 0.575990179 |
| ILMN_1715005 | ZNF259    | 0.575980852 |
| ILMN_1780292 | MSH5      | 0.575721969 |
| ILMN_1761801 | ZNF761    | 0.575714614 |
| ILMN_1812353 | CSPP1     | 0.575702784 |
| ILMN_2346339 | FOLR1     | 0.575668728 |
| ILMN_1757847 | CL10orf88 | 0.575664049 |
| ILMN_2110908 | NYC       | 0.575623253 |
| ILMN_2256953 | CASZ1     | 0.575584166 |
| ILMN_1864900 | MIAT      | 0.575542942 |
| ILMN_2143250 | FAR1      | 0.575542281 |
| ILMN_2119774 | CPY2R1    | 0.575534704 |
| ILMN_2147105 | NRPL2     | 0.57545748  |
| ILMN_1687074 | CDC14B    | 0.575348925 |
| ILMN_3201115 | PGAM1     | 0.575255011 |
| ILMN_2084059 | SLC12A4   | 0.575232785 |
| ILMN_2306692 | MINK1     | 0.575181906 |
| ILMN_2066060 | HLA-DRB6  | 0.575176307 |
| ILMN_1806037 | TK1       | 0.575118776 |
| ILMN_3258321 | SNRPG     | 0.575005844 |
| ILMN_1773847 | DYNC1I2   | 0.575004184 |
| ILMN_1786139 | VKORC1    | 0.574996115 |
| ILMN_2323633 | TPD52L2   | 0.57492366  |
| ILMN_1780236 | PMX1      | 0.574608026 |
| ILMN_2309602 | HNHPA20B1 | 0.574604042 |
| ILMN_2255310 | RP515A    | 0.574600783 |
| ILMN_2365465 | XBP1      | 0.57452938  |
| ILMN_178650  | VILL      | 0.574502209 |
| ILMN_1813338 | LAG3      | 0.574448777 |
| ILMN_1732060 | ARHGAP1   | 0.574297905 |
| ILMN_1790217 | IFD1      | 0.573971111 |
| ILMN_1777444 | SKX5      | 0.573931504 |
| ILMN_3229033 | TDG       | 0.573861161 |
| ILMN_1657495 | MLEC      | 0.573800323 |
| ILMN_1713934 | LITAF     | 0.573635345 |
| ILMN_1756552 | LAMTOR2   | 0.573595353 |
| ILMN_1717990 | CALD1     | 0.573583008 |
| ILMN_1694057 | EIF3K     | 0.573569342 |
| ILMN_1780315 | PUS11     | 0.573545516 |
| ILMN_1805922 | EBP1      | 0.573166606 |
| ILMN_2358980 | HLK       | 0.573105742 |
| ILMN_2352009 | ACAD10L   | 0.572986959 |
| ILMN_1727051 | DDX19A    | 0.573074555 |
| ILMN_1659075 | HLA-DOA   | 0.572990707 |
| ILMN_1748797 | GRB2      | 0.572973913 |
| ILMN_2398489 | SIGMAR1   | 0.572832512 |
| ILMN_1734410 | BNIP1     | 0.572741785 |
| ILMN_1809433 | BNIP1     | 0.572580122 |
| ILMN_1758229 | OSYX1     | 0.57257423  |
| ILMN_2414007 | NME1      | 0.572514311 |
| ILMN_1717855 | PFDN1     | 0.572354045 |
| ILMN_1809859 | PCGF2     | 0.572311987 |
| ILMN_3202885 | LOC650368 | 0.57228662  |
| ILMN_1796063 | TRIM44    | 0.5722189   |
| ILMN_1672417 | PTPRCAP   | 0.572188816 |
| ILMN_1660871 | NEK6      | 0.57200875  |
| ILMN_1779512 | AP4M1     | 0.571894228 |
| ILMN_2388605 | ACTR2     | 0.571893363 |
| ILMN_1764489 | TBL2      | 0.571791372 |
| ILMN_1714527 | VAMP3     | 0.571790763 |
| ILMN_1679929 | KLF13     | 0.571751061 |
| ILMN_1742224 | SLTM      | 0.571732895 |
| ILMN_1717326 | SLC29A3   | 0.57162815  |
| ILMN_1808999 | ARHGEF19  | 0.571534603 |
| ILMN_1738237 | H51BP3    | 0.571534102 |
| ILMN_3305397 | FOLP1     | 0.571530501 |
| ILMN_1768282 | SNX21     | 0.571519386 |
| ILMN_1762766 | PTPRA     | 0.571410414 |
| ILMN_1671655 | RNASET2   | 0.571406173 |
| ILMN_1743065 | PTPLAD1   | 0.571398085 |
| ILMN_1657554 | TSYL2     | 0.571083423 |
| ILMN_1653292 | PKRFB4    | 0.571042985 |
| ILMN_2144654 | SDPYE2    | 0.571000907 |
| ILMN_1651950 | TPST1     | 0.570981415 |
| ILMN_1672080 | NR2F6     | 0.570880843 |
| ILMN_1654939 | TMEB2     | 0.570876639 |
| ILMN_1692179 | PPP3R9    | 0.570863206 |
| ILMN_2299613 | TMEM150A  | 0.570840572 |
| ILMN_1688452 | LCMT1     | 0.570750815 |
| ILMN_2167729 | ZNF391    | 0.570626513 |
| ILMN_1726342 | BIN2      | 0.570489157 |
| ILMN_1708485 | BN3       | 0.570468997 |
| ILMN_1655161 | MORF1     | 0.570328028 |
| ILMN_2284941 | ABC7      | 0.570268102 |
| ILMN_2163187 | FLJ35776  | 0.570190158 |
| ILMN_1787345 | FKBP11    | 0.570162591 |
| ILMN_1763144 | NEU1      | 0.570127411 |
| ILMN_1687958 | SLC25A22  | 0.570082373 |
| ILMN_2386241 | TGFB2     | 0.570030767 |
| ILMN_2407811 | NEURL4    | 0.569973882 |

|              |              |              |
|--------------|--------------|--------------|
| ILMN_1655545 | ZMYND12      | -0.513103452 |
| ILMN_1754491 | IYD          | -0.513147027 |
| ILMN_1738410 | BCO31945     | -0.513150758 |
| ILMN_1651259 | UGP2         | -0.513199548 |
| ILMN_1810797 | WASF3        | -0.513353295 |
| ILMN_2047480 | Cxorf36      | -0.513358231 |
| ILMN_1802942 | AJ292264     | -0.513475917 |
| ILMN_1662081 | KRTAP3-2     | -0.513583807 |
| ILMN_1699455 | FAM90A7      | -0.513612399 |
| ILMN_1748092 | FBL1         | -0.513613352 |
| ILMN_1693665 | LMS1         | -0.513682537 |
| ILMN_1732080 | SUMO1P3      | -0.513683133 |
| ILMN_2089458 | SASS6        | -0.513743727 |
| ILMN_1737972 | TSPYL5       | -0.513851161 |
| ILMN_1682185 | NTSC2        | -0.513887801 |
| ILMN_2181660 | CKAP2        | -0.513983936 |
| ILMN_1668708 | SPATA3       | -0.513943264 |
| ILMN_2264681 | LETMD1       | -0.513996245 |
| ILMN_1885147 | AW292656     | -0.514037441 |
| ILMN_3251440 | PK3C2A       | -0.514158172 |
| ILMN_1657478 | MAGE2        | -0.514172651 |
| ILMN_1892743 | AA720041     | -0.514164423 |
| ILMN_1698186 | IFNA2        | -0.514248817 |
| ILMN_1867345 | AIO88589     | -0.514252143 |
| ILMN_1807147 | RC3H1        | -0.51431295  |
| ILMN_3247190 | TNS1         | -0.5143498   |
| ILMN_1795170 | SLITRK2      | -0.514317005 |
| ILMN_1771094 | ACSM3        | -0.514382624 |
| ILMN_1854165 | BM931599     | -0.514463168 |
| ILMN_1692938 | PSAT1        | -0.514522818 |
| ILMN_1760339 | ZNF774       | -0.514536333 |
| ILMN_1744010 | KRTAP4-4     | -0.51474304  |
| ILMN_1727466 | KCNMB94      | -0.514737214 |
| ILMN_1692638 | MYH2         | -0.514835492 |
| ILMN_1813938 | CHCHD4       | -0.514857877 |
| ILMN_1697611 | AMBN         | -0.514891794 |
| ILMN_2183216 | TOP2         | -0.515065882 |
| ILMN_3243324 | FLJ35024     | -0.515133038 |
| ILMN_3213840 | RFP1         | -0.51514415  |
| ILMN_3179368 | GAF2A        | -0.515223867 |
| ILMN_3240147 | Cxorf51      | -0.515240753 |
| ILMN_1868513 | BM727329     | -0.515269199 |
| ILMN_1869146 | BQD07862     | -0.515276746 |
| ILMN_1656988 | LOC646508    | -0.515348956 |
| ILMN_2191803 | MYRN         | -0.515353181 |
| ILMN_1733781 | FSD1         | -0.515437746 |
| ILMN_1703226 | KTIL2        | -0.515442746 |
| ILMN_1855966 | D8338170     | -0.515477257 |
| ILMN_1669805 | C1orf87      | -0.515519371 |
| ILMN_1656981 | LOC10505679  | -0.51555131  |
| ILMN_1748266 | NUP88        | -0.515571    |
| ILMN_1882764 | LOC728852    | -0.515638683 |
| ILMN_1881081 | HIST1H3F     | -0.515763676 |
| ILMN_1839647 | C21orf130    | -0.515831171 |
| ILMN_1846249 | AVG47692     | -0.51583872  |
| ILMN_1726196 | CTSL         | -0.515842171 |
| ILMN_1729513 | CASP14       | -0.515869329 |
| ILMN_1661417 | MAGE2        | -0.515887164 |
| ILMN_1757237 | ASAP2        | -0.515928143 |
| ILMN_1791749 | CLEC2L       | -0.515999429 |
| ILMN_1880885 | AIO42883     | -0.516009536 |
| ILMN_2386444 | ANGPT14      | -0.51600242  |
| ILMN_2120210 | RCAN2        | -0.516182882 |
| ILMN_1720484 | KRTAP        | -0.516215196 |
| ILMN_3236120 | CB991063     | -0.516223508 |
| ILMN_2395506 | SOX6         | -0.516226364 |
| ILMN_1695579 | CT           | -0.516301463 |
| ILMN_1739690 | HPFR2        | -0.516305548 |
| ILMN_3188479 | CCR2         | -0.516334106 |
| ILMN_3307509 | C1orf54      | -0.516511873 |
| ILMN_1681732 | C1orf226     | -0.516534935 |
| ILMN_1743384 | PCCA         | -0.51654711  |
| ILMN_1705617 | EFEMP2       | -0.516602675 |
| ILMN_1778079 | sept-04      | -0.516669984 |
| ILMN_1776826 | ARHGAP42     | -0.516623018 |
| ILMN_2298624 | RREB1        | -0.516647135 |
| ILMN_1753006 | TACR2        | -0.516673993 |
| ILMN_1775716 | GOLGABG      | -0.516716981 |
| ILMN_1799980 | PIGM         | -0.516765059 |
| ILMN_1658152 | MARF210      | -0.516765601 |
| ILMN_1695288 | PDE5A        | -0.516784259 |
| ILMN_1745473 | PDE4DIP      | -0.516829108 |
| ILMN_1731157 | MYO21        | -0.516883718 |
| ILMN_1872450 | A9121163     | -0.516843255 |
| ILMN_2209845 | TM6PS15      | -0.516845481 |
| ILMN_1767481 | YXCCBP1      | -0.516878089 |
| ILMN_1757175 | RPL3L        | -0.516981198 |
| ILMN_1817524 | NA           | -0.517078649 |
| ILMN_2094587 | USP8         | -0.517112111 |
| ILMN_1661566 | FTL4         | -0.517211147 |
| ILMN_1744611 | DCAF13       | -0.517217219 |
| ILMN_1786785 | SLC18A1      | -0.51735363  |
| ILMN_1767777 | ADAR         | -0.517355364 |
| ILMN_1758272 | MYPN         | -0.517376046 |
| ILMN_1804150 | HIBADH       | -0.517410915 |
| ILMN_1728830 | GRK5         | -0.517522324 |
| ILMN_1730401 | LOC444243    | -0.517524844 |
| ILMN_3209156 | LOC100131372 | -0.517565844 |

|              |           |             |
|--------------|-----------|-------------|
| ILMN_2146418 | CRIM1     | 0.56991577  |
| ILMN_1754990 | RPS27A    | 0.56987889  |
| ILMN_292678  | RPL21     | 0.56977258  |
| ILMN_1745686 | MFKA1     | 0.56977169  |
| ILMN_1729430 | FXC018    | 0.569663047 |
| ILMN_1700515 | C17orf58  | 0.569597399 |
| ILMN_1763907 | CENPW     | 0.569585866 |
| ILMN_2115154 | NUPJ2     | 0.569466251 |
| ILMN_1670383 | PCDH7     | 0.569453878 |
| ILMN_1808946 | PCLC21A   | 0.569438458 |
| ILMN_3235326 | LOC388796 | 0.569274839 |
| ILMN_1703487 | LMO4      | 0.569267353 |
| ILMN_2248725 | TYSD1     | 0.569205539 |
| ILMN_3238481 | SNORD60   | 0.569158412 |
| ILMN_1667296 | CTCF108   | 0.56877227  |
| ILMN_1721967 | ORZK7     | 0.5687773   |
| ILMN_1757723 | C6orf106  | 0.568710707 |
| ILMN_1756086 | INTS3     | 0.568701397 |
| ILMN_1745075 | RPLP0     | 0.568695043 |
| ILMN_1805247 | SYNRG     | 0.568612894 |
| ILMN_2285996 | KIAA0101  | 0.568486263 |
| ILMN_2261862 | VLDLR     | 0.568423196 |
| ILMN_1665831 | CLPTM1    | 0.568343188 |
| ILMN_1762899 | EGR1      | 0.568195469 |
| ILMN_1673757 | CASP8     | 0.568186399 |
| ILMN_1780663 | KHLH30    | 0.568178901 |
| ILMN_1811574 | MAMP8BP3  | 0.568175969 |
| ILMN_1716728 | C6orf64   | 0.568169984 |
| ILMN_1698258 | DNAIC8    | 0.568094994 |
| ILMN_3242883 | AGAP8     | 0.568088538 |
| ILMN_2166831 | RPS4X     | 0.568073682 |
| ILMN_1712487 | EIF2D     | 0.567981059 |
| ILMN_1668639 | TTC1D10B  | 0.567905126 |
| ILMN_2114720 | SLPI      | 0.567273158 |
| ILMN_1693009 | FGL2      | 0.567243378 |
| ILMN_3263329 | GAR1      | 0.566981855 |
| ILMN_2179022 | CDRT15P   | 0.566968074 |
| ILMN_1720857 | SMAD4     | 0.566946573 |
| ILMN_1763080 | GNAQ5     | 0.566888226 |
| ILMN_1780639 | MOMD      | 0.566654627 |
| ILMN_3283563 | AK130934  | 0.566594327 |
| ILMN_2075436 | PDIAP3P   | 0.566570845 |
| ILMN_1757440 | FAM69B    | 0.566537815 |
| ILMN_1735155 | CLB1      | 0.566496951 |
| ILMN_1691201 | FAM121C   | 0.566451928 |
| ILMN_1679025 | RPS3A     | 0.566449321 |
| ILMN_1343291 | EEF1A1    | 0.566440022 |
| ILMN_1674402 | TMEM71    | 0.566301502 |
| ILMN_1734445 | PKDCX     | 0.56611728  |
| ILMN_2366388 | PRDM1     | 0.566101287 |
| ILMN_1811328 | DPY7      | 0.566048885 |
| ILMN_2365307 | CD276     | 0.565997978 |
| ILMN_1680831 | BAZ1B     | 0.565910189 |
| ILMN_1655311 | C15orf61  | 0.565805451 |
| ILMN_1658759 | CKSRAP3   | 0.565765018 |
| ILMN_1831106 | NAH1      | 0.565692624 |
| ILMN_1684571 | RSPH1     | 0.565598358 |
| ILMN_1733221 | SEMA4D    | 0.565462792 |
| ILMN_2181363 | UBE3C     | 0.565328298 |
| ILMN_2297864 | MTMR14    | 0.565287784 |
| ILMN_2136094 | DOZ2      | 0.565090228 |
| ILMN_2382505 | SLC22A1B  | 0.564976445 |
| ILMN_1734138 | TATND2    | 0.564856304 |
| ILMN_1700461 | AARS01    | 0.564748499 |
| ILMN_1669592 | MARCH2    | 0.564698427 |
| ILMN_1701375 | FBXW5     | 0.564620738 |
| ILMN_2067890 | CXCL11    | 0.564574175 |
| ILMN_2381834 | TRIM69    | 0.564518666 |
| ILMN_1807372 | ADORA2A   | 0.564492871 |
| ILMN_1677487 | ANKZF1    | 0.564474946 |
| ILMN_1761199 | SLC02B1   | 0.564428588 |
| ILMN_1740165 | C14orf102 | 0.564426937 |
| ILMN_1784320 | ELMO1     | 0.564424449 |
| ILMN_1700606 | RNF43     | 0.56431674  |
| ILMN_2183692 | PHYHD1    | 0.564337519 |
| ILMN_1807925 | GN2       | 0.564237686 |
| ILMN_1684887 | SPDYE1    | 0.564199484 |
| ILMN_2415189 | ATP1A1    | 0.564104026 |
| ILMN_3289144 | BCO1274   | 0.563927576 |
| ILMN_1708143 | FAM127A   | 0.563938557 |
| ILMN_1662954 | CTT7      | 0.563899685 |
| ILMN_1781514 | PCDH17    | 0.56388909  |
| ILMN_1812091 | FAM20A    | 0.563876756 |
| ILMN_3195253 | RPL7      | 0.563827974 |
| ILMN_1665219 | LTPR4     | 0.563805208 |
| ILMN_1808779 | CSTF3     | 0.563790735 |
| ILMN_1815148 | MAND2A    | 0.56362551  |
| ILMN_3234993 | ROMO1     | 0.56330711  |
| ILMN_1773276 | WHAMML2   | 0.563228656 |
| ILMN_1708101 | LMNB2     | 0.563173824 |
| ILMN_2072603 | MIR414    | 0.562972643 |
| ILMN_1794707 | ATHL1     | 0.562934007 |
| ILMN_1696087 | PHB2      | 0.562858664 |
| ILMN_2373444 | ADORA1    | 0.562792727 |
| ILMN_1672547 | MYO9B     | 0.56275611  |
| ILMN_3233748 | NA        | 0.562651458 |
| ILMN_1819608 | ARRB1     | 0.562635078 |
| ILMN_1750507 | RPL5      | 0.562574789 |

|              |              |              |
|--------------|--------------|--------------|
| ILMN_2376263 | SMARCA1      | -0.517587979 |
| ILMN_1696223 | ATP7B        | -0.517695667 |
| ILMN_1711245 | SCG3         | -0.517800139 |
| ILMN_2045729 | WDR12        | -0.517832813 |
| ILMN_1795839 | SCCPOH       | -0.517859816 |
| ILMN_3245351 | UNC119B      | -0.517875729 |
| ILMN_1730282 | LOC100289656 | -0.517937469 |
| ILMN_1661594 | C2orf42      | -0.517957374 |
| ILMN_1671619 | HM02         | -0.517993271 |
| ILMN_1781104 | MAP2K7       | -0.518037641 |
| ILMN_1698551 | RCN1         | -0.518103455 |
| ILMN_1698379 | MAGEC1       | -0.51818171  |
| ILMN_1734486 | TSEN15       | -0.518198737 |
| ILMN_2054725 | SUGT1        | -0.518276707 |
| ILMN_1308007 | BKG49083     | -0.518320643 |
| ILMN_2135944 | CTSA3        | -0.518486058 |
| ILMN_3298163 | CRS94811     | -0.518470765 |
| ILMN_1800873 | SEZL2        | -0.518493714 |
| ILMN_1714891 | ORZ2A14      | -0.518548434 |
| ILMN_1730646 | WDR87        | -0.518559621 |
| ILMN_1861652 | BC275680     | -0.518616814 |
| ILMN_1661220 | TRM16        | -0.51883035  |
| ILMN_1801045 | SPIN3        | -0.518924112 |
| ILMN_1759870 | ING5         | -0.518982796 |
| ILMN_1755954 | CPEB3        | -0.519002059 |
| ILMN_1729639 | CLDN20       | -0.519042471 |
| ILMN_2395656 | TMEM218      | -0.519073395 |
| ILMN_2406335 | ANKRD17      | -0.519125613 |
| ILMN_1750850 | KLK14        | -0.519125867 |
| ILMN_1696028 | ETNK1        | -0.519202269 |
| ILMN_3226388 | PSG4         | -0.519206953 |
| ILMN_1682110 | HOKA10       | -0.519229026 |
| ILMN_2353023 | DSTW         | -0.51929627  |
| ILMN_1864157 | CR627150     | -0.51932394  |
| ILMN_1658636 | MRE11A       | -0.519329081 |
| ILMN_3194508 | ASAP2        | -0.519333324 |
| ILMN_1865568 | AID43551     | -0.519412699 |
| ILMN_2172735 | EXOC311      | -0.5195244   |
| ILMN_3252033 | AKO9731      | -0.519525978 |
| ILMN_1800642 | RELN         | -0.519540539 |
| ILMN_1667195 | NA           | -0.519581159 |
| ILMN_1727076 | OR10H4       | -0.519703853 |
| ILMN_2091217 | FAM150A      | -0.519737709 |
| ILMN_1682062 | RYR1         | -0.519824885 |
| ILMN_2179339 | WTFAP        | -0.519823836 |
| ILMN_1693932 | LOC285733    | -0.519824637 |
| ILMN_3236437 | PCAN1        | -0.519847087 |
| ILMN_1755631 | WISP3        | -0.519878787 |
| ILMN_1904188 | AW296209     | -0.519999972 |
| ILMN_1695998 | YKIF5        | -0.519992104 |
| ILMN_1752927 | FAM160B1     | -0.52002551  |
| ILMN_1816458 | DR828233     | -0.520102719 |
| ILMN_2152028 | AKO27082     | -0.520109113 |
| ILMN_1826447 | BX107250     | -0.520208094 |
| ILMN_1781761 | ENPP4        | -0.520250482 |
| ILMN_1796029 | ABO51447     | -0.520376542 |
| ILMN_1675520 | CPAMD8       | -0.520405232 |
| ILMN_1781222 | XGPY2        | -0.520432007 |
| ILMN_1799628 | NBR1         | -0.520467557 |
| ILMN_1660882 | CHRM4        | -0.52051197  |
| ILMN_1798187 | MYST2        | -0.520557324 |
| ILMN_2098571 | MYNN         | -0.520667591 |
| ILMN_1674795 | HCG_1997999  | -0.520726294 |
| ILMN_1765734 | TGIF2LX      | -0.520754674 |
| ILMN_1703507 | PPP5K1       | -0.520767727 |
| ILMN_1672884 | MTFMT        | -0.52080178  |
| ILMN_1710512 | PPR2         | -0.520842147 |
| ILMN_2402581 | GCOM1        | -0.520902885 |
| ILMN_1659937 | ZBTB24       | -0.52099169  |
| ILMN_1656225 | DUPD1        | -0.521074483 |
| ILMN_1661458 | ARF1         | -0.521097549 |
| ILMN_1789095 | BMPR2        | -0.521114769 |
| ILMN_3178050 | SPECC1       | -0.521179764 |
| ILMN_1680860 | LEAD2        | -0.52121308  |
| ILMN_1703233 | TBC1D3       | -0.52128896  |
| ILMN_2363097 | SLC9A6       | -0.521390488 |
| ILMN_1699320 | LOC39524     | -0.521399019 |
| ILMN_3274299 | BCO29572     | -0.521403697 |
| ILMN_1674098 | SORBS2       | -0.521421163 |
| ILMN_2073409 | C14orf1      | -0.521474577 |
| ILMN_1768064 | ORS212       | -0.521497976 |
| ILMN_1773886 | MED21        | -0.521509254 |
| ILMN_1758918 | BRD2         | -0.521528043 |
| ILMN_1656746 | DKFZp666c185 | -0.521580109 |
| ILMN_1795869 | KIA1485      | -0.521651385 |
| ILMN_1699676 | C14orf147    | -0.521681578 |
| ILMN_1854359 | BX112865     | -0.521701298 |
| ILMN_2189314 | HGDFL1       | -0.521784898 |
| ILMN_3223953 | NA           | -0.521850137 |
| ILMN_3073491 | AID1366      | -0.521921745 |
| ILMN_1725234 | CYP19A1      | -0.521951705 |
| ILMN_2181540 | YY1          | -0.521971312 |
| ILMN_1673503 | CACNB4       | -0.521983935 |
| ILMN_1708182 | ODF1         | -0.522040607 |
| ILMN_2194467 | SGCB         | -0.522146047 |
| ILMN_1776939 | MS4A1        | -0.522171848 |
| ILMN_1807042 | EU154351     | -0.522235831 |

|              |              |             |
|--------------|--------------|-------------|
| ILMN_1666057 | REEP2        | 0.562557866 |
| ILMN_3249327 | DCS81928     | 0.562459225 |
| ILMN_2363106 | RBM33        | 0.562454471 |
| ILMN_1745223 | CCCA2EP4     | 0.562404666 |
| ILMN_1729640 | ESRP2        | 0.562390562 |
| ILMN_1758337 | ZNF213       | 0.562312648 |
| ILMN_1749634 | PLRG1        | 0.562247861 |
| ILMN_1763264 | MRLP2        | 0.562209736 |
| ILMN_1763228 | MEF2D        | 0.562206792 |
| ILMN_1772605 | FRES3        | 0.562160237 |
| ILMN_3278879 | NA           | 0.562101514 |
| ILMN_1809439 | HMG81        | 0.562031581 |
| ILMN_1763347 | PIK3CB       | 0.561880748 |
| ILMN_1804263 | ZNF76        | 0.561863638 |
| ILMN_1705441 | ZNF593       | 0.56181391  |
| ILMN_3251629 | EIF4A1       | 0.561665242 |
| ILMN_1676665 | CUEC1        | 0.561589605 |
| ILMN_1721833 | IER5         | 0.561582916 |
| ILMN_1809467 | VAMP5        | 0.561564933 |
| ILMN_3224290 | UBE2V1       | 0.561482732 |
| ILMN_3216336 | TPP1         | 0.56140715  |
| ILMN_1665601 | THAP4        | 0.56138817  |
| ILMN_1653161 | SNCG         | 0.561355569 |
| ILMN_2383871 | ZNF74        | 0.561330117 |
| ILMN_1683678 | SPATS2L      | 0.561256825 |
| ILMN_1656316 | ZMYM3        | 0.561213609 |
| ILMN_1691608 | C6orf154     | 0.561061386 |
| ILMN_1808011 | FAM46B       | 0.560995579 |
| ILMN_1760922 | GIT2         | 0.560925396 |
| ILMN_1693685 | NCRNA00116   | 0.560786693 |
| ILMN_1777344 | RPS13        | 0.560657981 |
| ILMN_1755064 | TTC13        | 0.560460504 |
| ILMN_1723862 | NP54         | 0.560302877 |
| ILMN_3251361 | NBP1         | 0.560373609 |
| ILMN_2326712 | BACE2        | 0.560362052 |
| ILMN_2046730 | S100A10      | 0.560224592 |
| ILMN_2206411 | CTAG1B       | 0.560218804 |
| ILMN_1756678 | TMG04        | 0.560211894 |
| ILMN_3243972 | SNORA70B     | 0.560103975 |
| ILMN_1722923 | SIRGAP3      | 0.560105555 |
| ILMN_3239965 | IDO1         | 0.560111791 |
| ILMN_1773352 | CCL5         | 0.560115777 |
| ILMN_1709334 | TM9SF1       | 0.560071286 |
| ILMN_2401135 | PUM1         | 0.560055457 |
| ILMN_1772316 | SUN1         | 0.560005903 |
| ILMN_3265343 | LOC100506144 | 0.559973188 |
| ILMN_1742981 | TUBA1A       | 0.559969364 |
| ILMN_1752877 | PHF1         | 0.559966929 |
| ILMN_1721575 | VPS18        | 0.55995357  |
| ILMN_1713636 | S100A6       | 0.559917131 |
| ILMN_1802525 | URGCP        | 0.559861738 |
| ILMN_1671149 | MEG3         | 0.559814574 |
| ILMN_1653896 | ATRP         | 0.559805475 |
| ILMN_2404512 | PSEN2        | 0.559741251 |
| ILMN_2408877 | MLL3         | 0.55972039  |
| ILMN_1716514 | BCL3         | 0.559649211 |
| ILMN_2367753 | ATP2B4       | 0.559392904 |
| ILMN_3266411 | RPL7         | 0.559190447 |
| ILMN_1683194 | DCN          | 0.559124828 |
| ILMN_2320336 | CLK3         | 0.55906512  |
| ILMN_1718672 | MHP2         | 0.559058795 |
| ILMN_1705611 | AP1M2        | 0.558913618 |
| ILMN_1750495 | XPO5         | 0.558919148 |
| ILMN_1664863 | CTRL         | 0.558884001 |
| ILMN_1651936 | SETD8        | 0.558790154 |
| ILMN_1736180 | FRA1T1       | 0.558754301 |
| ILMN_1781321 | SLC25A38     | 0.558695384 |
| ILMN_1690138 | PHF10        | 0.558555914 |
| ILMN_1787628 | NOP56        | 0.558521602 |
| ILMN_3232921 | CCR2         | 0.558435612 |
| ILMN_1762436 | UBB          | 0.558429894 |
| ILMN_2404548 | CRELD1       | 0.558386677 |
| ILMN_1720344 | NIP42        | 0.558349935 |
| ILMN_3246391 | SNORD52      | 0.558303592 |
| ILMN_1662768 | NHEK2C       | 0.558000368 |
| ILMN_2065783 | EXO2         | 0.557890646 |
| ILMN_1794967 | EIF4ENF1     | 0.557866024 |
| ILMN_1774261 | DOK4         | 0.557861373 |
| ILMN_2127477 | GPRC3        | 0.557832661 |
| ILMN_2363457 | ZHNC16       | 0.557747235 |
| ILMN_1662328 | CNNM3        | 0.557652012 |
| ILMN_1707685 | LOC441242    | 0.557440489 |
| ILMN_1700168 | LARS2        | 0.557431803 |
| ILMN_1764945 | AP3D1        | 0.557208162 |
| ILMN_1690708 | SPTBN1       | 0.557146174 |
| ILMN_2414848 | TBRG4        | 0.557092047 |
| ILMN_1778352 | ABC6         | 0.557089138 |
| ILMN_1787026 | SEC61G       | 0.556793589 |
| ILMN_1654099 | LRIG2        | 0.556675919 |
| ILMN_3282829 | NA           | 0.556657646 |
| ILMN_1746441 | C15orf3      | 0.556506765 |
| ILMN_1673024 | RBM15B       | 0.556566908 |
| ILMN_1659227 | CD79A        | 0.556561974 |
| ILMN_1765116 | PADX         | 0.556513657 |
| ILMN_1705679 | SAB2         | 0.556509732 |
| ILMN_1767747 | HADC2        | 0.556402844 |
| ILMN_1782331 | TDG          | 0.556303615 |
| ILMN_1690826 | TNKS1BP1     | 0.556164428 |

|              |              |              |
|--------------|--------------|--------------|
| ILMN_1801996 | MASP1        | -0.522241656 |
| ILMN_2404033 | ZNF205       | -0.52225747  |
| ILMN_2089329 | SPRY2        | -0.522304997 |
| ILMN_3237589 | PHAX         | -0.522320536 |
| ILMN_1684802 | TAF5         | -0.522338993 |
| ILMN_1664006 | AGL          | -0.522390847 |
| ILMN_2346856 | GGP51        | -0.522483127 |
| ILMN_3237067 | FAM75B       | -0.522483559 |
| ILMN_1778253 | SRC          | -0.522513131 |
| ILMN_2390609 | ANEK1        | -0.522525068 |
| ILMN_1787208 | GOLGA8E      | -0.522690931 |
| ILMN_1684060 | PP1164       | -0.522615314 |
| ILMN_1689852 | PADRE        | -0.522626889 |
| ILMN_1764034 | XCR1         | -0.522627036 |
| ILMN_2406586 | CC2D2A       | -0.522669214 |
| ILMN_3252185 | BCO37739     | -0.522778805 |
| ILMN_3202109 | PERP         | -0.522792566 |
| ILMN_1781884 | KRT12        | -0.522896374 |
| ILMN_1678132 | BCO35390     | -0.523109878 |
| ILMN_3251346 | NOX4         | -0.523167245 |
| ILMN_3251171 | DNASE1L1     | -0.523215851 |
| ILMN_1659893 | DEC1         | -0.523291189 |
| ILMN_3241750 | CNN2         | -0.523417095 |
| ILMN_1884922 | TCRA         | -0.523540002 |
| ILMN_3194480 | LOC728405    | -0.523603483 |
| ILMN_1670918 | INSR         | -0.523664333 |
| ILMN_1685559 | BCO35989     | -0.523613831 |
| ILMN_1767992 | SLC12A6      | -0.523671584 |
| ILMN_2290118 | MEGF9        | -0.523740468 |
| ILMN_1683575 | TM6HE        | -0.523810946 |
| ILMN_2352036 | RTN4         | -0.523841806 |
| ILMN_1885629 | DBO22751     | -0.523962967 |
| ILMN_3131041 | VTRNA1-2     | -0.524015149 |
| ILMN_1776724 | LYPD6        | -0.524270244 |
| ILMN_3251516 | KIAA1609     | -0.524320532 |
| ILMN_1834696 | BQ187514     | -0.524454446 |
| ILMN_2113470 | GSTA1        | -0.524504804 |
| ILMN_1773905 | USP4         | -0.524521062 |
| ILMN_1703170 | CD350900     | -0.524531113 |
| ILMN_3239388 | BCO40221     | -0.524573441 |
| ILMN_1912822 | AW237220     | -0.524655925 |
| ILMN_1683761 | Cxor48       | -0.524686789 |
| ILMN_2131828 | KIR3DL1      | -0.524737011 |
| ILMN_1696513 | PCHDC3       | -0.524841712 |
| ILMN_1652147 | MANGES4      | -0.5249664   |
| ILMN_1696661 | FAM186A      | -0.525023036 |
| ILMN_1777528 | NCBP1        | -0.525108106 |
| ILMN_1747968 | RBM33        | -0.525112618 |
| ILMN_1776216 | MGGT1        | -0.525295972 |
| ILMN_1681688 | LOC545676    | -0.525301783 |
| ILMN_1749612 | IMMP1L       | -0.525327432 |
| ILMN_1835951 | abParts      | -0.525403836 |
| ILMN_1800179 | KCNJ4        | -0.525527021 |
| ILMN_1659214 | CTXN3        | -0.525531519 |
| ILMN_1898723 | BCO90942     | -0.525702578 |
| ILMN_1734198 | RNMT1        | -0.525741703 |
| ILMN_1865043 | BP419082     | -0.525779023 |
| ILMN_3286353 | ITC34        | -0.525778829 |
| ILMN_1680687 | NSF          | -0.525785308 |
| ILMN_1709300 | IL5          | -0.525796211 |
| ILMN_3309659 | MIR181A2     | -0.525819048 |
| ILMN_1695461 | PYPPA        | -0.525913074 |
| ILMN_3248032 | NCCR1        | -0.525925587 |
| ILMN_1701820 | ZNF738       | -0.526042713 |
| ILMN_1702183 | AK125594     | -0.526069183 |
| ILMN_1829052 | BU753580     | -0.526085628 |
| ILMN_1852279 | CK29976      | -0.52621071  |
| ILMN_1758941 | REPS         | -0.526253462 |
| ILMN_1814122 | MDC1         | -0.52630614  |
| ILMN_1882015 | BG951912     | -0.526386839 |
| ILMN_2332795 | ZNF16        | -0.526520983 |
| ILMN_1895897 | BFS14393     | -0.526580628 |
| ILMN_1764087 | SYPL1        | -0.52662957  |
| ILMN_1674243 | TYFC         | -0.526634617 |
| ILMN_3188772 | NA           | -0.526675595 |
| ILMN_1678814 | UBL5         | -0.526737998 |
| ILMN_1745318 | CREM         | -0.52676005  |
| ILMN_1777745 | FAM133B      | -0.526772275 |
| ILMN_1724016 | C15orf44     | -0.52688922  |
| ILMN_1758034 | ETOH         | -0.527142251 |
| ILMN_1711715 | LOC100128184 | -0.527148892 |
| ILMN_1669820 | KRT6C        | -0.527149928 |
| ILMN_3238757 | SEPP1        | -0.527234138 |
| ILMN_1771544 | FMODP        | -0.527248666 |
| ILMN_2335072 | TAF16        | -0.52731818  |
| ILMN_1754708 | TN2          | -0.527327275 |
| ILMN_1804938 | TPRA1        | -0.527420766 |
| ILMN_1754541 | MYCL1        | -0.527477176 |
| ILMN_3251737 | EEF1A1       | -0.527477987 |
| ILMN_2219131 | RPS15        | -0.527499091 |
| ILMN_1814002 | TEAD3        | -0.527509091 |
| ILMN_1681943 | CDRT15P      | -0.527551258 |
| ILMN_3110593 | SNORD116-29  | -0.52758748  |
| ILMN_1687655 | DKFp4342031  | -0.5276005   |
| ILMN_3247261 | RAPGEF2      | -0.527602384 |
| ILMN_1836172 | CN288601     | -0.527716043 |
| ILMN_1795846 | PPP2R5C      | -0.527717538 |
| ILMN_3236004 | ZNF433       | -0.527760071 |



|              |               |             |
|--------------|---------------|-------------|
| ILMN_2331890 | RPL41         | 0.556046707 |
| ILMN_1808295 | SMCR7         | 0.555991448 |
| ILMN_1656380 | LOC52276      | 0.555969993 |
| ILMN_1712545 | S100A3        | 0.555892111 |
| ILMN_1762801 | KLF12         | 0.555811999 |
| ILMN_1792679 | ITGA5         | 0.555770547 |
| ILMN_2387636 | E1F6          | 0.555701989 |
| ILMN_1666444 | RBM51         | 0.555584551 |
| ILMN_1764410 | C22orf13      | 0.555493052 |
| ILMN_2336133 | SULT1A1       | 0.555459958 |
| ILMN_1800461 | CNSN28        | 0.555195088 |
| ILMN_2326270 | ACAP2         | 0.555175418 |
| ILMN_1669447 | PHH1N1        | 0.555153363 |
| ILMN_1672728 | KCTD5         | 0.555123622 |
| ILMN_1794070 | ANKK1         | 0.555107857 |
| ILMN_2400030 | PTM2          | 0.555079976 |
| ILMN_1702322 | ALS2CL        | 0.554985319 |
| ILMN_2323048 | ERP29         | 0.554977704 |
| ILMN_1737146 | TRAM1         | 0.554970294 |
| ILMN_2388539 | CL7orf101     | 0.554929249 |
| ILMN_1730294 | INOCDC        | 0.554913029 |
| ILMN_1740609 | CC115         | 0.554879786 |
| ILMN_2234710 | C12orf60      | 0.554772822 |
| ILMN_1716679 | FAIM          | 0.554758929 |
| ILMN_3201663 | RPL22         | 0.554281208 |
| ILMN_1671437 | MAP3K15       | 0.554279103 |
| ILMN_1764362 | ILM8          | 0.554162064 |
| ILMN_1788283 | COTL1         | 0.554121116 |
| ILMN_1707804 | SLX1B-SULT1A4 | 0.554033819 |
| ILMN_2297824 | UBE2G2        | 0.55398262  |
| ILMN_1701461 | TIMP3         | 0.553810311 |
| ILMN_1672661 | SP110         | 0.553808071 |
| ILMN_1715495 | PAPIN         | 0.553746291 |
| ILMN_1722774 | VPS72         | 0.553666612 |
| ILMN_2157421 | STUB1         | 0.553625456 |
| ILMN_1749676 | KIAA1704      | 0.553554011 |
| ILMN_2336130 | SLX1B-SULT1A4 | 0.553530842 |
| ILMN_1728676 | KIAA0196      | 0.553481449 |
| ILMN_2364357 | RP56A02       | 0.553334434 |
| ILMN_2101034 | CAPN12        | 0.553319189 |
| ILMN_1714489 | CIB2          | 0.553155775 |
| ILMN_2330341 | TCEAL4        | 0.553151803 |
| ILMN_1803744 | SELS          | 0.553145424 |
| ILMN_1674228 | 4BP4b5        | 0.553001198 |
| ILMN_1755737 | IRABD         | 0.552953331 |
| ILMN_1707791 | TAZ           | 0.552623163 |
| ILMN_3205603 | LOC729737     | 0.552575737 |
| ILMN_1685403 | MMP7          | 0.552451843 |
| ILMN_2277077 | PRKAR1A       | 0.552272582 |
| ILMN_2229735 | DKFZ494K1323  | 0.552204984 |
| ILMN_1747386 | GUS3          | 0.552194584 |
| ILMN_2374036 | CTSL1         | 0.552031842 |
| ILMN_2378801 | BCL7A         | 0.551967355 |
| ILMN_2186369 | NCOR1         | 0.551946399 |
| ILMN_1654996 | SMEM1         | 0.551904392 |
| ILMN_1751832 | HPH12         | 0.551852671 |
| ILMN_1757537 | RGAG4         | 0.551753602 |
| ILMN_1802100 | ADAM28        | 0.551723901 |
| ILMN_2307025 | CPNE1         | 0.551695706 |
| ILMN_1655225 | C19orf25      | 0.551691567 |
| ILMN_1762103 | WDR48         | 0.551621848 |
| ILMN_3306011 | DSS1928       | 0.551577863 |
| ILMN_1811775 | CCDC124       | 0.551551552 |
| ILMN_1711005 | CDC25A        | 0.551287794 |
| ILMN_1737205 | MCM4          | 0.551224495 |
| ILMN_1663512 | COX5B         | 0.551186942 |
| ILMN_2220265 | CP            | 0.551139761 |
| ILMN_2379130 | IRAK1         | 0.551080052 |
| ILMN_2170930 | STRC          | 0.550967554 |
| ILMN_2322889 | CCDC144B      | 0.550674938 |
| ILMN_2386292 | ZNF655        | 0.550618276 |
| ILMN_1681415 | SIGLEC7       | 0.550614733 |
| ILMN_3225938 | RPL21         | 0.55059312  |
| ILMN_1664051 | SEC22C        | 0.550403308 |
| ILMN_1737329 | RSL1D1        | 0.550471315 |
| ILMN_2377669 | CD247         | 0.550443582 |
| ILMN_1662065 | WDR92         | 0.550304673 |
| ILMN_2280053 | CRCP          | 0.550143519 |
| ILMN_1799837 | POTEM         | 0.550105244 |
| ILMN_2097790 | CLorf186      | 0.550090936 |
| ILMN_1740276 | CLDN9         | 0.550083191 |
| ILMN_2216838 | DKFZP586I1420 | 0.549888811 |
| ILMN_1781819 | PAP51         | 0.549824449 |
| ILMN_3255759 | HAIUS8        | 0.549703572 |
| ILMN_1781673 | ILRC3742      | 0.549565482 |
| ILMN_1676528 | BTND3A2       | 0.549419859 |
| ILMN_1738784 | PPP2R5A       | 0.549294709 |
| ILMN_1721495 | ADAMTSL2      | 0.5492616   |
| ILMN_2385866 | PHF1          | 0.549196757 |
| ILMN_1659752 | AIDA          | 0.549051519 |
| ILMN_2086417 | NDUP2         | 0.54901723  |
| ILMN_2391976 | SLC45A4       | 0.548952631 |
| ILMN_1710413 | C11orf95      | 0.548885568 |
| ILMN_1774071 | CD177         | 0.548731543 |
| ILMN_1719759 | TNC           | 0.54869356  |
| ILMN_1686367 | HSPA8         | 0.548667234 |
| ILMN_3235832 | CC1A2         | 0.548666473 |
| ILMN_1723884 | ARF4          | 0.548554852 |

|              |              |              |
|--------------|--------------|--------------|
| ILMN_1729816 | VDAC3        | -0.52796326  |
| ILMN_1798433 | LNPEP        | -0.528038321 |
| ILMN_1684563 | SPN4         | -0.5280429   |
| ILMN_1686862 | HLY          | -0.528039071 |
| ILMN_3251545 | CHMP5        | -0.528141001 |
| ILMN_1745811 | TDRD3        | -0.528155948 |
| ILMN_1828225 | AW118209     | -0.528197218 |
| ILMN_1856480 | AKO55323     | -0.528222156 |
| ILMN_1795672 | PHI1-PRR4    | -0.528236982 |
| ILMN_1744656 | PAGES        | -0.528232293 |
| ILMN_1703244 | MAP1LC3B     | -0.528252521 |
| ILMN_1797796 | AMY1A        | -0.528329962 |
| ILMN_1735578 | GUCA2B       | -0.528380623 |
| ILMN_1735905 | LOC283685    | -0.528411699 |
| ILMN_1800488 | CT147A1      | -0.528416635 |
| ILMN_2123119 | MEF5B        | -0.52853477  |
| ILMN_2164152 | ENPEP        | -0.528567465 |
| ILMN_1791623 | LSP1         | -0.528568916 |
| ILMN_2195236 | PGRMC2       | -0.528590042 |
| ILMN_1704576 | ABO45832     | -0.528624065 |
| ILMN_1766605 | CDMM4D10     | -0.528783155 |
| ILMN_1901934 | ZNF338       | -0.528832495 |
| ILMN_1760199 | CALB1        | -0.528853391 |
| ILMN_1661954 | NCRNA00114   | -0.528896237 |
| ILMN_3238259 | SNORA30      | -0.528997457 |
| ILMN_1996810 | GPR182       | -0.529033881 |
| ILMN_1713529 | SEH1A6A      | -0.52917616  |
| ILMN_2246661 | FAM1D1       | -0.529309741 |
| ILMN_1708126 | GOLGA6A      | -0.529316536 |
| ILMN_1717406 | ITC34        | -0.529330857 |
| ILMN_1682206 | GCC1         | -0.529337345 |
| ILMN_3130000 | MIR369       | -0.529380104 |
| ILMN_2338916 | RAD51C       | -0.52942022  |
| ILMN_3288525 | NA           | -0.529429147 |
| ILMN_1703015 | ZRANB2       | -0.529515346 |
| ILMN_1722446 | CDC60        | -0.529567647 |
| ILMN_1749586 | ZNF252       | -0.529574406 |
| ILMN_1729476 | PRKLL1       | -0.529592387 |
| ILMN_1897333 | EXO85B21     | -0.529620632 |
| ILMN_1708152 | BNP12        | -0.529624989 |
| ILMN_1660103 | NA           | -0.529669087 |
| ILMN_1671183 | AMY2A        | -0.529728708 |
| ILMN_1769721 | SP6          | -0.529733388 |
| ILMN_1908274 | AW36020      | -0.529803083 |
| ILMN_2146371 | KCTD6        | -0.529807505 |
| ILMN_1763365 | FAM103A1     | -0.529816034 |
| ILMN_1893228 | BX118370     | -0.529819833 |
| ILMN_1753135 | ALK          | -0.529884301 |
| ILMN_1813517 | DISP2        | -0.529897247 |
| ILMN_2382986 | ZC1H16       | -0.529999699 |
| ILMN_2376142 | URE2W        | -0.530011589 |
| ILMN_3246345 | UCRP         | -0.530259596 |
| ILMN_1678882 | KIR3D51      | -0.530279322 |
| ILMN_1692978 | PLA2G2D      | -0.530373496 |
| ILMN_1757686 | FAM182B      | -0.53041071  |
| ILMN_2339516 | CTH          | -0.53042622  |
| ILMN_1755354 | YBX2         | -0.530496796 |
| ILMN_1671583 | MKRN1        | -0.530590205 |
| ILMN_1719498 | EPHX4        | -0.530651558 |
| ILMN_1718832 | RAB4A        | -0.530678082 |
| ILMN_3248833 | RP226        | -0.530719031 |
| ILMN_1765017 | CD6A2        | -0.530725118 |
| ILMN_1738122 | MTLS         | -0.530810665 |
| ILMN_1803312 | DIMT1L       | -0.530844491 |
| ILMN_1730575 | GCLC         | -0.530858282 |
| ILMN_1680432 | KRTAP4-7     | -0.530871411 |
| ILMN_1654151 | COX6C        | -0.530979797 |
| ILMN_1802611 | SPIN         | -0.531037688 |
| ILMN_1758164 | STC1         | -0.531077624 |
| ILMN_1809652 | UBE2E3       | -0.531133045 |
| ILMN_1749032 | CREB3L1      | -0.531243346 |
| ILMN_1772057 | COL28A1      | -0.531315665 |
| ILMN_1813296 | RDH8         | -0.531417797 |
| ILMN_1673111 | TSEN34       | -0.531421455 |
| ILMN_1863939 | AW085986     | -0.531458797 |
| ILMN_3199529 | FEM1A        | -0.531478936 |
| ILMN_1672122 | PAHTM        | -0.53148948  |
| ILMN_1899147 | AA904384     | -0.531538745 |
| ILMN_1668179 | HNRNPF       | -0.531543316 |
| ILMN_1710075 | FAM69A       | -0.531551474 |
| ILMN_1669034 | CC115        | -0.531627357 |
| ILMN_1679177 | mars-02      | -0.531811449 |
| ILMN_1654583 | CHD1         | -0.531865007 |
| ILMN_1846567 | BX107471     | -0.5318707   |
| ILMN_1796149 | KIF1C        | -0.531893481 |
| ILMN_1819325 | LOC100506368 | -0.531931905 |
| ILMN_1737426 | PCMTD1       | -0.531948275 |
| ILMN_3310201 | MIR181C      | -0.531994805 |
| ILMN_1834324 | BU753119     | -0.532024037 |
| ILMN_2407799 | IL24         | -0.532048838 |
| ILMN_1761511 | SGP1         | -0.532105772 |
| ILMN_1717765 | NUDT11       | -0.532174433 |
| ILMN_2305225 | NDRG4        | -0.532187152 |
| ILMN_3248035 | NTN5         | -0.532190755 |
| ILMN_1785439 | CD798        | -0.532226322 |
| ILMN_1898835 | TMEM183B     | -0.532407771 |
| ILMN_1698988 | CAHP         | -0.532434938 |
| ILMN_1781137 | RPL36A       | -0.532441083 |

|              |           |              |
|--------------|-----------|--------------|
| ILMN_1795739 | MPZL3     | 0.548470148  |
| ILMN_1664631 | ADAM28    | 0.548426626  |
| ILMN_1724293 | KDEL2R    | 0.548317479  |
| ILMN_1672461 | SPPL2B    | 0.548297273  |
| ILMN_1798123 | ELOVL1    | 0.548175559  |
| ILMN_2287157 | BPAG1     | 0.548142558  |
| ILMN_2390859 | NFKB2     | 0.548091018  |
| ILMN_1787248 | SIVA1     | 0.548052612  |
| ILMN_1795969 | FAM120A05 | 0.547992929  |
| ILMN_1688848 | TME4H44   | 0.547902025  |
| ILMN_1690982 | DOT       | 0.547870455  |
| ILMN_2307740 | CD46      | 0.547833741  |
| ILMN_1651315 | HMG208    | 0.547793411  |
| ILMN_2140990 | CAMK1     | 0.547618723  |
| ILMN_2400661 | ZNF526    | 0.547605479  |
| ILMN_1789349 | URQLN4    | 0.547491933  |
| ILMN_1713732 | ABL1      | 0.54742742   |
| ILMN_2411511 | KLK12     | 0.547210037  |
| ILMN_1770940 | CDH1      | 0.547140166  |
| ILMN_1663884 | ARHGFE35  | 0.547115466  |
| ILMN_2344987 | KIAA0895L | 0.54704598   |
| ILMN_2398274 | PYCARD    | 0.547045021  |
| ILMN_1664098 | FASTK     | 0.546986088  |
| ILMN_1702911 | PKG       | 0.546965936  |
| ILMN_3245476 | PHRF1     | 0.546915262  |
| ILMN_1741264 | MRR533    | 0.546913403  |
| ILMN_1663035 | SREBF1    | 0.546804779  |
| ILMN_1797822 | SLEL13    | 0.546716008  |
| ILMN_1776800 | GTPBP6    | 0.546659277  |
| ILMN_1804863 | FKBP15    | 0.546610336  |
| ILMN_1691476 | MYLK      | 0.546545297  |
| ILMN_1723944 | TARP      | 0.546542397  |
| ILMN_2394902 | ACCN4     | 0.546519458  |
| ILMN_1727671 | SSH1      | 0.5464609813 |
| ILMN_1770548 | CLASP2    | 0.546468607  |
| ILMN_3241692 | MICA      | 0.546402273  |
| ILMN_1755024 | IKBKE     | 0.54639941   |
| ILMN_2377459 | CYTH2     | 0.546391413  |
| ILMN_2106227 | KIAA12026 | 0.546305745  |
| ILMN_1836776 | MRRP      | 0.54620522   |
| ILMN_2116127 | NPEPP5    | 0.546099902  |
| ILMN_1696591 | RBI       | 0.54597252   |
| ILMN_1657893 | TXNRD2    | 0.5458622    |
| ILMN_2381121 | ULQC      | 0.545791084  |
| ILMN_1724686 | CLDN1     | 0.545684949  |
| ILMN_3197097 | TSTD1     | 0.545523263  |
| ILMN_3245923 | AK301885  | 0.545437893  |
| ILMN_2397028 | SERPIN8   | 0.545383341  |
| ILMN_1795984 | CL9orf48  | 0.545090743  |
| ILMN_3186158 | NA        | 0.545077695  |
| ILMN_1719656 | MRR38     | 0.545059384  |
| ILMN_1657624 | NSFLIC    | 0.544989647  |
| ILMN_1772387 | TLR2      | 0.544980826  |
| ILMN_1687235 | HPN       | 0.544905253  |
| ILMN_3248608 | QSOX4366  | 0.544903164  |
| ILMN_1761939 | TPRN      | 0.544807836  |
| ILMN_2405915 | MRR511    | 0.544740041  |
| ILMN_1743275 | SH3RF3    | 0.544704479  |
| ILMN_1763828 | MTF1      | 0.5447022    |
| ILMN_1732810 | SNX17     | 0.544513611  |
| ILMN_1729123 | PRR2R4    | 0.544420882  |
| ILMN_1808661 | TOM45     | 0.544410044  |
| ILMN_1661484 | ZBTB45    | 0.544381248  |
| ILMN_1807825 | LY86      | 0.544366888  |
| ILMN_1738147 | NES       | 0.544326304  |
| ILMN_1780598 | PIAS1     | 0.544312478  |
| ILMN_1748591 | ODC1      | 0.544214687  |
| ILMN_1728521 | HDC17     | 0.544001861  |
| ILMN_2313079 | NLRP1     | 0.5440059475 |
| ILMN_2412761 | MAFG      | 0.543916184  |
| ILMN_2367113 | CASP6     | 0.543888427  |
| ILMN_1795922 | ZNF830    | 0.543815951  |
| ILMN_2328707 | TAF1D     | 0.543800779  |
| ILMN_1751708 | ITIH2B    | 0.543733739  |
| ILMN_1730391 | MRR518A   | 0.543664502  |
| ILMN_2268381 | RBBP1     | 0.54362442   |
| ILMN_1737387 | GGT2      | 0.543579454  |
| ILMN_1810045 | NLRP1     | 0.543425088  |
| ILMN_1774836 | PILOD3    | 0.543403167  |
| ILMN_1666049 | NUP214    | 0.543341464  |
| ILMN_1657631 | STAR2     | 0.543272487  |
| ILMN_1757978 | INO80D    | 0.543261268  |
| ILMN_1799819 | MARS      | 0.54322654   |
| ILMN_2379520 | HAGH      | 0.543178362  |
| ILMN_1780329 | MED17     | 0.543141517  |
| ILMN_1673728 | PRLE      | 0.543140294  |
| ILMN_1769606 | PIWIL4    | 0.543110775  |
| ILMN_1658261 | MAPKBP1   | 0.542943202  |
| ILMN_2347380 | ARHGFE11  | 0.542920845  |
| ILMN_2069267 | BAGE      | 0.542920506  |
| ILMN_1764788 | TYRPF1B   | 0.542880447  |
| ILMN_1682953 | PGAM4     | 0.542661504  |
| ILMN_1767135 | SOS1      | 0.542622676  |
| ILMN_2409384 | SIGLEC7   | 0.542471169  |
| ILMN_3233753 | AK29302D  | 0.542444267  |
| ILMN_2231051 | TCPI1L2   | 0.542403923  |
| ILMN_1815759 | CTDP1     | 0.542342455  |
| ILMN_1741003 | ANXA5     | 0.542226376  |

|               |              |              |
|---------------|--------------|--------------|
| ILMN_1788650  | GPHB5        | -0.532510633 |
| ILMN_1658108  | BCD335B2     | -0.532512447 |
| ILMN_1786275  | PAPOLG       | -0.532555341 |
| ILMN_1668900  | UNCX         | -0.532658206 |
| ILMN_1741483  | HPS1         | -0.532718182 |
| ILMN_1776213  | RGM8         | -0.53283568  |
| ILMN_1659885  | ACCS3        | -0.532870249 |
| ILMN_1826616  | BCD29125     | -0.53288203  |
| ILMN_1739954  | C15orf29     | -0.532928866 |
| ILMN_1673553  | PTD1         | -0.532927273 |
| ILMN_1745038  | TAS2R4       | -0.533042138 |
| ILMN_1732913  | LRP6         | -0.533136261 |
| ILMN_1849744  | DA58132      | -0.533166844 |
| ILMN_1718687  | TPPP         | -0.533202081 |
| ILMN_1708982  | OR10K2       | -0.533350103 |
| ILMN_1668035  | CNH          | -0.533383865 |
| ILMN_2148452  | BCAS2        | -0.533367115 |
| ILMN_2191634  | RPL37        | -0.53349909  |
| ILMN_1750885  | LOC644100    | -0.533445309 |
| ILMN_3308460  | MIR135A2     | -0.533539983 |
| ILMN_1731051  | AF125949     | -0.533662411 |
| ILMN_3272227  | PLEKH46      | -0.533504818 |
| ILMN_3249598  | RGS21        | -0.533785511 |
| ILMN_1844128  | BC040862     | -0.533803626 |
| ILMN_2386100  | BUB3         | -0.53398527  |
| ILMN_2118621  | CDPC2        | -0.534042474 |
| ILMN_1885583  | AK12941      | -0.53414883  |
| ILMN_1808306  | SLC26A1      | -0.534163948 |
| ILMN_1859614  | BFS11034     | -0.534183789 |
| ILMN_1654001  | SMC6         | -0.534349892 |
| ILMN_1774091  | FECH         | -0.534355334 |
| ILMN_1860084  | AW237078     | -0.534360006 |
| ILMN_1776325  | UGT2L1       | -0.534430931 |
| ILMN_1756852  | AUP1         | -0.534458304 |
| ILMN_3252901  | LOC100128105 | -0.534500127 |
| ILMN_1716729  | AK129567     | -0.534565247 |
| ILMN_2094905  | COMM4D10     | -0.534583547 |
| ILMN_3296436  | LOC100130992 | -0.534584228 |
| ILMN_1683604  | TARML1       | -0.534623228 |
| ILMN_1743992  | DCP1B        | -0.534633143 |
| ILMN_1871361  | AX747287     | -0.534636393 |
| ILMN_1748601  | CDB8         | -0.534654813 |
| ILMN_1803308  | NA           | -0.534675391 |
| ILMN_1700202  | TMEM435      | -0.534680482 |
| ILMN_1679029  | ZEDA         | -0.534734852 |
| ILMN_1792744  | SLC13A2      | -0.53481082  |
| ILMN_1703140  | NEDD4        | -0.534982604 |
| ILMN_1889633  | BC071821     | -0.535057782 |
| ILMN_1702700  | AF257770     | -0.535070006 |
| ILMN_1866640  | GC5H         | -0.53519158  |
| ILMN_1786125  | CCNA2        | -0.535293891 |
| ILMN_1863114  | A1791835     | -0.535260363 |
| ILMN_1751102  | AMY2A        | -0.53526207  |
| ILMN_1662848  | TXNDC15      | -0.535288042 |
| ILMN_2342554  | TAGLN3       | -0.535292385 |
| ILMN_1807266  | AKG57317     | -0.535389897 |
| ILMN_3245811  | ODF3         | -0.535444591 |
| ILMN_1671265  | ING2         | -0.535467847 |
| ILMN_1799100  | PTX4         | -0.535533814 |
| ILMN_3232786  | LOC100288884 | -0.535543737 |
| ILMN_1732555  | B4GALT6      | -0.535578819 |
| ILMN_3200859  | LOC100131176 | -0.535702658 |
| ILMN_2153485  | NNMAT3       | -0.535721477 |
| ILMN_2375156  | PHF7         | -0.535762823 |
| ILMN_1733396  | CDC25A       | -0.535849041 |
| ILMN_1741971  | KIAA1161     | -0.536134296 |
| ILMN_3306997  | METTL1       | -0.536191817 |
| ILMN_1824554  | DS70923      | -0.53621704  |
| ILMN_1750130  | GSPT1        | -0.536321532 |
| ILMN_3309164  | MIR1185-1    | -0.536324818 |
| ILMN_1667230  | C21orf59     | -0.536328268 |
| ILMN_1748927  | IQCF5        | -0.536360427 |
| ILMN_1722209  | IL2IR        | -0.536374828 |
| ILMN_18025179 | CDS16A55     | -0.53645296  |
| ILMN_1722884  | CRS96G20     | -0.536561716 |
| ILMN_1751465  | BNC1         | -0.536585185 |
| ILMN_3234892  | MARCH11      | -0.536586453 |
| ILMN_3275615  | LOC645249    | -0.536689284 |
| ILMN_1679979  | PLK3         | -0.536690663 |
| ILMN_1853876  | TMEM64       | -0.536791335 |
| ILMN_1673535  | MYLK4        | -0.536834827 |
| ILMN_1751576  | TEX          | -0.536901853 |
| ILMN_1685978  | ATPIF1       | -0.536960534 |
| ILMN_1701454  | OR2L13       | -0.53700668  |
| ILMN_3236289  | TGIF         | -0.53703659  |
| ILMN_1889215  | BFC434110    | -0.537106654 |
| ILMN_1761294  | OR4K15       | -0.537136716 |
| ILMN_1720794  | SNORD4B      | -0.537175271 |
| ILMN_1785159  | ELMOD2       | -0.537256775 |
| ILMN_1671678  | TELR         | -0.537280021 |
| ILMN_1742775  | ZNF1         | -0.537329358 |
| ILMN_1764415  | ZNF585A      | -0.537389014 |
| ILMN_3247792  | LOC100169752 | -0.537424552 |
| ILMN_1659010  | AK124016     | -0.53745543  |
| ILMN_1730658  | YTHDF2       | -0.537491749 |
| ILMN_1722646  | PDE4DIP      | -0.537579839 |
| ILMN_1879135  | BAG73749     | -0.537673782 |
| ILMN_1783287  | S100A14      | -0.537708365 |

|              |              |             |
|--------------|--------------|-------------|
| ILMN_1750658 | HAX1         | 0.542229238 |
| ILMN_1722855 | VEGF8        | 0.542216226 |
| ILMN_1056840 | VP51D3       | 0.542119297 |
| ILMN_1716007 | TME4214      | 0.542116006 |
| ILMN_1756501 | STGALL1      | 0.542097428 |
| ILMN_2212354 | WDR46        | 0.542096377 |
| ILMN_1701466 | PEX16        | 0.541850809 |
| ILMN_1753340 | GGTLC2       | 0.541827883 |
| ILMN_1724825 | PICP2        | 0.541822453 |
| ILMN_1813475 | NERC2        | 0.541795676 |
| ILMN_1669635 | NUP85        | 0.541712927 |
| ILMN_2367469 | CARS         | 0.541700379 |
| ILMN_2385178 | MIB2         | 0.541674885 |
| ILMN_1683175 | C9orf23      | 0.541668346 |
| ILMN_2318508 | HCF1C1       | 0.541611066 |
| ILMN_2120103 | ACAP7        | 0.541555138 |
| ILMN_3271412 | SUMO2        | 0.54152181  |
| ILMN_3247732 | ZRSR2        | 0.541514807 |
| ILMN_1676448 | WDFY1        | 0.541479618 |
| ILMN_2342579 | IL7R         | 0.541455546 |
| ILMN_1795119 | MYH3         | 0.541430329 |
| ILMN_1651236 | GGT1         | 0.541423039 |
| ILMN_3310840 | MIR21        | 0.541388381 |
| ILMN_1682778 | MXR8A        | 0.541303394 |
| ILMN_3213792 | PPIA         | 0.54124109  |
| ILMN_2362847 | PBARA        | 0.541217634 |
| ILMN_1682912 | LOC100132287 | 0.541134745 |
| ILMN_2267787 | HPS1         | 0.5408451   |
| ILMN_2352326 | COASY        | 0.540576871 |
| ILMN_2326578 | NRF1         | 0.540478337 |
| ILMN_1654287 | ADCY9        | 0.54020405  |
| ILMN_1675488 | SLC13A3      | 0.54019794  |
| ILMN_2181125 | NUP9         | 0.540190338 |
| ILMN_1661589 | CD151        | 0.540117332 |
| ILMN_1767717 | SLC2A11      | 0.54005833  |
| ILMN_2349124 | OSPL2        | 0.539949536 |
| ILMN_2391051 | FCGR1B       | 0.539873093 |
| ILMN_2389508 | CR6orf709    | 0.539631863 |
| ILMN_1751887 | PREP         | 0.539617719 |
| ILMN_2355738 | HCENP        | 0.539576879 |
| ILMN_1742781 | KIRREL       | 0.539526951 |
| ILMN_2319344 | APEX1        | 0.539395004 |
| ILMN_1805344 | DDX5         | 0.539366843 |
| ILMN_1699112 | COPB1        | 0.539186748 |
| ILMN_1790562 | ETV3         | 0.539129411 |
| ILMN_2211950 | SRP14        | 0.539074989 |
| ILMN_3236373 | MSL2         | 0.538974533 |
| ILMN_1781155 | LYN          | 0.538868168 |
| ILMN_1717461 | BCD47566     | 0.538819387 |
| ILMN_1800202 | LRIT4        | 0.538798337 |
| ILMN_3185453 | FLJ10661     | 0.538732371 |
| ILMN_1712400 | SERPINB6     | 0.538713818 |
| ILMN_1711189 | EXOSC10      | 0.538637909 |
| ILMN_1664960 | KIAA0284     | 0.538631958 |
| ILMN_1661266 | HLA-DQB1     | 0.538383765 |
| ILMN_2231334 | MYH16        | 0.538299653 |
| ILMN_1766245 | SUPT4H1      | 0.538167372 |
| ILMN_2340877 | MEN1         | 0.53788514  |
| ILMN_2404688 | NUPR1        | 0.537860896 |
| ILMN_2140895 | HCG_1646325  | 0.537733919 |
| ILMN_2388090 | MAPP14       | 0.53758305  |
| ILMN_1698144 | CFH          | 0.53753859  |
| ILMN_1756557 | RASIP1       | 0.537504532 |
| ILMN_3233135 | FAM178A      | 0.537479012 |
| ILMN_1708304 | C11orf16     | 0.537433404 |
| ILMN_1691662 | LOC100101266 | 0.537321273 |
| ILMN_2170356 | POLRMT       | 0.537297131 |
| ILMN_1722905 | HRRP51       | 0.537250863 |
| ILMN_1773567 | LAMA5        | 0.537218604 |
| ILMN_1689111 | CXCL12       | 0.536992172 |
| ILMN_2077094 | C11orf2      | 0.536881035 |
| ILMN_1729580 | NUDT9        | 0.53669573  |
| ILMN_2300727 | NU51         | 0.536587496 |
| ILMN_1751544 | URE2H        | 0.536584945 |
| ILMN_1762732 | AFTH         | 0.536548965 |
| ILMN_2370685 | C6orf1       | 0.536439852 |
| ILMN_1672004 | T0B1         | 0.536365093 |
| ILMN_1701216 | BANP         | 0.536351685 |
| ILMN_2315292 | PAK6         | 0.536345178 |
| ILMN_1767514 | CAPN12       | 0.536342938 |
| ILMN_1788604 | WBP2         | 0.53626292  |
| ILMN_1787673 | PLP          | 0.53626291  |
| ILMN_2178226 | KRT86        | 0.536205852 |
| ILMN_2192072 | MMP7         | 0.536179424 |
| ILMN_1655561 | ADP3         | 0.535981614 |
| ILMN_1786045 | SLC14A5      | 0.535980178 |
| ILMN_1700681 | CD99L2       | 0.535746095 |
| ILMN_1695946 | TRNP1        | 0.535703543 |
| ILMN_2388447 | ARID4A       | 0.535702598 |
| ILMN_2270100 | C6orf204     | 0.535616998 |
| ILMN_1677466 | DISP9        | 0.535580193 |
| ILMN_3283015 | NSA2         | 0.535535073 |
| ILMN_1693394 | BCKDK        | 0.535516944 |
| ILMN_1760688 | SAMD14       | 0.535506964 |
| ILMN_1726289 | C12orf35     | 0.535473852 |
| ILMN_1671374 | C19orf53     | 0.535459705 |
| ILMN_1752451 | CTSH         | 0.535417895 |
| ILMN_1655720 | CNNM4        | 0.535040277 |

|              |              |               |
|--------------|--------------|---------------|
| ILMN_1770641 | KLHL3        | -0.537790774  |
| ILMN_1697469 | SRSF6        | -0.537987811  |
| ILMN_1853920 | BE220010     | -0.538070607  |
| ILMN_3045707 | RIBK1B       | -0.538092958  |
| ILMN_3251398 | KRTAP4-11    | -0.538160907  |
| ILMN_1690796 | OR4F21       | -0.5382357    |
| ILMN_1699011 | GTDC1        | -0.538238891  |
| ILMN_1800445 | NEK10        | -0.538268198  |
| ILMN_1796136 | RAH37        | -0.538312181  |
| ILMN_2367671 | LINA2        | -0.53832712   |
| ILMN_1708482 | TMEM80       | -0.538438576  |
| ILMN_1716658 | ZNF543       | -0.538471706  |
| ILMN_1799020 | MUC12        | -0.538582241  |
| ILMN_1728883 | AB074415     | -0.538704771  |
| ILMN_1773395 | BLOC1S1-RDH5 | -0.538837959  |
| ILMN_1773289 | RPL4         | -0.538931441  |
| ILMN_3281719 | LOC100131174 | -0.539022976  |
| ILMN_2167011 | ECHDC1       | -0.539186822  |
| ILMN_2350607 | C20orf7      | -0.539241988  |
| ILMN_1768719 | RDH11        | -0.539289812  |
| ILMN_1795949 | CDOR7        | -0.539330132  |
| ILMN_2166457 | HFGD         | -0.539380524  |
| ILMN_2052208 | GADD45A      | -0.539559446  |
| ILMN_1784678 | PBX1         | -0.539612578  |
| ILMN_1728933 | GOLGA6L1     | -0.539626258  |
| ILMN_1710354 | KIFC3        | -0.539784686  |
| ILMN_1813427 | FLH1327      | -0.539830729  |
| ILMN_1666364 | COG10A       | -0.540078269  |
| ILMN_1696537 | DDIT4L       | -0.540110826  |
| ILMN_3250110 | LOC283116    | -0.540213531  |
| ILMN_3227263 | SLC22A23     | -0.540285435  |
| ILMN_1720267 | TARSL2       | -0.540458407  |
| ILMN_1696751 | AIG3G007     | -0.540467477  |
| ILMN_1802192 | C10orf99     | -0.540474559  |
| ILMN_2389810 | ATP11C       | -0.540871493  |
| ILMN_1662852 | IQCC         | -0.540915052  |
| ILMN_2312304 | INTS6        | -0.540935378  |
| ILMN_1721758 | IDA          | -0.541142078  |
| ILMN_1811880 | SLC34A3      | -0.541201378  |
| ILMN_2384158 | INGA3        | -0.541302467  |
| ILMN_1670725 | SYT16        | -0.541352223  |
| ILMN_1776577 | DSCC1        | -0.541352258  |
| ILMN_2198408 | MFF          | -0.541373972  |
| ILMN_1769280 | SPRY1        | -0.541473888  |
| ILMN_1709635 | SLC38A11     | -0.541502317  |
| ILMN_3239568 | MYLK4        | -0.541586368  |
| ILMN_1651660 | TMEM191C     | -0.541598727  |
| ILMN_1891927 | DCBLD1       | -0.541700661  |
| ILMN_2176955 | CUL5         | -0.54177613   |
| ILMN_1765417 | RBBP9        | -0.541856146  |
| ILMN_1692705 | RECLL        | -0.541867697  |
| ILMN_2284222 | CDK18        | -0.541933755  |
| ILMN_2075292 | MAGEA9B      | -0.542009029  |
| ILMN_1731137 | TXNDC9       | -0.542015932  |
| ILMN_1755869 | ORS1T1       | -0.542022023  |
| ILMN_2151304 | KEA          | -0.542049635  |
| ILMN_3202093 | TRIM64B      | -0.542156289  |
| ILMN_1753472 | SUMF1        | -0.542157272  |
| ILMN_1754913 | WDR88        | -0.542204892  |
| ILMN_1740007 | TMPP8511E    | -0.542256616  |
| ILMN_2175764 | HSP90Bb      | -0.542280619  |
| ILMN_3044755 | NA           | -0.542301376  |
| ILMN_1723287 | SLCGA16      | -0.542551788  |
| ILMN_1896082 | CA429570     | -0.542608698  |
| ILMN_3309374 | MIR1301      | -0.542753132  |
| ILMN_1694589 | PAQR8        | -0.54277497   |
| ILMN_1776576 | C1QL3        | -0.542879033  |
| ILMN_3205803 | AC97P3       | -0.542920404  |
| ILMN_1781073 | PTPN5        | -0.542942627  |
| ILMN_1741134 | WDR89        | -0.542964113  |
| ILMN_3266304 | LOC100129098 | -0.543018402  |
| ILMN_1889767 | NP1          | -0.543022592  |
| ILMN_1735908 | UTAS         | -0.543039066  |
| ILMN_1730562 | KRTAP7-1     | -0.543042989  |
| ILMN_3240538 | C19orf18     | -0.543072699  |
| ILMN_2073012 | TMEM203      | -0.543094312  |
| ILMN_3242325 | BSPH1        | -0.543118234  |
| ILMN_1715255 | MAGI2        | -0.543124103  |
| ILMN_1804562 | SLC31A1      | -0.543147026  |
| ILMN_3235143 | LOC731379    | -0.543163253  |
| ILMN_1798372 | ANX2P2       | -0.543301654  |
| ILMN_1806683 | LCE4A        | -0.543316736  |
| ILMN_1739582 | H0XA10       | -0.5433546003 |
| ILMN_2174045 | RNF126P1     | -0.543547187  |
| ILMN_1866568 | DB41123      | -0.543641341  |
| ILMN_3030988 | BM719213     | -0.543682523  |
| ILMN_1757287 | MAPK6        | -0.543750109  |
| ILMN_3219380 | NANOGNB      | -0.543825134  |
| ILMN_1666596 | HSPB9        | -0.543912953  |
| ILMN_1687865 | TMOD3        | -0.543934459  |
| ILMN_3047653 | LRN1         | -0.543983697  |
| ILMN_2192779 | GPR15        | -0.544035234  |
| ILMN_3293244 | LOC100131744 | -0.544053958  |
| ILMN_1724669 | RUNX1T1      | -0.544085868  |
| ILMN_3251298 | THNSL1       | -0.544127887  |
| ILMN_3251751 | MFSDB        | -0.54426949   |
| ILMN_2158718 | CHRM2        | -0.544460797  |
| ILMN_3249820 | RIAD1        | -0.54470007   |

|              |             |              |
|--------------|-------------|--------------|
| ILMN_1763267 | ZFYVE28     | 0.534972     |
| ILMN_1770035 | NCOA5       | 0.534948619  |
| ILMN_2375834 | CPE1E       | 0.534760225  |
| ILMN_1807467 | KCNMF       | 0.534731657  |
| ILMN_1784780 | CIC         | 0.534684041  |
| ILMN_1790149 | HGF         | 0.534658546  |
| ILMN_1651657 | ADAM33      | 0.534572917  |
| ILMN_1698386 | NEK9        | 0.534547876  |
| ILMN_1756449 | GNAF1       | 0.534525639  |
| ILMN_1755942 | OZFAR1      | 0.534499119  |
| ILMN_2328972 | DNMT3B      | 0.534147315  |
| ILMN_1661647 | LOC349114   | 0.534122605  |
| ILMN_1695362 | ZNF32       | 0.533963436  |
| ILMN_1694801 | SLC39A4     | 0.533954842  |
| ILMN_1660723 | KDH13       | 0.533945494  |
| ILMN_2154853 | C14orf50    | 0.5339316024 |
| ILMN_1742808 | SF1         | 0.533858637  |
| ILMN_1773228 | DLST        | 0.533777154  |
| ILMN_1727173 | SMARCD1     | 0.533769824  |
| ILMN_1723156 | PTPRA       | 0.533488614  |
| ILMN_1685002 | RCE1        | 0.533429185  |
| ILMN_1756920 | ADAM15      | 0.533424331  |
| ILMN_1749667 | OBSN        | 0.5334162    |
| ILMN_2358069 | MAD1L1      | 0.533393302  |
| ILMN_2191759 | HNRNP1A1    | 0.533383554  |
| ILMN_1729533 | AP0A1BP     | 0.533292157  |
| ILMN_1655137 | ZCCHC11     | 0.533291834  |
| ILMN_1741334 | KZF4        | 0.533278614  |
| ILMN_1681340 | HSPB11      | 0.533150382  |
| ILMN_1683660 | EIF3H       | 0.533147099  |
| ILMN_3236935 | ARHGDBA     | 0.533129552  |
| ILMN_1765547 | IRF2        | 0.532982021  |
| ILMN_1696110 | TUBGCP3     | 0.532927284  |
| ILMN_1813275 | DUSP22      | 0.532765681  |
| ILMN_1792910 | MNT         | 0.532696659  |
| ILMN_2316173 | AP151       | 0.532649346  |
| ILMN_1716276 | CCL4        | 0.532622653  |
| ILMN_1769911 | SLC38A1     | 0.532599739  |
| ILMN_1852224 | NA          | 0.5325967    |
| ILMN_1695763 | PDIAS       | 0.532570875  |
| ILMN_1724064 | RPS2P32     | 0.532517725  |
| ILMN_1812976 | DDX54       | 0.532398099  |
| ILMN_2387175 | WDR81       | 0.532361853  |
| ILMN_2152111 | ZNF514      | 0.532349033  |
| ILMN_1705213 | TMEM81      | 0.53231113   |
| ILMN_1718299 | PDE6G       | 0.532087042  |
| ILMN_1790918 | ZNF236      | 0.532068655  |
| ILMN_2409793 | MAZ         | 0.531944521  |
| ILMN_1726698 | PSME1       | 0.531890569  |
| ILMN_1857722 | RPS3A       | 0.531870853  |
| ILMN_1677402 | C11orf96    | 0.531759126  |
| ILMN_1802151 | OSBP15      | 0.531755303  |
| ILMN_1806349 | SLC6A8      | 0.531584392  |
| ILMN_3255971 | NA          | 0.531542184  |
| ILMN_1679894 | ZCCHC12     | 0.531457256  |
| ILMN_1671081 | NEURL       | 0.531388889  |
| ILMN_1655765 | MORF21      | 0.531357772  |
| ILMN_1711030 | OPLAH       | 0.531335249  |
| ILMN_1809957 | AP2S1       | 0.53132647   |
| ILMN_1688231 | TREM1       | 0.53128971   |
| ILMN_1725597 | FXYD4       | 0.531227263  |
| ILMN_3205924 | EIF3        | 0.531162051  |
| ILMN_2366334 | FERM1T3     | 0.53108053   |
| ILMN_1736700 | ALDOA       | 0.53100245   |
| ILMN_1718420 | LCE1D       | 0.530965835  |
| ILMN_3247154 | ZNF799      | 0.530912208  |
| ILMN_1726107 | UBE2V1      | 0.530903685  |
| ILMN_1748970 | PRKSL       | 0.530875985  |
| ILMN_2378654 | BIGALTS     | 0.530855601  |
| ILMN_1733579 | EV12A       | 0.530756489  |
| ILMN_3247848 | UNQ2487     | 0.530748531  |
| ILMN_1773018 | CUED2       | 0.530615576  |
| ILMN_2068499 | POU5F1      | 0.530320171  |
| ILMN_1783753 | TNOC12      | 0.530318702  |
| ILMN_2048507 | KLF3        | 0.5302921    |
| ILMN_1741585 | SFMBT1      | 0.530206998  |
| ILMN_2265082 | SRSF10      | 0.530174465  |
| ILMN_1756650 | DGKH        | 0.530077937  |
| ILMN_2277385 | SLC11A4     | 0.530033011  |
| ILMN_2103397 | ZNF234      | 0.529915777  |
| ILMN_3246957 | DKF2666P158 | 0.529961006  |
| ILMN_2140059 | LAMA4       | 0.529922179  |
| ILMN_1718449 | NSUNSP2     | 0.529762937  |
| ILMN_2238389 | LD3         | 0.529456192  |
| ILMN_1709814 | HNRPA11     | 0.529343954  |
| ILMN_1668876 | HECTD2      | 0.52931401   |
| ILMN_1814808 | BFAI        | 0.529223526  |
| ILMN_1697499 | HLA-DRA1    | 0.52916615   |
| ILMN_1772929 | ATPS3       | 0.529146169  |
| ILMN_1772466 | SH2D3A      | 0.529146165  |
| ILMN_1691926 | HSD17B10    | 0.529097842  |
| ILMN_1807072 | CGSR2       | 0.529093683  |
| ILMN_1800096 | MPST        | 0.529049515  |
| ILMN_3192001 | CCL15       | 0.529006433  |
| ILMN_2353862 | LRRCA8      | 0.528991529  |
| ILMN_1681542 | HST1H4E     | 0.528930419  |
| ILMN_1678268 | VPS8        | 0.528733947  |
| ILMN_2272720 | COL4A3      | 0.528717399  |

|              |              |              |
|--------------|--------------|--------------|
| ILMN_1772603 | LOC644172    | -0.544731758 |
| ILMN_1690480 | FLJ25037     | -0.544736567 |
| ILMN_1738751 | LOC728175    | -0.544795699 |
| ILMN_1700806 | DOX1         | -0.544823727 |
| ILMN_3224022 | BC112987     | -0.544965735 |
| ILMN_2162298 | DYSFIP1      | -0.544984374 |
| ILMN_1782448 | IFNA4        | -0.545041089 |
| ILMN_1729281 | SPHK2        | -0.54505441  |
| ILMN_1685441 | ASAP3        | -0.545074721 |
| ILMN_2377174 | SYPL1        | -0.54511237  |
| ILMN_1721365 | ZNF847P      | -0.545141947 |
| ILMN_2297205 | ATRN         | -0.545119805 |
| ILMN_2275533 | DIAPH3       | -0.545198024 |
| ILMN_1711514 | COCH         | -0.545222756 |
| ILMN_2142961 | IEAP2        | -0.545258022 |
| ILMN_1810337 | HNRNPUL2     | -0.545283015 |
| ILMN_2069224 | PVALB        | -0.545372317 |
| ILMN_1772925 | SORCS2       | -0.545562323 |
| ILMN_1680353 | NSF          | -0.545661197 |
| ILMN_3308555 | SNORD113-7   | -0.545674734 |
| ILMN_1870529 | AUL151944    | -0.545703173 |
| ILMN_1730851 | PDEEC        | -0.545706679 |
| ILMN_1819982 | NA           | -0.545778064 |
| ILMN_3188180 | CR599196     | -0.54581573  |
| ILMN_1788538 | NCALD        | -0.545833937 |
| ILMN_1778901 | C6orf132     | -0.545926988 |
| ILMN_1857158 | RNF168       | -0.54591253  |
| ILMN_1722850 | VGLL2        | -0.545998209 |
| ILMN_2353030 | GRAP         | -0.546078802 |
| ILMN_1762192 | KIF9         | -0.546131414 |
| ILMN_1815239 | AX746743     | -0.546301479 |
| ILMN_1898969 | C17orf107    | -0.546460005 |
| ILMN_2174215 | DIRA3        | -0.546465863 |
| ILMN_1681520 | DGAT2        | -0.546508748 |
| ILMN_1850374 | BC196443     | -0.54652512  |
| ILMN_1771964 | GSTA4        | -0.546540599 |
| ILMN_1765255 | CDH26        | -0.546558247 |
| ILMN_1797312 | NAR32        | -0.546668889 |
| ILMN_2150284 | RNPC3        | -0.54677517  |
| ILMN_1853798 | AA398758     | -0.54678684  |
| ILMN_1866952 | BG698340     | -0.546787289 |
| ILMN_1805063 | GSGL1        | -0.546819209 |
| ILMN_1677292 | C6orf30      | -0.546908178 |
| ILMN_1682399 | CLOCK        | -0.546965754 |
| ILMN_2379707 | AKI23890     | -0.54698218  |
| ILMN_1725971 | TMEM81       | -0.547261668 |
| ILMN_1760320 | GNB1         | -0.547418384 |
| ILMN_1807176 | TAI3         | -0.547429505 |
| ILMN_1901341 | DAP53700     | -0.547532198 |
| ILMN_2186351 | CATSPR2P1    | -0.547532754 |
| ILMN_1720531 | KDM4B        | -0.547533316 |
| ILMN_1793743 | DIRC2        | -0.547599103 |
| ILMN_2231177 | OR7E24       | -0.547705317 |
| ILMN_2273053 | IL15         | -0.54771148  |
| ILMN_1887709 | DA54953      | -0.547896888 |
| ILMN_3142633 | SNORD127     | -0.547927959 |
| ILMN_3181565 | AKO97991     | -0.547957166 |
| ILMN_1739734 | CLTCL1       | -0.54799126  |
| ILMN_2212590 | TMEM170A     | -0.548008024 |
| ILMN_1738955 | ANAPC16      | -0.548012026 |
| ILMN_1705346 | NBEA         | -0.548042101 |
| ILMN_1756489 | ADAM12       | -0.548047957 |
| ILMN_1880113 | BXOR5118     | -0.54814033  |
| ILMN_1749540 | RBM20        | -0.54817952  |
| ILMN_1801938 | NHS          | -0.548444477 |
| ILMN_1720844 | SSX2IP       | -0.548466263 |
| ILMN_1674678 | RBM17A1      | -0.548502182 |
| ILMN_1761058 | NPI35-ACAD11 | -0.548562647 |
| ILMN_1782084 | ALU1L1       | -0.54866893  |
| ILMN_2244699 | MAPK7        | -0.548701103 |
| ILMN_1784207 | PITHD1       | -0.548803897 |
| ILMN_3241262 | PABPC4L      | -0.548824858 |
| ILMN_1727923 | ZNF140       | -0.549029457 |
| ILMN_1703678 | DNM1P33      | -0.549191974 |
| ILMN_2297626 | PEG10        | -0.549202464 |
| ILMN_1808290 | LOC286467    | -0.549331181 |
| ILMN_1751911 | MESP2        | -0.549354906 |
| ILMN_1766247 | ZBTB2        | -0.549753965 |
| ILMN_1762634 | OR10K1       | -0.549956159 |
| ILMN_2365955 | GMPR2        | -0.549954447 |
| ILMN_1765454 | KIAL17B3     | -0.550076951 |
| ILMN_1793549 | PTPNA        | -0.550085832 |
| ILMN_1908074 | AV750156     | -0.550249106 |
| ILMN_3281480 | LOC201651    | -0.550422548 |
| ILMN_1754570 | ACTB8        | -0.550462116 |
| ILMN_1811670 | BE466563     | -0.550450553 |
| ILMN_1806703 | LOC643037    | -0.55059665  |
| ILMN_3270972 | ASAP2        | -0.550618552 |
| ILMN_1894822 | BU570069     | -0.550621799 |
| ILMN_1749410 | PKP4         | -0.550646632 |
| ILMN_3309559 | MIR124-2     | -0.550663066 |
| ILMN_1668453 | TRIM36       | -0.550757792 |
| ILMN_1685496 | RG57         | -0.550758826 |
| ILMN_1685805 | FLJ25758     | -0.550884824 |
| ILMN_1852756 | BG201089     | -0.550893781 |
| ILMN_1770479 | LM07         | -0.550930943 |
| ILMN_2100357 | SNRPD3A      | -0.550987532 |
| ILMN_1658369 | TACR3        | -0.551023719 |

|              |          |             |
|--------------|----------|-------------|
| ILMN_3223871 | ISPD     | 0.52868958  |
| ILMN_2219512 | NHPH4    | 0.528638501 |
| ILMN_1799082 | ZNF099   | 0.528623937 |
| ILMN_2231390 | NHP2     | 0.528585523 |
| ILMN_1750991 | NOL12    | 0.528246995 |
| ILMN_2278413 | VCK3A    | 0.528150016 |
| ILMN_1741406 | HOOK1    | 0.528133577 |
| ILMN_2075051 | PG51     | 0.528092492 |
| ILMN_1770733 | PIC8A    | 0.528077418 |
| ILMN_1675055 | MUL1     | 0.528068243 |
| ILMN_2049021 | PTTG3    | 0.528042838 |
| ILMN_1739368 | ZNF498   | 0.5280338   |
| ILMN_2365111 | MMP4K1   | 0.528024589 |
| ILMN_3276019 | RPL23AP7 | 0.527997782 |
| ILMN_1717975 | CHRF1    | 0.527986666 |
| ILMN_2330307 | SLC13A3  | 0.527944683 |
| ILMN_2051867 | PTCD2    | 0.527820145 |
| ILMN_2154950 | ZNF423   | 0.527773762 |
| ILMN_1810875 | SYNGR1   | 0.527645096 |
| ILMN_1743347 | AKT2     | 0.527591371 |
| ILMN_2210739 | CDH12    | 0.527489436 |
| ILMN_1812478 | ZNH3T3   | 0.527438352 |
| ILMN_2371169 | ZYK      | 0.527369176 |
| ILMN_1752953 | BCL2L12  | 0.527287577 |
| ILMN_2409167 | ANXA2    | 0.527276464 |
| ILMN_1686360 | ZNF124   | 0.527187365 |
| ILMN_2124816 | ZNF34    | 0.527077907 |
| ILMN_1698427 | TNFR2    | 0.527056828 |
| ILMN_1781234 | CCDC22   | 0.527053745 |
| ILMN_1737168 | TH1PA    | 0.527008379 |
| ILMN_1665449 | ROBO4    | 0.526990326 |
| ILMN_1847308 | FAM168A  | 0.526861887 |
| ILMN_1732705 | NFC1     | 0.526830369 |
| ILMN_1730400 | PAX2     | 0.526765809 |
| ILMN_1655893 | NA       | 0.526577173 |
| ILMN_1708959 | MFN1     | 0.526570104 |
| ILMN_1684034 | STAT5B   | 0.526522227 |
| ILMN_1734964 | ZPKX5    | 0.526503942 |
| ILMN_1735979 | CKOHA    | 0.526417418 |
| ILMN_1686116 | THBS1    | 0.526310519 |
| ILMN_1782050 | CEBPD    | 0.526311257 |
| ILMN_1707529 | TMTC1    | 0.526283885 |
| ILMN_1695576 | MIRP124  | 0.526139559 |
| ILMN_1655167 | ZNF302   | 0.526044133 |
| ILMN_1701114 | EBP1     | 0.525866439 |
| ILMN_1691916 | KIAA1919 | 0.525836341 |
| ILMN_2405305 | ARNTL    | 0.525810503 |
| ILMN_1672606 | OAS1     | 0.525552098 |
| ILMN_1658290 | METT122  | 0.525519779 |
| ILMN_1805415 | PDE5A    | 0.525502228 |
| ILMN_1730291 | ATP1B1   | 0.525492118 |
| ILMN_2398039 | TCERG1   | 0.525490282 |
| ILMN_1734950 | LOXL1    | 0.525356521 |
| ILMN_1653438 | PHF14    | 0.525302114 |
| ILMN_1700788 | DENN2D2  | 0.525155731 |
| ILMN_1751572 | TIE1     | 0.525148881 |
| ILMN_2249552 | GTF2A1   | 0.525137061 |
| ILMN_1744508 | FAM33C   | 0.524949967 |
| ILMN_3307729 | CXOC5    | 0.524938267 |
| ILMN_1706326 | MIRP133  | 0.52486245  |
| ILMN_1796490 | GRINA    | 0.524760723 |
| ILMN_1779828 | EDEM1    | 0.524640888 |
| ILMN_1813639 | NKAIN4   | 0.524441169 |
| ILMN_1657888 | SALL1    | 0.524321482 |
| ILMN_2373632 | IDH3B    | 0.524260876 |
| ILMN_2070013 | SLC25A15 | 0.524253532 |
| ILMN_2348788 | CD44     | 0.524249178 |
| ILMN_1762861 | HLA-F    | 0.524214708 |
| ILMN_1752333 | SLC35E1  | 0.524200028 |
| ILMN_2143822 | ZNF148   | 0.524185342 |
| ILMN_1656791 | RP56     | 0.524129558 |
| ILMN_1749789 | HIST1H1D | 0.52412912  |
| ILMN_2371700 | HAIUS7   | 0.524074397 |
| ILMN_1676984 | DOTT3    | 0.523929712 |
| ILMN_1691276 | CXOC1    | 0.523899544 |
| ILMN_1813671 | SLC25A1  | 0.523851164 |
| ILMN_1658677 | DTX3     | 0.523620143 |
| ILMN_1749553 | ENTPD2   | 0.52359935  |
| ILMN_1703650 | TNIP1    | 0.523586044 |
| ILMN_1792176 | TADA3    | 0.523572573 |
| ILMN_2065745 | RAMP3    | 0.52356805  |
| ILMN_2357134 | SPHK1    | 0.523545126 |
| ILMN_1677765 | LRP8     | 0.523538866 |
| ILMN_1784105 | SLC38A7  | 0.52331718  |
| ILMN_1722292 | AVI8     | 0.523268189 |
| ILMN_1750181 | TSC1     | 0.523235359 |
| ILMN_1726189 | MS4A14   | 0.523204352 |
| ILMN_1748908 | PROSC    | 0.523202581 |
| ILMN_1673129 | PCDH12   | 0.52317076  |
| ILMN_1694686 | HMGXB3   | 0.523160047 |
| ILMN_2375999 | CD163    | 0.522967416 |
| ILMN_3248906 | ZC4H2    | 0.522772572 |
| ILMN_2234873 | NME1     | 0.522690164 |
| ILMN_1712389 | CMTM1    | 0.522640904 |
| ILMN_1784785 | COP57B   | 0.522620874 |
| ILMN_2401618 | MLX      | 0.52251382  |
| ILMN_1654016 | MYL12B   | 0.522507458 |
| ILMN_1676069 | ATOK1    | 0.522496934 |

|               |              |              |
|---------------|--------------|--------------|
| ILMN_3289993  | NA           | -0.551078163 |
| ILMN_3242164  | SNORD598     | -0.551111713 |
| ILMN_2382121  | OCRL         | -0.551126133 |
| ILMN_2116516  | SCRN3        | -0.551212324 |
| ILMN_1664235  | BCL2L14      | -0.551249217 |
| ILMN_1743638  | ABCG1        | -0.551322971 |
| ILMN_1706015  | FAM43A       | -0.55148131  |
| ILMN_3263393  | OR7E156P     | -0.551522353 |
| ILMN_1719749  | PTGES1       | -0.551583711 |
| ILMN_1669350  | DNF243411020 | -0.551557082 |
| ILMN_2327812  | ILSR4        | -0.551650263 |
| ILMN_1810488  | NYFC         | -0.551654414 |
| ILMN_1913413  | BX105847     | -0.551661461 |
| ILMN_1824136  | SAMD12       | -0.551673805 |
| ILMN_1706410  | HUS18        | -0.551689745 |
| ILMN_1765044  | CUTC         | -0.551773809 |
| ILMN_2405353  | SDK1         | -0.551824416 |
| ILMN_1791306  | C9orf103     | -0.55187542  |
| ILMN_1789786  | NA           | -0.551913971 |
| ILMN_3191655  | NA           | -0.551962476 |
| ILMN_2189761  | CNEB         | -0.551975346 |
| ILMN_1767590  | TSPY3        | -0.552077969 |
| ILMN_1783313  | VOPP1        | -0.552226183 |
| ILMN_3267631  | LOC100130827 | -0.55224386  |
| ILMN_1675321  | PSM3C1P      | -0.552246644 |
| ILMN_1854469  | AK130049     | -0.552283009 |
| ILMN_2328809  | YWHAF6       | -0.552341853 |
| ILMN_1833027  | AIS9635      | -0.552450134 |
| ILMN_3247152  | RIMBP3       | -0.552499407 |
| ILMN_1795976  | SFXN2        | -0.552536962 |
| ILMN_2287061  | HIF3A        | -0.552605721 |
| ILMN_1703511  | PDRN3        | -0.552705667 |
| ILMN_1779032  | SDHC         | -0.552722075 |
| ILMN_1905072  | CX75B427     | -0.552727766 |
| ILMN_1705458  | OR2W3        | -0.552797848 |
| ILMN_1745141  | MBL1P1       | -0.552825491 |
| ILMN_1706579  | SHBG         | -0.552836216 |
| ILMN_2279844  | LCK          | -0.55288553  |
| ILMN_1659601  | CCL26        | -0.552927747 |
| ILMN_1722502  | CCT6A        | -0.552928547 |
| ILMN_1716342  | CCDC132      | -0.553106491 |
| ILMN_1665824  | G6orf218     | -0.553121024 |
| ILMN_2396697  | GRK2         | -0.553153603 |
| ILMN_2075476  | GIR2C        | -0.553228932 |
| ILMN_1807812  | BX11M471     | -0.553232703 |
| ILMN_2353027  | GRAP         | -0.553281124 |
| ILMN_1738773  | HRC          | -0.553362421 |
| ILMN_2083818  | EXOC8        | -0.553428905 |
| ILMN_3244025  | DUX2         | -0.553470227 |
| ILMN_1704211  | IL2          | -0.553493982 |
| ILMN_1832876  | AW956764     | -0.55356542  |
| ILMN_1780618  | TMEM192      | -0.553627528 |
| ILMN_1683886  | BX484633     | -0.553633171 |
| ILMN_1879078  | A8446688     | -0.553650518 |
| ILMN_1805695  | C6orf170     | -0.553668243 |
| ILMN_1667101  | PRAW3        | -0.553739556 |
| ILMN_1736218  | CHRN83       | -0.553751171 |
| ILMN_1907451  | BCO38752     | -0.553774806 |
| ILMN_1716734  | CNO17        | -0.553780994 |
| ILMN_1769934  | GRHL1        | -0.553802634 |
| ILMN_21313074 | UFM1         | -0.553879724 |
| ILMN_1790253  | TROM74       | -0.553997708 |
| ILMN_1705662  | LRR3C7B      | -0.554126172 |
| ILMN_1713752  | SERINC3      | -0.554149821 |
| ILMN_1716895  | RPA3         | -0.554166208 |
| ILMN_3267612  | SDHC         | -0.554221273 |
| ILMN_1784333  | SECISBP2L    | -0.554340557 |
| ILMN_1768583  | DLAT         | -0.554375017 |
| ILMN_18484529 | AV235716     | -0.554379014 |
| ILMN_1774742  | MTPP         | -0.554399271 |
| ILMN_1690589  | MCL1         | -0.554527216 |
| ILMN_1840508  | A1084979     | -0.554561594 |
| ILMN_1708367  | AKO24951     | -0.554564661 |
| ILMN_1701046  | LOC286467    | -0.554618599 |
| ILMN_1889404  | COL23A1      | -0.554642771 |
| ILMN_1908135  | AA680058     | -0.554783582 |
| ILMN_3237986  | MMGT1        | -0.554811219 |
| ILMN_1666140  | PRY2         | -0.554842401 |
| ILMN_18443198 | AKA          | -0.554878012 |
| ILMN_1808077  | RFX4B        | -0.554946768 |
| ILMN_3178252  | RPS29        | -0.554972166 |
| ILMN_1680072  | ZNF32        | -0.554973842 |
| ILMN_1849941  | AB074280     | -0.55501266  |
| ILMN_1688162  | COL8A1       | -0.55501472  |
| ILMN_1780626  | WDR1         | -0.555051813 |
| ILMN_1808077  | AA789270     | -0.555078395 |
| ILMN_1662038  | LARGE        | -0.555096311 |
| ILMN_1729498  | TMEFF1       | -0.555125894 |
| ILMN_2048683  | FSCB         | -0.555359735 |
| ILMN_1674697  | TSCA         | -0.555409214 |
| ILMN_1751375  | ENAM         | -0.555486979 |
| ILMN_1800703  | NA           | -0.555595386 |
| ILMN_1661596  | FLVCR1       | -0.555746225 |
| ILMN_1843932  | NS4ATP2      | -0.555867654 |
| ILMN_1675421  | ISCA1        | -0.555899222 |
| ILMN_1761000  | ACER2        | -0.555929475 |
| ILMN_2353683  | KLC4         | -0.55611251  |
| ILMN_1663723  | SLC13A4      | -0.55619581  |

|              |                |             |
|--------------|----------------|-------------|
| ILMN_1719695 | NFKBIZ         | 0.522447017 |
| ILMN_3242091 | NCRNA00094     | 0.522399731 |
| ILMN_1781356 | MAP2K3         | 0.522374494 |
| ILMN_3192156 | LOC100130932   | 0.522354084 |
| ILMN_1750511 | NTSCLL         | 0.522292231 |
| ILMN_1704290 | SPTLC2         | 0.522233392 |
| ILMN_1763688 | RNASEK-C17ORF4 | 0.522178606 |
| ILMN_1778304 | ANKHD1         | 0.522173971 |
| ILMN_2047590 | TMEM508        | 0.522165784 |
| ILMN_2127098 | HSP90A4P       | 0.522071778 |
| ILMN_1672176 | SMPD2          | 0.522038044 |
| ILMN_2410864 | RAB28          | 0.522016529 |
| ILMN_2228453 | KIAA0562       | 0.521993089 |
| ILMN_1779492 | SMURF1         | 0.521941258 |
| ILMN_1657421 | YWHAE          | 0.521900665 |
| ILMN_1784661 | TMEM42         | 0.521904543 |
| ILMN_1798874 | TMEM85         | 0.521927533 |
| ILMN_1753547 | STAT5A         | 0.521805762 |
| ILMN_1813911 | HEXA           | 0.521704106 |
| ILMN_1777794 | PRKCSH         | 0.521700002 |
| ILMN_1702538 | CD344          | 0.521697721 |
| ILMN_2399622 | AP1G1          | 0.521653664 |
| ILMN_3199780 | CAP1           | 0.521571789 |
| ILMN_2124757 | DKF2p547f014   | 0.521275019 |
| ILMN_1708098 | LIXL1          | 0.521219837 |
| ILMN_1809488 | SPCS2          | 0.521120207 |
| ILMN_2294442 | SHRPN          | 0.521109539 |
| ILMN_1815086 | NIN1L1         | 0.521155242 |
| ILMN_1744929 | PTGER1         | 0.521150724 |
| ILMN_1681239 | MYO1F          | 0.521145106 |
| ILMN_1684887 | SAMS1          | 0.521063874 |
| ILMN_2229940 | PRAD1          | 0.520938859 |
| ILMN_1709333 | CAC3           | 0.5208309   |
| ILMN_1776077 | D2E121         | 0.520721625 |
| ILMN_2104356 | COL1A2         | 0.520673287 |
| ILMN_2396020 | DUSP6          | 0.520630033 |
| ILMN_1694711 | MAD2L1BP       | 0.520506307 |
| ILMN_1746991 | ABRA           | 0.520491912 |
| ILMN_2374164 | HEPHE1         | 0.520320077 |
| ILMN_1797375 | KLF12          | 0.520193113 |
| ILMN_1773751 | HRAS           | 0.520128879 |
| ILMN_1737918 | C1QA           | 0.519820883 |
| ILMN_1702305 | NCAM1          | 0.519814642 |
| ILMN_1794805 | PPP1R1         | 0.519783808 |
| ILMN_1810334 | CCND3          | 0.519738256 |
| ILMN_3235906 | SNORA28        | 0.51956644  |
| ILMN_1672589 | SEMA4B         | 0.519554333 |
| ILMN_1735910 | VMO1           | 0.519497377 |
| ILMN_1715640 | TRAP1          | 0.519479246 |
| ILMN_2246138 | P2E4BP         | 0.518877982 |
| ILMN_1807044 | UBAC1          | 0.51886113  |
| ILMN_1669555 | FAM48A         | 0.518808566 |
| ILMN_2071809 | MGP            | 0.518723015 |
| ILMN_2078995 | CSRN3          | 0.51868854  |
| ILMN_1701413 | PIGD           | 0.518674161 |
| ILMN_1652005 | KCNMB1         | 0.518583882 |
| ILMN_1663529 | TEX10          | 0.518542176 |
| ILMN_1700822 | DPP3           | 0.518528549 |
| ILMN_1680772 | TCRGV          | 0.51843932  |
| ILMN_2406084 | ITGA11         | 0.51821645  |
| ILMN_1681230 | MRRP4          | 0.518147002 |
| ILMN_1758356 | OR2V5          | 0.517963481 |
| ILMN_1705210 | GRASP          | 0.517799056 |
| ILMN_2276598 | AP1G2          | 0.51777635  |
| ILMN_1775498 | FAM100B        | 0.517734365 |
| ILMN_1772959 | PDCD7          | 0.517590172 |
| ILMN_1805825 | CXCL12         | 0.517572806 |
| ILMN_2331525 | PRKD2          | 0.517489204 |
| ILMN_2405680 | CR3            | 0.517454367 |
| ILMN_2273796 | ANKZF1         | 0.51741558  |
| ILMN_1742547 | NRP1           | 0.517400003 |
| ILMN_2319913 | DGKA           | 0.517274525 |
| ILMN_1738979 | CBY1           | 0.517211147 |
| ILMN_1776522 | SLC5A1         | 0.517183894 |
| ILMN_1693045 | TMED1          | 0.517018521 |
| ILMN_3300972 | SIVA1          | 0.516987218 |
| ILMN_2347541 | NIN            | 0.516840591 |
| ILMN_1736847 | MED8           | 0.516805208 |
| ILMN_1694880 | NAGLU          | 0.516791892 |
| ILMN_2387157 | RPL21          | 0.516672235 |
| ILMN_1766171 | SFN8           | 0.516647631 |
| ILMN_1762725 | EIF3L          | 0.516564962 |
| ILMN_1674386 | PITX1          | 0.51652334  |
| ILMN_1651336 | MLYCD          | 0.516391111 |
| ILMN_2401168 | EXOC10         | 0.516289    |
| ILMN_1750518 | THOC4          | 0.516212261 |
| ILMN_1763260 | HIF1A          | 0.516164064 |
| ILMN_1673566 | ADAMT51        | 0.516111893 |
| ILMN_1679093 | ZNF581         | 0.515722398 |
| ILMN_1695271 | RPP25          | 0.515662243 |
| ILMN_1650047 | HST2D4AA4      | 0.515538729 |
| ILMN_2180371 | CL2orf24       | 0.515470006 |
| ILMN_1743331 | ADIG           | 0.515459529 |
| ILMN_1704195 | FUK            | 0.515425945 |
| ILMN_1795514 | C3orf25        | 0.515382485 |
| ILMN_1657129 | SKAP2          | 0.51525037  |
| ILMN_330013  | PHF1M          | 0.515209336 |
| ILMN_1702055 | RDPN18         | 0.51520158  |

|              |              |              |
|--------------|--------------|--------------|
| ILMN_1727813 | BRP44        | -0.556222907 |
| ILMN_1882881 | DB297507     | -0.556287812 |
| ILMN_1677868 | ADRA2B       | -0.556371215 |
| ILMN_1707654 | MT1          | -0.556560912 |
| ILMN_2358783 | ASB3         | -0.55658734  |
| ILMN_1815570 | HGX6A        | -0.556688057 |
| ILMN_2110561 | IFNA8        | -0.556689377 |
| ILMN_1663422 | RGL4         | -0.556718644 |
| ILMN_1702588 | FAM125B      | -0.556719324 |
| ILMN_1799765 | ACQ21761     | -0.556758941 |
| ILMN_1810400 | IDH3B        | -0.556788772 |
| ILMN_1713174 | TCPI11       | -0.556825414 |
| ILMN_2158548 | NACA2        | -0.556987297 |
| ILMN_1755423 | PTCRA        | -0.557042699 |
| ILMN_3277501 | LOC283028    | -0.557049529 |
| ILMN_1775569 | CNS2         | -0.557052236 |
| ILMN_2106902 | FOXP3        | -0.557109097 |
| ILMN_2099773 | SEMA3D       | -0.55732925  |
| ILMN_3245006 | C12orf68     | -0.557379931 |
| ILMN_3292690 | NA           | -0.55738181  |
| ILMN_2489290 | CCP1         | -0.557402047 |
| ILMN_1779673 | HGFLL1       | -0.557457413 |
| ILMN_1682251 | TLR8         | -0.557487187 |
| ILMN_1805526 | MVL1         | -0.557622537 |
| ILMN_1732336 | RFC2         | -0.557630509 |
| ILMN_3248500 | LOC643955    | -0.557635822 |
| ILMN_1669846 | SLC25A11     | -0.55769048  |
| ILMN_1711772 | FLJ30679     | -0.557719206 |
| ILMN_1903466 | AW592968     | -0.557725606 |
| ILMN_2381064 | TPD52        | -0.557773379 |
| ILMN_3247844 | C4orf10      | -0.557827885 |
| ILMN_1811121 | FAM199X      | -0.558079674 |
| ILMN_1703973 | FLJ0312      | -0.55811862  |
| ILMN_1807702 | BX102609     | -0.558122539 |
| ILMN_1716862 | PPM1B        | -0.558197485 |
| ILMN_1831111 | NA           | -0.558374576 |
| ILMN_1775742 | RNF128       | -0.55852973  |
| ILMN_3239073 | AY34892      | -0.558574419 |
| ILMN_1760787 | FANCA        | -0.558646017 |
| ILMN_1751393 | ZNF684       | -0.558665519 |
| ILMN_1740052 | SPEG         | -0.558691624 |
| ILMN_1847645 | A1200787     | -0.558698163 |
| ILMN_3251540 | GSTA2        | -0.558781817 |
| ILMN_3235584 | TRMM6        | -0.558989384 |
| ILMN_1890986 | BAG61908     | -0.559051156 |
| ILMN_1747598 | PPP1R11      | -0.559014784 |
| ILMN_3188132 | AKO97799     | -0.559043209 |
| ILMN_2341645 | HNRNP33      | -0.559102296 |
| ILMN_3282506 | LOC154860    | -0.559155893 |
| ILMN_1754656 | TCF10        | -0.559209209 |
| ILMN_1912710 | AK294518     | -0.559232884 |
| ILMN_1707065 | SALL3        | -0.559399763 |
| ILMN_2179397 | TATDN1       | -0.55954104  |
| ILMN_1780758 | POURLA       | -0.559674213 |
| ILMN_1782459 | OSBP8        | -0.559712853 |
| ILMN_1808098 | ARG2         | -0.559712465 |
| ILMN_1804661 | KALRN        | -0.559813374 |
| ILMN_1767535 | LOC645676    | -0.559905889 |
| ILMN_1659285 | PSMG1        | -0.560009543 |
| ILMN_1673755 | AY927633     | -0.560098711 |
| ILMN_1769601 | TBCK         | -0.56012482  |
| ILMN_2117885 | FAM122A      | -0.560175981 |
| ILMN_1749081 | AUTS2        | -0.560176297 |
| ILMN_1859334 | B1S17762     | -0.560180476 |
| ILMN_1814726 | SCARB2       | -0.56020409  |
| ILMN_2371001 | ATP6V1G3     | -0.560310718 |
| ILMN_1905413 | BU674282     | -0.560302623 |
| ILMN_1741204 | KLHDC2       | -0.560470386 |
| ILMN_1808217 | PPP1R1C      | -0.560616165 |
| ILMN_224004  | ZMYM3        | -0.56075725  |
| ILMN_1725157 | NEK6         | -0.560798835 |
| ILMN_1915913 | BG722090     | -0.560851175 |
| ILMN_1724753 | NIN          | -0.560993095 |
| ILMN_3135888 | PABPC12A     | -0.561096344 |
| ILMN_1782501 | XAGE1D       | -0.561117747 |
| ILMN_1807339 | HRG          | -0.561232222 |
| ILMN_1738607 | ZNF525       | -0.561299776 |
| ILMN_1670542 | AK2          | -0.56132496  |
| ILMN_1737842 | AMAC1L3      | -0.561358684 |
| ILMN_3129340 | HCC_2014417  | -0.561432411 |
| ILMN_1724266 | LYPD2        | -0.561630927 |
| ILMN_1761804 | ALDH9A1      | -0.561710471 |
| ILMN_3235196 | LOC100129716 | -0.561779222 |
| ILMN_1748831 | PPP1R13B     | -0.561784138 |
| ILMN_3146895 | SNORD37      | -0.561785482 |
| ILMN_1746552 | WDR17        | -0.561786594 |
| ILMN_3308195 | MIR618       | -0.561845155 |
| ILMN_2206224 | OR4M2        | -0.561858639 |
| ILMN_1753931 | CDO1         | -0.561900197 |
| ILMN_2172600 | ZNF345       | -0.561905138 |
| ILMN_1797030 | FGF18        | -0.561917745 |
| ILMN_1839905 | ATAD4A4      | -0.561941853 |
| ILMN_1774410 | HSP01        | -0.561953934 |
| ILMN_1729060 | ARHGEP5      | -0.562035803 |
| ILMN_1743829 | ATXN2        | -0.5620783   |
| ILMN_1808054 | LAMB3        | -0.562139605 |
| ILMN_2350540 | GTF2I        | -0.562167476 |
| ILMN_3237846 | GAGE12I      | -0.562164723 |

|              |           |               |
|--------------|-----------|---------------|
| ILMN_1654318 | PTPN23    | 0.515187622   |
| ILMN_1671725 | REPIN1    | 0.515180488   |
| ILMN_1786242 | RPL14     | 0.5151517611  |
| ILMN_2200141 | BAGE      | 0.5151513462  |
| ILMN_2403896 | GGTL2C    | 0.51515007985 |
| ILMN_1798288 | MORKL2C   | 0.514996638   |
| ILMN_1691341 | IL7R      | 0.514991909   |
| ILMN_3236259 | PPALAA    | 0.5148487     |
| ILMN_1683616 | PLA2R1    | 0.514760022   |
| ILMN_1707277 | CCDC144B  | 0.514663813   |
| ILMN_1680208 | RPL13A    | 0.514557584   |
| ILMN_2167617 | NACA      | 0.514521655   |
| ILMN_2412384 | CNE2      | 0.51449106    |
| ILMN_1766182 | GNAZ      | 0.514469141   |
| ILMN_1746492 | HTZ7      | 0.51430817    |
| ILMN_3201480 | RPS27A    | 0.514238567   |
| ILMN_1809813 | PGF       | 0.514146835   |
| ILMN_2043816 | ARPC5L    | 0.514134012   |
| ILMN_1755224 | TMEM102   | 0.513871217   |
| ILMN_1698726 | SLC25A27  | 0.513761258   |
| ILMN_1679640 | FRIL      | 0.5137325     |
| ILMN_1749006 | RCS01     | 0.513694652   |
| ILMN_2134224 | ATP13A1   | 0.513677438   |
| ILMN_1673960 | MAT2B     | 0.513622122   |
| ILMN_1722218 | MBOAT7    | 0.513619405   |
| ILMN_2373106 | DMD       | 0.513547525   |
| ILMN_1725542 | POLR2B    | 0.513539834   |
| ILMN_2375651 | SCN1M1    | 0.513397569   |
| ILMN_1764754 | RAMP1     | 0.513390142   |
| ILMN_2310075 | TRMT2A    | 0.513358553   |
| ILMN_1669409 | VSIG4     | 0.513316669   |
| ILMN_1684217 | AURKB     | 0.513295558   |
| ILMN_1788074 | PCID2     | 0.513117608   |
| ILMN_2196550 | CL3orf118 | 0.513066132   |
| ILMN_1681984 | GALNT10   | 0.513048289   |
| ILMN_1656540 | RUVBL1    | 0.51303256    |
| ILMN_1666594 | IRF8      | 0.512999316   |
| ILMN_1674748 | CXB       | 0.512932129   |
| ILMN_2331087 | MS4A7     | 0.512883366   |
| ILMN_1663787 | KLK3      | 0.512871084   |
| ILMN_2342068 | ELKS      | 0.51278549    |
| ILMN_1815169 | MCM5      | 0.512784901   |
| ILMN_1727036 | ENAH      | 0.512607531   |
| ILMN_2364110 | GGA       | 0.512595309   |
| ILMN_1809963 | ESAD1     | 0.512484373   |
| ILMN_1667453 | HINFP     | 0.512470356   |
| ILMN_2135258 | RAPGEF3   | 0.512335503   |
| ILMN_1662949 | FAM132A   | 0.512293164   |
| ILMN_2288802 | SEC14L1   | 0.512216184   |
| ILMN_1806897 | HRD1      | 0.512063184   |
| ILMN_1712184 | HST1H3C   | 0.511939633   |
| ILMN_1676091 | HNRNPAL1  | 0.51187527    |
| ILMN_1766955 | VCAM1     | 0.511860488   |
| ILMN_2122374 | FAM49B    | 0.511851275   |
| ILMN_3278995 | RBM39     | 0.511846671   |
| ILMN_2138049 | PEX26     | 0.511700246   |
| ILMN_1681101 | MARCH1    | 0.511686062   |
| ILMN_1651828 | CCT3      | 0.511652173   |
| ILMN_1707627 | TPH1      | 0.511589391   |
| ILMN_2188451 | HST1H2AH  | 0.511554701   |
| ILMN_2366463 | FN1       | 0.511537963   |
| ILMN_1791483 | PTGAD     | 0.511465917   |
| ILMN_1665832 | ID1       | 0.511384581   |
| ILMN_1844408 | PLXNA2    | 0.511376894   |
| ILMN_1796085 | PPM1B     | 0.511344389   |
| ILMN_1701455 | FBX06     | 0.511299633   |
| ILMN_2195462 | CLIQNF4   | 0.511298456   |
| ILMN_2397553 | PSMA3     | 0.511284053   |
| ILMN_1714216 | TSC2      | 0.511160984   |
| ILMN_2343618 | SAMD3     | 0.511113817   |
| ILMN_1774813 | GPR173    | 0.5110492     |
| ILMN_1740903 | C7orf49   | 0.510999889   |
| ILMN_1738424 | CCDC4     | 0.510917045   |
| ILMN_1712636 | NVL       | 0.510906519   |
| ILMN_1747824 | ZNF85     | 0.510716995   |
| ILMN_2388070 | TMEM44    | 0.510682026   |
| ILMN_1670272 | LRP10     | 0.510642807   |
| ILMN_2082314 | TOM1      | 0.510474377   |
| ILMN_1713450 | MYI6B     | 0.510430533   |
| ILMN_2403965 | TNPOCS    | 0.510339825   |
| ILMN_1809730 | RVRG      | 0.51032854    |
| ILMN_2352380 | TRPM2     | 0.510267787   |
| ILMN_1775566 | ATP1A1    | 0.510254368   |
| ILMN_3249618 | NOP10     | 0.510162063   |
| ILMN_1726064 | PAK1BP1   | 0.510027814   |
| ILMN_1775073 | ZNF73     | 0.509974732   |
| ILMN_1733930 | PREB      | 0.509962537   |
| ILMN_1716480 | ACD       | 0.50995037    |
| ILMN_2294978 | ANG       | 0.509856649   |
| ILMN_1661733 | FOLR1     | 0.509821831   |
| ILMN_1722537 | FLJ4508   | 0.509692025   |
| ILMN_1784884 | LILRB3    | 0.509625418   |
| ILMN_1690268 | HNRNPUL1  | 0.50961352    |
| ILMN_1669788 | NUDT14    | 0.509565282   |
| ILMN_1668582 | CRBN      | 0.50948951    |
| ILMN_1661599 | DOT1A     | 0.509469343   |
| ILMN_1781565 | MEDC1     | 0.509288115   |
| ILMN_1730421 | CHAC1     | 0.509212881   |

|              |                |              |
|--------------|----------------|--------------|
| ILMN_3246556 | LOC100133308   | -0.562182677 |
| ILMN_1816157 | BG911604       | -0.56218268  |
| ILMN_2252535 | CRBN           | -0.562273022 |
| ILMN_1743853 | AK128837       | -0.562312018 |
| ILMN_1678186 | ATPEVOA4       | -0.562442534 |
| ILMN_1724040 | ANKRD57        | -0.562481622 |
| ILMN_3237812 | REXO1L1        | -0.562506093 |
| ILMN_1686992 | TEDEM1         | -0.56255987  |
| ILMN_328358  | SCARN22        | -0.56256308  |
| ILMN_1772957 | FOXPED2        | -0.562570466 |
| ILMN_2413732 | ADAMTS13       | -0.562584955 |
| ILMN_2299072 | LUC7L3         | -0.562688483 |
| ILMN_1718671 | GJB6           | -0.562723291 |
| ILMN_2269193 | ZNF331         | -0.562762781 |
| ILMN_3269577 | FLM00278       | -0.562775518 |
| ILMN_1793514 | RPTOR          | -0.562794898 |
| ILMN_2048647 | NBEA           | -0.562863411 |
| ILMN_1873592 | NA             | -0.562937959 |
| ILMN_3195563 | NA             | -0.562969611 |
| ILMN_1738654 | Cxor40B        | -0.563045719 |
| ILMN_3256242 | RPS29          | -0.563081252 |
| ILMN_1669259 | ANKRD49        | -0.56307675  |
| ILMN_1762142 | CDC47          | -0.563182098 |
| ILMN_3297880 | SEC13          | -0.563250308 |
| ILMN_1795919 | SCAND2         | -0.563384142 |
| ILMN_1739154 | LSAMP          | -0.563443034 |
| ILMN_2122026 | VN1P2          | -0.563530078 |
| ILMN_1651453 | LOC643596      | -0.563563737 |
| ILMN_1794011 | CHST2          | -0.563579377 |
| ILMN_1724544 | PPP4R1         | -0.563586409 |
| ILMN_1662801 | ZMYM3          | -0.563758273 |
| ILMN_1704043 | PRR21          | -0.563783785 |
| ILMN_3285346 | LOC64387       | -0.563811221 |
| ILMN_1660166 | FAM188B2       | -0.564306449 |
| ILMN_1790249 | F8A1           | -0.564381259 |
| ILMN_3239288 | ISM1           | -0.564446345 |
| ILMN_1842468 | BX103636       | -0.564455292 |
| ILMN_1707435 | DHNA5          | -0.564518518 |
| ILMN_2349982 | FGF1           | -0.564660881 |
| ILMN_2115862 | ESPNL          | -0.564789836 |
| ILMN_3241182 | DFXZp686K04236 | -0.564803122 |
| ILMN_3273185 | AK311113       | -0.564852012 |
| ILMN_2364305 | FECH           | -0.564905595 |
| ILMN_1758215 | ANKRD34C       | -0.564980993 |
| ILMN_2113880 | ZCCHC10        | -0.565019892 |
| ILMN_1727049 | SLC29A4        | -0.565203721 |
| ILMN_1684168 | GST21          | -0.565218116 |
| ILMN_1795419 | CNPPD1         | -0.565473461 |
| ILMN_3259374 | STGAL2         | -0.565703159 |
| ILMN_3260885 | TNFRSF14       | -0.565836171 |
| ILMN_1702489 | TRMG3          | -0.565850949 |
| ILMN_1693905 | HAT1           | -0.56602534  |
| ILMN_1748694 | NHSL2          | -0.566165118 |
| ILMN_1758189 | OR4F17         | -0.566175707 |
| ILMN_1876266 | GIA3           | -0.566248782 |
| ILMN_3048986 | CL1orf20       | -0.566274429 |
| ILMN_1773200 | CP110          | -0.566273667 |
| ILMN_3287871 | LOC100505502   | -0.566284456 |
| ILMN_3215268 | ABC810         | -0.566424923 |
| ILMN_2194229 | TMEM128        | -0.566445657 |
| ILMN_1742813 | TMEM167A       | -0.566565009 |
| ILMN_1877317 | AVP29A700      | -0.566619948 |
| ILMN_1692056 | H3S3T3A1       | -0.566620203 |
| ILMN_2171783 | CPEB3          | -0.56671523  |
| ILMN_3289997 | AATK           | -0.566757675 |
| ILMN_1795552 | UNC13C         | -0.566774398 |
| ILMN_2290896 | truncated AKR  | -0.566838118 |
| ILMN_2056932 | SPEM1          | -0.56685123  |
| ILMN_1766115 | PLEKHF2        | -0.566903782 |
| ILMN_1711650 | KCNE1L         | -0.566978869 |
| ILMN_1681855 | TBC1D25        | -0.566984457 |
| ILMN_1770260 | NFKB2          | -0.567037151 |
| ILMN_1698007 | MLL2           | -0.567047652 |
| ILMN_3294196 | LOC400743      | -0.567141072 |
| ILMN_1685396 | CLIC5          | -0.567171906 |
| ILMN_1776260 | PPALAA         | -0.567360874 |
| ILMN_1779633 | PSMD6          | -0.567384356 |
| ILMN_1813270 | ELF5           | -0.567469887 |
| ILMN_3207933 | ABCE1          | -0.567545875 |
| ILMN_1731688 | KIF            | -0.567575209 |
| ILMN_1770911 | NRSN2          | -0.567606424 |
| ILMN_1796836 | AX747367       | -0.567667436 |
| ILMN_1784985 | PRT3           | -0.567754825 |
| ILMN_3307767 | WNT9A          | -0.567765103 |
| ILMN_1675822 | PCDH9B         | -0.567789787 |
| ILMN_1712298 | ANKRD46        | -0.567817533 |
| ILMN_1671404 | SVIL           | -0.567890213 |
| ILMN_1802223 | ATP2B2         | -0.567951258 |
| ILMN_1728074 | PHAX           | -0.567954097 |
| ILMN_3177354 | LOC100128842   | -0.568002674 |
| ILMN_1675542 | NUS1           | -0.568016062 |
| ILMN_1861916 | CRN92331       | -0.56818175  |
| ILMN_1691395 | ZBTB11         | -0.56818739  |
| ILMN_1745988 | NUDT12         | -0.568221175 |
| ILMN_1780174 | MCC1           | -0.568288104 |
| ILMN_2131103 | PPP1R3B        | -0.568413387 |
| ILMN_3043084 | AID1366        | -0.568437821 |
| ILMN_1804834 | C6orf130       | -0.568514712 |

|              |              |             |
|--------------|--------------|-------------|
| ILMN_1687922 | RP9          | 0.509210825 |
| ILMN_2320906 | RTN3         | 0.509092778 |
| ILMN_2144791 | GOLGAGA      | 0.509077285 |
| ILMN_2320732 | LOC100129637 | 0.509075464 |
| ILMN_1664419 | KRTAP8-1     | 0.508971909 |
| ILMN_1777301 | ARL13B       | 0.508971054 |
| ILMN_1774602 | FBLN2        | 0.508938007 |
| ILMN_1691156 | MT1A         | 0.508842263 |
| ILMN_1653337 | USP12        | 0.508832779 |
| ILMN_1701930 | EF1B2        | 0.508817094 |
| ILMN_2407954 | XCR1         | 0.508761381 |
| ILMN_2378708 | TAF6         | 0.508712657 |
| ILMN_1681160 | CCT6P1       | 0.508607641 |
| ILMN_3197549 | TMEM106A     | 0.508563308 |
| ILMN_1678143 | ARHGD8B      | 0.508524063 |
| ILMN_1662963 | PSD2         | 0.508388305 |
| ILMN_2335198 | NCOA1        | 0.508377723 |
| ILMN_2106167 | RAP1GDS1     | 0.508333875 |
| ILMN_3276859 | LOC401127    | 0.508316162 |
| ILMN_1664823 | TADK3        | 0.508254565 |
| ILMN_2376535 | CAS2L1       | 0.508241611 |
| ILMN_2174743 | CIDEF        | 0.508203238 |
| ILMN_1779558 | GAS6         | 0.508109139 |
| ILMN_1799208 | CSGALNACT2   | 0.508108201 |
| ILMN_2154566 | RPL10A       | 0.508022312 |
| ILMN_2412281 | PDLIM5       | 0.508011491 |
| ILMN_2395169 | THOC5        | 0.507974631 |
| ILMN_2378868 | SRSF5        | 0.507970845 |
| ILMN_1701581 | LAD1         | 0.507957793 |
| ILMN_1656837 | RBP1         | 0.507921075 |
| ILMN_1772148 | SULT1C4      | 0.507876533 |
| ILMN_1815039 | RBP36        | 0.507770772 |
| ILMN_2140785 | GDF1         | 0.507715969 |
| ILMN_1652805 | MPHOSPH10    | 0.507569166 |
| ILMN_1679268 | PEL1         | 0.507289641 |
| ILMN_1720430 | PPDFP        | 0.507183442 |
| ILMN_1806023 | JUN          | 0.507105499 |
| ILMN_1760741 | NDUF9A       | 0.507058528 |
| ILMN_2368585 | GGT1         | 0.507022566 |
| ILMN_1684530 | SNX18        | 0.50695708  |
| ILMN_2406313 | RBCK1        | 0.506937607 |
| ILMN_1751598 | SESN2        | 0.506861921 |
| ILMN_3232529 | LOC375133    | 0.506807656 |
| ILMN_2266471 | SNRPC        | 0.506759333 |
| ILMN_1687738 | RPL7         | 0.506613586 |
| ILMN_1794386 | IL2RG        | 0.506517299 |
| ILMN_1724250 | GRN          | 0.506471886 |
| ILMN_1700477 | MIRPL43      | 0.506469176 |
| ILMN_1658685 | ELFN2        | 0.506420275 |
| ILMN_1805623 | SRCR41       | 0.506070431 |
| ILMN_1801927 | FIGLA        | 0.50605141  |
| ILMN_1760628 | C9orf86      | 0.505973952 |
| ILMN_1669878 | GUS8         | 0.505885246 |
| ILMN_1678619 | DAK          | 0.50588648  |
| ILMN_1782506 | CD86         | 0.505847378 |
| ILMN_1769383 | GIMAP5       | 0.505846266 |
| ILMN_2057566 | PCP          | 0.505782838 |
| ILMN_3297141 | BC047484     | 0.505772202 |
| ILMN_1663158 | ZNF174       | 0.505727086 |
| ILMN_1794976 | NUDT4        | 0.505653381 |
| ILMN_1715625 | CD0orf94     | 0.505611845 |
| ILMN_1730794 | AKA4         | 0.505551278 |
| ILMN_2273131 | CDC46        | 0.505517289 |
| ILMN_1653200 | SLC22A17     | 0.505440908 |
| ILMN_1803838 | CNFN         | 0.505359421 |
| ILMN_2306077 | USP33        | 0.505340647 |
| ILMN_1761181 | NO19         | 0.505326343 |
| ILMN_1668559 | RSS10        | 0.505213411 |
| ILMN_1699348 | M54A4E       | 0.505211366 |
| ILMN_2181191 | TPH1         | 0.505174358 |
| ILMN_1738718 | CYB561D2     | 0.505115735 |
| ILMN_2094061 | IMP2A        | 0.505030249 |
| ILMN_2223941 | FBLN5        | 0.504909468 |
| ILMN_2421738 | ZFP62        | 0.504760366 |
| ILMN_1742782 | GPANK1       | 0.504681949 |
| ILMN_1721022 | SHC1         | 0.504568447 |
| ILMN_1759084 | INTS8        | 0.504427434 |
| ILMN_1746252 | POLD2        | 0.504351296 |
| ILMN_1769259 | ANQ9         | 0.504240042 |
| ILMN_1721024 | SFRP91       | 0.504203338 |
| ILMN_1799099 | TEXT3        | 0.50417676  |
| ILMN_1756093 | TCEAL4       | 0.504173606 |
| ILMN_2251961 | PCDHGC3      | 0.504151971 |
| ILMN_1708890 | RASSF4       | 0.504013832 |
| ILMN_1781468 | SMAD9        | 0.50398267  |
| ILMN_1682036 | BRWD1-IT2    | 0.503873495 |
| ILMN_1911059 | AV691356     | 0.503856519 |
| ILMN_1810584 | IL1R1        | 0.503846364 |
| ILMN_1761772 | NUP155       | 0.503788957 |
| ILMN_1821787 | HERC2        | 0.503778804 |
| ILMN_1792489 | ADPC2        | 0.503705551 |
| ILMN_1665761 | BCL11B       | 0.503722886 |
| ILMN_1713686 | IL34         | 0.503677424 |
| ILMN_1746763 | ECM2         | 0.503641187 |
| ILMN_1751571 | RAD23A       | 0.503630739 |
| ILMN_1713249 | PHF19        | 0.50362596  |
| ILMN_2092516 | GPR94C       | 0.503515795 |
| ILMN_1719403 | MTXL1        | 0.503440523 |

|              |              |               |
|--------------|--------------|---------------|
| ILMN_1651228 | RP528        | -0.568515995  |
| ILMN_1778788 | AMOTL2       | -0.568522012  |
| ILMN_3249566 | LOC100130264 | -0.568573117  |
| ILMN_1724658 | RNP9         | -0.568078863  |
| ILMN_1668353 | C22orf45     | -0.568754043  |
| ILMN_2076602 | ITM2A        | -0.568757698  |
| ILMN_1765620 | VSTM2A       | -0.568795511  |
| ILMN_1807556 | VWA3A        | -0.568852002  |
| ILMN_2672541 | RAB11FP2     | -0.5688717    |
| ILMN_1672947 | CAST         | -0.56881489   |
| ILMN_1859942 | BG201242     | -0.568881633  |
| ILMN_1880864 | BX102511     | -0.56899028   |
| ILMN_1661399 | ARL4A        | -0.569025019  |
| ILMN_1699082 | MAPKAPK5     | -0.569041689  |
| ILMN_3245346 | EFR3B        | -0.56913921   |
| ILMN_1789505 | ITPR1        | -0.569281204  |
| ILMN_3250322 | DPPA3        | -0.569337404  |
| ILMN_3241282 | TDRD12       | -0.56937105   |
| ILMN_1753885 | YTHDF1       | -0.56945784   |
| ILMN_1715125 | HAO          | -0.569514933  |
| ILMN_1682126 | LOC100133920 | -0.569551598  |
| ILMN_1788625 | EXOC5        | -0.569671807  |
| ILMN_2276000 | CPE1         | -0.56967776   |
| ILMN_1691104 | PGAM4        | -0.56972259   |
| ILMN_2168747 | GSTA2        | -0.56977431   |
| ILMN_1770927 | KAZN         | -0.569867463  |
| ILMN_1736512 | SEH1A1A      | -0.569981164  |
| ILMN_1869087 | AKO96119     | -0.570022137  |
| ILMN_3262909 | C6orf176     | -0.570056697  |
| ILMN_3239298 | OTUD7B       | -0.570086742  |
| ILMN_1662617 | PPP2R3C      | -0.570117165  |
| ILMN_1753773 | ANAPC11      | -0.570203923  |
| ILMN_1653812 | KCTD9        | -0.57021895   |
| ILMN_1808220 | LCE3E        | -0.570231051  |
| ILMN_1705144 | ULK1         | -0.570332017  |
| ILMN_1716309 | EGFL6        | -0.570365554  |
| ILMN_3245869 | C3orf78      | -0.570424614  |
| ILMN_1692443 | RECQL5       | -0.570435335  |
| ILMN_1770853 | CHST5        | -0.570526709  |
| ILMN_2182348 | SMC3         | -0.570683623  |
| ILMN_3249676 | BOLA2B       | -0.570788213  |
| ILMN_1906579 | AIZ74046     | -0.570929393  |
| ILMN_1750722 | RP57         | -0.570940252  |
| ILMN_1680636 | WWOX         | -0.571067846  |
| ILMN_1804051 | SNHG         | -0.5711212012 |
| ILMN_3292042 | LOC284688    | -0.571213886  |
| ILMN_1665982 | AKTIP        | -0.571288545  |
| ILMN_2398926 | C17orf58     | -0.571319227  |
| ILMN_1750508 | STMN1        | -0.571422366  |
| ILMN_1679322 | UNC93B8      | -0.571432504  |
| ILMN_1800447 | PHF8         | -0.571493293  |
| ILMN_1656846 | NA           | -0.571540266  |
| ILMN_1752222 | C9orf82      | -0.571580868  |
| ILMN_2276461 | MAP2         | -0.571592627  |
| ILMN_2400326 | DYRK3        | -0.571832382  |
| ILMN_1714176 | C13orf29     | -0.571865428  |
| ILMN_1660698 | GTPBP8       | -0.571917067  |
| ILMN_1666310 | BSX          | -0.571980472  |
| ILMN_2289825 | ARPP21       | -0.572070359  |
| ILMN_1787919 | PARVB        | -0.572082675  |
| ILMN_1779470 | ABCG4        | -0.572110928  |
| ILMN_1684221 | CY5B         | -0.572217305  |
| ILMN_1685779 | FOXR1        | -0.572334122  |
| ILMN_2153061 | FGF20        | -0.572344783  |
| ILMN_1785345 | GPR84        | -0.57255701   |
| ILMN_2306066 | FUS          | -0.57272082   |
| ILMN_1677866 | FOLH1B       | -0.572734415  |
| ILMN_2308177 | SPATA7       | -0.572829704  |
| ILMN_1765532 | RDBP         | -0.572880007  |
| ILMN_1689097 | NAA20        | -0.572886324  |
| ILMN_1814296 | TRPM6        | -0.572900335  |
| ILMN_3236052 | SNORD198     | -0.573051861  |
| ILMN_1801008 | KCNK3        | -0.573109277  |
| ILMN_1615707 | CALML4       | -0.573268478  |
| ILMN_2225577 | POCS         | -0.573417704  |
| ILMN_1802669 | PPP3CB       | -0.573436814  |
| ILMN_2103761 | TLE4         | -0.573440651  |
| ILMN_1906948 | A8884386     | -0.573521229  |
| ILMN_1787705 | ATPV1B2      | -0.573628745  |
| ILMN_1768590 | SCOC         | -0.573652756  |
| ILMN_2407308 | HEY1         | -0.573664076  |
| ILMN_1790645 | HECW1        | -0.573751139  |
| ILMN_1670752 | KIAA0907     | -0.573767314  |
| ILMN_1888252 | A984350      | -0.57385942   |
| ILMN_1712836 | C6orf27      | -0.573889788  |
| ILMN_1745368 | TMEM50A      | -0.57391777   |
| ILMN_1719599 | SYTL4        | -0.574031032  |
| ILMN_1658917 | SLC1A1       | -0.574035296  |
| ILMN_2350970 | SOCS5        | -0.5740635    |
| ILMN_3305768 | GSTA7P       | -0.574065199  |
| ILMN_1740610 | PCATK        | -0.5741416328 |
| ILMN_1694630 | AKO5082      | -0.574227201  |
| ILMN_1878795 | AW297854     | -0.574359263  |
| ILMN_1741970 | JUP          | -0.574370326  |
| ILMN_1784556 | H2AFB2       | -0.574371374  |
| ILMN_1708627 | SRP9         | -0.574467633  |
| ILMN_1737805 | FRK          | -0.574565547  |
| ILMN_1818757 | AKTIP        | -0.574611028  |



|              |              |             |
|--------------|--------------|-------------|
| ILMN_1690139 | KIAA0748     | 0.503240447 |
| ILMN_1736752 | COMT1        | 0.503133222 |
| ILMN_3188655 | LOC100128239 | 0.503108163 |
| ILMN_1795826 | ATPB001      | 0.502952492 |
| ILMN_1698195 | GNR5         | 0.502910287 |
| ILMN_1733841 | TCF7L1       | 0.502898328 |
| ILMN_1737341 | GOLGAS       | 0.502767864 |
| ILMN_1695025 | CD2          | 0.50275335  |
| ILMN_1688637 | TMEM198      | 0.502661543 |
| ILMN_1657591 | SCN1A        | 0.502640147 |
| ILMN_2338733 | ART5         | 0.502575532 |
| ILMN_3307796 | IKZF5        | 0.502469435 |
| ILMN_1869442 | CR743578     | 0.502467707 |
| ILMN_1742260 | SSFA2        | 0.502366255 |
| ILMN_1752914 | ARHGAP31     | 0.502230709 |
| ILMN_3340328 | PTHR1        | 0.50221784  |
| ILMN_212870  | CDR2L        | 0.502086768 |
| ILMN_1779324 | GZMA         | 0.502071448 |
| ILMN_1657373 | LEPRELL      | 0.501885374 |
| ILMN_1813573 | SETD1B       | 0.50187855  |
| ILMN_1467295 | VASN         | 0.50185333  |
| ILMN_1692260 | MAFG         | 0.50177965  |
| ILMN_2317730 | ELMO2        | 0.501684108 |
| ILMN_1699574 | NRP1         | 0.50167323  |
| ILMN_1652472 | BRAF         | 0.501654005 |
| ILMN_1687888 | BTNA1        | 0.50154188  |
| ILMN_1775373 | HST1D10F     | 0.501522357 |
| ILMN_1832656 | AWS78902     | 0.501320288 |
| ILMN_1672975 | NA           | 0.501293498 |
| ILMN_1786215 | ZNF3         | 0.501292576 |
| ILMN_1728714 | SSSCA1       | 0.501214556 |
| ILMN_1807609 | SPTBN5       | 0.501062229 |
| ILMN_1713031 | PCP9         | 0.501050116 |
| ILMN_1765923 | C17orf101    | 0.501024521 |
| ILMN_3221190 | RPL7L1       | 0.501013992 |
| ILMN_1711361 | ZNF319       | 0.500940835 |
| ILMN_1757343 | PABPC4       | 0.50089152  |
| ILMN_1725311 | GCGF         | 0.500863863 |
| ILMN_1668465 | KIAA1009     | 0.500773885 |
| ILMN_1758418 | TNFSF13B     | 0.500716068 |
| ILMN_1661886 | APEX1        | 0.50066672  |
| ILMN_1663816 | CCDC148      | 0.50051007  |
| ILMN_2406299 | SEMA3B       | 0.500440212 |
| ILMN_1708787 | ZNF427       | 0.500409489 |
| ILMN_1664323 | GLE1         | 0.500368885 |
| ILMN_2059505 | ARPP19       | 0.50030415  |
| ILMN_1805410 | C15orf48     | 0.500292957 |
| ILMN_1654566 | HSPAL1       | 0.500226651 |
| ILMN_1788250 | LDCC1        | 0.500126154 |
| ILMN_1675988 | ARHGEP7      | 0.50012292  |
| ILMN_2246111 | KXKB7        | 0.499959206 |
| ILMN_1672496 | DNAI1A1      | 0.499938471 |
| ILMN_1669310 | RHOT2        | 0.499796796 |
| ILMN_1699520 | SLC8A1       | 0.499701513 |
| ILMN_2388142 | CD99L2       | 0.499566769 |
| ILMN_2396427 | RLT4         | 0.499544211 |
| ILMN_1723004 | CD72         | 0.499532989 |
| ILMN_1781824 | FASLG        | 0.499494548 |
| ILMN_1776021 | EIF4H        | 0.499431478 |
| ILMN_3230286 | BCLAF1       | 0.499425012 |
| ILMN_3244960 | NACC1        | 0.499419937 |
| ILMN_2358560 | TIAH2        | 0.499323276 |
| ILMN_1729980 | RNF216       | 0.499318788 |
| ILMN_1808196 | GSTO1        | 0.49922463  |
| ILMN_1738530 | ATAD3A       | 0.499039779 |
| ILMN_1665696 | EFNA4        | 0.499011758 |
| ILMN_1809751 | EIF2C3       | 0.499011608 |
| ILMN_1662263 | HDP1         | 0.498886632 |
| ILMN_1676924 | CD247        | 0.498844042 |
| ILMN_1722718 | BMP2         | 0.498835671 |
| ILMN_1784178 | IFT172       | 0.498821246 |
| ILMN_1662232 | DCTN2        | 0.498815683 |
| ILMN_2277419 | SLC38A10     | 0.498813353 |
| ILMN_2375319 | RASGEF2      | 0.498792111 |
| ILMN_1665203 | SUMO4        | 0.498755545 |
| ILMN_2318733 | BNIP1        | 0.498681509 |
| ILMN_1678087 | MAP3K4       | 0.498643115 |
| ILMN_1703041 | IDUA         | 0.498572977 |
| ILMN_1658469 | P53T01       | 0.498550688 |
| ILMN_1703132 | LYRA2        | 0.498517305 |
| ILMN_1785988 | CNSN1A1      | 0.498474825 |
| ILMN_1761309 | ADCK5        | 0.498307104 |
| ILMN_2319766 | RUFY2        | 0.49830362  |
| ILMN_1740197 | ZNF234       | 0.498293974 |
| ILMN_1797360 | GUGIC4C      | 0.498240163 |
| ILMN_1763147 | NDUF86       | 0.498065493 |
| ILMN_1711823 | C17orf70     | 0.498050586 |
| ILMN_2381841 | DDX198       | 0.498025514 |
| ILMN_1762281 | DCTN3        | 0.498022824 |
| ILMN_1815287 | B3GALNT1     | 0.497960952 |
| ILMN_2320249 | DACE1        | 0.497930736 |
| ILMN_1789001 | SLC15B2      | 0.497574476 |
| ILMN_2316236 | HOPX         | 0.497570437 |
| ILMN_1742544 | MEF2C        | 0.497490332 |
| ILMN_2371055 | EFNA1        | 0.49747535  |
| ILMN_1795383 | RPUSD3       | 0.497455604 |
| ILMN_1697377 | ANKRD30B     | 0.497431751 |
| ILMN_1740172 | CCDC48       | 0.497401721 |

|              |              |              |
|--------------|--------------|--------------|
| ILMN_1740855 | TCPI02       | -0.574685242 |
| ILMN_1710170 | PPAP2C       | -0.574695563 |
| ILMN_1722609 | PM2001       | -0.574741293 |
| ILMN_2396474 | RAP1B        | -0.574816701 |
| ILMN_1710128 | FAM66B       | -0.574872085 |
| ILMN_3200465 | LOC100132724 | -0.574940853 |
| ILMN_2341626 | MARCB8       | -0.574959336 |
| ILMN_1836936 | BM684558     | -0.575061049 |
| ILMN_2394649 | TADA1        | -0.575144481 |
| ILMN_1740355 | COL9A3       | -0.575177835 |
| ILMN_1912737 | HPK2         | -0.575275402 |
| ILMN_3221228 | FLJ3786      | -0.575343166 |
| ILMN_1703459 | WNT9B        | -0.575453489 |
| ILMN_1664592 | C1orf95      | -0.575511516 |
| ILMN_1775442 | SPDIE7P      | -0.575542251 |
| ILMN_2326324 | LDHC         | -0.575693103 |
| ILMN_3193796 | LOC100132024 | -0.575697308 |
| ILMN_1859393 | AIZ03701     | -0.575712126 |
| ILMN_1739275 | HTR3C        | -0.575716752 |
| ILMN_1766270 | OR51M1       | -0.575736077 |
| ILMN_1683555 | LOC105056579 | -0.575740565 |
| ILMN_1812970 | RWD01        | -0.575836542 |
| ILMN_2183891 | PEX5L        | -0.575839481 |
| ILMN_1846543 | BFS12941     | -0.575842211 |
| ILMN_1800951 | ATXN1        | -0.575875973 |
| ILMN_1688111 | MGC34800     | -0.575943291 |
| ILMN_2401730 | C16orf11C1   | -0.575952777 |
| ILMN_1695355 | FOXP2        | -0.576172423 |
| ILMN_1727361 | LEM03        | -0.576363675 |
| ILMN_3255124 | ATL1         | -0.57638784  |
| ILMN_1806330 | C17orf78     | -0.576554627 |
| ILMN_2029163 | CHD6         | -0.576558534 |
| ILMN_1731337 | DNAI1        | -0.576564985 |
| ILMN_1740450 | DLGAP1       | -0.576615856 |
| ILMN_1669931 | TM9SF3       | -0.576666187 |
| ILMN_221672  | DISC1        | -0.576674859 |
| ILMN_1887357 | AKO95715     | -0.576676598 |
| ILMN_2276397 | RASGRP2      | -0.57670015  |
| ILMN_1810942 | CYP3A5       | -0.576736739 |
| ILMN_1699778 | NOXRA2       | -0.576771239 |
| ILMN_1705261 | CAPN1        | -0.576864816 |
| ILMN_2327212 | MYO10        | -0.576930623 |
| ILMN_1771800 | PRACA        | -0.576942753 |
| ILMN_1775138 | PEG3         | -0.576981937 |
| ILMN_3245464 | NCRM5        | -0.577038118 |
| ILMN_3248207 | NA           | -0.577094681 |
| ILMN_1784176 | ABCAS        | -0.577236831 |
| ILMN_2117902 | FPAAP1       | -0.57731466  |
| ILMN_3290715 | COL6A4P2     | -0.577331196 |
| ILMN_2198320 | FEM1C        | -0.577489977 |
| ILMN_1667930 | HSBP1        | -0.577544869 |
| ILMN_2189371 | NTNG1        | -0.577555251 |
| ILMN_2292646 | GAD1         | -0.577648872 |
| ILMN_1750800 | ACD1         | -0.577656143 |
| ILMN_1653092 | FAM186A      | -0.577704845 |
| ILMN_2127624 | UBE2CBP      | -0.57773962  |
| ILMN_2061446 | NCHI1        | -0.577868866 |
| ILMN_1727205 | ARHGEP10L    | -0.577815437 |
| ILMN_1714567 | AHNAK        | -0.57796211  |
| ILMN_2394571 | FBXW11       | -0.578272069 |
| ILMN_2193498 | TRMT1L       | -0.578451215 |
| ILMN_1754864 | SLC35A10     | -0.578465179 |
| ILMN_1675721 | UBE2R2       | -0.578573819 |
| ILMN_1696622 | SLC38A6      | -0.578580701 |
| ILMN_1778464 | TRAPPIC10    | -0.578609288 |
| ILMN_1653347 | BCO12881     | -0.57866475  |
| ILMN_1756125 | H1FNT        | -0.578787229 |
| ILMN_3259829 | UBN2B        | -0.578844669 |
| ILMN_1685168 | RFY4         | -0.578867478 |
| ILMN_3236801 | NA           | -0.578886823 |
| ILMN_3247438 | C19orf69     | -0.578945018 |
| ILMN_1758907 | UGT1A1       | -0.579036987 |
| ILMN_1685572 | MAGEB6       | -0.579043925 |
| ILMN_1678946 | PEL1B        | -0.579050977 |
| ILMN_1724372 | SIRT3        | -0.579111646 |
| ILMN_1782110 | ZNF295       | -0.579486367 |
| ILMN_1868037 | CA41597      | -0.579533156 |
| ILMN_1779370 | ARHGEP9      | -0.579593732 |
| ILMN_1706784 | H2AFV        | -0.579710472 |
| ILMN_1681886 | ADAMT55      | -0.579760828 |
| ILMN_2292592 | PCSK6        | -0.579809584 |
| ILMN_2332440 | KCNMB2       | -0.579890427 |
| ILMN_2380566 | SIAM1        | -0.579952848 |
| ILMN_1664776 | EP3A         | -0.580063908 |
| ILMN_1754864 | AD231061     | -0.580108660 |
| ILMN_3245084 | AK127966     | -0.580237234 |
| ILMN_1800874 | MRO          | -0.580271586 |
| ILMN_2075829 | LMBRD2       | -0.580284656 |
| ILMN_1781320 | SLMAP        | -0.580287365 |
| ILMN_2079488 | GNPDA2       | -0.580406638 |
| ILMN_1793889 | PRGAA1       | -0.58047544  |
| ILMN_1844074 | EX107348     | -0.580570996 |
| ILMN_1686951 | TM6SF2       | -0.580719141 |
| ILMN_2372124 | HNF4A        | -0.580828089 |
| ILMN_2323418 | KRIT1        | -0.580878381 |
| ILMN_1735052 | ULK1         | -0.580881583 |
| ILMN_1696568 | ATP2C1       | -0.580890367 |
| ILMN_2279484 | C2orf88      | -0.580977701 |

|              |              |             |
|--------------|--------------|-------------|
| ILMN_2397294 | PLC84        | 0.497384523 |
| ILMN_1703989 | ARFRP1       | 0.497306492 |
| ILMN_1682775 | EDN1         | 0.497161882 |
| ILMN_1719244 | NRB23        | 0.497145693 |
| ILMN_1713058 | PS1RP2       | 0.497000557 |
| ILMN_2244009 | LBH          | 0.49688655  |
| ILMN_1760314 | CCDC8        | 0.496822759 |
| ILMN_1809883 | CCDC134      | 0.496818877 |
| ILMN_1696099 | ALDHA1       | 0.496744102 |
| ILMN_1724959 | SEC11A       | 0.496694773 |
| ILMN_1712112 | RCAN1        | 0.496583416 |
| ILMN_2302947 | CSF1         | 0.496397735 |
| ILMN_1751559 | TMEM204      | 0.496358751 |
| ILMN_1662658 | PUS1         | 0.496290191 |
| ILMN_1711186 | WRAP73       | 0.49627249  |
| ILMN_1669667 | POU2F1       | 0.495985798 |
| ILMN_1701243 | C10orf2      | 0.495938357 |
| ILMN_2112638 | SVEP1        | 0.495681127 |
| ILMN_1801105 | PRKCD        | 0.495654909 |
| ILMN_3234116 | CCDC72       | 0.495548099 |
| ILMN_1662681 | AMBR1        | 0.495539279 |
| ILMN_1703005 | EJF3F        | 0.49520632  |
| ILMN_1684964 | ZNF212       | 0.495190575 |
| ILMN_2372136 | PAH1M        | 0.495162542 |
| ILMN_1701629 | AK127589     | 0.495028628 |
| ILMN_1686579 | ATP2B4       | 0.494956304 |
| ILMN_2191313 | FAM21A       | 0.494936756 |
| ILMN_3284053 | LOC100335030 | 0.494920309 |
| ILMN_2215656 | MAGOH        | 0.494881124 |
| ILMN_3226613 | CLEC2D       | 0.494832251 |
| ILMN_3249748 | LDHA         | 0.494831196 |
| ILMN_1815552 | NTAN1        | 0.494824865 |
| ILMN_1812968 | SCX18        | 0.494824397 |
| ILMN_2137084 | LNH          | 0.49481219  |
| ILMN_1692247 | TRIM7        | 0.494766765 |
| ILMN_1796923 | LOC81691     | 0.494675391 |
| ILMN_1745385 | HNRNPM       | 0.49465425  |
| ILMN_1713496 | ST3GALS5     | 0.49444718  |
| ILMN_1659859 | MAGCH1       | 0.494431533 |
| ILMN_1788388 | NOVA2        | 0.494304399 |
| ILMN_1695413 | ZNF429       | 0.493936721 |
| ILMN_1667494 | SPTB         | 0.493891273 |
| ILMN_2174884 | XPO7         | 0.493816745 |
| ILMN_1781638 | HDDC3        | 0.493792169 |
| ILMN_1676688 | RAB37        | 0.493736683 |
| ILMN_2068498 | POU5F1B      | 0.493706358 |
| ILMN_1795341 | SRSF1        | 0.49361245  |
| ILMN_1740960 | MACROD1      | 0.493420795 |
| ILMN_3235448 | FLJ43681     | 0.493367993 |
| ILMN_1658826 | SAMD1        | 0.493357878 |
| ILMN_1706449 | PDCD2L       | 0.493346579 |
| ILMN_3241993 | RPL32        | 0.493322434 |
| ILMN_1703284 | SPIRE2       | 0.493322023 |
| ILMN_1743538 | MLL1D1       | 0.493161399 |
| ILMN_1802392 | RADS11       | 0.493148839 |
| ILMN_2219712 | HMG82        | 0.492982177 |
| ILMN_1694810 | PANX2        | 0.492968005 |
| ILMN_1755415 | SAMD3        | 0.492955818 |
| ILMN_1692684 | SMARCD2      | 0.492897682 |
| ILMN_1655422 | RPL17        | 0.492663695 |
| ILMN_2364700 | FN3A         | 0.492648874 |
| ILMN_2386037 | EPN2         | 0.492623029 |
| ILMN_1650777 | RUFY1        | 0.492317593 |
| ILMN_1722089 | RNF217       | 0.49209769  |
| ILMN_3240541 | EML2         | 0.492096323 |
| ILMN_1793559 | C6orf204     | 0.492020021 |
| ILMN_1790529 | LUM          | 0.491939043 |
| ILMN_1671263 | CACNA1H      | 0.491766242 |
| ILMN_1736828 | CHST10       | 0.491697467 |
| ILMN_1792710 | DAPK3        | 0.491650777 |
| ILMN_1763422 | OR6C5        | 0.491642353 |
| ILMN_1763386 | BID          | 0.491636209 |
| ILMN_3248324 | MGC16384     | 0.491513545 |
| ILMN_3213531 | RPL21        | 0.491381179 |
| ILMN_1713321 | CYP20A1      | 0.491351087 |
| ILMN_1763447 | PLXNB2       | 0.491313153 |
| ILMN_1745271 | EXOSC4       | 0.491293952 |
| ILMN_1680902 | LOC284998    | 0.491240073 |
| ILMN_1784110 | CKI8         | 0.491208885 |
| ILMN_1781916 | AVZ12037     | 0.491157459 |
| ILMN_2410421 | NBRF1        | 0.491073657 |
| ILMN_1680644 | MIO5         | 0.491073054 |
| ILMN_1687279 | DHPS         | 0.490911445 |
| ILMN_1872759 | BX099468     | 0.490817151 |
| ILMN_1756541 | MKG4         | 0.490519324 |
| ILMN_1746212 | INPP5D       | 0.490500174 |
| ILMN_1731299 | PML          | 0.490415044 |
| ILMN_1658531 | RPL7         | 0.490366126 |
| ILMN_2402392 | COL8A1       | 0.490360785 |
| ILMN_2126239 | SMG5         | 0.490354889 |
| ILMN_1655694 | FBNB1        | 0.490057029 |
| ILMN_2211003 | GAS3L3       | 0.490048185 |
| ILMN_3224758 | TUBB         | 0.489981408 |
| ILMN_1685042 | TENC1        | 0.489883813 |
| ILMN_1709975 | EDA          | 0.489881504 |
| ILMN_1763887 | SFI1         | 0.48988106  |
| ILMN_2386005 | MTOR3        | 0.489703551 |
| ILMN_1674874 | MFS010       | 0.488693258 |

|              |               |              |
|--------------|---------------|--------------|
| ILMN_1669410 | CHGA          | -0.581066882 |
| ILMN_1873492 | AU310952      | -0.581087784 |
| ILMN_1888492 | AA083069      | -0.581128033 |
| ILMN_1722135 | CNGA3         | -0.581247751 |
| ILMN_1766020 | EPADNL        | -0.581272575 |
| ILMN_1688753 | PTDSS1        | -0.581334158 |
| ILMN_1803745 | SUOX          | -0.581423552 |
| ILMN_1794190 | CCPG1         | -0.581509275 |
| ILMN_2216157 | GNAI2         | -0.581538317 |
| ILMN_2237348 | APTX          | -0.581570218 |
| ILMN_1715214 | PTPN7         | -0.581591341 |
| ILMN_1831566 | AK129542      | -0.581664659 |
| ILMN_1772540 | ATMIN         | -0.581674656 |
| ILMN_1677043 | AKR7A2        | -0.581772947 |
| ILMN_1790887 | USP21         | -0.581941994 |
| ILMN_1739155 | OR9A4         | -0.58207538  |
| ILMN_1671542 | NLGNAX        | -0.582127991 |
| ILMN_1685343 | NUPL1         | -0.582128556 |
| ILMN_1792150 | ALOX5         | -0.582185411 |
| ILMN_3270493 | FAM75A3       | -0.582195075 |
| ILMN_1735996 | NOX4          | -0.582249289 |
| ILMN_3296096 | SLC9A7P1      | -0.582332519 |
| ILMN_1810738 | YIPF5         | -0.582474003 |
| ILMN_1734542 | OVGP1         | -0.582495635 |
| ILMN_1716517 | KIAA0467      | -0.582550027 |
| ILMN_1676042 | NA            | -0.582681348 |
| ILMN_2412172 | AFORPC3F      | -0.582813263 |
| ILMN_1857017 | SNX8          | -0.582855519 |
| ILMN_1735453 | FAM98A        | -0.583006311 |
| ILMN_1766896 | ZDHC19        | -0.583084403 |
| ILMN_2366490 | ZNF706        | -0.583093261 |
| ILMN_3276192 | NA            | -0.583099035 |
| ILMN_1652824 | MTMR9         | -0.583305039 |
| ILMN_2387799 | PDPK1         | -0.583360512 |
| ILMN_1873411 | D8350505      | -0.583499573 |
| ILMN_1655780 | METTL10       | -0.583596448 |
| ILMN_1852349 | AH34856       | -0.583602406 |
| ILMN_1786172 | GT2H2         | -0.583658313 |
| ILMN_3211047 | BASP1P1       | -0.583697164 |
| ILMN_1779241 | CRYM          | -0.583721159 |
| ILMN_1751424 | LOC100131910  | -0.583990921 |
| ILMN_1715351 | AIMP1         | -0.584002475 |
| ILMN_2411745 | EM11          | -0.584002963 |
| ILMN_1749162 | DIG2          | -0.584033343 |
| ILMN_1742044 | GNAI1         | -0.584131839 |
| ILMN_1654129 | AIDA          | -0.584140961 |
| ILMN_1711628 | KRTAP1-3      | -0.584161315 |
| ILMN_1655509 | ASAH1         | -0.584172863 |
| ILMN_2384966 | ZHX2          | -0.584348765 |
| ILMN_1762672 | CHD9          | -0.584418456 |
| ILMN_1784989 | TMEM191B      | -0.584474061 |
| ILMN_1729965 | Cxorf66       | -0.58447539  |
| ILMN_1699357 | SLC2A5        | -0.584522437 |
| ILMN_1654542 | FAM172A       | -0.584766971 |
| ILMN_2238336 | CHORDC1       | -0.584972198 |
| ILMN_1702124 | LNK2          | -0.585050669 |
| ILMN_1781890 | KIAL1486      | -0.585130905 |
| ILMN_2262362 | ABCG1         | -0.585150795 |
| ILMN_3243788 | TMEM146       | -0.585226949 |
| ILMN_1666325 | ALG10B        | -0.585245166 |
| ILMN_1784818 | OPN5          | -0.585304882 |
| ILMN_1675346 | CCRL2         | -0.585395111 |
| ILMN_1709142 | PURA          | -0.585425954 |
| ILMN_1891277 | NA            | -0.585458668 |
| ILMN_2262749 | SOCS5         | -0.585543162 |
| ILMN_3203815 | KPNA4         | -0.585592432 |
| ILMN_3268232 | DKF2p761K2322 | -0.585597348 |
| ILMN_2199439 | CA2           | -0.585640811 |
| ILMN_2174729 | ZNF318        | -0.585668974 |
| ILMN_2263312 | FAM125B       | -0.585773002 |
| ILMN_3262439 | FLJ46552      | -0.585816081 |
| ILMN_1715185 | SPRYD5        | -0.585950936 |
| ILMN_1762615 | FAM175B       | -0.585992144 |
| ILMN_3247441 | NA            | -0.586055915 |
| ILMN_1908463 | AA400272      | -0.586099584 |
| ILMN_1752559 | FBR5          | -0.58606086  |
| ILMN_1797301 | C1orf183      | -0.58621027  |
| ILMN_1824784 | BX111027      | -0.586328219 |
| ILMN_3261022 | NA            | -0.586332795 |
| ILMN_2152711 | ACR3A         | -0.586467995 |
| ILMN_1801605 | BIRC6         | -0.586484815 |
| ILMN_1764120 | IGF2AS        | -0.586500411 |
| ILMN_1718135 | PRAMEF11      | -0.586628969 |
| ILMN_1786433 | BCIP1         | -0.586810196 |
| ILMN_2086212 | WRB11         | -0.58684758  |
| ILMN_1698512 | AKO96668      | -0.586876261 |
| ILMN_2206500 | UGT2B4        | -0.586946982 |
| ILMN_1787595 | B3GALNT1      | -0.586961787 |
| ILMN_3225432 | LAMTOR3       | -0.587002558 |
| ILMN_3299929 | CR625008      | -0.587097919 |
| ILMN_1810930 | C6orf223      | -0.587407894 |
| ILMN_1815192 | ACRTR1        | -0.587517148 |
| ILMN_1701991 | SYN1          | -0.58762013  |
| ILMN_1704070 | AK125723      | -0.587840633 |
| ILMN_2325998 | ICK           | -0.587882198 |
| ILMN_1679728 | WDR87         | -0.587921023 |
| ILMN_1674551 | SAMD5         | -0.587955068 |
| ILMN_1673867 | LMO2          | -0.587963985 |

|              |           |             |
|--------------|-----------|-------------|
| ILMN_2319910 | DGKA      | 0.48865396  |
| ILMN_1717490 | RPL6      | 0.489559915 |
| ILMN_2075297 | STK40     | 0.489547738 |
| ILMN_2066124 | AFG12     | 0.489399383 |
| ILMN_1700231 | IP6K1     | 0.489326216 |
| ILMN_1741288 | ZNF136    | 0.489297788 |
| ILMN_1709348 | ALDH1A1   | 0.489210941 |
| ILMN_1722073 | MLXPL     | 0.489186917 |
| ILMN_1793241 | SRD5A1    | 0.489164556 |
| ILMN_2358647 | FBXO21    | 0.489119618 |
| ILMN_3243909 | SNORD102  | 0.488932251 |
| ILMN_1732398 | SCGB2A1   | 0.488917915 |
| ILMN_1788160 | KIF5B     | 0.488494718 |
| ILMN_1729130 | C7orf42   | 0.488467116 |
| ILMN_2965248 | HVCN1     | 0.488452125 |
| ILMN_1765880 | C16orf57  | 0.488382609 |
| ILMN_2377900 | MAP1B     | 0.488362486 |
| ILMN_1676759 | DDX27     | 0.488306383 |
| ILMN_2349393 | MDK       | 0.488186027 |
| ILMN_1727078 | C17orf37  | 0.487894039 |
| ILMN_1715969 | SAC2SA37  | 0.487799214 |
| ILMN_1810486 | RAB34     | 0.487773338 |
| ILMN_1753393 | OSGEP     | 0.487730111 |
| ILMN_3180989 | DSTYK     | 0.487585875 |
| ILMN_1735548 | HIVEP1    | 0.487478875 |
| ILMN_1667086 | AP3M1     | 0.487301616 |
| ILMN_1791813 | SUZ12     | 0.487154061 |
| ILMN_1812278 | LYO       | 0.487111102 |
| ILMN_1845201 | N3S251    | 0.487095401 |
| ILMN_1757408 | ZNF256    | 0.486992937 |
| ILMN_2060413 | CD24      | 0.486914908 |
| ILMN_2331121 | FCGFB2B   | 0.486903071 |
| ILMN_1666372 | ATPSH     | 0.486880366 |
| ILMN_1722025 | CPEB4     | 0.486874006 |
| ILMN_1652237 | CBR3      | 0.486841257 |
| ILMN_1745593 | STMN1     | 0.486820475 |
| ILMN_1807596 | UBAP1     | 0.486787714 |
| ILMN_1723358 | SCAR3A3   | 0.486715746 |
| ILMN_1797786 | MAP2K12   | 0.486691392 |
| ILMN_1677756 | URE2D2    | 0.486602141 |
| ILMN_1775753 | FBXW2     | 0.486539752 |
| ILMN_3247556 | C8orf73   | 0.486524121 |
| ILMN_1799642 | TRIM24    | 0.486439826 |
| ILMN_2328736 | ZP952     | 0.486411849 |
| ILMN_1726981 | VEGFB     | 0.486303024 |
| ILMN_1717324 | NR_024104 | 0.486205258 |
| ILMN_1747683 | AQP4      | 0.485859599 |
| ILMN_1729374 | ETFB      | 0.485847974 |
| ILMN_1720442 | NCBP2     | 0.485804813 |
| ILMN_1778213 | STK32     | 0.485797085 |
| ILMN_1506187 | LOC283070 | 0.485759023 |
| ILMN_2327346 | SSBP4     | 0.485756669 |
| ILMN_2072140 | BTFL4     | 0.485729248 |
| ILMN_3235932 | BMS1      | 0.485669877 |
| ILMN_1845086 | AL110204  | 0.485496259 |
| ILMN_1716078 | TMEM181   | 0.485455646 |
| ILMN_1750350 | MED27     | 0.485378785 |
| ILMN_1700935 | HAS2      | 0.48525124  |
| ILMN_1651415 | DERL3     | 0.485177555 |
| ILMN_1668683 | MLL       | 0.485088848 |
| ILMN_1756542 | TBC1D17   | 0.485069711 |
| ILMN_2399896 | SEC11A    | 0.484793994 |
| ILMN_2045800 | C11orf65  | 0.484717113 |
| ILMN_1674250 | NCKAP1L   | 0.484617595 |
| ILMN_1790533 | PHACTR2   | 0.48449189  |
| ILMN_1795454 | CP5F6     | 0.484478695 |
| ILMN_2326821 | HSPB1     | 0.484393619 |
| ILMN_1776154 | CCG3      | 0.48441194  |
| ILMN_1779875 | THY1      | 0.484087824 |
| ILMN_1780291 | NFAT5     | 0.483918901 |
| ILMN_2294784 | PRDM1     | 0.483811541 |
| ILMN_1791144 | PMS2L14   | 0.48377347  |
| ILMN_2345982 | SNAP47    | 0.48370369  |
| ILMN_1728699 | SPYTD1    | 0.483591535 |
| ILMN_3295235 | LOC389493 | 0.483581402 |
| ILMN_1737164 | TM9SF1    | 0.483485269 |
| ILMN_1669722 | LRR61     | 0.48333021  |
| ILMN_1779639 | IRAK1BP1  | 0.483264672 |
| ILMN_2371251 | MPS       | 0.483241584 |
| ILMN_1696494 | CMTM6     | 0.483151607 |
| ILMN_1814650 | TRAPPCC4  | 0.483108562 |
| ILMN_1681503 | MCM2      | 0.483092373 |
| ILMN_1665871 | ANGELL1   | 0.483055539 |
| ILMN_1791569 | PLXNA1    | 0.482969284 |
| ILMN_3288346 | AAT7A7493 | 0.482968105 |
| ILMN_1801939 | CN2B2     | 0.482962552 |
| ILMN_2374383 | TSPAN17   | 0.4828173   |
| ILMN_1676605 | ANKRD42   | 0.482672258 |
| ILMN_1763326 | C5orf25   | 0.482611271 |
| ILMN_1685810 | NFATC3    | 0.482592924 |
| ILMN_1651610 | SPRY1     | 0.482348217 |
| ILMN_1694966 | ASG2      | 0.482107371 |
| ILMN_1654851 | FAM134A   | 0.482084688 |
| ILMN_2410826 | OAS1      | 0.48207147  |
| ILMN_1677108 | CAPN13    | 0.482033316 |
| ILMN_2152402 | ABHD16A   | 0.48195782  |
| ILMN_1798808 | FOXN1     | 0.48180349  |
| ILMN_1662302 | IL2BA     | 0.481928957 |

|              |              |              |
|--------------|--------------|--------------|
| ILMN_1799224 | FANCA        | -0.588012911 |
| ILMN_1788530 | ADPRH1       | -0.588164378 |
| ILMN_1725707 | ATG16L1      | -0.588199718 |
| ILMN_1687404 | HGN1         | -0.588209944 |
| ILMN_1773002 | C10orf140    | -0.588270068 |
| ILMN_1788156 | EPM2A        | -0.588406785 |
| ILMN_1789676 | AOX2         | -0.58841275  |
| ILMN_1662914 | CTAGE5       | -0.588477966 |
| ILMN_1660787 | SUCLA2       | -0.588530044 |
| ILMN_3223813 | FOSL1        | -0.588637509 |
| ILMN_1791280 | HSPB8        | -0.588693904 |
| ILMN_2272701 | ATR          | -0.588698346 |
| ILMN_2353978 | ACOT11       | -0.588731591 |
| ILMN_3301824 | TSEN15       | -0.588753846 |
| ILMN_2057196 | LOC100507170 | -0.588756485 |
| ILMN_1846537 | AW081377     | -0.588813021 |
| ILMN_1733669 | CDH18        | -0.588844486 |
| ILMN_2181064 | G8A3         | -0.588960793 |
| ILMN_2414302 | FDXR         | -0.589006994 |
| ILMN_3233229 | SMHG7        | -0.589143187 |
| ILMN_1698811 | ABHD13B      | -0.58945117  |
| ILMN_1843648 | AWR73324     | -0.589437869 |
| ILMN_1746457 | GTF3C2       | -0.589462187 |
| ILMN_295390  | NA           | -0.589537788 |
| ILMN_1767103 | C11orf63     | -0.589587311 |
| ILMN_3185784 | LOC100125556 | -0.589671653 |
| ILMN_1664102 | SY1          | -0.58972931  |
| ILMN_2342762 | KCNAB2       | -0.589767126 |
| ILMN_2349831 | DICER1       | -0.589837338 |
| ILMN_2211630 | HINT3        | -0.589922899 |
| ILMN_2204983 | DCTN6        | -0.589941584 |
| ILMN_2393710 | PTP4A3       | -0.589970117 |
| ILMN_2177962 | GRIN         | -0.589993213 |
| ILMN_1756623 | NTSC1B       | -0.590031917 |
| ILMN_1788928 | ABC89        | -0.590058137 |
| ILMN_2121555 | FBXOS        | -0.590260239 |
| ILMN_3184599 | FLJ37786     | -0.590324039 |
| ILMN_1874678 | BCO50540     | -0.590501885 |
| ILMN_2393656 | DDO          | -0.590534272 |
| ILMN_1767281 | PPBP         | -0.590777511 |
| ILMN_2344850 | VPS26A       | -0.591021292 |
| ILMN_2317493 | SEMA6D       | -0.591041854 |
| ILMN_1701614 | CDC73        | -0.591083895 |
| ILMN_1652662 | GRB10        | -0.591138425 |
| ILMN_1831907 | AIG33777     | -0.591139938 |
| ILMN_1654013 | C17orf28     | -0.591402486 |
| ILMN_2151056 | C10orf32     | -0.591428746 |
| ILMN_1899400 | DA11236      | -0.591434043 |
| ILMN_1809838 | PIGF         | -0.591474867 |
| ILMN_1770485 | PTPRN8       | -0.591587092 |
| ILMN_2353129 | EY42         | -0.591593523 |
| ILMN_3265895 | HNRNPR       | -0.591613423 |
| ILMN_1838660 | BUG20514     | -0.591681069 |
| ILMN_1732575 | SEC14L1      | -0.591792705 |
| ILMN_1729019 | sept-07      | -0.591948442 |
| ILMN_2191900 | MATK         | -0.592032606 |
| ILMN_1778734 | FANL         | -0.592068154 |
| ILMN_1891324 | AK126122     | -0.592106411 |
| ILMN_1881668 | BCO21745     | -0.592195445 |
| ILMN_1876729 | LOC340544    | -0.592234266 |
| ILMN_1913641 | AKO55370     | -0.592282692 |
| ILMN_1661799 | HGD14        | -0.592300118 |
| ILMN_1662064 | PRMT3        | -0.592373018 |
| ILMN_2390526 | RARB         | -0.592423853 |
| ILMN_1823477 | BX117128     | -0.592435622 |
| ILMN_1762995 | KANK1        | -0.592444471 |
| ILMN_1685722 | EF4A2        | -0.592493556 |
| ILMN_1805742 | DNAJ7        | -0.592519494 |
| ILMN_1702443 | DNMBP        | -0.59255992  |
| ILMN_1707368 | OPRD1        | -0.592735903 |
| ILMN_1812503 | PHKA1        | -0.592763498 |
| ILMN_1713896 | FAM188B2     | -0.592973459 |
| ILMN_1692041 | POT1         | -0.592977832 |
| ILMN_1708934 | ADAM         | -0.593002156 |
| ILMN_1699334 | AATK         | -0.593042199 |
| ILMN_3308015 | MIR188       | -0.59314403  |
| ILMN_1798533 | ZNF22        | -0.593148096 |
| ILMN_3237779 | TMEM184C     | -0.59315685  |
| ILMN_1804152 | KCNHG        | -0.593401549 |
| ILMN_1814526 | AD33         | -0.593417519 |
| ILMN_1740180 | SNX3         | -0.593446118 |
| ILMN_2213558 | Tmp21-II     | -0.59346438  |
| ILMN_1807771 | CDK15        | -0.593477977 |
| ILMN_2348975 | NASP         | -0.593481023 |
| ILMN_1689714 | NIR41        | -0.593581192 |
| ILMN_2232689 | MS4A13       | -0.593694833 |
| ILMN_1832072 | FOF070       | -0.593713383 |
| ILMN_1727709 | GPBAR1       | -0.593834841 |
| ILMN_3309133 | MIR429       | -0.593957502 |
| ILMN_1806486 | ARMC10       | -0.594039644 |
| ILMN_1799996 | DH1          | -0.594017807 |
| ILMN_2167922 | TRMT5        | -0.594018506 |
| ILMN_1664253 | LRR30        | -0.594061059 |
| ILMN_1880983 | BCO71719     | -0.594074532 |
| ILMN_2310253 | TARBP2       | -0.594109379 |
| ILMN_1809853 | PHLD83       | -0.594237784 |
| ILMN_1806510 | GPBB9A       | -0.594243033 |
| ILMN_1811489 | TCRA         | -0.594284049 |

|              |               |             |
|--------------|---------------|-------------|
| ILMN_2129563 | LDLRAD3       | 0.481902388 |
| ILMN_1676099 | SPON2         | 0.481902142 |
| ILMN_2392286 | IPK1          | 0.481855097 |
| ILMN_2381655 | EDA           | 0.48185922  |
| ILMN_3268914 | CLEC2D        | 0.481854092 |
| ILMN_1694203 | ZNF141        | 0.481828814 |
| ILMN_1872122 | LCOR          | 0.481498748 |
| ILMN_3246953 | FTS1D2        | 0.481485344 |
| ILMN_1653026 | PLAC8         | 0.481479123 |
| ILMN_1678085 | PCMT2         | 0.481434704 |
| ILMN_1728761 | ERBB2         | 0.4813953   |
| ILMN_1719975 | H0XC4         | 0.481394934 |
| ILMN_1713380 | EIF2B2        | 0.481364481 |
| ILMN_1658207 | MSLN          | 0.481315442 |
| ILMN_1767689 | RHF01         | 0.481249849 |
| ILMN_1718336 | C7orf50       | 0.481135756 |
| ILMN_1771209 | OR2T8         | 0.481146511 |
| ILMN_2276811 | METTL17       | 0.48094712  |
| ILMN_1815445 | IDS           | 0.480927479 |
| ILMN_1694111 | PNKP          | 0.480923556 |
| ILMN_2044771 | NCR3          | 0.480814864 |
| ILMN_1679917 | ARL16         | 0.480808023 |
| ILMN_1815812 | C16orf5       | 0.480766779 |
| ILMN_1794392 | DDX3X         | 0.480701849 |
| ILMN_1654685 | MCTP1         | 0.48060225  |
| ILMN_2205891 | SMAAD7        | 0.48055687  |
| ILMN_1678385 | PKM2          | 0.48045501  |
| ILMN_2117716 | SFRCS17A      | 0.480419939 |
| ILMN_3234920 | NPIPL3        | 0.480388729 |
| ILMN_2092160 | KIAA1704      | 0.480301716 |
| ILMN_1720819 | SPCS2         | 0.480022259 |
| ILMN_2328776 | MST4          | 0.480019812 |
| ILMN_3178471 | ESPNL         | 0.479972661 |
| ILMN_1715189 | LHX6          | 0.479917449 |
| ILMN_2261379 | SRGAP2        | 0.479784199 |
| ILMN_2267383 | CUGB7675      | 0.479714549 |
| ILMN_1768260 | GAS6          | 0.479707023 |
| ILMN_1755290 | CEP170        | 0.479672733 |
| ILMN_2363409 | IRE           | 0.4796454   |
| ILMN_1799232 | ATP9A         | 0.479623987 |
| ILMN_3237448 | BEND5         | 0.479600099 |
| ILMN_1778240 | GFOO1         | 0.479599068 |
| ILMN_1712896 | FST           | 0.479593699 |
| ILMN_1731783 | ATP1A1        | 0.479590672 |
| ILMN_1748221 | PAD6          | 0.479479147 |
| ILMN_1756285 | FFAR1         | 0.479264536 |
| ILMN_2051731 | DUSP5P        | 0.479235722 |
| ILMN_1653788 | RNF208        | 0.479227145 |
| ILMN_1703500 | KCNQ2         | 0.479126517 |
| ILMN_2173835 | FTH1BP        | 0.478856247 |
| ILMN_1727658 | RABL2A        | 0.478834361 |
| ILMN_1755123 | GBA           | 0.478795256 |
| ILMN_2186061 | PKFB3         | 0.478780719 |
| ILMN_1657406 | NUP50         | 0.478692672 |
| ILMN_1793433 | H2BFM         | 0.478689315 |
| ILMN_1893400 | FAM98B        | 0.478630797 |
| ILMN_1723843 | CSN2A2        | 0.478575377 |
| ILMN_1762046 | ZNF551        | 0.478456492 |
| ILMN_2112049 | DNL2          | 0.478407055 |
| ILMN_1658333 | ECM1          | 0.478345883 |
| ILMN_3238369 | JHDM1D        | 0.478079146 |
| ILMN_1700204 | ZNF408        | 0.477972309 |
| ILMN_1711627 | SIAH1         | 0.477971874 |
| ILMN_1655961 | NAG8          | 0.477942993 |
| ILMN_1783832 | GAGE6         | 0.477939798 |
| ILMN_2411559 | PUS1          | 0.477933775 |
| ILMN_2355971 | HSD17B10      | 0.477884777 |
| ILMN_2363065 | RTN1          | 0.477832464 |
| ILMN_2290618 | SEC22C        | 0.477801527 |
| ILMN_1787691 | CITFD4        | 0.477771356 |
| ILMN_2350801 | SLC25A29      | 0.477729782 |
| ILMN_1697629 | JMID7-PLA2G4B | 0.477711459 |
| ILMN_1670101 | CLEC2D        | 0.477677585 |
| ILMN_3193216 | CLEC2D        | 0.477638611 |
| ILMN_1663954 | THL1          | 0.477612686 |
| ILMN_1702775 | LRP5          | 0.477585623 |
| ILMN_1776121 | C2orf55       | 0.47758022  |
| ILMN_1773809 | FOXP4         | 0.477496046 |
| ILMN_1751171 | HR23P1        | 0.47747895  |
| ILMN_2196335 | CL2orf11      | 0.477472587 |
| ILMN_1740426 | RASD1         | 0.477420498 |
| ILMN_1723684 | DARC          | 0.477385313 |
| ILMN_1664466 | KLHL9         | 0.477356996 |
| ILMN_1806123 | MARP23        | 0.477335769 |
| ILMN_2388452 | SERPINA1      | 0.477317043 |
| ILMN_1716868 | SPOYE3        | 0.477286344 |
| ILMN_1788019 | LAMA2         | 0.477257898 |
| ILMN_1759595 | GNB1L         | 0.477177985 |
| ILMN_1779813 | FAM98B        | 0.477153543 |
| ILMN_2075818 | ZNF598        | 0.477044232 |
| ILMN_1685678 | EF1B2         | 0.477017763 |
| ILMN_1671809 | DUSP22        | 0.477009429 |
| ILMN_1703049 | AKAP7         | 0.476986637 |
| ILMN_1653340 | RECQL5        | 0.476873421 |
| ILMN_1723709 | C9orf116      | 0.476697113 |
| ILMN_1797793 | BLVNB         | 0.476617497 |
| ILMN_2081398 | NF3B          | 0.476552932 |
| ILMN_1729208 | NGFRAP1       | 0.476540375 |

|              |              |              |
|--------------|--------------|--------------|
| ILMN_1692219 | RAB11FIP1    | -0.594302538 |
| ILMN_1661994 | ESRRG        | -0.594505063 |
| ILMN_1688666 | HST1H2BH     | -0.594647942 |
| ILMN_3129879 | SNORD115-15  | -0.594895109 |
| ILMN_1779674 | PTPRG        | -0.594918168 |
| ILMN_1706225 | N4BP1        | -0.594959459 |
| ILMN_3241690 | PBMUCL1      | -0.594979759 |
| ILMN_3284127 | TRIM64B      | -0.594992361 |
| ILMN_3207902 | GUSBP1D      | -0.595065886 |
| ILMN_2133996 | SHE          | -0.59509045  |
| ILMN_1748894 | GTPBP3       | -0.595227013 |
| ILMN_1799710 | CCDC96       | -0.595331885 |
| ILMN_2218002 | LPC          | -0.595340029 |
| ILMN_3239103 | LOC340357    | -0.59541972  |
| ILMN_1746952 | SLC25A48     | -0.595539023 |
| ILMN_1768957 | CS           | -0.595696612 |
| ILMN_1683067 | ELSPBP1      | -0.595691076 |
| ILMN_2226628 | ZNF184       | -0.59571385  |
| ILMN_2115421 | SLC25A16     | -0.595805095 |
| ILMN_1778876 | FAM179B      | -0.595854108 |
| ILMN_3133871 | ATN1L        | -0.59606404  |
| ILMN_1862302 | TMF1         | -0.596584225 |
| ILMN_1899387 | BCO39440     | -0.596868205 |
| ILMN_1657968 | MAP2K2       | -0.596895716 |
| ILMN_1911007 | AA486889     | -0.597094137 |
| ILMN_3307868 | CH1L1        | -0.597202078 |
| ILMN_1702171 | LPC1A1       | -0.597323606 |
| ILMN_3307836 | SLCSA12      | -0.59742603  |
| ILMN_2121816 | GPR137B      | -0.597510422 |
| ILMN_1905548 | MBNL3        | -0.597533486 |
| ILMN_1693043 | BCO37970     | -0.597593653 |
| ILMN_3296468 | AK123450     | -0.59760563  |
| ILMN_3184437 | LOC100130285 | -0.597811697 |
| ILMN_1910294 | AA335815     | -0.597701354 |
| ILMN_1758474 | PRKRA        | -0.597721575 |
| ILMN_1664348 | PNPLA4       | -0.59779371  |
| ILMN_3268535 | C15orf34     | -0.597813064 |
| ILMN_1746784 | SLAIN1       | -0.597943313 |
| ILMN_1803211 | FENX2        | -0.597952201 |
| ILMN_1776412 | KRTAP10-11   | -0.59795327  |
| ILMN_1877896 | AW195018     | -0.598027514 |
| ILMN_1710200 | NA           | -0.598406758 |
| ILMN_1656798 | TMM17A       | -0.598537146 |
| ILMN_2171904 | ZNF22        | -0.59865483  |
| ILMN_1795704 | KIAA0332     | -0.598691099 |
| ILMN_2347888 | LARP4        | -0.598954793 |
| ILMN_1677464 | LGR6         | -0.599003131 |
| ILMN_1718852 | PLCL1        | -0.59914607  |
| ILMN_1842039 | CA435101     | -0.599189882 |
| ILMN_2153816 | HSD1A2       | -0.59924124  |
| ILMN_1727212 | UBE2J2       | -0.599312391 |
| ILMN_1665632 | POU5F1       | -0.599541857 |
| ILMN_1666624 | RABL2A       | -0.59957178  |
| ILMN_3251511 | SCAF11       | -0.59982377  |
| ILMN_3307025 | ZDHHC4       | -0.599827347 |
| ILMN_2064237 | C1orf88      | -0.59984082  |
| ILMN_1755909 | C2orf11      | -0.59987522  |
| ILMN_1798108 | C6orf211     | -0.599886585 |
| ILMN_1707775 | ZNF257       | -0.599968887 |
| ILMN_1787980 | SNORD109B    | -0.60009845  |
| ILMN_1755834 | FEN1         | -0.600305003 |
| ILMN_1748427 | SC13         | -0.600305002 |
| ILMN_1727875 | MUC6         | -0.600430917 |
| ILMN_1672287 | MYNN         | -0.600607909 |
| ILMN_1760620 | TMEM33       | -0.600674075 |
| ILMN_1712959 | DUSP2        | -0.600683812 |
| ILMN_1683859 | SLCTA1       | -0.600755588 |
| ILMN_2389935 | FTYD1        | -0.600780933 |
| ILMN_1727444 | C16orf53     | -0.600813286 |
| ILMN_1739886 | HNF4A        | -0.600996887 |
| ILMN_1694043 | DNAH14       | -0.600990258 |
| ILMN_1754315 | MMAA         | -0.601084576 |
| ILMN_1712161 | BCOR         | -0.601249206 |
| ILMN_2137240 | AKTIP        | -0.601323123 |
| ILMN_1769449 | MBLAC2       | -0.601356844 |
| ILMN_1718925 | C14orf49     | -0.601467722 |
| ILMN_1761260 | COBLL1       | -0.601555441 |
| ILMN_2047354 | C1orf97      | -0.601574579 |
| ILMN_2088612 | XP04         | -0.601621083 |
| ILMN_1868118 | LOC100130691 | -0.601622136 |
| ILMN_1697550 | ACY2P        | -0.60175419  |
| ILMN_1746856 | RAB21        | -0.601828183 |
| ILMN_1893686 | W9S809       | -0.601834274 |
| ILMN_1874302 | BE646122     | -0.601878248 |
| ILMN_1807861 | BM858970     | -0.601891462 |
| ILMN_3199172 | AI691714     | -0.601934544 |
| ILMN_207562  | APIA9        | -0.602037294 |
| ILMN_3309443 | MIR365-1     | -0.602396615 |
| ILMN_3228470 | NACAD        | -0.602371232 |
| ILMN_1721138 | GRPEL2       | -0.602470532 |
| ILMN_3199507 | LOC283922    | -0.602525133 |
| ILMN_2139061 | COP2         | -0.602507418 |
| ILMN_1652357 | PDHK         | -0.602550506 |
| ILMN_2058347 | NTSDC1       | -0.602559948 |
| ILMN_1803180 | PRDX6        | -0.602722017 |
| ILMN_2067813 | OR114        | -0.602738659 |
| ILMN_2145760 | YRF4         | -0.60311948  |
| ILMN_1751051 | C7orf25      | -0.603228511 |

|              |              |             |
|--------------|--------------|-------------|
| ILMN_1794666 | TSSK1B       | 0.476446661 |
| ILMN_1680145 | SART1        | 0.476443829 |
| ILMN_1681296 | ICAMA4       | 0.476443864 |
| ILMN_1658464 | GTF3A        | 0.47637742  |
| ILMN_2402817 | ZBTB16       | 0.476170656 |
| ILMN_2413041 | TEAD4        | 0.476110254 |
| ILMN_1670028 | LPIN2        | 0.476002341 |
| ILMN_1786326 | KCTD15       | 0.475916765 |
| ILMN_2086105 | SPRY4        | 0.475884051 |
| ILMN_1780243 | SPS13B       | 0.475839188 |
| ILMN_1721046 | PTMS         | 0.475741363 |
| ILMN_1803561 | PLA2G4A      | 0.475652918 |
| ILMN_3242174 | SEZ6L2       | 0.475626322 |
| ILMN_1755405 | PGAP2        | 0.47559919  |
| ILMN_1664812 | MGC27345     | 0.47557798  |
| ILMN_1651719 | MBTFS1       | 0.475576667 |
| ILMN_1662426 | AP2S1        | 0.4754879   |
| ILMN_1736729 | OAS2         | 0.475269334 |
| ILMN_1679003 | MLL          | 0.475269009 |
| ILMN_3300226 | LOC731275    | 0.475265165 |
| ILMN_1786546 | GNAO1        | 0.475202396 |
| ILMN_1693598 | RTN4         | 0.47511278  |
| ILMN_1729832 | EIF4H        | 0.474989502 |
| ILMN_2235283 | MAPK1        | 0.474878262 |
| ILMN_1773082 | CYP21A1P     | 0.474648548 |
| ILMN_1719139 | KLHL13       | 0.474638045 |
| ILMN_1778631 | DEFB136      | 0.474549034 |
| ILMN_2063500 | IFIT2        | 0.474448982 |
| ILMN_1781636 | VWAL1        | 0.474391788 |
| ILMN_2078334 | CNOT10       | 0.474356606 |
| ILMN_2383913 | WDR33        | 0.474227119 |
| ILMN_1696360 | CTSB         | 0.474226336 |
| ILMN_1698347 | CTSC         | 0.474219917 |
| ILMN_2054510 | BICAS3       | 0.474206862 |
| ILMN_2391512 | NAAA         | 0.474203659 |
| ILMN_1711828 | ANKRD10      | 0.474095753 |
| ILMN_1796710 | PHC1         | 0.474051299 |
| ILMN_1813240 | EIF1AX       | 0.473994682 |
| ILMN_1700248 | WDR96        | 0.473927025 |
| ILMN_3298511 | LOC728537    | 0.473844704 |
| ILMN_1676938 | HMG81        | 0.473765357 |
| ILMN_2347798 | IFIB         | 0.473758484 |
| ILMN_1672662 | SLC20A1      | 0.473593374 |
| ILMN_1695290 | SHMG6        | 0.473582384 |
| ILMN_2364174 | CNWL11       | 0.473525113 |
| ILMN_1769207 | KCTD7        | 0.473442011 |
| ILMN_1766668 | PCDH7        | 0.473428218 |
| ILMN_2070375 | GPR82        | 0.473416315 |
| ILMN_1657594 | RPA2P        | 0.473329437 |
| ILMN_1678869 | RNR2         | 0.473250884 |
| ILMN_1775451 | KLK6         | 0.473226936 |
| ILMN_1673023 | EP400        | 0.473220769 |
| ILMN_1738251 | DRD3         | 0.473197075 |
| ILMN_2100000 | DHX36        | 0.473107908 |
| ILMN_2278850 | RAB24        | 0.473043923 |
| ILMN_2329383 | CISBP        | 0.472989668 |
| ILMN_1733519 | HMG83        | 0.472913594 |
| ILMN_3218223 | MPHOSP110    | 0.472871812 |
| ILMN_1778143 | GRAP2        | 0.472758034 |
| ILMN_3200484 | RPS4X        | 0.472728385 |
| ILMN_1655068 | TOM1L2       | 0.472651262 |
| ILMN_1727706 | Clorf132-AS1 | 0.47261059  |
| ILMN_1741455 | USP90        | 0.472525127 |
| ILMN_2074432 | OR2A2        | 0.472508058 |
| ILMN_1686245 | OR6G1        | 0.472407993 |
| ILMN_1786908 | KRTAP26-1    | 0.472403704 |
| ILMN_1698100 | ANKP2        | 0.472385098 |
| ILMN_1760347 | SRGN         | 0.472381027 |
| ILMN_2359601 | CAMK2G       | 0.472355945 |
| ILMN_1773470 | ST5          | 0.472342718 |
| ILMN_2326953 | LAT2         | 0.47219623  |
| ILMN_1759359 | BTF3L4       | 0.472110796 |
| ILMN_1666663 | DYRK1A       | 0.472090177 |
| ILMN_1676501 | ADD3         | 0.47183733  |
| ILMN_1712432 | PSMD2        | 0.471763835 |
| ILMN_1804339 | CAMK1G       | 0.471749731 |
| ILMN_1804396 | IRF2BP1      | 0.471702152 |
| ILMN_1812940 | TRMT1        | 0.471699321 |
| ILMN_1809477 | CARHSP1      | 0.471664605 |
| ILMN_1812638 | ATPS1        | 0.471643822 |
| ILMN_1733667 | DHX35        | 0.471561968 |
| ILMN_3187497 | AK123679     | 0.471499635 |
| ILMN_1764764 | MUM1         | 0.471390592 |
| ILMN_2318725 | EEF1B2       | 0.471384905 |
| ILMN_3251638 | SENP5        | 0.471384139 |
| ILMN_1744050 | ASB7         | 0.471265822 |
| ILMN_1679299 | IGSF1        | 0.471139825 |
| ILMN_1785644 | C20orf29     | 0.471107483 |
| ILMN_2062620 | NMT2         | 0.471057226 |
| ILMN_1674620 | SGCE         | 0.470996053 |
| ILMN_1707943 | Clorf19      | 0.470965564 |
| ILMN_1738883 | RNF135       | 0.470879291 |
| ILMN_1684690 | HDAC11       | 0.47085967  |
| ILMN_1701789 | IFIT3        | 0.470853221 |
| ILMN_1737394 | LMNA         | 0.470783416 |
| ILMN_1742929 | HESX1        | 0.470502419 |
| ILMN_2300970 | ETFB         | 0.470472229 |
| ILMN_1723017 | LOC728643    | 0.470454756 |

|              |               |               |
|--------------|---------------|---------------|
| ILMN_3286751 | LOC284648     | -0.603384059  |
| ILMN_1809964 | OR101         | -0.603421769  |
| ILMN_1733904 | C20orf114     | -0.603467928  |
| ILMN_1658222 | LOC546329     | -0.603516746  |
| ILMN_1759540 | SRGAP2        | -0.603529404  |
| ILMN_1723333 | SCGB2A2       | -0.603543197  |
| ILMN_1665501 | LOC389634     | -0.603612023  |
| ILMN_2283597 | FAM134B       | -0.603667135  |
| ILMN_1769388 | GJB2          | -0.60369781   |
| ILMN_1720270 | C20orf2       | -0.603699917  |
| ILMN_3245098 | KC6           | -0.604083135  |
| ILMN_3274344 | NA            | -0.604094361  |
| ILMN_1794949 | RCAN2         | -0.604131718  |
| ILMN_1735762 | NPNT          | -0.604233822  |
| ILMN_3223246 | TBC1D3        | -0.604237238  |
| ILMN_1832155 | DCIWI1D5      | -0.604244724  |
| ILMN_1711227 | GMD5          | -0.604351912  |
| ILMN_2221076 | C17orf85      | -0.604354545  |
| ILMN_1660793 | PAQR4         | -0.604385504  |
| ILMN_1670385 | TUBAL3        | -0.604594997  |
| ILMN_1694777 | MGAT5B        | -0.604641185  |
| ILMN_1804350 | Clorf150      | -0.604708563  |
| ILMN_3252862 | DNFZp667F0711 | -0.6047268    |
| ILMN_1676955 | TYK2          | -0.604952383  |
| ILMN_1684885 | KRTAP4-8      | -0.604953301  |
| ILMN_1793655 | RPGDP         | -0.605172982  |
| ILMN_1888159 | RAMP1B        | -0.605352225  |
| ILMN_1751839 | RUNX3         | -0.605366341  |
| ILMN_1781980 | CFC1B         | -0.605404394  |
| ILMN_1811599 | OR5286        | -0.605432321  |
| ILMN_3204346 | FAM196B       | -0.605560125  |
| ILMN_1798827 | SRRD1         | -0.605574945  |
| ILMN_1638148 | PRICKLE2      | -0.605615066  |
| ILMN_1723969 | PLCB1         | -0.605705571  |
| ILMN_1674458 | KLHL7         | -0.605739029  |
| ILMN_2050109 | GABARAP       | -0.605786396  |
| ILMN_3303965 | ZC3H11A       | -0.605895036  |
| ILMN_1689001 | CD4           | -0.605923367  |
| ILMN_1670172 | WDR33         | -0.60609004   |
| ILMN_3310446 | MIR217        | -0.606134174  |
| ILMN_3269076 | NA            | -0.606148305  |
| ILMN_1773073 | PHYH          | -0.606174475  |
| ILMN_1803021 | AX746755      | -0.606354576  |
| ILMN_1697741 | CR610B63      | -0.60636129   |
| ILMN_3244566 | TSTD1         | -0.60643817   |
| ILMN_1806078 | UBE2E1        | -0.606526246  |
| ILMN_2341815 | TFG           | -0.606541578  |
| ILMN_3227600 | ZNF385B       | -0.60665051   |
| ILMN_1706687 | KLHL5         | -0.606783126  |
| ILMN_2020240 | CHPT1         | -0.6068974967 |
| ILMN_1801443 | TSUJ1         | -0.607011833  |
| ILMN_2213247 | SPCS2         | -0.607097539  |
| ILMN_2213146 | NUDT21        | -0.60714731   |
| ILMN_3294612 | LOC100132831  | -0.607155144  |
| ILMN_3251648 | AQP7P1        | -0.607172791  |
| ILMN_1675018 | IGCF4         | -0.607229688  |
| ILMN_1627828 | KRTAP22-1     | -0.607363652  |
| ILMN_1842602 | AW594636      | -0.607381963  |
| ILMN_1772728 | FAM75A5       | -0.607416157  |
| ILMN_1834323 | LOC151171     | -0.607427345  |
| ILMN_1659894 | SLC25A26      | -0.607584599  |
| ILMN_1727458 | HDC1          | -0.60763861   |
| ILMN_1739872 | ADAMTS18      | -0.607906772  |
| ILMN_2047814 | NPYSR         | -0.608071152  |
| ILMN_3273383 | AY461701      | -0.608127369  |
| ILMN_3270542 | UCRFS1        | -0.608248654  |
| ILMN_1733341 | LOC646851     | -0.608399551  |
| ILMN_1789808 | C11orf85      | -0.60851972   |
| ILMN_1808084 | AARS4345      | -0.608646688  |
| ILMN_1710758 | RNF20         | -0.608675358  |
| ILMN_1719455 | CRIP3         | -0.608694921  |
| ILMN_1696512 | AHSP          | -0.608823965  |
| ILMN_2096985 | ALDH6A1       | -0.608986505  |
| ILMN_1658684 | ATP9B         | -0.608991108  |
| ILMN_1706783 | TAGLN         | -0.609005245  |
| ILMN_1655906 | FBXW7         | -0.609007119  |
| ILMN_1741219 | RRA6B         | -0.609053611  |
| ILMN_1758680 | AK127725      | -0.609096148  |
| ILMN_1758196 | LOC619207     | -0.609299966  |
| ILMN_2182019 | SYN3          | -0.609314863  |
| ILMN_1676075 | KLHL12        | -0.609374953  |
| ILMN_1703475 | CLSPN         | -0.609467195  |
| ILMN_1742889 | WDR77         | -0.609616534  |
| ILMN_1782384 | SPRYD5        | -0.609653447  |
| ILMN_1775814 | GHR           | -0.609699363  |
| ILMN_2393994 | CSPP1         | -0.610117052  |
| ILMN_2196097 | PPP2CA        | -0.610219034  |
| ILMN_3243519 | LOC390858     | -0.610301244  |
| ILMN_1781481 | NA            | -0.610418008  |
| ILMN_3244286 | TANC2         | -0.610514734  |
| ILMN_1838575 | RXNP4949      | -0.610619777  |
| ILMN_1717935 | SPY1          | -0.610804615  |
| ILMN_1777990 | FAM21B        | -0.610985258  |
| ILMN_1721680 | LOC644075     | -0.611084045  |
| ILMN_1718971 | TTCTB         | -0.611209488  |
| ILMN_3249336 | EYS           | -0.611212709  |
| ILMN_3185020 | AIB3420       | -0.611281399  |
| ILMN_2117156 | LRRRC40       | -0.611406186  |

|              |           |             |
|--------------|-----------|-------------|
| ILMN_2053921 | CAPZB     | 0.470374088 |
| ILMN_3240420 | USP18     | 0.470296977 |
| ILMN_1738821 | GOLGA2    | 0.47017019  |
| ILMN_2401436 | PMM1T1    | 0.47008553  |
| ILMN_1790534 | MAP2K3    | 0.46982654  |
| ILMN_1725071 | CCDC12    | 0.469767069 |
| ILMN_1731180 | EXO2C     | 0.469696705 |
| ILMN_1690035 | FLYWCH1   | 0.46969361  |
| ILMN_1745356 | CXCL9     | 0.469545851 |
| ILMN_1815043 | HRRF52    | 0.46951194  |
| ILMN_1718898 | HOKC9     | 0.469166293 |
| ILMN_1802397 | GNAA1     | 0.469155385 |
| ILMN_2077952 | GALNTL1   | 0.469030402 |
| ILMN_1671046 | HSPB2     | 0.468888789 |
| ILMN_1737520 | ZDHH1C15  | 0.468889693 |
| ILMN_2191402 | HCLS      | 0.468889484 |
| ILMN_1759232 | IRS1      | 0.468889672 |
| ILMN_1720024 | IL11RA    | 0.468677984 |
| ILMN_1744239 | FEM1B     | 0.468674348 |
| ILMN_1658110 | TM4SF19   | 0.468665886 |
| ILMN_3211199 | ZNF316    | 0.468658618 |
| ILMN_1668979 | DNAI1B4   | 0.468471344 |
| ILMN_1729611 | REEP4     | 0.468418144 |
| ILMN_1651949 | SCYL3     | 0.468384948 |
| ILMN_1772537 | SCTR      | 0.468312738 |
| ILMN_1679729 | SYPL2     | 0.468253222 |
| ILMN_1694530 | DDA1      | 0.468249975 |
| ILMN_2094396 | LRRORC    | 0.468017771 |
| ILMN_1705447 | AFG3L1    | 0.46803022  |
| ILMN_1670378 | FAM115A   | 0.467981101 |
| ILMN_1714335 | RDH10     | 0.467927954 |
| ILMN_2246328 | P1PND2    | 0.46787323  |
| ILMN_1910908 | SC2B5162  | 0.467802175 |
| ILMN_3282587 | H3F3A     | 0.467765952 |
| ILMN_2334080 | TNNT3     | 0.467743888 |
| ILMN_3271300 | NA        | 0.467654402 |
| ILMN_1658526 | RYK       | 0.467631966 |
| ILMN_1700183 | APLN      | 0.467629316 |
| ILMN_1655377 | P4K4      | 0.467599105 |
| ILMN_2413318 | C15orf157 | 0.46758674  |
| ILMN_2392818 | RTKN      | 0.467514782 |
| ILMN_2219466 | APOBEC3A  | 0.467438211 |
| ILMN_1718808 | AKAP10    | 0.467284708 |
| ILMN_1746090 | SITF3A    | 0.467264334 |
| ILMN_1743456 | ZCCN1C4   | 0.46722998  |
| ILMN_1810531 | DRC2      | 0.467194362 |
| ILMN_1695422 | NCL       | 0.467126139 |
| ILMN_2389218 | CDK18     | 0.467113279 |
| ILMN_1716218 | RP96A2    | 0.467021581 |
| ILMN_2341838 | NP7       | 0.4669999   |
| ILMN_2323446 | PABPC112B | 0.466978422 |
| ILMN_2348093 | ATP5J     | 0.466888302 |
| ILMN_2145050 | POM121    | 0.466793529 |
| ILMN_1677273 | TH        | 0.466772951 |
| ILMN_1758487 | CNPY4     | 0.466706641 |
| ILMN_1683811 | TNPO3     | 0.466651982 |
| ILMN_1768488 | TERF2     | 0.466641103 |
| ILMN_1805522 | KLHL31    | 0.466628599 |
| ILMN_1689029 | WDR7      | 0.466627333 |
| ILMN_1680948 | LMOD1     | 0.466634322 |
| ILMN_1757176 | EIF2B1    | 0.466289803 |
| ILMN_2305405 | HNRNP9    | 0.466165735 |
| ILMN_1809173 | LOC349114 | 0.466119182 |
| ILMN_1755926 | DBI       | 0.466071378 |
| ILMN_2339168 | LOC645332 | 0.466066812 |
| ILMN_1759948 | RNF5      | 0.466034427 |
| ILMN_3240370 | CL1orf83  | 0.465990278 |
| ILMN_2252246 | DNAJC28   | 0.46597117  |
| ILMN_2324202 | GABRE     | 0.465854116 |
| ILMN_1656073 | MYL12A    | 0.465826038 |
| ILMN_1683792 | LAP3      | 0.465814484 |
| ILMN_2380588 | C6orf108  | 0.465801926 |
| ILMN_1688625 | AIM1      | 0.46578456  |
| ILMN_1759312 | AMPD1     | 0.465682339 |
| ILMN_2373566 | PJAL      | 0.465461571 |
| ILMN_2078599 | ACPS      | 0.465441991 |
| ILMN_1669523 | FOS       | 0.465385768 |
| ILMN_2273902 | ZAN       | 0.465283734 |
| ILMN_1810915 | FAAH      | 0.465174569 |
| ILMN_1746529 | RNF2      | 0.465173843 |
| ILMN_1694126 | KIF24     | 0.465069355 |
| ILMN_1905564 | AWO44692  | 0.464821078 |
| ILMN_1809895 | FNBP1L    | 0.464811494 |
| ILMN_2301722 | POE8B     | 0.464788472 |
| ILMN_3302177 | RPL14     | 0.464779803 |
| ILMN_1801226 | DCC6      | 0.464695186 |
| ILMN_2368617 | FKRP      | 0.4646285   |
| ILMN_3243441 | EEF1A1    | 0.464469898 |
| ILMN_1704342 | UBE3C     | 0.464429326 |
| ILMN_1705697 | LANCL1    | 0.464404233 |
| ILMN_1716821 | GORASP1   | 0.464340367 |
| ILMN_3245748 | NCOB1     | 0.464166375 |
| ILMN_1745256 | CXOC5     | 0.46407019  |
| ILMN_1714600 | NAV3      | 0.464056819 |
| ILMN_1760207 | WAS       | 0.464009513 |
| ILMN_1804812 | ANAPC1    | 0.463779116 |
| ILMN_1726928 | TCEA3     | 0.463651086 |
| ILMN_1687101 | VCAN      | 0.46367043  |

|              |              |               |
|--------------|--------------|---------------|
| ILMN_1711139 | VP537A       | -0.611436682  |
| ILMN_1800786 | PARG         | -0.610688334  |
| ILMN_1753877 | MYADM12      | -0.611802066  |
| ILMN_1780576 | LFP91        | -0.612015681  |
| ILMN_3241848 | MIR3647      | -0.61202019   |
| ILMN_1745132 | GDF11        | -0.61232127   |
| ILMN_1665205 | ZNF260       | -0.612364425  |
| ILMN_1685493 | TMCC3        | -0.612403923  |
| ILMN_1842850 | AKO2659      | -0.612439105  |
| ILMN_2052383 | R3HDM1       | -0.612455755  |
| ILMN_1709925 | GPR155       | -0.612481682  |
| ILMN_1826521 | BX106259     | -0.612523248  |
| ILMN_2262462 | C19orf29     | -0.612580789  |
| ILMN_2406468 | NFU1         | -0.612637715  |
| ILMN_1706441 | UPK3B        | -0.612674962  |
| ILMN_3245474 | KIAA1430     | -0.61274101   |
| ILMN_3311075 | MIR1915      | -0.612758928  |
| ILMN_1775467 | OR2T12       | -0.612808277  |
| ILMN_1664921 | PPP6C        | -0.612921376  |
| ILMN_2293758 | AKAP11       | -0.613054211  |
| ILMN_1870097 | AWF61143     | -0.613058852  |
| ILMN_1783333 | C16orf61     | -0.613127137  |
| ILMN_1781791 | PRRG1        | -0.613147613  |
| ILMN_2391141 | UBE3A        | -0.613291756  |
| ILMN_2073289 | MTSS1        | -0.613325118  |
| ILMN_1763730 | APPL1        | -0.613388222  |
| ILMN_3246511 | VNDE         | -0.613402933  |
| ILMN_1722496 | ORAL1        | -0.613647663  |
| ILMN_1811555 | C9orf119     | -0.613761323  |
| ILMN_1806052 | UNC119       | -0.614059211  |
| ILMN_1757165 | LMBR1L       | -0.614130564  |
| ILMN_2084043 | TCEA7        | -0.614184997  |
| ILMN_2187180 | PDP1         | -0.614219648  |
| ILMN_1763875 | NCRNA00083   | -0.614336441  |
| ILMN_1866389 | BQ182905     | -0.61433752   |
| ILMN_1683146 | FTH1         | -0.614584143  |
| ILMN_1731175 | XKR6         | -0.614920636  |
| ILMN_3230215 | TOX2         | -0.615030845  |
| ILMN_1796254 | ACTR10       | -0.615113053  |
| ILMN_1747466 | BQ188360     | -0.615224168  |
| ILMN_1703006 | MTCH1        | -0.615449982  |
| ILMN_1717094 | ZNF618       | -0.615646905  |
| ILMN_1688455 | KIAO564      | -0.615653006  |
| ILMN_2166543 | DNAJC6       | -0.615697984  |
| ILMN_1789387 | KCHNE1       | -0.616031159  |
| ILMN_2376133 | KIAA1191     | -0.6160083074 |
| ILMN_2220187 | GPPT1        | -0.616135482  |
| ILMN_1680220 | GEN1         | -0.616388352  |
| ILMN_1800512 | C20orf90     | -0.616393807  |
| ILMN_1754795 | FAT1         | -0.616497043  |
| ILMN_2161556 | C12orf49     | -0.616491946  |
| ILMN_3239881 | PRSS36       | -0.616515835  |
| ILMN_1853631 | BX115738     | -0.616522983  |
| ILMN_3249291 | F2           | -0.616552384  |
| ILMN_1868646 | BCO31092     | -0.616616951  |
| ILMN_3199608 | LOC28332     | -0.616669047  |
| ILMN_1709378 | SLC20A5      | -0.616709077  |
| ILMN_1686152 | GGA2         | -0.616712152  |
| ILMN_3275637 | NA           | -0.616749354  |
| ILMN_1781669 | PTH          | -0.616818921  |
| ILMN_1744709 | DIG5         | -0.61691979   |
| ILMN_1661651 | FAM138F      | -0.616943117  |
| ILMN_1730432 | IGSF8        | -0.616952961  |
| ILMN_1740418 | CYP27B1      | -0.617066574  |
| ILMN_3260017 | HNRNPK       | -0.617080625  |
| ILMN_1857768 | SRCIN1       | -0.617084777  |
| ILMN_2230592 | MIRP3        | -0.617239355  |
| ILMN_1729563 | UGW          | -0.617273718  |
| ILMN_1772663 | ANKLE2       | -0.617428096  |
| ILMN_2129309 | SEC23A       | -0.617486775  |
| ILMN_1695395 | XYLT1        | -0.61749004   |
| ILMN_1791466 | HMGBl        | -0.617584617  |
| ILMN_3261449 | LOC100130815 | -0.617685758  |
| ILMN_1767674 | HACD2        | -0.617697931  |
| ILMN_1733851 | DACT3        | -0.617741536  |
| ILMN_215317  | CYP4X1       | -0.61782381   |
| ILMN_2111323 | PDCD6IP      | -0.617958914  |
| ILMN_1765287 | DPY19L3      | -0.617980405  |
| ILMN_1761112 | PORCN        | -0.617981285  |
| ILMN_3308981 | MIR158A1     | -0.618008219  |
| ILMN_1651254 | KIF2         | -0.618205763  |
| ILMN_1707314 | PAX3         | -0.618225736  |
| ILMN_2117736 | MGAT4C       | -0.618297938  |
| ILMN_1794767 | OR52N5       | -0.618614929  |
| ILMN_1803160 | RTEL1        | -0.61862746   |
| ILMN_1721922 | NAB2         | -0.618642193  |
| ILMN_1675687 | NA           | -0.618645791  |
| ILMN_1694514 | ZDHHC11      | -0.618683637  |
| ILMN_1764609 | PWWP2B       | -0.618772007  |
| ILMN_1685228 | RHOXF28      | -0.618905384  |
| ILMN_1770172 | ZNF469       | -0.619048951  |
| ILMN_1693145 | BLUB3        | -0.619079242  |
| ILMN_1721921 | BLMH         | -0.619217373  |
| ILMN_1703886 | SLC16A2      | -0.619330504  |
| ILMN_3234735 | ER12         | -0.619390768  |
| ILMN_1774476 | TCTE1D4      | -0.619423655  |
| ILMN_1666033 | NPF3         | -0.619494939  |
| ILMN_1786050 | RBBP9        | -0.619558647  |

|              |              |              |
|--------------|--------------|--------------|
| ILMN_1699206 | FHDC1        | 0.463632002  |
| ILMN_1668752 | C19orf60     | 0.463627571  |
| ILMN_1792242 | C6orf44      | 0.463627202  |
| ILMN_1735438 | GPMB8        | 0.463614821  |
| ILMN_1680618 | MYC          | 0.463531379  |
| ILMN_3246005 | KDM5B        | 0.463510041  |
| ILMN_2350634 | EFEMP1       | 0.463480741  |
| ILMN_1768598 | LAIR1        | 0.46345052   |
| ILMN_1692973 | RICD1        | 0.463319758  |
| ILMN_1719123 | CKX          | 0.463317513  |
| ILMN_1709227 | CCDC84       | 0.463124951  |
| ILMN_2395375 | GABBR1       | 0.463076659  |
| ILMN_3245314 | FAM176B      | 0.463073737  |
| ILMN_2347949 | GPDD         | 0.463062136  |
| ILMN_2478170 | LOC441455    | 0.463048454  |
| ILMN_1745826 | KATNAL2      | 0.463034206  |
| ILMN_1903565 | GNA11        | 0.462944974  |
| ILMN_1665107 | ITGB1BP1     | 0.46293471   |
| ILMN_1798172 | IPO4         | 0.462793374  |
| ILMN_1691151 | CHKA         | 0.462676825  |
| ILMN_1687546 | HSP90AA1     | 0.462623466  |
| ILMN_1781897 | KLRK3        | 0.462457513  |
| ILMN_1696657 | LRRN2        | 0.462444852  |
| ILMN_2402079 | ZMIZ2        | 0.462442299  |
| ILMN_1799667 | KIF4A        | 0.462438315  |
| ILMN_2323508 | AIF1L        | 0.462277072  |
| ILMN_2351110 | PTGER3       | 0.462230019  |
| ILMN_1680070 | MUC6         | 0.462192318  |
| ILMN_1789502 | GPC4         | 0.462064654  |
| ILMN_1804306 | LYPLA2       | 0.462046817  |
| ILMN_1775930 | PNLIPRP1     | 0.462026047  |
| ILMN_2341793 | CTCY         | 0.461836907  |
| ILMN_2351379 | SLC35E1      | 0.461827491  |
| ILMN_2414679 | SFI1         | 0.461824856  |
| ILMN_1811616 | EEP1         | 0.461799949  |
| ILMN_1705107 | SDCBP2       | 0.461743474  |
| ILMN_1701308 | COL1A1       | 0.461741168  |
| ILMN_1652677 | FAM89A       | 0.461707895  |
| ILMN_3241884 | SNORD5A      | 0.461676922  |
| ILMN_2348243 | STRADA       | 0.461615534  |
| ILMN_1731178 | ARHGAP28     | 0.461533723  |
| ILMN_2052790 | NONO         | 0.461523551  |
| ILMN_1789358 | ZNF628       | 0.461415454  |
| ILMN_1779190 | ALKBH8       | 0.46131252   |
| ILMN_2242345 | LRAL2        | 0.461203141  |
| ILMN_1661490 | PFDN6        | 0.461060875  |
| ILMN_1799120 | WFDX2        | 0.46102565   |
| ILMN_2315964 | PSRC1        | 0.46089318   |
| ILMN_2326381 | MXR8         | 0.46089156   |
| ILMN_1790461 | C6orf125     | 0.460885337  |
| ILMN_3241237 | RNF208       | 0.460880256  |
| ILMN_1683328 | IP6K2        | 0.46077479   |
| ILMN_1742923 | ZNF584       | 0.460758874  |
| ILMN_1700428 | HLA-DQB      | 0.46074874   |
| ILMN_1651278 | SNIP1        | 0.460716101  |
| ILMN_2355462 | C17orf1      | 0.460654931  |
| ILMN_2129015 | AFI1         | 0.4606031717 |
| ILMN_1657235 | PALM3        | 0.460628645  |
| ILMN_1855286 | C6orf204     | 0.460493795  |
| ILMN_2089340 | FAM127B      | 0.46042043   |
| ILMN_1804884 | C22orf39     | 0.46039959   |
| ILMN_1662340 | ZNF558       | 0.460315288  |
| ILMN_1684591 | ZNF434       | 0.460303635  |
| ILMN_1673884 | GEMIN7       | 0.460197359  |
| ILMN_1687821 | C16orf45     | 0.460093496  |
| ILMN_1707710 | SLC6A13      | 0.460021814  |
| ILMN_1683692 | LRCH1        | 0.460007563  |
| ILMN_1794132 | NDUF58       | 0.459993941  |
| ILMN_3238680 | C7orf55      | 0.459751292  |
| ILMN_2292517 | EEF1E1-MUTED | 0.45970228   |
| ILMN_2227195 | CDC65        | 0.459489208  |
| ILMN_1766675 | CDH6         | 0.459483544  |
| ILMN_2413622 | RFX4         | 0.459446972  |
| ILMN_1750153 | ORC3A1       | 0.459331646  |
| ILMN_1805481 | TRMT11       | 0.459315121  |
| ILMN_3238676 | ULBP2        | 0.459293854  |
| ILMN_1792400 | CSN3         | 0.459293735  |
| ILMN_2201678 | FSTL1        | 0.459255265  |
| ILMN_2347139 | C17orf96     | 0.459190881  |
| ILMN_1742872 | URB2         | 0.459093753  |
| ILMN_3240301 | TOMM40       | 0.459068361  |
| ILMN_3246560 | EMB          | 0.459017197  |
| ILMN_1745655 | PEX16        | 0.45897321   |
| ILMN_2145914 | FAM153A      | 0.458942741  |
| ILMN_1767129 | POLR1C       | 0.458888028  |
| ILMN_1732375 | EFSEC        | 0.458855797  |
| ILMN_1723185 | ELOF1        | 0.458774782  |
| ILMN_1724148 | ORA1         | 0.458665186  |
| ILMN_2339705 | MED8         | 0.458666039  |
| ILMN_2383484 | C19orf48     | 0.458576108  |
| ILMN_1731475 | ADH1D1       | 0.458468899  |
| ILMN_1792168 | GALE         | 0.458466091  |
| ILMN_1798204 | IL21R        | 0.458358194  |
| ILMN_1789913 | SMPDL3B      | 0.458293124  |
| ILMN_1790741 | RNF126       | 0.458158688  |
| ILMN_2123871 | TMEM18       | 0.458136739  |
| ILMN_1699172 | AFC3L1       | 0.458037936  |
| ILMN_1761519 | EIF4G2       | 0.457996177  |

|              |              |              |
|--------------|--------------|--------------|
| ILMN_1795304 | CRLF2        | -0.619624165 |
| ILMN_2223720 | ATMIN        | -0.619650815 |
| ILMN_1693410 | BR3BP1       | -0.619702079 |
| ILMN_1698673 | EFCAB7       | -0.619746121 |
| ILMN_2076567 | UBE2V2       | -0.619780215 |
| ILMN_1815658 | C3orf78      | -0.619869413 |
| ILMN_1673950 | FAM47E-STBD1 | -0.619883985 |
| ILMN_1718253 | TAS2R3       | -0.619889021 |
| ILMN_1803611 | SNAPC3       | -0.619957826 |
| ILMN_1804900 | A4EBT722     | -0.619989022 |
| ILMN_1732374 | ATAD5        | -0.619999203 |
| ILMN_2385672 | ELN          | -0.620029955 |
| ILMN_1687751 | BAALC        | -0.620157648 |
| ILMN_1840316 | BCD64139     | -0.620387556 |
| ILMN_1695519 | PRKG1        | -0.620392628 |
| ILMN_2197238 | DEFB122      | -0.620458612 |
| ILMN_1659270 | OTP          | -0.620532007 |
| ILMN_1714364 | PTK2         | -0.620658056 |
| ILMN_1709204 | CLECGA       | -0.620753683 |
| ILMN_1689156 | MMAB         | -0.621131872 |
| ILMN_1670547 | GRM1         | -0.621273653 |
| ILMN_1820505 | AA435525     | -0.621263557 |
| ILMN_2227817 | GSTA3        | -0.621417886 |
| ILMN_1736888 | SAR1B        | -0.621708112 |
| ILMN_1722056 | ATP7B        | -0.621780799 |
| ILMN_1825529 | BXO93041     | -0.621784653 |
| ILMN_1746226 | TFE3         | -0.621809651 |
| ILMN_1815442 | AKO2A148     | -0.622035968 |
| ILMN_2351241 | RNF14        | -0.622040756 |
| ILMN_1738849 | SLC9A2       | -0.622184236 |
| ILMN_2110094 | CF1C         | -0.62220565  |
| ILMN_1748007 | KREMEN1      | -0.622298944 |
| ILMN_1844882 | RGD4020      | -0.622431876 |
| ILMN_2147402 | UBE2X        | -0.622575192 |
| ILMN_3302625 | DA626616     | -0.622587454 |
| ILMN_1779279 | MAP3IP1L     | -0.622664047 |
| ILMN_1681558 | KRTAP1-5     | -0.622871621 |
| ILMN_1836218 | LOC25845     | -0.622918113 |
| ILMN_1752469 | ALP          | -0.622922046 |
| ILMN_1782798 | MDFI         | -0.622971903 |
| ILMN_1804283 | GNA5         | -0.623119164 |
| ILMN_2120360 | LOC729164    | -0.623330464 |
| ILMN_2302632 | HFE          | -0.623333421 |
| ILMN_1687948 | CF           | -0.623351603 |
| ILMN_1738736 | SNX4         | -0.623404047 |
| ILMN_3260715 | CRTC3        | -0.623498877 |
| ILMN_1656111 | MYLIP        | -0.62361856  |
| ILMN_1750940 | SLITRK1      | -0.624019657 |
| ILMN_1683231 | FAM83F       | -0.624030584 |
| ILMN_1740526 | ALC2K        | -0.624054157 |
| ILMN_1900929 | OR7E12P      | -0.624121943 |
| ILMN_3235231 | SNORA49      | -0.624255086 |
| ILMN_2267131 | MAGEA11      | -0.624269664 |
| ILMN_1760542 | PSMA1        | -0.624306264 |
| ILMN_1769556 | NPR3         | -0.624338246 |
| ILMN_1686473 | ATP9D1H      | -0.624342012 |
| ILMN_1767690 | SENP8        | -0.62457379  |
| ILMN_1818620 | AW314478     | -0.624597146 |
| ILMN_2387680 | VNN3         | -0.62475693  |
| ILMN_1671621 | PCMT1        | -0.624781238 |
| ILMN_1780141 | TMEM66       | -0.624843119 |
| ILMN_1793203 | SMKRP1       | -0.624879044 |
| ILMN_3238143 | DZHGDH       | -0.624940808 |
| ILMN_1697922 | KIAA1109     | -0.625023584 |
| ILMN_1764361 | DUSP16       | -0.625057808 |
| ILMN_1726359 | NECAP1       | -0.625079271 |
| ILMN_2289398 | ECM2         | -0.625247818 |
| ILMN_1666939 | MEI1         | -0.625281424 |
| ILMN_1805024 | ERBB2IP      | -0.625367443 |
| ILMN_2111187 | ELOVL6       | -0.625441968 |
| ILMN_1893466 | AW293663     | -0.625553739 |
| ILMN_1697118 | ARMCG        | -0.625569762 |
| ILMN_1655261 | ERP27        | -0.625592558 |
| ILMN_1794187 | FBL3         | -0.62570302  |
| ILMN_1683903 | PDPK1        | -0.625707287 |
| ILMN_1716591 | SPRRI1A      | -0.625749967 |
| ILMN_1699724 | NA           | -0.625812502 |
| ILMN_2142117 | LYPLA11      | -0.626055303 |
| ILMN_1798870 | RBP1L        | -0.626162907 |
| ILMN_1658302 | P4A2         | -0.626243684 |
| ILMN_1724902 | SLC22A18     | -0.6263101   |
| ILMN_1847202 | AW173314     | -0.626313541 |
| ILMN_1672605 | C7orf41      | -0.626344369 |
| ILMN_1811029 | TLK1         | -0.626466525 |
| ILMN_3305675 | PRAMEF11     | -0.626465725 |
| ILMN_1666306 | SROD         | -0.626484654 |
| ILMN_1708508 | PPM1E        | -0.62672036  |
| ILMN_1744517 | GNS          | -0.626783978 |
| ILMN_1916599 | LOC100133985 | -0.626852345 |
| ILMN_1762151 | PLK5         | -0.627074526 |
| ILMN_1803850 | BXO9731      | -0.627181798 |
| ILMN_1911344 | AV650212     | -0.627231035 |
| ILMN_1702764 | MARCH5       | -0.627381527 |
| ILMN_1831098 | BXO92776     | -0.627408301 |
| ILMN_1878019 | DOX6         | -0.627569302 |
| ILMN_1728657 | VCC3B        | -0.627598747 |
| ILMN_1762021 | TBM4B        | -0.627676744 |
| ILMN_1687437 | CCDC57       | -0.627703013 |

|              |              |              |
|--------------|--------------|--------------|
| ILMN_2218856 | CCL3L3       | 0.457955512  |
| ILMN_3236156 | OSTC         | 0.457888017  |
| ILMN_1721580 | TBKX13       | 0.457856989  |
| ILMN_2054576 | EPADONL      | 0.457838823  |
| ILMN_1745469 | SEC24B       | 0.457799775  |
| ILMN_2249920 | FYN          | 0.457745052  |
| ILMN_1815012 | EXOC7        | 0.457725715  |
| ILMN_1810856 | HDAOC5       | 0.457696899  |
| ILMN_1660303 | TMEM129      | 0.45767132   |
| ILMN_1671483 | EXOC1        | 0.457631799  |
| ILMN_1698213 | RBM3         | 0.457590194  |
| ILMN_1801633 | ROMO1        | 0.457557309  |
| ILMN_2080684 | IQCA1        | 0.457503224  |
| ILMN_2388965 | ARHGFE25     | 0.457444348  |
| ILMN_2368008 | MPZL1        | 0.457301489  |
| ILMN_3307483 | MCE2L        | 0.457152981  |
| ILMN_1740487 | CMTM7        | 0.457134918  |
| ILMN_1763328 | GZF1         | 0.456961327  |
| ILMN_1689560 | C14orf181    | 0.45690569   |
| ILMN_1705594 | NAT10        | 0.4568817072 |
| ILMN_2410449 | PCDH4B       | 0.456808366  |
| ILMN_1787127 | SLC3A2       | 0.456792318  |
| ILMN_1782389 | LAD1         | 0.456717106  |
| ILMN_1780756 | RBM23        | 0.456620547  |
| ILMN_1682037 | FBX18        | 0.456588764  |
| ILMN_2126338 | STMN2        | 0.456539665  |
| ILMN_1706913 | ADAR         | 0.456445649  |
| ILMN_1708064 | MAP4         | 0.456404298  |
| ILMN_2266573 | SLC12A6      | 0.456277708  |
| ILMN_1750145 | YWHAG        | 0.456187584  |
| ILMN_1795865 | FGFR1L1      | 0.456137322  |
| ILMN_1706268 | PIGGOR       | 0.456111198  |
| ILMN_1710402 | AP2P         | 0.456033576  |
| ILMN_1878016 | AAB83754     | 0.456030945  |
| ILMN_1805027 | KLC3         | 0.456008993  |
| ILMN_1691787 | RAPH1        | 0.4558216    |
| ILMN_1804316 | TCAP         | 0.455727356  |
| ILMN_2386235 | FAM66A       | 0.45572456   |
| ILMN_1797370 | C2orf56      | 0.455651775  |
| ILMN_1714413 | MARCKSL1     | 0.455561396  |
| ILMN_1672611 | CDH11        | 0.455531323  |
| ILMN_1773066 | CDKN2AIP     | 0.455444038  |
| ILMN_1714691 | HOXD10       | 0.455431272  |
| ILMN_1698139 | TCEAL1       | 0.455411583  |
| ILMN_1803788 | GALX3        | 0.455313377  |
| ILMN_2324997 | MAP7D1       | 0.455078367  |
| ILMN_3288018 | LOC645323    | 0.455047001  |
| ILMN_1754235 | SLC35C2      | 0.455010218  |
| ILMN_2251225 | WDR78        | 0.45488833   |
| ILMN_1769229 | SLC1A1       | 0.454875583  |
| ILMN_1769227 | CDCA25E1     | 0.454747731  |
| ILMN_2227573 | GSTO1        | 0.45466106   |
| ILMN_2188333 | CD69         | 0.454600475  |
| ILMN_1760305 | FBRSL1       | 0.454474018  |
| ILMN_1738578 | FILIP1L      | 0.454469981  |
| ILMN_1750459 | ANKRD36      | 0.45444701   |
| ILMN_1766408 | CFB8         | 0.454258151  |
| ILMN_3266197 | NA           | 0.454233866  |
| ILMN_1842582 | TTCC9C       | 0.454204496  |
| ILMN_3244483 | RNF216L      | 0.454188269  |
| ILMN_2095273 | XIAA407      | 0.45407177   |
| ILMN_1783846 | RAP1H        | 0.453963051  |
| ILMN_1666222 | PHACTR3      | 0.453896134  |
| ILMN_2276688 | DIXDC1       | 0.453761235  |
| ILMN_1739236 | ZNF668       | 0.453740441  |
| ILMN_1730685 | MRLP16       | 0.453702676  |
| ILMN_2296028 | GRP173       | 0.453701378  |
| ILMN_2372040 | HITFP1       | 0.453697202  |
| ILMN_1662390 | ASPM1D       | 0.453680573  |
| ILMN_1778625 | CD44         | 0.453672298  |
| ILMN_1657683 | C1orf198     | 0.453574021  |
| ILMN_1773154 | NFKBIA       | 0.453569521  |
| ILMN_170124  | GET4         | 0.45352737   |
| ILMN_1728435 | C12orf45     | 0.453517918  |
| ILMN_3247965 | DCS94366     | 0.453486636  |
| ILMN_1712887 | SLC10A3      | 0.453463088  |
| ILMN_2253759 | IL18BP       | 0.453428118  |
| ILMN_1677002 | LOC644083    | 0.453284703  |
| ILMN_2235556 | DCS94366     | 0.453182785  |
| ILMN_2307926 | ADBRK1       | 0.45317854   |
| ILMN_1763478 | AK130343     | 0.453105179  |
| ILMN_1808939 | RP56         | 0.453042324  |
| ILMN_1789086 | LOC100288069 | 0.453009053  |
| ILMN_1778587 | PPP2R2D      | 0.452992957  |
| ILMN_1740005 | SERPINF2     | 0.452989688  |
| ILMN_1673229 | TNNDCC11     | 0.452967982  |
| ILMN_1777853 | MBOAT2       | 0.452852999  |
| ILMN_1688480 | CEND1        | 0.452528659  |
| ILMN_1745784 | ZNF324       | 0.452343551  |
| ILMN_1797544 | HYDIN        | 0.452304476  |
| ILMN_1820845 | NA           | 0.45217338   |
| ILMN_2110829 | RPL23A       | 0.452121336  |
| ILMN_1711990 | DEFB135      | 0.451942041  |
| ILMN_1695432 | TPST2        | 0.451902668  |
| ILMN_2188264 | CYR61        | 0.451805842  |
| ILMN_1712390 | CUTA         | 0.451702463  |
| ILMN_1830984 | BP509118     | 0.451660918  |
| ILMN_1658955 | EIF4E        | 0.451417652  |

|              |              |              |
|--------------|--------------|--------------|
| ILMN_2403946 | FE22         | -0.627797158 |
| ILMN_3307863 | TADK3        | -0.627949667 |
| ILMN_1749903 | ZNRF2        | -0.627963887 |
| ILMN_1763516 | SPRNC2       | -0.627989548 |
| ILMN_1654759 | WWC2         | -0.628061438 |
| ILMN_1671215 | FBX159       | -0.628112417 |
| ILMN_1682781 | TEAD2        | -0.628125403 |
| ILMN_1659086 | DOB95884     | -0.628153028 |
| ILMN_1661002 | RFXWD2       | -0.628301319 |
| ILMN_1729515 | PHM4         | -0.628389005 |
| ILMN_2066904 | OR4C12       | -0.628623451 |
| ILMN_1715181 | ARRDC2       | -0.628636416 |
| ILMN_1735822 | TTCC30A      | -0.62863791  |
| ILMN_1764871 | PIGP         | -0.628816054 |
| ILMN_1844301 | AAR61199     | -0.628970701 |
| ILMN_1713882 | FBCO11       | -0.629023575 |
| ILMN_3238684 | DEFB116      | -0.629126282 |
| ILMN_1819991 | AT92396      | -0.629202327 |
| ILMN_1695290 | FERM2T2      | -0.629204492 |
| ILMN_1892161 | DB338885     | -0.629232683 |
| ILMN_2352917 | LTBPA        | -0.629294695 |
| ILMN_1696935 | RBM39        | -0.62935627  |
| ILMN_1849726 | AAS26513     | -0.629608105 |
| ILMN_1758104 | PRPS2        | -0.629868632 |
| ILMN_1861414 | BFS93077     | -0.629874058 |
| ILMN_2203768 | PRR15        | -0.629885318 |
| ILMN_1708721 | RABGAFL1     | -0.629893116 |
| ILMN_1759910 | SERPINA5     | -0.629921237 |
| ILMN_2201668 | SLC19A2      | -0.62993226  |
| ILMN_1798043 | LOC39674     | -0.629968998 |
| ILMN_1709247 | PPP2R1B      | -0.630272669 |
| ILMN_1893948 | BX109720     | -0.630240255 |
| ILMN_1680364 | MPP510       | -0.630397728 |
| ILMN_1745904 | CCDC6        | -0.630421374 |
| ILMN_1808305 | RTCD1        | -0.630507774 |
| ILMN_1757504 | REG3A        | -0.630561799 |
| ILMN_3242710 | LOC157627    | -0.63057538  |
| ILMN_1682034 | HEY2         | -0.630670084 |
| ILMN_2325008 | DHMO4        | -0.630707818 |
| ILMN_1781356 | TSC22D3      | -0.630701083 |
| ILMN_1747099 | LUC7L2       | -0.630839944 |
| ILMN_2238795 | NEK3         | -0.631005132 |
| ILMN_2190051 | CCDC91       | -0.631033416 |
| ILMN_2259332 | CDKN2C       | -0.631059171 |
| ILMN_3177350 | WSCD3        | -0.631135935 |
| ILMN_1798886 | NUDT21       | -0.631154191 |
| ILMN_1753856 | ZNF407       | -0.631174276 |
| ILMN_1669393 | GGT1         | -0.631391148 |
| ILMN_1670875 | PPR1D        | -0.63139995  |
| ILMN_1626953 | NA           | -0.631858985 |
| ILMN_1785466 | NAP113       | -0.631623215 |
| ILMN_1793410 | SNTB1        | -0.63166814  |
| ILMN_1783448 | DYNC1L12     | -0.631752677 |
| ILMN_1677440 | ATP6AP2      | -0.631856317 |
| ILMN_1756767 | EIF5B        | -0.631898609 |
| ILMN_1840311 | DA49348      | -0.631897593 |
| ILMN_3310030 | MIR1265      | -0.631914288 |
| ILMN_2343097 | NCALD        | -0.632031872 |
| ILMN_1803110 | TF3B3        | -0.632078177 |
| ILMN_2360054 | DDR1         | -0.632235099 |
| ILMN_1775831 | LOC100287166 | -0.632246955 |
| ILMN_1824490 | RG618056     | -0.632339471 |
| ILMN_1810124 | SGCB         | -0.632439536 |
| ILMN_1813352 | CDH7         | -0.632519004 |
| ILMN_1715437 | CASC5        | -0.6327943   |
| ILMN_1866337 | AKO93987     | -0.632965656 |
| ILMN_2285480 | LBR          | -0.633029175 |
| ILMN_1894480 | RUE5480      | -0.633097828 |
| ILMN_1794466 | VAT1L        | -0.633242721 |
| ILMN_1731521 | TPSY3        | -0.633431486 |
| ILMN_1804490 | LOC100630923 | -0.633659548 |
| ILMN_1706553 | SMG7         | -0.633860726 |
| ILMN_1762360 | THSD7A       | -0.633773025 |
| ILMN_1703850 | FAM90A7      | -0.633789412 |
| ILMN_3251467 | LRRCS8       | -0.633817548 |
| ILMN_3240740 | EIF3L        | -0.633835364 |
| ILMN_2314140 | PAX6         | -0.633892095 |
| ILMN_1699294 | PLEKHA7      | -0.633929044 |
| ILMN_1660775 | TPM3         | -0.633958164 |
| ILMN_2343010 | RGL43        | -0.634023846 |
| ILMN_1795300 | ARHGFE37     | -0.634101134 |
| ILMN_1717180 | MTMR6        | -0.634227827 |
| ILMN_1688663 | IFNA1        | -0.634339189 |
| ILMN_1799328 | SLC30A9      | -0.634465299 |
| ILMN_1754423 | C3orf23      | -0.63461492  |
| ILMN_1810604 | ELMOD1       | -0.634628774 |
| ILMN_3309001 | MIR1-2       | -0.634721119 |
| ILMN_1738818 | RAG1         | -0.634861433 |
| ILMN_1748542 | USH1G        | -0.634899267 |
| ILMN_1685423 | CNTF         | -0.635266533 |
| ILMN_1691466 | YES1         | -0.635332873 |
| ILMN_1673752 | C1orf91      | -0.63550161  |
| ILMN_1803279 | TMED5        | -0.635648275 |
| ILMN_3251269 | SRP14        | -0.635653234 |
| ILMN_1699216 | FLJ45721     | -0.635680045 |
| ILMN_2230566 | RAB40B       | -0.635847552 |
| ILMN_1892973 | RGL1334      | -0.636272718 |
| ILMN_1783709 | RAGA         | -0.636256049 |



|              |          |             |
|--------------|----------|-------------|
| ILMN_1693207 | KIR2DL4  | 0.451335769 |
| ILMN_1670640 | ZNF664   | 0.451328026 |
| ILMN_2325718 | LOC13116 | 0.451292638 |
| ILMN_1718552 | CXCL13   | 0.451277745 |
| ILMN_1748158 | MBNL1    | 0.451195365 |
| ILMN_1781721 | DDX31    | 0.451174027 |
| ILMN_2413527 | VCL      | 0.451164379 |
| ILMN_2299221 | RABGGTA  | 0.451139408 |
| ILMN_2192620 | DCAF15   | 0.450983246 |
| ILMN_1700597 | CMT1A    | 0.450980163 |
| ILMN_1769822 | PLAA     | 0.450942904 |
| ILMN_1701213 | PIP4K2B  | 0.450901367 |
| ILMN_1719641 | SMOC2    | 0.450618935 |
| ILMN_3287219 | NA       | 0.450616154 |
| ILMN_1663562 | CRJ2A2   | 0.450592625 |
| ILMN_1717934 | SYT11    | 0.450473758 |
| ILMN_1794505 | SHEM1    | 0.450420701 |
| ILMN_1757387 | UCHL1    | 0.450410671 |
| ILMN_1786108 | TUT1     | 0.450388486 |
| ILMN_1677603 | CL5      | 0.450361195 |
| ILMN_1866603 | MESP1    | 0.450353106 |
| ILMN_1801934 | SERTAD3  | 0.450348138 |
| ILMN_1707727 | ANGPTL4  | 0.450277072 |
| ILMN_1659888 | PPP1R14B | 0.450237212 |
| ILMN_1725787 | RFK1     | 0.450228384 |
| ILMN_1736255 | AHSG     | 0.450202688 |
| ILMN_3307692 | C2orf50  | 0.450150111 |
| ILMN_2413084 | HSPAR8   | 0.450070148 |
| ILMN_1808114 | LYVE1    | 0.450025942 |
| ILMN_1683179 | RRAD     | 0.450021777 |
| ILMN_2334042 | THY11    | 0.450003335 |
| ILMN_1761782 | RAMP3    | 0.449990588 |
| ILMN_2398627 | TENC1    | 0.449953541 |
| ILMN_1709860 | UNC45A   | 0.449928803 |
| ILMN_1662492 | GDNF     | 0.449845786 |
| ILMN_1854607 | CD673602 | 0.449798714 |
| ILMN_1721842 | RYPB     | 0.449778316 |
| ILMN_1841661 | PHLP1    | 0.449720527 |
| ILMN_2355586 | ATM1     | 0.449716285 |
| ILMN_1727790 | KHDRBS3  | 0.44917612  |
| ILMN_1675602 | MYL9     | 0.449035253 |
| ILMN_1698554 | AACS     | 0.449027961 |
| ILMN_1716026 | ARMCKG   | 0.44900416  |
| ILMN_2374340 | PLAUR    | 0.448992884 |
| ILMN_1730709 | ESG      | 0.448989185 |
| ILMN_3181833 | AF339771 | 0.448926066 |
| ILMN_2324421 | TNFRD1   | 0.448893274 |
| ILMN_1654516 | TMEM120A | 0.448843108 |
| ILMN_1768818 | LRRCA6   | 0.448812259 |
| ILMN_2163070 | KHDRC1   | 0.448807649 |
| ILMN_1658327 | BAZ1A    | 0.448652182 |
| ILMN_2062714 | PTGDR    | 0.448595318 |
| ILMN_1758084 | GLRX3    | 0.448466704 |
| ILMN_1724437 | GCAT     | 0.448448485 |
| ILMN_2308338 | BMP      | 0.448394207 |
| ILMN_1786843 | KCTD13   | 0.448380188 |
| ILMN_2201083 | URE2C    | 0.44834603  |
| ILMN_2274420 | SPTLC1   | 0.448278857 |
| ILMN_1755411 | RBMS2    | 0.448275523 |
| ILMN_2138019 | HEPACAM  | 0.448242411 |
| ILMN_1810374 | TMEM156  | 0.448185335 |
| ILMN_1769412 | RAP2F1   | 0.448157932 |
| ILMN_3204275 | SARNP    | 0.44810152  |
| ILMN_1752299 | RAB6A    | 0.448079171 |
| ILMN_1694400 | MSR1     | 0.447879474 |
| ILMN_1739576 | CV58R2   | 0.447874687 |
| ILMN_2259181 | TBX20    | 0.447794395 |
| ILMN_1814270 | LIG3     | 0.447707612 |
| ILMN_3247728 | RNF515   | 0.447689733 |
| ILMN_1759460 | TAI7     | 0.447649708 |
| ILMN_2071446 | PI15     | 0.447622973 |
| ILMN_1785520 | PRPSK2   | 0.447594454 |
| ILMN_1753432 | SAT1     | 0.447551334 |
| ILMN_1751582 | RAB5B    | 0.447479066 |
| ILMN_1698866 | CTS6     | 0.447335836 |
| ILMN_1767662 | LASS6    | 0.447276442 |
| ILMN_1726578 | ZNF93    | 0.447253459 |
| ILMN_1656670 | HLA-G    | 0.447239698 |
| ILMN_1656662 | RPL24    | 0.447193867 |
| ILMN_1671776 | DFB121   | 0.447181985 |
| ILMN_1684278 | SNORD38A | 0.447136588 |
| ILMN_2408139 | CDC42    | 0.446927372 |
| ILMN_1790962 | RINL     | 0.44691983  |
| ILMN_1710710 | DEDD     | 0.446905608 |
| ILMN_2384561 | TFP2     | 0.446884247 |
| ILMN_1698216 | CLTNR109 | 0.446702738 |
| ILMN_2307903 | VCAM1    | 0.446658421 |
| ILMN_1733107 | NOG4L    | 0.446613497 |
| ILMN_1880280 | AKO25793 | 0.446593257 |
| ILMN_1739441 | GANAB    | 0.446551282 |
| ILMN_1795991 | C22orf28 | 0.446503569 |
| ILMN_1800512 | HMOX1    | 0.446500969 |
| ILMN_1748625 | TCEAL4   | 0.446465295 |
| ILMN_3191861 | NA       | 0.446371082 |
| ILMN_1728677 | CREB5    | 0.446300877 |
| ILMN_1663042 | SOD4     | 0.44619559  |
| ILMN_309417  | IRF44    | 0.446140996 |
| ILMN_1811507 | LBN      | 0.446122219 |

|              |             |               |
|--------------|-------------|---------------|
| ILMN_3241607 | FLJ00326    | -0.636277859  |
| ILMN_1752117 | TMEM55A     | -0.636313173  |
| ILMN_1656424 | SNRPE       | -0.636421075  |
| ILMN_1798837 | PTPN23A     | -0.636464997  |
| ILMN_1863079 | CD45034     | -0.636536566  |
| ILMN_3218529 | AB2         | -0.636684953  |
| ILMN_1670817 | GRPEL1      | -0.636735065  |
| ILMN_1758811 | IMPA1       | -0.636977229  |
| ILMN_2161832 | VP537A      | -0.637054317  |
| ILMN_1803452 | CXCL1       | -0.637174749  |
| ILMN_1748323 | CXCL14      | -0.637398032  |
| ILMN_1651964 | ABCC5       | -0.637453316  |
| ILMN_2207988 | SERPINI1    | -0.637568627  |
| ILMN_1704166 | LNP1        | -0.637570901  |
| ILMN_2080637 | ZBTB44      | -0.637603061  |
| ILMN_1770080 | FAM159B     | -0.637620838  |
| ILMN_1763604 | CACNB1      | -0.637662263  |
| ILMN_1764549 | UBE3A       | -0.63785974   |
| ILMN_1787627 | GPRASP1     | -0.637861256  |
| ILMN_2103774 | PIPSK11     | -0.637960385  |
| ILMN_1803749 | BC10180     | -0.637991224  |
| ILMN_1819665 | AWC29225    | -0.638038533  |
| ILMN_1660321 | CDH24       | -0.638054852  |
| ILMN_1692831 | HIST1H1A    | -0.638061228  |
| ILMN_2384629 | RGS12       | -0.638162902  |
| ILMN_3207098 | C11orf58    | -0.638284836  |
| ILMN_1767070 | VHLB5       | -0.638345011  |
| ILMN_1699411 | GN54        | -0.638263722  |
| ILMN_3225624 | TATDN1      | -0.638323408  |
| ILMN_1687036 | MRPL47      | -0.638542343  |
| ILMN_1734660 | ICAM4       | -0.638645084  |
| ILMN_1671051 | CD276       | -0.638700831  |
| ILMN_2302674 | PKB3        | -0.638731666  |
| ILMN_1738038 | TMMMB       | -0.638950683  |
| ILMN_1801378 | COQ3        | -0.639114514  |
| ILMN_1755792 | STK38L      | -0.639185771  |
| ILMN_2308903 | WFDCC3      | -0.639415112  |
| ILMN_2408815 | NAP111      | -0.639719234  |
| ILMN_1692844 | TRKCD19     | -0.639827716  |
| ILMN_1896277 | BC037739    | -0.63985261   |
| ILMN_1727738 | RAB33B      | -0.639983812  |
| ILMN_1670144 | OR10H2      | -0.640075907  |
| ILMN_1704247 | LAMA3       | -0.640419901  |
| ILMN_1856533 | CDKL2       | -0.640511771  |
| ILMN_1656912 | PTPRB       | -0.640569578  |
| ILMN_2383363 | IMPDH1      | -0.640584885  |
| ILMN_1810785 | RNF11       | -0.640631889  |
| ILMN_1746945 | CSMD1       | -0.64066436   |
| ILMN_1690329 | FAM118B     | -0.640698921  |
| ILMN_1692588 | HEATR6A     | -0.640824744  |
| ILMN_1870747 | BX116001    | -0.640955856  |
| ILMN_1663538 | CLYBL       | -0.641020382  |
| ILMN_1699844 | SCRN3       | -0.641090966  |
| ILMN_1831176 | BG208291    | -0.64129552   |
| ILMN_1884227 | GPR146      | -0.641315603  |
| ILMN_1775423 | C10orf88    | -0.641348667  |
| ILMN_1795701 | STAR09      | -0.641501915  |
| ILMN_1651617 | CTNNA1      | -0.641568102  |
| ILMN_1800374 | IRX6        | -0.641624418  |
| ILMN_1726409 | KRT23       | -0.641752628  |
| ILMN_1815859 | FRC2        | -0.641893895  |
| ILMN_2107113 | COXMB09     | -0.641903579  |
| ILMN_2364272 | MBNL2       | -0.641992558  |
| ILMN_1788605 | LOC220115   | -0.64202456   |
| ILMN_1685176 | SGMS2       | -0.642301998  |
| ILMN_1808683 | OR4A16      | -0.642302744  |
| ILMN_1736077 | LIAS        | -0.642342016  |
| ILMN_2374778 | DUT         | -0.642448276  |
| ILMN_1711318 | PHF8        | -0.642500276  |
| ILMN_1805127 | C2CD2       | -0.642746883  |
| ILMN_1691803 | KIR2DS2     | -0.642756425  |
| ILMN_2154455 | ZNF330      | -0.642911365  |
| ILMN_2380754 | CCNG1       | -0.643196732  |
| ILMN_1681884 | LOC10090049 | -0.643331042  |
| ILMN_2293594 | LAMA3       | -0.643400737  |
| ILMN_2132898 | SPRN        | -0.643459622  |
| ILMN_1727996 | BAG4        | -0.643605654  |
| ILMN_3238269 | NDUFA6      | -0.643781724  |
| ILMN_2154654 | PTPA4L      | -0.643856049  |
| ILMN_1693937 | CDY18       | -0.643909553  |
| ILMN_2320306 | EFCAB7      | -0.644023146  |
| ILMN_2278518 | NFATC2IP    | -0.644174188  |
| ILMN_1654522 | UNC93B1     | -0.644616316  |
| ILMN_1776674 | SAC3D1      | -0.644681378  |
| ILMN_2136441 | OR52K2      | -0.644818521  |
| ILMN_2136625 | ISCA2       | -0.645172217  |
| ILMN_1694240 | MAP2X1      | -0.645185624  |
| ILMN_2057826 | PHF3        | -0.645270904  |
| ILMN_1671221 | GAPVD1      | -0.645502181  |
| ILMN_1708432 | PLCB1       | -0.645614441  |
| ILMN_1809747 | DBO3B22     | -0.6457125    |
| ILMN_1680899 | TLL3        | -0.645770374  |
| ILMN_1733875 | RUND1       | -0.645793234  |
| ILMN_1675523 | PPAP2C      | -0.645977244  |
| ILMN_1681882 | CETP        | -0.64615453   |
| ILMN_2176450 | CA3         | -0.646190537  |
| ILMN_2413473 | GN2         | -0.6465652681 |
| ILMN_1798712 | USP4        | -0.646668291  |

|              |              |             |
|--------------|--------------|-------------|
| ILMN_1700625 | ATP55        | 0.446108999 |
| ILMN_1791400 | ATE1         | 0.446090492 |
| ILMN_1854833 | CR6Z4291     | 0.446028781 |
| ILMN_1696027 | MPHOSPH8     | 0.445999356 |
| ILMN_1698996 | SLC19A1      | 0.445889832 |
| ILMN_1735004 | C4orf43      | 0.445766445 |
| ILMN_2389984 | RG59         | 0.445733381 |
| ILMN_1667081 | CCND2        | 0.445615697 |
| ILMN_1751776 | CAF2L1       | 0.445610909 |
| ILMN_2325647 | SIK1         | 0.445458786 |
| ILMN_2413899 | MCM10        | 0.44545577  |
| ILMN_1811851 | PRRX1        | 0.445440722 |
| ILMN_1705384 | PFIBP1       | 0.445347389 |
| ILMN_1855278 | AW954199     | 0.445282484 |
| ILMN_1732053 | SNRNP70      | 0.445215904 |
| ILMN_1731223 | AMPD3        | 0.445213557 |
| ILMN_3288218 | RP57         | 0.445179806 |
| ILMN_1664233 | TM6C         | 0.445178417 |
| ILMN_1787931 | PMS2L14      | 0.445039395 |
| ILMN_1697514 | NHP2L1       | 0.444975732 |
| ILMN_1739812 | PRKCG        | 0.444939715 |
| ILMN_1783161 | DAB2IP       | 0.444697887 |
| ILMN_1773546 | MRGPRX3      | 0.444661828 |
| ILMN_2386179 | ZMYND8       | 0.44452286  |
| ILMN_1767139 | NDUFA13      | 0.444493125 |
| ILMN_1746598 | SCN11A       | 0.444403763 |
| ILMN_1797964 | PFAPA1       | 0.444388651 |
| ILMN_1764082 | MBOAT1       | 0.444309959 |
| ILMN_1677404 | RAP2A        | 0.444164169 |
| ILMN_1689257 | MAEA         | 0.44414427  |
| ILMN_1687510 | HRRR         | 0.44408262  |
| ILMN_1662198 | RANCAP1      | 0.444082329 |
| ILMN_1691731 | PABP14       | 0.443997212 |
| ILMN_1706246 | CTCS         | 0.443985049 |
| ILMN_1804448 | MSI2         | 0.443845107 |
| ILMN_2295518 | TRO          | 0.443734886 |
| ILMN_3242540 | CD163L1      | 0.443725574 |
| ILMN_1652246 | NACAD        | 0.44371602  |
| ILMN_2363469 | LOC100340735 | 0.443701956 |
| ILMN_1690040 | TM7SF2       | 0.443624069 |
| ILMN_1696380 | GHR1         | 0.443623872 |
| ILMN_1696546 | FZD1         | 0.443604317 |
| ILMN_2385278 | DCAF4        | 0.443452588 |
| ILMN_1743646 | VASP         | 0.443437846 |
| ILMN_2348378 | SNORA70C     | 0.443431816 |
| ILMN_1738207 | CISH         | 0.443403942 |
| ILMN_1804451 | LEO1         | 0.443391404 |
| ILMN_3258356 | RPSAP52      | 0.443319566 |
| ILMN_2329754 | CHRNA7       | 0.443294332 |
| ILMN_1878490 | RPLR2        | 0.443272171 |
| ILMN_2098796 | CN11         | 0.443235391 |
| ILMN_2328463 | IGF2         | 0.443139288 |
| ILMN_1790162 | ZC3H11A      | 0.443126721 |
| ILMN_3227811 | HNRNP1A1     | 0.443056401 |
| ILMN_1714836 | CDCC142      | 0.443022467 |
| ILMN_1655046 | NUTF2        | 0.443013006 |
| ILMN_1743367 | FZD4         | 0.443006374 |
| ILMN_3238196 | CYTH4        | 0.44299515  |
| ILMN_1715680 | NEIL2        | 0.442917073 |
| ILMN_1732343 | SIK3         | 0.442913831 |
| ILMN_1710752 | NAPRT1       | 0.442845509 |
| ILMN_3221156 | NBP14        | 0.442833948 |
| ILMN_1669227 | ADRA1A       | 0.442744305 |
| ILMN_1687941 | RNF4         | 0.442734846 |
| ILMN_2342835 | P2RY14       | 0.442722114 |
| ILMN_2355776 | GIT2         | 0.442645405 |
| ILMN_2117987 | TDFP1        | 0.442620059 |
| ILMN_1668417 | VWIP1        | 0.44255363  |
| ILMN_2082585 | SNAI2        | 0.442513901 |
| ILMN_1788887 | LOC138799    | 0.442444562 |
| ILMN_1808409 | HIF3A        | 0.442389752 |
| ILMN_2369756 | CDC46        | 0.442266465 |
| ILMN_2305264 | FAM27E3      | 0.442251606 |
| ILMN_1733998 | DHX9         | 0.442250772 |
| ILMN_1663631 | BANP         | 0.442173546 |
| ILMN_1692177 | TSC22D1      | 0.44214417  |
| ILMN_3194087 | HSPC157      | 0.442091884 |
| ILMN_1741572 | AKAP8        | 0.442078888 |
| ILMN_1816244 | LOC151162    | 0.442022827 |
| ILMN_1708510 | HIF1C2B      | 0.442016644 |
| ILMN_3238028 | RPL17        | 0.441906938 |
| ILMN_1799243 | ANKK13       | 0.441813246 |
| ILMN_1663015 | HIF3A        | 0.441768804 |
| ILMN_1808356 | FAM3A        | 0.441761938 |
| ILMN_2176755 | KIAA0895L    | 0.441701653 |
| ILMN_3200218 | SPDYE2       | 0.441636666 |
| ILMN_1713156 | MSL3         | 0.441497579 |
| ILMN_1733535 | ZNF366       | 0.441395877 |
| ILMN_1777487 | ZNF839       | 0.441350116 |
| ILMN_1684271 | ACR06        | 0.441333418 |
| ILMN_1700507 | CLASP1       | 0.441314139 |
| ILMN_1785768 | PDE6A        | 0.441164919 |
| ILMN_1683462 | GSS          | 0.440992053 |
| ILMN_2234709 | C12orf60     | 0.440990876 |
| ILMN_1657237 | NUBP2        | 0.440916318 |
| ILMN_2244108 | ITGB1        | 0.440788214 |
| ILMN_234808  | SNX16        | 0.44077896  |
| ILMN_1712031 | SPDYE2       | 0.440625588 |

|              |              |               |
|--------------|--------------|---------------|
| ILMN_2305416 | PCDHGC3      | -0.646620775  |
| ILMN_2379835 | SUMO1        | -0.646757799  |
| ILMN_1807201 | FAM104A      | -0.646765315  |
| ILMN_1802631 | AGA          | -0.646834445  |
| ILMN_2119224 | KIFAP3       | -0.646962251  |
| ILMN_3251567 | FBXW2        | -0.646963505  |
| ILMN_2196588 | C18orf92     | -0.647065553  |
| ILMN_1915805 | LOC340073    | -0.647068276  |
| ILMN_1640754 | C13orf25 v.1 | -0.647073859  |
| ILMN_1675819 | FAM101A      | -0.647190681  |
| ILMN_1708004 | AT2G2164     | -0.647201297  |
| ILMN_1660260 | MCFD2        | -0.647290217  |
| ILMN_2205350 | NDUFA4       | -0.647357743  |
| ILMN_1706301 | RET          | -0.647504622  |
| ILMN_1735084 | PPP1R3E      | -0.647748041  |
| ILMN_1723467 | ITGB1        | -0.647846304  |
| ILMN_1847133 | AW270402     | -0.647898601  |
| ILMN_1899105 | BCO10870     | -0.647999766  |
| ILMN_2406656 | GATA3        | -0.648011243  |
| ILMN_1674366 | LHX4         | -0.648019667  |
| ILMN_3345281 | NFS          | -0.648046232  |
| ILMN_1656599 | TCEAL8       | -0.648121074  |
| ILMN_2148668 | RCBTB2       | -0.648259107  |
| ILMN_1751760 | BCAS2        | -0.648322638  |
| ILMN_1682544 | LUL1         | -0.648585881  |
| ILMN_1700232 | FBXO30       | -0.648665629  |
| ILMN_1728149 | SLMO2        | -0.648973915  |
| ILMN_1702899 | PLEKHA7      | -0.6489804214 |
| ILMN_1744995 | RGSL1        | -0.649076208  |
| ILMN_3237473 | CBWD1        | -0.649166451  |
| ILMN_1664071 | TNNT2        | -0.649224802  |
| ILMN_1845347 | BM930795     | -0.649230774  |
| ILMN_2395932 | UNC5A4       | -0.649231084  |
| ILMN_1725246 | C08          | -0.649296213  |
| ILMN_1735151 | EFS2A        | -0.649419081  |
| ILMN_1787180 | JOS235       | -0.649496409  |
| ILMN_1718060 | OTUD7A       | -0.649608774  |
| ILMN_1795270 | MYCL1        | -0.649739969  |
| ILMN_2170595 | RNF42B       | -0.649979497  |
| ILMN_1778242 | CALM1        | -0.650062655  |
| ILMN_3249546 | RASA4        | -0.650289762  |
| ILMN_1782439 | CNN3         | -0.65044538   |
| ILMN_1839962 | LOC728724    | -0.650549575  |
| ILMN_1911005 | FRG2         | -0.650643639  |
| ILMN_1894367 | LOC401463    | -0.650666557  |
| ILMN_1784287 | TGFR3        | -0.650683808  |
| ILMN_2324574 | RALGAP1      | -0.650929387  |
| ILMN_1874018 | LOC729175    | -0.650945519  |
| ILMN_3308330 | MIR545       | -0.651077177  |
| ILMN_1733287 | HFDN         | -0.651194595  |
| ILMN_1810200 | ARPC2        | -0.65131128   |
| ILMN_1772286 | OCLAD2       | -0.651572483  |
| ILMN_2341548 | MYO5B        | -0.651612856  |
| ILMN_1716832 | ACSF3        | -0.65180209   |
| ILMN_1704452 | BC19         | -0.651893506  |
| ILMN_1765615 | OR1B1        | -0.652211666  |
| ILMN_1676523 | CDC5C1       | -0.652433181  |
| ILMN_1655151 | ABCA17P      | -0.652525454  |
| ILMN_2219556 | ISCA1        | -0.652635952  |
| ILMN_1751615 | COQ10B       | -0.652765894  |
| ILMN_1710962 | TMEM97       | -0.652844144  |
| ILMN_1813343 | OR10R3P      | -0.652963855  |
| ILMN_1688220 | SYNP02       | -0.652969505  |
| ILMN_1721569 | C12orf40     | -0.653059267  |
| ILMN_1734550 | SLC9A3       | -0.65334639   |
| ILMN_2225511 | BRMS1L       | -0.653400854  |
| ILMN_1786034 | GPRC5B       | -0.653718061  |
| ILMN_1730611 | RYR4         | -0.654062256  |
| ILMN_1870085 | DB279316     | -0.654093725  |
| ILMN_1676321 | FLJ43826     | -0.654233651  |
| ILMN_1697301 | ST8SIA3      | -0.654267817  |
| ILMN_1672009 | KDF2p762B162 | -0.6546634146 |
| ILMN_2333708 | STAG2        | -0.654889318  |
| ILMN_1796138 | BANP         | -0.655009611  |
| ILMN_3266764 | LOC728448    | -0.655086005  |
| ILMN_3237022 | SCGB1C1      | -0.65509598   |
| ILMN_1770361 | BCO40551     | -0.655311882  |
| ILMN_1744647 | CAND1        | -0.655348449  |
| ILMN_1682233 | ESCO1        | -0.655352854  |
| ILMN_1688312 | SLC25A2      | -0.655388888  |
| ILMN_1762327 | DHRS12       | -0.655411763  |
| ILMN_2119555 | TMT3         | -0.655413447  |
| ILMN_1667768 | EFCAB8       | -0.655484059  |
| ILMN_2049511 | FBXO28       | -0.655484421  |
| ILMN_1684023 | NANP3E       | -0.655485968  |
| ILMN_1718265 | ATG5         | -0.655872845  |
| ILMN_1675916 | NA           | -0.656107519  |
| ILMN_3273620 | KHLL3        | -0.656165684  |
| ILMN_1715116 | ATP6V1A      | -0.656269027  |
| ILMN_2244653 | CD13A        | -0.656339586  |
| ILMN_1710852 | MTMR8        | -0.656514715  |
| ILMN_1657697 | SAP1A        | -0.656594395  |

|              |              |             |
|--------------|--------------|-------------|
| ILMN_1654392 | KHNYN        | 0.440224554 |
| ILMN_3255903 | NA           | 0.440175238 |
| ILMN_3262250 | LOC100125556 | 0.440172949 |
| ILMN_3310558 | HRR320       | 0.440080665 |
| ILMN_1765557 | OLFNL2B      | 0.440050877 |
| ILMN_1690224 | SPDYE2       | 0.440030493 |
| ILMN_1719649 | TMEM63A      | 0.440013863 |
| ILMN_2302075 | MSI2         | 0.439971445 |
| ILMN_1807894 | SLC7A8       | 0.439853247 |
| ILMN_2356235 | CYBG1D1      | 0.439850332 |
| ILMN_1696532 | RBPFS        | 0.439725027 |
| ILMN_1725696 | ATXN3        | 0.439692427 |
| ILMN_1743663 | POMT1        | 0.439686973 |
| ILMN_1726114 | SLC45A3      | 0.439670757 |
| ILMN_1702979 | SHOX2        | 0.439624382 |
| ILMN_1787212 | CKR11A       | 0.43945351  |
| ILMN_2362122 | AP3M1        | 0.439383619 |
| ILMN_1678564 | DVL1         | 0.439372327 |
| ILMN_1662256 | PARP6        | 0.439353632 |
| ILMN_2175124 | DAZ2         | 0.43929708  |
| ILMN_323808  | POM121C      | 0.43923158  |
| ILMN_1716816 | TMEM87A      | 0.439187407 |
| ILMN_2415162 | sept-01      | 0.439119079 |
| ILMN_1779841 | PPP2R1B      | 0.439079752 |
| ILMN_2289775 | HAX1         | 0.439049081 |
| ILMN_1811890 | RGS10        | 0.439036719 |
| ILMN_2325053 | NFE          | 0.439001589 |
| ILMN_1748245 | CTNNA1       | 0.438970568 |
| ILMN_1809313 | CASP8        | 0.438961739 |
| ILMN_2414533 | ARMCK6       | 0.438939234 |
| ILMN_1706643 | COL6A3       | 0.438923492 |
| ILMN_2279635 | EIF4G2       | 0.438888083 |
| ILMN_1677262 | RP21         | 0.438859761 |
| ILMN_1747935 | COLG81       | 0.438839642 |
| ILMN_1803856 | DKF2P580I420 | 0.438759813 |
| ILMN_2367233 | ZNF654       | 0.43867078  |
| ILMN_1689431 | APCDD1L      | 0.438669017 |
| ILMN_2103977 | ORS1F2       | 0.438666134 |
| ILMN_1653028 | CNKN1C3      | 0.438638524 |
| ILMN_1813796 | TMEM169      | 0.438623191 |
| ILMN_1762769 | SPDYE7P      | 0.438581941 |
| ILMN_1701169 | HP1BP3       | 0.438547286 |
| ILMN_1670611 | MFS06L       | 0.438430649 |
| ILMN_2192559 | NCRNA00204   | 0.438425612 |
| ILMN_2173611 | MTIE         | 0.438416909 |
| ILMN_1686392 | NBAS         | 0.43833067  |
| ILMN_1674609 | CLTB         | 0.438271746 |
| ILMN_1660277 | PDXDC2       | 0.438222689 |
| ILMN_1771148 | CNTNA4       | 0.438148636 |
| ILMN_1809267 | CLCC1        | 0.437955802 |
| ILMN_1699723 | RARB         | 0.437903993 |
| ILMN_1751439 | EMX2         | 0.43773401  |
| ILMN_2319326 | ADARB1       | 0.4377032   |
| ILMN_2331735 | AP2B1        | 0.43769008  |
| ILMN_1791726 | TUBB8        | 0.437652829 |
| ILMN_1722838 | MRRF4G       | 0.437649415 |
| ILMN_1692591 | RNF183       | 0.437523098 |
| ILMN_2352090 | GPRC5C       | 0.437354825 |
| ILMN_1709367 | FAM186B      | 0.437208162 |
| ILMN_1742390 | FRMD1        | 0.437196498 |
| ILMN_1798256 | URP1         | 0.437090569 |
| ILMN_1663415 | RP17         | 0.43694984  |
| ILMN_2203171 | FRK3         | 0.436939236 |
| ILMN_2358800 | MS4AG6       | 0.436886111 |
| ILMN_1705627 | USP2         | 0.436836354 |
| ILMN_2193233 | MZB1         | 0.436764389 |
| ILMN_1662731 | COL4A3       | 0.436676702 |
| ILMN_2066104 | TFPI2        | 0.436480897 |
| ILMN_3187328 | IPK1         | 0.436302289 |
| ILMN_2357260 | CPSF4        | 0.43630146  |
| ILMN_3240901 | ZBTB7C       | 0.436243977 |
| ILMN_1734479 | ACCN3        | 0.43622507  |
| ILMN_1654612 | ZNF389       | 0.436178473 |
| ILMN_3301168 | UBE2V1       | 0.436048534 |
| ILMN_1753111 | NAMPT        | 0.435942128 |
| ILMN_2086077 | JUNB         | 0.435924093 |
| ILMN_1801984 | VHL          | 0.435896425 |
| ILMN_1715647 | VANGL2       | 0.435873355 |
| ILMN_2330243 | NUDT1        | 0.435823009 |
| ILMN_3306672 | PATL2        | 0.435702003 |
| ILMN_2364828 | OGT          | 0.435655514 |
| ILMN_1755589 | DIP2B        | 0.435650969 |
| ILMN_1682762 | IDH3G        | 0.435666579 |
| ILMN_2394576 | FBXW1        | 0.435493356 |
| ILMN_1761568 | ZDHHC16      | 0.435157936 |
| ILMN_1659054 | CHD3         | 0.435158046 |
| ILMN_2329171 | SPDYE1       | 0.434964171 |
| ILMN_1764109 | C1R          | 0.434874313 |
| ILMN_3237926 | CN2NL        | 0.43484403  |
| ILMN_1770963 | NAALADL1     | 0.434804246 |
| ILMN_1696375 | TTC31        | 0.434788273 |
| ILMN_2381945 | FGA          | 0.434639725 |
| ILMN_2406439 | SPTBN4       | 0.434615872 |
| ILMN_1756942 | SP3          | 0.43457192  |
| ILMN_1697348 | WBSR22       | 0.434570014 |
| ILMN_1772722 | MRRP53       | 0.434562378 |
| ILMN_1896406 | ZDCA         | 0.43454957  |
| ILMN_2121437 | NCL          | 0.434428489 |

|              |              |              |
|--------------|--------------|--------------|
| ILMN_3247013 | EGOT         | -0.656690324 |
| ILMN_2133125 | LRRCA3       | -0.656898742 |
| ILMN_1688886 | GPC5         | -0.656933907 |
| ILMN_1803094 | PQDGF        | -0.657103774 |
| ILMN_1688276 | TRIM20       | -0.657259131 |
| ILMN_3242508 | C19orf71     | -0.657296685 |
| ILMN_1658800 | BRPF3        | -0.657745527 |
| ILMN_2211546 | HAD1         | -0.657770836 |
| ILMN_1773306 | DDX26B       | -0.657816531 |
| ILMN_1765460 | ANNGG1       | -0.657892429 |
| ILMN_3271942 | FLJ45872     | -0.658185093 |
| ILMN_1831214 | AW592010     | -0.658318947 |
| ILMN_1773906 | NCOA4        | -0.658341063 |
| ILMN_1904052 | CCDC122      | -0.658945611 |
| ILMN_1752281 | DNAJC13      | -0.659043673 |
| ILMN_1654430 | AK120671     | -0.659375117 |
| ILMN_1732514 | GALK2        | -0.659399827 |
| ILMN_2061979 | H3F3C        | -0.659462143 |
| ILMN_1657349 | EPHAG        | -0.65949153  |
| ILMN_1672717 | C10orf57     | -0.659494963 |
| ILMN_1678342 | RBPFS        | -0.659610452 |
| ILMN_1695731 | TUBG1        | -0.659646211 |
| ILMN_1717119 | BFS10953     | -0.659742853 |
| ILMN_1767393 | GRIA3        | -0.65991863  |
| ILMN_1723043 | NAP5B        | -0.659944239 |
| ILMN_3251365 | PGGT1B       | -0.660273802 |
| ILMN_1754912 | GLI1         | -0.660652634 |
| ILMN_2184708 | LINC7        | -0.660705773 |
| ILMN_1805823 | BANF2        | -0.660773209 |
| ILMN_2351029 | MTMR2        | -0.661056964 |
| ILMN_1737714 | CDKN2A       | -0.661132221 |
| ILMN_1694311 | NUDT6        | -0.661120005 |
| ILMN_2124155 | ATP1B3       | -0.661233939 |
| ILMN_2388112 | CR1          | -0.661262084 |
| ILMN_1736972 | GKAP1        | -0.661276899 |
| ILMN_1796074 | C18orf56     | -0.661278123 |
| ILMN_1651681 | BCD13377     | -0.661317836 |
| ILMN_1803218 | PRP139       | -0.661439116 |
| ILMN_2069912 | MAGEF8       | -0.662050811 |
| ILMN_3241127 | LOC100128703 | -0.662199607 |
| ILMN_1834180 | LOC440602    | -0.662299129 |
| ILMN_1685399 | AK302783     | -0.662375447 |
| ILMN_1813434 | ATP10A       | -0.662378241 |
| ILMN_1801403 | DCUN1D4      | -0.662408057 |
| ILMN_1708131 | BHLHB9       | -0.662529593 |
| ILMN_1813256 | CNIP2        | -0.662671597 |
| ILMN_1814007 | NA           | -0.66292132  |
| ILMN_1656842 | FLJ44054     | -0.662960479 |
| ILMN_3236325 | LOC441869    | -0.66310342  |
| ILMN_3251391 | UGT8B        | -0.663165139 |
| ILMN_1744795 | TBL1K        | -0.663575959 |
| ILMN_1743187 | C6orf120     | -0.663631348 |
| ILMN_3310975 | MIRS39       | -0.664103731 |
| ILMN_3236428 | TMEM170B     | -0.664139176 |
| ILMN_2229170 | MED7         | -0.66420009  |
| ILMN_1764650 | HPFALL1      | -0.664333123 |
| ILMN_2367215 | PRCP         | -0.664602546 |
| ILMN_1689908 | ANKRD13A     | -0.664693996 |
| ILMN_1803852 | CSAG2        | -0.66472857  |
| ILMN_1702384 | ZNF706       | -0.664990974 |
| ILMN_1756693 | ARHGAP17     | -0.664915225 |
| ILMN_1801223 | WTFP         | -0.66500742  |
| ILMN_2230902 | CTNNA1       | -0.665954135 |
| ILMN_1872769 | BX103063     | -0.665998374 |
| ILMN_1813100 | KIAA1244     | -0.666099327 |
| ILMN_1882652 | BG697942     | -0.666100365 |
| ILMN_1886642 | BX096476     | -0.666194273 |
| ILMN_1827736 | PDI3         | -0.6662371   |
| ILMN_1771223 | PADI2        | -0.666286207 |
| ILMN_1690993 | NEUROG2      | -0.66638383  |
| ILMN_2094294 | NRE2E1       | -0.666550822 |
| ILMN_1773307 | NAP1L5       | -0.666597291 |
| ILMN_2168758 | RNF11        | -0.666693063 |
| ILMN_1855116 | A309213      | -0.666917008 |
| ILMN_1713125 | SPANKD       | -0.666952096 |
| ILMN_3261111 | IPBK3        | -0.667293454 |
| ILMN_1802628 | PPAPDC2      | -0.667713938 |
| ILMN_1794074 | MXI1         | -0.667839131 |
| ILMN_2073010 | TMEM203      | -0.667958816 |
| ILMN_1807994 | PCPAP        | -0.668007904 |
| ILMN_3276971 | DVL1         | -0.668083772 |
| ILMN_1656672 | MYLK         | -0.668168166 |
| ILMN_2179778 | PHLDB2       | -0.668192085 |
| ILMN_1846630 | BE439556     | -0.668246515 |
| ILMN_1718657 | FLJ43950     | -0.668383949 |
| ILMN_3279282 | NA           | -0.668494523 |
| ILMN_2245087 | MFAP2        | -0.668526302 |
| ILMN_1680082 | YOB699       | -0.668591317 |
| ILMN_3268993 | ABC810       | -0.668591411 |
| ILMN_1736441 | PDXP         | -0.668597579 |
| ILMN_1715396 | SNORD56B     | -0.668682029 |
| ILMN_1739674 | PDE4DIP      | -0.669017333 |
| ILMN_1744068 | ELP3         | -0.669056903 |
| ILMN_1751425 | ERMP1        | -0.669113732 |
| ILMN_1737398 | PTPLAD1      | -0.669182477 |
| ILMN_1696031 | C15orf21     | -0.669248532 |
| ILMN_1781803 | TIE1         | -0.669491498 |
| ILMN_1686003 | GNAI3        | -0.669601104 |

|              |              |             |
|--------------|--------------|-------------|
| ILMN_2288175 | AGPAT3       | 0.43437662  |
| ILMN_1735148 | SEC24B       | 0.434310923 |
| ILMN_1689189 | ZBTB3        | 0.434266143 |
| ILMN_1666713 | LYPLA1       | 0.434132765 |
| ILMN_1708604 | CC21         | 0.434003557 |
| ILMN_1704861 | MYO1A        | 0.433964836 |
| ILMN_2212714 | TMEM39B      | 0.433958269 |
| ILMN_1660786 | HIPK1        | 0.433919818 |
| ILMN_1669703 | TNK2         | 0.4339176   |
| ILMN_1747613 | KCNK3        | 0.433851187 |
| ILMN_1666929 | GPATCH3      | 0.433850179 |
| ILMN_1798706 | GRP183       | 0.433842787 |
| ILMN_1697971 | TRIM38       | 0.433833473 |
| ILMN_1797861 | IL6ST        | 0.433807788 |
| ILMN_1671218 | AT1A         | 0.433726749 |
| ILMN_1772482 | SLC6A10P     | 0.433717862 |
| ILMN_1808590 | GUCY1A3      | 0.433661075 |
| ILMN_2377056 | BB57         | 0.433642744 |
| ILMN_2110857 | GALR3        | 0.433584581 |
| ILMN_1804279 | PTRPC        | 0.43331679  |
| ILMN_1679133 | SERPINE1     | 0.433283984 |
| ILMN_3300198 | MMP24        | 0.433283012 |
| ILMN_1690894 | GRP94        | 0.433236971 |
| ILMN_2057573 | ESYT2        | 0.433170109 |
| ILMN_1740762 | GRB7         | 0.433118119 |
| ILMN_1694466 | DHRX3        | 0.43310761  |
| ILMN_2189007 | ASAP4        | 0.433087965 |
| ILMN_2410194 | SPRED3       | 0.433052988 |
| ILMN_2280135 | PAH1A2       | 0.432900334 |
| ILMN_2069446 | SAFB2        | 0.432890079 |
| ILMN_1805652 | PPP2R2D      | 0.43286389  |
| ILMN_1720248 | CLC2         | 0.432817283 |
| ILMN_1789148 | GSTT2B       | 0.432773371 |
| ILMN_1696713 | POLA2        | 0.432769356 |
| ILMN_2245305 | ABHD12       | 0.432764267 |
| ILMN_2077905 | PTGFRN       | 0.432719796 |
| ILMN_1910180 | AKO2468D     | 0.432691709 |
| ILMN_1708328 | RAB11FPB3    | 0.432682035 |
| ILMN_1669928 | ADHESF16     | 0.432670354 |
| ILMN_1695026 | AK31573      | 0.432621948 |
| ILMN_1712913 | UNC5A        | 0.432607425 |
| ILMN_1798379 | NTM          | 0.43251787  |
| ILMN_1726204 | SCRG1        | 0.432504394 |
| ILMN_1725510 | DHCR24       | 0.432462076 |
| ILMN_1671968 | NA           | 0.432424936 |
| ILMN_1673880 | EFEMP1       | 0.432440115 |
| ILMN_1728914 | PRUNE        | 0.432306326 |
| ILMN_1802411 | PELO         | 0.432272101 |
| ILMN_1729269 | LOC285074    | 0.432240079 |
| ILMN_2194577 | PJAP         | 0.432224054 |
| ILMN_1850991 | AKO51342     | 0.432224259 |
| ILMN_1792689 | HST1H2AC     | 0.432191951 |
| ILMN_1748488 | TXNL4B       | 0.432163057 |
| ILMN_1746929 | DNAH17       | 0.432148964 |
| ILMN_1758214 | RARS2        | 0.43211007  |
| ILMN_1680037 | FAM65A       | 0.432031443 |
| ILMN_1734653 | INDC1        | 0.431921249 |
| ILMN_1754507 | IRF4         | 0.431917951 |
| ILMN_1659537 | MED8         | 0.431851124 |
| ILMN_1789614 | TPT1         | 0.431817979 |
| ILMN_1805225 | UPCAF3       | 0.43180842  |
| ILMN_2155034 | SRO5P        | 0.431789272 |
| ILMN_2145501 | ANGPTL1      | 0.431780666 |
| ILMN_1718132 | ECHS1        | 0.431758603 |
| ILMN_1732074 | HNRNP1A1     | 0.431754254 |
| ILMN_3302456 | RPSA         | 0.431741028 |
| ILMN_1730765 | DUJSP22      | 0.43172798  |
| ILMN_1669394 | PICB         | 0.431512486 |
| ILMN_3203126 | LOC100131662 | 0.431481047 |
| ILMN_3209883 | LOC653075    | 0.431447536 |
| ILMN_1733684 | HST1H1T      | 0.431298373 |
| ILMN_1682176 | CLEC3B       | 0.431163222 |
| ILMN_1806165 | HSPA7        | 0.431138143 |
| ILMN_1780108 | PTPN22       | 0.431077434 |
| ILMN_1775879 | KRTAP19-2    | 0.431017751 |
| ILMN_2363361 | SFXN4        | 0.430983861 |
| ILMN_1808152 | SLC41A3      | 0.430941975 |
| ILMN_2290679 | TIRAP        | 0.430870254 |
| ILMN_1807945 | ANP32A       | 0.430866367 |
| ILMN_1772036 | STEAP4       | 0.430865885 |
| ILMN_2365540 | BRPF1        | 0.43084609  |
| ILMN_1793543 | Clorf51      | 0.430792495 |
| ILMN_1782142 | S100A13      | 0.430745606 |
| ILMN_2329114 | COLQ         | 0.430393275 |
| ILMN_1756326 | CSK2         | 0.43021899  |
| ILMN_1703229 | CECR6        | 0.430192023 |
| ILMN_1657760 | SYT17        | 0.430091608 |
| ILMN_2329735 | ECM1         | 0.430051952 |
| ILMN_1706455 | TTC5         | 0.429915951 |
| ILMN_1787260 | LCE3B        | 0.429915094 |
| ILMN_2138038 | UTP1L1       | 0.429904076 |
| ILMN_3203801 | ZNF532       | 0.429893996 |
| ILMN_1671288 | ODF2         | 0.429802048 |
| ILMN_1808566 | TMEM180      | 0.429786512 |
| ILMN_1788356 | AKIP1        | 0.429766083 |
| ILMN_1813207 | MRR59        | 0.4297278   |
| ILMN_1798728 | CLNH2        | 0.429611536 |
| ILMN_1719204 | PRPF31       | 0.429579224 |

|              |              |              |
|--------------|--------------|--------------|
| ILMN_1719468 | EPH2A        | -0.669693474 |
| ILMN_1702009 | SV2A         | -0.669712116 |
| ILMN_1782994 | WRBP1P1      | -0.669877811 |
| ILMN_1800590 | IBS1         | -0.669985685 |
| ILMN_1884277 | AAH13455     | -0.670210112 |
| ILMN_2104106 | XPR1         | -0.670254933 |
| ILMN_1763878 | CDADC1       | -0.670293059 |
| ILMN_1786444 | LPL          | -0.670453356 |
| ILMN_1671427 | FBXW4        | -0.670531115 |
| ILMN_1745422 | LMNB1        | -0.670590874 |
| ILMN_1717757 | CALML4       | -0.670669995 |
| ILMN_3238832 | RBMY3AP      | -0.670755773 |
| ILMN_1777479 | CDYL2        | -0.670915899 |
| ILMN_1773763 | MTA2         | -0.67121535  |
| ILMN_2357577 | PRKAA1       | -0.671347696 |
| ILMN_3235133 | MYO5B        | -0.671555702 |
| ILMN_1809148 | OR6C74       | -0.671658129 |
| ILMN_1907218 | BM973226     | -0.671692532 |
| ILMN_1759023 | WFS1         | -0.6721559   |
| ILMN_1747678 | LOC647946    | -0.672188018 |
| ILMN_1712088 | CLIRL        | -0.672198788 |
| ILMN_1838398 | DA268131     | -0.672326956 |
| ILMN_1719753 | VGLL1        | -0.672356367 |
| ILMN_1813664 | HIRA         | -0.672695595 |
| ILMN_1902209 | BU743228     | -0.672738224 |
| ILMN_1728965 | C1orf57      | -0.672749478 |
| ILMN_2195914 | GGH          | -0.672874327 |
| ILMN_1791030 | NEUROG1      | -0.672925258 |
| ILMN_1715991 | SDPR         | -0.672936093 |
| ILMN_1707506 | YTHDC1       | -0.673502453 |
| ILMN_1656165 | USP9X        | -0.673636272 |
| ILMN_1665877 | RNF149       | -0.674020033 |
| ILMN_1651907 | TPS3B        | -0.674013187 |
| ILMN_1673080 | LOC643669    | -0.674103256 |
| ILMN_1809139 | AHCTF1       | -0.674192854 |
| ILMN_1774083 | TRAP1        | -0.674243599 |
| ILMN_1730209 | OR5A1        | -0.674375136 |
| ILMN_1662578 | C1GALT1      | -0.674650889 |
| ILMN_1821199 | CIT447476    | -0.674834746 |
| ILMN_1695601 | AKOR800D     | -0.674925375 |
| ILMN_1652164 | UNC93B1      | -0.675288658 |
| ILMN_1660730 | SLC7A3       | -0.675328208 |
| ILMN_1808824 | NEBL         | -0.675471394 |
| ILMN_2116811 | C1orf70      | -0.675556088 |
| ILMN_1688905 | C1orf121     | -0.675555219 |
| ILMN_3248795 | ACTR3B       | -0.675578244 |
| ILMN_3242011 | MOBK1B       | -0.675621047 |
| ILMN_1764861 | ISOC1        | -0.675754221 |
| ILMN_1774028 | MYFR1        | -0.675933473 |
| ILMN_3243846 | FSLR4        | -0.675987258 |
| ILMN_1665717 | EIF2S3       | -0.676116892 |
| ILMN_1734602 | SRRM2        | -0.676173188 |
| ILMN_3227060 | AMD1         | -0.676218398 |
| ILMN_1761721 | VP335        | -0.676223536 |
| ILMN_2177732 | RANBP6       | -0.676302903 |
| ILMN_1811997 | RNF115       | -0.676353556 |
| ILMN_2180682 | MTPN         | -0.676966667 |
| ILMN_1696041 | CDC42        | -0.677189401 |
| ILMN_1691143 | RAB18        | -0.677541597 |
| ILMN_1797181 | LOC93622     | -0.677602447 |
| ILMN_1762033 | NAPEPD       | -0.677693461 |
| ILMN_3246169 | PRK20A       | -0.677812687 |
| ILMN_3308808 | MIR130A      | -0.677911863 |
| ILMN_1815949 | SLC24A4      | -0.677937647 |
| ILMN_3187535 | FAM30A       | -0.677995749 |
| ILMN_1793670 | LOC100128571 | -0.678393362 |
| ILMN_1710645 | NA           | -0.678461108 |
| ILMN_1744614 | PEXRD6       | -0.678624607 |
| ILMN_1757781 | LOC100128571 | -0.678858082 |
| ILMN_1739521 | NLGN1        | -0.67899816  |
| ILMN_1707985 | FOXRI        | -0.678931664 |
| ILMN_2084182 | RPL10        | -0.679139925 |
| ILMN_1774955 | IMAA         | -0.679140104 |
| ILMN_1748427 | ZNF239       | -0.679379366 |
| ILMN_2093810 | POMP         | -0.679372522 |
| ILMN_1678217 | DMRTC1B      | -0.679658188 |
| ILMN_2171102 | MSL2         | -0.679867377 |
| ILMN_2295698 | AFG3L1       | -0.679923017 |
| ILMN_1679389 | ZFP57        | -0.680138135 |
| ILMN_3307659 | SFT2D2       | -0.680333745 |
| ILMN_1668376 | SFT2D2       | -0.680356006 |
| ILMN_1702858 | ADHFE1       | -0.681276007 |
| ILMN_2180582 | PNPLA8       | -0.681313431 |
| ILMN_2144088 | FDFT1        | -0.681314013 |
| ILMN_1799614 | PNPLA6       | -0.681351989 |
| ILMN_1686791 | CENKA        | -0.681386108 |
| ILMN_1703346 | CHRNE        | -0.681504557 |
| ILMN_2064898 | CDC56        | -0.681623254 |
| ILMN_1731616 | DCLK1        | -0.681647579 |
| ILMN_2363668 | YF1B         | -0.681662143 |
| ILMN_2046315 | GABRBAPL2    | -0.681691619 |
| ILMN_2350301 | PRB1         | -0.68171256  |
| ILMN_1782015 | FCRLB        | -0.681794382 |
| ILMN_3209098 | FAM71E2      | -0.68180305  |
| ILMN_3237329 | FNIP2        | -0.682352465 |
| ILMN_3310643 | VTRNA2-1     | -0.682454978 |
| ILMN_1855996 | ABRMS53      | -0.682460077 |
| ILMN_1761113 | GNL2         | -0.682683113 |

|              |           |              |
|--------------|-----------|--------------|
| ILMN_1821887 | AK023756  | 0.429525734  |
| ILMN_1736165 | MLL3      | 0.429500129  |
| ILMN_1791052 | PXBP1     | 0.429442625  |
| ILMN_1695812 | KRT72     | 0.429431822  |
| ILMN_2342271 | BC1L1A    | 0.4292919435 |
| ILMN_1726181 | C19orf52  | 0.429203773  |
| ILMN_3242105 | LYPD1     | 0.429172726  |
| ILMN_1672554 | C17orf81  | 0.429014162  |
| ILMN_1734783 | ZMYND11   | 0.428890148  |
| ILMN_1780898 | PRKCH     | 0.428832825  |
| ILMN_3249835 | NA        | 0.428775158  |
| ILMN_1784040 | NAPSA     | 0.428759825  |
| ILMN_1695041 | GATAG     | 0.428743879  |
| ILMN_1746846 | TTL4      | 0.428577042  |
| ILMN_1773126 | FAM11     | 0.428566835  |
| ILMN_3184067 | LOC40905  | 0.428550858  |
| ILMN_3310391 | MIR1204   | 0.428524489  |
| ILMN_1792495 | AHNAK     | 0.428414686  |
| ILMN_2327090 | MAEA      | 0.428333776  |
| ILMN_1763487 | CTLA4     | 0.428094919  |
| ILMN_1696126 | STX18     | 0.428034136  |
| ILMN_2268618 | PHF20L1   | 0.427969647  |
| ILMN_2095820 | UTP14A    | 0.427909425  |
| ILMN_3225406 | LOC728640 | 0.427844639  |
| ILMN_1655766 | ANKRD348  | 0.427841398  |
| ILMN_2362982 | ARID4B    | 0.427684344  |
| ILMN_2371152 | KLCA      | 0.427660801  |
| ILMN_1702385 | LILRA4    | 0.427575659  |
| ILMN_1726281 | ANAPC11   | 0.427508263  |
| ILMN_2401714 | MS4A1     | 0.427367545  |
| ILMN_1740572 | TCN2      | 0.427329636  |
| ILMN_1698463 | ILF3      | 0.427172896  |
| ILMN_1670796 | DXDC210   | 0.427082157  |
| ILMN_1728180 | LUC7L3    | 0.42700846   |
| ILMN_1712347 | SRSF6     | 0.426970194  |
| ILMN_1747775 | STX2      | 0.426857701  |
| ILMN_1770697 | HNRNPK    | 0.426762186  |
| ILMN_1712718 | NPNT1     | 0.426702968  |
| ILMN_1694547 | IFOD1     | 0.426684449  |
| ILMN_1815124 | CHCHD2    | 0.426415955  |
| ILMN_3187763 | DB453801  | 0.426352813  |
| ILMN_1789400 | FOXO2     | 0.426199633  |
| ILMN_1705763 | SCT       | 0.426195293  |
| ILMN_1675543 | PRM1      | 0.426174005  |
| ILMN_1751956 | MGST3     | 0.426113021  |
| ILMN_1654586 | RASA3     | 0.426078175  |
| ILMN_1791770 | SMARCC2   | 0.426001812  |
| ILMN_1746673 | sept-03   | 0.425987289  |
| ILMN_2410262 | MTNR14    | 0.425961192  |
| ILMN_1747586 | TIG       | 0.425791466  |
| ILMN_1697268 | EMILIN2   | 0.425755903  |
| ILMN_1673108 | AP2A1     | 0.425747463  |
| ILMN_1791057 | IFNAR2    | 0.425688029  |
| ILMN_2059744 | IL7       | 0.425548896  |
| ILMN_3249742 | PXMP4     | 0.425433504  |
| ILMN_1775823 | POPDC2    | 0.425388569  |
| ILMN_1815121 | PLACL1    | 0.425358318  |
| ILMN_2182198 | ICT1      | 0.425256396  |
| ILMN_1710747 | AF208111  | 0.425249463  |
| ILMN_3236367 | IFFO2     | 0.425235125  |
| ILMN_1790704 | SFAP16    | 0.425226718  |
| ILMN_1802771 | C22orf15  | 0.425170517  |
| ILMN_1658426 | WNT10A    | 0.425104378  |
| ILMN_1691080 | OR6B1     | 0.425077431  |
| ILMN_2231003 | MAGEA12   | 0.425039344  |
| ILMN_1754468 | RGS9      | 0.425001089  |
| ILMN_1810267 | DNH01     | 0.424976423  |
| ILMN_1657146 | HTKOR     | 0.424972516  |
| ILMN_1766085 | REL       | 0.424957194  |
| ILMN_1786893 | RBM5      | 0.424921957  |
| ILMN_1799198 | OTUB2     | 0.424913869  |
| ILMN_3241005 | MFS06L    | 0.424866074  |
| ILMN_1715635 | ATP9V0E1  | 0.424825699  |
| ILMN_2078226 | MAGEH1A   | 0.424822216  |
| ILMN_1756705 | CHTF18    | 0.424720744  |
| ILMN_1718013 | CPHF3L    | 0.424660905  |
| ILMN_1775761 | TSR1      | 0.42465112   |
| ILMN_2190414 | ZNF83     | 0.424621161  |
| ILMN_1705676 | MIR49     | 0.424594236  |
| ILMN_1811364 | C55F6913  | 0.424552496  |
| ILMN_1895548 | AK021726  | 0.424529988  |
| ILMN_1752520 | SLFN11    | 0.424425403  |
| ILMN_2415235 | CSNK1E    | 0.424411913  |
| ILMN_1691409 | SEC31A    | 0.424390405  |
| ILMN_1698608 | FOLR1     | 0.424283405  |
| ILMN_1656129 | SLC9A10   | 0.424184824  |
| ILMN_1702806 | PDC13     | 0.424162752  |
| ILMN_1750711 | MYO19     | 0.424142668  |
| ILMN_1730630 | CxorF56   | 0.424070845  |
| ILMN_2386040 | MYO19     | 0.424044905  |
| ILMN_1807710 | HINT1     | 0.424022121  |
| ILMN_1703864 | SFTA2     | 0.423935952  |
| ILMN_1815480 | NAT8      | 0.423911383  |
| ILMN_1796340 | PSMD3     | 0.423775637  |
| ILMN_1661755 | FAM129B   | 0.423744518  |
| ILMN_1799600 | STARDB2   | 0.423736402  |
| ILMN_1685709 | TMEM125   | 0.423613982  |
| ILMN_2374728 | ARRP21    | 0.423414068  |

|              |              |               |
|--------------|--------------|---------------|
| ILMN_1886816 | A1334326     | -0.683074807  |
| ILMN_1737965 | ELOVL4       | -0.683241734  |
| ILMN_1655163 | STX24        | -0.683467453  |
| ILMN_1719163 | ZNF557       | -0.683838276  |
| ILMN_3289779 | NA           | -0.6838313281 |
| ILMN_2334185 | NCKAP5       | -0.683897646  |
| ILMN_2315789 | PTPRD        | -0.684170915  |
| ILMN_2358278 | RSRC2        | -0.684523651  |
| ILMN_3204886 | SLC16A6      | -0.684625025  |
| ILMN_1762631 | TSC2         | -0.68493796   |
| ILMN_2219681 | RBP2         | -0.684913043  |
| ILMN_2081988 | LANCL1       | -0.68513847   |
| ILMN_1716019 | RHBDL3       | -0.685288997  |
| ILMN_1733390 | LARP1B       | -0.685387817  |
| ILMN_1784737 | S1PR6        | -0.685398961  |
| ILMN_2252965 | H2AF1        | -0.685407672  |
| ILMN_1760110 | AKO23936     | -0.685504259  |
| ILMN_2058512 | PSMA2        | -0.6856397    |
| ILMN_1709824 | PCDHGC3      | -0.685767999  |
| ILMN_1893033 | DB307015     | -0.685769409  |
| ILMN_1738346 | EFHA1        | -0.685810418  |
| ILMN_1674759 | LPXAT4       | -0.685858591  |
| ILMN_1678965 | FABP1        | -0.685917448  |
| ILMN_1660963 | CCIN         | -0.686023255  |
| ILMN_1762871 | RNASE13      | -0.68613425   |
| ILMN_1792671 | C12orf29     | -0.686534743  |
| ILMN_2163714 | PACRG        | -0.686937085  |
| ILMN_3299330 | LOC643719    | -0.687218923  |
| ILMN_3244860 | LRRCL6B      | -0.687252203  |
| ILMN_1840036 | BM672267     | -0.687347276  |
| ILMN_1761820 | EDARADD      | -0.687689278  |
| ILMN_1717337 | MARCK7       | -0.687832642  |
| ILMN_1691775 | TAR          | -0.687933202  |
| ILMN_1804662 | NRG4         | -0.688177034  |
| ILMN_1691047 | EP8L2        | -0.688263115  |
| ILMN_1775901 | PHF5A        | -0.688351494  |
| ILMN_1795936 | C3orf36      | -0.68861231   |
| ILMN_1782954 | UBE2K        | -0.688658503  |
| ILMN_3250909 | ALL37495     | -0.6886837    |
| ILMN_1668507 | DDAH1        | -0.688721132  |
| ILMN_2404539 | C2orf30      | -0.68885398   |
| ILMN_2288915 | DNAH14       | -0.688977121  |
| ILMN_1705568 | CRS96696     | -0.689058341  |
| ILMN_3210845 | MIR511-2     | -0.689228637  |
| ILMN_3214463 | HNRNRA1      | -0.689412585  |
| ILMN_1837348 | AID27125     | -0.689463332  |
| ILMN_2283915 | MAP2         | -0.689542666  |
| ILMN_1684045 | CDC4A        | -0.689748708  |
| ILMN_2212147 | KIAA0825     | -0.689769978  |
| ILMN_1668526 | CALD1        | -0.689958743  |
| ILMN_1692517 | SORD         | -0.689962978  |
| ILMN_1669572 | RNF126       | -0.690022138  |
| ILMN_3237529 | DEFB108B     | -0.690338825  |
| ILMN_3205614 | ZNF812       | -0.690694449  |
| ILMN_1676763 | PIPF51A      | -0.690905834  |
| ILMN_2381730 | EGFL7        | -0.691014979  |
| ILMN_3207648 | CS           | -0.691055662  |
| ILMN_3274596 | EIF4A2       | -0.691135013  |
| ILMN_1661264 | SHMT2        | -0.691294584  |
| ILMN_1878728 | DB222718     | -0.691703619  |
| ILMN_1847602 | HAR1A        | -0.691858802  |
| ILMN_1701558 | DUG1         | -0.691923792  |
| ILMN_1726647 | RPS26        | -0.691936275  |
| ILMN_2363634 | ADHFE1       | -0.691938087  |
| ILMN_1688294 | LOC100132966 | -0.691951368  |
| ILMN_2183610 | SERAC1       | -0.692209954  |
| ILMN_3271719 | NEDD8        | -0.692253643  |
| ILMN_1906098 | BUB1B241     | -0.692276094  |
| ILMN_3241783 | FLOO326      | -0.693059224  |
| ILMN_1690327 | CLCN5        | -0.693107396  |
| ILMN_1810712 | ARHGEP12     | -0.69314091   |
| ILMN_1664371 | HIATL1       | -0.69321508   |
| ILMN_1756723 | DPY7         | -0.693395567  |
| ILMN_1667633 | RANBP5       | -0.693465345  |
| ILMN_1729650 | PEX7         | -0.69356199   |
| ILMN_2123550 | OR8B12       | -0.694645482  |
| ILMN_2054607 | CYP4V2       | -0.694746136  |
| ILMN_1712137 | LOC100128219 | -0.694787314  |
| ILMN_1763404 | SRP9         | -0.694951908  |
| ILMN_1849186 | ZNF704       | -0.694983474  |
| ILMN_2180866 | RPS26P11     | -0.6950003    |
| ILMN_1766770 | SNX31        | -0.69500546   |
| ILMN_1767184 | BC153822     | -0.695052348  |
| ILMN_1768357 | RTN1         | -0.695124443  |
| ILMN_3235825 | UBE2Q2P2     | -0.69516676   |
| ILMN_1737988 | PRNP         | -0.695201315  |
| ILMN_1807331 | BLUD         | -0.695234969  |
| ILMN_1671777 | FGF13        | -0.695295341  |
| ILMN_3249756 | DNASE1L1     | -0.695300808  |
| ILMN_1712213 | SH3YL1       | -0.695494389  |
| ILMN_1700159 | NIF5AP3A     | -0.695559489  |
| ILMN_1722849 | UNC113A      | -0.695722445  |
| ILMN_2129715 | COG3         | -0.695740458  |
| ILMN_1677723 | ANGPT1       | -0.695848284  |
| ILMN_1742324 | C1orf9       | -0.695878093  |
| ILMN_1819783 | FNP2         | -0.695878458  |
| ILMN_1695945 | FAM136A      | -0.695981049  |
| ILMN_1780861 | METRN1       | -0.69616279   |

|              |              |             |
|--------------|--------------|-------------|
| ILMN_2396813 | BABAM1       | 0.423411978 |
| ILMN_1660900 | SNORA7B      | 0.423389792 |
| ILMN_1806488 | CCDC108      | 0.423313059 |
| ILMN_2382724 | METT123      | 0.423165518 |
| ILMN_2305544 | DBI          | 0.423094462 |
| ILMN_1744628 | FDX1L        | 0.422997613 |
| ILMN_3237534 | UBE2MP1      | 0.422976331 |
| ILMN_1764891 | ZNF384       | 0.42278448  |
| ILMN_1698139 | ANKRD6       | 0.422773755 |
| ILMN_1671885 | MALE2        | 0.422624127 |
| ILMN_2400854 | ICAIL        | 0.422547761 |
| ILMN_3242035 | DA731816     | 0.422527232 |
| ILMN_1757074 | NGG10        | 0.422499786 |
| ILMN_2066020 | TCEB1        | 0.422458635 |
| ILMN_2339548 | STAC3L2      | 0.422390605 |
| ILMN_1700747 | XPOC         | 0.422280573 |
| ILMN_3245310 | CCDC94       | 0.422122546 |
| ILMN_1743219 | CA11         | 0.422066096 |
| ILMN_2117330 | NDUFB2       | 0.422050481 |
| ILMN_1738742 | PIAT         | 0.42201905  |
| ILMN_3244117 | STMN3        | 0.422008815 |
| ILMN_3294119 | BXO9650      | 0.421936664 |
| ILMN_1699085 | AJ312026     | 0.421892408 |
| ILMN_1704529 | PPIA         | 0.421846841 |
| ILMN_3194638 | FAM176A      | 0.421806523 |
| ILMN_1724406 | INOB0E       | 0.421701312 |
| ILMN_2175265 | TMEH11       | 0.421684482 |
| ILMN_1671869 | UGP2         | 0.421692191 |
| ILMN_3203765 | FLJ00317     | 0.421605596 |
| ILMN_1732489 | SLC10A7      | 0.421559762 |
| ILMN_2197225 | ANKHD1       | 0.421467871 |
| ILMN_1761275 | FLTB         | 0.421440714 |
| ILMN_1655644 | SARX2        | 0.421413455 |
| ILMN_2091792 | ENTPD6       | 0.421336675 |
| ILMN_1751444 | NCAPG        | 0.421229867 |
| ILMN_1728236 | SLFN12       | 0.421132095 |
| ILMN_2306033 | PRAME        | 0.421086984 |
| ILMN_1654960 | CECR5        | 0.421021833 |
| ILMN_1711904 | AKO3         | 0.420853571 |
| ILMN_1721448 | VSX2         | 0.420800712 |
| ILMN_1656045 | CELF6        | 0.420663241 |
| ILMN_1717234 | CAST         | 0.420631603 |
| ILMN_1703787 | ATP4B        | 0.420536626 |
| ILMN_1795041 | PPIA2        | 0.420507886 |
| ILMN_1706571 | SLC120D      | 0.420485446 |
| ILMN_1905053 | BXS38256     | 0.420483815 |
| ILMN_1679727 | CLK1         | 0.420412957 |
| ILMN_1736704 | DIXD1        | 0.42031107  |
| ILMN_2283195 | APOL3        | 0.420266085 |
| ILMN_2325471 | KH2D9        | 0.420254552 |
| ILMN_1782167 | RPL32        | 0.420239879 |
| ILMN_1728121 | OR10R2       | 0.420230346 |
| ILMN_1703471 | ATF6         | 0.420192718 |
| ILMN_1740345 | THYN1        | 0.42017883  |
| ILMN_1782596 | GCL25        | 0.420097772 |
| ILMN_1700432 | IFPK8        | 0.420063222 |
| ILMN_1740957 | NVL          | 0.420017823 |
| ILMN_2370622 | F8           | 0.420006141 |
| ILMN_1652992 | PRDM2        | 0.419953061 |
| ILMN_1808905 | AKAP3        | 0.419929266 |
| ILMN_1742427 | POLR1D       | 0.419899932 |
| ILMN_1752247 | AAPO3        | 0.41985644  |
| ILMN_3245066 | DENNDB4      | 0.419784383 |
| ILMN_1795243 | RPS4X        | 0.419781358 |
| ILMN_1657381 | RASSF6       | 0.419520253 |
| ILMN_1715069 | TANK         | 0.419425942 |
| ILMN_1657423 | SPG21        | 0.419317819 |
| ILMN_3233032 | RIA          | 0.419188456 |
| ILMN_2297854 | P2RY2        | 0.419131796 |
| ILMN_1809483 | HSD17B14     | 0.419081671 |
| ILMN_1747451 | PLCKD1       | 0.419016463 |
| ILMN_1652082 | ELF4         | 0.419008364 |
| ILMN_2174341 | GPR83        | 0.418992472 |
| ILMN_1696004 | IRX1         | 0.418965992 |
| ILMN_1786270 | PROM1        | 0.418784355 |
| ILMN_1733956 | IARS         | 0.418760909 |
| ILMN_1712657 | BPTF         | 0.418747199 |
| ILMN_2112580 | FCGR3A       | 0.418676857 |
| ILMN_1741841 | XIAA1429     | 0.418648285 |
| ILMN_1671686 | EP8A9        | 0.418616572 |
| ILMN_1664772 | ATP2B4       | 0.418584947 |
| ILMN_1670087 | FBXO43       | 0.418562678 |
| ILMN_2386849 | DSE          | 0.418545903 |
| ILMN_1799814 | SNRNP40      | 0.418515712 |
| ILMN_1808898 | NP2          | 0.418511639 |
| ILMN_1669545 | PCSK7        | 0.418463006 |
| ILMN_1666832 | RAP1GAP2     | 0.418454231 |
| ILMN_1792012 | OTUB2        | 0.418421932 |
| ILMN_2363621 | RBBP8        | 0.418385841 |
| ILMN_2048478 | SLC22A3      | 0.418212718 |
| ILMN_3211707 | LOC100306975 | 0.418154831 |
| ILMN_1669352 | LYGG6C       | 0.418073834 |
| ILMN_1756877 | C14orf179    | 0.417963806 |
| ILMN_3225767 | ZNF534       | 0.417862936 |
| ILMN_2178855 | GPAM         | 0.417791298 |
| ILMN_2412139 | CABYR        | 0.417755182 |
| ILMN_1680435 | NFE2P3       | 0.417738751 |
| ILMN_3244969 | ZNF48        | 0.417721257 |

|              |               |              |
|--------------|---------------|--------------|
| ILMN_2168166 | ASPN          | -0.696288811 |
| ILMN_1733807 | IGFBP1        | -0.696347478 |
| ILMN_2067607 | TMEM106B      | -0.696741595 |
| ILMN_1697405 | PCL1          | -0.697094818 |
| ILMN_2320016 | HGD1A         | -0.697159906 |
| ILMN_1685886 | MAPK4         | -0.697195147 |
| ILMN_1750636 | RPS26         | -0.69742275  |
| ILMN_1765072 | KRT85         | -0.697494679 |
| ILMN_1727798 | MOSPD1        | -0.697717896 |
| ILMN_2322558 | ARLSA         | -0.698082835 |
| ILMN_2207504 | LEP           | -0.69827379  |
| ILMN_1722538 | DEFB123       | -0.698364608 |
| ILMN_3307954 | L3MBTL4       | -0.698657465 |
| ILMN_1754655 | TLL5          | -0.698683504 |
| ILMN_1758400 | GRIN3A        | -0.698790966 |
| ILMN_1717982 | BZV1          | -0.698841052 |
| ILMN_1703174 | FREM2         | -0.699350823 |
| ILMN_3180456 | NA            | -0.699364588 |
| ILMN_2156936 | SCCPDH        | -0.699408528 |
| ILMN_2053679 | ACADM         | -0.699531257 |
| ILMN_2320850 | UBE2O3        | -0.699544725 |
| ILMN_1774715 | OR9P3         | -0.699592792 |
| ILMN_2387395 | SCN3A         | -0.700189528 |
| ILMN_1891725 | BX111675      | -0.700670644 |
| ILMN_1785107 | NXT2          | -0.700732515 |
| ILMN_2183938 | LEM03         | -0.700879968 |
| ILMN_1730791 | HGCA4         | -0.700951123 |
| ILMN_3308592 | MIR88         | -0.700953836 |
| ILMN_1741695 | COL12A1       | -0.701021526 |
| ILMN_1738987 | HS2T1         | -0.701322805 |
| ILMN_1654402 | IL18BP        | -0.701924306 |
| ILMN_2054938 | RBAK          | -0.701931017 |
| ILMN_1770466 | ATP5G3        | -0.701989236 |
| ILMN_1735680 | TMEM30A       | -0.702542973 |
| ILMN_2404085 | CLIP1         | -0.702615566 |
| ILMN_1739429 | HS6ST2        | -0.702817509 |
| ILMN_1689070 | COG7          | -0.702930688 |
| ILMN_1900347 | ATP70700      | -0.702933506 |
| ILMN_2123525 | SYCP3         | -0.702962148 |
| ILMN_1685703 | ACDX2         | -0.702969101 |
| ILMN_2371379 | AGLY          | -0.703058574 |
| ILMN_1780924 | SLC3A1        | -0.703527371 |
| ILMN_1800540 | CD55          | -0.703720728 |
| ILMN_2202857 | CHP1          | -0.704287889 |
| ILMN_1786337 | CXCL17        | -0.705039047 |
| ILMN_2096083 | PLEKHA5       | -0.705869632 |
| ILMN_2401933 | ATP2B1        | -0.705949306 |
| ILMN_2143148 | TMD21         | -0.706436286 |
| ILMN_2136971 | FABP3         | -0.706659132 |
| ILMN_1812902 | CYR1          | -0.706925723 |
| ILMN_1729482 | KLHL5         | -0.707008934 |
| ILMN_1697557 | NA            | -0.70712293  |
| ILMN_1808769 | C1orf97       | -0.707236207 |
| ILMN_3182171 | FGGY          | -0.707624024 |
| ILMN_2388517 | MTERFD3       | -0.708332665 |
| ILMN_3329683 | SNVS          | -0.708935483 |
| ILMN_1744534 | LYRM5         | -0.709161245 |
| ILMN_1839190 | BCO73918      | -0.70943278  |
| ILMN_1656413 | ZMPSTE24      | -0.709525636 |
| ILMN_1769150 | THAP5         | -0.709585068 |
| ILMN_1800871 | RAB6A         | -0.709997633 |
| ILMN_2099798 | LYR41         | -0.710047506 |
| ILMN_1666617 | GRB10         | -0.710188541 |
| ILMN_1683755 | SOX13         | -0.710320732 |
| ILMN_3308435 | MIR1914       | -0.711223463 |
| ILMN_1704943 | GNP3          | -0.711272573 |
| ILMN_1701624 | AKO98200      | -0.711461605 |
| ILMN_1661363 | AF064105      | -0.711516126 |
| ILMN_1748650 | MRLP45        | -0.711552321 |
| ILMN_2400583 | USP9X         | -0.711599849 |
| ILMN_1776858 | DUS4L         | -0.711780331 |
| ILMN_1689129 | OPRM1         | -0.711911224 |
| ILMN_1718001 | PHK8          | -0.712057135 |
| ILMN_3303671 | POM121-like 1 | -0.712062089 |
| ILMN_2047856 | EHA2E         | -0.712182466 |
| ILMN_1746664 | WSB2          | -0.71284246  |
| ILMN_1756162 | EXOSC8        | -0.712924187 |
| ILMN_1723521 | AIAP1         | -0.712929927 |
| ILMN_345287  | SCNSA         | -0.71300795  |
| ILMN_2342841 | AFTW1         | -0.71313124  |
| ILMN_1787830 | BASE          | -0.713511296 |
| ILMN_3193266 | NA            | -0.713525307 |
| ILMN_2176768 | SEPHS1        | -0.713693415 |
| ILMN_2221006 | RAD21         | -0.71381718  |
| ILMN_2388387 | LYR01         | -0.713862517 |
| ILMN_1772925 | UBE2NL        | -0.713862619 |
| ILMN_3248747 | LOC647983     | -0.713965608 |
| ILMN_1723874 | MRP56         | -0.713976326 |
| ILMN_3244733 | ALS65221      | -0.71407273  |
| ILMN_3239173 | WAPAL         | -0.714616566 |
| ILMN_3349911 | PCBP3         | -0.714814899 |
| ILMN_2425180 | BUB3          | -0.714971426 |
| ILMN_2223922 | AGTR9P1       | -0.715025908 |
| ILMN_2135232 | SRSF3         | -0.715149031 |
| ILMN_3201715 | NA            | -0.715189813 |
| ILMN_2151739 | CAT           | -0.715310352 |
| ILMN_2184649 | COB7B         | -0.715450713 |
| ILMN_3235817 | LOC100132941  | -0.715499999 |

|              |           |              |
|--------------|-----------|--------------|
| ILMN_2278636 | CUX1      | 0.417637061  |
| ILMN_1691702 | ZNF775    | 0.417556161  |
| ILMN_2309228 | GP51      | 0.417525115  |
| ILMN_1723048 | GIC2      | 0.417520591  |
| ILMN_1656900 | SULT1A1   | 0.417497254  |
| ILMN_1675427 | NBPFL5    | 0.417489947  |
| ILMN_1698677 | C4orf27   | 0.417369379  |
| ILMN_1747105 | CAPS2     | 0.417215353  |
| ILMN_2379585 | RYR4F7    | 0.417190139  |
| ILMN_1768940 | CCIL1S41  | 0.417137344  |
| ILMN_2383058 | SIRPG     | 0.417024812  |
| ILMN_1812096 | CADM4     | 0.416995372  |
| ILMN_1786211 | HERC1     | 0.416985532  |
| ILMN_1796682 | PARP3     | 0.416928033  |
| ILMN_1767981 | MIR492    | 0.416908547  |
| ILMN_2331492 | RCE1      | 0.416883334  |
| ILMN_1697880 | PLD2      | 0.416878358  |
| ILMN_1747303 | DDX39A    | 0.416822843  |
| ILMN_1763344 | ADCYAP1   | 0.416820344  |
| ILMN_1700028 | C9orf156  | 0.416748809  |
| ILMN_1675577 | TRMT6IA   | 0.416489355  |
| ILMN_1721008 | DILT      | 0.416402577  |
| ILMN_1679978 | WBSRCL6   | 0.416373547  |
| ILMN_2144401 | GLB1L2    | 0.416371024  |
| ILMN_1740234 | GSTO2     | 0.416369981  |
| ILMN_1683243 | VP545     | 0.416343589  |
| ILMN_1670318 | RDK1      | 0.416275145  |
| ILMN_1773163 | C19orf34  | 0.416168456  |
| ILMN_1664978 | TJP2      | 0.416161935  |
| ILMN_1769195 | KIAA0378  | 0.416125666  |
| ILMN_1700604 | RBM14     | 0.416111989  |
| ILMN_2295918 | PNCN12    | 0.416046649  |
| ILMN_2211235 | TEX101    | 0.415898961  |
| ILMN_1704055 | NOP16     | 0.415840099  |
| ILMN_1800267 | FAM13A    | 0.415828766  |
| ILMN_1659936 | PPP1R15A  | 0.41575022   |
| ILMN_3253901 | HAVCR1    | 0.415721819  |
| ILMN_1658626 | REB1      | 0.415691718  |
| ILMN_1890263 | DC10D04D  | 0.415678066  |
| ILMN_1665932 | ACCN1     | 0.415649923  |
| ILMN_2169801 | TPSAB1    | 0.415619865  |
| ILMN_3240187 | TMEM111   | 0.415577929  |
| ILMN_1726783 | RNASEH1   | 0.415568526  |
| ILMN_1708580 | PZK2LIP1  | 0.415564411  |
| ILMN_1666816 | P2RX2     | 0.415450739  |
| ILMN_2074801 | RGL3      | 0.41548742   |
| ILMN_3240475 | SDHA      | 0.415483151  |
| ILMN_1681081 | AGPAT2    | 0.415465325  |
| ILMN_1653367 | TAF12     | 0.415317256  |
| ILMN_1672462 | ARSE      | 0.415277016  |
| ILMN_1669991 | C14orf118 | 0.415265575  |
| ILMN_1714462 | MNS1      | 0.415009971  |
| ILMN_1770329 | RABGGTA   | 0.415005538  |
| ILMN_1782567 | GUCY1B3   | 0.415000165  |
| ILMN_1803647 | FAM162A   | 0.414892903  |
| ILMN_1743021 | CAMK2C    | 0.414858974  |
| ILMN_2087692 | CYBBD1    | 0.4147416146 |
| ILMN_1675024 | BEND5     | 0.414587304  |
| ILMN_2212909 | MELK      | 0.414509938  |
| ILMN_1671191 | UQCRC1    | 0.414473787  |
| ILMN_1805464 | PHTF1     | 0.414386561  |
| ILMN_1682503 | HPFY      | 0.414370776  |
| ILMN_1691611 | HNRNP112  | 0.414349057  |
| ILMN_1781966 | OSIP2     | 0.414282648  |
| ILMN_3242299 | CLDN9     | 0.414261715  |
| ILMN_1812256 | GANC      | 0.414198465  |
| ILMN_1799878 | CD101     | 0.414178911  |
| ILMN_1686461 | CADPS2    | 0.414157619  |
| ILMN_1731418 | SP110     | 0.41413833   |
| ILMN_1701424 | LAMC2     | 0.414070737  |
| ILMN_1721614 | ZNF890P   | 0.41404992   |
| ILMN_1703108 | UBE2L6    | 0.414006776  |
| ILMN_1678033 | MRII2     | 0.413988727  |
| ILMN_1685109 | POLR3D    | 0.413937659  |
| ILMN_1797184 | PKND      | 0.413915391  |
| ILMN_1810992 | CAD       | 0.413908138  |
| ILMN_3307134 | FLJ40448  | 0.413906448  |
| ILMN_1665331 | AMT       | 0.413849001  |
| ILMN_2334112 | VHSC1     | 0.413813785  |
| ILMN_1731905 | C19orf61  | 0.413803485  |
| ILMN_1832720 | BMS069J2  | 0.413713449  |
| ILMN_1887170 | BQ184605  | 0.413660415  |
| ILMN_1781236 | LOC554223 | 0.413556877  |
| ILMN_3229733 | SIGMAR1   | 0.413454571  |
| ILMN_1752199 | LHPF      | 0.413433605  |
| ILMN_3207782 | FBLX18    | 0.413425782  |
| ILMN_2233513 | LRR1Q4    | 0.413381111  |
| ILMN_1661439 | FLOT1     | 0.413378973  |
| ILMN_2376667 | POFUT2    | 0.4133605    |
| ILMN_1705876 | NAP1L1    | 0.413337337  |
| ILMN_1706545 | IRB2D1    | 0.413325048  |
| ILMN_1754894 | CLorf162  | 0.413264001  |
| ILMN_1655614 | DSP       | 0.413176835  |
| ILMN_2137312 | KCNJ5     | 0.413148378  |
| ILMN_1703100 | TUK2      | 0.413111617  |
| ILMN_1792990 | ZNF202    | 0.413083949  |
| ILMN_1711383 | STK4      | 0.413038793  |
| ILMN_1806210 | CUL9      | 0.413030991  |

|               |               |               |
|---------------|---------------|---------------|
| ILMN_1688233  | RWDD2B        | -0.715993919  |
| ILMN_2150019  | SUCLA2        | -0.716100146  |
| ILMN_1735402  | DCAI5         | -0.716623769  |
| ILMN_1790052  | MIR9-1        | -0.71669239   |
| ILMN_1663054  | TXNDCL1       | -0.716873594  |
| ILMN_1764500  | C3orf10       | -0.716933894  |
| ILMN_1789653  | PBLD          | -0.717102672  |
| ILMN_3306730  | RBM47         | -0.717355741  |
| ILMN_1712430  | ATP5G1        | -0.717686877  |
| ILMN_3309352  | PNK2          | -0.718146581  |
| ILMN_17355798 | OSBPL3        | -0.718211588  |
| ILMN_2252136  | YWHAH         | -0.71827112   |
| ILMN_2297887  | SEZGL2        | -0.718459575  |
| ILMN_3237907  | EIF2B3        | -0.718526611  |
| ILMN_1830259  | AIG508Z1      | -0.718899591  |
| ILMN_1768991  | PRCP          | -0.71931834   |
| ILMN_2202790  | MCFD2         | -0.719327928  |
| ILMN_1658499  | SVT13         | -0.719345358  |
| ILMN_1677607  | SCSDL         | -0.719346796  |
| ILMN_2079285  | ATP5L         | -0.719667563  |
| ILMN_1805147  | ACSM5         | -0.71973177   |
| ILMN_1695092  | WRB           | -0.719763406  |
| ILMN_2128087  | NAA30         | -0.71989914   |
| ILMN_1794875  | AGPAT9        | -0.720018536  |
| ILMN_3298348  | LINC0273      | -0.720026859  |
| ILMN_2085922  | WRB           | -0.720154286  |
| ILMN_3340736  | TRAPP1C10     | -0.720281747  |
| ILMN_1790105  | SUMO1         | -0.72056687   |
| ILMN_1709570  | IMMPL1        | -0.720628009  |
| ILMN_1743040  | LOC283104     | -0.720945333  |
| ILMN_2141941  | TOR1AIP1      | -0.721026826  |
| ILMN_1752810  | LARP6         | -0.721158871  |
| ILMN_1833538  | DAL17721      | -0.721261814  |
| ILMN_2260808  | MALPKAP1      | -0.721509481  |
| ILMN_1770663  | KRT24         | -0.722015888  |
| ILMN_3246534  | TSG1          | -0.722244116  |
| ILMN_1804569  | GAS2          | -0.722248036  |
| ILMN_1750901  | GNAT1         | -0.722375595  |
| ILMN_2175114  | KCNK3         | -0.722433145  |
| ILMN_1802346  | KLX10         | -0.723076529  |
| ILMN_1763539  | IER3IP1       | -0.723335782  |
| ILMN_2269092  | MANEA         | -0.723528656  |
| ILMN_1781560  | ST3GAL6       | -0.723534557  |
| ILMN_2222747  | ABRHGAP5      | -0.724163669  |
| ILMN_3246214  | R3GNT1        | -0.724242153  |
| ILMN_2227368  | SELT          | -0.724284676  |
| ILMN_2204297  | KDF2p564f1378 | -0.72483137   |
| ILMN_1779374  | AMMECR1       | -0.724588233  |
| ILMN_3234570  | CECR4         | -0.724642307  |
| ILMN_1778214  | NLR           | -0.724767479  |
| ILMN_1753868  | POTEC         | -0.724911392  |
| ILMN_2147503  | ALG13         | -0.725390812  |
| ILMN_1658809  | OSGEP1        | -0.725705911  |
| ILMN_2372403  | ALDH5A1       | -0.726012882  |
| ILMN_1869343  | D19756        | -0.726056184  |
| ILMN_3325886  | NOX4          | -0.726161816  |
| ILMN_2054053  | TMEM67        | -0.726502153  |
| ILMN_1836309  | MCF2L-AS1     | -0.726525807  |
| ILMN_1677384  | PTGER3        | -0.726730573  |
| ILMN_1773262  | ESM1          | -0.7268161    |
| ILMN_1700950  | DOB96551      | -0.726970201  |
| ILMN_1735160  | SDAD1         | -0.727162961  |
| ILMN_1732808  | TOX3          | -0.728374817  |
| ILMN_1691789  | SMNDC1        | -0.729041786  |
| ILMN_1768913  | TSN           | -0.729268559  |
| ILMN_1789684  | LCE1E         | -0.729528721  |
| ILMN_1679669  | IBTK          | -0.729542271  |
| ILMN_3309193  | RPS26         | -0.729904267  |
| ILMN_2115073  | OR105         | -0.73019223   |
| ILMN_1907620  | D8299679      | -0.730228041  |
| ILMN_1778890  | LRR1          | -0.730288954  |
| ILMN_1720617  | OR2T6         | -0.730794224  |
| ILMN_1660999  | WBP11P1       | -0.730835024  |
| ILMN_2167709  | NIP50A2A      | -0.731120061  |
| ILMN_2099586  | CCDC28B       | -0.731159031  |
| ILMN_16599749 | DSP           | -0.731183689  |
| ILMN_2175465  | RSL24D1       | -0.73156253   |
| ILMN_1789083  | GSTA3         | -0.73190857   |
| ILMN_3179275  | H03055        | -0.731915071  |
| ILMN_1651699  | EPH8          | -0.731981572  |
| ILMN_1838655  | CR614803      | -0.732132723  |
| ILMN_1815010  | RNF141        | -0.732436771  |
| ILMN_2156953  | ZFAND6        | -0.732452259  |
| ILMN_2155452  | HPR           | -0.73266241   |
| ILMN_2167911  | PSAF1         | -0.73279797   |
| ILMN_1882485  | CF55129       | -0.7323140718 |
| ILMN_1728467  | GHTM          | -0.733368883  |
| ILMN_1691106  | CDV3          | -0.733460819  |
| ILMN_1740263  | P2RX3         | -0.733993511  |
| ILMN_3270866  | TACC2         | -0.734138797  |
| ILMN_2026415  | MZT1          | -0.734739599  |
| ILMN_1652128  | LMNB1         | -0.734908864  |
| ILMN_1729509  | C1orf43       | -0.735156635  |
| ILMN_2310589  | DIABLO        | -0.735165084  |
| ILMN_1733453  | RHOQ          | -0.735645874  |
| ILMN_1812262  | DDR1          | -0.735704423  |
| ILMN_3337855  | SLC28A4       | -0.736165651  |
| ILMN_2081162  | SH3BGRL       | -0.736665401  |

|              |              |              |
|--------------|--------------|--------------|
| ILMN_2251279 | WDR45        | 0.413001807  |
| ILMN_1728272 | C14orf177    | 0.412915146  |
| ILMN_1691293 | PNF185       | 0.412863108  |
| ILMN_1702517 | COO9         | 0.412793335  |
| ILMN_1791069 | ZNF513       | 0.412742697  |
| ILMN_2125010 | SKAP2        | 0.412723112  |
| ILMN_1814282 | AEN          | 0.4126517    |
| ILMN_1660577 | ATP5G2       | 0.412629073  |
| ILMN_2180624 | TMC6D        | 0.412512026  |
| ILMN_1764980 | SEPPNAA1     | 0.412489395  |
| ILMN_2329927 | ABCG1        | 0.41241825   |
| ILMN_2117508 | CTHRC1       | 0.412364501  |
| ILMN_2199947 | REV3L        | 0.412363704  |
| ILMN_1773117 | BCOR         | 0.412338705  |
| ILMN_1771585 | GBPA         | 0.412276077  |
| ILMN_1711899 | ANKA2        | 0.412250418  |
| ILMN_1780444 | ARL3         | 0.412178211  |
| ILMN_1718734 | MLLT6        | 0.412174743  |
| ILMN_1777906 | MAP7D1       | 0.411929414  |
| ILMN_1730529 | CAB39L       | 0.411923344  |
| ILMN_1722798 | PLED3        | 0.411851052  |
| ILMN_2181445 | RCL2L13      | 0.411815473  |
| ILMN_3188269 | NA           | 0.411782518  |
| ILMN_1808568 | PYCR2        | 0.411749358  |
| ILMN_1763663 | AF086132     | 0.411621217  |
| ILMN_1756439 | SCRN1        | 0.411545364  |
| ILMN_1693141 | SHNRN        | 0.411511404  |
| ILMN_1763634 | PX14         | 0.41147932   |
| ILMN_3244216 | SCARNA3      | 0.411376797  |
| ILMN_1734827 | MK167        | 0.411370534  |
| ILMN_2105573 | CCL3L3       | 0.411298028  |
| ILMN_2133100 | LPIN2        | 0.411288098  |
| ILMN_1779095 | CEPFE        | 0.410984747  |
| ILMN_1665964 | GAB2         | 0.4109317671 |
| ILMN_1689734 | IL1RN        | 0.410891498  |
| ILMN_1799139 | PLOD2        | 0.410866597  |
| ILMN_1651373 | RHD          | 0.410863994  |
| ILMN_1772427 | ZNF101       | 0.410791455  |
| ILMN_1773125 | ENTRD1       | 0.410553766  |
| ILMN_2366654 | NESA2        | 0.410508624  |
| ILMN_1665235 | CRTPA        | 0.410503309  |
| ILMN_1797728 | HMGCS1       | 0.41038131   |
| ILMN_1741180 | HEXOC        | 0.410382821  |
| ILMN_2385305 | GPA1CH4      | 0.410293886  |
| ILMN_1765520 | MTOR2        | 0.4102457201 |
| ILMN_2155228 | ORL1F3       | 0.410174422  |
| ILMN_1731048 | TLR1         | 0.410109779  |
| ILMN_1790309 | PINK1        | 0.41010686   |
| ILMN_1909156 | SNORD123     | 0.41009519   |
| ILMN_1745420 | PHF19        | 0.410075817  |
| ILMN_1741755 | TRIM29       | 0.410053217  |
| ILMN_1679483 | INTS10       | 0.410032522  |
| ILMN_1768062 | ADK          | 0.409875245  |
| ILMN_3247018 | E1F4A1       | 0.409817488  |
| ILMN_1682812 | C21orf33     | 0.409784381  |
| ILMN_2346401 | AIF1L        | 0.409793551  |
| ILMN_1733538 | RCS10        | 0.409647598  |
| ILMN_1815292 | RPL7         | 0.409442097  |
| ILMN_1806432 | NTSC         | 0.409432724  |
| ILMN_2363586 | SDCBP        | 0.40937849   |
| ILMN_1724540 | AKL1         | 0.409310257  |
| ILMN_1757262 | ZBTB5        | 0.409248006  |
| ILMN_1752967 | DHPS         | 0.409186474  |
| ILMN_1813503 | SEMA6C       | 0.40914921   |
| ILMN_1685124 | TCTN1        | 0.409092819  |
| ILMN_1747159 | OGDH         | 0.409020755  |
| ILMN_1668526 | GVIN1        | 0.408997173  |
| ILMN_1778168 | ELMO2        | 0.408853353  |
| ILMN_1670798 | TIK9         | 0.408809964  |
| ILMN_3287493 | PPIA         | 0.408760439  |
| ILMN_1671045 | RP53A        | 0.408725844  |
| ILMN_1810239 | BAMF         | 0.408636805  |
| ILMN_2133187 | PRSS53       | 0.408524471  |
| ILMN_1791127 | CWH12        | 0.408487957  |
| ILMN_2217661 | SREBF2       | 0.408428057  |
| ILMN_1806463 | CTAGE6P      | 0.408341038  |
| ILMN_2401964 | CDC42EP1     | 0.408313238  |
| ILMN_2145670 | TNC          | 0.408273732  |
| ILMN_1709471 | CNTNA7       | 0.408259626  |
| ILMN_1781265 | ZNF503       | 0.408231986  |
| ILMN_1746924 | ZNF610       | 0.408198892  |
| ILMN_1773388 | C13orf18     | 0.408191957  |
| ILMN_1762080 | JMY          | 0.408164044  |
| ILMN_1796106 | MGAT4B       | 0.408146464  |
| ILMN_2140342 | CCDC57       | 0.408084947  |
| ILMN_3274814 | LOC100133286 | 0.407966211  |
| ILMN_3234124 | C17orf101    | 0.407952894  |
| ILMN_2395389 | PSMC4        | 0.407942487  |
| ILMN_3304203 | CLEC2D       | 0.407924469  |
| ILMN_3308678 | MIR412       | 0.407919659  |
| ILMN_1691631 | PIDN16       | 0.407892923  |
| ILMN_2233454 | SPTLC3       | 0.407771334  |
| ILMN_3235404 | SNORA57      | 0.407766818  |
| ILMN_1728711 | RGS3         | 0.407742429  |
| ILMN_2415144 | SP110        | 0.407670521  |
| ILMN_2214910 | EPH84        | 0.407625365  |
| ILMN_1655514 | RIBN4        | 0.407581306  |
| ILMN_3248948 | LOC100272216 | 0.407576364  |

|              |              |               |
|--------------|--------------|---------------|
| ILMN_2158587 | EEF1E1       | -0.737038237  |
| ILMN_1698894 | OR5A51       | -0.737258149  |
| ILMN_2100815 | TMEM98       | -0.737418484  |
| ILMN_1767643 | CTRB2        | -0.737439714  |
| ILMN_2371825 | AGL          | -0.737566983  |
| ILMN_2316918 | PANK1        | -0.73779279   |
| ILMN_1831258 | AKO94576     | -0.73794875   |
| ILMN_1741564 | DCFN1        | -0.738644266  |
| ILMN_2148497 | C20orf107    | -0.738997964  |
| ILMN_2323366 | SDHC         | -0.739097562  |
| ILMN_1664718 | CYP51A1      | -0.739125888  |
| ILMN_3242494 | FLJ41484     | -0.739263731  |
| ILMN_3234746 | NA           | -0.739461375  |
| ILMN_2380181 | MAG          | -0.739653908  |
| ILMN_1777366 | ITIC35       | -0.739662006  |
| ILMN_1694106 | GPD1L        | -0.739747042  |
| ILMN_1786543 | MUC5B        | -0.739747968  |
| ILMN_2377829 | NANOS1       | -0.739792715  |
| ILMN_1886050 | CR622587     | -0.73983979   |
| ILMN_2043809 | PFKM         | -0.740001867  |
| ILMN_1661491 | SH3GL2       | -0.740011054  |
| ILMN_1802808 | FP15737      | -0.740097295  |
| ILMN_1662168 | SP3          | -0.740613424  |
| ILMN_1706005 | GALT         | -0.740749874  |
| ILMN_1685781 | C14orf142    | -0.740824685  |
| ILMN_1877039 | BUB8876      | -0.740899534  |
| ILMN_1705049 | TMEM87       | -0.741356143  |
| ILMN_1788961 | PPP2R2A      | -0.74160591   |
| ILMN_1722643 | DRP6         | -0.741630398  |
| ILMN_1803824 | ZDHC9        | -0.741845395  |
| ILMN_1712943 | CCK          | -0.742137193  |
| ILMN_2383077 | SLC39A7      | -0.742402856  |
| ILMN_2039159 | BC151443     | -0.742518569  |
| ILMN_1660043 | UBXN11       | -0.742576659  |
| ILMN_1685854 | CsorF53      | -0.742602851  |
| ILMN_1724504 | SETD3        | -0.742768863  |
| ILMN_2358628 | ADK          | -0.742769936  |
| ILMN_1776601 | ORH5         | -0.742954376  |
| ILMN_1802071 | KX112399     | -0.743113219  |
| ILMN_1655590 | LOC100506085 | -0.743282002  |
| ILMN_1741431 | ACC2         | -0.743517723  |
| ILMN_1735445 | SLECTA9      | -0.743699294  |
| ILMN_3212469 | LOC401561    | -0.74392639   |
| ILMN_1810120 | SYT7         | -0.743981994  |
| ILMN_2348857 | IL20         | -0.74401187   |
| ILMN_3251436 | DENDN4C      | -0.744445317  |
| ILMN_1842533 | AL117577     | -0.7445097251 |
| ILMN_3286679 | NA           | -0.744804031  |
| ILMN_2406304 | PDR2R3       | -0.744916125  |
| ILMN_1651108 | RESF18       | -0.745053982  |
| ILMN_1730229 | CGN11        | -0.745293418  |
| ILMN_1763269 | TNKS2        | -0.745798153  |
| ILMN_1904578 | ODZ1         | -0.74590827   |
| ILMN_1682495 | FOXP1        | -0.74638425   |
| ILMN_1765204 | ST13         | -0.746488289  |
| ILMN_2079803 | LSM14A       | -0.746988651  |
| ILMN_1753296 | MYO15        | -0.747224524  |
| ILMN_1777917 | DSR10        | -0.747343724  |
| ILMN_2188959 | ACOT2        | -0.747398355  |
| ILMN_3272424 | HNRNPA1      | -0.747675338  |
| ILMN_2039380 | TMEM388      | -0.748306448  |
| ILMN_1681154 | ZBTB39       | -0.748469788  |
| ILMN_1685796 | CSD1E        | -0.748564037  |
| ILMN_1711919 | SCY12        | -0.748857512  |
| ILMN_2408001 | RFWD2        | -0.748954291  |
| ILMN_1681249 | KIF21A       | -0.748961535  |
| ILMN_1916137 | BFS13551     | -0.749921818  |
| ILMN_2029027 | RPS26        | -0.750121149  |
| ILMN_2059452 | SLC12A2      | -0.750134815  |
| ILMN_1764091 | R3HDM2       | -0.750316321  |
| ILMN_1656869 | LGALS9C      | -0.750392198  |
| ILMN_2145044 | FAM173B      | -0.750996216  |
| ILMN_2301658 | VAD1C        | -0.751802861  |
| ILMN_1769299 | MTFR11       | -0.7521219059 |
| ILMN_1707434 | FP15737      | -0.752670961  |
| ILMN_1786361 | ROD1         | -0.752780814  |
| ILMN_3256693 | AK130189     | -0.752926813  |
| ILMN_1658015 | MBNL2        | -0.753143956  |
| ILMN_1745991 | GNRH1        | -0.753259883  |
| ILMN_1686066 | TPS3BP2      | -0.753614105  |
| ILMN_1892506 | CACNA1C      | -0.753747847  |
| ILMN_2102515 | PGAM4        | -0.754053821  |
| ILMN_3241354 | FLJ00317     | -0.754420752  |
| ILMN_2076250 | GPBP11       | -0.75449109   |
| ILMN_1765866 | BTBD11       | -0.754664535  |
| ILMN_1745079 | TRIM2        | -0.7546998    |
| ILMN_1684885 | ACSL1        | -0.754759493  |
| ILMN_3280269 | FLJ00317     | -0.75552146   |
| ILMN_1931500 | DA455367     | -0.755994796  |
| ILMN_1750262 | BC132949     | -0.756531771  |
| ILMN_3033146 | C20orf90     | -0.756669652  |
| ILMN_1762993 | PIGV         | -0.756668358  |
| ILMN_1814173 | SMARCA4      | -0.756958143  |
| ILMN_1739586 | FEZ2         | -0.757033392  |
| ILMN_1878670 | BC088609     | -0.757132079  |
| ILMN_1658940 | DDX25        | -0.757134992  |
| ILMN_1778611 | GBAS         | -0.757374514  |
| ILMN_1727343 | ROD1         | -0.757620689  |



|              |                  |             |
|--------------|------------------|-------------|
| ILMN_1676318 | BAZZA            | 0.40751374  |
| ILMN_1656886 | LIN37            | 0.407509012 |
| ILMN_1661554 | DIAPH1           | 0.407324486 |
| ILMN_2255256 | MARVELD3         | 0.407287878 |
| ILMN_1708950 | ASPHD1           | 0.407043869 |
| ILMN_1678052 | C19orf24         | 0.407043765 |
| ILMN_3287239 | FABP5            | 0.406970233 |
| ILMN_2280960 | DEPDC7           | 0.406960845 |
| ILMN_2195438 | XORF37           | 0.406927795 |
| ILMN_1694070 | FAM114A1         | 0.406821256 |
| ILMN_1760049 | SERGEF           | 0.406877202 |
| ILMN_2299843 | ATP55            | 0.406832225 |
| ILMN_3307738 | FSO2             | 0.406666175 |
| ILMN_1711208 | CELSR2           | 0.406657608 |
| ILMN_2377109 | LCK              | 0.406640414 |
| ILMN_1797804 | BACE1            | 0.406605837 |
| ILMN_1764239 | PMPCA            | 0.406595266 |
| ILMN_3244348 | TAF1D            | 0.406562126 |
| ILMN_1744914 | FUCA2            | 0.406483114 |
| ILMN_2318638 | TGIF1            | 0.406477174 |
| ILMN_1704500 | STAP2            | 0.406423411 |
| ILMN_1664525 | P2RY13           | 0.406296434 |
| ILMN_1697054 | LRRN4CL          | 0.406263565 |
| ILMN_1688938 | KCNRG            | 0.405997197 |
| ILMN_1673172 | IFTS2            | 0.405956181 |
| ILMN_1721684 | FAM20C           | 0.405926667 |
| ILMN_1716195 | HST1H2BG         | 0.405905865 |
| ILMN_1696243 | FLJ2152          | 0.405848487 |
| ILMN_1775743 | BTG1             | 0.405825512 |
| ILMN_2155025 | ZNF681           | 0.405824456 |
| ILMN_1807359 | CLEC11A          | 0.405732511 |
| ILMN_1682326 | CLDN15           | 0.405705457 |
| ILMN_1760556 | BCO1B43          | 0.405682625 |
| ILMN_1702866 | RP11-206L10.16-C | 0.405437389 |
| ILMN_1658504 | CHKA             | 0.405389534 |
| ILMN_3281195 | SLC16A6          | 0.405385052 |
| ILMN_1713751 | ADAM19           | 0.40533434  |
| ILMN_1746138 | RILTR            | 0.405328433 |
| ILMN_2044027 | C20orf191        | 0.405113556 |
| ILMN_1751289 | CHTF8            | 0.405043161 |
| ILMN_1727577 | GLI2             | 0.405032249 |
| ILMN_3219197 | HNRNP1A1         | 0.404992504 |
| ILMN_1852384 | ELKS             | 0.404979368 |
| ILMN_1719661 | SEPK1            | 0.404964697 |
| ILMN_1735502 | FAM181B          | 0.40493402  |
| ILMN_1655093 | HNG5             | 0.404892367 |
| ILMN_1789535 | DHDDS            | 0.404771405 |
| ILMN_2067032 | TRAF3IP1         | 0.404603678 |
| ILMN_1733254 | WDR93            | 0.404589808 |
| ILMN_1803690 | GLI1P1           | 0.404561844 |
| ILMN_1737631 | PAQR6            | 0.404498646 |
| ILMN_1777564 | MAD2L1           | 0.404457821 |
| ILMN_2133316 | GIMAP7           | 0.40444558  |
| ILMN_1673933 | NPIP             | 0.40436311  |
| ILMN_1664307 | COO6             | 0.404356219 |
| ILMN_1703906 | HUWRP            | 0.404313141 |
| ILMN_1656830 | C10orf26         | 0.404293254 |
| ILMN_1710734 | GZMK             | 0.404269335 |
| ILMN_1723018 | ZNF117           | 0.404194553 |
| ILMN_1670304 | FAM156A          | 0.404126289 |
| ILMN_1693060 | VEGFA            | 0.404018015 |
| ILMN_2166276 | C15orf56         | 0.403953186 |
| ILMN_1690907 | CCR6             | 0.403907631 |
| ILMN_2364521 | AXL              | 0.403702165 |
| ILMN_1799280 | BDH1             | 0.403676193 |
| ILMN_1803143 | SYVN1            | 0.403640521 |
| ILMN_1696308 | RP33A            | 0.403593987 |
| ILMN_1750423 | ZKSCAN5          | 0.403503513 |
| ILMN_1772644 | EML3             | 0.403489393 |
| ILMN_2083333 | PMS2L5           | 0.403427895 |
| ILMN_1766370 | PHLDB3           | 0.403349958 |
| ILMN_1757350 | CTNNB1           | 0.403230567 |
| ILMN_1796508 | TOPMT            | 0.403108708 |
| ILMN_1676470 | TCF7             | 0.403070695 |
| ILMN_1708833 | APCS             | 0.403064865 |
| ILMN_2287147 | UBTF             | 0.403017829 |
| ILMN_1898124 | C7orf40          | 0.402979932 |
| ILMN_1692200 | LOC134466        | 0.402978106 |
| ILMN_3243069 | CKK1A            | 0.402824749 |
| ILMN_2200723 | FER1L4           | 0.402749127 |
| ILMN_2198516 | ARRDC3           | 0.402699702 |
| ILMN_1675737 | PCDH10           | 0.402674873 |
| ILMN_1765791 | C9orf79          | 0.402646931 |
| ILMN_1688070 | WBSCR20C         | 0.402587165 |
| ILMN_1669335 | RUNX1            | 0.402520897 |
| ILMN_3242753 | NBP1             | 0.402488499 |
| ILMN_1684210 | NIPAL3           | 0.402490138 |
| ILMN_3223826 | SPNS2            | 0.402460189 |
| ILMN_1676241 | BCOR             | 0.402433806 |
| ILMN_2394276 | DST              | 0.402391859 |
| ILMN_1702738 | KLC3             | 0.40233499  |
| ILMN_1702691 | TNFAIP3          | 0.402302065 |
| ILMN_2213834 | PROX2            | 0.402257102 |
| ILMN_1655913 | NUCB2            | 0.402210954 |
| ILMN_2296037 | PTPN2            | 0.402085127 |
| ILMN_1677318 | MARCKS           | 0.402051508 |
| ILMN_2238710 | PDCD5            | 0.401963406 |
| ILMN_1672660 | MBP              | 0.401959967 |

|              |           |               |
|--------------|-----------|---------------|
| ILMN_1791925 | NFAM1     | -0.75780269   |
| ILMN_1728907 | SCAMP1    | -0.758188603  |
| ILMN_1690689 | AKO27883  | -0.7584805    |
| ILMN_1742837 | DIG1      | -0.758650252  |
| ILMN_1719085 | FEM1A     | -0.758895213  |
| ILMN_2380999 | REQLQ     | -0.759172209  |
| ILMN_1809245 | PITPNB    | -0.759244805  |
| ILMN_1675365 | LARR4     | -0.759512819  |
| ILMN_2192001 | NA        | -0.759545447  |
| ILMN_1707475 | UBE2E2    | -0.759592022  |
| ILMN_2193936 | HRG       | -0.75990535   |
| ILMN_1773742 | DNAJB9    | -0.760292452  |
| ILMN_2172221 | SUMO1P3   | -0.760880029  |
| ILMN_2222992 | ETF1      | -0.761297443  |
| ILMN_1669484 | WDR6      | -0.76162116   |
| ILMN_1781039 | VPS26A    | -0.761975523  |
| ILMN_2406815 | LRRCL17   | -0.762027455  |
| ILMN_1697704 | KRTAP12-2 | -0.762044289  |
| ILMN_1802649 | C11orf58  | -0.762565395  |
| ILMN_1790036 | C20orf202 | -0.762883069  |
| ILMN_1660732 | PPP2R2B   | -0.762982666  |
| ILMN_1684650 | PKAR2B    | -0.763044452  |
| ILMN_2285375 | SORD      | -0.763123994  |
| ILMN_1749317 | C1orf222  | -0.76403293   |
| ILMN_2327276 | STAU1     | -0.764392346  |
| ILMN_2163306 | FAM120A   | -0.764653795  |
| ILMN_2223810 | VBP1      | -0.76474172   |
| ILMN_1776493 | MTUS1     | -0.764839009  |
| ILMN_2221408 | ARFGEF1   | -0.765175691  |
| ILMN_1764380 | GLTP      | -0.766416198  |
| ILMN_2369104 | TRAPPC8B  | -0.766684695  |
| ILMN_2095840 | MYT3      | -0.766861299  |
| ILMN_1657482 | MYO10     | -0.767035166  |
| ILMN_1756550 | NLUP2CL   | -0.768390815  |
| ILMN_2230579 | RABGEF1   | -0.76869827   |
| ILMN_1797925 | MOCS2     | -0.768725467  |
| ILMN_1710026 | RNF133    | -0.769056897  |
| ILMN_1612000 | NA        | -0.769174988  |
| ILMN_1660635 | LACTB2    | -0.769397989  |
| ILMN_1762330 | C1D       | -0.76986368   |
| ILMN_2151441 | FAM103A1  | -0.770111319  |
| ILMN_1769024 | FAM41C    | -0.770290993  |
| ILMN_1656285 | METTL7A   | -0.771005151  |
| ILMN_249343  | FIGLN2    | -0.771006361  |
| ILMN_1674016 | NA        | -0.771534905  |
| ILMN_2134888 | TUBE1     | -0.772265903  |
| ILMN_3308788 | SNORD50A  | -0.77238174   |
| ILMN_1651604 | MARK4     | -0.773117892  |
| ILMN_1754441 | LRRCL10B  | -0.773916435  |
| ILMN_2344449 | SNORD59   | -0.774213193  |
| ILMN_2171384 | CXCL5     | -0.774607546  |
| ILMN_1674021 | LOC401321 | -0.775449933  |
| ILMN_3309114 | KRTAP20-3 | -0.776023619  |
| ILMN_2134039 | ACN9      | -0.776184095  |
| ILMN_2337941 | COFS8     | -0.776457742  |
| ILMN_1732216 | NARS      | -0.776962162  |
| ILMN_1694923 | PTPN9     | -0.777146774  |
| ILMN_1736054 | SUB1      | -0.777187172  |
| ILMN_1751061 | C16orf54  | -0.77787703   |
| ILMN_1756779 | CLTC      | -0.779508245  |
| ILMN_1678522 | RP526     | -0.77975789   |
| ILMN_2272748 | SLAMF9    | -0.77986362   |
| ILMN_1692511 | TNEM106C  | -0.781010492  |
| ILMN_1785218 | MTCH2     | -0.78107202   |
| ILMN_1759973 | NDUFAS    | -0.781445489  |
| ILMN_2215194 | GCLC      | -0.782258516  |
| ILMN_1865013 | CN291296  | -0.782347743  |
| ILMN_1746661 | SNRPN     | -0.78265398   |
| ILMN_1681959 | AKAP2     | -0.782849796  |
| ILMN_2313434 | TCP1      | -0.784643322  |
| ILMN_1765401 | RRN3      | -0.785794801  |
| ILMN_2359287 | ITGA6     | -0.786322301  |
| ILMN_2272766 | TNEM35    | -0.786451422  |
| ILMN_3192034 | NA        | -0.7865865061 |
| ILMN_2198239 | HGD       | -0.786728237  |
| ILMN_1809259 | HRASL52   | -0.786742973  |
| ILMN_1807095 | MRPS36    | -0.78688877   |
| ILMN_1811592 | ARHGAP21  | -0.787212462  |
| ILMN_2284810 | CIDEA     | -0.787684481  |
| ILMN_1778171 | AK3       | -0.788523566  |
| ILMN_1708660 | RWD04     | -0.788641301  |
| ILMN_1905546 | AKO55145  | -0.78881069   |
| ILMN_2188722 | GLS       | -0.788822778  |
| ILMN_2215570 | WWP1      | -0.78931029   |
| ILMN_1792056 | ZNF318    | -0.789486737  |
| ILMN_2175552 | KIF18     | -0.789951868  |
| ILMN_2394613 | C1D       | -0.790057664  |
| ILMN_1766103 | KCNK18    | -0.790345375  |
| ILMN_1730572 | HNRPPD    | -0.791048926  |
| ILMN_1788778 | sept-11   | -0.793362055  |
| ILMN_1805251 | MCC34484  | -0.793830336  |
| ILMN_2246510 | TSC1      | -0.794241397  |
| ILMN_1759396 | NNT       | -0.794401038  |
| ILMN_1776334 | UXS1      | -0.794470701  |
| ILMN_2413264 | SOC54     | -0.794549848  |
| ILMN_3270993 | ALS82488  | -0.794620323  |
| ILMN_2344204 | PRK13     | -0.795313745  |
| ILMN_3187903 | ALS82488  | -0.797465268  |

|              |           |              |
|--------------|-----------|--------------|
| ILMN_1714965 | NFKB1     | 0.40187973   |
| ILMN_1662944 | PON1      | 0.401782278  |
| ILMN_2194049 | EFHD      | 0.401736038  |
| ILMN_1658016 | ZNF31     | 0.401688569  |
| ILMN_2095570 | OGFR1     | 0.401631444  |
| ILMN_1736013 | CIB3      | 0.401588615  |
| ILMN_1712532 | CARD9     | 0.401558257  |
| ILMN_1766363 | FLT3      | 0.401536338  |
| ILMN_1759787 | THBD      | 0.401464972  |
| ILMN_2328293 | LOC349114 | 0.401422607  |
| ILMN_1748189 | RTBDN     | 0.401405078  |
| ILMN_3251303 | NR2C2     | 0.401381739  |
| ILMN_2245676 | BTF3      | 0.401374927  |
| ILMN_1704785 | C10orf125 | 0.401352794  |
| ILMN_1653771 | WDR63     | 0.401337562  |
| ILMN_2405642 | DHDOS     | 0.401313587  |
| ILMN_1773935 | TMEM165   | 0.401284349  |
| ILMN_1717639 | SIK1      | 0.401187472  |
| ILMN_2217601 | ANKA9     | 0.401145599  |
| ILMN_1657593 | ADNP      | 0.401080204  |
| ILMN_1702177 | GIG1      | 0.401075015  |
| ILMN_1676062 | DIP2C     | 0.401061907  |
| ILMN_1898518 | GFR1A     | 0.400969266  |
| ILMN_1804207 | MRRPL4    | 0.400958768  |
| ILMN_1657505 | HR        | 0.400915554  |
| ILMN_1678692 | MRRP1P    | 0.400886478  |
| ILMN_1726930 | C5orf144  | 0.400794654  |
| ILMN_1753795 | SOC54     | 0.400718151  |
| ILMN_3249456 | LOC96610  | 0.4006610434 |
| ILMN_1663370 | CCDC62    | 0.400555888  |
| ILMN_1652209 | BMS1      | 0.400523639  |
| ILMN_1806304 | ENTP4     | 0.400491846  |
| ILMN_1725987 | SIC       | 0.400419869  |
| ILMN_1733937 | NMMD      | 0.400334907  |
| ILMN_1704985 | CYP27A1   | 0.400250794  |
| ILMN_1700727 | KLFG      | 0.400229946  |
| ILMN_1692198 | GTF2IRD1  | 0.400224843  |
| ILMN_1705442 | CTM3      | 0.400176466  |
| ILMN_1805395 | LTP3      | 0.400020343  |

|              |           |              |
|--------------|-----------|--------------|
| ILMN_2093674 | GMFB      | -0.798299812 |
| ILMN_3249654 | UCX       | -0.799724084 |
| ILMN_3200717 | LOC44387  | -0.799926392 |
| ILMN_1705549 | FRLN2     | -0.80194161  |
| ILMN_2221066 | VDAC2     | -0.800260094 |
| ILMN_1720482 | CEND1     | -0.802347977 |
| ILMN_1652163 | DVL2      | -0.802656954 |
| ILMN_1652638 | LRRCS8    | -0.803026807 |
| ILMN_1680389 | OR10AD1   | -0.803450743 |
| ILMN_1701512 | KIAA0391  | -0.803532084 |
| ILMN_1909889 | CB243773  | -0.804864023 |
| ILMN_1775171 | WIPF2     | -0.804895657 |
| ILMN_1696702 | NEO1      | -0.805038926 |
| ILMN_2284077 | SLC38A8   | -0.805180114 |
| ILMN_1718932 | MTRR      | -0.805629801 |
| ILMN_1709815 | PURG      | -0.806617311 |
| ILMN_3239912 | HSPY1     | -0.806774923 |
| ILMN_3244060 | LOC285205 | -0.808401089 |
| ILMN_1826572 | AKO94562  | -0.808461176 |
| ILMN_1785389 | ABHD2     | -0.809609092 |
| ILMN_1829989 | LOC229930 | -0.810266443 |
| ILMN_3238359 | NAV3      | -0.810515591 |
| ILMN_2355033 | KIAA1147  | -0.811172337 |
| ILMN_2259949 | BCKDH8    | -0.811634979 |
| ILMN_1808379 | PLCD4     | -0.81383001  |
| ILMN_1718619 | TRM11     | -0.817204603 |
| ILMN_1793651 | UBE2W     | -0.81749882  |
| ILMN_1726054 | ZBTB7B    | -0.817897689 |
| ILMN_1752283 | ITCH      | -0.818069413 |
| ILMN_1748251 | ABHD2     | -0.820269873 |
| ILMN_1827211 | U43604    | -0.821337609 |
| ILMN_1669103 | AKO21896  | -0.821845257 |
| ILMN_1749244 | LYRM1     | -0.821885934 |
| ILMN_1750861 | PML       | -0.82221399  |
| ILMN_3232806 | HGD1A     | -0.822356102 |
| ILMN_1693882 | TAPT1     | -0.823485228 |
| ILMN_2375879 | VEGFA     | -0.823712042 |
| ILMN_1745343 | ZMAT2     | -0.825210872 |
| ILMN_1652417 | LORPNC    | -0.826663351 |
| ILMN_2331266 | NUMB      | -0.827710556 |
| ILMN_2387952 | FAM134B   | -0.831814948 |
| ILMN_1718520 | RNL5      | -0.835208267 |
| ILMN_2050911 | SLC22A4   | -0.835792253 |
| ILMN_2183885 | C7orf11   | -0.836062476 |
| ILMN_1651310 | MILT4     | -0.840651749 |
| ILMN_3294965 | RRAS2     | -0.841742351 |
| ILMN_1662675 | ADAM2     | -0.842496823 |
| ILMN_2183772 | CCDC121   | -0.842566886 |
| ILMN_1771061 | BRD4      | -0.845123465 |
| ILMN_2078074 | MUT       | -0.851181038 |
| ILMN_1720889 | SC4MOL    | -0.852501908 |
| ILMN_1787657 | CDK14     | -0.853745374 |
| ILMN_3229770 | SKP1      | -0.853831512 |
| ILMN_2163796 | RABGGB    | -0.856266308 |
| ILMN_1689574 | SLC25A33  | -0.859615162 |
| ILMN_1807448 | FAM8A1    | -0.861852083 |
| ILMN_1687074 | ITGA6     | -0.861208861 |
| ILMN_1757693 | C17orf51  | -0.863591907 |
| ILMN_1746426 | TOMM70A   | -0.869757538 |
| ILMN_1803882 | VEGFA     | -0.870060495 |
