# Supplementary material for: Intrarenal activation of adaptive immune effectors is associated with tubular damage and impaired renal function in lupus nephritis
Source: PubMed Central journal article supplement (PMC6241616; doi:10.1136/annrheumdis-2018-213485), 2018-07-31
Supplement: annrheumdis-2018-213485supp009.pdf [file annrheumdis-2018-213485supp009.pdf]

Supplementary Table 6 : Transcripts and DAVID pathways correlating with the expression of CD19 in lupus kidney biopsies

Positive correlation

| Transcripts   | Pathways     |                                   |                      |                                                                                    |       |          |           |
|---------------|--------------|-----------------------------------|----------------------|------------------------------------------------------------------------------------|-------|----------|-----------|
| Identifier    | Gene Symbol  | Correlation coefficient with CD19 | Annotation Cluster 1 | Enrichment Score: 1.59                                                             | Count | P_Value  | Benjamini |
| ILMN_1782704  | CD19         | 1                                 | GOTERM_BP_FAT        | <a href="#">positive regulation of response to stimulus</a>                        | 15    | 3.20E-04 | 4.20E-01  |
| ILMN_1670796  | EXOC10       | 0.702812214                       | GOTERM_BP_FAT        | <a href="#">immune response-activating cell surface receptor signaling pathway</a> | 6     | 1.10E-03 | 4.60E-01  |
| ILMN_1707467  | CD19         | 0.67181409                        | GOTERM_BP_FAT        | <a href="#">immune response-activating cell surface receptor signaling pathway</a> | 6     | 1.10E-03 | 4.60E-01  |
| ILMN_1744604  | CSA2G        | 0.661518537                       | GOTERM_BP_FAT        | <a href="#">immune response-activating signal transduction</a>                     | 6     | 3.90E-03 | 6.20E-01  |
| ILMN_1801639  | IARS         | 0.65669978                        | GOTERM_BP_FAT        | <a href="#">antigen receptor-mediated signaling pathway</a>                        | 5     | 4.20E-03 | 6.00E-01  |
| ILMN_1710738  | RC3H2        | 0.639705115                       | GOTERM_BP_FAT        | <a href="#">immune response-regulating signal transduction</a>                     | 6     | 5.30E-03 | 6.10E-01  |
| ILMN_1676649  | AQP4         | 0.636286637                       | GOTERM_BP_FAT        | <a href="#">positive regulation of immune response</a>                             | 9     | 9.20E-03 | 6.30E-01  |
| ILMN_1737005  | C19orf61     | 0.629717163                       | GOTERM_BP_FAT        | <a href="#">immune system development</a>                                          | 3     | 1.10E-02 | 6.40E-01  |
| ILMN_2067895  | CXCL11       | 0.611598413                       | GOTERM_BP_FAT        | <a href="#">B cell receptor signaling pathway</a>                                  | 3     | 1.30E-02 | 6.70E-01  |
| ILMN_1692100  | ZNFX5        | 0.603116686                       | GOTERM_BP_FAT        | <a href="#">hemopoiesis</a>                                                        | 11    | 2.20E-02 | 7.60E-01  |
| ILMN_2343105  | UPI1         | 0.600465605                       | GOTERM_BP_FAT        | <a href="#">hemopoiesis activation</a>                                             | 11    | 2.50E-02 | 7.70E-01  |
| ILMN_2324989  | HEBP         | 0.597809229                       | GOTERM_BP_FAT        | <a href="#">hemopoiesis in lymphoid organ development</a>                          | 11    | 3.80E-02 | 8.30E-01  |
| ILMN_1792800  | LCN6         | 0.59731921                        | GOTERM_BP_FAT        | <a href="#">lymphocyte differentiation</a>                                         | 6     | 4.20E-02 | 8.30E-01  |
| ILMN_1762233  | EFCAB5       | 0.596276524                       | GOTERM_BP_FAT        | <a href="#">lymphocyte activation</a>                                              | 9     | 4.90E-02 | 8.60E-01  |
| ILMN_1693909  | FGI2         | 0.588673504                       | GOTERM_BP_FAT        | <a href="#">positive regulation of immune system process</a>                       | 10    | 5.20E-02 | 8.50E-01  |
| ILMN_1654504  | LEC7A        | 0.58445182                        | GOTERM_BP_FAT        | <a href="#">cell activation</a>                                                    | 11    | 6.60E-02 | 8.60E-01  |
| ILMN_2323992  | CLEC7A       | 0.582179211                       | GOTERM_BP_FAT        | <a href="#">T cell activation</a>                                                  | 6     | 1.10E-01 | 9.10E-01  |
| ILMN_1679428  | CH2C         | 0.580816001                       | GOTERM_BP_FAT        | <a href="#">B cell activation</a>                                                  | 5     | 1.50E-01 | 9.40E-01  |
| ILMN_1714709  | OLFM1        | 0.580398138                       | GOTERM_BP_FAT        | <a href="#">B cell activation</a>                                                  | 4     | 2.00E-01 | 9.50E-01  |
| ILMN_1811650  | DUS2L        | 0.579509835                       | GOTERM_BP_FAT        | <a href="#">B cell-mediated immunity</a>                                           | 4     | 2.50E-01 | 9.60E-01  |
| ILMN_1801214  | KIAA1826     | 0.577368078                       | GOTERM_BP_FAT        | <a href="#">B cell differentiation</a>                                             | 5     | 2.70E-01 | 9.70E-01  |
| ILMN_1675583  | SPG7         | 0.574873335                       | GOTERM_BP_FAT        | <a href="#">myeloid cell maturation</a>                                            | 4     | 2.90E-01 | 9.70E-01  |
| ILMN_1702861  | SGCD         | 0.573883839                       | GOTERM_BP_FAT        | <a href="#">T cell differentiation</a>                                             | 3     | 3.80E-01 | 9.80E-01  |
| ILMN_1727578  | DNF2p6E14208 | 0.571462004                       |                      |                                                                                    |       |          |           |
| ILMN_1813836  | DARS         | 0.571423103                       |                      |                                                                                    |       |          |           |
| ILMN_18178043 | BEND7        | 0.57109928                        |                      |                                                                                    |       |          |           |
| ILMN_1795939  | BOLL         | 0.567126703                       |                      |                                                                                    |       |          |           |
| ILMN_1715526  | SMAD3        | 0.565537039                       |                      |                                                                                    |       |          |           |
| ILMN_2264788  | PPP2R2B      | 0.564927962                       |                      |                                                                                    |       |          |           |
| ILMN_3248521  | UBXN8        | 0.562552263                       |                      |                                                                                    |       |          |           |
| ILMN_1793476  | PKCDBP       | 0.562535933                       |                      |                                                                                    |       |          |           |
| ILMN_1669497  | OSBP1L       | 0.562041021                       |                      |                                                                                    |       |          |           |
| ILMN_1700510  | CLEC7A       | 0.561024471                       |                      |                                                                                    |       |          |           |
| ILMN_2370692  | ANZF1        | 0.560713765                       |                      |                                                                                    |       |          |           |
| ILMN_1782729  | CLEC11       | 0.559580851                       |                      |                                                                                    |       |          |           |
| ILMN_2063925  | CTNBL1       | 0.558651714                       |                      |                                                                                    |       |          |           |
| ILMN_2228155  | OR175        | 0.557469081                       |                      |                                                                                    |       |          |           |
| ILMN_1790780  | HEP7         | 0.556295205                       |                      |                                                                                    |       |          |           |
| ILMN_2345650  | DUSP22       | 0.551687061                       |                      |                                                                                    |       |          |           |
| ILMN_2048822  | NUDC2        | 0.5503595                         |                      |                                                                                    |       |          |           |
| ILMN_1751141  | RG512        | 0.550235013                       |                      |                                                                                    |       |          |           |
| ILMN_1761069  | UVVAG        | 0.549976948                       |                      |                                                                                    |       |          |           |
| ILMN_1737441  | H4I19        | 0.547914182                       |                      |                                                                                    |       |          |           |
| ILMN_1662843  | CD53         | 0.547048404                       |                      |                                                                                    |       |          |           |
| ILMN_1705093  | ORCS         | 0.544483991                       |                      |                                                                                    |       |          |           |
| ILMN_3237878  | LIRA3        | 0.54378515                        |                      |                                                                                    |       |          |           |
| ILMN_3247679  | SNORA52      | 0.543084213                       |                      |                                                                                    |       |          |           |
| ILMN_2310005  | HEBP7E       | 0.542495963                       |                      |                                                                                    |       |          |           |
| ILMN_2391912  | SEC14L1      | 0.542677621                       |                      |                                                                                    |       |          |           |
| ILMN_3187210  | LOC100129186 | 0.541839661                       |                      |                                                                                    |       |          |           |
| ILMN_1716195  | HST1H2BG     | 0.539937919                       |                      |                                                                                    |       |          |           |
| ILMN_1771801  | SIRP         | 0.534895709                       |                      |                                                                                    |       |          |           |
| ILMN_1662626  | RTK          | 0.534640654                       |                      |                                                                                    |       |          |           |
| ILMN_1711005  | CDC25A       | 0.53359152                        |                      |                                                                                    |       |          |           |
| ILMN_1784655  | TLCD1        | 0.532587096                       |                      |                                                                                    |       |          |           |
| ILMN_2413808  | CD53         | 0.530488128                       |                      |                                                                                    |       |          |           |
| ILMN_1660654  | DCCA2        | 0.529068327                       |                      |                                                                                    |       |          |           |
| ILMN_1677997  | MAZ          | 0.526841235                       |                      |                                                                                    |       |          |           |
| ILMN_1709795  | RAC2         | 0.526317493                       |                      |                                                                                    |       |          |           |
| ILMN_1708538  | LOC642426    | 0.526196486                       |                      |                                                                                    |       |          |           |
| ILMN_1720771  | STK11        | 0.524749533                       |                      |                                                                                    |       |          |           |
| ILMN_1798061  | ZFYH2E       | 0.52311731                        |                      |                                                                                    |       |          |           |
| ILMN_2148459  | B2M          | 0.522971476                       |                      |                                                                                    |       |          |           |
| ILMN_1740903  | C7orf49      | 0.522634271                       |                      |                                                                                    |       |          |           |
| ILMN_1766916  | RPA33        | 0.521331799                       |                      |                                                                                    |       |          |           |
| ILMN_2062832  | THR1         | 0.52086732                        |                      |                                                                                    |       |          |           |
| ILMN_1750088  | WTK2         | 0.520027163                       |                      |                                                                                    |       |          |           |
| ILMN_1746683  | GOLGA6       | 0.51964193                        |                      |                                                                                    |       |          |           |
| ILMN_1891368  | BSF2640A     | 0.518246066                       |                      |                                                                                    |       |          |           |
| ILMN_1769606  | PW1L4        | 0.517111048                       |                      |                                                                                    |       |          |           |
| ILMN_1731349  | HOKA13       | 0.516937368                       |                      |                                                                                    |       |          |           |
| ILMN_2400663  | AKAP9        | 0.516517228                       |                      |                                                                                    |       |          |           |
| ILMN_1740655  | GRIN2D       | 0.515347665                       |                      |                                                                                    |       |          |           |
| ILMN_1690706  | SNRPB        | 0.514297548                       |                      |                                                                                    |       |          |           |
| ILMN_2208455  | DNHD1        | 0.513973644                       |                      |                                                                                    |       |          |           |
| ILMN_1805235  | SNRPB        | 0.513523236                       |                      |                                                                                    |       |          |           |
| ILMN_1782810  | ARPM1        | 0.511765168                       |                      |                                                                                    |       |          |           |
| ILMN_1685682  | PCNA         | 0.511204234                       |                      |                                                                                    |       |          |           |
| ILMN_2077550  | RACGAP1      | 0.510994819                       |                      |                                                                                    |       |          |           |
| ILMN_2188451  | HST1H2AH     | 0.510065216                       |                      |                                                                                    |       |          |           |
| ILMN_1731742  | TNFRSF3C     | 0.509004925                       |                      |                                                                                    |       |          |           |
| ILMN_1728832  | E1F4H        | 0.509377268                       |                      |                                                                                    |       |          |           |
| ILMN_3239965  | IDO1         | 0.507541614                       |                      |                                                                                    |       |          |           |
| ILMN_1662427  | PTPA43       | 0.507278362                       |                      |                                                                                    |       |          |           |
| ILMN_1665049  | SPG11        | 0.505735806                       |                      |                                                                                    |       |          |           |
| ILMN_1694956  | SCN5A        | 0.505649413                       |                      |                                                                                    |       |          |           |
| ILMN_1696004  | LRK1         | 0.504011077                       |                      |                                                                                    |       |          |           |
| ILMN_3240594  | RNU4ATC      | 0.503873937                       |                      |                                                                                    |       |          |           |
| ILMN_1700380  | ATP6VOA2     | 0.503509227                       |                      |                                                                                    |       |          |           |
| ILMN_1789955  | C2orf60      | 0.503054238                       |                      |                                                                                    |       |          |           |
| ILMN_1712608  | BSP1         | 0.502865678                       |                      |                                                                                    |       |          |           |

Negative correlation

| Transcripts  | Pathways     |                                   |                      |                        |       |          |           |
|--------------|--------------|-----------------------------------|----------------------|------------------------|-------|----------|-----------|
| Identifier   | Gene Symbol  | Correlation coefficient with CD19 | Annotation Cluster 1 | Enrichment Score: 1.43 | Count | P_Value  | Benjamini |
| ILMN_1808163 | C11orf24     | -0.400014                         |                      |                        | 17    | 1.90E-03 | 1.80E-01  |
| ILMN_1768856 | CHAT         | -0.400110384                      |                      |                        | 21    | 5.20E-03 | 5.70E-01  |
| ILMN_1808523 | CD19         | -0.400067072                      |                      |                        | 16    | 6.90E-03 | 4.20E-01  |
| ILMN_1772409 | FAM20A       | -0.400269582                      |                      |                        | 18    | 8.30E-03 | 1.00E-00  |
| ILMN_1726693 | LIPK         | -0.400353994                      |                      |                        | 16    | 9.60E-03 | 1.00E-00  |
| ILMN_1762952 | ARTN         | -0.400376425                      |                      |                        | 16    | 1.30E-02 | 9.40E-01  |
| ILMN_1774427 | CALCOCC1     | -0.400395592                      |                      |                        | 16    | 1.50E-02 | 1.00E-00  |
| ILMN_1812607 | NRXN1S69     | -0.400420066                      |                      |                        | 13    | 2.90E-02 | 9.30E-01  |
| ILMN_1790603 | ATPAF1       | -0.40061016                       |                      |                        | 39    | 3.70E-02 | 8.20E-01  |
| ILMN_1851972 | BM973882     | -0.400735148                      |                      |                        | 45    | 5.30E-02 | 1.00E-00  |
| ILMN_1832209 | AA906426     | -0.400781929                      |                      |                        | 20    | 5.90E-02 | 1.00E-00  |
| ILMN_1791114 | CR1          | -0.400864931                      |                      |                        | 22    | 6.00E-02 | 8.30E-01  |
| ILMN_1807935 | AW297864     | -0.400885775                      |                      |                        | 23    | 6.60E-02 | 8.40E-01  |
| ILMN_1866217 | DA162273     | -0.400924414                      |                      |                        | 19    | 7.70E-02 | 1.00E-00  |
| ILMN_1718884 | MAGF1        | -0.401120574                      |                      |                        | 22    | 7.90E-02 | 1.00E-00  |
| ILMN_1721994 | HP54         | -0.401274698                      |                      |                        | 39    | 9.50E-02 | 1.00E-00  |
| ILMN_1849859 | BU616091     | -0.401380272                      |                      |                        | 19    | 9.60E-02 | 1.00E-00  |
| ILMN_1812607 | MARK4CH      | -0.401329648                      |                      |                        | 23    | 1.20E-01 | 1.00E-00  |
| ILMN_1652164 | UNC93B1      | -0.40150875                       |                      |                        | 27    | 1.50E-01 | 1.00E-00  |
| ILMN_1691849 | LIN7C        | -0.401956556                      |                      |                        | 46    | 1.80E-01 | 9.20E-01  |
| ILMN_2184575 | CN02         | -0.402066709                      |                      |                        | 53    | 3.30E-01 | 1.00E-00  |
| ILMN_3231538 | NA           | -0.402078693                      |                      |                        |       |          |           |
| ILMN_1814793 | C4A40405     | -0.402290388                      |                      |                        |       |          |           |
| ILMN_1848474 | A1218484     | -0.402409857                      |                      |                        |       |          |           |
| ILMN_1685985 | EEF1A1       | -0.402424309                      |                      |                        |       |          |           |
| ILMN_1776685 | CD19         | -0.402614594                      |                      |                        |       |          |           |
| ILMN_1768719 | RHDH1        | -0.402672924                      |                      |                        |       |          |           |
| ILMN_1878107 | SMAD3        | -0.402731029                      |                      |                        |       |          |           |
| ILMN_1703158 | SFI1         | -0.402716638                      |                      |                        |       |          |           |
| ILMN_1754592 | EDARADD      | -0.402765471                      |                      |                        |       |          |           |
| ILMN_3254666 | ZNF737       | -0.40278136                       |                      |                        |       |          |           |
| ILMN_1649507 | FAM90A13     | -0.40288402                       |                      |                        |       |          |           |
| ILMN_2137464 | DVL3         | -0.402950311                      |                      |                        |       |          |           |
| ILMN_1654112 | PAD60A       | -0.403230385                      |                      |                        |       |          |           |
| ILMN_1715814 | LMAN1        | -0.403478126                      |                      |                        |       |          |           |
| ILMN_1758173 | TMEH9        | -0.403564978                      |                      |                        |       |          |           |
| ILMN_1657483 | SEC23B       | -0.40379332                       |                      |                        |       |          |           |
| ILMN_1759496 | RAC2         | -0.40395145                       |                      |                        |       |          |           |
| ILMN_1662347 | MANEAL       | -0.404158458                      |                      |                        |       |          |           |
| ILMN_1749641 | F80G3        | -0.404401919                      |                      |                        |       |          |           |
| ILMN_1668814 | CENPM        | -0.404500121                      |                      |                        |       |          |           |
| ILMN_1725157 | NEKG         | -0.405051017                      |                      |                        |       |          |           |
| ILMN_1747412 | LOC100137379 | -0.405037049                      |                      |                        |       |          |           |
| ILMN_1749821 | MED2B        | -0.405432328                      |                      |                        |       |          |           |
| ILMN_1520627 | INTS6        | -0.405438379                      |                      |                        |       |          |           |
| ILMN_1711765 | NA           | -0.405443898                      |                      |                        |       |          |           |
| ILMN_1655498 | FAM57B       | -0.405897785                      |                      |                        |       |          |           |
| ILMN_2398907 | RTN4S2       | -0.405957384                      |                      |                        |       |          |           |
| ILMN_2113326 | RNASE3       | -0.405967213                      |                      |                        |       |          |           |
| ILMN_1681884 | LOC100506049 | -0.405979469                      |                      |                        |       |          |           |
| ILMN_1665338 | PTPR8        | -0.405985831                      |                      |                        |       |          |           |
| ILMN_3309339 | MIR100       | -0.406011311                      | </                   |                        |       |          |           |





|              |                |             |
|--------------|----------------|-------------|
| ILMN_171462  | MNS1           | 0.431008159 |
| ILMN_1309021 | MNR12          | 0.430991173 |
| ILMN_2400940 | LMN1           | 0.429588009 |
| ILMN_1768293 | NUP155         | 0.430658083 |
| ILMN_1700939 | RLP13          | 0.430524784 |
| ILMN_1689136 | LOC644962      | 0.430472491 |
| ILMN_2190069 | DEFB10         | 0.430215916 |
| ILMN_1774735 | DDI1           | 0.429588009 |
| ILMN_1741044 | NSC            | 0.429138614 |
| ILMN_1696110 | TUBGCP3        | 0.429108896 |
| ILMN_1623632 | UGR6           | 0.429042515 |
| ILMN_1813275 | UP_SEQ_FEATURE | 0.428980584 |
| ILMN_1670746 | ROU1           | 0.428903195 |
| ILMN_1804332 | GPI137         | 0.428795066 |
| ILMN_1746435 | HST1H1E        | 0.428635775 |
| ILMN_1885891 | BM671563       | 0.428438276 |
| ILMN_1693966 | IG20I2         | 0.428373748 |
| ILMN_2272096 | LOC10129520    | 0.428232646 |
| ILMN_1695311 | HLA-DMA        | 0.428230583 |
| ILMN_1794534 | CDC81          | 0.428081229 |
| ILMN_1788108 | TXNDC5         | 0.428014073 |
| ILMN_1831041 | MKR24-1        | 0.427740054 |
| ILMN_1884640 | THEM5          | 0.426239289 |
| ILMN_1766487 | LRRK25         | 0.426242434 |
| ILMN_1710571 | PAPF5          | 0.426395341 |
| ILMN_2370882 | ACSL5          | 0.426284596 |
| ILMN_1676797 | Cbr073         | 0.426252875 |
| ILMN_1882267 | CCD106         | 0.426203769 |
| ILMN_1729475 | LOC10131551    | 0.425476218 |
| ILMN_1666633 | BCO1000        | 0.425459315 |
| ILMN_1862043 | BG188151       | 0.425258138 |
| ILMN_2290628 | L16            | 0.425137294 |
| ILMN_1697736 | EVX2C          | 0.424770044 |
| ILMN_1791282 | SELL13         | 0.424596312 |
| ILMN_2339796 | CDC16          | 0.424593842 |
| ILMN_1724230 | FRG1           | 0.424403582 |
| ILMN_1686097 | TOP2A          | 0.424343713 |
| ILMN_221246  | TFPIIIP2       | 0.424121176 |
| ILMN_1749560 | LOC10125366    | 0.424025366 |
| ILMN_1802360 | KRTAP5-2       | 0.423763128 |
| ILMN_1729058 | SCAMP1         | 0.423141884 |
| ILMN_1759075 | TNFRSF13B      | 0.42277624  |
| ILMN_1731548 | IT1            | 0.422616435 |
| ILMN_1887103 | XAR8           | 0.422590908 |
| ILMN_2181223 | MPHOSPH10      | 0.422569347 |
| ILMN_1798977 | GRP97          | 0.422474237 |
| ILMN_1719870 | FAM7D3         | 0.422423589 |
| ILMN_2291571 | GUS1           | 0.422384735 |
| ILMN_2095920 | IT1A4          | 0.421945936 |
| ILMN_1695356 | RNF166         | 0.421808771 |
| ILMN_1763060 | LTN1           | 0.421494761 |
| ILMN_1764320 | Cbr058         | 0.421330844 |
| ILMN_1787576 | HDAFX          | 0.421085118 |
| ILMN_1708283 | SNOB412        | 0.420898115 |
| ILMN_1694367 | SNOB358        | 0.420504917 |
| ILMN_1665559 | CDK2           | 0.420458794 |
| ILMN_1792518 | STX7           | 0.4203618   |
| ILMN_1803873 | KDSM8          | 0.419947086 |
| ILMN_2398939 | MSP            | 0.419890914 |
| ILMN_1759991 | NOL12          | 0.419695951 |
| ILMN_2285648 | KCNIP4         | 0.419609131 |
| ILMN_1721629 | ZNF108         | 0.419213255 |
| ILMN_1803941 | TBC1D15        | 0.419049336 |
| ILMN_2360766 | AKO57422       | 0.418547832 |
| ILMN_2324948 | LOC10013000    | 0.418535332 |
| ILMN_1660624 | LMR2           | 0.418327976 |
| ILMN_1728199 | POLE           | 0.417829312 |
| ILMN_1758233 | PSMB9          | 0.417782787 |
| ILMN_2188833 | CD69           | 0.417727537 |
| ILMN_1748283 | PRM2           | 0.417202514 |
| ILMN_1852407 | ZNF108         | 0.417126986 |
| ILMN_1860540 | AA709087       | 0.416988159 |
| ILMN_1677446 | UBE2V1         | 0.416940628 |
| ILMN_2410262 | MTRM14         | 0.416759803 |
| ILMN_1695443 | YSK4           | 0.416534872 |
| ILMN_1660594 | YAP1           | 0.416504911 |
| ILMN_2338613 | SNOB826        | 0.415597573 |
| ILMN_1804339 | CAMK1G         | 0.41582568  |
| ILMN_1728923 | F2RL2          | 0.415431461 |
| ILMN_1707858 | H2AF2          | 0.415342164 |
| ILMN_2170735 | ZNF451         | 0.415323771 |
| ILMN_1700718 | GAGE8          | 0.415052743 |
| ILMN_1659801 | ATP6V1C1       | 0.414864623 |
| ILMN_1667803 | OR56A1         | 0.414581723 |
| ILMN_2299862 | KCNH1          | 0.414248429 |
| ILMN_2305082 | NAP            | 0.414020911 |
| ILMN_2102021 | GRP19          | 0.4138424   |
| ILMN_2170157 | VCY            | 0.413769351 |
| ILMN_3251455 | RHOQ           | 0.413724277 |
| ILMN_1667771 | GRB10          | 0.413639371 |
| ILMN_2337734 | TNRC18         | 0.413572603 |
| ILMN_2093931 | SNJ2           | 0.413464971 |
| ILMN_3229033 | TDG            | 0.413359861 |
| ILMN_2408968 | UVELD          | 0.413130778 |
| ILMN_1694584 | CLTC1          | 0.412978643 |
| ILMN_2301385 | COX6A8B        | 0.412865873 |
| ILMN_1704164 | ATP13A2        | 0.412700613 |
| ILMN_2095610 | ANXA8          | 0.412623539 |
| ILMN_1708537 | RBP1           | 0.41244957  |
| ILMN_2350077 | HEBP2          | 0.411635372 |

|                                                     |                                                                          |           |          |          |
|-----------------------------------------------------|--------------------------------------------------------------------------|-----------|----------|----------|
| GOTERM_MF_FAT                                       | translational iron binding                                               | 64        | 1.70E-01 | 9.80E-01 |
| SP_PIR_KEYWORDS                                     | metal binding                                                            | 65        | 2.20E-01 | 8.40E-01 |
| GOTERM_MF_FAT                                       | metal ion binding                                                        | 83        | 6.60E-01 | 1.00E-00 |
| GOTERM_MF_FAT                                       | metal ion binding                                                        | 82        | 6.60E-01 | 1.00E-00 |
| GOTERM_MF_FAT                                       | ion binding                                                              | 84        | 6.60E-01 | 1.00E-00 |
| <b>Annotation Cluster 29 Enrichment Score: 0.74</b> |                                                                          |           |          |          |
| Count                                               | P_Value                                                                  | Benjamini |          |          |
| KEGG_PATHWAY                                        | Gamma B-mediated phagocytosis                                            | 6         | 4.90E-02 | 6.10E-01 |
| KEGG_PATHWAY                                        | ILK signaling pathway                                                    | 4         | 2.30E-01 | 9.30E-01 |
| KEGG_PATHWAY                                        | Chemokine signaling pathway                                              | 4         | 4.50E-01 | 9.50E-01 |
| <b>Annotation Cluster 30 Enrichment Score: 0.72</b> |                                                                          |           |          |          |
| Count                                               | P_Value                                                                  | Benjamini |          |          |
| INTERPRO                                            | STER1A alpha motif type                                                  | 5         | 6.80E-02 | 1.00E-00 |
| UP_SEQ_FEATURE                                      | domain SAM                                                               | 4         | 2.10E-01 | 1.00E-00 |
| INTERPRO                                            | STER1A alpha motif SAM                                                   | 4         | 2.80E-01 | 1.00E-00 |
| SMART                                               | SMART                                                                    | 4         | 3.30E-01 | 1.00E-00 |
| <b>Annotation Cluster 31 Enrichment Score: 0.71</b> |                                                                          |           |          |          |
| Count                                               | P_Value                                                                  | Benjamini |          |          |
| GOTERM_CC_FAT                                       | condensed chromosome                                                     | 7         | 4.30E-02 | 7.70E-01 |
| GOTERM_CC_FAT                                       | condensed chromosome, centromeric region                                 | 3         | 3.80E-01 | 9.50E-01 |
| GOTERM_CC_FAT                                       | chromosome, centromeric region                                           | 4         | 4.50E-01 | 9.40E-01 |
| <b>Annotation Cluster 32 Enrichment Score: 0.71</b> |                                                                          |           |          |          |
| Count                                               | P_Value                                                                  | Benjamini |          |          |
| GOTERM_BP_FAT                                       | cell death                                                               | 22        | 5.70E-02 | 8.60E-01 |
| GOTERM_BP_FAT                                       | death                                                                    | 22        | 5.90E-02 | 8.60E-01 |
| GOTERM_BP_FAT                                       | apoptosis                                                                | 17        | 1.60E-01 | 9.40E-01 |
| GOTERM_BP_FAT                                       | positive regulation of apoptosis                                         | 13        | 1.70E-01 | 9.40E-01 |
| GOTERM_BP_FAT                                       | positive regulation of programmed cell death                             | 13        | 1.70E-01 | 9.40E-01 |
| GOTERM_BP_FAT                                       | positive regulation of cell death                                        | 13        | 1.70E-01 | 9.40E-01 |
| GOTERM_BP_FAT                                       | programmed cell death                                                    | 17        | 1.70E-01 | 9.40E-01 |
| GOTERM_BP_FAT                                       | regulation of programmed cell death                                      | 21        | 2.10E-01 | 9.50E-01 |
| GOTERM_BP_FAT                                       | regulation of cell death                                                 | 21        | 2.10E-01 | 9.50E-01 |
| GOTERM_BP_FAT                                       | regulation of apoptosis                                                  | 20        | 2.70E-01 | 9.50E-01 |
| SP_PIR_KEYWORDS                                     | Apoptosis                                                                | 10        | 3.30E-01 | 9.00E-01 |
| GOTERM_BP_FAT                                       | induction of apoptosis                                                   | 7         | 6.30E-01 | 1.00E-00 |
| GOTERM_BP_FAT                                       | induction of programmed cell death                                       | 7         | 6.30E-01 | 1.00E-00 |
| <b>Annotation Cluster 33 Enrichment Score: 0.7</b>  |                                                                          |           |          |          |
| Count                                               | P_Value                                                                  | Benjamini |          |          |
| GOTERM_BP_FAT                                       | membrane organization                                                    | 13        | 1.60E-02 | 9.50E-01 |
| GOTERM_BP_FAT                                       | membrane invagination                                                    | 8         | 1.60E-01 | 9.40E-01 |
| GOTERM_BP_FAT                                       | endocytosis                                                              | 8         | 1.60E-01 | 9.40E-01 |
| GOTERM_BP_FAT                                       | vesicle-mediated transport                                               | 15        | 2.80E-01 | 9.70E-01 |
| SP_PIR_KEYWORDS                                     | Endocytosis                                                              | 3         | 5.60E-01 | 9.70E-01 |
| <b>Annotation Cluster 34 Enrichment Score: 0.66</b> |                                                                          |           |          |          |
| Count                                               | P_Value                                                                  | Benjamini |          |          |
| GOTERM_BP_FAT                                       | stem cell development                                                    | 5         | 1.50E-01 | 9.40E-01 |
| GOTERM_BP_FAT                                       | reproductive cellular process                                            | 6         | 2.30E-01 | 9.60E-01 |
| GOTERM_BP_FAT                                       | seamless differentiation                                                 | 3         | 3.20E-01 | 9.70E-01 |
| <b>Annotation Cluster 35 Enrichment Score: 0.64</b> |                                                                          |           |          |          |
| Count                                               | P_Value                                                                  | Benjamini |          |          |
| GOTERM_BP_FAT                                       | response to ionizing radiation                                           | 5         | 1.30E-02 | 9.50E-01 |
| GOTERM_BP_FAT                                       | response to radiation                                                    | 7         | 2.20E-01 | 9.50E-01 |
| GOTERM_BP_FAT                                       | response to light stimulus                                               | 5         | 3.00E-01 | 9.70E-01 |
| GOTERM_BP_FAT                                       | response to UV                                                           | 3         | 3.30E-01 | 9.70E-01 |
| GOTERM_BP_FAT                                       | response to oxidative stress                                             | 5         | 4.20E-01 | 9.90E-01 |
| GOTERM_BP_FAT                                       | response to abiotic stimulus                                             | 4         | 6.00E-01 | 1.00E-00 |
| <b>Annotation Cluster 36 Enrichment Score: 0.63</b> |                                                                          |           |          |          |
| Count                                               | P_Value                                                                  | Benjamini |          |          |
| GOTERM_BP_FAT                                       | regulation of behavior                                                   | 4         | 6.50E-02 | 8.70E-01 |
| GOTERM_BP_FAT                                       | regulation of chemotaxis                                                 | 3         | 1.30E-01 | 9.20E-01 |
| GOTERM_BP_FAT                                       | positive regulation of behavior                                          | 3         | 1.50E-01 | 9.40E-01 |
| GOTERM_BP_FAT                                       | positive regulation of response to external stimulus                     | 3         | 1.70E-01 | 9.40E-01 |
| GOTERM_BP_FAT                                       | regulation of locomotion                                                 | 5         | 5.50E-01 | 9.90E-01 |
| GOTERM_BP_FAT                                       | regulation of response to external stimulus                              | 4         | 6.30E-01 | 1.00E-00 |
| <b>Annotation Cluster 37 Enrichment Score: 0.61</b> |                                                                          |           |          |          |
| Count                                               | P_Value                                                                  | Benjamini |          |          |
| GOTERM_BP_FAT                                       | regulation of cellular response to stress                                | 7         | 1.80E-02 | 7.30E-01 |
| GOTERM_BP_FAT                                       | regulation of stress-activated protein kinase signaling pathway          | 5         | 5.10E-02 | 8.50E-01 |
| GOTERM_BP_FAT                                       | regulation of protein kinase cascade                                     | 10        | 6.60E-02 | 8.70E-01 |
| GOTERM_BP_FAT                                       | positive regulation of stress-activated protein kinase signaling pathway | 3         | 6.60E-02 | 8.60E-01 |
| GOTERM_BP_FAT                                       | pathway                                                                  | 7         | 2.00E-01 | 9.20E-01 |
| GOTERM_BP_FAT                                       | positive regulation of protein kinase cascade                            | 12        | 1.30E-01 | 9.20E-01 |
| GOTERM_BP_FAT                                       | regulation of protein kinase cascade                                     | 4         | 1.40E-01 | 9.30E-01 |
| GOTERM_BP_FAT                                       | regulation of MAPK cascade                                               | 5         | 1.80E-01 | 9.40E-01 |
| GOTERM_BP_FAT                                       | positive regulation of signal transduction                               | 9         | 2.50E-01 | 9.60E-01 |
| GOTERM_BP_FAT                                       | positive regulation of protein kinase activity                           | 14        | 2.50E-01 | 9.60E-01 |
| GOTERM_BP_FAT                                       | positive regulation of molecular function                                | 15        | 3.00E-01 | 9.70E-01 |
| GOTERM_BP_FAT                                       | MAPKXX cascade                                                           | 6         | 3.10E-01 | 9.70E-01 |
| GOTERM_BP_FAT                                       | regulation of MAP kinase activity                                        | 5         | 3.20E-01 | 9.70E-01 |
| GOTERM_BP_FAT                                       | positive regulation of MAP kinase activity                               | 4         | 3.40E-01 | 9.80E-01 |
| GOTERM_BP_FAT                                       | regulation of phosphorylation                                            | 12        | 3.90E-01 | 9.80E-01 |
| GOTERM_BP_FAT                                       | positive regulation of cell communication                                | 9         | 3.50E-01 | 9.80E-01 |
| GOTERM_BP_FAT                                       | regulation of fibroblast metabolic process                               | 12        | 3.90E-01 | 9.80E-01 |
| GOTERM_BP_FAT                                       | regulation of aldehyde metabolic process                                 | 12        | 3.90E-01 | 9.80E-01 |
| GOTERM_BP_FAT                                       | regulation of protein kinase activity                                    | 5         | 4.05E-01 | 9.90E-01 |
| GOTERM_BP_FAT                                       | positive regulation of protein kinase activity                           | 6         | 4.70E-01 | 9.90E-01 |
| GOTERM_BP_FAT                                       | activation of MAPK activity                                              | 3         | 5.00E-01 | 9.90E-01 |
| GOTERM_BP_FAT                                       | positive regulation of kinase activity                                   | 6         | 5.00E-01 | 9.90E-01 |
| GOTERM_BP_FAT                                       | positive regulation of transferase activity                              | 6         | 5.30E-01 | 9.90E-01 |
| GOTERM_BP_FAT                                       | regulation of protein kinase activity                                    | 7         | 5.80E-01 | 1.00E-00 |
| GOTERM_BP_FAT                                       | regulation of kinase activity                                            | 8         | 5.80E-01 | 1.00E-00 |
| GOTERM_BP_FAT                                       | regulation of transferase activity                                       | 8         | 6.30E-01 | 1.00E-00 |
| <b>Annotation Cluster 38 Enrichment Score: 0.6</b>  |                                                                          |           |          |          |
| Count                                               | P_Value                                                                  | Benjamini |          |          |
| GOTERM_BP_FAT                                       | cell cycle checkpoint                                                    | 5         | 1.10E-01 | 9.00E-01 |
| GOTERM_BP_FAT                                       | DNA damage checkpoint                                                    | 3         | 2.50E-01 | 9.60E-01 |
| GOTERM_BP_FAT                                       | DNA replication checkpoint                                               | 3         | 2.80E-01 | 9.70E-01 |
| GOTERM_BP_FAT                                       | DNA damage response, signal transduction                                 | 3         | 4.80E-01 | 9.90E-01 |
| <b>Annotation Cluster 39 Enrichment Score: 0.6</b>  |                                                                          |           |          |          |
| Count                                               | P_Value                                                                  | Benjamini |          |          |
| UP_SEQ_FEATURE                                      | repeat:LR 1                                                              | 11        | 9.70E-02 | 1.00E-00 |
| UP_SEQ_FEATURE                                      | repeat:LR 2                                                              | 11        | 1.00E-01 | 1.00E-00 |
| SP_PIR_KEYWORDS                                     | Repeat:R1 repeat                                                         | 11        | 1.00E-01 | 1.00E-00 |
| UP_SEQ_FEATURE                                      | repeat:LR 6                                                              | 8         | 1.20E-01 | 1.00E-00 |
| UP_SEQ_FEATURE                                      | repeat:LR 7                                                              | 7         | 1.40E-01 | 1.00E-00 |
| UP_SEQ_FEATURE                                      | repeat:LR 8                                                              | 6         | 1.70E-01 | 1.00E-00 |
| UP_SEQ_FEATURE                                      | repeat:LR 9                                                              | 6         | 1.70E-01 | 1.00E-00 |
| UP_SEQ_FEATURE                                      | repeat:LR 10                                                             | 6         | 2.20E-01 | 1.00E-00 |
| UP_SEQ_FEATURE                                      | repeat:LR 4                                                              | 8         | 2.30E-01 | 1.00E-00 |
| UP_SEQ_FEATURE                                      | repeat:LR 3                                                              | 9         | 2.30E-01 | 1.00E-00 |
| UP_SEQ_FEATURE                                      | repeat:LR 15                                                             | 3         | 2.60E-01 | 1.00E-00 |

|              |              |              |
|--------------|--------------|--------------|
| ILMN_1713533 | TKTL2        | -0.456411638 |
| ILMN_1722673 | PCNB4        | -0.456518866 |
| ILMN_2397846 | SHCB         | -0.456525276 |
| ILMN_1694210 | HMGCS1       | -0.456808213 |
| ILMN_1797201 | KRTAP10-2    | -0.456892062 |
| ILMN_1803033 | MGST1        | -0.456907348 |
| ILMN_1882015 | BG951912     | -0.457277256 |
| ILMN_1732426 | CHH1         | -0.457273916 |
| ILMN_1694210 | HMGCS1       | -0.457301515 |
| ILMN_2299221 | DMRT1        | -0.458401704 |
| ILMN_3228746 | GDPD5        | -0.458663417 |
| ILMN_3247514 | Chro772      | -0.458737446 |
| ILMN_1811068 | CABYR        | -0.458873874 |
| ILMN_249067  | KLC1         | -0.459023749 |
| ILMN_1694952 | SSX4B        | -0.459820308 |
| ILMN_1886510 | VPF53        | -0.459946356 |
| ILMN_1672074 | SHS4B        | -0.459984469 |
| ILMN_1714222 | PLEKHN1      | -0.460330044 |
| ILMN_2045220 | ORAM17       | -0.462080688 |
| ILMN_1652819 | OPA3         | -0.461070186 |
| ILMN_1784477 | PLEKHG5      | -0.461842968 |
| ILMN_1797169 | ORAM47       | -0.462159392 |
| ILMN_1749381 | ACRNOA0164   | -0.463432659 |
| ILMN_1787015 | RGS18L1      | -0.463836142 |
| ILMN_1661653 | DET1         | -0.463887314 |
| ILMN_1715669 | TPST1        | -0.464112925 |
| ILMN_1766230 | IL3          | -0.464214463 |
| ILMN_1724669 | RUNX1T1      | -0.464272871 |
| ILMN_1765216 | RNF67        | -0.464370886 |
| ILMN_1691349 | LOC100133050 | -0.465743359 |
| ILMN_3204668 | BM921547     | -0.466246826 |
| ILMN_1724427 | ORM2         | -0.466336793 |
| ILMN_1667416 | TRIM74       | -0.466688975 |
| ILMN_1667416 | TRIM74       | -0.466767484 |
| ILMN_1803850 | TPSAP15      | -0.466868713 |
| ILMN_1778188 | TPP3         | -0.467235425 |
| ILMN_1669669 | KCMF1        | -0.468208107 |
| ILMN_1791297 | LOC6494905   | -0.468284027 |
| ILMN_1765216 | RNF67        | -0.468298964 |
| ILMN_1660963 | CCN          | -0.469449678 |
| ILMN_1728684 | PELP1        | -0.469451343 |
| ILMN_1669676 | SERP2        | -0.469531274 |
| ILMN_1748859 | TCF61        | -0.469596959 |
| ILMN_1668454 | RGS18        | -0.470380115 |
| ILMN_1722070 | AP0C3        | -0.470889218 |

|              |           |             |                 |                                                            |    |          |          |
|--------------|-----------|-------------|-----------------|------------------------------------------------------------|----|----------|----------|
| ILMN_2367070 | ACOT9     | 0.411621491 | UP_SEQ_FEATURE  | repeat:LRR 9                                               | 5  | 2.70E-01 | 1.00E+00 |
| ILMN_1739599 | ADPKC     | 0.411551885 | UP_SEQ_FEATURE  | repeat:LRR 11                                              | 4  | 3.20E-01 | 1.00E+00 |
| ILMN_1702585 | SET       | 0.410437891 | UP_SEQ_FEATURE  | repeat:LRR 10                                              | 3  | 3.00E-01 | 1.00E+00 |
| ILMN_1705025 | UBE2L6    | 0.41043696  | UP_SEQ_FEATURE  | repeat:LRR 10                                              | 4  | 4.00E-01 | 1.00E+00 |
| ILMN_1666544 | ARRDC4    | 0.410299623 | INTERPRO        | leucine-rich repeat                                        | 6  | 4.20E-01 | 1.00E+00 |
| ILMN_1703072 | CREB3     | 0.410127395 | UP_SEQ_FEATURE  | repeat:LRR 12                                              | 3  | 4.40E-01 | 1.00E+00 |
| ILMN_2328874 | GHI1      | 0.40991692  | UP_SEQ_FEATURE  | repeat:LRR 12                                              | 3  | 5.40E-01 | 1.00E+00 |
| ILMN_2083066 | IGLBP3    | 0.409854039 | INTERPRO        | leucine-rich repeat, typical subtype                       | 3  | 7.40E-01 | 1.00E+00 |
| ILMN_1731318 | TEK9      | 0.409851572 | SMART           | SH_17P                                                     | 7  | 8.00E-01 | 1.00E+00 |
| ILMN_1731294 | GRP179    | 0.409845377 |                 |                                                            |    |          |          |
| ILMN_2353161 | MSLN      | 0.409743974 | GOTERM_BP_FAT   | macromolecule catabolic process                            | 23 | 7.10E-02 | 8.70E-01 |
| ILMN_1692276 | GGPS1     | 0.409741762 | GOTERM_BP_FAT   | cellular macromolecule catabolic process                   | 21 | 9.90E-02 | 8.90E-01 |
| ILMN_1725338 | LOC421    | 0.409383367 | GOTERM_BP_FAT   | modification-dependent macromolecule catabolic process     | 15 | 2.70E-01 | 9.70E-01 |
| ILMN_1753716 | EF2B1     | 0.409269843 | GOTERM_BP_FAT   | ubiquitin-dependent protein catabolic process              | 15 | 2.70E-01 | 9.70E-01 |
| ILMN_1692703 | CYLC1     | 0.409159735 | GOTERM_BP_FAT   | protein catabolic process                                  | 16 | 2.70E-01 | 9.70E-01 |
| ILMN_1697315 | GNAT1     | 0.409157737 | GOTERM_BP_FAT   | proteolysis                                                | 25 | 3.00E-01 | 9.70E-01 |
| ILMN_2124585 | GREM1     | 0.409134098 | GOTERM_BP_FAT   | proteolysis involved in cellular protein catabolic process | 15 | 3.30E-01 | 9.70E-01 |
| ILMN_1795662 | C16orf82  | 0.409120346 | GOTERM_BP_FAT   | cellular protein catabolic process                         | 15 | 3.30E-01 | 9.70E-01 |
| ILMN_1865559 | NA        | 0.40911403  | GOTERM_BP_FAT   | ubiquitin-dependent protein catabolic process              | 7  | 3.60E-01 | 9.80E-01 |
| ILMN_1769245 | GLP1R1    | 0.408664533 | SP_PIR_KEYWORDS | tbl1 conjugation pathway                                   | 10 | 6.70E-01 | 9.80E-01 |
| ILMN_1745787 | POLL      | 0.408625575 |                 |                                                            |    |          |          |
| ILMN_1731891 | UBN8N     | 0.408286108 | GOTERM_MF_FAT   | protein dimerization activity                              | 16 | 1.30E-01 | 9.60E-01 |
| ILMN_1792384 | HABP4     | 0.407685749 | GOTERM_MF_FAT   | protein homodimerization activity                          | 7  | 2.50E-01 | 9.80E-01 |
| ILMN_1739127 | C18orf12  | 0.407682369 | GOTERM_MF_FAT   | protein homodimerization activity                          | 8  | 5.20E-01 | 1.00E+00 |
| ILMN_2198376 | PSMA4     | 0.407664738 |                 |                                                            |    |          |          |
| ILMN_1785635 | BRD3      | 0.407648554 | GOTERM_CC_FAT   | vacuole                                                    | 8  | 2.30E-01 | 9.40E-01 |
| ILMN_1710989 | LOC653061 | 0.407498806 | GOTERM_CC_FAT   | lysine vacuole                                             | 7  | 2.40E-01 | 9.40E-01 |
| ILMN_1716276 | CLC4      | 0.40712232  | GOTERM_CC_FAT   | vacuole                                                    | 7  | 2.40E-01 | 9.40E-01 |
| ILMN_1732909 | ALGO      | 0.407093866 | SP_PIR_KEYWORDS | ALGO                                                       | 5  | 3.30E-01 | 9.80E-01 |
| ILMN_1781285 | DUSP1     | 0.406902549 |                 |                                                            |    |          |          |
| ILMN_1656073 | MYL12A    | 0.406726282 | GOTERM_CC_FAT   | nuclear envelope                                           | 11 | 7.70E-03 | 9.20E-01 |
| ILMN_1307911 | AKR1C1L1  | 0.406725627 | GOTERM_CC_FAT   | endomembrane system                                        | 24 | 3.70E-02 | 8.30E-01 |
| ILMN_1777637 | SFN1L     | 0.406596464 | GOTERM_CC_FAT   | cytosolic envelope                                         | 18 | 1.10E-01 | 8.70E-01 |
| ILMN_1842024 | AP08      | 0.406571539 | GOTERM_CC_FAT   | cytoskeleton                                               | 18 | 1.10E-01 | 8.50E-01 |
| ILMN_1786759 | C11orf10  | 0.40631992  | GOTERM_CC_FAT   | mitochondrial outer membrane                               | 4  | 2.60E-01 | 9.40E-01 |
| ILMN_2391333 | CYP20A1   | 0.406255936 | GOTERM_CC_FAT   | organelle outer membrane                                   | 4  | 3.40E-01 | 9.50E-01 |
| ILMN_1755383 | LRRC1     | 0.406147992 | GOTERM_CC_FAT   | outer membrane                                             | 4  | 3.60E-01 | 9.50E-01 |
| ILMN_1781886 | LOC441179 | 0.406050934 | GOTERM_BP_FAT   | mitochondrial transport                                    | 3  | 4.10E-01 | 9.80E-01 |
| ILMN_1754474 | CTNS      | 0.405780245 | GOTERM_CC_FAT   | mitochondrial membrane                                     | 7  | 8.00E-01 | 9.90E-01 |
| ILMN_1818247 | BGT2200   | 0.405548267 | GOTERM_CC_FAT   | mitochondrion                                              | 19 | 8.20E-01 | 1.00E+00 |
| ILMN_1672876 | MF12      | 0.405536726 | GOTERM_CC_FAT   | mitochondrial envelope                                     | 7  | 8.40E-01 | 1.00E+00 |
| ILMN_2223887 | OTOR      | 0.405483694 | GOTERM_CC_FAT   | organelle inner membrane                                   | 7  | 8.90E-01 | 1.00E+00 |
| ILMN_1804877 | CASP9     | 0.405220992 | GOTERM_CC_FAT   | mitochondrial inner membrane                               | 4  | 9.40E-01 | 1.00E+00 |
| ILMN_1751744 | ANKE1     | 0.405142271 | GOTERM_CC_FAT   | mitochondrial part                                         | 8  | 9.50E-01 | 1.00E+00 |
| ILMN_1736013 | CIB3      | 0.405045801 |                 |                                                            |    |          |          |
| ILMN_1797172 | ERCC1     | 0.40492722  |                 |                                                            |    |          |          |
| ILMN_1825159 | BCO40587  | 0.404779777 | GOTERM_BP_FAT   | development of primary male sexual characteristics         | 4  | 1.40E-01 | 9.30E-01 |
| ILMN_2320513 | APBB8     | 0.404759708 | GOTERM_BP_FAT   | reproductive development process                           | 9  | 1.80E-01 | 9.40E-01 |
| ILMN_1654626 | RHIC1     | 0.404310246 | GOTERM_BP_FAT   | male sex differentiation                                   | 3  | 2.00E-01 | 9.50E-01 |
| ILMN_1666173 | TCF20     | 0.404306377 | GOTERM_BP_FAT   | ovarian follicle development                               | 5  | 2.50E-01 | 9.60E-01 |
| ILMN_1719103 | UBE2CBP   | 0.404270406 | GOTERM_BP_FAT   | development of primary sexual characteristics              | 5  | 2.50E-01 | 9.60E-01 |
| ILMN_3247462 | GLRX3     | 0.404262335 | GOTERM_BP_FAT   | male gonad development                                     | 3  | 2.80E-01 | 9.70E-01 |
| ILMN_1872838 | KRC       | 0.404023974 | GOTERM_BP_FAT   | ovulation cycle process                                    | 3  | 3.60E-01 | 9.80E-01 |
| ILMN_1771870 | FAM98C    | 0.403926393 | GOTERM_BP_FAT   | sex differentiation                                        | 5  | 3.60E-01 | 9.80E-01 |
| ILMN_2371169 | ZYX       | 0.403829212 | GOTERM_BP_FAT   | female gonad development                                   | 3  | 3.70E-01 | 9.80E-01 |
| ILMN_1794677 | TMC6      | 0.403568806 | GOTERM_BP_FAT   | ovulation cycle                                            | 3  | 3.90E-01 | 9.80E-01 |
| ILMN_3221888 | NAP1L6    | 0.403346727 | GOTERM_BP_FAT   | ovulation development                                      | 4  | 3.90E-01 | 9.80E-01 |
| ILMN_1658034 | AGAP4     | 0.403320514 | GOTERM_BP_FAT   | development of primary female sexual characteristics       | 3  | 4.10E-01 | 9.80E-01 |
| ILMN_1656832 | DNAH2     | 0.403249612 | GOTERM_BP_FAT   | female sex differentiation                                 | 3  | 4.10E-01 | 9.80E-01 |
| ILMN_2337789 | MARCK2    | 0.402882346 | GOTERM_BP_FAT   | cytoskeletal process                                       | 4  | 4.80E-01 | 9.90E-01 |
| ILMN_2258816 | SAMD3     | 0.402753993 |                 |                                                            |    |          |          |
| ILMN_1809434 | XBP1      | 0.402522842 |                 |                                                            |    |          |          |
| ILMN_1682894 | TMTM191C  | 0.402252341 | GOTERM_BP_FAT   | positive regulation of multicellular organism growth       | 3  | 9.00E-02 | 8.90E-01 |
| ILMN_2346328 | PRF1A2    | 0.40219246  | GOTERM_BP_FAT   | positive regulation of multicellular organismal process    | 8  | 2.20E-01 | 9.50E-01 |
| ILMN_1798819 | DTN8      | 0.402090183 | GOTERM_BP_FAT   | regulation of multicellular organism growth                | 3  | 3.50E-01 | 9.80E-01 |
| ILMN_1758731 | CYP2J2    | 0.401988843 | GOTERM_BP_FAT   | positive regulation of growth                              | 3  | 4.80E-01 | 9.90E-01 |
| ILMN_1713290 | GLT1B1    | 0.401922033 | GOTERM_BP_FAT   | regulation of growth                                       | 6  | 8.20E-01 | 1.00E+00 |
| ILMN_1792489 | ARPC2     | 0.401765464 |                 |                                                            |    |          |          |
| ILMN_1732108 | UTS2      | 0.401759314 | GOTERM_BP_FAT   | intracellular transport                                    | 19 | 1.20E-01 | 9.10E-01 |
| ILMN_1699170 | C5orf45   | 0.401731224 | GOTERM_BP_FAT   | cytoscytoplasmic transport                                 | 6  | 2.10E-01 | 9.50E-01 |
| ILMN_1661516 | POLR2J2   | 0.401728439 | GOTERM_BP_FAT   | nuclear transport                                          | 6  | 2.10E-01 | 9.50E-01 |
| ILMN_1744316 | TATD3     | 0.401568886 | GOTERM_BP_FAT   | nuclear import into nucleus                                | 4  | 2.50E-01 | 9.60E-01 |
| ILMN_1795852 | CNVE1     | 0.401484807 | GOTERM_BP_FAT   | nuclear import                                             | 4  | 2.80E-01 | 9.60E-01 |
| ILMN_1307505 | SCC2A24   | 0.401360557 | GOTERM_BP_FAT   | protein import                                             | 5  | 2.70E-01 | 9.70E-01 |
| ILMN_1708427 | KPNA3     | 0.401324064 | GOTERM_BP_FAT   | nuclear transport                                          | 19 | 2.80E-01 | 9.70E-01 |
| ILMN_2249720 | LAT2      | 0.401288081 | GOTERM_CC_FAT   | spore complex                                              | 4  | 2.90E-01 | 9.50E-01 |
| ILMN_2116714 | SCBP1A    | 0.401101157 | GOTERM_BP_FAT   | establishment of protein localization                      | 19 | 2.90E-01 | 9.70E-01 |
| ILMN_2112499 | DNK2      | 0.400838952 | GOTERM_BP_FAT   | protein localization in nucleus                            | 4  | 3.80E-01 | 9.70E-01 |
| ILMN_1800530 | AGAP1     | 0.400828558 | GOTERM_BP_FAT   | cellular protein localization                              | 11 | 3.20E-01 | 9.70E-01 |
| ILMN_1848913 | AF33971   | 0.400713874 | GOTERM_BP_FAT   | cellular macromolecule localization                        | 11 | 3.20E-01 | 9.70E-01 |
| ILMN_2387784 | DEAF1     | 0.400383077 | GOTERM_BP_FAT   | nuclear localization in organelle                          | 5  | 3.40E-01 | 9.80E-01 |
| ILMN_1700276 | JKAMP     | 0.40033307  | GOTERM_BP_FAT   | intracellular protein transport                            | 10 | 3.40E-01 | 9.80E-01 |
| ILMN_1880867 | C10orf90  | 0.400251815 | GOTERM_BP_FAT   | nuclear localization                                       | 20 | 4.20E-01 | 9.80E-01 |
| ILMN_1732176 | UMSF1     | 0.400195786 | GOTERM_BP_FAT   | protein targeting                                          | 6  | 4.40E-01 | 9.80E-01 |
|              |           |             | GOTERM_CC_FAT   | nuclear pore                                               | 3  | 4.70E-01 | 9.60E-01 |
|              |           |             | GOTERM_MF_FAT   | protein transporter activity                               | 3  | 5.30E-01 | 1.00E+00 |
|              |           |             | SP_PIR_KEYWORDS | protein transport                                          | 9  | 7.40E-01 | 9.90E-01 |

Annotation Cluster 40 Enrichment Score: 0.6

Annotation Cluster 41 Enrichment Score: 0.59

Annotation Cluster 42 Enrichment Score: 0.59

Annotation Cluster 43 Enrichment Score: 0.54

Annotation Cluster 44 Enrichment Score: 0.54

Annotation Cluster 45 Enrichment Score: 0.51

Annotation Cluster 46 Enrichment Score: 0.5

Annotation Cluster 47 Enrichment Score: 0.5

Annotation Cluster 48 Enrichment Score: 0.49

Annotation Cluster 49 Enrichment Score: 0.48

|              |              |             |  |  |  |  |  |
|--------------|--------------|-------------|--|--|--|--|--|
| ILMN_3239440 | GAGE12       | 0.498620978 |  |  |  |  |  |
| ILMN_1705151 | SF3A3        | 0.49905569  |  |  |  |  |  |
| ILMN_1670997 | TRK1         | 0.499097962 |  |  |  |  |  |
| ILMN_320552  | HA           | 0.500834021 |  |  |  |  |  |
| ILMN_1709173 | HMMB1        | 0.501234397 |  |  |  |  |  |
| ILMN_1810321 | LELP1        | 0.50174155  |  |  |  |  |  |
| ILMN_167486  | ORZAG2       | 0.502128613 |  |  |  |  |  |
| ILMN_1865716 | LOC729451    | 0.502154851 |  |  |  |  |  |
| ILMN_1681316 | CDC623       | 0.502449563 |  |  |  |  |  |
| ILMN_1658710 | FAM19A4      | 0.503125341 |  |  |  |  |  |
| ILMN_1890734 | LOC728800    | 0.503446465 |  |  |  |  |  |
| ILMN_2120210 | RCAN2        | 0.503736306 |  |  |  |  |  |
| ILMN_2342651 | OR11H12      | 0.503778823 |  |  |  |  |  |
| ILMN_212620  | IWAL1        | 0.50438704  |  |  |  |  |  |
| ILMN_234350  | BTBD3        | 0.50526904  |  |  |  |  |  |
| ILMN_1812461 | WISF2        | 0.505656004 |  |  |  |  |  |
| ILMN_1703984 | TIGD6        | 0.507203973 |  |  |  |  |  |
| ILMN_1917221 | C11orf95     | 0.507431219 |  |  |  |  |  |
| ILMN_2133000 | SORBS7       | 0.508590702 |  |  |  |  |  |
| ILMN_1676595 | O2B514       | 0.509240129 |  |  |  |  |  |
| ILMN_1706077 | DFB125       | 0.510224806 |  |  |  |  |  |
| ILMN_1709256 | PLEC         | 0.510517158 |  |  |  |  |  |
| ILMN_1662897 | ERCC4        | 0.510839735 |  |  |  |  |  |
| ILMN_1723520 | AKAP1        | 0.510964944 |  |  |  |  |  |
| ILMN_3238670 | SNORA47      | 0.514421232 |  |  |  |  |  |
| ILMN_1724699 | ACAD8        | 0.515617146 |  |  |  |  |  |
| ILMN_1810834 | MHS5         | 0.515937514 |  |  |  |  |  |
| ILMN_2145423 | DETI1        | 0.51647993  |  |  |  |  |  |
| ILMN_2310770 | HR23H14      | 0.516920004 |  |  |  |  |  |
| ILMN_1799717 | ZNF398       | 0.519114585 |  |  |  |  |  |
| ILMN_1698484 | RHOV         | 0.51954689  |  |  |  |  |  |
| ILMN_1720469 | BMS1P4       | 0.520098002 |  |  |  |  |  |
| ILMN_1881717 | ODC1         | 0.521206241 |  |  |  |  |  |
| ILMN_1721436 | AKAP1        | 0.52124306  |  |  |  |  |  |
| ILMN_1878029 | AKO1020      | 0.524101498 |  |  |  |  |  |
| ILMN_1656553 | LOC653160    | 0.524826462 |  |  |  |  |  |
| ILMN_2410428 | LOC728407    | 0.526161999 |  |  |  |  |  |
| ILMN_2225151 | DNM6         | 0.526251713 |  |  |  |  |  |
| ILMN_1848617 | RNKL3        | 0.529239283 |  |  |  |  |  |
| ILMN_1737517 | RPL29        | 0.529959857 |  |  |  |  |  |
| ILMN_3268675 | LOC100130880 | 0.530107625 |  |  |  |  |  |
| ILMN_1761260 | CBLL1        | 0.530463957 |  |  |  |  |  |
| ILMN_1855673 | A0027195     | 0.531761296 |  |  |  |  |  |
| ILMN_1656955 | PCN9         | 0.531823119 |  |  |  |  |  |
| ILMN_1912611 | FLJ41130     | 0.531824292 |  |  |  |  |  |
| ILMN_3189252 | PLXNA4       | 0.534148487 |  |  |  |  |  |
| ILMN_1679782 | BLOC1S2      | 0.537333163 |  |  |  |  |  |
| ILMN_3239748 | RIR3         | 0.537666675 |  |  |  |  |  |
| ILMN_1700611 | OR4K1        | 0.537848669 |  |  |  |  |  |
| ILMN_1909183 | CR740230     | 0.539205077 |  |  |  |  |  |
| ILMN_1892243 | AA720941     | 0.540135289 |  |  |  |  |  |
| ILMN_1744118 | ASTN2        | 0.54130381  |  |  |  |  |  |
| ILMN_1825623 | CHRNA9       | 0.542777646 |  |  |  |  |  |
| ILMN_1738223 | Geov708      | 0.544470215 |  |  |  |  |  |
| ILMN_1740217 | HAC1         | 0.546408172 |  |  |  |  |  |
| ILMN_1890521 | BF109917     | 0.548907753 |  |  |  |  |  |
| ILMN_2347334 | C20orf71     | 0.551456754 |  |  |  |  |  |
| ILMN_3239775 | ODZ4         | 0.553806604 |  |  |  |  |  |

|                              |                                                                           |              |                |                  |
|------------------------------|---------------------------------------------------------------------------|--------------|----------------|------------------|
| GOTERM_BP_FAT                | <a href="#">antigen processing and presentation</a>                       | 4            | 2.40E-01       | 9.60E-01         |
| INTERPRO                     | <a href="#">immunoglobulin/heparin hyaluronate complex conserved site</a> | 4            | 2.50E-01       | 1.00E+00         |
| GOTERM_CC_FAT                | <a href="#">MHC protein complex</a>                                       | 3            | 3.10E-01       | 9.50E-01         |
| KEGG_PATHWAY                 | <a href="#">Antigen processing and presentation</a>                       | 3            | 5.30E-01       | 9.60E-01         |
| INTERPRO                     | <a href="#">immunoglobulin-like fold</a>                                  | 8            | 9.30E-01       | 1.00E+00         |
| INTERPRO                     | <a href="#">immunoglobulin-like</a>                                       | 7            | 9.40E-01       | 1.00E+00         |
| <b>Annotation Cluster 50</b> | <b>Enrichment Score: 0.48</b>                                             | <b>Count</b> | <b>P_Value</b> | <b>Benjamini</b> |
| SP_PIR_KEYWORDS              | <a href="#">nuclease</a>                                                  | 5            | 1.50E-01       | 7.80E-01         |
| GOTERM_MF_FAT                | <a href="#">nuclease activity</a>                                         | 5            | 4.00E-01       | 9.90E-01         |
| GOTERM_MF_FAT                | <a href="#">endonuclease activity</a>                                     | 3            | 6.00E-01       | 1.00E+00         |
| <b>Annotation Cluster 51</b> | <b>Enrichment Score: 0.47</b>                                             | <b>Count</b> | <b>P_Value</b> | <b>Benjamini</b> |
| SP_PIR_KEYWORDS              | <a href="#">rna-binding</a>                                               | 16           | 1.10E-01       | 7.10E-01         |
| GOTERM_MF_FAT                | <a href="#">RNA binding</a>                                               | 17           | 3.80E-01       | 9.90E-01         |
| UP_SEQ_FEATURE               | <a href="#">domain-RRM</a>                                                | 4            | 4.10E-01       | 1.00E+00         |
| INTERPRO                     | <a href="#">RNA recognition motif_RNP_1</a>                               | 6            | 4.10E-01       | 1.00E+00         |
| INTERPRO                     | <a href="#">Nucleotide-binding_alpha-beta_fold</a>                        | 6            | 4.20E-01       | 1.00E+00         |
| SMART                        | <a href="#">RRM</a>                                                       | 6            | 4.70E-01       | 1.00E+00         |
| <b>Annotation Cluster 52</b> | <b>Enrichment Score: 0.47</b>                                             | <b>Count</b> | <b>P_Value</b> | <b>Benjamini</b> |
| GOTERM_BP_FAT                | <a href="#">homeostasis of number of cells</a>                            | 6            | 5.20E-02       | 8.50E-01         |
| KEGG_PATHWAY                 | <a href="#">intestinal immune network for IgA production</a>              | 4            | 8.30E-02       | 6.60E-01         |
| GOTERM_BP_FAT                | <a href="#">regulation of B cell activation</a>                           | 3            | 2.80E-01       | 9.70E-01         |
| GOTERM_BP_FAT                | <a href="#">regulation of lymphocyte activation</a>                       | 5            | 3.50E-01       | 9.80E-01         |
| GOTERM_BP_FAT                | <a href="#">regulation of leukocyte activation</a>                        | 5            | 4.30E-01       | 9.90E-01         |
| GOTERM_BP_FAT                | <a href="#">positive regulation of T cell activation</a>                  | 3            | 4.60E-01       | 9.90E-01         |
| GOTERM_BP_FAT                | <a href="#">regulation of cell activation</a>                             | 5            | 4.70E-01       | 9.90E-01         |
| GOTERM_BP_FAT                | <a href="#">positive regulation of lymphocyte activation</a>              | 3            | 5.90E-01       | 1.00E+00         |
| GOTERM_BP_FAT                | <a href="#">positive regulation of leukocyte activation</a>               | 3            | 6.30E-01       | 1.00E+00         |
| GOTERM_BP_FAT                | <a href="#">positive regulation of cell activation</a>                    | 3            | 6.60E-01       | 1.00E+00         |
| GOTERM_BP_FAT                | <a href="#">regulation of T cell activation</a>                           | 3            | 6.90E-01       | 1.00E+00         |
| <b>Annotation Cluster 53</b> | <b>Enrichment Score: 0.47</b>                                             | <b>Count</b> | <b>P_Value</b> | <b>Benjamini</b> |
| GOTERM_MF_FAT                | <a href="#">transcription activator activity</a>                          | 12           | 2.10E-01       | 9.80E-01         |
| GOTERM_MF_FAT                | <a href="#">transcription coactivator activity</a>                        | 7            | 2.70E-01       | 9.80E-01         |
| SP_PIR_KEYWORDS              | <a href="#">activator</a>                                                 | 13           | 3.20E-01       | 9.00E-01         |
| GOTERM_MF_FAT                | <a href="#">transcription cofactor activity</a>                           | 9            | 4.50E-01       | 1.00E+00         |
| GOTERM_MF_FAT                | <a href="#">transcription factor binding</a>                              | 11           | 5.90E-01       | 1.00E+00         |

|                              |                                                                                                              |              |                |                  |
|------------------------------|--------------------------------------------------------------------------------------------------------------|--------------|----------------|------------------|
| GOTERM_BP_FAT                | <a href="#">positive regulation of transcription</a>                                                         | 12           | 4.80E-01       | 1.00E+00         |
| GOTERM_BP_FAT                | <a href="#">positive regulation of nucleobase, nucleoside, nucleotide and nucleic acid metabolic process</a> | 13           | 5.00E-01       | 1.00E+00         |
| GOTERM_BP_FAT                | <a href="#">positive regulation of cellular biosynthetic process</a>                                         | 14           | 5.30E-01       | 1.00E+00         |
| GOTERM_BP_FAT                | <a href="#">positive regulation of transcription, DNA-dependent</a>                                          | 10           | 5.30E-01       | 1.00E+00         |
| GOTERM_BP_FAT                | <a href="#">positive regulation of biosynthetic process</a>                                                  | 14           | 5.30E-01       | 1.00E+00         |
| GOTERM_BP_FAT                | <a href="#">positive regulation of nitrogen compound metabolic process</a>                                   | 13           | 5.40E-01       | 1.00E+00         |
| GOTERM_BP_FAT                | <a href="#">positive regulation of RNA metabolic process</a>                                                 | 10           | 5.40E-01       | 1.00E+00         |
| GOTERM_BP_FAT                | <a href="#">positive regulation of macromolecule metabolic process</a>                                       | 16           | 6.40E-01       | 1.00E+00         |
| GOTERM_BP_FAT                | <a href="#">positive regulation of transcription from RNA polymerase II promoter</a>                         | 6            | 8.30E-01       | 1.00E+00         |
| <b>Annotation Cluster 54</b> | <b>Enrichment Score: 0.26</b>                                                                                | <b>Count</b> | <b>P_Value</b> | <b>Benjamini</b> |
| GOTERM_BP_FAT                | <a href="#">negative regulation of protein modification process</a>                                          | 4            | 3.80E-01       | 1.00E+00         |
| GOTERM_BP_FAT                | <a href="#">negative regulation of protein ubiquitination</a>                                                | 3            | 4.00E-01       | 1.00E+00         |
| GOTERM_BP_FAT                | <a href="#">negative regulation of cellular protein metabolic process</a>                                    | 5            | 4.00E-01       | 1.00E+00         |
| GOTERM_BP_FAT                | <a href="#">negative regulation of protein metabolic process</a>                                             | 5            | 4.60E-01       | 1.00E+00         |
| GOTERM_BP_FAT                | <a href="#">regulation of protein ubiquitination</a>                                                         | 3            | 5.60E-01       | 1.00E+00         |
| GOTERM_BP_FAT                | <a href="#">negative regulation of molecular function</a>                                                    | 7            | 5.90E-01       | 1.00E+00         |
| GOTERM_BP_FAT                | <a href="#">regulation of protein modification process</a>                                                   | 6            | 6.50E-01       | 1.00E+00         |
| GOTERM_BP_FAT                | <a href="#">negative regulation of catalytic activity</a>                                                    | 5            | 7.60E-01       | 1.00E+00         |
| GOTERM_BP_FAT                | <a href="#">regulation of cellular protein metabolic process</a>                                             | 7            | 8.80E-01       | 1.00E+00         |
| <b>Annotation Cluster 55</b> | <b>Enrichment Score: 0.26</b>                                                                                | <b>Count</b> | <b>P_Value</b> | <b>Benjamini</b> |
| GOTERM_BP_FAT                | <a href="#">ribosome biogenesis</a>                                                                          | 6            | 3.20E-01       | 1.00E+00         |
| GOTERM_BP_FAT                | <a href="#">ribosome biosynthetic process</a>                                                                | 4            | 5.70E-01       | 1.00E+00         |
| SP_PIR_KEYWORDS              | <a href="#">ribosyltransferase</a>                                                                           | 3            | 9.00E-01       | 1.00E+00         |
| <b>Annotation Cluster 56</b> | <b>Enrichment Score: 0.26</b>                                                                                | <b>Count</b> | <b>P_Value</b> | <b>Benjamini</b> |
| SP_PIR_KEYWORDS              | <a href="#">ribosylase</a>                                                                                   | 12           | 1.50E-01       | 9.20E-01         |
| GOTERM_BP_FAT                | <a href="#">negative regulation of cellular biosynthetic process</a>                                         | 13           | 3.90E-01       | 1.00E+00         |
| GOTERM_BP_FAT                | <a href="#">negative regulation of biosynthetic process</a>                                                  | 13           | 3.80E-01       | 1.00E+00         |
| GOTERM_BP_FAT                | <a href="#">negative regulation of macromolecule metabolic process</a>                                       | 16           | 3.90E-01       | 1.00E+00         |
| GOTERM_BP_FAT                | <a href="#">negative regulation of macromolecule biosynthetic process</a>                                    | 12           | 4.40E-01       | 1.00E+00         |
| GOTERM_BP_FAT                | <a href="#">negative regulation of transcription from RNA polymerase II promoter</a>                         | 6            | 5.60E-01       | 1.00E+00         |
| GOTERM_BP_FAT                | <a href="#">regulation of transcription from RNA polymerase II promoter</a>                                  | 14           | 6.00E-01       | 1.00E+00         |
| GOTERM_BP_FAT                | <a href="#">negative regulation of nucleobase, nucleoside, nucleotide and nucleic acid metabolic process</a> | 10           | 6.20E-01       | 1.00E+00         |
| GOTERM_BP_FAT                | <a href="#">negative regulation of nitrogen compound metabolic process</a>                                   | 10           | 6.30E-01       | 1.00E+00         |
| GOTERM_MF_FAT                | <a href="#">transcription repressor activity</a>                                                             | 6            | 6.90E-01       | 1.00E+00         |
| GOTERM_BP_FAT                | <a href="#">negative regulation of gene expression</a>                                                       | 9            | 7.30E-01       | 1.00E+00         |
| GOTERM_MF_FAT                | <a href="#">transcription repressor activity</a>                                                             | 3            | 7.50E-01       | 1.00E+00         |
| GOTERM_BP_FAT                | <a href="#">chromatin modification</a>                                                                       | 5            | 7.50E-01       | 1.00E+00         |
| GOTERM_BP_FAT                | <a href="#">negative regulation of transcription, DNA-dependent</a>                                          | 6            | 8.00E-01       | 1.00E+00         |
| GOTERM_BP_FAT                | <a href="#">negative regulation of RNA metabolic process</a>                                                 | 6            | 8.10E-01       | 1.00E+00         |
| GOTERM_BP_FAT                | <a href="#">negative regulation of transcription</a>                                                         | 7            | 8.60E-01       | 1.00E+00         |
| <b>Annotation Cluster 57</b> | <b>Enrichment Score: 0.26</b>                                                                                | <b>Count</b> | <b>P_Value</b> | <b>Benjamini</b> |
| GOTERM_BP_FAT                | <a href="#">negative regulation of signal transduction</a>                                                   | 6            | 3.90E-01       | 1.00E+00         |
| GOTERM_BP_FAT                | <a href="#">negative regulation of cell communication</a>                                                    | 6            | 4.90E-01       | 1.00E+00         |
| GOTERM_MF_FAT                | <a href="#">enzyme activator activity</a>                                                                    | 5            | 8.60E-01       | 1.00E+00         |
| <b>Annotation Cluster 58</b> | <b>Enrichment Score: 0.26</b>                                                                                | <b>Count</b> | <b>P_Value</b> | <b>Benjamini</b> |
| SP_PIR_KEYWORDS              | <a href="#">activator</a>                                                                                    | 16           | 4.70E-02       | 7.80E-01         |
| SP_PIR_KEYWORDS              | <a href="#">nucleus</a>                                                                                      | 77           | 5.40E-01       | 9.80E-01         |
| GOTERM_MF_FAT                | <a href="#">DNA binding</a>                                                                                  | 43           | 5.00E-01       | 1.00E+00         |
| GOTERM_BP_FAT                | <a href="#">regulation of RNA metabolic process</a>                                                          | 33           | 6.60E-01       | 1.00E+00         |
| GOTERM_MF_FAT                | <a href="#">transcription regulator activity</a>                                                             | 27           | 6.60E-01       | 1.00E+00         |
| GOTERM_BP_FAT                | <a href="#">regulation of transcription, DNA-dependent</a>                                                   | 32           | 6.80E-01       | 1.00E+00         |
| SP_PIR_KEYWORDS              | <a href="#">dna-binding</a>                                                                                  | 32           | 6.90E-01       | 9.90E-01         |
| SP_PIR_KEYWORDS              | <a href="#">Transcription</a>                                                                                | 35           | 7.20E-01       | 9.90E-01         |
| SP_PIR_KEYWORDS              | <a href="#">transcription regulation</a>                                                                     | 34           | 7.40E-01       | 9.90E-01         |
| GOTERM_BP_FAT                | <a href="#">transcription</a>                                                                                | 36           | 7.90E-01       | 1.00E+00         |
| GOTERM_MF_FAT                | <a href="#">transcription factor activity</a>                                                                | 16           | 7.90E-01       | 1.00E+00         |
| GOTERM_BP_FAT                | <a href="#">regulation of transcription</a>                                                                  | 44           | 8.30E-01       | 1.00E+00         |
| <b>Annotation Cluster 59</b> | <b>Enrichment Score: 0.25</b>                                                                                | <b>Count</b> | <b>P_Value</b> | <b>Benjamini</b> |
| GOTERM_BP_FAT                | <a href="#">chromatin assembly or disassembly</a>                                                            | 4            | 4.20E-01       | 1.00E+00         |
| GOTERM_BP_FAT                | <a href="#">nucleosome assembly</a>                                                                          | 3            | 4.70E-01       | 1.00E+00         |
| GOTERM_BP_FAT                | <a href="#">chromatin assembly</a>                                                                           | 3            | 4.80E-01       | 1.00E+00         |
| GOTERM_BP_FAT                | <a href="#">protein-DNA complex assembly</a>                                                                 | 3            | 5.10E-01       | 1.00E+00         |
| GOTERM_BP_FAT                | <a href="#">nucleosome organization</a>                                                                      | 3            | 5.20E-01       | 1.00E+00         |
| GOTERM_BP_FAT                | <a href="#">DNA packaging</a>                                                                                | 3            | 6.40E-01       | 1.00E+00         |
| GOTERM_BP_FAT                | <a href="#">cellular macromolecular complex subunit organization</a>                                         | 7            | 6.60E-01       | 1.00E+00         |
| GOTERM_BP_FAT                | <a href="#">cellular macromolecular complex assembly</a>                                                     | 6            | 7.10E-01       | 1.00E+00         |
| GOTERM_BP_FAT                | <a href="#">chromatin organization</a>                                                                       | 7            | 7.10E-01       | 1.00E+00         |
| <b>Annotation Cluster 60</b> | <b>Enrichment Score: 0.25</b>                                                                                | <b>Count</b> | <b>P_Value</b> | <b>Benjamini</b> |
| GOTERM_CC_FAT                | <a href="#">nuclear speck</a>                                                                                | 4            | 3.10E-01       | 1.00E+00         |
| GOTERM_CC_FAT                | <a href="#">nuclear body</a>                                                                                 | 4            | 6.30E-01       | 1.00E+00         |
| GOTERM_CC_FAT                | <a href="#">nucleoplasm part</a>                                                                             | 8            | 9.10E-01       | 1.00E+00         |
| <b>Annotation Cluster 61</b> | <b>Enrichment Score: 0.24</b>                                                                                | <b>Count</b> | <b>P_Value</b> | <b>Benjamini</b> |
| GOTERM_CC_FAT                | <a href="#">condensed chromosome</a>                                                                         | 4            | 4.50E-01       | 1.00E+00         |
| GOTERM_BP_FAT                | <a href="#">M phase of meiotic cell cycle</a>                                                                | 3            | 5.50E-01       | 1.00E+00         |
| GOTERM_BP_FAT                | <a href="#">meiosis</a>                                                                                      | 3            | 5.50E-01       | 1.00E+00         |
| GOTERM_BP_FAT                | <a href="#">meiotic cell cycle</a>                                                                           | 3            | 5.60E-01       | 1.00E+00         |
| GOTERM_BP_FAT                | <a href="#">M phase</a>                                                                                      | 7            | 5.80E-01       | 1.00E+00         |
| GOTERM_BP_FAT                | <a href="#">cell cycle phase</a>                                                                             | 7            | 7.90E-01       | 1.00E+00         |
| <b>Annotation Cluster 62</b> | <b>Enrichment Score: 0.24</b>                                                                                | <b>Count</b> | <b>P_Value</b> | <b>Benjamini</b> |
| GOTERM_BP_FAT                | <a href="#">carboxylic acid catabolic process</a>                                                            | 4            | 3.40E-01       | 1.00E+00         |
| GOTERM_BP_FAT                | <a href="#">organic acid catabolic process</a>                                                               | 4            | 3.40E-01       | 1.00E+00         |
| GOTERM_BP_FAT                | <a href="#">cellular amino acid catabolic process</a>                                                        | 3            | 3.60E-01       | 1.00E+00         |
| GOTERM_BP_FAT                | <a href="#">amine catabolic process</a>                                                                      | 3            | 4.30E-01       | 1.00E+00         |
| UP_SEQ_FEATURE               | <a href="#">transit peptide/Mitochondrion</a>                                                                | 7            | 8.50E-01       | 1.00E+00         |
| SP_PIR_KEYWORDS              | <a href="#">transit peptide</a>                                                                              | 7            | 8.60E-01       | 1.00E+00         |
| GOTERM_CC_FAT                | <a href="#">mitochondrial matrix</a>                                                                         | 3            | 9.30E-01       | 1.00E+00         |
| GOTERM_CC_FAT                | <a href="#">mitochondrial lumen</a>                                                                          | 3            | 9.30E-01       | 1.00E+00         |
