# Supplementary material for: Intrarenal activation of adaptive immune effectors is associated with tubular damage and impaired renal function in lupus nephritis
Source: PubMed Central journal article supplement (PMC6241616; doi:10.1136/annrheumdis-2018-213485), 2018-07-31
Supplement: annrheumdis-2018-213485supp010.pdf [file annrheumdis-2018-213485supp010.pdf]

ILMN\_3232889 CCDC144B 0.55292122  
ILMN\_1710923 SLAMF7 0.552702793  
ILMN\_1665964 GAB2 0.552538823  
ILMN\_1688049 SIRA 0.5515103875  
ILMN\_2267383 CU687675 0.551410183  
ILMN\_1656082 H3FA 0.55134115  
ILMN\_1664691 DAPP1 0.550969145  
ILMN\_3235148 FLJ43681 0.550909586  
ILMN\_1734878 CD79A 0.550883029  
ILMN\_1753899 BC111A 0.550696952  
ILMN\_1678842 THBS2 0.550686604  
ILMN\_1805999 MYO1D 0.550593852  
ILMN\_1744604 CYBA 0.550384242  
ILMN\_3246391 SNORD52 0.550299649  
ILMN\_2367753 ATP2B4 0.549909557  
ILMN\_1745533 FAM117A 0.54959491  
ILMN\_1700935 HAS2 0.549571013  
ILMN\_3246560 EMB 0.549285006  
ILMN\_1727043 GLT2SD1 0.548728586  
ILMN\_2366041 ITM2C 0.548725912  
ILMN\_1738681 NUP62 0.548626944  
ILMN\_1764754 RAMP1 0.548623472  
ILMN\_1720124 RCC2 0.548578614  
ILMN\_1701424 LAMC2 0.548480763  
ILMN\_1702585 SET 0.548444111  
ILMN\_1734653 FNDC1 0.548360055  
ILMN\_1652223 WDR91 0.5483242  
ILMN\_2124757 DMEZ6A70104 0.548217269  
ILMN\_1802523 HS3T5 0.548055696  
ILMN\_2402341 MAPK3 0.54803558  
ILMN\_3229210 FLJ45340 0.548027104  
ILMN\_2145501 ANGP1L1 0.547941147  
ILMN\_1772148 SULT1C4 0.547935313  
ILMN\_1661266 HLA-DQB1 0.547896835  
ILMN\_1716080 CBL 0.547829669  
ILMN\_2071809 MGP 0.547754686  
ILMN\_1651278 SNP1 0.547535533  
ILMN\_1749011 NCAP2 0.547400754  
ILMN\_1776464 PABPA 0.54721293  
ILMN\_1779185 SPECC1L 0.547141821  
ILMN\_1781468 SMAF2 0.547100114  
ILMN\_1658411 CHD4 0.546917272  
ILMN\_2367707 PKN1 0.546643632  
ILMN\_2408400 NOL9 0.546475799  
ILMN\_1744113 SCMN1 0.546437795  
ILMN\_1786197 NR2F1 0.546252144  
ILMN\_1805693 GMIP 0.546201792  
ILMN\_2323491 NUP62 0.546185502  
ILMN\_1702592 WDR73 0.545864042  
ILMN\_1910908 BC205162 0.5458384  
ILMN\_1691487 TRAF2 0.545723381  
ILMN\_1669727 WAC 0.545671025  
ILMN\_2375319 RASGRP2 0.545668792  
ILMN\_2340131 MAPK10 0.545477793  
ILMN\_1698666 CST6 0.545464783  
ILMN\_1688381 BPTF 0.545358876  
ILMN\_1662166 PTK7 0.545296129  
ILMN\_1711994 TCIRG1 0.54517658  
ILMN\_1769911 SLC38A1 0.545103305  
ILMN\_1712389 CMTM1 0.545019123  
ILMN\_1805429 CD44 0.544977202  
ILMN\_1815652 C1011 and JK 0.544935566  
ILMN\_1654031 TPTX2 0.544926855  
ILMN\_1699160 ITK 0.544809408  
ILMN\_1795442 LAMA4 0.544654643  
ILMN\_1666819 PHLD81 0.544619949  
ILMN\_1903914 AK129699 0.544588846  
ILMN\_1689004 TRAF6F12A 0.544524564  
ILMN\_1766408 CBF8 0.5441134546  
ILMN\_1786024 POLR3H 0.54395202  
ILMN\_1665985 SPODYE7 0.543883902  
ILMN\_1676241 BCOR 0.543717463  
ILMN\_1679268 PELI1 0.543698603  
ILMN\_2350266 FOXK46 0.543693315  
ILMN\_2155719 NBPFL 0.543593059  
ILMN\_2114720 SLPI 0.5435842  
ILMN\_1672661 SP110 0.543398714  
ILMN\_1802100 ADAM28 0.543392053  
ILMN\_2380237 C107NF1 0.543376599  
ILMN\_1678290 HMG20A 0.543291512  
ILMN\_2319910 DGKA 0.543127105  
ILMN\_1799062 NFKB2 0.543124885  
ILMN\_1753805 PRKD2 0.543106627  
ILMN\_1765021 TOP3B 0.542844661  
ILMN\_1677165 LBP8 0.542822512  
ILMN\_1765702 GPAA1 0.542756818  
ILMN\_1767349 ABCB4 0.542252334  
ILMN\_2403555 DHX30 0.541823749  
ILMN\_1683781 ADAMTS15 0.54176659  
ILMN\_3236381 MXR48 0.541723628  
ILMN\_2358914 SLC35C2 0.541648441  
ILMN\_1768031 MTOR 0.541447789  
ILMN\_1782741 CD300LB 0.541439873  
ILMN\_1719237 SPODYE8 0.541089119  
ILMN\_1790859 PLAC9 0.541046739  
ILMN\_1758823 SMARCB1 0.540769103  
ILMN\_1706505 COL5A1 0.540648881  
ILMN\_2112638 SVEP1 0.540270113

ILMN\_3236052 SNORD198 -0.432305533  
ILMN\_1724040 ANKRD57 -0.432323418  
ILMN\_1724266 LYPO2 -0.432366109  
ILMN\_1665821 DWF8 -0.4323505727  
ILMN\_1713964 ITAD3 -0.432601182  
ILMN\_3309524 MIR122 -0.432684615  
ILMN\_1766966 ACSM5 -0.432711135  
ILMN\_1669572 RNF126 -0.43275224  
ILMN\_1681249 RIF21A -0.4328047  
ILMN\_1689070 COO7 -0.432921241  
ILMN\_2189371 NNTG1 -0.433017117  
ILMN\_2385410 GPX5 -0.433064277  
ILMN\_1754929 OR6N1 -0.433155779  
ILMN\_1911171 DB337954 -0.433319493  
ILMN\_1695731 TUBG1 -0.433353588  
ILMN\_1855067 AW665831 -0.433422119  
ILMN\_2155452 HPR -0.433490506  
ILMN\_1888264 DB302602 -0.433503941  
ILMN\_1718971 TTC7B -0.433622644  
ILMN\_1712523 MAP6 -0.433789726  
ILMN\_1655589 ASAH1 -0.433795221  
ILMN\_1705458 DR2W3 -0.433802511  
ILMN\_1740576 BC169297 -0.433868348  
ILMN\_1673716 KIF6 -0.433914223  
ILMN\_3249654 UDX -0.433969337  
ILMN\_1670725 SYT16 -0.433978467  
ILMN\_1795289 SCOR9H -0.434000431  
ILMN\_1682988 RNF34 -0.434042364  
ILMN\_2075962 DSCAML1 -0.434052981  
ILMN\_3235171 CDDC64B -0.434093153  
ILMN\_1800179 KCNJ4 -0.434094402  
ILMN\_2366565 MTK2 -0.434099124  
ILMN\_2014938 RBAK -0.43421343  
ILMN\_1776577 DSCC1 -0.43431878  
ILMN\_1656940 ABUM3 -0.434432128  
ILMN\_1895763 BC030212 -0.434497221  
ILMN\_2067408 CLRN3 -0.434514999  
ILMN\_1684885 RFRPA4-8 -0.434639599  
ILMN\_1748366 SLC5A9 -0.434656596  
ILMN\_3237956 ZCCH12C -0.434663863  
ILMN\_1766028 TBC1D26 -0.434792267  
ILMN\_1908074 AV750156 -0.434819831  
ILMN\_1665887 WDR61 -0.434890729  
ILMN\_1675018 RQC4 -0.434959631  
ILMN\_1669034 CCL15 -0.434991748  
ILMN\_1670255 MAGEA8B -0.435002146  
ILMN\_1680353 NSF -0.435053281  
ILMN\_2393461 DDO -0.435145971  
ILMN\_1765401 RRM3 -0.435297486  
ILMN\_1671427 FBXW4 -0.435338758  
ILMN\_1652646 DMXL1 -0.435339313  
ILMN\_2293594 LAMA3 -0.435355689  
ILMN\_2076567 UBE2V2 -0.435397841  
ILMN\_3252185 BC037739 -0.435398496  
ILMN\_1668932 CTR12 -0.435476039  
ILMN\_2101988 NA -0.435476991  
ILMN\_1675346 CCR12 -0.435518175  
ILMN\_3243129 SNHG7 -0.435518254  
ILMN\_2219556 ISCA1 -0.435650919  
ILMN\_1668490 UNCX -0.435683278  
ILMN\_1847602 HARIA -0.435803635  
ILMN\_1802223 ATP2B2 -0.435811298  
ILMN\_1808938 PIGF -0.436006095  
ILMN\_1742586 Tmprss511F -0.436052742  
ILMN\_1752668 DAAM2 -0.436105858  
ILMN\_2392674 PRR3 -0.436142688  
ILMN\_1708611 RDX -0.436376696  
ILMN\_1812073 ATP19B1 -0.436440442  
ILMN\_2269002 MANEA -0.436517619  
ILMN\_1729816 VDCA3 -0.436553347  
ILMN\_1689098 ATP1A3 -0.436619687  
ILMN\_1712137 LOC100128219 -0.436697467  
ILMN\_1744483 HPS1 -0.4367126  
ILMN\_1753286 MYO19 -0.437103377  
ILMN\_1699562 EFCAB1 -0.437133167  
ILMN\_1727091 ACM5D -0.437135898  
ILMN\_3309489 MIRS63 -0.437139838  
ILMN\_1681651 FOLH1 -0.437158108  
ILMN\_1696751 A636007 -0.4371919  
ILMN\_1779857 HPS1 -0.437211213  
ILMN\_1738967 HS2ST1 -0.437240421  
ILMN\_1762327 DHR12 -0.437257816  
ILMN\_3238259 SNORA30 -0.437264859  
ILMN\_1827050 BC011235 -0.437295522  
ILMN\_1726469 HRT3 -0.437306792  
ILMN\_1792182 RDH12 -0.437378101  
ILMN\_1796583 CLRN2 -0.437395407  
ILMN\_1686083 MAGEA11 -0.437550747  
ILMN\_1702739 TMEM146 -0.43760553  
ILMN\_1704544 DR2L13 -0.43769345  
ILMN\_3240180 SNORD90 -0.437823483  
ILMN\_1707426 CRVA -0.437919518  
ILMN\_3288525 NA -0.437932808  
ILMN\_3237022 SCGB1C1 -0.437951591  
ILMN\_1675671 ICOSLG -0.437958388  
ILMN\_1703961 BC00551 -0.438135509  
ILMN\_1669866 SLC5A31 -0.438183162  
ILMN\_1706301 RET -0.438182644



ILMN\_3270833 NA 0.539841587  
ILMN\_1789186 OBFC1 0.53969901  
ILMN\_1814998 POTE1P 0.539678705  
ILMN\_2110908 MYC 0.539609467  
ILMN\_1804117 FAM89B 0.539544192  
ILMN\_2178226 KRT86 0.539541131  
ILMN\_1703305 TW2 0.539526755  
ILMN\_1786843 KCTD13 0.539383377  
ILMN\_1704294 CDH3 0.539228445  
ILMN\_1698023 ZAK 0.539077767  
ILMN\_1809484 TMOD3 0.53900706  
ILMN\_3289171 RPS27 0.53856999  
ILMN\_1749006 RCD1 0.538425879  
ILMN\_1705750 TGM2 0.538392247  
ILMN\_2352202 PTK7 0.538364395  
ILMN\_1694778 KRT18 0.538254575  
ILMN\_2355738 INCENP 0.538148445  
ILMN\_1682332 GYPC 0.537897769  
ILMN\_1656732 LOC440300 0.537732381  
ILMN\_1758324 SLC05A1 0.537693217  
ILMN\_1795025 NF1 0.537601725  
ILMN\_1755173 PLEKH4A 0.53761862  
ILMN\_1691892 TAGLN2 0.537611163  
ILMN\_2203950 HLA-A 0.537421579  
ILMN\_2146566 CLASRP 0.537314354  
ILMN\_1711272 SERPINE1 0.537180051  
ILMN\_1760309 RPS2 0.537150013  
ILMN\_2282641 TBXA1 0.537021197  
ILMN\_1778144 SLC48A1 0.536886462  
ILMN\_1786697 TRIM9 0.536865233  
ILMN\_3309995 MIR383 0.536789307  
ILMN\_2342579 IL7R 0.536487734  
ILMN\_2403852 CTHL1 0.536431858  
ILMN\_2406716 CDC41 0.536306974  
ILMN\_1775692 EIF4G3 0.53628433  
ILMN\_1741371 TMEM8A 0.536266053  
ILMN\_3183573 NA 0.536198637  
ILMN\_2349701 GPR64 0.536091202  
ILMN\_3251361 NRP1 0.536053446  
ILMN\_2347693 NCOA3 0.536022658  
ILMN\_1803810 RRP1 0.535994997  
ILMN\_1659688 LGALS3BP 0.535808574  
ILMN\_1764770 OXNAD1 0.535799278  
ILMN\_1795241 SODS1 0.535717137  
ILMN\_2367469 CARS 0.535713395  
ILMN\_2353862 LRRC48 0.535610478  
ILMN\_1798679 ANO9 0.535524838  
ILMN\_1741585 SFMBT1 0.535242418  
ILMN\_1689111 CC112 0.535187637  
ILMN\_1763488 RNASIH2B 0.535066608  
ILMN\_2169801 TFS4B1 0.53499045  
ILMN\_1790533 PHACTR2 0.534988834  
ILMN\_2371053 EFN1 0.534823103  
ILMN\_2225135 GCNT1 0.534711059  
ILMN\_2309220 NA 0.534440962  
ILMN\_1793012 OTUB2 0.534427731  
ILMN\_1716276 CCL4 0.534356305  
ILMN\_1740633 PRF1 0.534334227  
ILMN\_2105441 IGI 0.534199307  
ILMN\_1702691 TNFAIP3 0.534136986  
ILMN\_1726289 C12orf75 0.534024145  
ILMN\_1703018 MLL3 0.534004102  
ILMN\_1750700 NLGN3 0.533918795  
ILMN\_1730842 PTPRC 0.533838566  
ILMN\_1674250 NCKAP1 0.533623878  
ILMN\_2390299 PSM88 0.533598609  
ILMN\_1808707 FSN1 0.533359104  
ILMN\_1650206 BTK 0.533337906  
ILMN\_3307930 RAN 0.533326757  
ILMN\_2282657 ARHGAP9 0.53319793  
ILMN\_2205050 PRKX 0.532711768  
ILMN\_2257015 AGER 0.532659845  
ILMN\_2327346 SSBP4 0.532605223  
ILMN\_2352190 CLP2 0.532611097  
ILMN\_1778625 CD44 0.532596113  
ILMN\_3237966 KIAA1004 0.532593702  
ILMN\_1693762 LRRC48 0.532585856  
ILMN\_1680772 TCRG9 0.532563872  
ILMN\_1774836 PLOD3 0.532518204  
ILMN\_1810037 RUSC2 0.532393327  
ILMN\_2367384 EPH32 0.532381904  
ILMN\_1719972 PLXNA3 0.5322351  
ILMN\_1771599 PLOD2 0.532222667  
ILMN\_1710216 AVEN 0.531921417  
ILMN\_2186133 FABP1 0.531819284  
ILMN\_1682778 MYX4B 0.53177551  
ILMN\_1786668 TAGLN 0.531699296  
ILMN\_1754279 FBXW7 0.531558561  
ILMN\_1762046 ZNF551 0.531549438  
ILMN\_1659103 PSM48 0.531461181  
ILMN\_2328433 NOP2 0.531219462  
ILMN\_1733221 SEM4AD 0.531160484  
ILMN\_2375992 SPINT1 0.530748077  
ILMN\_1653871 NAMPT 0.530615214  
ILMN\_1655137 ZCHHC11 0.53061132  
ILMN\_3251733 C19orf43 0.530610709  
ILMN\_1721241 CTHF2 0.530565084  
ILMN\_1668039 GYPC 0.530287297

ILMN\_2375386 RNP51 -0.438282898  
ILMN\_1866389 RQ182905 -0.438296536  
ILMN\_1754570 KCTD8 -0.438412482  
ILMN\_1888359 BMP1B -0.438502315  
ILMN\_2395932 UNC45A -0.438510487  
ILMN\_1910307 BM987531 -0.438541697  
ILMN\_1900604 BX108309 -0.438569901  
ILMN\_3179396 MUC7 -0.438626072  
ILMN\_2098743 KCO113 -0.43863743  
ILMN\_2327646 EFCAB8 -0.438658344  
ILMN\_1730611 RTN4 -0.438756614  
ILMN\_1664371 HIATL1 -0.438785502  
ILMN\_1903159 PPM1A -0.438895313  
ILMN\_3251648 ACQ7P1 -0.439041213  
ILMN\_1798888 SAK1B -0.43905964  
ILMN\_1651752 C6orf121 -0.439076647  
ILMN\_1771841 FOSL1 -0.439124369  
ILMN\_1801608 KCNN3 -0.439216439  
ILMN\_2170595 RRM2B -0.439300346  
ILMN\_1727278 FAM75A5 -0.439329654  
ILMN\_3265444 CQO59386 -0.439355251  
ILMN\_2206420 UGT1A1 -0.439368527  
ILMN\_2406634 DNMT3L -0.439381504  
ILMN\_3236866 ULK4 -0.439445893  
ILMN\_1798853 CTS1LP2 -0.439475566  
ILMN\_1707342 IIRIG1 -0.439516518  
ILMN\_1722850 VGLL2 -0.439631621  
ILMN\_1746552 WDR17 -0.439669298  
ILMN\_1671547 HMG2A -0.439674587  
ILMN\_1695965 FAM36A -0.439727135  
ILMN\_1808979 CLEC4D -0.439844365  
ILMN\_1687265 KXFF5 -0.439854203  
ILMN\_1772814 NLK -0.439894779  
ILMN\_1668736 AX748125 -0.439903351  
ILMN\_1727605 FRK -0.439977517  
ILMN\_1736969 SLITR3 -0.439984436  
ILMN\_1716517 KIAA0467 -0.439985538  
ILMN\_1794903 TSP4N33 -0.439991803  
ILMN\_1654171 LOC11720 -0.439998783  
ILMN\_1755354 YBK2 -0.440050282  
ILMN\_1661458 ARF1 -0.440063555  
ILMN\_1683302 SMC4 -0.44015941  
ILMN\_1915480 BX107598 -0.440227206  
ILMN\_1852179 BK118817 -0.440292996  
ILMN\_1692831 WST11A1 -0.440321411  
ILMN\_1707368 OPRD1 -0.440267259  
ILMN\_1746819 CS -0.440288879  
ILMN\_1736453 RCVRN -0.440331465  
ILMN\_2147503 ALG13 -0.44035349  
ILMN\_2152028 AHD7082 -0.440368812  
ILMN\_2407308 HEY1 -0.44052676  
ILMN\_2258977 XAGE1A -0.440693012  
ILMN\_1776685 PCDH15 -0.440703926  
ILMN\_3237520 C6orf127 -0.440759862  
ILMN\_3272101 LOC100130429 -0.440843584  
ILMN\_1771860 PRKCA -0.440849673  
ILMN\_1846499 A1376590 -0.440869235  
ILMN\_1662453 PRDM6 -0.440934371  
ILMN\_1726603 ATP5I -0.440940781  
ILMN\_3235231 SNORA49 -0.441020894  
ILMN\_3182898 LIDWCD1-190B.1 -0.441042855  
ILMN\_2407346 DHD1 -0.441096311  
ILMN\_1812678 AGMO -0.441118254  
ILMN\_1750062 PPARG1A -0.441154263  
ILMN\_1672591 SCN9A -0.441281912  
ILMN\_1756852 AUP1 -0.441346639  
ILMN\_3206163 NA -0.441360934  
ILMN\_1809245 PTPRN -0.441445006  
ILMN\_3280269 FLDJ0317 -0.441637463  
ILMN\_1810785 RNF11 -0.441666978  
ILMN\_2231911 AUH -0.44179334  
ILMN\_2245087 MAF2P -0.441808023  
ILMN\_1741971 KIAA1161 -0.441899959  
ILMN\_1767070 WNL5S -0.441898736  
ILMN\_1734762 OPA3 -0.442022966  
ILMN\_1709815 PURG -0.442052542  
ILMN\_2358278 RSR2 -0.442073627  
ILMN\_1840316 BCO64139 -0.44213748  
ILMN\_1680251 SORCS1 -0.44217703  
ILMN\_1670172 WDR33 -0.442179968  
ILMN\_1767274 FBL1 -0.44219475  
ILMN\_1769684 LCEE1 -0.442247469  
ILMN\_1666363 FOXN1 -0.442275576  
ILMN\_2205162 ZNF699 -0.442277901  
ILMN\_1763568 RGN -0.442301057  
ILMN\_1786273 C1orf122 -0.442301786  
ILMN\_1810684 TINAG -0.442311751  
ILMN\_3276263 SMARCA1 -0.442318148  
ILMN\_1780551 ADRA1A -0.442396256  
ILMN\_1866337 AKO93987 -0.442565997  
ILMN\_1726437 EFCAB3 -0.442583497  
ILMN\_1748251 ABHD2 -0.44279715  
ILMN\_1748543 STRC -0.442820405  
ILMN\_1738246 OR10A7 -0.442825442  
ILMN\_2211780 SLC25A4 -0.442884928  
ILMN\_1798485 ATP6V1E1 -0.443147261  
ILMN\_1724410 SLC16A9 -0.443226705  
ILMN\_2189314 HDGF1 -0.443342522

ILMN\_1753064 TTC13 0.530199899  
ILMN\_1708077 DAXX 0.530180592  
ILMN\_2355953 IILBR4 0.530129682  
ILMN\_2328972 DMNTFB 0.529989845  
ILMN\_1738424 CDC42 0.529974729  
ILMN\_1663866 TGFBI 0.529822779  
ILMN\_2312906 MIA3 0.529781779  
ILMN\_2349129 DPP3 0.529641755  
ILMN\_1715024 ISS 0.529616126  
ILMN\_2312158 MBNL1 0.529428999  
ILMN\_1766955 VCAM1 0.529413749  
ILMN\_1701441 LPAR1 0.529321409  
ILMN\_1733511 GOLGA3 0.529273901  
ILMN\_1781916 AV72307 0.528964564  
ILMN\_2108709 ANKRD11 0.528895006  
ILMN\_2354466 NTM 0.528732544  
ILMN\_1714499 TLK2 0.528386891  
ILMN\_1795454 CP5F6 0.528382182  
ILMN\_1724533 LY96 0.528332172  
ILMN\_2352380 TRPM2 0.52813751  
ILMN\_2049021 PTTG3 0.527670943  
ILMN\_2169439 ITGAV 0.527619679  
ILMN\_1804444 PDI2 0.52736693  
ILMN\_1696839 RPS27 0.527276796  
ILMN\_3301101 AKO27616 0.527025418  
ILMN\_2396444 CD14 0.52699294  
ILMN\_1701308 CDL1L1 0.52689929  
ILMN\_3264073 RPS27 0.5269222  
ILMN\_3225505 RPS8 0.526736277  
ILMN\_1806956 ATAD5 0.52669634  
ILMN\_1670134 FADS1 0.52667533  
ILMN\_1288161 RPS27 0.526461928  
ILMN\_1695354 BNF 0.52643404  
ILMN\_1698067 NBPFL1 0.526426542  
ILMN\_1860540 AA709087 0.526397893  
ILMN\_1684647 ILKAP 0.526387807  
ILMN\_1735014 KLF6 0.52634619  
ILMN\_1761155 PABPC1 0.52613115  
ILMN\_1740385 CPT1B 0.526034435  
ILMN\_1772113 UZF1 0.52594375  
ILMN\_1737964 HIATL1 0.525853067  
ILMN\_1672547 MYO9B 0.525791659  
ILMN\_1743646 VASP 0.525591436  
ILMN\_2070072 RPS7 0.525204784  
ILMN\_1680102 C11orf45 0.52493396  
ILMN\_1683415 CAMK2D 0.524934928  
ILMN\_1766222 LARP4B 0.524819385  
ILMN\_3247802 PRR2B 0.524571078  
ILMN\_1800425 SLC9A1 0.524483562  
ILMN\_1784348 STARD5 0.52448515  
ILMN\_1685905 TM6SF1A 0.52423743  
ILMN\_2400352 LRDD 0.524223833  
ILMN\_1741003 ANXA5 0.524103929  
ILMN\_1756071 MFG8 0.524002305  
ILMN\_1756360 RPL35A 0.523218248  
ILMN\_1732997 RHA1949 0.523135629  
ILMN\_1777344 RPL13 0.523025119  
ILMN\_1663577 S100PBP 0.523014136  
ILMN\_1686116 THBS1 0.522963866  
ILMN\_1723978 LGLS1 0.522886886  
ILMN\_1724293 KDELR2 0.52274885  
ILMN\_1814799 S100A13 0.522540721  
ILMN\_2380850 SODCAG3 0.522439665  
ILMN\_1654099 LRIG2 0.522323776  
ILMN\_1806017 PSME1 0.522186205  
ILMN\_1674640 CXCR6 0.521975711  
ILMN\_1780663 KLHL30 0.521910788  
ILMN\_1681591 PTPN1 0.521761328  
ILMN\_1700628 DDX24 0.521760279  
ILMN\_2354334 ATXN2L 0.521663211  
ILMN\_1789418 GSTT2B 0.521561723  
ILMN\_1659158 SAMD03 0.521391493  
ILMN\_1842582 TTC39C 0.521213291  
ILMN\_1715695 NFKB2 0.521158695  
ILMN\_1763842 PTHR1 0.521018699  
ILMN\_1658677 DTX3 0.520952299  
ILMN\_1670841 CPNE1 0.520728643  
ILMN\_2381037 UMS1 0.520686218  
ILMN\_1801934 SERTAD3 0.520669695  
ILMN\_1761994 POLB 0.520512762  
ILMN\_2219712 HMG2B 0.520494704  
ILMN\_2170814 LAMP3 0.520478717  
ILMN\_3246005 KDM5B 0.520373166  
ILMN\_1651788 MAP3K11 0.520184928  
ILMN\_1691598 RIN4 0.519949896  
ILMN\_1809928 COL6A2 0.519791821  
ILMN\_1773276 WHAMML2 0.519716383  
ILMN\_1675162 AKO97193 0.519621796  
ILMN\_1745994 GAS7 0.519423444  
ILMN\_2338348 UBASH3A 0.519396627  
ILMN\_1708375 IRF1 0.519317006  
ILMN\_2106331 H3F3A 0.519306227  
ILMN\_1805466 SOX9 0.519264633  
ILMN\_1761797 CSTB 0.519196864  
ILMN\_1693218 ART3 0.519157669  
ILMN\_1790918 ZNF236 0.519085678  
ILMN\_1808501 SIK3BP1 0.518804449  
ILMN\_2379734 CTBP1 0.518786728

ILMN\_1907218 BM973226 -0.443394293  
ILMN\_1906678 BK117604 -0.443541169  
ILMN\_1900929 DR7E12P -0.443564548  
ILMN\_2297082 LOC729800 -0.443703264  
ILMN\_1814526 ADD3 -0.44375417  
ILMN\_1657679 VAV3 -0.443811158  
ILMN\_1763187 PAK4 -0.443855987  
ILMN\_3266764 LOC728448 -0.443869614  
ILMN\_1737402 HEATR2 -0.443930474  
ILMN\_1764861 ISOC1 -0.443934489  
ILMN\_1715742 SLC22A1 -0.44397213  
ILMN\_1797201 KRTP10-2 -0.443980551  
ILMN\_1786433 BCCIP -0.443990109  
ILMN\_2371147 BCL7C -0.444015661  
ILMN\_1701058 TATDN1 -0.44401947  
ILMN\_3310548 MIR89B -0.444077985  
ILMN\_1695355 FOXP2 -0.444178607  
ILMN\_3251283 HDAC2 -0.444518742  
ILMN\_3239912 HSFY1 -0.444529869  
ILMN\_1690979 SLC17A3 -0.444533223  
ILMN\_2176450 CA3 -0.444571305  
ILMN\_1779032 SDHC -0.444613106  
ILMN\_2171783 CPEB3 -0.444653532  
ILMN\_1657855 ACTL6B -0.444688295  
ILMN\_2238795 NEK3 -0.444720442  
ILMN\_2094294 NR2E1 -0.444726992  
ILMN\_2054053 TMEH6P -0.444767356  
ILMN\_1775441 ARHGAP24 -0.444776493  
ILMN\_1896277 BC037739 -0.444934824  
ILMN\_2279645 BCL2L14 -0.444961639  
ILMN\_2093674 GMFB -0.444974128  
ILMN\_2197208 GOLC1A -0.445004196  
ILMN\_1680560 LOC1048709 -0.445037287  
ILMN\_3311075 MIR1915 -0.445444389  
ILMN\_1728746 GAB2 -0.445483396  
ILMN\_1725352 RUVBL1 -0.445526174  
ILMN\_2340643 INSC -0.445593881  
ILMN\_1794206 NPSF1 -0.445618886  
ILMN\_1852756 RCGD10B9 -0.445713894  
ILMN\_1802246 KLIK10 -0.445737972  
ILMN\_1678546 PEX11B -0.445915264  
ILMN\_1656638 BHMT -0.445972055  
ILMN\_3237085 NTF4 -0.446100033  
ILMN\_1663118 RASGEF1C -0.446122005  
ILMN\_1703459 HNTF89 -0.446171697  
ILMN\_1874302 BEG46122 -0.446319413  
ILMN\_1796075 VPS41 -0.44634519  
ILMN\_1756623 NTS1B -0.446348625  
ILMN\_1994301 MECF1 -0.446457844  
ILMN\_2349595 ACSL2 -0.446458572  
ILMN\_1689473 ATP6V1H -0.446591268  
ILMN\_1765232 RNLS -0.446756943  
ILMN\_3237779 TMEH184C -0.446843877  
ILMN\_1787657 CDK14 -0.446966445  
ILMN\_1799104 ZCCHC10 -0.446989846  
ILMN\_3140660 LOC1028205 -0.447020723  
ILMN\_1786388 RNF113A -0.447083526  
ILMN\_1720531 KDM4B -0.447351029  
ILMN\_1680673 NTSOC1 -0.447372204  
ILMN\_1751897 PM20D1 -0.447452213  
ILMN\_1718135 PRAMEF11 -0.447616763  
ILMN\_1805223 BANF2 -0.447731542  
ILMN\_1768913 TSN -0.447804237  
ILMN\_1658017 SPN -0.447928196  
ILMN\_2357062 ILIRAP -0.447959276  
ILMN\_2209180 RPRD1A -0.448000042  
ILMN\_1788625 EXOC5 -0.448196038  
ILMN\_1659718 ATRF1 -0.448311509  
ILMN\_1710652 MTMR8 -0.448383171  
ILMN\_1784578 LRR3C3A3 -0.448410958  
ILMN\_1914284 AI191966 -0.448468775  
ILMN\_1751814 DDX11L2 -0.448568101  
ILMN\_1893936 BM684558 -0.448586777  
ILMN\_1782795 GAGC12B -0.448590728  
ILMN\_1728785 GPR116 -0.448706382  
ILMN\_1751941 TMEH106A -0.448708562  
ILMN\_1795778 PAHA2 -0.448948229  
ILMN\_1652357 PDHX -0.449005874  
ILMN\_1737381 FSD1 -0.449106425  
ILMN\_2204297 DKF554F1378 -0.449361865  
ILMN\_1692056 HSSST3A1 -0.449364863  
ILMN\_2371001 ATP6V1G3 -0.44936908  
ILMN\_1771019 MTMR4 -0.449408516  
ILMN\_1764850 HPCAL1 -0.449493079  
ILMN\_1691984 ADO5282 -0.449593453  
ILMN\_2248857 IL20 -0.449555191  
ILMN\_1694491 CCNG1 -0.449563379  
ILMN\_1680727 GLRX2 -0.449586196  
ILMN\_1727205 ARHGFE10L -0.449590924  
ILMN\_1727178 C11orf92 -0.449617132  
ILMN\_1807866 PARG -0.449636649  
ILMN\_1789702 GREL -0.44987261  
ILMN\_1736546 SLC16A14 -0.449917903  
ILMN\_3182102 MUC12 -0.449970799  
ILMN\_1661500 BAGALT4 -0.450119101  
ILMN\_1697175 TAF8 -0.450158576  
ILMN\_3219173 HARPAL -0.450205968  
ILMN\_1745343 ZMAT2 -0.450268456



|              |           |             |
|--------------|-----------|-------------|
| ILMN_1802456 | OCTO      | 0.509131786 |
| ILMN_1787844 | Cl9orf10  | 0.509128331 |
| ILMN_1677906 | PTMA      | 0.509004327 |
| ILMN_1808202 | Cl9orf2   | 0.508990986 |
| ILMN_1715175 | CEBPA     | 0.508837293 |
| ILMN_1742929 | HESX1     | 0.508824051 |
| ILMN_1718303 | PVRL2     | 0.50877734  |
| ILMN_1713384 | TSHX2     | 0.508727764 |
| ILMN_2229119 | SBOCK     | 0.508649377 |
| ILMN_2339266 | LAMA2     | 0.508490999 |
| ILMN_2318558 | HCFC1R1   | 0.508338613 |
| ILMN_1669286 | YWHAZ     | 0.508259404 |
| ILMN_1768940 | COL15A1   | 0.508141221 |
| ILMN_1653601 | TLK2      | 0.50813116  |
| ILMN_1799134 | KLRD1     | 0.50810044  |
| ILMN_3348975 | PP4C      | 0.507814645 |
| ILMN_1685810 | NFATC3    | 0.507631583 |
| ILMN_1794987 | Cl7orf100 | 0.507598878 |
| ILMN_1668748 | MED15     | 0.507582006 |
| ILMN_1735548 | HVEP1     | 0.507572491 |
| ILMN_2145670 | TNC       | 0.507480853 |
| ILMN_1747195 | PSM88     | 0.507441401 |
| ILMN_1717737 | FKBP7     | 0.507392499 |
| ILMN_2388711 | SIRT2     | 0.507386135 |
| ILMN_1705522 | SPAG1     | 0.507218642 |
| ILMN_1722781 | EGR3      | 0.507193294 |
| ILMN_2133360 | RPS2      | 0.507070177 |
| ILMN_1820845 | NA        | 0.50703923  |
| ILMN_1666049 | NUP214    | 0.506981642 |
| ILMN_1744487 | ClQTNF5   | 0.506955012 |
| ILMN_1699206 | FHDC1     | 0.50694868  |
| ILMN_1743130 | PTGFRN    | 0.506847987 |
| ILMN_2246882 | SP148     | 0.506827386 |
| ILMN_1715169 | HLA-DQB1  | 0.506819474 |
| ILMN_2206098 | ATG10     | 0.506759035 |
| ILMN_1768505 | IL13RA1   | 0.506755885 |
| ILMN_1691843 | RNP51     | 0.506684344 |
| ILMN_2148139 | TUBA1A    | 0.506667743 |
| ILMN_2267296 | SYF2      | 0.506447865 |
| ILMN_1737205 | MCM4      | 0.506270707 |
| ILMN_3282436 | E1F3F     | 0.506255021 |
| ILMN_1677466 | DUSP6     | 0.506237651 |
| ILMN_1761159 | ESY11     | 0.506101833 |
| ILMN_1764980 | SEKIPW1A  | 0.506035923 |
| ILMN_3248667 | HLA-DQA1  | 0.505830211 |
| ILMN_1660832 | RPL18A    | 0.505686184 |
| ILMN_1668417 | WIPF1     | 0.50558921  |
| ILMN_1745420 | PHF19     | 0.505565869 |
| ILMN_1798234 | KDM5C     | 0.505260784 |
| ILMN_1731714 | CREB5     | 0.505214628 |
| ILMN_1676868 | RAB37     | 0.505029132 |
| ILMN_3243909 | SNORD102  | 0.504939992 |
| ILMN_3275345 | RPS27     | 0.504934823 |
| ILMN_3248247 | LOC349114 | 0.504832849 |
| ILMN_1679319 | PSP1      | 0.504615319 |
| ILMN_1692539 | SH3BP1    | 0.504529664 |
| ILMN_2123743 | FCEB1G    | 0.504527155 |
| ILMN_3251100 | MEF2A     | 0.504472912 |
| ILMN_1754894 | Clorf162  | 0.504445438 |
| ILMN_1801118 | SNRNP25   | 0.504395879 |
| ILMN_1714489 | CB2       | 0.504336777 |
| ILMN_1764201 | MAR2      | 0.504245777 |
| ILMN_1786612 | PSME2     | 0.504243476 |
| ILMN_2167805 | LUM       | 0.504212169 |
| ILMN_1751572 | TLE1      | 0.504062806 |
| ILMN_3307887 | PRR14L    | 0.503915548 |
| ILMN_1692168 | UBE2Z     | 0.503888953 |
| ILMN_3238375 | ClNPT     | 0.503814022 |
| ILMN_2340393 | MOK       | 0.503805277 |
| ILMN_1747775 | STX2      | 0.503647646 |
| ILMN_1673352 | IFITM2    | 0.503529777 |
| ILMN_1733947 | FKBP8     | 0.503429627 |
| ILMN_1689160 | DPEP2     | 0.503404871 |
| ILMN_2278539 | WDR16     | 0.503375051 |
| ILMN_3252771 | RPL18A    | 0.503368818 |
| ILMN_2206746 | BGN       | 0.503337334 |
| ILMN_1709953 | DONSON    | 0.503309055 |
| ILMN_1679809 | GSTP1     | 0.503215153 |
| ILMN_1803476 | KCTD20    | 0.503060882 |
| ILMN_1708101 | LMNB2     | 0.502899384 |
| ILMN_1755733 | RPLP2     | 0.502522172 |
| ILMN_1750178 | FAM21C    | 0.50243158  |
| ILMN_2229922 | Cl2orf95  | 0.502429549 |
| ILMN_1797594 | NFAT5     | 0.50221788  |
| ILMN_1653708 | GORD1B    | 0.502125884 |
| ILMN_1810228 | TT2       | 0.502096816 |
| ILMN_2111932 | SERINC2   | 0.501939306 |
| ILMN_3233179 | H56T1     | 0.501730054 |
| ILMN_1743347 | AKT2      | 0.501490072 |
| ILMN_1797988 | KLRD1     | 0.501464206 |
| ILMN_1703949 | KPNB1     | 0.501233333 |
| ILMN_1779639 | IRAK1BP1  | 0.501247463 |
| ILMN_2144791 | GOLGA6A   | 0.501122041 |
| ILMN_1701877 | AXL       | 0.5010946   |
| ILMN_1678841 | UBD       | 0.501055834 |
| ILMN_1812559 | SLC7A6    | 0.501019635 |
| ILMN_2396427 | FL14      | 0.500866883 |
| ILMN_1696213 | RBM3      | 0.500859767 |

|              |              |               |
|--------------|--------------|---------------|
| ILMN_1910645 | NA           | -0.45610193   |
| ILMN_1772712 | UBE2J2       | -0.45612674   |
| ILMN_1889215 | BF434110     | -0.45619257   |
| ILMN_2408615 | URUC17       | -0.456199837  |
| ILMN_1738818 | RAG1         | -0.456251867  |
| ILMN_2145044 | FAM173B      | -0.456324445  |
| ILMN_1810400 | IDH3B        | -0.456331048  |
| ILMN_1672287 | MYN1         | -0.456381305  |
| ILMN_1764415 | ZNF385A      | -0.456381993  |
| ILMN_1792303 | SLOC2        | -0.456464087  |
| ILMN_1669747 | UNC13B       | -0.456720613  |
| ILMN_1762506 | LOC100506422 | -0.456812887  |
| ILMN_1787595 | B3GALNT1     | -0.456881398  |
| ILMN_1669410 | CHGA         | -0.457021844  |
| ILMN_1723418 | CEL          | -0.457055681  |
| ILMN_1761112 | PORCN        | -0.457174998  |
| ILMN_1735064 | PPP1R3E      | -0.457232952  |
| ILMN_1891927 | DCBLD1       | -0.457244118  |
| ILMN_2279844 | LCK          | -0.457266783  |
| ILMN_1723834 | KCNK         | -0.457341855  |
| ILMN_1683162 | COL1A1       | -0.457372581  |
| ILMN_1863858 | AT45159      | -0.457803412  |
| ILMN_1867214 | LOC400654    | -0.457937357  |
| ILMN_3241848 | MIR3647      | -0.45796134   |
| ILMN_2371825 | AGL          | -0.458113699  |
| ILMN_2156267 | E1F2AK1      | -0.458128986  |
| ILMN_1789519 | TMEM161C     | -0.458353233  |
| ILMN_1838655 | CR614R03     | -0.458430267  |
| ILMN_2272519 | FGR          | -0.458486532  |
| ILMN_1881408 | AL120241     | -0.458509247  |
| ILMN_3248193 | AT96012      | -0.458569306  |
| ILMN_1763472 | SUMF1        | -0.458592795  |
| ILMN_1807633 | HRSF12       | -0.458777564  |
| ILMN_1774708 | ORMDL2       | -0.458861726  |
| ILMN_3289779 | NA           | -0.458938543  |
| ILMN_1728074 | PHAX         | -0.459031257  |
| ILMN_1729402 | CHRM2        | -0.459037826  |
| ILMN_1692511 | TMEM106C     | -0.459056832  |
| ILMN_2412849 | SLC6A10      | -0.459067856  |
| ILMN_1777556 | SOAT2        | -0.459073562  |
| ILMN_3292042 | LOC284688    | -0.459104961  |
| ILMN_1766115 | PLEKH2       | -0.459236048  |
| ILMN_1904791 | AKO23763     | -0.459242528  |
| ILMN_1787705 | ATPV1B2      | -0.459272998  |
| ILMN_3246902 | ABCC9P1      | -0.459431962  |
| ILMN_3241987 | DGCR9        | -0.45944892   |
| ILMN_1789387 | KCNK3        | -0.459470537  |
| ILMN_1677919 | GMPR2        | -0.459578838  |
| ILMN_1678968 | GEM          | -0.459664064  |
| ILMN_1784833 | SEC8BP1L     | -0.459696435  |
| ILMN_3309114 | RTAP20-3     | -0.459813652  |
| ILMN_1735822 | TTCS0A       | -0.459830155  |
| ILMN_3246634 | SDHA         | -0.459917245  |
| ILMN_1653761 | MYCN         | -0.459918351  |
| ILMN_1766125 | H1FNT        | -0.460039553  |
| ILMN_2311000 | DNAC12       | -0.460061622  |
| ILMN_1731157 | MYO21        | -0.460062713  |
| ILMN_1781859 | UGT2B28      | -0.460070664  |
| ILMN_1775034 | MEIG1        | -0.460092104  |
| ILMN_1736162 | GC           | -0.460177403  |
| ILMN_232458  | OPA1         | -0.460227093  |
| ILMN_1707649 | NP02         | -0.460300208  |
| ILMN_1773174 | PDPK1        | -0.460313276  |
| ILMN_1799710 | CDC96        | -0.460329346  |
| ILMN_3308592 | MIR98        | -0.460441304  |
| ILMN_1673867 | LIMD2        | -0.460614452  |
| ILMN_1680794 | AGNT         | -0.460730483  |
| ILMN_1810738 | HPS5         | -0.460741971  |
| ILMN_2094905 | COMMD10      | -0.460767473  |
| ILMN_1784910 | ZSCAN21      | -0.460815507  |
| ILMN_3248747 | LOC647983    | -0.460815902  |
| ILMN_1826467 | BX107250     | -0.460921282  |
| ILMN_1746652 | UNC93A       | -0.461103159  |
| ILMN_1802161 | OR318885     | -0.461141829  |
| ILMN_1813664 | HIRA         | -0.461172351  |
| ILMN_1717295 | C6orf122     | -0.461203638  |
| ILMN_3187903 | ALS82488     | -0.461300264  |
| ILMN_1782204 | AFP          | -0.461371801  |
| ILMN_1765352 | TUB          | -0.461399675  |
| ILMN_1781381 | HK12658      | -0.461466509  |
| ILMN_1719032 | LSM3         | -0.461512404  |
| ILMN_1694514 | ZDHHC11      | -0.461519713  |
| ILMN_1877039 | BUBS8876     | -0.461581381  |
| ILMN_3247013 | EGOT         | -0.461854066  |
| ILMN_1692651 | PHB          | -0.461851891  |
| ILMN_2381697 | PMA2         | -0.461916276  |
| ILMN_2097943 | Clorf87      | -0.461957805  |
| ILMN_1809117 | MAD2L1BP     | -0.461977685  |
| ILMN_2178116 | MMP20        | -0.462015161  |
| ILMN_2171384 | CXCL5        | -0.462047193  |
| ILMN_1701565 | UPK3B        | -0.462133779  |
| ILMN_1751576 | TEK          | -0.46218456   |
| ILMN_1776283 | LGALS12      | -0.46221185   |
| ILMN_1798712 | USP4         | -0.462281091  |
| ILMN_1657455 | CEACAM4      | -0.462525625  |
| ILMN_1766678 | NKX2-6       | -0.462538832  |
| ILMN_321746  | NA           | -0.4625454963 |
| ILMN_1770080 | FAM159B      | -0.462570066  |



ILMN\_1658206 OSCP1 0.492431169  
ILMN\_2068104 TFRP2 0.492384832  
ILMN\_1735381 C16orf35 0.492072043  
ILMN\_2278729 EF3B 0.492037584  
ILMN\_2388447 ARID4A 0.491954335  
ILMN\_1693650 FES 0.49181402  
ILMN\_1693986 WHAMM1 0.491752407  
ILMN\_2363586 SOCBP 0.49173784  
ILMN\_1750508 VRK2 0.491640857  
ILMN\_2356578 TV 0.491374873  
ILMN\_1679929 KLF13 0.491253007  
ILMN\_1753716 EFB21 0.491217209  
ILMN\_1667551 SMAA4 0.491001738  
ILMN\_2113049 OQCT 0.490989386  
ILMN\_2059689 TMEM54 0.490749543  
ILMN\_2080973 ATP9A 0.490697833  
ILMN\_1694203 ZNF141 0.49066539  
ILMN\_2112673 POTEK 0.490634365  
ILMN\_1738347 RNPEP 0.49056004  
ILMN\_1670383 PCDH7 0.490551108  
ILMN\_1666444 RBMS1 0.490401754  
ILMN\_1739847 EFD30 0.490342055  
ILMN\_3200362 NBF1 0.490265002  
ILMN\_2359800 MS4A6A 0.490259581  
ILMN\_1898518 GFRA1 0.490161623  
ILMN\_2361807 OS9 0.490131931  
ILMN\_1684836 ANKRD12 0.490069987  
ILMN\_1787109 CLK2 0.490031476  
ILMN\_1705876 NAP1L1 0.489988946  
ILMN\_2333107 AES 0.489912392  
ILMN\_2324202 GABRE 0.489727064  
ILMN\_1666222 PHACTR3 0.489640078  
ILMN\_1659762 EBF3 0.489124501  
ILMN\_1772036 STEAP4 0.488940059  
ILMN\_1754842 DLGAP4 0.488782341  
ILMN\_1898124 C7orf40 0.488742778  
ILMN\_2370772 EFG4G1 0.488666468  
ILMN\_2391891 MAP2K5 0.488648588  
ILMN\_1698749 LAMA4 0.488437034  
ILMN\_3247018 EFA4A1 0.488240838  
ILMN\_1663799 RPL32 0.488173185  
ILMN\_1664177 ATXN7L2 0.48817078  
ILMN\_1655766 ANKRD34B 0.488128536  
ILMN\_2345908 DDX11 0.488091905  
ILMN\_2388990 MAPK14 0.487972142  
ILMN\_1782543 EEF1D 0.487893334  
ILMN\_2092756 TMEM109 0.487843306  
ILMN\_3205924 EFB3 0.487713197  
ILMN\_2219351 CENPO 0.487514536  
ILMN\_1718399 ANXA2 0.487218913  
ILMN\_1675857 COL4A6 0.487136195  
ILMN\_1697742 JF432672 0.486955817  
ILMN\_1815445 IDS 0.486891202  
ILMN\_2317751 REC8 0.486855074  
ILMN\_1855286 C6orf704 0.48672629  
ILMN\_3181411 AT1L 0.486647284  
ILMN\_3204210 RPL10 0.486490882  
ILMN\_1687546 HSP90A1 0.486392337  
ILMN\_2064606 TBC1D2B 0.486354685  
ILMN\_1715947 HNRNPA1 0.486339916  
ILMN\_1814971 TCF25 0.48620247  
ILMN\_1675709 ARFGAP1 0.486110135  
ILMN\_1792489 ARPC2 0.486051782  
ILMN\_1733799 FAM195B 0.486004186  
ILMN\_3234828 TMEM229B 0.485929642  
ILMN\_1710524 PARD3 0.485925348  
ILMN\_1808777 EHD2 0.485812889  
ILMN\_1748812 TMEM130 0.485665537  
ILMN\_3221790 RPL7L1 0.48563651  
ILMN\_1790782 MED16 0.485454101  
ILMN\_1730940 KLHD3 0.485368731  
ILMN\_2184640 NOLC1 0.485301222  
ILMN\_1660554 VWA1 0.485296262  
ILMN\_1670926 C15orf15 0.485232237  
ILMN\_1723486 HW2 0.485224916  
ILMN\_1760922 GIT2 0.485200091  
ILMN\_1728984 PA2G4 0.48510665  
ILMN\_2286514 GTPBP8 0.485083078  
ILMN\_2139943 RPS3A 0.484952685  
ILMN\_2367760 RPL10A 0.484899777  
ILMN\_1684983 OTUB2 0.484738814  
ILMN\_1703622 PPIB 0.484419851  
ILMN\_1676099 SPON2 0.484362427  
ILMN\_1699015 H3F3A 0.484233016  
ILMN\_1746604 ILG5T 0.484173925  
ILMN\_3238001 LOC349114 0.484064396  
ILMN\_2088172 POLR2B 0.483964985  
ILMN\_2398847 ARHGAP17 0.483899355  
ILMN\_1718558 PARP12 0.483813946  
ILMN\_1771593 RRM1 0.483716918  
ILMN\_1739618 ZNF408 0.483694837  
ILMN\_1745963 FOLR2 0.483684606  
ILMN\_1664706 HIST2HD3 0.483556889  
ILMN\_2141444 RPL18A 0.483539395  
ILMN\_1763386 BID 0.483336977  
ILMN\_1674386 PITX1 0.483209242  
ILMN\_1689371 GIMAP2 0.482977587  
ILMN\_2230863 CDC47L 0.482896904

ILMN\_1719163 ZNF557 -0.469745889  
ILMN\_1770005 PTPN18 -0.469813959  
ILMN\_1654689 ZNF197 -0.469814789  
ILMN\_2347097 KLF15 -0.469915103  
ILMN\_2388669 GRIA3 -0.469957587  
ILMN\_3235817 LOC100132941 -0.469959777  
ILMN\_1765460 AMIGO1 -0.470206894  
ILMN\_1916311 DB069547 -0.470213757  
ILMN\_3306028 BMS12296 -0.470350667  
ILMN\_2172398 ALDH5A1 -0.470359076  
ILMN\_1655626 KIAA1931 -0.470389733  
ILMN\_1691959 AKAP2 -0.470447712  
ILMN\_1796074 C18orf56 -0.470452022  
ILMN\_3244025 DUX2 -0.470690968  
ILMN\_2215570 WWP1 -0.470738825  
ILMN\_3385339 UBAS5 -0.470799455  
ILMN\_1739813 HYAL1 -0.470816403  
ILMN\_2163306 FAM120A -0.470834054  
ILMN\_1794844 THRSP -0.470841943  
ILMN\_1779501 MCSR -0.47084618  
ILMN\_1840311 DAB4B48 -0.470855677  
ILMN\_2314340 PAM6 -0.470956121  
ILMN\_1683133 KLF15 -0.47102753  
ILMN\_1727466 KCNMB4 -0.47105307  
ILMN\_3249439 ZNF878 -0.471099889  
ILMN\_1671619 HMO2 -0.471104661  
ILMN\_1753856 ZNF407 -0.471123163  
ILMN\_3180456 NA -0.471231526  
ILMN\_1782070 NPL -0.471299675  
ILMN\_1767649 PCDHGC3 -0.471299724  
ILMN\_1744647 CAND1 -0.471304907  
ILMN\_2123525 YCYP3 -0.47134986  
ILMN\_1726144 CDC27 -0.471522961  
ILMN\_1900457 NA -0.471595509  
ILMN\_1788156 EPM2A -0.471620005  
ILMN\_1795300 ARHGFE37 -0.471866565  
ILMN\_2230016 HIGD1A -0.471919625  
ILMN\_3249546 RASA4 -0.471949103  
ILMN\_2100357 SMPD3A -0.472121067  
ILMN\_1739275 HTR3C -0.472208005  
ILMN\_1709570 MMP1L -0.472288038  
ILMN\_1685079 TELO2 -0.472298581  
ILMN\_3250322 DPPA3 -0.472369947  
ILMN\_3242164 SNOORD59B -0.47239334  
ILMN\_2110713 CCNMB8 -0.47239376  
ILMN\_1803774 STK16 -0.47240134  
ILMN\_2156699 ACOT6 -0.472489087  
ILMN\_1711650 KCNE1L -0.472530513  
ILMN\_2124471 SLC36A1 -0.472643621  
ILMN\_1680925 SLC43A1 -0.472649398  
ILMN\_2296843 GCDH -0.472675867  
ILMN\_1712751 HADHA -0.472749042  
ILMN\_1671482 GALM -0.472862255  
ILMN\_2100815 TMEM9B -0.473093147  
ILMN\_1782881 DLEU7 -0.473114697  
ILMN\_3200283 CDC113 -0.473206426  
ILMN\_1768867 AP3B1 -0.473216348  
ILMN\_1813938 CHCHD4 -0.473283547  
ILMN\_1750901 GNAT1 -0.473343079  
ILMN\_1696537 DDT4L -0.473447746  
ILMN\_1672443 GDDR -0.473608872  
ILMN\_1809744 SAS4B12 -0.473721398  
ILMN\_1736218 CHRN3B -0.473819383  
ILMN\_1734897 SLC44A -0.473841751  
ILMN\_1660963 CCN -0.474004041  
ILMN\_1658083 ABT1 -0.474040114  
ILMN\_3251278 DPPA3 -0.474046263  
ILMN\_1704477 COX6A -0.474132301  
ILMN\_1812503 PHKA1 -0.47422592  
ILMN\_1806400 TYMS -0.47424293  
ILMN\_1706005 GALT -0.474279075  
ILMN\_3240451 VWDE -0.474322237  
ILMN\_2280068 MAPKAP1 -0.474373916  
ILMN\_1745851 LOC898976 -0.474523334  
ILMN\_1859393 AI023701 -0.474631805  
ILMN\_1775467 OR2T12 -0.474794437  
ILMN\_1809695 CAMK2G -0.474817302  
ILMN\_3308976 MIR135B -0.474903616  
ILMN\_1690783 TREM1L1 -0.474967789  
ILMN\_1665856 C10D -0.475005065  
ILMN\_1678170 MME -0.475022872  
ILMN\_1785371 MAPKBP2 -0.475056564  
ILMN\_1895518 AW468861 -0.47507391  
ILMN\_1663220 MRP122 -0.475133187  
ILMN\_1687569 CPT1A -0.475200341  
ILMN\_1741843 ROR3 -0.475235434  
ILMN\_1682034 HEY2 -0.475239162  
ILMN\_1806787 CSCD2 -0.475298893  
ILMN\_1740263 P2RX3 -0.475326862  
ILMN\_1731948 PCK1 -0.475439981  
ILMN\_1770260 NFRB2 -0.475454968  
ILMN\_2317739 TSN2 -0.475511129  
ILMN\_2400583 USP9K -0.475697757  
ILMN\_1699320 LOC339524 -0.475849926  
ILMN\_1706901 HOKD13 -0.475933025  
ILMN\_175742 RNF128 -0.475973354  
ILMN\_1762582 RNF1 -0.476030327  
ILMN\_3271630 FGGY -0.47609754

ILMN\_1798181 IRF7 0.482883978  
ILMN\_1758100 GALS3 0.482734247  
ILMN\_2399328 COBR1A1 0.48267825  
ILMN\_1745148 ZNFY1 0.48264352  
ILMN\_1783171 UBE2Z 0.482628862  
ILMN\_1742167 TUBA1C 0.482601782  
ILMN\_1719835 OSCP1 0.482467305  
ILMN\_1744109 OR2A42 0.482420344  
ILMN\_2081269 OR2A9P 0.482216933  
ILMN\_1808634 DRAM12 0.482211079  
ILMN\_1663390 CDC20 0.482209597  
ILMN\_2057573 ESYT2 0.482076289  
ILMN\_1763260 HIF1A 0.482050535  
ILMN\_1666257 XCL1 0.48197394  
ILMN\_1685202 KRBPA2 0.481951013  
ILMN\_1733157 GRAMD1A 0.48188054  
ILMN\_1702044 CNTROB 0.481766901  
ILMN\_3185223 NA 0.481727021  
ILMN\_3230572 NCRNA00152 0.481508806  
ILMN\_1687501 MXXO1 0.481339123  
ILMN\_2041101 ANKRP2 0.481277998  
ILMN\_1855278 AW554199 0.481263936  
ILMN\_1738523 MYD88 0.481210536  
ILMN\_1779234 CKCL6 0.481203102  
ILMN\_1720287 E4F1 0.481191621  
ILMN\_3250321 PTF4A3 0.481181193  
ILMN\_1651808 MEF2A 0.481131349  
ILMN\_1716488 PACS1 0.48101636  
ILMN\_1728677 CREB5 0.480994618  
ILMN\_2127605 LRP3 0.480942874  
ILMN\_1793950 POTE4 0.480843437  
ILMN\_1705737 IMPDH2 0.480830044  
ILMN\_1695341 KCNK10 0.480803968  
ILMN\_1793990 IQ2 0.480587867  
ILMN\_2059505 ARPP19 0.480479573  
ILMN\_3307926 ADRBK1 0.480454474  
ILMN\_2053178 ACTG1 0.480437449  
ILMN\_1689953 CDB1 0.480334589  
ILMN\_1723820 KDEL3 0.480313251  
ILMN\_1737314 BCLE 0.480285393  
ILMN\_3180989 DSTYK 0.48027329  
ILMN\_1667295 VASN 0.480182817  
ILMN\_1785831 ZDHHC13 0.480154459  
ILMN\_1807972 MICAL1 0.480054752  
ILMN\_2403978 STA73 0.480022138  
ILMN\_1753862 SRP54 0.479991104  
ILMN\_3244666 FLJ00326 0.479938802  
ILMN\_2397294 PLCB4 0.479459389  
ILMN\_2389496 COA53 0.479425844  
ILMN\_177316 FANK1 0.47939042  
ILMN\_3240360 RPS18 0.479382421  
ILMN\_1770206 GEMIN4 0.479069377  
ILMN\_1658399 KLRG1 0.479056045  
ILMN\_1723895 GTF3C5 0.479027686  
ILMN\_3195001 CCL15 0.478991336  
ILMN\_2301624 MACE1 0.478981637  
ILMN\_1679039 CASKN1 0.478953822  
ILMN\_1674036 BIRC7 0.478915805  
ILMN\_1737918 C1QA 0.478730542  
ILMN\_2169152 SRGN 0.478598646  
ILMN\_1877259 BX099468 0.478513883  
ILMN\_1652397 FOPD2A 0.478457504  
ILMN\_3252556 CARD18 0.478457455  
ILMN\_2402272 TCEA18 0.478244957  
ILMN\_1755758 RIF1 0.478211724  
ILMN\_1720083 EHD4 0.478167319  
ILMN\_1708866 SUPTSH 0.478106941  
ILMN\_2407482 TIPA 0.478085581  
ILMN\_2292178 CLEC12A 0.477959658  
ILMN\_2199409 EFHB 0.477925873  
ILMN\_1776678 GIMAP7 0.477667448  
ILMN\_3241979 TMEM1798 0.477664085  
ILMN\_2060413 CD24 0.477635065  
ILMN\_1741558 PON2 0.477572737  
ILMN\_3245236 FBRS 0.47737823  
ILMN\_1658182 MEX3C 0.477301928  
ILMN\_1775111 SND1 0.477288295  
ILMN\_1773389 PLTP 0.477275193  
ILMN\_1661337 SRM 0.477221112  
ILMN\_2341979 SNORD452 0.477215449  
ILMN\_1715639 FLJ00310 0.477045295  
ILMN\_1753608 TMEM131 0.477040388  
ILMN\_1728236 SLC112 0.476983805  
ILMN\_2141452 RPL18A 0.47681638  
ILMN\_2312719 ENDOG3 0.476703689  
ILMN\_3246962 SRECC1L 0.476688213  
ILMN\_1811574 MAPK8IP3 0.476622907  
ILMN\_1767256 MBTPS1 0.476620386  
ILMN\_1691535 CUL4B 0.476564104  
ILMN\_2377733 CASP8 0.476382638  
ILMN\_1784320 ELMO1 0.476323106  
ILMN\_1806705 ASB6 0.476217045  
ILMN\_1781151 ARMC8 0.476086072  
ILMN\_1721977 NAA10 0.476033805  
ILMN\_2280568 ANKRD36 0.475894393  
ILMN\_1804476 GMPYA 0.475774645  
ILMN\_1761772 NUP155 0.475757137  
ILMN\_1652407 ZMYND8 0.475741927

ILMN\_1778890 LRR1 -0.476143591  
ILMN\_1735453 FAM98A -0.476182077  
ILMN\_1664118 CADM2 -0.476239069  
ILMN\_1694650 RIK1 -0.476329071  
ILMN\_1798187 MYST2 -0.476558638  
ILMN\_2248632 PCDH10 -0.47666392  
ILMN\_1705266 RELA -0.476994016  
ILMN\_1716729 AKI29567 -0.476998472  
ILMN\_2385672 ILN -0.477058648  
ILMN\_1739872 ADAMTS18 -0.477132074  
ILMN\_1708508 PPM1E -0.477352438  
ILMN\_3305273 PSAT1 -0.477380166  
ILMN\_1746618 PAQR7 -0.477530732  
ILMN\_1718932 MTRR -0.477565956  
ILMN\_1808677 RCI41517 -0.477711127  
ILMN\_1659010 AK124016 -0.477837317  
ILMN\_1782412 IRX2 -0.477858541  
ILMN\_1891277 NA -0.477869221  
ILMN\_1683687 AKO24951 -0.477876888  
ILMN\_1757081 SYN2 -0.477893042  
ILMN\_1803852 CSAG2 -0.477938264  
ILMN\_1699852 CES6A -0.477943227  
ILMN\_1791030 NEUROG1 -0.477998554  
ILMN\_1672445 BC040831 -0.478001571  
ILMN\_1774901 GPPD3 -0.478040603  
ILMN\_1911500 DA655367 -0.478275537  
ILMN\_3144462 RRM9P3 -0.478442297  
ILMN\_3242011 MDMK1B -0.478573949  
ILMN\_1884220 AWS13776 -0.478684565  
ILMN\_1785252 SLC26A6 -0.478697423  
ILMN\_2115073 DR1D5 -0.47882952  
ILMN\_1664102 EY3 -0.47896282  
ILMN\_1795918 C6orf36 -0.48099691  
ILMN\_1791951 KRTAP13-2 -0.479040143  
ILMN\_2404085 CLIP1 -0.479070379  
ILMN\_1665824 C6orf218 -0.479120585  
ILMN\_2399463 VAV3 -0.479227385  
ILMN\_3244860 LIRC16B -0.479264591  
ILMN\_2133996 SHE -0.479363904  
ILMN\_2230566 RAB40B -0.479397257  
ILMN\_1778617 TAF9 -0.479546418  
ILMN\_1795467 LOC399715 -0.479604734  
ILMN\_1755843 SLC26A8 -0.479648412  
ILMN\_1718657 FLJ48990 -0.479734113  
ILMN\_3722216 ABNGA932 -0.479818092  
ILMN\_1697704 KRTAP12-2 -0.479839512  
ILMN\_1788729 TCF23 -0.479971888  
ILMN\_1685917 EMCN -0.479982456  
ILMN\_1897741 CR610863 -0.480046609  
ILMN\_3240187 C6orf91 -0.480100871  
ILMN\_2193498 TM7TL1 -0.480294884  
ILMN\_1734660 ICAM4 -0.480390249  
ILMN\_2123550 OR8B12 -0.480647463  
ILMN\_1805127 CCDC2 -0.480743694  
ILMN\_1679979 PLK3 -0.480867472  
ILMN\_1651681 BC013377 -0.48096803  
ILMN\_1712999 MGAM -0.481004616  
ILMN\_1785345 GPR84 -0.481087298  
ILMN\_1770927 KAZN -0.481148785  
ILMN\_1673605 PRSS57 -0.481289027  
ILMN\_3235143 LOC731779 -0.48132659  
ILMN\_3191541 PTPRN -0.481500919  
ILMN\_1718060 OTUD7A -0.481642657  
ILMN\_3252862 DKFZ667F0711 -0.481716443  
ILMN\_1856998 BC053535 -0.481758379  
ILMN\_2349982 FGF1 -0.481894847  
ILMN\_1861128 AW237129 -0.481917802  
ILMN\_1801443 TSM -0.48197255  
ILMN\_1767643 CTRB2 -0.482121464  
ILMN\_1723414 HAGL1 -0.482204169  
ILMN\_2393341 LIAS -0.482229813  
ILMN\_3306482 GCSH -0.482374629  
ILMN\_1793930 CRL7 -0.482400361  
ILMN\_1817151 CXC01807 -0.482493321  
ILMN\_3293146 C2orf93 -0.482566137  
ILMN\_1701386 STRADB -0.482573638  
ILMN\_2225511 BRMS1L -0.482608079  
ILMN\_1821199 CR744726 -0.482629491  
ILMN\_1683996 CLIC5 -0.48275962  
ILMN\_2393456 DDO -0.482759669  
ILMN\_1673752 C1orf91 -0.482941319  
ILMN\_1745688 HPD -0.483020718  
ILMN\_3293159 BC015443 -0.48306216  
ILMN\_1745043 LDHC -0.483174088  
ILMN\_1783443 ALDH5 -0.483209556  
ILMN\_1694780 GCHFR -0.483223923  
ILMN\_1803094 PDGFD -0.483289944  
ILMN\_2066151 TEK -0.483338071  
ILMN\_1658499 SYT13 -0.483382217  
ILMN\_1724162 ARX -0.483418842  
ILMN\_1681855 TRCD25 -0.483434937  
ILMN\_1689001 CDK4 -0.483454866  
ILMN\_2079285 ATP5L -0.483501275  
ILMN\_1694078 AY588310 -0.483513776  
ILMN\_1740233 UGT1A1 -0.483568453  
ILMN\_1913413 BX105847 -0.483629896  
ILMN\_1803844 PPA4E12 -0.483674198  
ILMN\_1843101 AA86159 -0.4837002

ILMN\_1720048 CCL2 0.47569866  
ILMN\_1652525 FAM125B 0.475673227  
ILMN\_1652412 PRR8 0.475580457  
ILMN\_1740789 HST11D 0.475330558  
ILMN\_2415011 DCTD 0.475309398  
ILMN\_1658955 EIF4E 0.475309133  
ILMN\_1655572 C6orf159 0.475289642  
ILMN\_3203186 ALS43610 0.475249303  
ILMN\_1683204 GMEB2 0.474844701  
ILMN\_1721967 CR2A7 0.474693143  
ILMN\_2149556 VPS25 0.474690159  
ILMN\_1873838 IGKC 0.474645264  
ILMN\_2383435 PSMOD10 0.474522463  
ILMN\_1789733 CLIP3 0.4744472305  
ILMN\_1688663 ZDHHC13 0.474451655  
ILMN\_1780987 RFXANK 0.474450388  
ILMN\_3238555 FKSG29 0.474365393  
ILMN\_1654560 TLR1 0.474308115  
ILMN\_2333440 TMS5F1 0.474181545  
ILMN\_1657435 MT1M 0.474087628  
ILMN\_1690268 HNRNPULL1 0.474017095  
ILMN\_1664823 TAOX3 0.473980023  
ILMN\_1794707 ATHL1 0.473922333  
ILMN\_3237826 CNTNAP3B 0.473907243  
ILMN\_1793371 KIAA0430 0.473876984  
ILMN\_1699348 MS4A4E 0.473762017  
ILMN\_1655705 STARD3 0.473745325  
ILMN\_1772189 ABCD1 0.473731207  
ILMN\_1775999 ATAT1 0.473722024  
ILMN\_1805161 LZTR1 0.473709257  
ILMN\_1769245 GLP1R1 0.473698778  
ILMN\_1659936 PPP1R15A 0.473493007  
ILMN\_1801939 CND2 0.473395166  
ILMN\_1750003 SNX12 0.473345944  
ILMN\_1805812 TOR1A 0.473296555  
ILMN\_1727642 MOGS 0.47329253  
ILMN\_1796085 PPM1B 0.473210471  
ILMN\_1788202 SOCCA8 0.473200571  
ILMN\_1779010 MAFK43 0.473112094  
ILMN\_1794740 CD151 0.473072831  
ILMN\_1692473 PRMT1 0.47304883  
ILMN\_1737394 LMNA 0.473033224  
ILMN\_1720476 PHE2 0.473003079  
ILMN\_1700228 C5orf156 0.472899917  
ILMN\_1815130 MICALL1 0.472796437  
ILMN\_3239397 NA 0.472767779  
ILMN\_2103107 ADAMDEC1 0.472759097  
ILMN\_1659843 DNAJC3 0.472683521  
ILMN\_1769201 ELF3 0.472616649  
ILMN\_1779490 C17orf53 0.472524573  
ILMN\_3197998 RPLD 0.47251705  
ILMN\_1698139 TCEA1 0.472514223  
ILMN\_1736814 CLNS1A 0.472481425  
ILMN\_1686981 SULF2 0.472459163  
ILMN\_1699009 FOL2 0.472404388  
ILMN\_1761138 C5orf142 0.472404039  
ILMN\_1755235 YPO6 0.47233406  
ILMN\_1815519 EPN2 0.47221135  
ILMN\_1653292 PFKB4 0.472132939  
ILMN\_2147078 PIWIL4 0.471950849  
ILMN\_1808860 STX5 0.471910167  
ILMN\_1666050 TRUB1 0.471732573  
ILMN\_1774779 EMB 0.471629371  
ILMN\_1697559 G6PD 0.471511836  
ILMN\_1795236 SIGLEC9 0.471499151  
ILMN\_3211187 TUBB2A 0.471456099  
ILMN\_1811137 DRZ2p667P09910 0.471405236  
ILMN\_1659905 FKBP10 0.471280524  
ILMN\_2376289 DBNL 0.471276698  
ILMN\_1724066 PLCB2 0.471130711  
ILMN\_1682928 CPVL 0.471076607  
ILMN\_1814789 UBAP2L 0.471064613  
ILMN\_2155228 CR1F3 0.471058137  
ILMN\_1667986 FAM129A 0.470975211  
ILMN\_2382906 PLCG1 0.470743885  
ILMN\_2414325 TNFAIP8 0.470670993  
ILMN\_3274666 CR6D1848 0.4706621  
ILMN\_1811921 CSRP1 0.470652294  
ILMN\_1805448 EPB412 0.470640447  
ILMN\_1774602 FBLN2 0.470596384  
ILMN\_2322446 PABPC112B 0.470584651  
ILMN\_2379599 CD163 0.470498642  
ILMN\_1802376 FAM48A 0.470219254  
ILMN\_1661917 RPLD 0.470204378  
ILMN\_1781729 CLC1L1 0.470130364  
ILMN\_1862018 ATXN7L3 0.470108933  
ILMN\_1668185 ZNF282 0.470026401  
ILMN\_1698653 ODF2 0.469932959  
ILMN\_1717934 SYT11 0.469927444  
ILMN\_2372974 SRPA 0.469922456  
ILMN\_2415776 WWOX 0.469915973  
ILMN\_1772486 ELF2 0.469829868  
ILMN\_3304012 NA 0.469812549  
ILMN\_1790460 ZNF574 0.469744684  
ILMN\_1778255 FARSA 0.469439492  
ILMN\_3310436 MIRS67 0.469398817  
ILMN\_3229324 SG1 0.469355562  
ILMN\_2156440 TUBA3D 0.469275408

ILMN\_1749641 FBXO3 -0.48370793  
ILMN\_1806434 PAQR5 -0.483756088  
ILMN\_1806473 BEK5 -0.483826227  
ILMN\_2144631 STEAP1 -0.483909151  
ILMN\_1814790 SHANK2 -0.483942768  
ILMN\_1711289 GYS1 -0.484240752  
ILMN\_1651636 CYP2A13 -0.484350478  
ILMN\_1767503 GABRB3 -0.484415091  
ILMN\_2380999 RECOL -0.484533999  
ILMN\_2384629 KCS1L2 -0.484490158  
ILMN\_1769547 DIO1 -0.484873245  
ILMN\_1699384 PPP2R5D -0.484944671  
ILMN\_1781060 SYN2 -0.485047939  
ILMN\_3209156 LOC100131372 -0.485090498  
ILMN\_1855996 AHR5753 -0.485126739  
ILMN\_1770509 TME167 -0.48524443  
ILMN\_1706690 KHK -0.485374178  
ILMN\_1728107 GNG7 -0.48608627  
ILMN\_1708382 C3orf75 -0.486255566  
ILMN\_1903047 AI701700 -0.486439212  
ILMN\_1712269 GPR -0.486552973  
ILMN\_1877939 BK109006 -0.486695141  
ILMN\_1788778 sept11 -0.486757637  
ILMN\_2338038 AK4 -0.486793132  
ILMN\_2094587 USP8 -0.486834593  
ILMN\_1788721 RABGAP1L -0.486957896  
ILMN\_2183687 UMR1 -0.487017192  
ILMN\_2103003 ORAN3P -0.487116783  
ILMN\_1688663 IFNA1 -0.487198793  
ILMN\_3292690 NA -0.487245737  
ILMN\_2388517 MTERFD3 -0.487249164  
ILMN\_1907451 BC038752 -0.487257821  
ILMN\_3217569 PHAK -0.487355527  
ILMN\_1761131 EC2 -0.487374134  
ILMN\_1801223 WTIP -0.487385895  
ILMN\_2327276 STAU1 -0.487547336  
ILMN\_1715991 SDPR -0.487560836  
ILMN\_1792671 C12orf29 -0.487714467  
ILMN\_2146661 FAIM1 -0.487787692  
ILMN\_1727309 FAM82A2 -0.487817035  
ILMN\_2192034 NA -0.48783753  
ILMN\_3234570 CECRA -0.487842607  
ILMN\_1687711 ZNF576 -0.487846247  
ILMN\_1766851 TME1268 -0.487869697  
ILMN\_1790603 ATAF1 -0.487948651  
ILMN\_1729095 PDZD2 -0.487958154  
ILMN\_1870747 BX116001 -0.487998165  
ILMN\_2151056 C10orf32 -0.488297265  
ILMN\_2128489 UQCRCB -0.48844072  
ILMN\_1698382 TAP1 -0.488420355  
ILMN\_1794951 SLC38A5 -0.488464571  
ILMN\_1685636 KCNN2 -0.488675995  
ILMN\_1733419 CCNE1 -0.488757466  
ILMN\_1815203 HMGCS2 -0.488901136  
ILMN\_1796560 DR11L1 -0.488902741  
ILMN\_1751060 RAB23 -0.488999744  
ILMN\_2229170 MED7 -0.489038428  
ILMN\_2203147 TMRPS12 -0.489078475  
ILMN\_3225432 LAMTOR3 -0.489488112  
ILMN\_1717357 AIFM1 -0.489503455  
ILMN\_1715116 ATP9V1A -0.489546503  
ILMN\_1661799 HMGJ1A -0.489738091  
ILMN\_1772677 CNOT4 -0.489932327  
ILMN\_1792931 LYSMD1 -0.489965956  
ILMN\_2207988 SERPIN1 -0.490085426  
ILMN\_1660635 LACTB2 -0.490135051  
ILMN\_2207720 TTM2B -0.490154111  
ILMN\_1723287 SLC4A16 -0.490278746  
ILMN\_1740265 ACOT7 -0.4902972  
ILMN\_1724504 SETD3 -0.490368341  
ILMN\_1798254 ACTR10 -0.490465505  
ILMN\_1681670 SLC25A4 -0.490549749  
ILMN\_1671791 PCK2 -0.490731145  
ILMN\_1795649 SRGBP2 -0.490847514  
ILMN\_1869343 D19756 -0.490914989  
ILMN\_2166865 ENY2 -0.491075085  
ILMN\_3232128 FLJ37786 -0.491257499  
ILMN\_1718853 UQCRC2 -0.491322489  
ILMN\_1757807 AGY2L2L -0.491382787  
ILMN\_2184945 KIAA1191 -0.491400757  
ILMN\_1702960 LOC644100 -0.491571559  
ILMN\_1660793 PAQR4 -0.491646326  
ILMN\_1763539 IER3P1 -0.491725172  
ILMN\_1912130 AKO97103 -0.491859958  
ILMN\_1861659 BOC3871 -0.491871672  
ILMN\_1776574 SACCD1 -0.491953697  
ILMN\_1675916 NA -0.492006535  
ILMN\_1720998 CA12 -0.492209124  
ILMN\_3234456 TSTD1 -0.492304589  
ILMN\_1750861 PML -0.492368621  
ILMN\_1748819 MRP123 -0.492456462  
ILMN\_1860963 BM4715829 -0.492471154  
ILMN\_2188722 GLS -0.492562587  
ILMN\_2104106 XPR1 -0.49257819  
ILMN\_1916462 DB157938 -0.492589678  
ILMN\_1784607 UGT1A1 -0.49266701  
ILMN\_1670666 GABRG1 -0.492813811  
ILMN\_2136635 ICA2 -0.492859516



ILMN\_1655625 GPATCH1 0.469144675  
ILMN\_2303166 MBNL3 0.469120518  
ILMN\_1727051 DDX19A 0.469081882  
ILMN\_2064655 C1orf102A 0.469049289  
ILMN\_1712605 ZNF829 0.469043086  
ILMN\_1782621 RPS12 0.469016198  
ILMN\_1686725 DICER1 0.468915003  
ILMN\_1665335 DIABLO 0.468901134  
ILMN\_2342753 NBPFF1 0.468897823  
ILMN\_2116714 SLC29A1 0.468834657  
ILMN\_3272374 NA 0.4686837205  
ILMN\_1797005 PGL5 0.468603855  
ILMN\_3237946 PXDN 0.468548423  
ILMN\_1704941 PPCDC 0.468499957  
ILMN\_1675992 DST 0.468445452  
ILMN\_1655357 ZNF24 0.468424404  
ILMN\_1748093 PAFAN1B3 0.468231375  
ILMN\_1770454 AGRN 0.468219425  
ILMN\_2070052 NPIP13 0.468136559  
ILMN\_1800354 CST3 0.468093502  
ILMN\_1816584 ILIR1 0.468057087  
ILMN\_3246625 KIAA1045 0.467820614  
ILMN\_1653797 C1orf162 0.467806575  
ILMN\_1699887 ST14 0.467800717  
ILMN\_2160005 NUMA1 0.467797672  
ILMN\_1802096 ARBT1 0.467675146  
ILMN\_1765557 CLFAM2B 0.467464027  
ILMN\_2268068 TCF20 0.467246755  
ILMN\_2148459 B2M 0.467174478  
ILMN\_1683179 RRAD 0.467171183  
ILMN\_1679693 TMEM87B 0.466961295  
ILMN\_3305397 RPS7 0.466740928  
ILMN\_2321578 PORY10 0.466713155  
ILMN\_3304435 LOC728640 0.46660385  
ILMN\_2173004 RAB8B 0.466551746  
ILMN\_1673638 RPS3A 0.466487099  
ILMN\_1798081 PTPRF 0.466429549  
ILMN\_2176755 KIAA0895L 0.466344225  
ILMN\_1789775 WDR74 0.466253455  
ILMN\_1691476 MYLK 0.466182657  
ILMN\_1787360 GUCA1C 0.466167796  
ILMN\_1758337 ZNF213 0.465941854  
ILMN\_1709333 OAS2 0.4658861948  
ILMN\_1088697 FMOX3B 0.465840547  
ILMN\_1704753 EPAS1 0.465822159  
ILMN\_1729269 LOC285074 0.46580848  
ILMN\_2316806 RWD01 0.465781296  
ILMN\_2306189 MGED1 0.465693892  
ILMN\_1756146 WDR45 0.465635123  
ILMN\_1718287 SLC10A3 0.465608892  
ILMN\_2407959 CPVL 0.465500641  
ILMN\_1716687 TPM1 0.465481182  
ILMN\_2371280 CSF3R 0.46544771  
ILMN\_3290380 XRCC6 0.465432484  
ILMN\_2218727 RPS2 0.465425542  
ILMN\_1700031 PRAME 0.465411866  
ILMN\_2046856 RPS15 0.465330027  
ILMN\_1742230 BAZ1A 0.465236618  
ILMN\_2139970 ALDH1A3 0.465236372  
ILMN\_1793474 INSG1 0.465195484  
ILMN\_2316104 IGLB1 0.465150108  
ILMN\_1686388 TPM3 0.465078097  
ILMN\_1716056 LMF2 0.465076951  
ILMN\_1804789 KIAA1967 0.46505663  
ILMN\_2408039 EEF1D 0.464950098  
ILMN\_1813836 DARS 0.46487948  
ILMN\_1708041 PLEKHF1 0.464836165  
ILMN\_1675156 CDC42 0.464794422  
ILMN\_1745686 MFHAS1 0.464770528  
ILMN\_2192620 DCAF15 0.464723076  
ILMN\_1807372 ADRRA2A 0.464708124  
ILMN\_1781897 KLR3 0.464495649  
ILMN\_2050212 RPSA 0.464446664  
ILMN\_2260313 CRYBA2 0.464422106  
ILMN\_1652918 RHOF 0.464363996  
ILMN\_2247133 NBPFF1 0.464317858  
ILMN\_2200562 LOC595101 0.464314215  
ILMN\_1714600 NAV3 0.464293779  
ILMN\_1680424 CTSG 0.464280754  
ILMN\_1670305 SERPINC1 0.464258891  
ILMN\_1678329 TNRC18 0.464175058  
ILMN\_1681542 HIST1H4E 0.464173644  
ILMN\_1770768 SLAMF1 0.464141744  
ILMN\_1762861 HLA-F 0.463969388  
ILMN\_1697417 GPF10 0.463976879  
ILMN\_1806415 TLL1 0.463759662  
ILMN\_1675038 PRMT2 0.463745057  
ILMN\_1713369 RPL13A 0.463686279  
ILMN\_1695261 RPL10 0.463595221  
ILMN\_1791726 TUBB3 0.463581398  
ILMN\_1763091 C16orf43 0.463553476  
ILMN\_2374340 PLAU8 0.463560037  
ILMN\_2109536 GOLGA8F 0.463439078  
ILMN\_1815287 B3GALNT1 0.463412432  
ILMN\_1785424 ABUM1 0.463346601  
ILMN\_2151817 PPN1 0.4633196782  
ILMN\_1683450 CDC45 0.463315182  
ILMN\_1742238 SET 0.463107946

ILMN\_1676055 AKO55272 -0.492974498  
ILMN\_1782045 FKBP4 -0.492985678  
ILMN\_3190834 ELMOD3 -0.493179106  
ILMN\_1737025 PCL12 -0.493232354  
ILMN\_3283869 FRC1B -0.493275132  
ILMN\_1888558 AI378936 -0.493447734  
ILMN\_1874814 AB231761 -0.493635358  
ILMN\_1838137 BFI14549 -0.493808722  
ILMN\_1793269 TNKS2 -0.493819221  
ILMN\_1887357 AKO93715 -0.493928979  
ILMN\_1813270 ELF5 -0.493968336  
ILMN\_3238269 NDUFA6 -0.493981829  
ILMN\_1769449 MBLAC2 -0.494002745  
ILMN\_1688864 CABP4 -0.494077863  
ILMN\_1688218 HADGRRA -0.494396411  
ILMN\_1735360 SDOA1 -0.494422322  
ILMN\_3307772 PACGIN2 -0.494876967  
ILMN\_1676660 DNAH6 -0.494924682  
ILMN\_3275685 LOC727721 -0.494945733  
ILMN\_1765550 NUPG2CL -0.495221428  
ILMN\_1691175 ADH6 -0.495298184  
ILMN\_1664993 SLX1B-SULT1A4 -0.495383092  
ILMN\_1811363 NOVA1 -0.495409995  
ILMN\_1754600 FNBP1L -0.495567838  
ILMN\_1697405 PCL11 -0.496010931  
ILMN\_2297887 SEZL2 -0.496039104  
ILMN\_1664216 NWRAS1 -0.496117903  
ILMN\_1765607 SLCEA2 -0.496142383  
ILMN\_1729476 PROL1 -0.496148391  
ILMN\_3309724 MIR509-2 -0.496168751  
ILMN\_1876729 LOC340544 -0.496320973  
ILMN\_1694983 DDX20 -0.496411095  
ILMN\_1815935 TRPM4 -0.496498983  
ILMN\_1785302 REG1P -0.496607767  
ILMN\_1759488 DUSP10 -0.496638981  
ILMN\_1888492 AA083069 -0.496733356  
ILMN\_1660732 PPP2R2B -0.496785533  
ILMN\_2286800 DNML1 -0.496809182  
ILMN\_1753258 NDUFA4 -0.496949865  
ILMN\_1813055 LOC401093 -0.497180227  
ILMN\_2224333 C1orf65 -0.497271084  
ILMN\_3244070 URG7 -0.497285365  
ILMN\_2223010 VBP1 -0.497369206  
ILMN\_1784269 AAGSNH -0.49754422  
ILMN\_1744534 LYRM5 -0.497584628  
ILMN\_1826521 BX106259 -0.498141706  
ILMN\_1740528 ASB15 -0.498155645  
ILMN\_1815319 CMTM4 -0.498404435  
ILMN\_1796165 GLRX5 -0.498431744  
ILMN\_1715125 HAO2 -0.498441129  
ILMN\_1813400 CBR4 -0.498774656  
ILMN\_1807101 F11 -0.499111097  
ILMN\_1742968 NMNAT2 -0.499114137  
ILMN\_3229770 SKP1 -0.499172579  
ILMN\_1698083 TNMD2 -0.499195538  
ILMN\_1674648 LOC33588 -0.499318444  
ILMN\_3310845 MIR511-2 -0.499357279  
ILMN\_3235196 LOC100129716 -0.49938515  
ILMN\_1912737 HIPK2 -0.499485158  
ILMN\_1784818 OPN5 -0.499630574  
ILMN\_1677292 C5orf30 -0.499931875  
ILMN\_2374603 ALDH5A1 -0.500078572  
ILMN\_1839190 BC073918 -0.500264227  
ILMN\_2195721 KRTAP21-1 -0.500316763  
ILMN\_3308903 WFDC3 -0.500615848  
ILMN\_1804662 NRG4 -0.500705838  
ILMN\_1679782 BLOC1S2 -0.500749121  
ILMN\_1775171 WIPF2 -0.500801564  
ILMN\_1729509 C1orf43 -0.500852604  
ILMN\_2202790 MCFD2 -0.500896404  
ILMN\_1698733 CNH2 -0.500941487  
ILMN\_1871361 AX747287 -0.500994903  
ILMN\_1683886 BX444633 -0.50109908  
ILMN\_1732860 F1J26850 -0.501168237  
ILMN\_1897996 BC073461 -0.501478572  
ILMN\_2389064 C1orf48 -0.501568281  
ILMN\_3235833 NA -0.501604922  
ILMN\_1756723 DPP7 -0.501613329  
ILMN\_1732096 TRIM77P -0.501769092  
ILMN\_1855013 CN2P1296 -0.501857258  
ILMN\_1685696 C1orf55 -0.501935688  
ILMN\_1660043 UBKN11 -0.502028561  
ILMN\_1889633 BC071821 -0.502047034  
ILMN\_1697557 NA -0.502224799  
ILMN\_1771268 BICD2 -0.502231328  
ILMN\_1809352 PRL -0.502231052  
ILMN\_1750885 LOC644100 -0.502394996  
ILMN\_1766159 MIER2 -0.502417724  
ILMN\_1793367 LOC729966 -0.502501192  
ILMN\_1762531 FGF9 -0.502606578  
ILMN\_2312460 KCNMB2 -0.502616119  
ILMN\_1771223 PADI2 -0.502783108  
ILMN\_2282019 SYN3 -0.502919807  
ILMN\_1765072 KRT85 -0.502984036  
ILMN\_3234936 EYS -0.50320019  
ILMN\_1744517 GNS -0.503333484  
ILMN\_1701507 FHAM9 -0.503481158  
ILMN\_3239679 SNORD115-15 -0.503525132

ILMN\_1740487 CMTM7 0.463103295  
ILMN\_3310431 MIR874 0.463060114  
ILMN\_2365307 CD276 0.463036686  
ILMN\_1795514 C1orf15 0.463019193  
ILMN\_2347541 NN 0.462988546  
ILMN\_1717639 SK1 0.462973541  
ILMN\_1676792 RPS11 0.462909236  
ILMN\_1652185 IL4R 0.46284459  
ILMN\_2300695 IKZF3 0.46270802  
ILMN\_1711853 MED24 0.462521232  
ILMN\_2070375 GPR82 0.462444562  
ILMN\_3291998 RPL29 0.462409968  
ILMN\_2041222 FLJ40504 0.462320346  
ILMN\_1732672 IPAAT-delta 0.46230701  
ILMN\_1685808 RPL36 0.462248198  
ILMN\_3239181 ITRIP 0.462130732  
ILMN\_1805922 EBP1 0.461995803  
ILMN\_1812327 RNF19A 0.461991854  
ILMN\_2190414 ZNF83 0.461907396  
ILMN\_1805623 SRCIN1 0.461773721  
ILMN\_1669117 FARP9 0.46176588  
ILMN\_3278995 RBM39 0.461727074  
ILMN\_1701613 RARRS53 0.461719307  
ILMN\_1763884 CORO7 0.461707778  
ILMN\_1703412 LATS2 0.461635433  
ILMN\_1732328 RPL22 0.461631877  
ILMN\_2252309 DDPF1 0.461591241  
ILMN\_1676130 NFIC 0.461476352  
ILMN\_3241462 RPS18 0.4614550247  
ILMN\_3225761 RPS14 0.461444636  
ILMN\_3244065 C9orf69 0.461430772  
ILMN\_1815656 SERINC3 0.461318565  
ILMN\_1717234 CAST 0.461316582  
ILMN\_2056687 IGF1 0.461277177  
ILMN\_3220792 RPL13A5 0.461258531  
ILMN\_2343775 RPL38 0.461232084  
ILMN\_2334210 ITGB4 0.461227232  
ILMN\_1742808 SF1 0.461191904  
ILMN\_2315979 LHM 0.461107524  
ILMN\_1761912 MGAT1 0.461097801  
ILMN\_2350183 ST5 0.461043011  
ILMN\_1703593 BAIAP2L1 0.460997445  
ILMN\_3195401 GABPB1 0.460898485  
ILMN\_238530 RPLP1 0.460894509  
ILMN\_1653082 ELF4 0.460888151  
ILMN\_1765640 IRF3 0.460879014  
ILMN\_3212833 RPL7A 0.460828895  
ILMN\_1757350 CTNNB1 0.460624541  
ILMN\_1652768 RPS2 0.460478045  
ILMN\_2359776 GIT2 0.460460238  
ILMN\_1651950 TST1 0.460353918  
ILMN\_1698605 TMEM43 0.46033139  
ILMN\_1680831 BAZ1B 0.460323466  
ILMN\_1716876 MED27 0.460314161  
ILMN\_2188264 CYR61 0.460304717  
ILMN\_1765833 SLC39A2 0.460304566  
ILMN\_3310326 MIR221 0.460304111  
ILMN\_2361163 SSBP3 0.460284082  
ILMN\_1709880 RPLP0 0.460207624  
ILMN\_2186369 NCOR1 0.460093464  
ILMN\_1782788 CSDA 0.460078993  
ILMN\_1660498 RPS27 0.459992519  
ILMN\_1772605 FRS3 0.459990721  
ILMN\_1774207 ANGPT2 0.459766366  
ILMN\_2110167 POLR1E 0.459654191  
ILMN\_1811195 ZNF211 0.459643581  
ILMN\_3242700 RPS8 0.459598727  
ILMN\_2351795 C1orf41 0.459590453  
ILMN\_2349061 IRF7 0.459558832  
ILMN\_1691942 CCNI 0.459564313  
ILMN\_1709101 AKAP13 0.45951683  
ILMN\_1713249 PHE19 0.459476756  
ILMN\_2412139 CABYR 0.4591591  
ILMN\_1764721 RPL8 0.45901628  
ILMN\_3247893 FBA1 0.459086352  
ILMN\_1698766 PycARD 0.459055203  
ILMN\_1898605 BX119059 0.459011136  
ILMN\_1714945 ITPKC 0.459003403  
ILMN\_1697567 TPM3 0.458994636  
ILMN\_2359945 CES1 0.458979959  
ILMN\_1804316 TCAP 0.458896126  
ILMN\_2078334 CNOT10 0.458843159  
ILMN\_2054233 SENP6 0.458767315  
ILMN\_3295558 SFRS18 0.458730031  
ILMN\_2411963 RBM39 0.458597766  
ILMN\_1680996 ALOY5 0.458593537  
ILMN\_2211016 TMEM91 0.45855901  
ILMN\_2286870 CSNK1D 0.458534388  
ILMN\_1659058 PPP1R1D 0.458496397  
ILMN\_3295893 OTOP1 0.458474609  
ILMN\_1756705 GINTF18 0.458452486  
ILMN\_2403994 RALY 0.458416988  
ILMN\_2407619 CDC25C 0.458327386  
ILMN\_1790741 RNF126 0.458294463  
ILMN\_1771057 XAB2 0.45823484  
ILMN\_1669215 SRPK2 0.458136454  
ILMN\_1710078 TMEM181 0.458102189  
ILMN\_1815169 NCLM5 0.458022442

ILMN\_1761946 PROM2 -0.503555696  
ILMN\_1715214 PTPN7 -0.503560166  
ILMN\_3237817 REXD111 -0.503632609  
ILMN\_1687913 ELFN1 -0.503662309  
ILMN\_1789096 OSTalpha -0.503669878  
ILMN\_1692674 NKO1 -0.503718238  
ILMN\_2128967 C1orf1 -0.503737188  
ILMN\_1911344 AV650212 -0.504206738  
ILMN\_3190167 A098015 -0.504251274  
ILMN\_3297880 SEC13 -0.504493703  
ILMN\_1738268 IPK3 -0.504508001  
ILMN\_1852279 CK299576 -0.504514836  
ILMN\_1819939 DR980387 -0.504591517  
ILMN\_1786936 BM919382 -0.504621457  
ILMN\_1745887 FMO21 -0.504646385  
ILMN\_1655190 LOC100506085 -0.504729484  
ILMN\_2353129 EYA2 -0.504787763  
ILMN\_1733390 LARP1B -0.504800625  
ILMN\_1736441 PDXP -0.504809173  
ILMN\_1724658 BNP3 -0.504861638  
ILMN\_1703886 SLC16A2 -0.504887878  
ILMN\_1687576 EIF4E1B -0.505213691  
ILMN\_2136971 FBP3 -0.505288227  
ILMN\_1853920 BE220010 -0.505497234  
ILMN\_2073010 TMEM203 -0.505581376  
ILMN\_2315789 PTPRD -0.505668113  
ILMN\_1853624 MGA3T3 -0.505806766  
ILMN\_2404407 ABAT -0.505972293  
ILMN\_1764494 ATP5A1 -0.506207932  
ILMN\_2383229 A1CF -0.506440289  
ILMN\_1699357 SLC22A5 -0.50659589  
ILMN\_2373073 UGA -0.506676355  
ILMN\_3310216 MHR93 -0.506753163  
ILMN\_1677866 FOLH1B -0.506754882  
ILMN\_1760620 TMEM33 -0.50683517  
ILMN\_1737988 PRNP -0.507165205  
ILMN\_1838702 BG188175 -0.507191302  
ILMN\_1713139 DLGAP2 -0.507379587  
ILMN\_1720838 DCXR1 -0.507691584  
ILMN\_1675687 NA -0.507910038  
ILMN\_1779997 MEI3 -0.508118875  
ILMN\_3252969 LOC100128300 -0.508145796  
ILMN\_1692844 TBC1D19 -0.508185308  
ILMN\_1808806 SLC21A1 -0.508259079  
ILMN\_1747962 UTSR3R -0.50833173  
ILMN\_1736972 GKAP1 -0.508355847  
ILMN\_1755423 PTCRA -0.50839223  
ILMN\_1733135 TFAP2A -0.508586926  
ILMN\_1811933 SHMT1 -0.508693259  
ILMN\_1653388 GPM1 -0.508706522  
ILMN\_2390561 PCLR -0.508832718  
ILMN\_1776112 SLC10A1 -0.508930173  
ILMN\_1907620 DB299679 -0.509248462  
ILMN\_3245006 C12orf68 -0.509580572  
ILMN\_1675445 KIAA2018 -0.510026763  
ILMN\_1673535 MYL4 -0.510061044  
ILMN\_1730351 TEX19 -0.510294664  
ILMN\_1754913 WDR88 -0.510335484  
ILMN\_2359287 ITGA6 -0.510506363  
ILMN\_1910805 BE326664 -0.510634568  
ILMN\_1671337 SLC2A5 -0.511139467  
ILMN\_3212469 LOC1015061 -0.511203851  
ILMN\_1750879 TSPY3 -0.511230545  
ILMN\_1707741 TBC1D26 -0.511296813  
ILMN\_1752294 PCDH9 -0.511345644  
ILMN\_1704022 TMEM207 -0.511435344  
ILMN\_1687824 SEPH52 -0.511508303  
ILMN\_1814173 SMOARCA4 -0.511746028  
ILMN\_1853705 AW118645 -0.511781706  
ILMN\_1702489 TRIM63 -0.512012595  
ILMN\_1786050 RBBP9 -0.512156365  
ILMN\_1807095 MRPS36 -0.512169671  
ILMN\_2331266 NUNB -0.51227903  
ILMN\_2133125 RROA3 -0.512468119  
ILMN\_1704247 LAMA3 -0.512530561  
ILMN\_3251491 UQCRRB -0.51260398  
ILMN\_1814296 TRPM6 -0.512728476  
ILMN\_2144088 FDF1 -0.512739479  
ILMN\_1772057 COL28A1 -0.512864912  
ILMN\_3207962 GUSRP10 -0.512905482  
ILMN\_1715463 SOSTDC1 -0.513154285  
ILMN\_2183610 SERAC1 -0.513248865  
ILMN\_1752214 BC141517 -0.513370201  
ILMN\_1705637 ACN -0.513385788  
ILMN\_1804868 CTF4A1 -0.513730192  
ILMN\_1778173 AK3 -0.513854265  
ILMN\_1762033 NAFEP1D -0.514106867  
ILMN\_1749317 C1orf222 -0.514114082  
ILMN\_1785439 CD79B -0.514138304  
ILMN\_1764349 XYL8 -0.51425359  
ILMN\_1687914 TGM4 -0.514301779  
ILMN\_1804152 KCNHE -0.514395182  
ILMN\_3209098 FAM71E2 -0.514427173  
ILMN\_1736954 ZBTB78 -0.514450282  
ILMN\_1678647 CHIA -0.514500895  
ILMN\_1669363 TGM4 -0.514722009  
ILMN\_1782274 NYK -0.514754549  
ILMN\_1880103 BU734093 -0.514811679

|              |             |             |
|--------------|-------------|-------------|
| ILMN_1747386 | GLI53       | 0.458015336 |
| ILMN_1747499 | EMID1       | 0.45799925  |
| ILMN_1730660 | LGALS3      | 0.45796888  |
| ILMN_2141453 | RPL18A      | 0.45795375  |
| ILMN_3235356 | AB007962    | 0.457851179 |
| ILMN_1756439 | SCRN1       | 0.457820095 |
| ILMN_1755811 | FBXO4       | 0.457794517 |
| ILMN_2166506 | XRCC6       | 0.457676898 |
| ILMN_2082244 | FOXK1       | 0.457597612 |
| ILMN_1811765 | ADAMTS2     | 0.457472245 |
| ILMN_1815500 | ITPR3       | 0.457408683 |
| ILMN_1750459 | ANKRD36     | 0.457356405 |
| ILMN_2124769 | YBK1        | 0.457305924 |
| ILMN_2190214 | CHC11       | 0.457200764 |
| ILMN_1740587 | RPS11       | 0.457043372 |
| ILMN_1740466 | FAM46A      | 0.457032748 |
| ILMN_1774823 | RPL34       | 0.457027974 |
| ILMN_1683576 | MAGED2      | 0.457021028 |
| ILMN_1761844 | ZCCHC17     | 0.45686556  |
| ILMN_2390472 | TTC14       | 0.456593733 |
| ILMN_1801767 | ABHD3       | 0.456589212 |
| ILMN_1669703 | TNK2        | 0.456551278 |
| ILMN_1810844 | RARRS2      | 0.456525248 |
| ILMN_1752249 | FAM38A      | 0.45641201  |
| ILMN_1708881 | RAB20       | 0.45638184  |
| ILMN_1764835 | HELZ        | 0.45637095  |
| ILMN_1807467 | RGNFE       | 0.456352172 |
| ILMN_1790689 | CRISP1D2    | 0.456320521 |
| ILMN_1782167 | RPL32       | 0.456037408 |
| ILMN_1808114 | LYVE1       | 0.455884003 |
| ILMN_3222402 | FLJ45340    | 0.455596647 |
| ILMN_1752802 | CLPTM11     | 0.455592646 |
| ILMN_3304203 | CLEC2D      | 0.455569776 |
| ILMN_1750401 | C17orf62    | 0.455566774 |
| ILMN_1754865 | PABPC4      | 0.455544053 |
| ILMN_1760683 | SRSF9       | 0.455512329 |
| ILMN_1710495 | PAPLN       | 0.455396058 |
| ILMN_1716552 | ENAH        | 0.455332832 |
| ILMN_2403458 | SMARCB1     | 0.455260414 |
| ILMN_1717101 | MINK1       | 0.455232126 |
| ILMN_2381599 | RPL3        | 0.455229163 |
| ILMN_3237368 | MAFG        | 0.455169143 |
| ILMN_2386179 | ZMYND8      | 0.455167454 |
| ILMN_2097748 | DRBL1       | 0.455148183 |
| ILMN_1778561 | WEE1        | 0.455142241 |
| ILMN_3238633 | SDHAF2      | 0.45514007  |
| ILMN_3225784 | LAMR1P15    | 0.455105808 |
| ILMN_2400940 | L3MBTL1     | 0.455092074 |
| ILMN_1709471 | CNTN4       | 0.455042631 |
| ILMN_1761939 | TFPI1       | 0.455010286 |
| ILMN_2293131 | ARHGEF1     | 0.454964324 |
| ILMN_1742330 | PXN1B1      | 0.454712793 |
| ILMN_1723358 | SCARA3      | 0.454660442 |
| ILMN_3202432 | RPSA        | 0.454545945 |
| ILMN_1722898 | SFRP2       | 0.454527613 |
| ILMN_2072140 | BTF3L4      | 0.454515068 |
| ILMN_3287219 | NA          | 0.454394549 |
| ILMN_2325194 | PHFG        | 0.454342039 |
| ILMN_2325274 | ZNF274      | 0.454333695 |
| ILMN_1659095 | RPL7A       | 0.454243873 |
| ILMN_2390619 | FBNL2       | 0.453962243 |
| ILMN_2370208 | CNTN3       | 0.45392998  |
| ILMN_1804530 | ARPC1B      | 0.453900765 |
| ILMN_1807493 | ACVR11      | 0.453889881 |
| ILMN_3233388 | RELL1       | 0.453888401 |
| ILMN_2169261 | TNNI2       | 0.453826047 |
| ILMN_1792079 | ITGAS       | 0.453730692 |
| ILMN_1805158 | TAF1A       | 0.45364869  |
| ILMN_2354391 | RAB4B-EGLN2 | 0.453546915 |
| ILMN_3309849 | MIR140      | 0.453366351 |
| ILMN_2410986 | STAT3       | 0.453245808 |
| ILMN_2202948 | BUB1        | 0.453223566 |
| ILMN_1721035 | M5A46A      | 0.453172568 |
| ILMN_1664631 | ADAM12B     | 0.453147463 |
| ILMN_1713934 | LITAF       | 0.453113233 |
| ILMN_1754199 | BCL7B       | 0.453082335 |
| ILMN_1741965 | NFKB1       | 0.453071023 |
| ILMN_1664063 | FAM129C     | 0.453066622 |
| ILMN_2288582 | PCDH10      | 0.452997744 |
| ILMN_1713182 | C3          | 0.452972113 |
| ILMN_3242105 | LVPD1       | 0.452759217 |
| ILMN_3217172 | RPS2        | 0.452752332 |
| ILMN_1681503 | MCM2        | 0.452715003 |
| ILMN_1734608 | ZNF77       | 0.452703777 |
| ILMN_1704196 | DIS2        | 0.452690689 |
| ILMN_1676984 | DDIT3       | 0.452662387 |
| ILMN_1740523 | KTN1        | 0.452153171 |
| ILMN_1754195 | RPL31       | 0.45209446  |
| ILMN_1714352 | DMWD        | 0.451937413 |
| ILMN_1680435 | NEPFP5      | 0.45188869  |
| ILMN_2329834 | CPIB1       | 0.451856577 |
| ILMN_1727862 | HPS4        | 0.451679467 |
| ILMN_2130218 | PAK3        | 0.451596701 |
| ILMN_1716062 | MYL4        | 0.451554519 |
| ILMN_1674402 | TMEM71      | 0.45145907  |
| ILMN_1695872 | CDC42       | 0.451363878 |
| ILMN_1775734 | SH2D3C      | 0.451348834 |
| ILMN_1721088 | NSA415      | 0.451315440 |

|              |           |              |
|--------------|-----------|--------------|
| ILMN_1877421 | BX092644  | -0.514868083 |
| ILMN_1680082 | Y08699    | -0.514946911 |
| ILMN_3243846 | FOLH4     | -0.515079024 |
| ILMN_1802454 | PCGF3     | -0.515393286 |
| ILMN_2183180 | PEX5L     | -0.515493834 |
| ILMN_1792432 | CSPG4P5   | -0.515546233 |
| ILMN_1653358 | FUT3      | -0.51559486  |
| ILMN_2148497 | C20orf107 | -0.515687731 |
| ILMN_1886533 | CDKL2     | -0.515794955 |
| ILMN_1688455 | IKAP056A  | -0.515762004 |
| ILMN_1838238 | DA717721  | -0.515901685 |
| ILMN_1780861 | METRN1    | -0.515964956 |
| ILMN_1804569 | GAS2      | -0.516041405 |
| ILMN_1809139 | AHCTF1    | -0.516047655 |
| ILMN_2384444 | ANGPTL4   | -0.516108487 |
| ILMN_1739235 | DMG       | -0.516202447 |
| ILMN_1804900 | SLOC25A10 | -0.516229726 |
| ILMN_1778951 | C6orf203  | -0.516335007 |
| ILMN_1904400 | AW136452  | -0.51649313  |
| ILMN_1662413 | HGSNAT    | -0.516611445 |
| ILMN_2123861 | MDC51     | -0.516626379 |
| ILMN_1700810 | HSP90AA1  | -0.516639297 |
| ILMN_2158857 | EEF1E1    | -0.516785613 |
| ILMN_3245287 | SCNSA     | -0.516893107 |
| ILMN_3246169 | PRR20A    | -0.516980538 |
| ILMN_1679209 | HSPA9     | -0.517134807 |
| ILMN_3307025 | ZDHHC4    | -0.517198247 |
| ILMN_1697353 | SRPB2     | -0.517212459 |
| ILMN_3241149 | TMEM236   | -0.517326934 |
| ILMN_1752952 | MMP28     | -0.517357633 |
| ILMN_2149494 | NPL       | -0.517381667 |
| ILMN_1693932 | LOC85733  | -0.517443074 |
| ILMN_3144448 | HRD9      | -0.517524095 |
| ILMN_2085922 | WRB       | -0.517617115 |
| ILMN_2146372 | KCTD6     | -0.517665062 |
| ILMN_1739155 | OR8A4     | -0.517794518 |
| ILMN_3259884 | SLCGA19   | -0.517852299 |
| ILMN_1688405 | FLJ29758  | -0.517939203 |
| ILMN_2149032 | CRESL1    | -0.517931877 |
| ILMN_1687315 | RXRA      | -0.518304332 |
| ILMN_3184048 | FAM115C   | -0.518494964 |
| ILMN_3245084 | AK127966  | -0.518640285 |
| ILMN_2195914 | GGH       | -0.518653758 |
| ILMN_1688463 | SUN       | -0.518787942 |
| ILMN_3685781 | C14orf142 | -0.518848458 |
| ILMN_2341626 | MARCH8    | -0.51890008  |
| ILMN_2381397 | HSPD1     | -0.519105994 |
| ILMN_1889767 | NA        | -0.519133595 |
| ILMN_1752557 | NEU2      | -0.519343522 |
| ILMN_2211189 | HNR4P     | -0.519348465 |
| ILMN_1797154 | AZGP1     | -0.519401517 |
| ILMN_1731326 | PRR23C    | -0.519563632 |
| ILMN_2369104 | TRAPP6B   | -0.519696486 |
| ILMN_2120360 | LOC729164 | -0.519777819 |
| ILMN_1782853 | SRC       | -0.520138353 |
| ILMN_1765417 | RBBP9     | -0.520252026 |
| ILMN_2215355 | AK126539  | -0.520298379 |
| ILMN_2177732 | RANBP6    | -0.520347294 |
| ILMN_1678217 | DMRTC18   | -0.520372543 |
| ILMN_1874018 | LOC729175 | -0.520486507 |
| ILMN_1883824 | ZDHHC9    | -0.521031001 |
| ILMN_1686951 | TMS5F2    | -0.521118573 |
| ILMN_2205767 | CTNNA3    | -0.52114872  |
| ILMN_1740949 | LRRC19    | -0.521160758 |
| ILMN_2380754 | CNG1      | -0.521574504 |
| ILMN_2175020 | RPL32P3   | -0.521678436 |
| ILMN_1667323 | SCLT3A4   | -0.521752141 |
| ILMN_2151064 | GBA3      | -0.521898466 |
| ILMN_1786343 | MUC5B     | -0.521918333 |
| ILMN_1681892 | OAZ2      | -0.521989156 |
| ILMN_1797310 | ATP6VID   | -0.522311281 |
| ILMN_1905488 | CR738423  | -0.522326041 |
| ILMN_1768877 | CDC7      | -0.522392003 |
| ILMN_2354463 | CYBP1     | -0.522515687 |
| ILMN_1813434 | ATP10A    | -0.522658766 |
| ILMN_1765438 | C6orf184  | -0.522887536 |
| ILMN_1764500 | C3orf10   | -0.522959513 |
| ILMN_1697820 | HINT2     | -0.523044941 |
| ILMN_1677384 | FIGFB3    | -0.523183544 |
| ILMN_1795270 | MYS1L     | -0.523300375 |
| ILMN_1766103 | KCNK18    | -0.523316736 |
| ILMN_2383455 | SUOX      | -0.523417062 |
| ILMN_1671215 | FBXL19    | -0.52366558  |
| ILMN_1889200 | DHHD      | -0.523803741 |
| ILMN_1768029 | OR5A1     | -0.523858155 |
| ILMN_1714446 | PLG       | -0.523944958 |
| ILMN_1757165 | LMBRL1    | -0.524102052 |
| ILMN_1717935 | SPTA1     | -0.524396463 |
| ILMN_1696699 | FAM18AA   | -0.52440729  |
| ILMN_1765787 | TCF10L2   | -0.524678266 |
| ILMN_2228160 | MISA      | -0.524777489 |
| ILMN_1899387 | BCO39440  | -0.52485151  |
| ILMN_1882652 | BGG67942  | -0.524859177 |
| ILMN_1697118 | ARMC6     | -0.524922616 |
| ILMN_3244200 | FLJ00326  | -0.525393238 |
| ILMN_1769433 | IQGAP2    | -0.525487026 |
| ILMN_2118926 | PPV2      | -0.525654617 |
| ILMN_1743357 | XPMPF2    | -0.52561451  |

|              |              |              |
|--------------|--------------|--------------|
| ILMN_3234997 | MAP7D1       | 0.45126206   |
| ILMN_2348243 | STRADA       | 0.451205842  |
| ILMN_1705594 | NAT10        | 0.451198855  |
| ILMN_1715724 | NR_024104    | 0.451153386  |
| ILMN_3241491 | NA           | 0.45108691   |
| ILMN_1844408 | PLXNA2       | 0.451060115  |
| ILMN_1788886 | TOX          | 0.451018036  |
| ILMN_1782331 | TDG          | 0.451008464  |
| ILMN_2041780 | SMYD2        | 0.450976987  |
| ILMN_2328560 | HR23L2       | 0.450875176  |
| ILMN_1797813 | SUZ12        | 0.450856446  |
| ILMN_1652797 | FAM174B      | 0.450827583  |
| ILMN_3302356 | RPS14        | 0.45068858   |
| ILMN_1780825 | RRAS         | 0.450549552  |
| ILMN_1723115 | CLEC4F       | 0.450517603  |
| ILMN_1760343 | ADRM1        | 0.450449874  |
| ILMN_2054145 | PAK1IP1      | 0.450434438  |
| ILMN_1666633 | BCO10030     | 0.450353744  |
| ILMN_2353697 | HINF1        | 0.450332812  |
| ILMN_1783606 | MIL5         | 0.450215896  |
| ILMN_1785202 | STAT4        | 0.450208557  |
| ILMN_2379551 | SCN11        | 0.450185331  |
| ILMN_1814213 | PQLC3        | 0.450116862  |
| ILMN_3243664 | NPIP3        | 0.450100439  |
| ILMN_2272074 | TROVE2       | 0.450095038  |
| ILMN_2318111 | RANBP3       | 0.45007834   |
| ILMN_2397024 | SPD          | 0.44997208   |
| ILMN_1686664 | MT2A         | 0.449912477  |
| ILMN_1653469 | RPL12        | 0.449821287  |
| ILMN_3268914 | CLEC2D       | 0.449719824  |
| ILMN_1706645 | MB21D1       | 0.449715235  |
| ILMN_1702708 | PPP2R3A      | 0.449700627  |
| ILMN_1753353 | SERP         | 0.449485162  |
| ILMN_1668535 | JOSD1        | 0.449402047  |
| ILMN_1728224 | OGFR         | 0.449345766  |
| ILMN_1688938 | KCNRG        | 0.449288469  |
| ILMN_1757627 | ZMYND19      | 0.449276631  |
| ILMN_1676765 | RPL18A       | 0.44926399   |
| ILMN_2060600 | HLA-DQB5     | 0.449254111  |
| ILMN_1726064 | PAK1IP1      | 0.449243504  |
| ILMN_3239060 | KRBA1        | 0.449215514  |
| ILMN_1673023 | EP400        | 0.449195924  |
| ILMN_2041577 | GPR172A      | 0.4491461    |
| ILMN_1695404 | LY8E         | 0.44907354   |
| ILMN_1769779 | PTP4A3       | 0.449049784  |
| ILMN_1777444 | STX5         | 0.449042902  |
| ILMN_1681415 | SIGLEC7      | 0.449004907  |
| ILMN_3253901 | HAVCR1       | 0.448970223  |
| ILMN_1661647 | LOC349114    | 0.448884574  |
| ILMN_3226467 | AHD3375      | 0.448826688  |
| ILMN_1691611 | HRNPFA1L2    | 0.448776653  |
| ILMN_1679727 | CLK1         | 0.448666923  |
| ILMN_1711909 | EDEM2        | 0.448644553  |
| ILMN_2377496 | ERCC1        | 0.448495252  |
| ILMN_1797566 | SNAP47       | 0.4484890352 |
| ILMN_1793681 | CDC6B        | 0.448458781  |
| ILMN_2116366 | RPL12        | 0.448323302  |
| ILMN_1666635 | RPS14        | 0.448322896  |
| ILMN_1666169 | NBR2         | 0.44831965   |
| ILMN_1726222 | FLOT2        | 0.448298233  |
| ILMN_2174341 | GPR83        | 0.448193924  |
| ILMN_1753468 | CDS3         | 0.448076982  |
| ILMN_1680932 | WDR85        | 0.44807457   |
| ILMN_1770742 | TMEM55B      | 0.447957298  |
| ILMN_2244108 | ITGB1        | 0.447946666  |
| ILMN_3265343 | LOC100506144 | 0.447843321  |
| ILMN_3250389 | GPAAL1       | 0.447828016  |
| ILMN_1688279 | PIRIB        | 0.447814035  |
| ILMN_1703565 | GLTSCR2      | 0.447796417  |
| ILMN_1779190 | ALKB8        | 0.447747574  |
| ILMN_1755658 | ABI3         | 0.44757417   |
| ILMN_1654324 | HEYL         | 0.447545097  |
| ILMN_1762316 | CPFSF1       | 0.447520149  |
| ILMN_1778111 | FLJ5340      | 0.447448097  |
| ILMN_1678235 | KIAL1267     | 0.447408591  |
| ILMN_2393254 | CAPNS1       | 0.447369863  |
| ILMN_1667476 | LTBR         | 0.447368787  |
| ILMN_1728049 | S100A16      | 0.447354028  |
| ILMN_1783806 | DTNBP1       | 0.447298964  |
| ILMN_2357809 | G3BP1        | 0.447275208  |
| ILMN_1769329 | GOLGA6       | 0.447130448  |
| ILMN_1727271 | WARS         | 0.447090957  |
| ILMN_1803846 | E1F1         | 0.446886529  |
| ILMN_2077905 | PIGFRN       | 0.446878305  |
| ILMN_2112301 | DRAP1        | 0.446867542  |
| ILMN_1756542 | TBC1D17      | 0.44667715   |
| ILMN_1781810 | NFE2L3       | 0.44663234   |
| ILMN_1659771 | RPL13AP3     | 0.446629337  |
| ILMN_2062524 | RBBP4        | 0.446593908  |
| ILMN_1730797 | RUNX1        | 0.446559507  |
| ILMN_2351298 | WIPF1        | 0.446350575  |
| ILMN_3198464 | BCO5S80      | 0.446204934  |
| ILMN_1735180 | NCTN         | 0.446189674  |
| ILMN_1754839 | DHX15        | 0.446140419  |
| ILMN_1732725 | PPP6R3       | 0.446139203  |
| ILMN_1661332 | ADCK2        | 0.446134057  |
| ILMN_1681160 | CTCFP1       | 0.446086097  |
| ILMN_1752953 | BLCL12       | 0.446061554  |

|              |                 |              |
|--------------|-----------------|--------------|
| ILMN_1770692 | WDR12           | -0.525692812 |
| ILMN_1764207 | RPRD1A          | -0.525750873 |
| ILMN_2145396 | AKR7A3          | -0.525900866 |
| ILMN_2145038 | ADP7            | -0.526290941 |
| ILMN_1778242 | CALM1           | -0.526334897 |
| ILMN_1684919 | ADAMTSL1        | -0.526380749 |
| ILMN_2226628 | ZNF184          | -0.526471014 |
| ILMN_2167011 | ECHDC1          | -0.526494888 |
| ILMN_1853386 | CH22974         | -0.526498186 |
| ILMN_2141204 | KLHLDC2         | -0.52649952  |
| ILMN_1870085 | DR279316        | -0.526766571 |
| ILMN_1695290 | FERM2T          | -0.527068055 |
| ILMN_3249756 | DNASE1L1        | -0.527390238 |
| ILMN_1677723 | ANGPT1          | -0.527429853 |
| ILMN_1893948 | BK109720        | -0.527495019 |
| ILMN_1755192 | COL1C1          | -0.527606965 |
| ILMN_3239073 | AY343892        | -0.527653051 |
| ILMN_2163796 | RABGGTB         | -0.527666892 |
| ILMN_1764609 | PWWP2B          | -0.527707985 |
| ILMN_1738849 | SLC9A2          | -0.527817289 |
| ILMN_1763262 | LOC41179        | -0.527902656 |
| ILMN_1771732 | C10orf132-AS3MT | -0.527944663 |
| ILMN_1791306 | C9orf103        | -0.528003081 |
| ILMN_1819515 | AF009300        | -0.52818435  |
| ILMN_2379931 | PIGO            | -0.528240346 |
| ILMN_1766136 | RAB37           | -0.528429348 |
| ILMN_1817371 | C4orf48B3       | -0.528434192 |
| ILMN_2289576 | VWAI1           | -0.528447683 |
| ILMN_1668507 | DDAH1           | -0.528519104 |
| ILMN_1735552 | KIF1B           | -0.528843509 |
| ILMN_1753026 | LPFR1           | -0.528963333 |
| ILMN_1768346 | EFHA1           | -0.529129338 |
| ILMN_1786172 | CTP2H2          | -0.529164079 |
| ILMN_2326324 | LHDC            | -0.529191283 |
| ILMN_1681154 | ZBTB39          | -0.52925974  |
| ILMN_1720235 | ADSSL1          | -0.529377624 |
| ILMN_1697550 | ACY2            | -0.529467745 |
| ILMN_1800935 | ARV1            | -0.52948837  |
| ILMN_1654692 | NA              | -0.529721452 |
| ILMN_3274671 | LOC283481       | -0.529906515 |
| ILMN_3238359 | NAV3            | -0.53031015  |
| ILMN_2184556 | SLCAA4          | -0.530418995 |
| ILMN_1745988 | NODT12          | -0.530561329 |
| ILMN_1776263 | TMEM174         | -0.530709472 |
| ILMN_1656672 | MYLK            | -0.530930463 |
| ILMN_1775175 | RPL3L           | -0.531010155 |
| ILMN_2282352 | PHYH            | -0.531011426 |
| ILMN_3241066 | FAM90A7         | -0.531094196 |
| ILMN_1692477 | MGAT5B          | -0.531174179 |
| ILMN_1762134 | ECHDC1          | -0.531384733 |
| ILMN_2347888 | LARPA4          | -0.531421623 |
| ILMN_3187758 | SEK             | -0.531481525 |
| ILMN_1698731 | SEC31B          | -0.531772106 |
| ILMN_1716591 | SPRRIA          | -0.531791322 |
| ILMN_1806330 | C17orf78        | -0.531865063 |
| ILMN_1806581 | FAM30A          | -0.531935391 |
| ILMN_1712836 | C6orf72         | -0.532007312 |
| ILMN_1775814 | GHR             | -0.532190939 |
| ILMN_1831176 | BG208291        | -0.532228289 |
| ILMN_1780924 | SLC43A1         | -0.532524345 |
| ILMN_1667018 | ACE2            | -0.532789887 |
| ILMN_2465586 | CC2D2A          | -0.532971626 |
| ILMN_1756162 | EXOSC8          | -0.532995794 |
| ILMN_1859905 | BM932227        | -0.533101596 |
| ILMN_3254046 | BI99339         | -0.53313917  |
| ILMN_2343010 | BOLA3           | -0.533559245 |
| ILMN_1748650 | MRRP145         | -0.533597335 |
| ILMN_3238299 | NHEK1           | -0.533661583 |
| ILMN_2183885 | C7orf11         | -0.533824808 |
| ILMN_3307252 | STMN1           | -0.534020662 |
| ILMN_1681221 | C9orf100        | -0.534027857 |
| ILMN_1763461 | ALDH7A1         | -0.53438585  |
| ILMN_1712405 | LOC100506085    | -0.53449286  |
| ILMN_1904378 | BK109479        | -0.534579135 |
| ILMN_1657349 | EPHA6           | -0.534852751 |
| ILMN_2364305 | FECH            | -0.534944557 |
| ILMN_1669781 | PRLR            | -0.535165674 |
| ILMN_1755047 | LRRC2           | -0.535259457 |
| ILMN_1820572 | BX112399        | -0.535497646 |
| ILMN_1904578 | COE1            | -0.535606923 |
| ILMN_1793072 | HMDCC II        | -0.535885453 |
| ILMN_1658917 | SLC1A1          | -0.535931802 |
| ILMN_1705066 | BTBD11          | -0.535935482 |
| ILMN_1762631 | TSC2            | -0.535999948 |
| ILMN_3268348 | LINC00773       | -0.535999642 |
| ILMN_1814770 | CPNE4           | -0.536217297 |
| ILMN_1658800 | BRPF3           | -0.536451813 |
| ILMN_1770911 | NRSN2           | -0.536619549 |
| ILMN_3232806 | HIGD1A          | -0.536715038 |
| ILMN_1672693 | IGSF14          | -0.536856645 |
| ILMN_1665775 | HSDCC2          | -0.537325568 |
| ILMN_1728975 | SCOL            | -0.537326825 |
| ILMN_2067682 | LOC401431       | -0.537384697 |
| ILMN_1705225 | PRTG            | -0.537502154 |
| ILMN_1819225 | LOC100506368    | -0.537886225 |
| ILMN_2064898 | CDC56           | -0.538002776 |
| ILMN_3261469 | LOC10130815     | -0.538484543 |
| ILMN_3192401 | NA              | -0.538583716 |

|              |          |              |
|--------------|----------|--------------|
| ILMN_1762801 | KLF12    | 0.445941449  |
| ILMN_1809500 | CEP68    | 0.445938563  |
| ILMN_2337923 | TPD520.1 | 0.445789782  |
| ILMN_1807234 | ZNF700   | 0.445720791  |
| ILMN_2358652 | NXF1     | 0.44564709   |
| ILMN_1779828 | EDEM1    | 0.44563996   |
| ILMN_1790891 | CKAP4    | 0.445543014  |
| ILMN_2407589 | CTDP1    | 0.445528548  |
| ILMN_2276019 | RPL23AP7 | 0.445517116  |
| ILMN_1800451 | MED16    | 0.445503687  |
| ILMN_1753534 | RPS18    | 0.445483461  |
| ILMN_1706434 | CSDP1    | 0.445445888  |
| ILMN_2386287 | RFX2     | 0.445416343  |
| ILMN_3302919 | MYOF     | 0.445406739  |
| ILMN_1724581 | EDC3     | 0.445361033  |
| ILMN_2331087 | MSA47    | 0.445317122  |
| ILMN_2188533 | RPL12    | 0.445311071  |
| ILMN_3211199 | ZNF316   | 0.445307619  |
| ILMN_1737586 | EIF4H    | 0.445294865  |
| ILMN_1796229 | FGFR1    | 0.445259056  |
| ILMN_1657750 | CNWM1    | 0.445193596  |
| ILMN_1732705 | HCCF1    | 0.445102441  |
| ILMN_1716973 | POLM     | 0.445082064  |
| ILMN_3247325 | PPI3759  | 0.444981661  |
| ILMN_3235096 | SNORA28  | 0.444960147  |
| ILMN_2294784 | PIDOM1   | 0.444955218  |
| ILMN_1690464 | TMEM20   | 0.444814807  |
| ILMN_1740345 | STX5     | 0.444801406  |
| ILMN_2388070 | TMEM44   | 0.444799547  |
| ILMN_2056551 | RBMX2    | 0.444737082  |
| ILMN_1723709 | C9orf116 | 0.444663122  |
| ILMN_1740395 | RAVER1   | 0.444612397  |
| ILMN_2371911 | MUC1     | 0.444565986  |
| ILMN_1667432 | HYAL3    | 0.444524804  |
| ILMN_1684258 | RPS28    | 0.444474075  |
| ILMN_2211003 | GAS2L3   | 0.444417969  |
| ILMN_1663313 | AMY1A    | 0.444409425  |
| ILMN_1713086 | RPL27A   | 0.444336027  |
| ILMN_2204020 | GRCX2    | 0.444290607  |
| ILMN_1775743 | BTIG1    | 0.444269769  |
| ILMN_3201663 | RPL22    | 0.444258101  |
| ILMN_1801383 | SMG1     | 0.444220046  |
| ILMN_1872122 | LCOR     | 0.444133794  |
| ILMN_1694398 | EF3F     | 0.444128372  |
| ILMN_1804279 | PTPRC    | 0.444121772  |
| ILMN_1773079 | COL3A1   | 0.443958528  |
| ILMN_1780315 | PUSL1    | 0.443928897  |
| ILMN_1736597 | TKT      | 0.443811163  |
| ILMN_2342835 | P2RY14   | 0.443785743  |
| ILMN_1802251 | PTGIP1P  | 0.443758713  |
| ILMN_2326737 | PPE      | 0.443728586  |
| ILMN_3247797 | abpPars  | 0.443688609  |
| ILMN_3246766 | NPIP3    | 0.443631858  |
| ILMN_1770963 | NAALADL1 | 0.443538817  |
| ILMN_1747460 | TMEM184B | 0.44353101   |
| ILMN_1708992 | ADAMTSL1 | 0.443478537  |
| ILMN_2203588 | MYL5     | 0.4434248189 |
| ILMN_1669772 | LRP1     | 0.443216306  |
| ILMN_1815745 | SOX4     | 0.443069787  |
| ILMN_1708743 | NTSDC2   | 0.443060534  |
| ILMN_1665107 | ITGB1BP1 | 0.443051536  |
| ILMN_1744822 | BICCN1   | 0.442981595  |
| ILMN_2319344 | APEX1    | 0.442963805  |
| ILMN_1781752 | CLEC16A  | 0.442787825  |
| ILMN_1672081 | NEURL    | 0.442760296  |
| ILMN_2354673 | PAK4     | 0.442524944  |
| ILMN_2401155 | PUM1     | 0.44252448   |
| ILMN_2410909 | ACT1     | 0.442497425  |
| ILMN_1698159 | ANKRD6   | 0.442387216  |
| ILMN_1724598 | RABL2A   | 0.442386477  |
| ILMN_1760714 | RPS3     | 0.442263578  |
| ILMN_1728845 | SMARCD1  | 0.442226584  |
| ILMN_1661589 | CD151    | 0.442179675  |
| ILMN_1740319 | IFI272   | 0.442154014  |
| ILMN_1729408 | C7orf20B | 0.442143418  |
| ILMN_1709809 | NHP2L1   | 0.442111759  |
| ILMN_1738237 | HS1BP3   | 0.441985862  |
| ILMN_2401714 | MSA41    | 0.441976782  |
| ILMN_2287157 | BPAG1    | 0.441941983  |
| ILMN_1683775 | EDN1     | 0.441840112  |
| ILMN_1681998 | AP2B1    | 0.441819304  |
| ILMN_2352042 | MRP14    | 0.441781632  |
| ILMN_1806023 | JUN      | 0.441666005  |
| ILMN_1757439 | RBM14    | 0.441652846  |
| ILMN_1779109 | ASPM1    | 0.441628701  |
| ILMN_1757827 | VDSP1    | 0.441589766  |
| ILMN_2312709 | LCMT1    | 0.44152176   |
| ILMN_1670638 | PITPNC1  | 0.441519568  |
| ILMN_2403247 | CMTM7    | 0.441510553  |
| ILMN_1652166 | GUCY1B2  | 0.441470903  |
| ILMN_2095759 | CGFR1    | 0.441469741  |
| ILMN_1694571 | SPDYE7P  | 0.441456687  |
| ILMN_3178471 | ESPNL    | 0.44133197   |
| ILMN_2186061 | PFKFB3   | 0.44129708   |
| ILMN_1745992 | FAM203A  | 0.441290727  |
| ILMN_1724990 | C3orf75  | 0.44122011   |
| ILMN_2356786 | AOD1     | 0.440978661  |
| ILMN_2411076 | MATR3    | 0.440767037  |

|              |              |              |
|--------------|--------------|--------------|
| ILMN_1687508 | ALDH7A1      | -0.53861205  |
| ILMN_2216815 | MAP7         | -0.538736807 |
| ILMN_1769721 | SP6          | -0.538766055 |
| ILMN_3234735 | IRX1         | -0.5387863   |
| ILMN_1779673 | HDFGL1       | -0.538773018 |
| ILMN_1886117 | AI187771     | -0.538847947 |
| ILMN_1775442 | SPDYE7P      | -0.538962737 |
| ILMN_3246345 | UCRP         | -0.539329545 |
| ILMN_1785284 | ALDH4A1      | -0.539367889 |
| ILMN_1762665 | SEPRMC1      | -0.539478515 |
| ILMN_3273185 | AK311113     | -0.539494976 |
| ILMN_1844882 | BQ024020     | -0.539578779 |
| ILMN_1777366 | TTC35        | -0.539754379 |
| ILMN_2218104 | PAH          | -0.539769584 |
| ILMN_3241783 | TJ00326      | -0.540080258 |
| ILMN_2153216 | TPP2         | -0.540341644 |
| ILMN_1787591 | XPA          | -0.540371524 |
| ILMN_1656285 | METTL7A      | -0.540388451 |
| ILMN_1916137 | BFS13551     | -0.540600349 |
| ILMN_1719083 | OR56A3       | -0.540737267 |
| ILMN_3179275 | HDR555       | -0.541055978 |
| ILMN_1797925 | MOC52        | -0.541074915 |
| ILMN_1777797 | AFM          | -0.541093545 |
| ILMN_1797281 | RGP06        | -0.541182387 |
| ILMN_2219767 | MYCN         | -0.541364186 |
| ILMN_1736533 | RND2         | -0.541373319 |
| ILMN_1725157 | NEK5         | -0.541369097 |
| ILMN_1711245 | SCG3         | -0.541853722 |
| ILMN_1781242 | SOST         | -0.541907144 |
| ILMN_1740076 | SLC16A12     | -0.542099163 |
| ILMN_2154101 | UPRT         | -0.542168355 |
| ILMN_1746664 | WSR2         | -0.542190398 |
| ILMN_1789150 | THAP5        | -0.542281519 |
| ILMN_1676248 | SEMA4G       | -0.542820602 |
| ILMN_3236437 | PCAN1        | -0.543033726 |
| ILMN_2296510 | SLCSA12      | -0.543113336 |
| ILMN_2173740 | ASB8         | -0.543180105 |
| ILMN_3237529 | DEFB10B8     | -0.543238237 |
| ILMN_1892566 | CACNA1C      | -0.543445122 |
| ILMN_3245331 | DHRS4L1      | -0.543603027 |
| ILMN_1746945 | CSMD1        | -0.543670605 |
| ILMN_1817816 | BCO32017     | -0.543678273 |
| ILMN_1801378 | COQ3         | -0.543689498 |
| ILMN_2308493 | RHOF         | -0.543707812 |
| ILMN_1708660 | RWDD4        | -0.543813504 |
| ILMN_1721011 | LCN1         | -0.544125823 |
| ILMN_1786444 | LPL          | -0.544561707 |
| ILMN_1770853 | CHST5        | -0.545087916 |
| ILMN_1799128 | SLC30A9      | -0.545157432 |
| ILMN_1802007 | HMG2T        | -0.545369097 |
| ILMN_1791293 | COX7A2       | -0.545484006 |
| ILMN_1663640 | MAOA         | -0.545548392 |
| ILMN_1803218 | GPR139       | -0.545553832 |
| ILMN_1702568 | FAM125B      | -0.545748858 |
| ILMN_1813374 | C19orf28     | -0.545760594 |
| ILMN_1803211 | FRXO2        | -0.545988623 |
| ILMN_1762993 | PIGV         | -0.54593742  |
| ILMN_1754991 | GNRH1        | -0.546138577 |
| ILMN_1893033 | DB307015     | -0.54640171  |
| ILMN_3264466 | FAM54B       | -0.546688574 |
| ILMN_1701497 | CDS1         | -0.546701974 |
| ILMN_2352633 | IRXGAP24     | -0.546808917 |
| ILMN_1681123 | KIAA0562     | -0.546937047 |
| ILMN_3243788 | TMEM146      | -0.546982262 |
| ILMN_1840036 | BM672267     | -0.547017824 |
| ILMN_1718079 | H0XB1        | -0.547144388 |
| ILMN_2099798 | VPLA1        | -0.547279987 |
| ILMN_3296096 | SLCSA7P1     | -0.547687232 |
| ILMN_1696318 | LOC100130691 | -0.54782038  |
| ILMN_1682763 | ALB          | -0.54811069  |
| ILMN_3238143 | D2HGDH       | -0.548932305 |
| ILMN_1781980 | CFC1B        | -0.548937221 |
| ILMN_1682081 | RTTAP3-2     | -0.548976507 |
| ILMN_2115421 | SLCSA16      | -0.549100652 |
| ILMN_1685974 | SLC25A33     | -0.549215452 |
| ILMN_1746788 | TRIM10       | -0.549229945 |
| ILMN_2339779 | ATPGV1E1     | -0.549360649 |
| ILMN_1902209 | BU743228     | -0.549379216 |
| ILMN_2226324 | BRPA4L       | -0.549446296 |
| ILMN_2194467 | SGO3         | -0.549646883 |
| ILMN_1754423 | C3orf23      | -0.550346849 |
| ILMN_2352197 | LTBP4        | -0.550669887 |
| ILMN_3302625 | DA626616     | -0.550799273 |
| ILMN_1774028 | MTRF1        | -0.550816676 |
| ILMN_2143240 | ANGPTL3      | -0.550923395 |
| ILMN_2375879 | VEGFA        | -0.550954072 |
| ILMN_1757504 | REG3A        | -0.550957418 |
| ILMN_1683903 | PDPK1        | -0.550991105 |
| ILMN_2228780 | SLCSA11      | -0.550993879 |
| ILMN_1692914 | CTRX3        | -0.551099942 |
| ILMN_2134039 | ACN9         | -0.551346829 |
| ILMN_1728803 | HMP19        | -0.55157368  |
| ILMN_2373515 | HSP90AA1     | -0.551724529 |
| ILMN_3276971 | DVL1         | -0.551893951 |
| ILMN_1652128 | LMBRD1       | -0.552027522 |
| ILMN_1749081 | AUTS2        | -0.552080282 |
| ILMN_1677962 | GPMN         | -0.552188823 |
| ILMN_1727813 | BRPA4        | -0.552442047 |

|              |            |             |
|--------------|------------|-------------|
| ILMN_2188893 | MAP2K2     | 0.440753859 |
| ILMN_2307656 | AGTRAP     | 0.440742558 |
| ILMN_2319994 | RPL3       | 0.440723986 |
| ILMN_1742191 | TUBA1A     | 0.440704045 |
| ILMN_1910180 | AXO24680   | 0.440686781 |
| ILMN_2394027 | CLK3       | 0.440384975 |
| ILMN_3272768 | HSPCL157   | 0.440357494 |
| ILMN_1788019 | LAMA2      | 0.440354805 |
| ILMN_2048471 | NCR3       | 0.440213969 |
| ILMN_2290950 | APORCECF3F | 0.440147559 |
| ILMN_1712636 | NVL        | 0.440027379 |
| ILMN_1715131 | CCR7       | 0.440022458 |
| ILMN_1758798 | NPIPL2     | 0.43997324  |
| ILMN_1741259 | RPS2       | 0.439900787 |
| ILMN_2625404 | NUCKS1     | 0.439817826 |
| ILMN_1742923 | ZNF584     | 0.439729521 |
| ILMN_1703041 | IDUA       | 0.439644113 |
| ILMN_1773247 | ZNF410     | 0.439611929 |
| ILMN_2337492 | RCE1       | 0.439561788 |
| ILMN_1678831 | GC2C       | 0.439539153 |
| ILMN_1868937 | BADAM1     | 0.43946141  |
| ILMN_1661695 | IRAK3      | 0.439436439 |
| ILMN_1690561 | GZMM       | 0.439360197 |
| ILMN_1705301 | TEAD4      | 0.439327991 |
| ILMN_1731287 | ARFGAP3    | 0.439237345 |
| ILMN_1699704 | STYX       | 0.439073528 |
| ILMN_1666976 | FLD3       | 0.43906753  |
| ILMN_1756982 | CLIC1      | 0.439011307 |
| ILMN_1727809 | STK35      | 0.438945902 |
| ILMN_1763436 | SETX       | 0.438910946 |
| ILMN_3188110 | C19orf60   | 0.438860125 |
| ILMN_1709851 | TCLE1      | 0.438809449 |
| ILMN_1710738 | RCH2       | 0.438778357 |
| ILMN_1661309 | XKR4       | 0.438724162 |
| ILMN_1651262 | HNRNPAB    | 0.438683534 |
| ILMN_1783226 | SSR2       | 0.438614591 |
| ILMN_1684271 | ACBD6      | 0.438564354 |
| ILMN_2347195 | NCRN000152 | 0.438539324 |
| ILMN_1687805 | RPS12      | 0.438536206 |
| ILMN_3278548 | RPL7       | 0.438477083 |
| ILMN_2170813 | LAMP3      | 0.438456337 |
| ILMN_1789909 | TBC1D9B    | 0.438401891 |
| ILMN_1746257 | DAZAP1     | 0.438396615 |
| ILMN_1749070 | HLA-DPB1   | 0.438265341 |
| ILMN_2378654 | BISGALTS   | 0.438170164 |
| ILMN_1675092 | VLDLR      | 0.438115105 |
| ILMN_1744665 | EP300      | 0.438108108 |
| ILMN_1666111 | YTHDC1     | 0.437960882 |
| ILMN_1750373 | KAL1       | 0.437924096 |
| ILMN_1656720 | PTPN11     | 0.437829648 |
| ILMN_1660663 | DYRK1A     | 0.437659546 |
| ILMN_1700727 | KLIF6      | 0.437583206 |
| ILMN_1706935 | CCDC136    | 0.437568793 |
| ILMN_2255579 | RAB37      | 0.437568017 |
| ILMN_1676385 | PAK2       | 0.437545748 |
| ILMN_2338785 | RPS14      | 0.437514057 |
| ILMN_2243618 | SAMD3      | 0.437514516 |
| ILMN_1719641 | SMOC2      | 0.437357824 |
| ILMN_3241051 | RPL32      | 0.437285546 |
| ILMN_2403965 | TXNDC5     | 0.437242243 |
| ILMN_2377150 | WHD01      | 0.437233028 |
| ILMN_1750920 | ADAM15     | 0.437167031 |
| ILMN_1688848 | TMEM44     | 0.437129062 |
| ILMN_1781276 | TMCO4      | 0.437123259 |
| ILMN_1715203 | DNAH7      | 0.437032911 |
| ILMN_1782560 | CD86       | 0.437001422 |
| ILMN_2296776 | PTPRA      | 0.436996461 |
| ILMN_3245403 | RPL17      | 0.436975002 |
| ILMN_1803739 | RPGRP1     | 0.436679509 |
| ILMN_1658261 | MAPKBP1    | 0.43666893  |
| ILMN_1671291 | E1F3I      | 0.436649361 |
| ILMN_2361862 | VLDLR      | 0.43663067  |
| ILMN_3206830 | CCF6P3     | 0.436594794 |
| ILMN_1669523 | FOS        | 0.436533863 |
| ILMN_1702636 | TUBB6      | 0.436472465 |
| ILMN_1815682 | C3orf37    | 0.436433388 |
| ILMN_1739199 | WASH2P     | 0.436418022 |
| ILMN_3247223 | TPBG       | 0.436404394 |
| ILMN_1721022 | SHC1       | 0.436390444 |
| ILMN_1686097 | TOP2A      | 0.436388448 |
| ILMN_1792528 | RPS25      | 0.436333476 |
| ILMN_1790909 | NFE2L2     | 0.436308912 |
| ILMN_2219134 | RPS15      | 0.436300076 |
| ILMN_1661306 | RPL29      | 0.43617973  |
| ILMN_1756415 | SAMD8B     | 0.436117661 |
| ILMN_1788250 | LDOC1      | 0.436149373 |
| ILMN_1847308 | FAM168A    | 0.436139833 |
| ILMN_1769191 | GNAS       | 0.435990046 |
| ILMN_1749362 | CD28       | 0.435928943 |
| ILMN_1727041 | EVSR1      | 0.435853016 |
| ILMN_1786328 | DCAF12     | 0.435628654 |
| ILMN_3241446 | ODF3B      | 0.43563952  |
| ILMN_1749447 | RPS9       | 0.435522063 |
| ILMN_1815261 | POI4A      | 0.43525957  |
| ILMN_1813704 | KIAA1199   | 0.435052352 |
| ILMN_3244323 | HCG_20425  | 0.435036848 |
| ILMN_1731184 | MELK       | 0.435034043 |
| ILMN_1778121 | SLC2A6     | 0.434978267 |

|              |                |               |
|--------------|----------------|---------------|
| ILMN_3307954 | L3MBTL4        | -0.552558557  |
| ILMN_1779633 | PSMD6          | -0.552629026  |
| ILMN_2199676 | CEP152         | -0.552685218  |
| ILMN_1859665 | AWO29225       | -0.552695515  |
| ILMN_2207562 | APIAR          | -0.552754274  |
| ILMN_3283960 | BCD46381       | -0.552797991  |
| ILMN_1908274 | AW236020       | -0.553535285  |
| ILMN_1805147 | ACSM5          | -0.553621205  |
| ILMN_2267131 | MAGA1A11       | -0.553793353  |
| ILMN_1681884 | LCC100006049   | -0.553840886  |
| ILMN_1699011 | GTDC1          | -0.553961748  |
| ILMN_1789653 | PBLD           | -0.554030314  |
| ILMN_1726198 | CTS13          | -0.554138601  |
| ILMN_3228470 | NACAD          | -0.554285186  |
| ILMN_1915734 | DA722162       | -0.554321924  |
| ILMN_2161832 | WFS37A         | -0.554373533  |
| ILMN_1677197 | RARA           | -0.554685556  |
| ILMN_1758004 | ETFDH          | -0.554598268  |
| ILMN_1695193 | ANGPTL3        | -0.554634768  |
| ILMN_2283196 | ZSWIM3         | -0.554713922  |
| ILMN_1664071 | TNNT2          | -0.554717531  |
| ILMN_1744295 | CDKN2A         | -0.555026031  |
| ILMN_1733333 | CALML3         | -0.5552724    |
| ILMN_1690327 | CLCN5          | -0.555640746  |
| ILMN_1901774 | BFS13180       | -0.555713615  |
| ILMN_1686906 | TP53INP2       | -0.555893959  |
| ILMN_1745817 | NELL1          | -0.555941508  |
| ILMN_2172174 | PNP            | -0.555980855  |
| ILMN_2313434 | TCF1           | -0.556179767  |
| ILMN_1741695 | COL12A1        | -0.556231988  |
| ILMN_1712298 | ANKRD46        | -0.556550242  |
| ILMN_2379560 | CDC48          | -0.556701972  |
| ILMN_1687437 | CCDC57         | -0.5567071055 |
| ILMN_1905546 | AKO55145       | -0.557188201  |
| ILMN_2141259 | SPAG5          | -0.557205137  |
| ILMN_1831907 | AH35777        | -0.557244497  |
| ILMN_1882485 | CFSS2129       | -0.557291735  |
| ILMN_1787830 | BASE           | -0.557408852  |
| ILMN_1763749 | GUCY2A         | -0.557459136  |
| ILMN_1855966 | DR338170       | -0.558009544  |
| ILMN_1669666 | IGF2           | -0.558516768  |
| ILMN_1752646 | NA             | -0.558561984  |
| ILMN_2292646 | GAD1           | -0.558698733  |
| ILMN_1831258 | AKO94576       | -0.558762574  |
| ILMN_1761014 | CATHEB         | -0.558761704  |
| ILMN_1741431 | AOC2           | -0.558901333  |
| ILMN_2355033 | KIAA1147       | -0.559104308  |
| ILMN_2131811 | CLPS           | -0.559104551  |
| ILMN_1666257 | DKFZp434C00320 | -0.559390343  |
| ILMN_2183772 | CDC121         | -0.559431534  |
| ILMN_1774091 | FECH           | -0.559675342  |
| ILMN_1701512 | KIAA0391       | -0.55984236   |
| ILMN_2233552 | POLD3          | -0.55999496   |
| ILMN_3241607 | FLJ00326       | -0.560188167  |
| ILMN_2103774 | PIPSKL1        | -0.560198512  |
| ILMN_1671051 | CCDPE          | -0.560204024  |
| ILMN_1713219 | RGS12          | -0.560950865  |
| ILMN_1804150 | HIBADH         | -0.5609951746 |
| ILMN_1699684 | PBLD           | -0.561005416  |
| ILMN_1770172 | ZNF669         | -0.561078346  |
| ILMN_1813256 | CRPT           | -0.561351322  |
| ILMN_1781821 | TPD9           | -0.561539162  |
| ILMN_1848529 | AV231716       | -0.561078959  |
| ILMN_2059294 | RTCD1          | -0.562131782  |
| ILMN_1717757 | CALML4         | -0.562189019  |
| ILMN_1693270 | SUSD2          | -0.562442027  |
| ILMN_1791588 | STBR24         | -0.562714579  |
| ILMN_1681601 | SUCNR1         | -0.5627991    |
| ILMN_1654402 | IL18BP         | -0.5628914    |
| ILMN_1722849 | UNC13A         | -0.562923593  |
| ILMN_1698832 | AWA10744       | -0.562940772  |
| ILMN_1882015 | BG951912       | -0.563053232  |
| ILMN_2166543 | DNAJC6         | -0.563201663  |
| ILMN_1813993 | A792936        | -0.563273293  |
| ILMN_1695461 | PTPRA          | -0.563411263  |
| ILMN_3261022 | NA             | -0.563632812  |
| ILMN_1781104 | MAP2K7         | -0.564402786  |
| ILMN_2199439 | CA2            | -0.564821895  |
| ILMN_1761804 | ALDH9A1        | -0.564886886  |
| ILMN_1677043 | AKR1A2         | -0.564989509  |
| ILMN_1735996 | NOX4           | -0.565673777  |
| ILMN_3249663 | PCBP2          | -0.565719212  |
| ILMN_2259949 | BCKDHB         | -0.565763103  |
| ILMN_1729965 | CXorf66        | -0.5658798    |
| ILMN_3251497 | GSTR1          | -0.566046487  |
| ILMN_1669103 | AKO21896       | -0.5660762    |
| ILMN_3294965 | RRA52          | -0.566160978  |
| ILMN_2069224 | PVALB          | -0.566234664  |
| ILMN_1712786 | AHCYL2         | -0.566534571  |
| ILMN_1699334 | AATK           | -0.56671869   |
| ILMN_1738058 | CPN6B          | -0.567531379  |
| ILMN_1860789 | BM974067       | -0.567688597  |
| ILMN_1795704 | KIAA0232       | -0.567775564  |
| ILMN_1712231 | SH3YL1         | -0.567977311  |
| ILMN_1672354 | AXT21218       | -0.568260913  |
| ILMN_1807448 | FAM8A1         | -0.5682898    |
| ILMN_3310281 | MIRLET7E       | -0.568384061  |
| ILMN_1777031 | PXLR           | -0.56864097   |

ILMN\_1728262 SAA2 0.434893422  
ILMN\_1722900 EFA41 0.434796794  
ILMN\_1790962 RNL 0.434709567  
ILMN\_1688002 DTX1 0.434707869  
ILMN\_1811775 CCDC102 0.434595908  
ILMN\_1665515 NCRNA00152 0.434564013  
ILMN\_1750100 TUBB8 0.434471956  
ILMN\_1734895 SFT2D1 0.434410172  
ILMN\_2328835 IPK2C 0.434393725  
ILMN\_1811593 NPALL1 0.434362344  
ILMN\_1711208 CELSR2 0.434253209  
ILMN\_1657153 ACTR3 0.43424429  
ILMN\_1696380 GHRL 0.434132412  
ILMN\_1652464 TUBA3E 0.434126098  
ILMN\_1704515 RPL27A 0.434064488  
ILMN\_2302497 CSF1 0.434053591  
ILMN\_2247594 RPLP1 0.433988142  
ILMN\_1734964 P2RX5 0.433911022  
ILMN\_2209260 KRTP1-3 0.433887065  
ILMN\_1741148 ALDOA 0.433878961  
ILMN\_1763640 NCKAP5L 0.433826092  
ILMN\_1707810 RPS5 0.433754912  
ILMN\_1806757 MYBBP1A 0.433658048  
ILMN\_1717207 MMP25 0.433652197  
ILMN\_1651209 SLC35E2 0.433640606  
ILMN\_1658920 MCTP1 0.433602381  
ILMN\_1655129 TEX1D 0.433552605  
ILMN\_3220952 ANKRD36 0.433515574  
ILMN\_2349696 CNH2 0.4334979  
ILMN\_1797451 SRGAP2P2 0.43349389  
ILMN\_1736500 GNB2L1 0.433345035  
ILMN\_1812626 TGFBR2 0.433231771  
ILMN\_3221499 ZNF735 0.433245846  
ILMN\_1737036 GGT7 0.433229757  
ILMN\_1708093 ARHGEP5 0.433163176  
ILMN\_2350801 SLC25A29 0.433157881  
ILMN\_1742260 SFA2 0.433147972  
ILMN\_1738027 BRCA1 0.4331347621  
ILMN\_1654065 ATOMB 0.433135866  
ILMN\_1803813 ATE1 0.433126479  
ILMN\_1685830 SLC7A2 0.433057722  
ILMN\_1776327 BMOOR292 0.433001133  
ILMN\_1814917 TLE2 0.432928277  
ILMN\_1661599 DDIT4 0.432905003  
ILMN\_2290405 BNP2X 0.432829215  
ILMN\_1809818 PRCC 0.432804045  
ILMN\_1763603 FAM177A1 0.43279007  
ILMN\_1662256 PARR6 0.432770912  
ILMN\_1699708 AFB3 0.432657448  
ILMN\_1666376 RPL13A 0.432643895  
ILMN\_1665390 SPOY7P 0.432510749  
ILMN\_1651316 CD69 0.432466028  
ILMN\_2140389 TMEM185A 0.432445374  
ILMN\_3259751 C14orf56 0.432438185  
ILMN\_2319077 FAS 0.432417806  
ILMN\_2209155 SNOIR056 0.432402465  
ILMN\_1688749 RPS2 0.432397069  
ILMN\_1759359 BIT3L4 0.432376921  
ILMN\_2206716 JTB 0.432310808  
ILMN\_3193623 RPL17 0.432289812  
ILMN\_1775522 MAGE01 0.432257815  
ILMN\_1753890 IFT20 0.432241374  
ILMN\_1793559 C6orf004 0.432166325  
ILMN\_2391912 SEC14L1 0.432065133  
ILMN\_1693430 NME1 0.432006868  
ILMN\_3238203 LOC349114 0.431987317  
ILMN\_1780940 PRR2P5D 0.431891593  
ILMN\_3240419 FLJ14186 0.431726913  
ILMN\_1815039 RRP36 0.431512793  
ILMN\_1696911 FTH1 0.431465211  
ILMN\_2135798 NR2C2AP 0.431339862  
ILMN\_1722774 VPS27 0.431312924  
ILMN\_1763000 ADAP2 0.431275572  
ILMN\_1696846 SATB1 0.431250526  
ILMN\_1750563 CERCAM 0.431188455  
ILMN\_2377025 TCOF1 0.431125379  
ILMN\_1710710 DEDD 0.431119455  
ILMN\_1798256 UPP1 0.430915581  
ILMN\_1813840 KDM1A 0.430866815  
ILMN\_1659744 PRMT1 0.430847423  
ILMN\_1715926 RPL32 0.430804403  
ILMN\_1771957 MAN1B1 0.430756659  
ILMN\_1719611 CTFP3 0.430706024  
ILMN\_1690125 POLM7 0.430654628  
ILMN\_1688433 COL8A1 0.43049892  
ILMN\_1680267 C10orf90 0.430381101  
ILMN\_1761442 WDR24 0.430309104  
ILMN\_1790149 HGF 0.430300026  
ILMN\_1697499 HLA-DRB1 0.430263778  
ILMN\_2408576 FAM129B 0.430195674  
ILMN\_3238481 SNOIR060 0.430179272  
ILMN\_2328224 MADD 0.430028095  
ILMN\_1766914 MFAP4 0.429990139  
ILMN\_3279306 RPL17 0.42991776  
ILMN\_1770822 RPS6KA3 0.429913416  
ILMN\_1652327 CBR3 0.429843139  
ILMN\_1656068 NPPL3 0.429805073  
ILMN\_1733863 FAM100A 0.429707907

ILMN\_1809259 HRASL2 -0.568766501  
ILMN\_1670817 GRPEL1 -0.568775132  
ILMN\_1781941 APOM -0.568809948  
ILMN\_1651310 MLLT4 -0.568847737  
ILMN\_3239568 MYLK4 -0.568832433  
ILMN\_2177234 DEF8104B -0.56913169  
ILMN\_1659086 DQB95884 -0.569460565  
ILMN\_1808262 DRBK3 -0.569851249  
ILMN\_1716803 RALYL -0.569899854  
ILMN\_1759576 SFYK2 -0.570051332  
ILMN\_1719498 EPHX4 -0.570304644  
ILMN\_1770245 EPB41L5 -0.570417562  
ILMN\_1701831 GSTA1 -0.570452279  
ILMN\_2402463 SHMT1 -0.570963318  
ILMN\_3243519 LOC390858 -0.571006999  
ILMN\_3249383 FIGL2 -0.571047564  
ILMN\_1759973 NDUFA5 -0.571117263  
ILMN\_1707548 RAD18 -0.571605885  
ILMN\_1781560 ST3GAL6 -0.571634856  
ILMN\_2382998 ZCCHC16 -0.572075759  
ILMN\_1723763 RDM1 -0.572179886  
ILMN\_1759386 NNT -0.572264827  
ILMN\_1695092 WRB -0.572960761  
ILMN\_1803882 VEGFA -0.573094531  
ILMN\_1776334 UXS1 -0.57309988  
ILMN\_2390609 ANK3 -0.573137143  
ILMN\_1694359 UPR9B39 -0.573331975  
ILMN\_1805404 GRIN1 -0.573400877  
ILMN\_1792744 SLC13A2 -0.573500513  
ILMN\_1753502 IGSF11 -0.573604665  
ILMN\_1709768 LOC100128818 -0.573626926  
ILMN\_1770466 ATP5G3 -0.573763136  
ILMN\_2323056 FCFA87 -0.574103941  
ILMN\_2331232 TNFRSF6B -0.574125462  
ILMN\_1737588 C21orf33 -0.574661627  
ILMN\_2397841 SNCB -0.574741402  
ILMN\_1850574 BSG43031 -0.574812741  
ILMN\_1897590 NA -0.574888313  
ILMN\_2070792 ACSM5 -0.574929299  
ILMN\_1781472 CDC428PA -0.57511068  
ILMN\_1808305 RTCD1 -0.575144348  
ILMN\_1808487 PLA2G12B -0.575228473  
ILMN\_1672605 C7orf41 -0.575345032  
ILMN\_3201715 NA -0.575848174  
ILMN\_1689129 DRRM1 -0.575937173  
ILMN\_1675365 LARP4 -0.576044483  
ILMN\_1721680 LOC644075 -0.57638841  
ILMN\_1830259 AIG30821 -0.576395461  
ILMN\_1776493 MTP51 -0.576456836  
ILMN\_1707592 RGN -0.576506217  
ILMN\_1696675 CES2 -0.576677274  
ILMN\_2174215 DIRAS3 -0.576794541  
ILMN\_1771084 ACSM3 -0.577076248  
ILMN\_1661491 SH3GL2 -0.577090851  
ILMN\_3182171 FGGY -0.577286026  
ILMN\_1760760 CARG2 -0.577340997  
ILMN\_1735445 SLC7A9 -0.577619449  
ILMN\_2117526 DMGDH -0.577800436  
ILMN\_1813296 RDH8 -0.577811541  
ILMN\_2351241 RNF14 -0.578028958  
ILMN\_1780625 HR -0.578099283  
ILMN\_1804814 C6orf130 -0.578296069  
ILMN\_1903568 CR25988 -0.578319639  
ILMN\_1907705 BM717102 -0.578401221  
ILMN\_1693645 DRY19L2P4 -0.578434091  
ILMN\_1707464 MST1 -0.578654819  
ILMN\_1829989 LOC20930 -0.579187555  
ILMN\_1773835 ZNF5958 -0.579333754  
ILMN\_1788131 CYP26A1 -0.579394004  
ILMN\_1849726 AAS20513 -0.579403193  
ILMN\_1853631 BX115738 -0.579591127  
ILMN\_1706579 SHBG -0.579690441  
ILMN\_2386288 ADK -0.579819384  
ILMN\_1728938 TM68B -0.579898352  
ILMN\_1767590 TSPY3 -0.579981857  
ILMN\_1669123 AK125437 -0.580029339  
ILMN\_2188959 ACO27 -0.580177873  
ILMN\_3261111 IP6K3 -0.580525736  
ILMN\_1773742 DNAJB9 -0.580584257  
ILMN\_2117853 DAGDH -0.580704733  
ILMN\_1861652 BQ575680 -0.580888002  
ILMN\_1712088 CLVL -0.581184242  
ILMN\_3251346 NOX4 -0.58142813  
ILMN\_2284077 SLC38A8 -0.581757471  
ILMN\_1650289 CCR2 -0.582121948  
ILMN\_1694106 GPD1L -0.582285339  
ILMN\_1787751 ABS29228 -0.582431117  
ILMN\_2121816 GPR137B -0.582622069  
ILMN\_1667263 BMS1P5 -0.583316955  
ILMN\_174742 MTP7 -0.583443334  
ILMN\_1749927 ICF5 -0.583566409  
ILMN\_2284810 CIDEA -0.583596534  
ILMN\_1776724 LYPD6 -0.583734681  
ILMN\_2380181 MAG -0.583803339  
ILMN\_1811278 RNF186 -0.583910224  
ILMN\_1887508 AIZ06543 -0.584135783  
ILMN\_2045729 WDR12 -0.584383024  
ILMN\_1676042 NA -0.584402043

ILMN\_2273331 CCDC46 0.429696614  
ILMN\_1801130 STOML1 0.429648568  
ILMN\_2339627 COPE 0.429587859  
ILMN\_2067656 CND2 0.429578218  
ILMN\_2337655 WARS 0.429530509  
ILMN\_1774828 VEZT 0.42924749  
ILMN\_1760374 CDBA 0.429227115  
ILMN\_1801105 PRKCD 0.429225326  
ILMN\_2335176 C2orf89 0.429203682  
ILMN\_2324672 USF2 0.429170824  
ILMN\_1723177 ANAPCS 0.429143285  
ILMN\_1768973 HIST2H2AC 0.42913053  
ILMN\_3195253 RPL7 0.429062095  
ILMN\_3241870 FRMD8 0.42904272  
ILMN\_1795424 SNK21 0.428941526  
ILMN\_1715804 PTPN7A 0.428893087  
ILMN\_2059744 IL7 0.428793083  
ILMN\_2400512 PRKCSH 0.428773642  
ILMN\_1712545 S100A3 0.428752501  
ILMN\_2364529 EDH2 0.428741256  
ILMN\_1791057 IRNAR2 0.428620256  
ILMN\_2115633 CD320 0.428578666  
ILMN\_2272270 COL4A3 0.428553128  
ILMN\_1787718 SLC27A1 0.428469876  
ILMN\_3238196 CYTH4 0.428466959  
ILMN\_169426 ROR2 0.428379288  
ILMN\_1718633 LRP5L 0.428343106  
ILMN\_1782829 GLTSCR1 0.428233018  
ILMN\_1755883 RPS27A 0.428222766  
ILMN\_2163070 KHCDC1 0.428193025  
ILMN\_2394250 PLEKHA1 0.428149307  
ILMN\_3227912 RPL15 0.42810414  
ILMN\_1815057 POGZFB 0.428074657  
ILMN\_1675956 LYST 0.427926132  
ILMN\_1684571 RSPH1 0.427918178  
ILMN\_1669584 ILF3 0.427754339  
ILMN\_1723156 PTPRA 0.427700133  
ILMN\_2244953 PLRA 0.427675837  
ILMN\_1715724 LPT1 0.427606855  
ILMN\_2331501 UBC 0.427565674  
ILMN\_1815874 NANS 0.427552724  
ILMN\_3236169 MACC1 0.427508463  
ILMN\_1746720 TTC39C 0.427478166  
ILMN\_2133638 CTNND1P1 0.427464831  
ILMN\_1781281 BDI1 0.427305036  
ILMN\_1709044 TGIF2 0.427297779  
ILMN\_1660810 TTC17 0.427296245  
ILMN\_1730294 INO80C 0.427255201  
ILMN\_2365621 RBBP8 0.427253636  
ILMN\_1791384 JAK1 0.427218667  
ILMN\_1689590 GLYCL3A3 0.427173588  
ILMN\_2109708 TYMP 0.427128714  
ILMN\_2297824 UBE2G2 0.427064118  
ILMN\_1745223 CDC42EP4 0.426993841  
ILMN\_3205289 GOLGA8G 0.426939799  
ILMN\_1656016 DHOX 0.426903262  
ILMN\_1802025 RHOB 0.426860419  
ILMN\_1653165 AAMP 0.426765664  
ILMN\_1757978 INO80D 0.426744926  
ILMN\_1709860 UNC45A 0.426663437  
ILMN\_1684051 WASF2 0.426665957  
ILMN\_1768408 TERF2 0.426604826  
ILMN\_1656129 SLC39A10 0.426597891  
ILMN\_2321064 BAX 0.426591967  
ILMN\_2378048 HNRNPK 0.426568604  
ILMN\_1808657 FMO3 0.426548244  
ILMN\_2307060 RPL4 0.426469043  
ILMN\_1713394 RPS16 0.426405039  
ILMN\_1795933 CHMP7 0.426389068  
ILMN\_1659752 AIDA 0.426373826  
ILMN\_3247578 FAT1 0.426359163  
ILMN\_1765801 GAA 0.426358414  
ILMN\_1758214 RARS2 0.426337458  
ILMN\_1703288 C19orf16 0.426312061  
ILMN\_1779795 BMS1P4 0.426238596  
ILMN\_1810922 PCNT 0.426238467  
ILMN\_2411723 RPSA 0.426190643  
ILMN\_1811364 CDS56913 0.426076709  
ILMN\_1663925 OR2L5 0.426016664  
ILMN\_2395959 UBN1 0.426015018  
ILMN\_1690035 FLYWCH1 0.426002684  
ILMN\_1730705 C19orf61 0.4258819  
ILMN\_1713636 S100A6 0.425766244  
ILMN\_1655710 RPS25 0.425764229  
ILMN\_1651507 PPRDND1 0.425763811  
ILMN\_1764613 ORS2L8 0.425721556  
ILMN\_3231621 LOC349114 0.42558267  
ILMN\_2414007 NME1 0.425531862  
ILMN\_1778319 DMKN 0.425478152  
ILMN\_1746138 RLTPR 0.425469782  
ILMN\_2345173 sPpRns 0.425468171  
ILMN\_1683824 ANO7 0.425332957  
ILMN\_1727574 ZNF827 0.425274747  
ILMN\_1663618 STA3 0.425197188  
ILMN\_2380163 PTPRF 0.425147105  
ILMN\_1667453 HNPFP 0.425084874  
ILMN\_1708151 LAGE3 0.425050772  
ILMN\_2101276 RDS18 0.424934702

ILMN\_1685796 CSD1 0.584552858  
ILMN\_3240173 MTSS1L 0.584630817  
ILMN\_1672800 RASA4 0.58477931  
ILMN\_1776661 ORAF5 0.585185162  
ILMN\_1703475 CLSPN 0.586658479  
ILMN\_2150019 SUCLA2 0.58705234  
ILMN\_1892573 BC031234 0.587416371  
ILMN\_1754491 IYD 0.58747539  
ILMN\_1651604 MARPK4 0.587539805  
ILMN\_1652417 LRPRC 0.587595287  
ILMN\_1657682 GFM1 0.587909839  
ILMN\_1727438 KCND3 0.588124252  
ILMN\_1770663 KRT24 0.588468622  
ILMN\_1686152 GGA2 0.588508308  
ILMN\_1654151 CDKAC 0.58882025  
ILMN\_1774757 ZNF906 0.588938263  
ILMN\_2053679 ACADM 0.588989762  
ILMN\_1688220 SYNPO2 0.589304154  
ILMN\_1662091 FLJ43860 0.589372997  
ILMN\_1720889 SCAMOL 0.590261238  
ILMN\_3247438 C19orf69 0.590553673  
ILMN\_1767474 HAD2 0.590913188  
ILMN\_1739429 HSSG2 0.591133663  
ILMN\_3200885 TNFRSF14 0.591159023  
ILMN\_1718520 RNL5 0.591213071  
ILMN\_1801403 DCUN1D4 0.591388141  
ILMN\_1652007 UPP2 0.591463807  
ILMN\_1702858 ADHFE1 0.591888712  
ILMN\_1826853 NA 0.592409393  
ILMN\_3232366 SDHC 0.592495126  
ILMN\_3241953 AZL1D1 0.592562539  
ILMN\_1684592 C1orf95 0.592741202  
ILMN\_1740244 LYRM4 0.592979222  
ILMN\_1685854 C5orfE3 0.592829006  
ILMN\_1656145 GOT1 0.592892974  
ILMN\_1661994 ESRG 0.593104016  
ILMN\_1720617 DR2T6 0.593177961  
ILMN\_1651967 TP53I3 0.593472646  
ILMN\_2080885 ALDH4A1 0.595146267  
ILMN\_1803673 LOC113230 0.595260122  
ILMN\_1748233 CXCL14 0.59558514  
ILMN\_1751943 MME 0.595606499  
ILMN\_3305768 GSTA7P 0.596797544  
ILMN\_1915913 B672090 0.596979535  
ILMN\_1806569 PCM1 0.596979454  
ILMN\_1778357 DNMT3L 0.597271234  
ILMN\_1700549 ERLIN2 0.597481448  
ILMN\_1799293 MINA53 0.597514518  
ILMN\_1686573 DEF81 0.597906817  
ILMN\_1769661 TBCA 0.597979057  
ILMN\_1750800 KCC1 0.598282703  
ILMN\_1874770 DA691010 0.598586086  
ILMN\_1661399 ARL4A 0.59888559  
ILMN\_1811880 SLC34A3 0.599313836  
ILMN\_2207504 LEP 0.599498868  
ILMN\_1674021 LOC01321 0.599513951  
ILMN\_1783645 DKFZ666P158 0.599842435  
ILMN\_1746426 TOMM70A 0.599914099  
ILMN\_1794890 SLC38A4 0.600327923  
ILMN\_3290715 COL6A4P2 0.600615208  
ILMN\_1766896 ZDHHC19 0.600771378  
ILMN\_1666939 MEI1 0.60082162  
ILMN\_1718001 PHKB 0.60084729  
ILMN\_2151739 CAT 0.60151176  
ILMN\_1674098 SORBS2 0.602113565  
ILMN\_1728883 ABO74415 0.602241567  
ILMN\_3298377 FLJ0278 0.602149441  
ILMN\_2363544 ADHFE1 0.602664293  
ILMN\_1832155 DCUN1D5 0.602887631  
ILMN\_1800874 MRO 0.603093202  
ILMN\_2184049 COX7B 0.603248473  
ILMN\_1739925 SLC28A1 0.603834799  
ILMN\_1742040 GDPD4 0.603982854  
ILMN\_1690621 GPR98 0.604467609  
ILMN\_1757693 C17orfE5 0.605284391  
ILMN\_3187741 IGLON5 0.605466215  
ILMN\_1843198 AK4 0.606145197  
ILMN\_2058347 NTFSDC1 0.606245016  
ILMN\_1685886 MAPK4 0.607198422  
ILMN\_3123886 NOK4 0.607521093  
ILMN\_2344204 PRR13 0.607564895  
ILMN\_1770725 AIF1L 0.608129893  
ILMN\_2341548 MYO5B 0.608930064  
ILMN\_1794875 AGPAT9 0.609030517  
ILMN\_1891311 A474482 0.609121061  
ILMN\_2113470 GSTA1 0.609282488  
ILMN\_1771061 BRD4 0.610112796  
ILMN\_1815570 HOKA6 0.610290947  
ILMN\_1670385 TUBAL3 0.611274609  
ILMN\_2276461 MAP2 0.611430482  
ILMN\_1680612 SLC6A13 0.611441605  
ILMN\_1895251 MGC26484 0.611747185  
ILMN\_1810604 ELMOD1 0.612119237  
ILMN\_1761058 NPHP3-ACAD11 0.612238313  
ILMN\_1760110 AKO23936 0.612625894  
ILMN\_1733807 IGF2BP1 0.612764778  
ILMN\_1763878 CDAC1 0.613398032  
ILMN\_1668617 GRB10 0.614259593



ILMN\_2397199 NDEL1 0.424904033  
ILMN\_1659610 T1P3 0.424892577  
ILMN\_2053546 RPL19 0.424857176  
ILMN\_1761567 TSC2D1 0.424844354  
ILMN\_2328952 CLCC1 0.424760419  
ILMN\_1750181 TESC 0.424720123  
ILMN\_1726783 RNASEH1 0.424708853  
ILMN\_1777487 ZNF839 0.424695299  
ILMN\_1764723 SHP99D2B 0.424689495  
ILMN\_2331121 FCSR1B 0.424661449  
ILMN\_1708936 EKOXC3 0.424658838  
ILMN\_1657554 TSPYL2 0.424637287  
ILMN\_3217815 RPS2 0.424588448  
ILMN\_2350634 EFEMP1 0.424541232  
ILMN\_1716608 NCF 0.424487788  
ILMN\_1890263 BW101040 0.424456008  
ILMN\_1759787 THBD 0.424229009  
ILMN\_2148785 GBP1 0.424083849  
ILMN\_1653861 SCMH1 0.424076146  
ILMN\_1701832 RPL19 0.424027863  
ILMN\_1723017 LOC728643 0.423972063  
ILMN\_2409055 FAM13C 0.423894969  
ILMN\_1652313 RNF215 0.423867072  
ILMN\_3242466 NA 0.423819712  
ILMN\_1760314 CCDC8 0.423793373  
ILMN\_1670204 RRM15B 0.423757017  
ILMN\_1655838 FAM198A 0.423676241  
ILMN\_1660786 HPK1 0.423675704  
ILMN\_1684183 RAD9A 0.423662027  
ILMN\_1677589 hCG\_1818547 0.423642917  
ILMN\_1686626 DDX39B 0.423605392  
ILMN\_1724250 GRN 0.423604333  
ILMN\_1715189 LHX6 0.423580861  
ILMN\_1660281 CLN3 0.423475104  
ILMN\_1656882 abParts 0.423433397  
ILMN\_1751726 RPLP0 0.423365384  
ILMN\_1748105 DDB1 0.423341188  
ILMN\_1701629 ALJ37589 0.423300499  
ILMN\_1651378 AUP1 0.423286479  
ILMN\_1666208 MSL1BBP1 0.42325709  
ILMN\_2397028 SERPINB8 0.423189851  
ILMN\_1722537 FLJ40504 0.423143589  
ILMN\_1737599 TRIM5 0.423002514  
ILMN\_1799017 DKR2 0.4229292  
ILMN\_1759773 ZNF273 0.422928712  
ILMN\_1814402 NFIC 0.42288822  
ILMN\_1779147 ENC1 0.422868928  
ILMN\_1663562 OR2A42 0.422799553  
ILMN\_2234873 NME1 0.422791379  
ILMN\_2400861 ZNF526 0.422748489  
ILMN\_1759757 KCSF2 0.422721248  
ILMN\_1779071 FEZ1 0.422708606  
ILMN\_1746276 EPC1 0.42264625  
ILMN\_1795119 MYH3 0.422559709  
ILMN\_1651504 FAM193A 0.422543939  
ILMN\_2395174 TRAK1 0.422375231  
ILMN\_2112417 PGAM1 0.422248673  
ILMN\_2109994 MIA-RAB4B 0.422229887  
ILMN\_1653514 RBBP4 0.422208446  
ILMN\_1712944 AES 0.42211953  
ILMN\_1774844 MAAKAPK2 0.421996988  
ILMN\_1699354 EPHA2 0.421980098  
ILMN\_1753584 KRTR 0.4219652  
ILMN\_1693604 GRM2 0.421932555  
ILMN\_1675626 PRPF38A 0.421919567  
ILMN\_1655167 ZNF502 0.421913878  
ILMN\_1784847 CREBZF 0.4219098  
ILMN\_2396571 GPR108 0.421898045  
ILMN\_1663113 TLL1L2 0.421821408  
ILMN\_1658283 RPL17 0.421811457  
ILMN\_1748797 GRB2 0.421796731  
ILMN\_1794442 ZNF469 0.421740778  
ILMN\_1778226 ETL3 0.421740471  
ILMN\_1781769 CCL1 0.421689567  
ILMN\_1692223 LCN2 0.421677716  
ILMN\_1911059 AV691356 0.421654664  
ILMN\_1766675 CDH6 0.421641599  
ILMN\_1674780 SF3B1 0.421565408  
ILMN\_2058782 IP27 0.421507941  
ILMN\_1686879 ATP2B4 0.421503116  
ILMN\_1669550 MAD2L2 0.421501  
ILMN\_1724145 CBX4 0.421495136  
ILMN\_1793959 ADPGK 0.421445031  
ILMN\_1789007 APOC1 0.421378915  
ILMN\_2103841 AP 0.421373411  
ILMN\_1708604 CE21 0.421272574  
ILMN\_1810467 PPP3R1A 0.421264781  
ILMN\_1699856 RALGDS 0.421239729  
ILMN\_1785646 PMP22 0.421239224  
ILMN\_2389013 ADRM1 0.421216356  
ILMN\_1765082 RBM10 0.421214803  
ILMN\_3246292 RPL23A 0.421211143  
ILMN\_1732060 ARHGAP1 0.421145743  
ILMN\_1716397 LAYN 0.421039469  
ILMN\_1721842 RYBP 0.421022343  
ILMN\_2215211 ZNF514 0.420992436  
ILMN\_1769757 C16orf104 0.420971567  
ILMN\_1764184 LGLALSRC 0.420795901

ILMN\_1748352 CTSL2 -0.615118619  
ILMN\_1782937 GSTA1 -0.616042056  
ILMN\_1663538 CLYBL -0.616277661  
ILMN\_2078074 HMT -0.61719372  
ILMN\_2124361 LEAP2 -0.617212148  
ILMN\_2322747 ARHGAP5 -0.617346894  
ILMN\_2211546 HAO1 -0.617356384  
ILMN\_1788895 SRD5A2 -0.618498355  
ILMN\_3245250 TSL1P8 -0.618681461  
ILMN\_1763156 WDR77 -0.618841599  
ILMN\_1837348 AIZ72125 -0.619584978  
ILMN\_1753729 KNG1 -0.619723113  
ILMN\_1769556 NPR3 -0.620165173  
ILMN\_1818856 BE549956 -0.621177174  
ILMN\_1730229 CGNL1 -0.621180739  
ILMN\_1701127 CCO21A -0.621193388  
ILMN\_1729281 SPHK2 -0.622073624  
ILMN\_1806310 ALCF -0.622389809  
ILMN\_1714384 PCCA -0.624288495  
ILMN\_1707775 ZNF257 -0.624374926  
ILMN\_1658640 DDIC25 -0.624959634  
ILMN\_1703174 FREM2 -0.625868265  
ILMN\_1767277 PLG1A -0.626729555  
ILMN\_1827736 PDK3 -0.626833401  
ILMN\_1815010 RNF141 -0.627416016  
ILMN\_1779241 CRYM -0.627549742  
ILMN\_1679720 SULT1C1P1 -0.627784801  
ILMN\_1824490 BGA18056 -0.627794004  
ILMN\_1759910 SERPINAS -0.629102664  
ILMN\_1831098 BXO92776 -0.629520577  
ILMN\_1713846 PPM1H -0.629628149  
ILMN\_1803938 NHS -0.629828905  
ILMN\_1720462 CEN01 -0.629959363  
ILMN\_1689156 MMAB -0.630108638  
ILMN\_1681437 DCXR -0.630178199  
ILMN\_1788122 GSTAS -0.631440444  
ILMN\_2166457 HPGD -0.63149439  
ILMN\_1700758 POLR1A -0.631708232  
ILMN\_1673503 CACNB4 -0.632409895  
ILMN\_1703678 DNMI1P33 -0.632470368  
ILMN\_1810200 ARPC2 -0.633362127  
ILMN\_1686405 KDR -0.633720646  
ILMN\_1731181 TEX2 -0.634143846  
ILMN\_3305614 ZNF812 -0.634374463  
ILMN\_2186588 C18orf32 -0.634453148  
ILMN\_1754501 C2orf74 -0.634764572  
ILMN\_3270542 UQCRRF51 -0.634847033  
ILMN\_1807339 HRG -0.635588876  
ILMN\_1897505 BXG48850 -0.636672263  
ILMN\_1734707 C15orf13 -0.636957482  
ILMN\_2057220 HRSF12 -0.637332227  
ILMN\_1803745 SUXO -0.638489655  
ILMN\_2054607 CYP4V2 -0.638561371  
ILMN\_1655613 GSTA2 -0.639125143  
ILMN\_3239925 LOC25845 -0.639608095  
ILMN\_3217660 ZNF838B -0.639838528  
ILMN\_1895897 BF514393 -0.640576254  
ILMN\_1662675 ADAM2 -0.642138861  
ILMN\_1737152 DAO -0.642324644  
ILMN\_1897333 BXO98521 -0.642553747  
ILMN\_1785218 MTCO12 -0.643883244  
ILMN\_1813214 HNS92010 -0.644024609  
ILMN\_1670542 AK2 -0.644510759  
ILMN\_1749162 DIO2 -0.644917834  
ILMN\_2343097 NCALD -0.645108495  
ILMN\_1741662 TMCS -0.646602162  
ILMN\_1704166 LNP1 -0.6472601  
ILMN\_1805024 RBBP3P -0.647276469  
ILMN\_1673980 LOC643669 -0.647385101  
ILMN\_1706441 UPK3B -0.649422153  
ILMN\_1688886 GPCS -0.649635694  
ILMN\_1763092 MCCD1 -0.650242118  
ILMN\_3251540 GSTA2 -0.651710351  
ILMN\_3307856 SLC14I2 -0.651738172  
ILMN\_1808379 PLCD4 -0.653267363  
ILMN\_1783497 PANK1 -0.65332673  
ILMN\_1685441 ASAP3 -0.653794881  
ILMN\_2316918 PANK1 -0.654167045  
ILMN\_1729482 KLR15 -0.654440701  
ILMN\_1738736 SNK1 -0.655070367  
ILMN\_2043809 PFKM -0.655791172  
ILMN\_1808457 TBX18 -0.656103841  
ILMN\_3246214 B3GNT1 -0.656269212  
ILMN\_1718619 TRIM11 -0.656550139  
ILMN\_1732615 FCRLB -0.657444509  
ILMN\_3204686 SLC16A6 -0.65908455  
ILMN\_1665033 NPR3 -0.65921345  
ILMN\_1812600 NA -0.659288916  
ILMN\_2168747 GSTA2 -0.659552028  
ILMN\_1670547 GRM1 -0.660564003  
ILMN\_1816218 LOC25845 -0.661460452  
ILMN\_1827211 U436D4 -0.662631303  
ILMN\_2285375 SORD -0.662790469  
ILMN\_1703346 CHRNE -0.664596815  
ILMN\_1891725 BX111675 -0.66514725  
ILMN\_1695991 COLQ -0.66572101  
ILMN\_1687392 HNK -0.6660383172  
ILMN\_1740418 CYP27B1 -0.672281957

|              |              |             |
|--------------|--------------|-------------|
| ILMN_1798808 | FOXH1        | 0.420698951 |
| ILMN_2364376 | ILK          | 0.420687364 |
| ILMN_2406501 | SOD2         | 0.420634617 |
| ILMN_1751793 | PCNXL2       | 0.420516025 |
| ILMN_2316278 | MAGED4B      | 0.420489464 |
| ILMN_3242016 | POTE1        | 0.420463941 |
| ILMN_2329171 | SPOYE1       | 0.420385725 |
| ILMN_1699598 | AP2M1        | 0.420370408 |
| ILMN_1809477 | CAHRHP1      | 0.420297319 |
| ILMN_1678005 | POMT2        | 0.420263232 |
| ILMN_2342066 | METRN1       | 0.420155165 |
| ILMN_1769195 | KIAA0378     | 0.419957221 |
| ILMN_1707612 | FIGF         | 0.419939856 |
| ILMN_1760890 | SEPN1        | 0.419910671 |
| ILMN_1691930 | CRAB         | 0.419850985 |
| ILMN_2413064 | STGGALNAC4   | 0.419867419 |
| ILMN_2402798 | AP2M1        | 0.419623905 |
| ILMN_1800302 | LRTM1        | 0.419490477 |
| ILMN_1669032 | PPIC         | 0.419425301 |
| ILMN_1699574 | NRP1         | 0.419403028 |
| ILMN_2367020 | SC16G        | 0.419331582 |
| ILMN_1698386 | NEK9         | 0.419311756 |
| ILMN_1744347 | DQB9S289     | 0.419242596 |
| ILMN_1916702 | LOC100505576 | 0.419222887 |
| ILMN_3241657 | TMEM204      | 0.419215253 |
| ILMN_1806733 | COL18A1      | 0.419142458 |
| ILMN_1740505 | SGMS1        | 0.419112981 |
| ILMN_1656521 | RRP7A        | 0.419128472 |
| ILMN_1651719 | MBTPS1       | 0.419031669 |
| ILMN_1789502 | GPC4         | 0.419028205 |
| ILMN_1683441 | NCAPD3       | 0.418966595 |
| ILMN_1698404 | A055561      | 0.418947946 |
| ILMN_1720819 | SPCS2        | 0.418902701 |
| ILMN_1748755 | KCND2        | 0.418845083 |
| ILMN_1811063 | RPL29        | 0.418839348 |
| ILMN_1803220 | PODNL1       | 0.418830551 |
| ILMN_1780898 | PRKCH        | 0.418827339 |
| ILMN_2117623 | PLXNC1       | 0.418780247 |
| ILMN_2348503 | PPE          | 0.418737654 |
| ILMN_1706706 | WDR68        | 0.418730061 |
| ILMN_1759915 | ARPC1A       | 0.418698    |
| ILMN_2188451 | HIST1H2AH    | 0.41855239  |
| ILMN_1741406 | HOOK1        | 0.418381793 |
| ILMN_1846771 | BU521176     | 0.418359696 |
| ILMN_1686261 | TOM1L2       | 0.418336096 |
| ILMN_1684897 | SPOYE1       | 0.41815769  |
| ILMN_1787815 | TRIB3        | 0.418114203 |
| ILMN_2402168 | EXOSC10      | 0.418107404 |
| ILMN_215434  | RAB32        | 0.41808058  |
| ILMN_1674874 | MFSO10       | 0.418014984 |
| ILMN_3192791 | HNRNP41      | 0.418012196 |
| ILMN_3236373 | MSL2         | 0.417993974 |
| ILMN_1703487 | LMO4         | 0.41791432  |
| ILMN_2291954 | SLA          | 0.417890391 |
| ILMN_2165723 | KRT7         | 0.41776627  |
| ILMN_1615083 | WHSC2        | 0.417675599 |
| ILMN_3287687 | TUBB2A       | 0.417624834 |
| ILMN_1819494 | NA           | 0.417611222 |
| ILMN_1792710 | DAPK3        | 0.417582402 |
| ILMN_1736256 | CALR         | 0.417461004 |
| ILMN_1800897 | NRD1         | 0.417330641 |
| ILMN_2364521 | ANL          | 0.417330213 |
| ILMN_1762787 | RNF26        | 0.417244756 |
| ILMN_1802646 | EPHB6        | 0.417240547 |
| ILMN_2322972 | ZFYVE27      | 0.417199223 |
| ILMN_1898771 | TCRA         | 0.41710118  |
| ILMN_3235254 | SPOYEBP      | 0.417092391 |
| ILMN_2191759 | HNRNP41      | 0.417074925 |
| ILMN_3282245 | NA           | 0.417016807 |
| ILMN_2411897 | KLF10        | 0.417010648 |
| ILMN_1682428 | HENMT1       | 0.416961959 |
| ILMN_1718044 | ELAC2        | 0.416862887 |
| ILMN_2302654 | LRP8         | 0.416862642 |
| ILMN_1655068 | TOM1L2       | 0.416748006 |
| ILMN_1705763 | SCT          | 0.41669961  |
| ILMN_2110829 | RPL23A       | 0.416529212 |
| ILMN_2396875 | IGFBP3       | 0.416456144 |
| ILMN_3287068 | LAMR1P15     | 0.416433029 |
| ILMN_1790951 | C19orf50     | 0.416433006 |
| ILMN_1700959 | TRIM22       | 0.416356571 |
| ILMN_2338116 | TRAF5        | 0.416322532 |
| ILMN_170281  | ERC1         | 0.416243995 |
| ILMN_1773497 | UCMA         | 0.416036571 |
| ILMN_2210581 | B3GAT3       | 0.416009382 |
| ILMN_1775512 | AR4MI        | 0.415889712 |
| ILMN_1754580 | RNF40D1      | 0.415877364 |
| ILMN_2154950 | ZNF423       | 0.415862463 |
| ILMN_3233787 | SRRM1        | 0.415784482 |
| ILMN_1738684 | NRXN2        | 0.415682932 |
| ILMN_3234831 | RPL17        | 0.415663191 |
| ILMN_2185866 | PCHMB17      | 0.415578577 |
| ILMN_1656011 | RGS1         | 0.415497116 |
| ILMN_1799819 | MARS         | 0.415462305 |
| ILMN_1775708 | SLC2A3       | 0.415451314 |
| ILMN_2432261 | CXorf40B     | 0.415402806 |
| ILMN_1766185 | AXIN1        | 0.415401135 |
| ILMN_2385178 | MIB2         | 0.415377485 |
| ILMN_3233753 | AK293020     | 0.415368026 |

|              |           |              |
|--------------|-----------|--------------|
| ILMN_1763975 | NCRNA0083 | -0.673116154 |
| ILMN_1690733 | EGF       | -0.67440008  |
| ILMN_1753877 | MYADM12   | -0.675902758 |
| ILMN_1602517 | SOND      | -0.685948045 |
| ILMN_1815949 | SLC24A4   | -0.686388229 |
| ILMN_1709247 | PPP2R1B   | -0.687951674 |
| ILMN_1881598 | AWA51118  | -0.688893178 |
| ILMN_1878728 | DB222718  | -0.690402521 |
| ILMN_1736077 | LIAS      | -0.691197766 |
| ILMN_2198239 | HGD       | -0.691320158 |
| ILMN_1773262 | ESM1      | -0.693815511 |
| ILMN_2352609 | OGG1      | -0.693992252 |
| ILMN_1826572 | AKO94562  | -0.695140014 |
| ILMN_1790036 | C2orf202  | -0.697173494 |
| ILMN_1712430 | ATP5G1    | -0.700285025 |
| ILMN_2212878 | ESM1      | -0.702050931 |
| ILMN_1685703 | ACOX2     | -0.707345597 |
| ILMN_2193936 | HRG       | -0.711993441 |
| ILMN_1719468 | EFM2A     | -0.713587976 |
| ILMN_1678965 | FABP1     | -0.71591851  |
| ILMN_1684585 | ACSL1     | -0.716298112 |
| ILMN_2376133 | KIAA1191  | -0.716380563 |
| ILMN_2227817 | GSTA3     | -0.71678987  |
| ILMN_1773073 | PHYH      | -0.716860112 |
| ILMN_1810324 | SGCB      | -0.721013784 |
| ILMN_3235803 | ACQ7P3    | -0.72766752  |
| ILMN_1728467 | GHTM      | -0.727930358 |
| ILMN_1800049 | MAPT      | -0.736598213 |
| ILMN_2050911 | SLC22A4   | -0.736910448 |
| ILMN_1682062 | RVR1      | -0.739442417 |

ILMN\_2316540 MRPL11 0.415345423  
ILMN\_2139740 ZNF503 0.415323444  
ILMN\_1653438 PNF14 0.415317609  
ILMN\_1701875 ZFX 0.415310054  
ILMN\_2319996 RPL3 0.415259722  
ILMN\_1745469 SEC24B 0.415253462  
ILMN\_1761068 DKFZg434k132.0 0.415241285  
ILMN\_2372922 PPP2R4 0.41521036  
ILMN\_1799120 WDFC2 0.415124526  
ILMN\_1754746 CCNB3 0.415116689  
ILMN\_1678087 MAP3K4 0.415068125  
ILMN\_2118773 ASAH2B 0.415008141  
ILMN\_1656501 DUSP5 0.414985758  
ILMN\_1753342 SAT1 0.414979153  
ILMN\_1694525 NFK1 0.414970801  
ILMN\_1710544 PCDH7 0.4149537  
ILMN\_1691201 FAM21C 0.414919691  
ILMN\_2350357 ZNF254 0.414846167  
ILMN\_3248487 RPL7A 0.41475777  
ILMN\_1731546 RPL26 0.414696557  
ILMN\_1793378 KCTD16 0.414554353  
ILMN\_1774389 IRRX36 0.414538408  
ILMN\_1769473 SETD2 0.414511344  
ILMN\_1664012 CANT1 0.414499981  
ILMN\_2321437 NCL 0.414444826  
ILMN\_2396269 CDH24 0.414400529  
ILMN\_2086105 SPPH4 0.414361563  
ILMN\_1750883 SRP9 0.414332034  
ILMN\_2388507 AKT1 0.414301161  
ILMN\_1742521 GRB2 0.414287477  
ILMN\_1669607 PHKG2 0.414266088  
ILMN\_1696434 LAMA1 0.414215177  
ILMN\_1801101 ZBTB48 0.414174162  
ILMN\_1796755 ITGB5 0.414086349  
ILMN\_3242293 SPOYE7P 0.414066772  
ILMN\_2413780 SEZ6L2 0.414007236  
ILMN\_1807492 PSMC1 0.413926101  
ILMN\_1705783 NFK1 0.413882008  
ILMN\_2382500 MSAL14 0.413861363  
ILMN\_2057566 PGP 0.413861357  
ILMN\_1701195 PLA2G7 0.413844395  
ILMN\_1790472 SLC25A28 0.413832575  
ILMN\_1669424 YBX1 0.413829372  
ILMN\_2443112 RNF182 0.413799628  
ILMN\_1722292 AXL9 0.413769992  
ILMN\_3235326 LOC388796 0.413757497  
ILMN\_1777164 DIP2A 0.413691749  
ILMN\_1799099 TEXT3 0.413641894  
ILMN\_2200636 KIAA1267 0.413619997  
ILMN\_1757604 TPX2 0.413367853  
ILMN\_3247452 OST4 0.413336723  
ILMN\_2069128 EPB41L2 0.413309125  
ILMN\_1696494 CMTM6 0.413271563  
ILMN\_1726434 UNC45A 0.413255256  
ILMN\_1662963 PSD2 0.413240678  
ILMN\_2367010 GPR126 0.413228458  
ILMN\_1705991 SML4 0.413177901  
ILMN\_1750507 RPL9 0.413170652  
ILMN\_3250147 ZNF626 0.413098319  
ILMN\_1654289 ELK1 0.413084135  
ILMN\_1652161 PPKD 0.412891514  
ILMN\_3301749 SPNS2 0.412862842  
ILMN\_1731907 LOC349114 0.412714787  
ILMN\_1757631 DBNDD1 0.412671784  
ILMN\_3310558 MIR302D 0.412571785  
ILMN\_1703326 GPR44 0.412488714  
ILMN\_1714622 TRRC6A 0.412347866  
ILMN\_1678669 RRM2 0.412337887  
ILMN\_2211122 TRAPP2C 0.412281427  
ILMN\_1802706 IDH3G 0.412277646  
ILMN\_1663681 SNORD54 0.41224746  
ILMN\_2226304 ANKRD50 0.412245973  
ILMN\_1757134 MPV17L2 0.412167977  
ILMN\_2237734 TRRC18 0.412148375  
ILMN\_1707631 MED10 0.412121219  
ILMN\_2038772 RPS9 0.412072053  
ILMN\_1735148 SEC24B 0.412059987  
ILMN\_1759341 MAN2B1 0.412020445  
ILMN\_1666522 ZDHHC14 0.411954974  
ILMN\_2292161 LRRX32 0.411927301  
ILMN\_1706273 MOR2 0.411911863  
ILMN\_1830984 BFO9118 0.411886485  
ILMN\_1674236 HSPB1 0.411843784  
ILMN\_2332368 VPS13B 0.411843169  
ILMN\_3249624 PRO1P1 0.411812212  
ILMN\_2318643 TGF1 0.411806036  
ILMN\_1694475 GTPBP2 0.411794443  
ILMN\_1799642 TRIM24 0.411697892  
ILMN\_1744912 CTTN 0.411642308  
ILMN\_1685676 TTC9C 0.411540501  
ILMN\_1808435 OCT 0.411534892  
ILMN\_1745075 RPLP0 0.411503174  
ILMN\_1751871 STK11 0.411351123  
ILMN\_1687867 KRT8 0.411336505  
ILMN\_2055330 KIF26B 0.41130123  
ILMN\_1727194 CALU 0.411277094  
ILMN\_1721762 ILIRAP 0.411255921  
ILMN\_1693438 FBX12 0.411221277

|              |              |             |
|--------------|--------------|-------------|
| ILMN_1662174 | ORMDL3       | 0.411188442 |
| ILMN_1731609 | CHMP6        | 0.411147077 |
| ILMN_1813553 | CSPP1        | 0.411132188 |
| ILMN_1803527 | PSMG3        | 0.410926077 |
| ILMN_3240110 | CSRN2        | 0.410921199 |
| ILMN_1764794 | PSM82        | 0.410889953 |
| ILMN_1724907 | NUDT3        | 0.410883013 |
| ILMN_1755589 | DIP28        | 0.410721407 |
| ILMN_1789842 | DNAIC5       | 0.410680809 |
| ILMN_1664910 | RPSA         | 0.410643164 |
| ILMN_3209883 | LOC653075    | 0.410586377 |
| ILMN_1797964 | PFAAP1       | 0.410489515 |
| ILMN_1716300 | CDH7         | 0.410483828 |
| ILMN_2093720 | THG1L        | 0.410468345 |
| ILMN_1656516 | ZMYM8        | 0.410271862 |
| ILMN_3188984 | ZNFY1-AS1    | 0.410213424 |
| ILMN_1724540 | ALX1         | 0.410139184 |
| ILMN_2051867 | PTCD2        | 0.410135002 |
| ILMN_2092850 | HPSE         | 0.410033399 |
| ILMN_1682717 | IER3         | 0.410032938 |
| ILMN_1716089 | KANK2        | 0.409980956 |
| ILMN_1770787 | DDAH2        | 0.409945563 |
| ILMN_1668721 | CCND3        | 0.409890697 |
| ILMN_1717990 | CALD1        | 0.409884539 |
| ILMN_2386849 | DSE          | 0.409850625 |
| ILMN_1725417 | NELL2        | 0.409847752 |
| ILMN_1718960 | SEPRINB      | 0.409828357 |
| ILMN_2098446 | PMAIP1       | 0.409768518 |
| ILMN_1804415 | SMAGP        | 0.409746615 |
| ILMN_2110252 | NPM3         | 0.409717791 |
| ILMN_2089167 | RHOD         | 0.40955041  |
| ILMN_1738326 | EF4E2        | 0.409488942 |
| ILMN_1703370 | ZDHHC12      | 0.409486505 |
| ILMN_1758939 | RPK2         | 0.409350404 |
| ILMN_1703803 | ADAMT53      | 0.409302079 |
| ILMN_3214532 | RPL21        | 0.409176968 |
| ILMN_1822775 | DB336446     | 0.409147852 |
| ILMN_1713491 | VAMP2        | 0.409124865 |
| ILMN_1680626 | PD46         | 0.409102317 |
| ILMN_1740160 | PLCG1        | 0.409000996 |
| ILMN_1772644 | EML3         | 0.408997467 |
| ILMN_1708416 | ARL6IP1      | 0.408944764 |
| ILMN_1777906 | MAP7D1       | 0.408937038 |
| ILMN_3218223 | MPHOSPH10    | 0.408877248 |
| ILMN_1700477 | MIR443       | 0.408867608 |
| ILMN_1677402 | CL10r96      | 0.40885333  |
| ILMN_1671142 | GPR68        | 0.408771073 |
| ILMN_1791759 | CXCL10       | 0.408677901 |
| ILMN_1795228 | ZFAND5       | 0.408652086 |
| ILMN_1783712 | CL5orf88     | 0.408658556 |
| ILMN_2412024 | IND6         | 0.408527486 |
| ILMN_1763207 | BATF3        | 0.408519996 |
| ILMN_1758963 | NADK         | 0.408457254 |
| ILMN_3247506 | FCGR1C       | 0.40845678  |
| ILMN_1763326 | CSorf25      | 0.408340905 |
| ILMN_1746516 | RPS25        | 0.408334136 |
| ILMN_1687538 | ETS1         | 0.408278332 |
| ILMN_1767747 | HDAC2        | 0.408237327 |
| ILMN_1651610 | SPRY1        | 0.408222638 |
| ILMN_1691165 | CLSPN        | 0.408217541 |
| ILMN_2320964 | ADAR         | 0.408158886 |
| ILMN_1765923 | CL7orf101    | 0.408144772 |
| ILMN_3236825 | RAPGEF5      | 0.408126524 |
| ILMN_2128750 | PTTG1IP      | 0.408064748 |
| ILMN_2136455 | C3orf64      | 0.408048425 |
| ILMN_1733157 | THSD1        | 0.407925136 |
| ILMN_1770892 | YY1          | 0.407903778 |
| ILMN_1768470 | EF4G1        | 0.407824227 |
| ILMN_1712026 | NLRP3        | 0.407749917 |
| ILMN_2069267 | BAGE         | 0.407714137 |
| ILMN_2399036 | SEPN1        | 0.40768172  |
| ILMN_1809488 | SPCS2        | 0.407660792 |
| ILMN_2205891 | SMAD7        | 0.40764416  |
| ILMN_2213136 | LEF1         | 0.407625403 |
| ILMN_2261600 | FCGR1B       | 0.407594246 |
| ILMN_1689146 | GABRP        | 0.407519805 |
| ILMN_1773470 | ST5          | 0.407437136 |
| ILMN_1797684 | PDCD2        | 0.40741978  |
| ILMN_1708029 | TMEM88       | 0.407416221 |
| ILMN_1723477 | RUNKIT1      | 0.4073579   |
| ILMN_1765409 | STAM         | 0.407331668 |
| ILMN_1776105 | PSPH         | 0.407258303 |
| ILMN_1763347 | PIK3CB       | 0.407165148 |
| ILMN_3233748 | NA           | 0.407135937 |
| ILMN_2364828 | OGT          | 0.407106022 |
| ILMN_1795198 | OTUB2        | 0.406981091 |
| ILMN_2211922 | AKO57583     | 0.406899266 |
| ILMN_1763524 | LZTS2        | 0.406896904 |
| ILMN_1733023 | CCT6P1       | 0.406888095 |
| ILMN_1682960 | DTNBP1       | 0.406884948 |
| ILMN_1715809 | OSFRP1       | 0.406877773 |
| ILMN_2350574 | MYADM        | 0.406799755 |
| ILMN_2244087 | DNAIC28      | 0.406778079 |
| ILMN_3274814 | LOC100133286 | 0.406766764 |
| ILMN_1773620 | SMARCC2      | 0.406739161 |
| ILMN_1825027 | AK124463     | 0.406701413 |
| ILMN_1781999 | ASC2         | 0.406599267 |
| ILMN_1746171 | H2AFY        | 0.406586338 |

|              |              |             |
|--------------|--------------|-------------|
| ILMN_1767448 | LHPF         | 0.406574465 |
| ILMN_1698179 | TAGLN3       | 0.406574047 |
| ILMN_2395389 | PSM44        | 0.406507737 |
| ILMN_1673757 | CASF9        | 0.406458862 |
| ILMN_1802089 | SYMPK        | 0.406242619 |
| ILMN_2296037 | PTPN2        | 0.406176224 |
| ILMN_2103591 | MORC2        | 0.406088712 |
| ILMN_1723004 | CD72         | 0.406010162 |
| ILMN_3302177 | RL14         | 0.405934475 |
| ILMN_2374403 | TSC2D3       | 0.405884985 |
| ILMN_2298958 | MBRF         | 0.405876843 |
| ILMN_1672662 | SLC20A1      | 0.405864645 |
| ILMN_1741422 | FUT8         | 0.405862056 |
| ILMN_1803997 | SOCCAG3      | 0.40584687  |
| ILMN_1747589 | HST2H2AB     | 0.405839161 |
| ILMN_1657591 | SCN3A        | 0.405808667 |
| ILMN_1654072 | CK3CL1       | 0.40563885  |
| ILMN_1657771 | CRTC2        | 0.405549282 |
| ILMN_1675124 | DDX17        | 0.405499802 |
| ILMN_3305055 | TP63         | 0.405448798 |
| ILMN_1783303 | HSP90AB4P    | 0.405344615 |
| ILMN_2264131 | TPAL         | 0.405335744 |
| ILMN_1683692 | LRCH1        | 0.405298274 |
| ILMN_2395375 | GABBR1       | 0.405263892 |
| ILMN_1779034 | NADSYN1      | 0.405249166 |
| ILMN_1745385 | HNRNPM       | 0.405216565 |
| ILMN_1766593 | PIRF1        | 0.405129581 |
| ILMN_1683598 | ACSL4        | 0.40507251  |
| ILMN_1772959 | PDCD7        | 0.404938384 |
| ILMN_2404049 | RBM38        | 0.404846124 |
| ILMN_1712755 | LRRC41       | 0.404624074 |
| ILMN_3203126 | LOC100131662 | 0.404609992 |
| ILMN_1715636 | EF3B         | 0.404530213 |
| ILMN_1659054 | CHK8         | 0.404494938 |
| ILMN_2374449 | SPP1         | 0.404457264 |
| ILMN_3243291 | HNRNPA1      | 0.404438085 |
| ILMN_1734742 | ARHGDI4      | 0.404389914 |
| ILMN_1664610 | RPS17        | 0.404352527 |
| ILMN_1708728 | H2AF1        | 0.404314257 |
| ILMN_1789283 | PPP2R5C      | 0.404298505 |
| ILMN_1751444 | NCAPG        | 0.404246717 |
| ILMN_1670378 | FAM115A      | 0.404146453 |
| ILMN_1798543 | STK17B       | 0.404092572 |
| ILMN_3005410 | CL50F48      | 0.404029984 |
| ILMN_2133675 | SESN         | 0.40399417  |
| ILMN_2297864 | MTMR14       | 0.403989515 |
| ILMN_1785161 | CHCHD6       | 0.403986296 |
| ILMN_2145280 | DEF6         | 0.4039455   |
| ILMN_2316386 | GPBAR1       | 0.403898621 |
| ILMN_1664828 | APORCE3H     | 0.403819571 |
| ILMN_1343291 | EEF1A1       | 0.403803862 |
| ILMN_1686082 | CL4orf79     | 0.40373627  |
| ILMN_1810531 | DRG2         | 0.403721239 |
| ILMN_2327244 | CALCA        | 0.403681481 |
| ILMN_1724532 | CL1orf49     | 0.403674215 |
| ILMN_1743217 | SNORD32A     | 0.403643742 |
| ILMN_1674811 | OASL         | 0.403598604 |
| ILMN_1754303 | RPL30        | 0.403591802 |
| ILMN_1791144 | PMS2L14      | 0.403523494 |
| ILMN_2358457 | ATF4         | 0.403474728 |
| ILMN_3251536 | FAM127C      | 0.403458741 |
| ILMN_1724994 | COL4A2       | 0.403373861 |
| ILMN_2242463 | CTSC         | 0.403366721 |
| ILMN_1772387 | TLR2         | 0.403325042 |
| ILMN_3192156 | LOC100130932 | 0.403192604 |
| ILMN_1804863 | FKBP15       | 0.403099948 |
| ILMN_2251279 | WDR45        | 0.403065663 |
| ILMN_1794392 | DDX3X        | 0.403050847 |
| ILMN_1668465 | KIAA1609     | 0.403042801 |
| ILMN_1652929 | POG2         | 0.403036708 |
| ILMN_1743199 | EGR2         | 0.402939005 |
| ILMN_2231608 | CTAGE15P     | 0.402926558 |
| ILMN_1651850 | RPS16        | 0.402920932 |
| ILMN_1693973 | BCD11        | 0.402885937 |
| ILMN_1744508 | FAM53C       | 0.402883781 |
| ILMN_1699545 | PCSK7        | 0.402851248 |
| ILMN_3263329 | GAR1         | 0.402845042 |
| ILMN_1800512 | HMOX1        | 0.402787547 |
| ILMN_1768260 | GAS6         | 0.402666935 |
| ILMN_1689456 | ZBTB20       | 0.402646654 |
| ILMN_1791483 | PDE4D        | 0.402652414 |
| ILMN_1717477 | PSD3         | 0.402648169 |
| ILMN_1715500 | SS18L1       | 0.402618138 |
| ILMN_1716704 | NLRCS        | 0.402611189 |
| ILMN_3238931 | DEFB130      | 0.402542884 |
| ILMN_1682194 | DCN          | 0.402402818 |
| ILMN_2415179 | CLTN1        | 0.402334932 |
| ILMN_1767665 | GPX8         | 0.402294945 |
| ILMN_1764082 | MBOAT1       | 0.40221169  |
| ILMN_2121207 | FAM125A      | 0.402174669 |
| ILMN_1781099 | ISY1         | 0.402108913 |
| ILMN_1704500 | STAP2        | 0.402034859 |
| ILMN_1726589 | CD248        | 0.401958747 |
| ILMN_1666910 | GAB1         | 0.401764262 |
| ILMN_3229467 | EBP1         | 0.401759333 |
| ILMN_1685680 | SPATA1       | 0.401698996 |
| ILMN_1803788 | LCAL3        | 0.401609945 |
| ILMN_2366134 | FERMT3       | 0.401603952 |

|              |             |             |
|--------------|-------------|-------------|
| ILMN_1745583 | EXOC1       | 0.401546342 |
| ILMN_1658472 | APH1A       | 0.401429831 |
| ILMN_3243972 | SNORA70B    | 0.401392847 |
| ILMN_1671010 | ZNF767      | 0.401383992 |
| ILMN_1775004 | KCNQ3       | 0.401376642 |
| ILMN_1756992 | MUC1        | 0.401361703 |
| ILMN_1754145 | CAPRN1      | 0.401300493 |
| ILMN_1680437 | EEF1G       | 0.401277935 |
| ILMN_2205999 | OSMR        | 0.401239187 |
| ILMN_2100167 | RAP1GDS1    | 0.401085211 |
| ILMN_1712357 | HNRNPK      | 0.401044617 |
| ILMN_1651642 | GPC2        | 0.401004703 |
| ILMN_3289352 | RPL6        | 0.400913527 |
| ILMN_1731648 | FOXJ2       | 0.400880227 |
| ILMN_2140895 | HCC_1646325 | 0.400849638 |
| ILMN_3187324 | CHRF1       | 0.400846679 |
| ILMN_2386902 | TRIM6       | 0.400845119 |
| ILMN_2284941 | ABCF2       | 0.40080859  |
| ILMN_1723729 | RSL1D1      | 0.400775187 |
| ILMN_1757847 | C11orf68    | 0.400694991 |
| ILMN_1690546 | PPP3CC      | 0.40028074  |
| ILMN_1704290 | SPTLC2      | 0.400275193 |
| ILMN_1710756 | ENO1        | 0.400251804 |
| ILMN_1664028 | CENPB       | 0.400174047 |
| ILMN_1774287 | CFB         | 0.400082623 |
| ILMN_1727249 | FAM21C      | 0.400079383 |
| ILMN_1773868 | ZRSR2       | 0.400058291 |
