# Supplementary material for: Intrarenal activation of adaptive immune effectors is associated with tubular damage and impaired renal function in lupus nephritis
Source: PubMed Central journal article supplement (PMC6241616; doi:10.1136/annrheumdis-2018-213485), 2018-07-31
Supplement: annrheumdis-2018-213485supp011.pdf [file annrheumdis-2018-213485supp011.pdf]

|              |              |             |
|--------------|--------------|-------------|
| ILMN_1808290 | LOC286467    | 0.401277488 |
| ILMN_2387712 | AK5          | 0.40116742  |
| ILMN_2055396 | TTT17        | 0.401148479 |
| ILMN_1752952 | MMF28        | 0.401009814 |
| ILMN_1856031 | BC040892     | 0.400943199 |
| ILMN_3282387 | LOC100131373 | 0.400909017 |
| ILMN_2225151 | DLX6         | 0.400906363 |
| ILMN_1739357 | OPRM1        | 0.40089347  |
| ILMN_1843648 | AW873324     | 0.400725729 |
| ILMN_3251278 | DPPA3        | 0.40066857  |
| ILMN_1659209 | LOC728012    | 0.400541369 |
| ILMN_1718932 | MTR8         | 0.400435898 |
| ILMN_1684359 | UPF0839      | 0.400405737 |
| ILMN_3302373 | MALIC3B2     | 0.400270563 |
| ILMN_3310216 | MIR1911      | 0.400214107 |
| ILMN_1849399 | LOC100630918 | 0.400171982 |
| ILMN_2087060 | TOMM7        | 0.400157156 |
| ILMN_3253310 | BC150587     | 0.4000732   |

| Annotation Cluster     | Enrichment Score                                                    | Count | P_Value  | Benjamini |
|------------------------|---------------------------------------------------------------------|-------|----------|-----------|
| INTERPRO               | <a href="#">immunoglobulin subtype</a>                              | 10    | 4.90E-01 | 1.00E+00  |
| SMART                  | <a href="#">ig</a>                                                  | 10    | 5.00E-01 | 9.90E-01  |
| KEGG_PATHWAY           | <a href="#">Cell adhesion molecule (CAM)</a>                        | 5     | 5.30E-01 | 9.90E-01  |
| INTERPRO               | <a href="#">immunoglobulin I-set</a>                                | 4     | 7.00E-01 | 1.00E+00  |
| SP_PIR_KEYWORDS        | <a href="#">immunoglobulin domain</a>                               | 10    | 8.40E-01 | 1.00E+00  |
| INTERPRO               | <a href="#">immunoglobulin like</a>                                 | 10    | 9.10E-01 | 1.00E+00  |
| INTERPRO               | <a href="#">immunoglobulin like fold</a>                            | 10    | 9.50E-01 | 1.00E+00  |
| INTERPRO               | <a href="#">immunoglobulin V-set</a>                                | 4     | 9.60E-01 | 1.00E+00  |
| Enrichment Score: 0.39 |                                                                     | Count | P_Value  | Benjamini |
| GOTERM_BP_FAT          | <a href="#">camera-type eye development</a>                         | 5     | 2.90E-01 | 9.90E-01  |
| GOTERM_BP_FAT          | <a href="#">eye development</a>                                     | 5     | 4.40E-01 | 1.00E+00  |
| GOTERM_BP_FAT          | <a href="#">eye morphogenesis</a>                                   | 3     | 5.30E-01 | 1.00E+00  |
| Enrichment Score: 0.39 |                                                                     | Count | P_Value  | Benjamini |
| GOTERM_MF_FAT          | <a href="#">ion binding</a>                                         | 124   | 2.00E-01 | 9.90E-01  |
| GOTERM_MF_FAT          | <a href="#">metal ion binding</a>                                   | 121   | 2.10E-01 | 9.80E-01  |
| GOTERM_MF_FAT          | <a href="#">metal binding</a>                                       | 82    | 2.30E-01 | 8.70E-01  |
| GOTERM_MF_FAT          | <a href="#">cation binding</a>                                      | 121   | 2.50E-01 | 9.80E-01  |
| SP_PIR_KEYWORDS        | <a href="#">zinc finger</a>                                         | 42    | 6.00E-01 | 9.80E-01  |
| GOTERM_MF_FAT          | <a href="#">zinc</a>                                                | 52    | 7.40E-01 | 9.90E-01  |
| GOTERM_MF_FAT          | <a href="#">transition metal ion binding</a>                        | 72    | 7.50E-01 | 1.00E+00  |
| GOTERM_MF_FAT          | <a href="#">zinc ion binding</a>                                    | 55    | 9.10E-01 | 1.00E+00  |
| Enrichment Score: 0.38 |                                                                     | Count | P_Value  | Benjamini |
| GOTERM_BP_FAT          | <a href="#">carbohydrate catabolic process</a>                      | 5     | 3.10E-01 | 9.90E-01  |
| GOTERM_BP_FAT          | <a href="#">cellular carbohydrate catabolic process</a>             | 4     | 3.70E-01 | 9.90E-01  |
| GOTERM_BP_FAT          | <a href="#">alcohol catabolic process</a>                           | 3     | 6.20E-01 | 1.00E+00  |
| Enrichment Score: 0.38 |                                                                     | Count | P_Value  | Benjamini |
| GOTERM_BP_FAT          | <a href="#">visual perception</a>                                   | 8     | 3.20E-01 | 9.90E-01  |
| GOTERM_BP_FAT          | <a href="#">sensory perception of light stimulus</a>                | 8     | 3.20E-01 | 9.90E-01  |
| SP_PIR_KEYWORDS        | <a href="#">vision</a>                                              | 4     | 6.80E-01 | 9.80E-01  |
| Enrichment Score: 0.38 |                                                                     | Count | P_Value  | Benjamini |
| UP_SEQ_FEATURE         | <a href="#">zinc finger region:RING-type</a>                        | 8     | 2.80E-01 | 1.00E+00  |
| INTERPRO               | <a href="#">Zinc finger_B-box</a>                                   | 4     | 2.90E-01 | 1.00E+00  |
| SMART                  | <a href="#">BBOX</a>                                                | 4     | 2.90E-01 | 9.80E-01  |
| INTERPRO               | <a href="#">Zinc finger_RING-type</a>                               | 9     | 5.10E-01 | 1.00E+00  |
| SMART                  | <a href="#">RING</a>                                                | 9     | 5.20E-01 | 9.90E-01  |
| INTERPRO               | <a href="#">Zinc finger_C2HC4_RING-type</a>                         | 7     | 5.50E-01 | 1.00E+00  |
| INTERPRO               | <a href="#">Zinc finger_RING-type_conserved site</a>                | 8     | 5.90E-01 | 1.00E+00  |
| Enrichment Score: 0.38 |                                                                     | Count | P_Value  | Benjamini |
| GOTERM_BP_FAT          | <a href="#">synaptic transmission</a>                               | 10    | 3.60E-01 | 9.90E-01  |
| GOTERM_BP_FAT          | <a href="#">cell-cell signaling</a>                                 | 18    | 3.70E-01 | 9.90E-01  |
| GOTERM_BP_FAT          | <a href="#">transmission of nerve impulse</a>                       | 10    | 5.40E-01 | 1.00E+00  |
| Enrichment Score: 0.38 |                                                                     | Count | P_Value  | Benjamini |
| UP_SEQ_FEATURE         | <a href="#">repeat:1</a>                                            | 10    | 1.60E-01 | 1.00E+00  |
| UP_SEQ_FEATURE         | <a href="#">repeat:2</a>                                            | 10    | 1.70E-01 | 1.00E+00  |
| UP_SEQ_FEATURE         | <a href="#">repeat:3</a>                                            | 9     | 1.80E-01 | 1.00E+00  |
| UP_SEQ_FEATURE         | <a href="#">repeat:4</a>                                            | 6     | 4.90E-01 | 1.00E+00  |
| UP_SEQ_FEATURE         | <a href="#">repeat:5</a>                                            | 4     | 7.10E-01 | 1.00E+00  |
| UP_SEQ_FEATURE         | <a href="#">repeat:5</a>                                            | 4     | 7.60E-01 | 1.00E+00  |
| UP_SEQ_FEATURE         | <a href="#">repeat:8</a>                                            | 3     | 8.10E-01 | 1.00E+00  |
| UP_SEQ_FEATURE         | <a href="#">repeat:7</a>                                            | 3     | 8.40E-01 | 1.00E+00  |
| Enrichment Score: 0.38 |                                                                     | Count | P_Value  | Benjamini |
| UP_SEQ_FEATURE         | <a href="#">repeat-ANK 3</a>                                        | 7     | 3.70E-01 | 1.00E+00  |
| UP_SEQ_FEATURE         | <a href="#">repeat-ANK 1</a>                                        | 8     | 3.70E-01 | 1.00E+00  |
| UP_SEQ_FEATURE         | <a href="#">repeat-ANK 2</a>                                        | 8     | 3.80E-01 | 1.00E+00  |
| SP_PIR_KEYWORDS        | <a href="#">ank-repeat</a>                                          | 8     | 4.10E-01 | 9.40E-01  |
| UP_SEQ_FEATURE         | <a href="#">repeat-ANK 6</a>                                        | 4     | 4.10E-01 | 1.00E+00  |
| UP_SEQ_FEATURE         | <a href="#">repeat-ANK 5</a>                                        | 5     | 4.20E-01 | 1.00E+00  |
| INTERPRO               | <a href="#">Ankyrin</a>                                             | 8     | 4.30E-01 | 1.00E+00  |
| SMART                  | <a href="#">ANK</a>                                                 | 8     | 4.40E-01 | 9.80E-01  |
| UP_SEQ_FEATURE         | <a href="#">repeat-ANK 4</a>                                        | 5     | 5.70E-01 | 1.00E+00  |
| Enrichment Score: 0.37 |                                                                     | Count | P_Value  | Benjamini |
| SP_PIR_KEYWORDS        | <a href="#">sushi</a>                                               | 3     | 4.10E-01 | 9.40E-01  |
| INTERPRO               | <a href="#">Sushi/SCN/CCP</a>                                       | 3     | 4.30E-01 | 1.00E+00  |
| SMART                  | <a href="#">CCP</a>                                                 | 3     | 4.40E-01 | 9.80E-01  |
| INTERPRO               | <a href="#">Complement control module</a>                           | 3     | 4.40E-01 | 1.00E+00  |
| Enrichment Score: 0.36 |                                                                     | Count | P_Value  | Benjamini |
| GOTERM_BP_FAT          | <a href="#">anaerobic respiration</a>                               | 3     | 2.30E-01 | 9.90E-01  |
| GOTERM_BP_FAT          | <a href="#">cellular respiration</a>                                | 5     | 2.40E-01 | 9.90E-01  |
| GOTERM_BP_FAT          | <a href="#">energy derivation by oxidation of organic compounds</a> | 6     | 3.10E-01 | 9.90E-01  |
| GOTERM_BP_FAT          | <a href="#">respiratory electron transport chain</a>                | 3     | 4.90E-01 | 1.00E+00  |
| GOTERM_CC_FAT          | <a href="#">mitochondrial respiratory chain</a>                     | 3     | 5.30E-01 | 9.80E-01  |
| KEGG_PATHWAY           | <a href="#">Huntington's disease</a>                                | 6     | 6.00E-01 | 9.90E-01  |
| GOTERM_CC_FAT          | <a href="#">respiratory chain</a>                                   | 3     | 6.10E-01 | 9.80E-01  |
| GOTERM_BP_FAT          | <a href="#">electron transport chain</a>                            | 3     | 7.90E-01 | 1.00E+00  |
